# Supplementary material for: Red Light Absorption of [ReI(CO)3(α-diimine)Cl] Complexes through Extension of the 4,4′-Bipyrimidine Ligand’s π-System
Source: MDPI journal article supplement (doi:10.3390/molecules28041905), 2023-02-16
Supplement: s1 [file s1]

Supplementary Materials

# Red-light absorption of $[\text{Re}^{\text{I}}(\text{CO})_3(\alpha\text{-diimine})\text{Cl}]$ complexes through extension of the 4,4'-bipyrimidine ligand's $\pi$ -system

Nicolas Meitinger <sup>1</sup>, Subrata Mandal <sup>1</sup>, Dieter Sorsche <sup>1</sup>, Andrea Pannwitz <sup>1\*</sup> and Sven Rau <sup>1,\*</sup>

<sup>1</sup> Ulm University, Institute for Inorganic Chemistry I, Albert-Einstein-Allee 11, 89081 Ulm, Germany

\* Correspondence: A. P. [andrea.pannwitz@uni-ulm.de](mailto:andrea.pannwitz@uni-ulm.de); S. R. [sven.rau@uni-ulm.de](mailto:sven.rau@uni-ulm.de)

## Table of contents

|                                                                                |    |
|--------------------------------------------------------------------------------|----|
| 1. $^1\text{H}$ -, $^{13}\text{C}$ - and (hetero)dinuclear 2D NMR spectra..... | 3  |
| 2. High resolution mass spectra.....                                           | 15 |
| 3. ATR-IR transmission spectra.....                                            | 20 |
| 4. Crystallographic information.....                                           | 23 |
| 5. Electrochemical characterization.....                                       | 30 |
| 6. UV/Vis-NIR absorption and emission spectra.....                             | 31 |
| 7. UV-Vis-NIR spectroelectrochemical measurements.....                         | 36 |
| 8. Nanosecond transient absorption spectra.....                                | 41 |

---

# 1. $^1\text{H}$ -, $^{13}\text{C}$ - and (hetero)dinuclear 2D NMR spectra

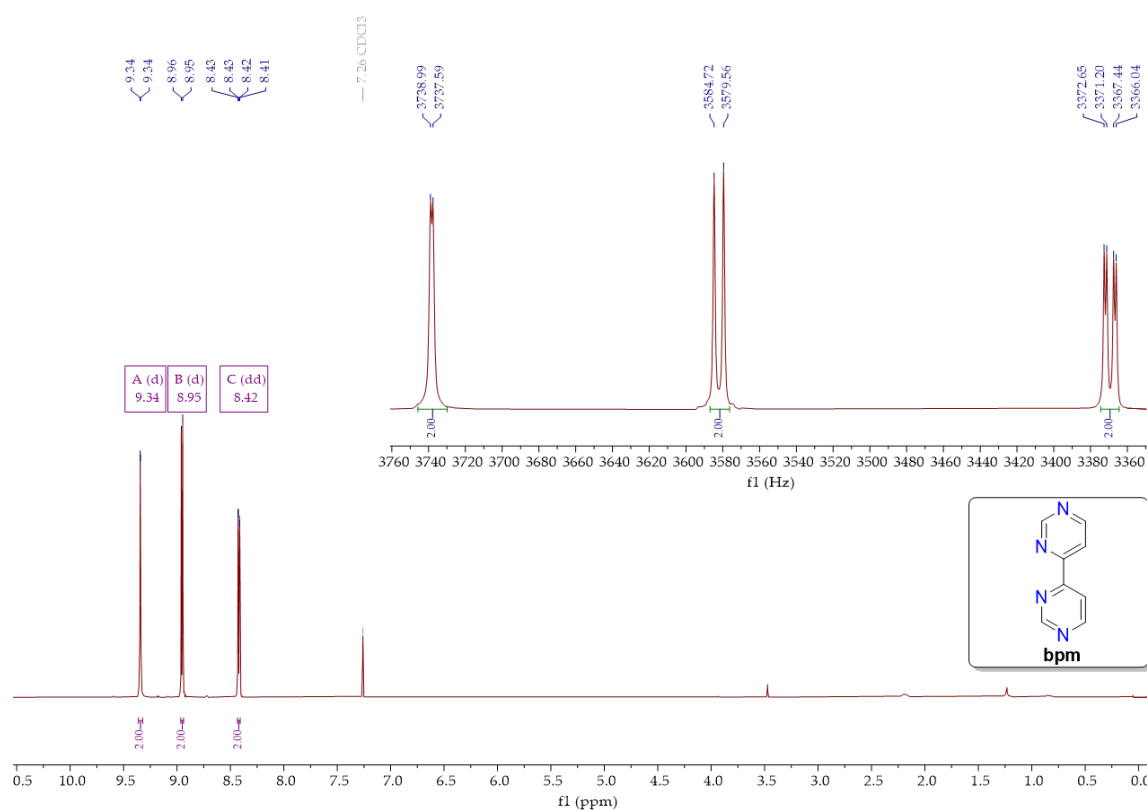

**Figure S1:**  $^1\text{H}$ -NMR spectrum (400 MHz, RT,  $\text{CDCl}_3$ ) of 4,4'-bipyrimidine (**bpm**).

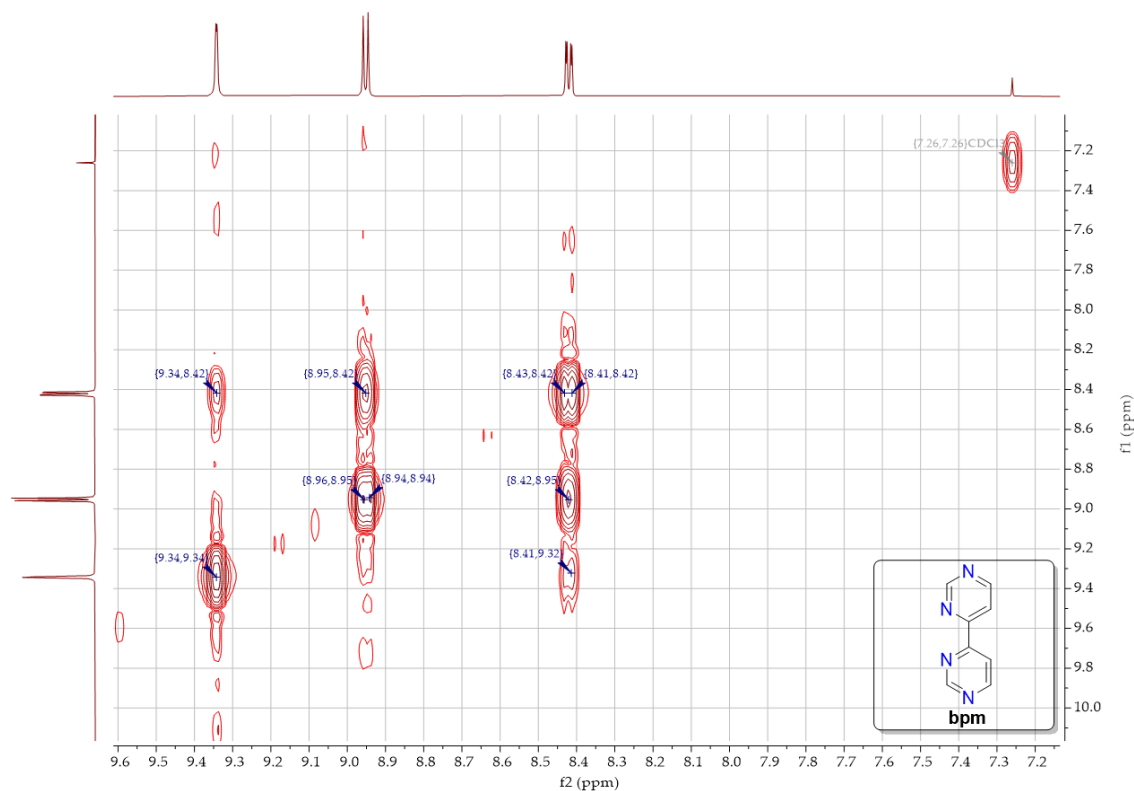

**Figure S2:**  $\text{H,H-COSY45}$  NMR spectrum (400 MHz, RT,  $\text{CDCl}_3$ ) of 4,4'-bipyrimidine (**bpm**).

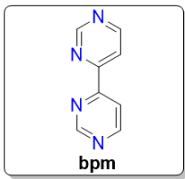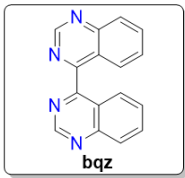

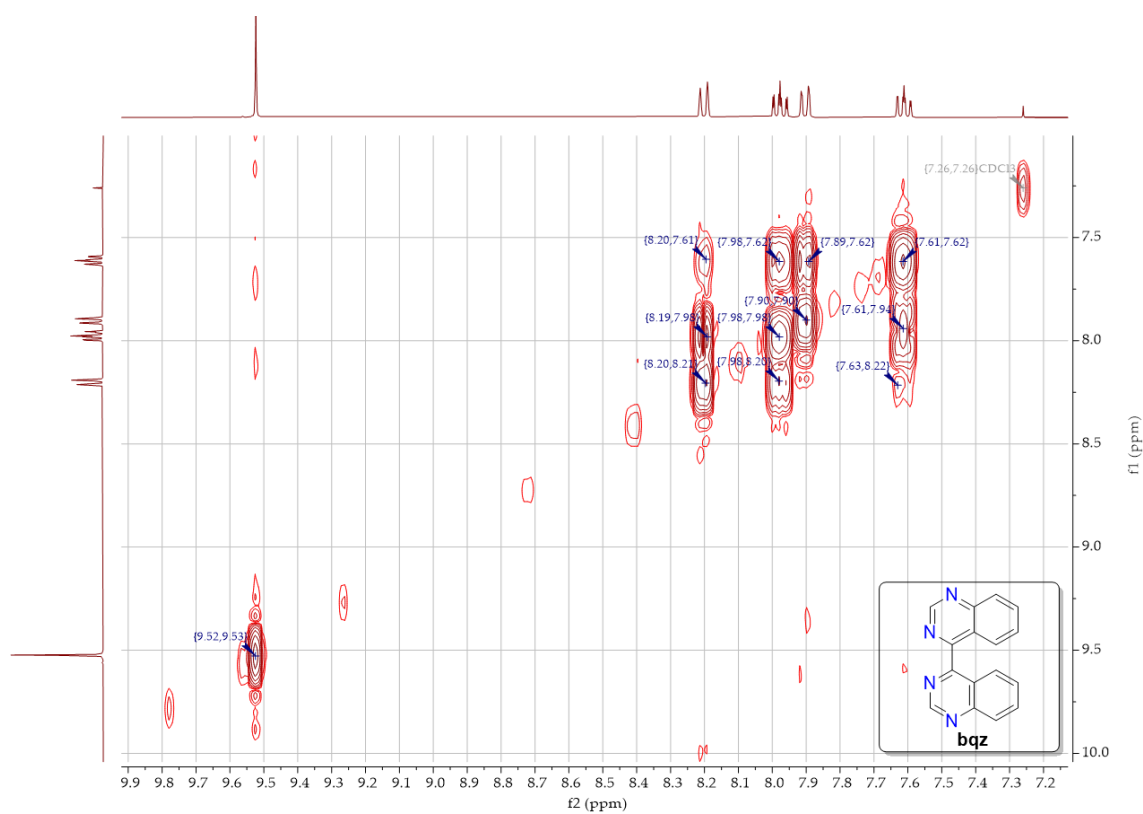

Figure S5:  $^1\text{H}$ - $^1\text{H}$ -COSY45 NMR spectrum (400 MHz, RT,  $\text{CDCl}_3$ ) of 4,4'-biquinazoline (bqz).

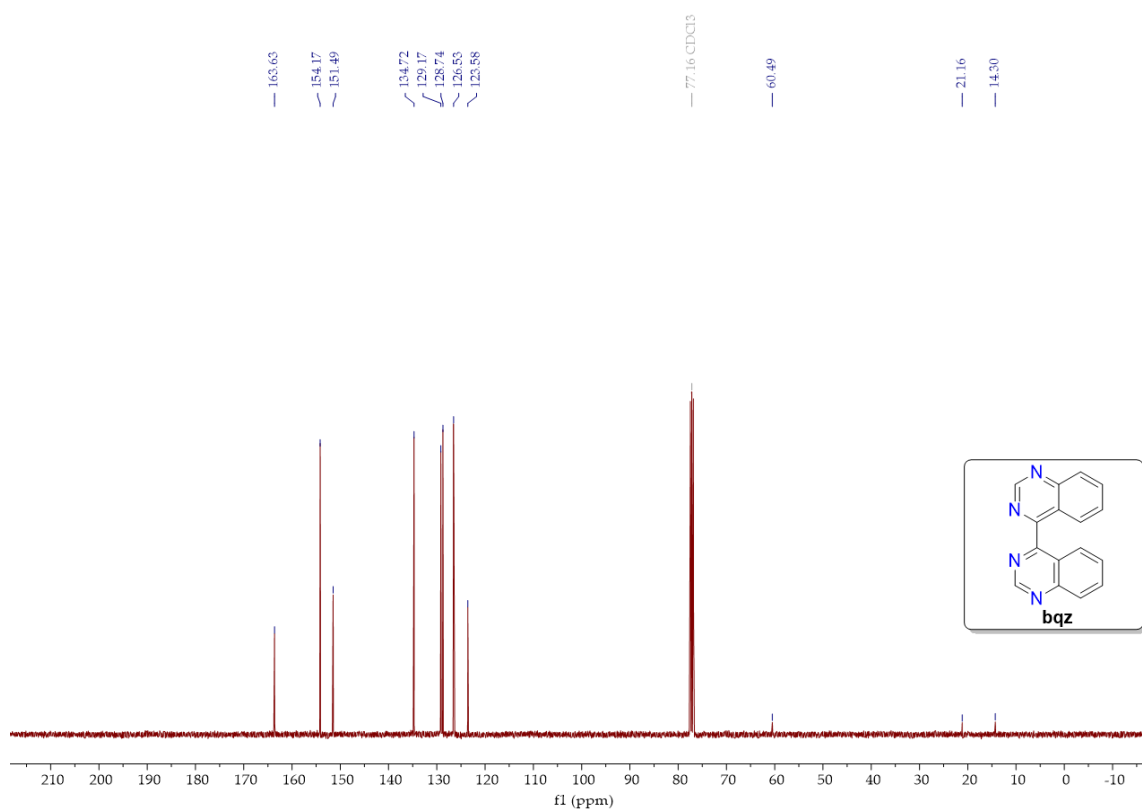

Figure S6:  $^{13}\text{C}$ -NMR spectrum (101 MHz, RT,  $\text{CDCl}_3$ ) of 4,4'-biquinazoline (bqz).

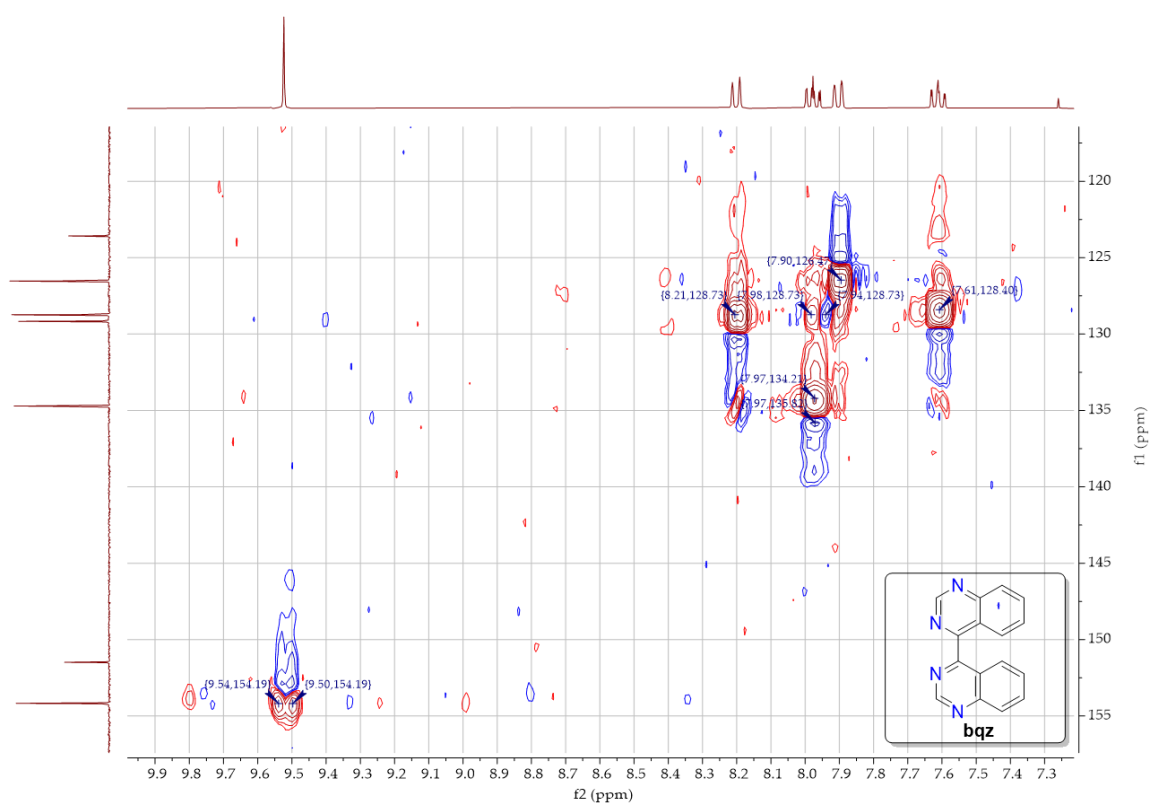

Figure S7: C,H-HSQC NMR spectrum (400/101 MHz, RT, CDCl<sub>3</sub>) of 4,4'-biquinazoline (bqz).

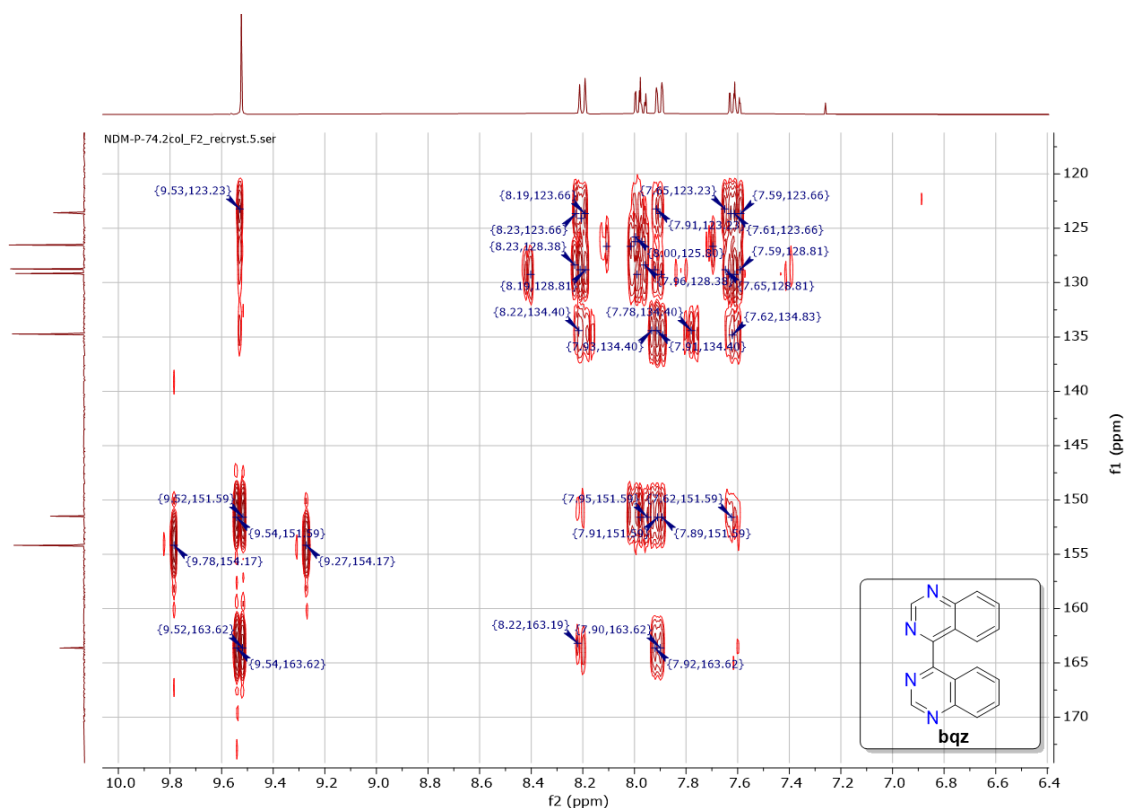

Figure S8: C,H-HMBC NMR spectrum (400/101 MHz, RT, CDCl<sub>3</sub>) of 4,4'-biquinazoline (bqz).

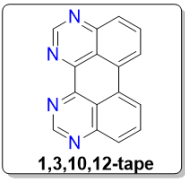

**Figure S9:**  $^1\text{H}$ -NMR spectrum (600 MHz, RT,  $\text{CDCl}_3$ ) of **1,3,10,12-tape**.

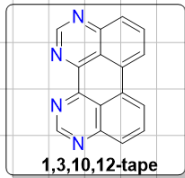

**Figure S10:** Selective H,H-COSY45 NMR spectrum (600 MHz, RT, CDCl<sub>3</sub>) of **1,3,10,12-tape**.

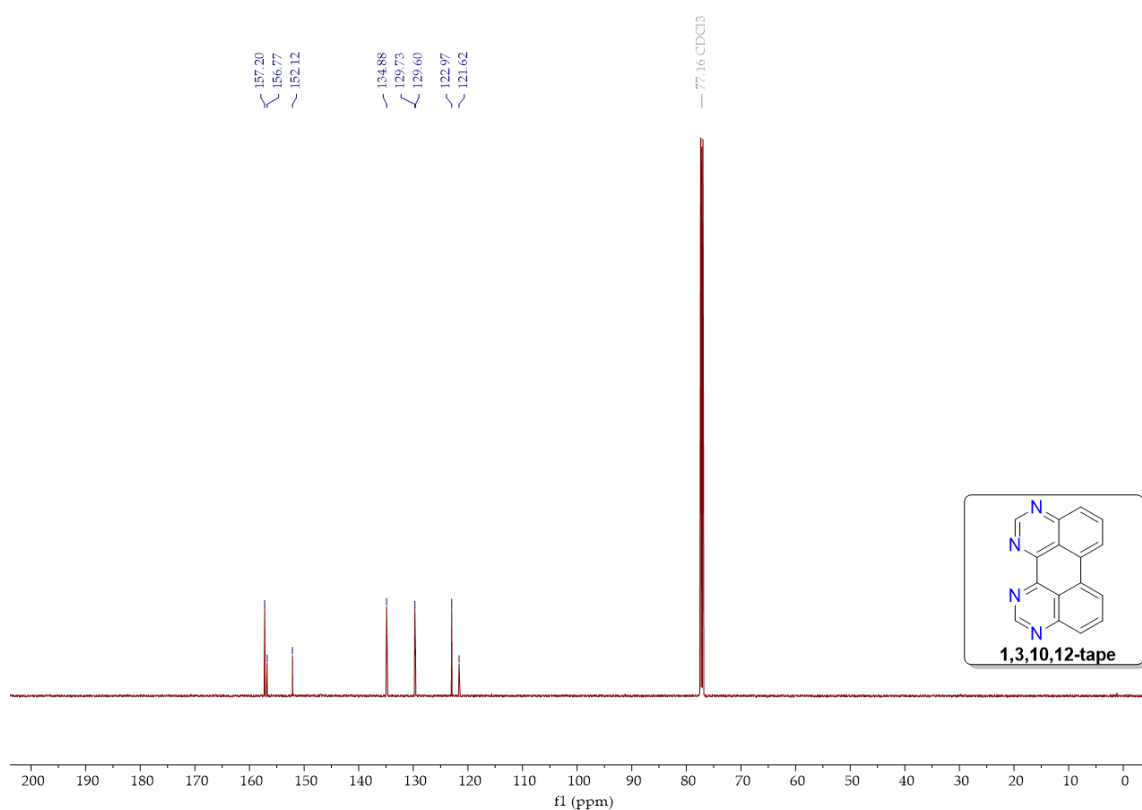

**Figure S11:** <sup>13</sup>C-NMR spectrum (151 MHz, RT, CDCl<sub>3</sub>) of **1,3,10,12-tape**.

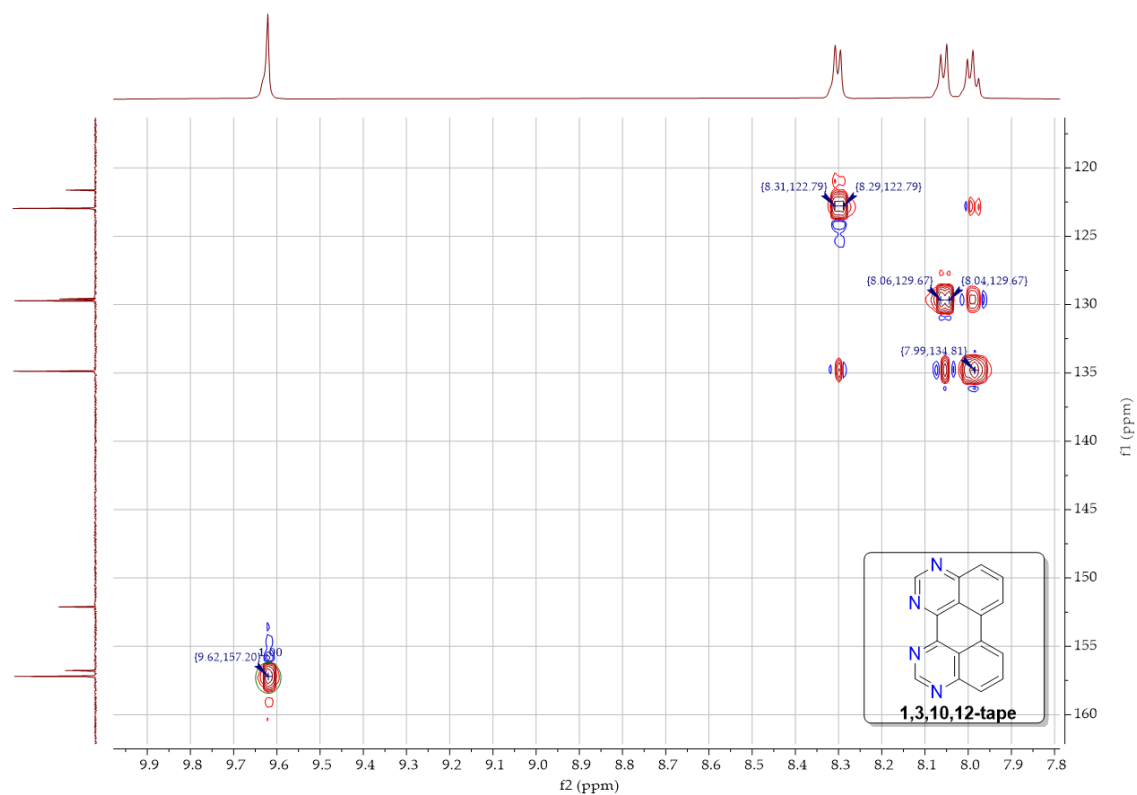

**Figure S12:** Selective C,H-HSQC NMR spectrum (600/151 MHz, RT, CDCl<sub>3</sub>) of **1,3,10,12-tape**.

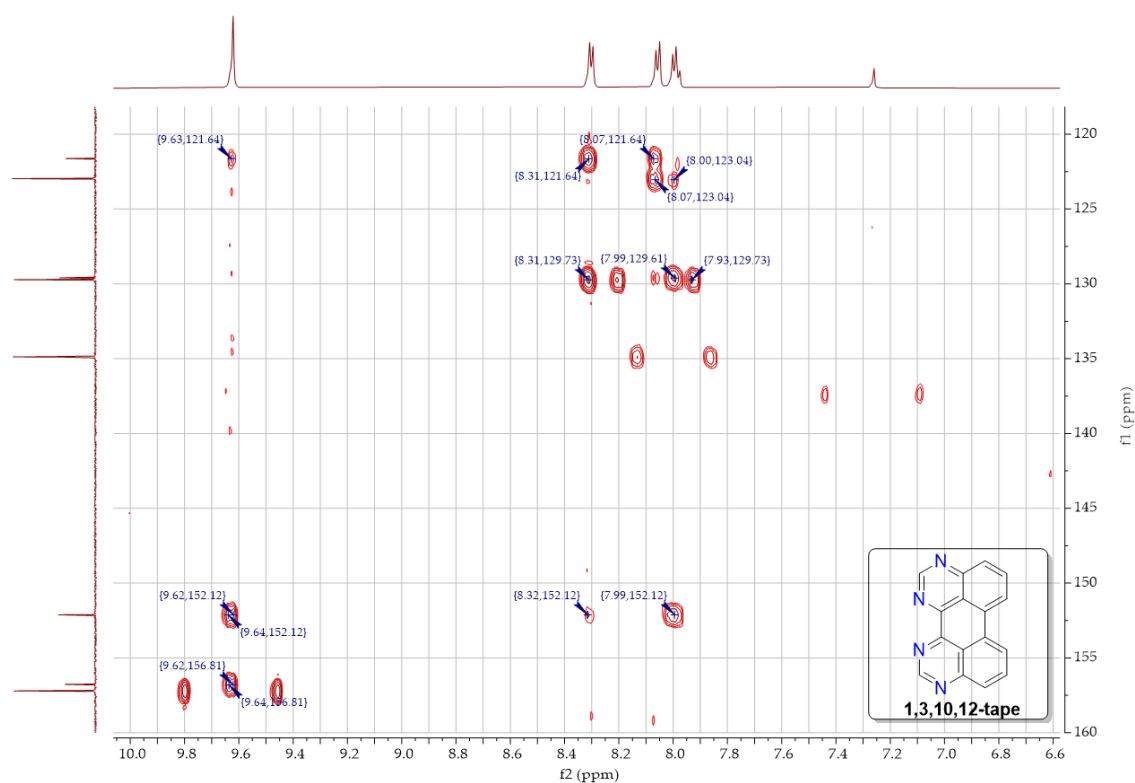

**Figure S13:** Selective C,H-HMBC NMR spectrum (600/151 MHz, RT, CDCl<sub>3</sub>) of **1,3,10,12-tape**.

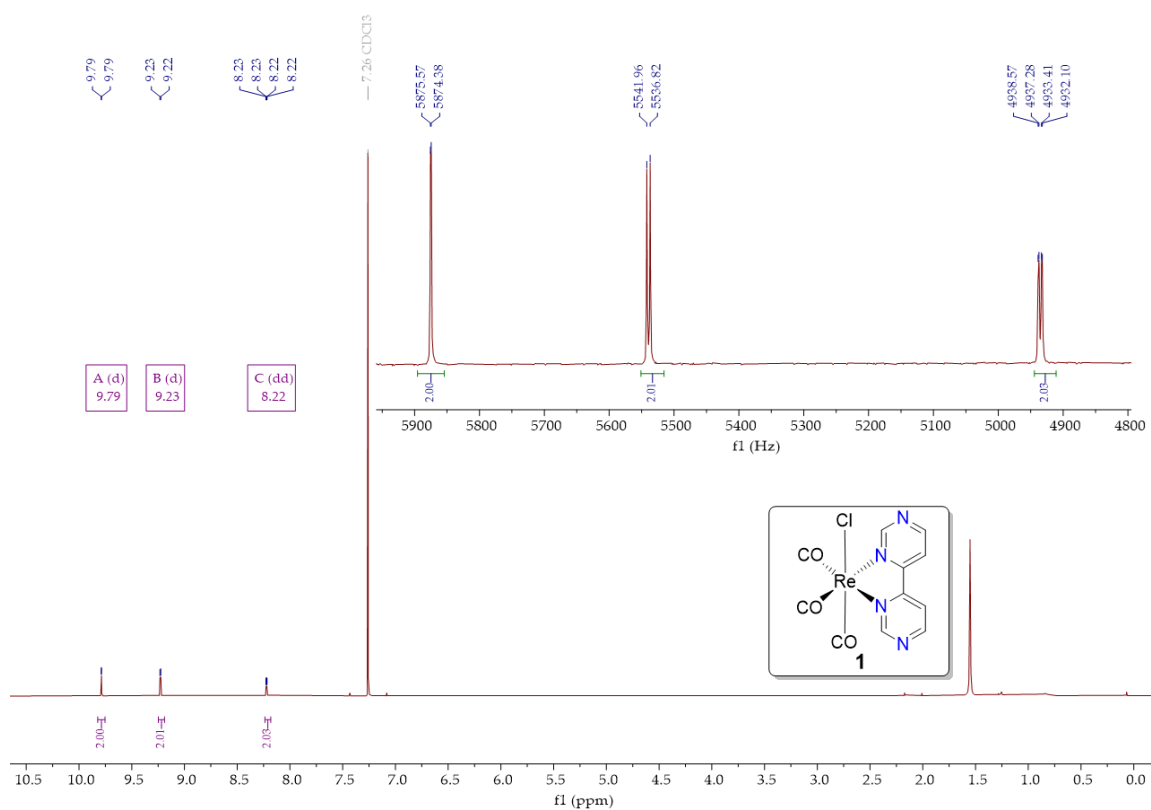

**Figure S14:** <sup>1</sup>H-NMR spectrum (600 MHz, RT, CDCl<sub>3</sub>) of [Re(CO)<sub>3</sub>(bpm)Cl] (**1**).

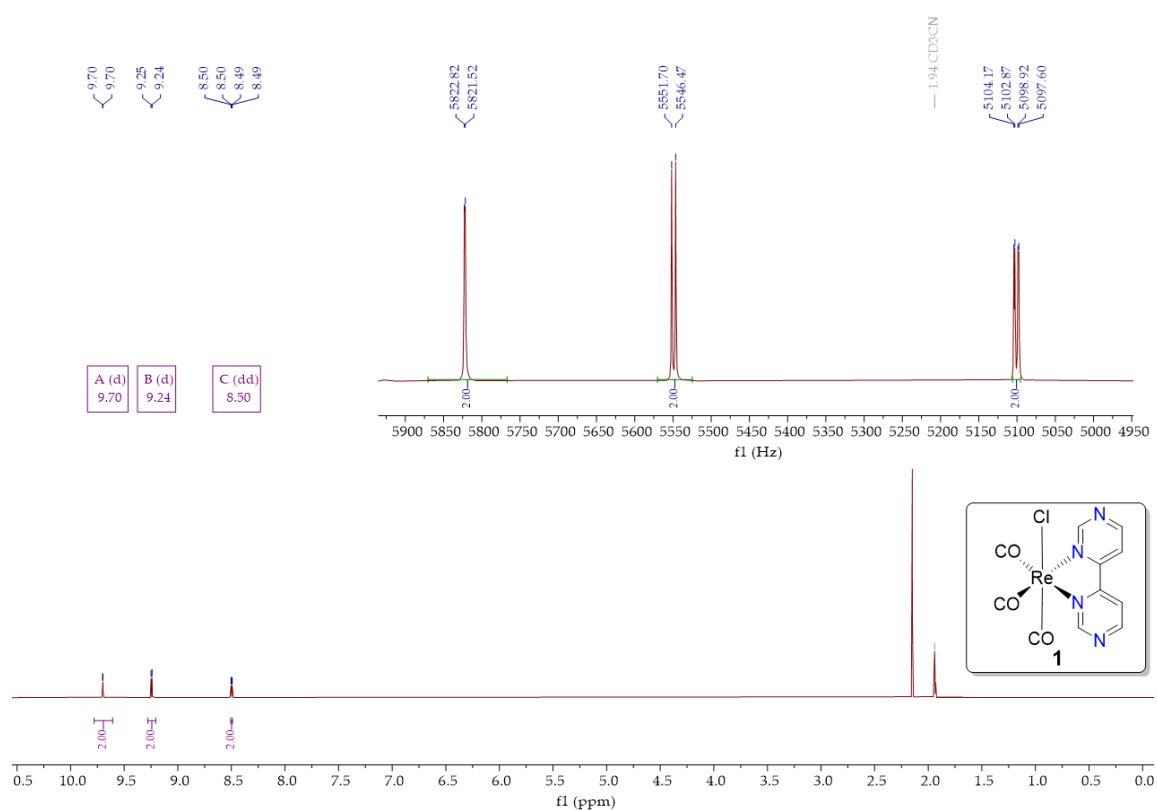

**Figure S15:**  $^1\text{H}$ -NMR spectrum (600 MHz, RT,  $\text{CD}_3\text{CN}$ ) of  $[\text{Re}(\text{CO})_3(\text{bpm})\text{Cl}]$  (**1**).

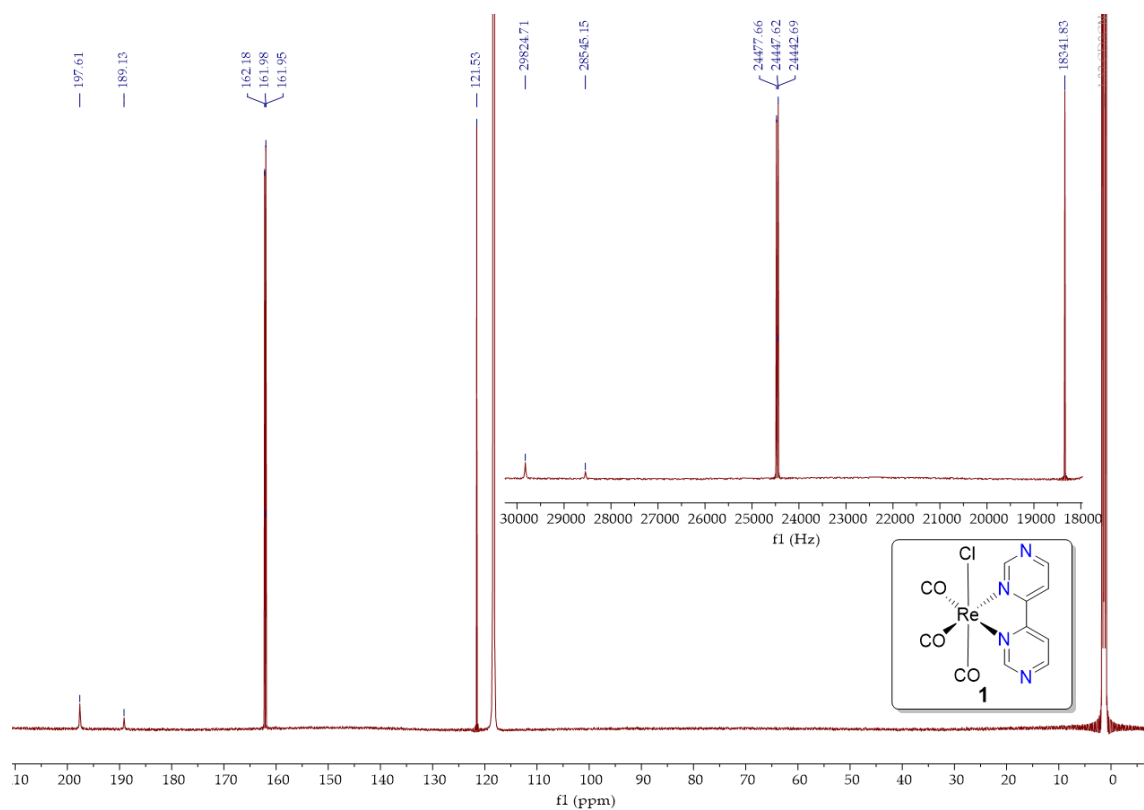

**Figure S16:**  $^{13}\text{C}$ -UDFT-NMR spectrum (151 MHz, RT,  $\text{CD}_3\text{CN}$ ) of  $[\text{Re}(\text{CO})_3(\text{bpm})\text{Cl}]$  (**1**).

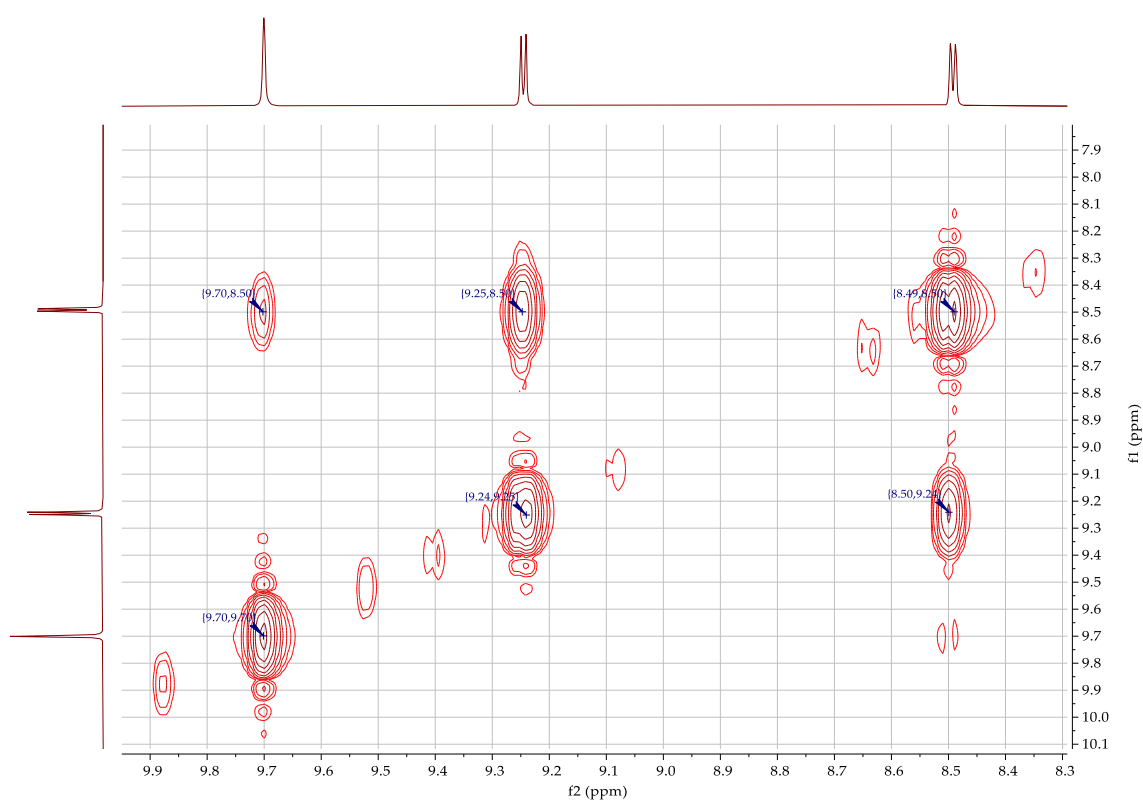

**Figure S17:** H,H-COSY45 NMR spectrum (400 MHz, RT, CD<sub>3</sub>CN) of [Re(CO)<sub>3</sub>(bpm)Cl] (1).

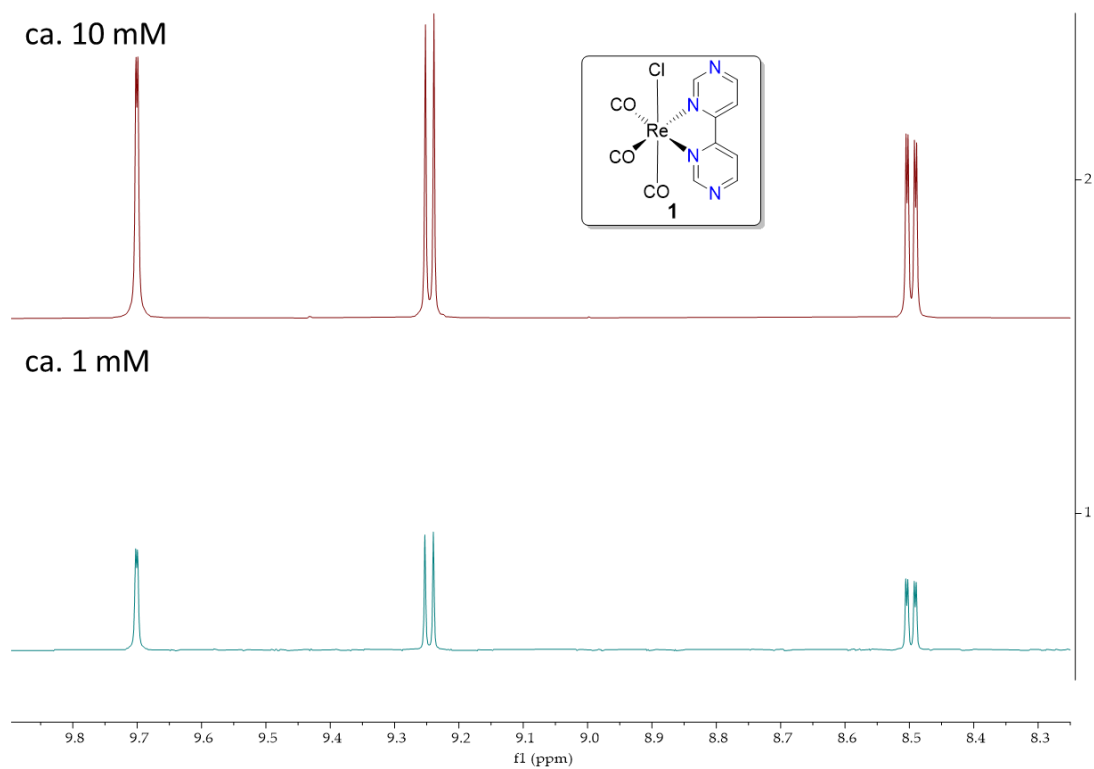

**Figure S18:** <sup>1</sup>H-NMR spectra (400 MHz, RT, CD<sub>3</sub>CN) of [Re(CO)<sub>3</sub>(bpm)Cl] (1) (1-10 mM).

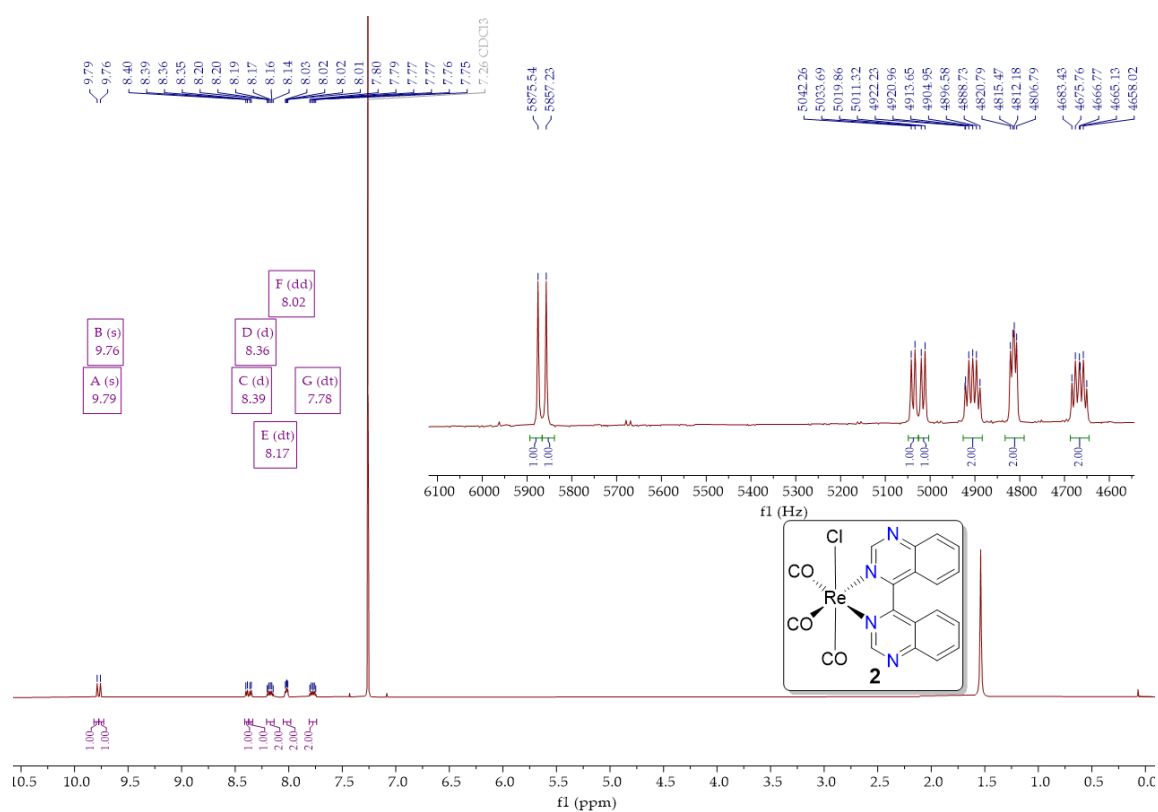

**Figure S19:**  $^1\text{H}$ -NMR spectrum (600 MHz, RT,  $\text{CDCl}_3$ ) of  $[\text{Re}(\text{CO})_3(\text{bqz})\text{Cl}]$  (**2**).

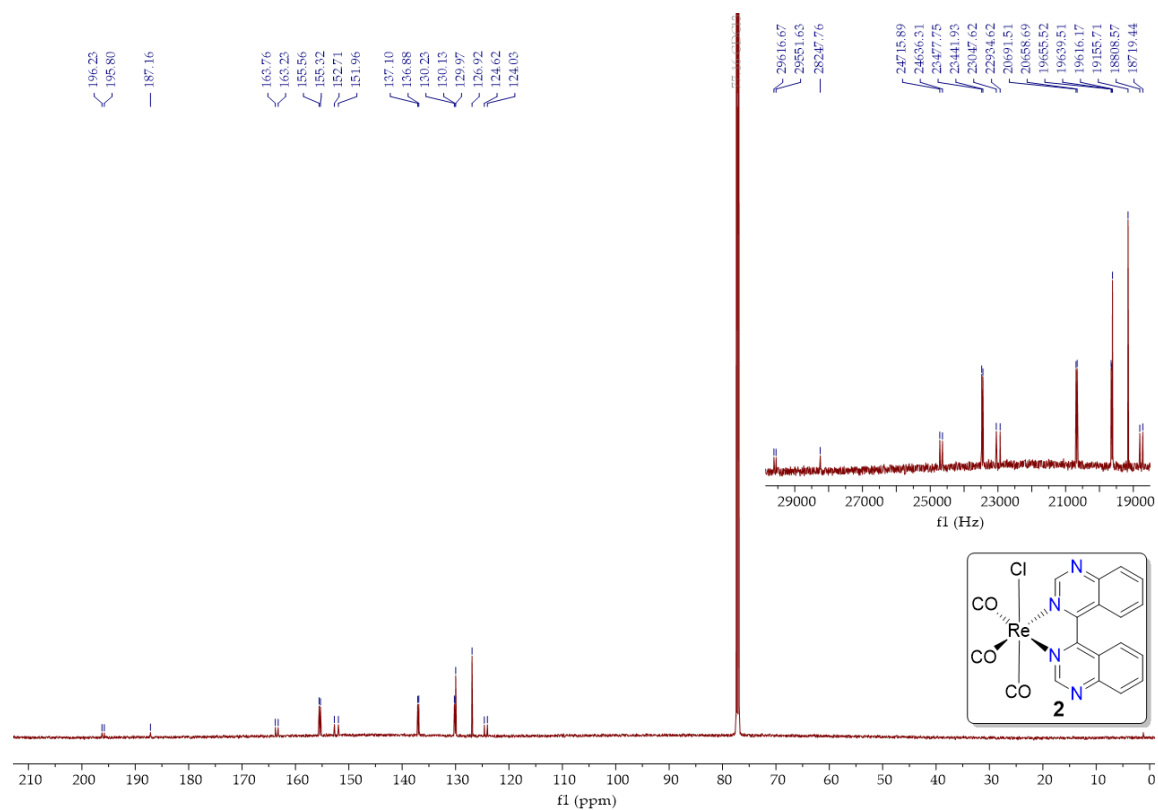

**Figure S20:**  $^{13}\text{C}$ -UDEFT-NMR spectrum (151 MHz, RT,  $\text{CDCl}_3$ ) of  $[\text{Re}(\text{CO})_3(\text{bqz})\text{Cl}]$  (**2**).

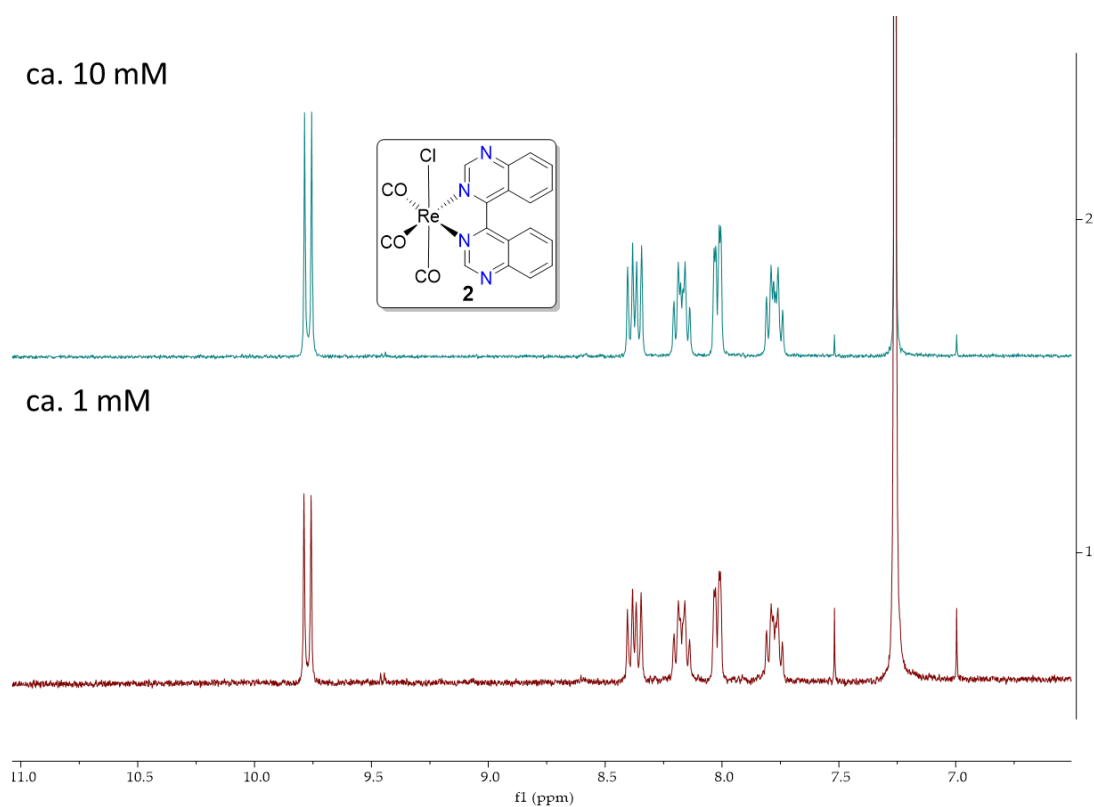

**Figure S21:**  $^1\text{H}$ -NMR spectra (400 MHz, RT,  $\text{CDCl}_3$ ) of  $[\text{Re}(\text{CO})_3(\text{bqz})\text{Cl}]$  (**2**) (1-10 mM).

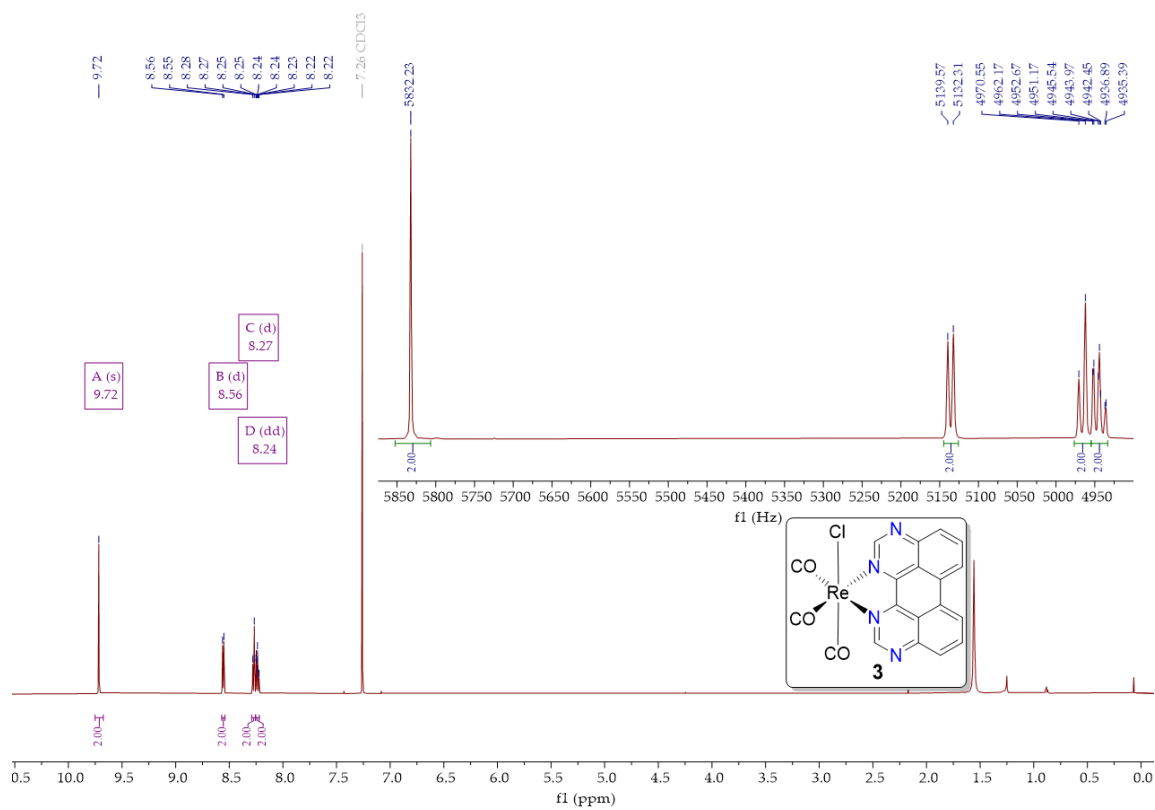

**Figure S22:**  $^1\text{H}$ -NMR spectrum (600 MHz, RT,  $\text{CDCl}_3$ ) of  $[\text{Re}(\text{CO})_3(1,3,10,12\text{-tape})\text{Cl}]$  (**3**).

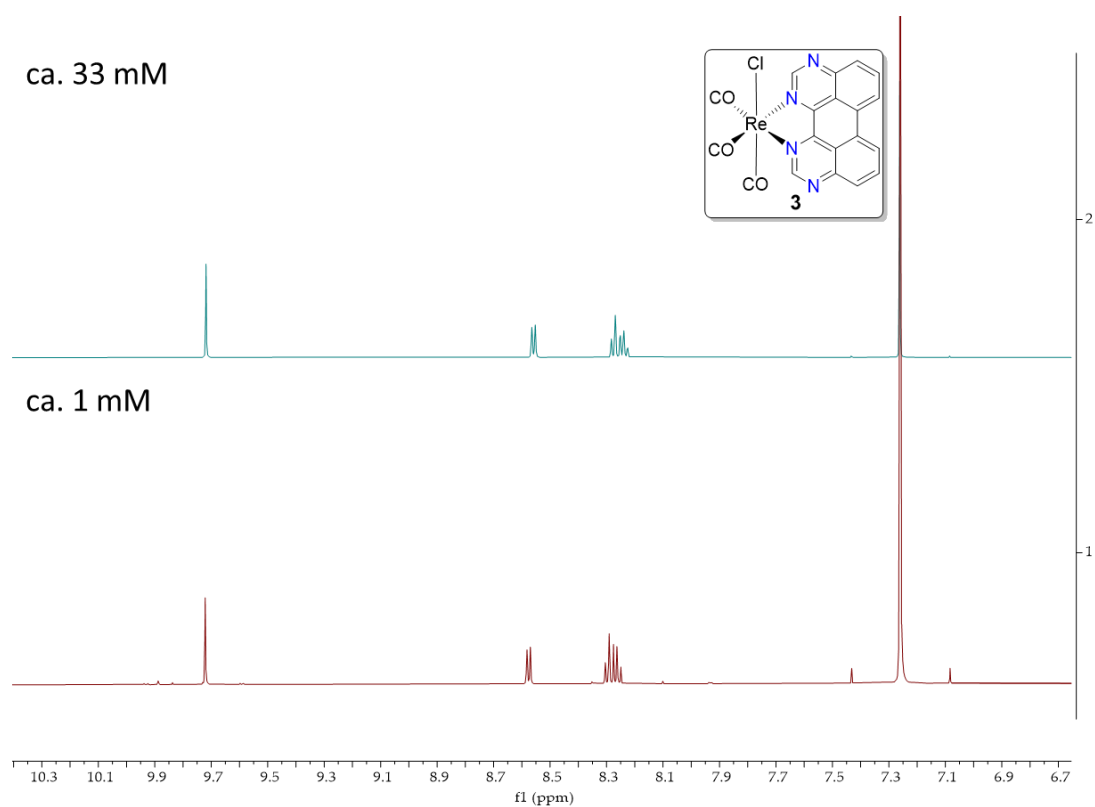

**Figure S23:**  $^1\text{H}$ -NMR spectra (600 MHz, RT,  $\text{CDCl}_3$ ) of  $[\text{Re}(\text{CO})_3(1,3,10,12\text{-tape})\text{Cl}]$  (**3**) (1-33 mM).

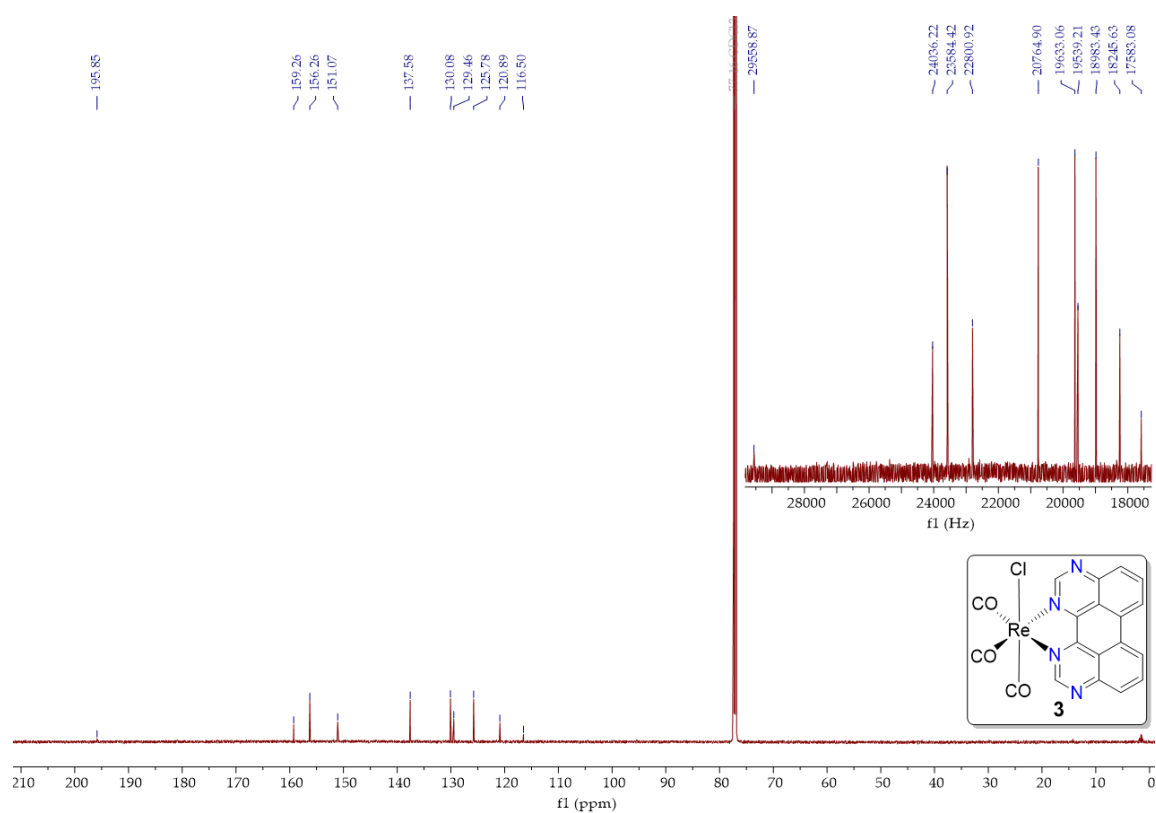

**Figure S24:**  $^{13}\text{C}$ -NMR spectrum (151 MHz, RT,  $\text{CDCl}_3$ ) of  $[\text{Re}(\text{CO})_3(1,3,10,12\text{-tape})\text{Cl}]$  (**3**).

## 2. High resolution mass spectra

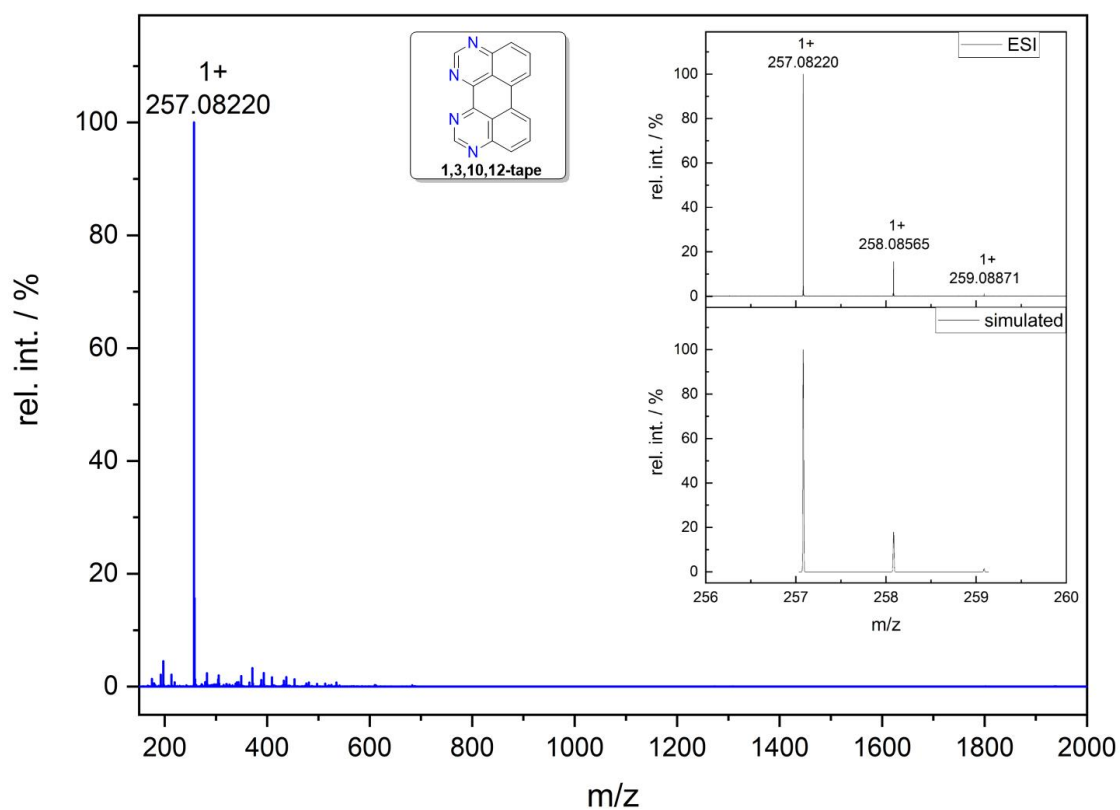

**Figure S25:** High-resolution ESI mass spectrum of ligand **1,3,10,12-tape** (measured from chloroform solution;  $M = [C_{16}H_8N_4]$ ; *calc. for*  $[M + H]^+ m/z = 257.08217$ ), the inset showing the zoomed experimental as well as the simulated isotopic pattern.

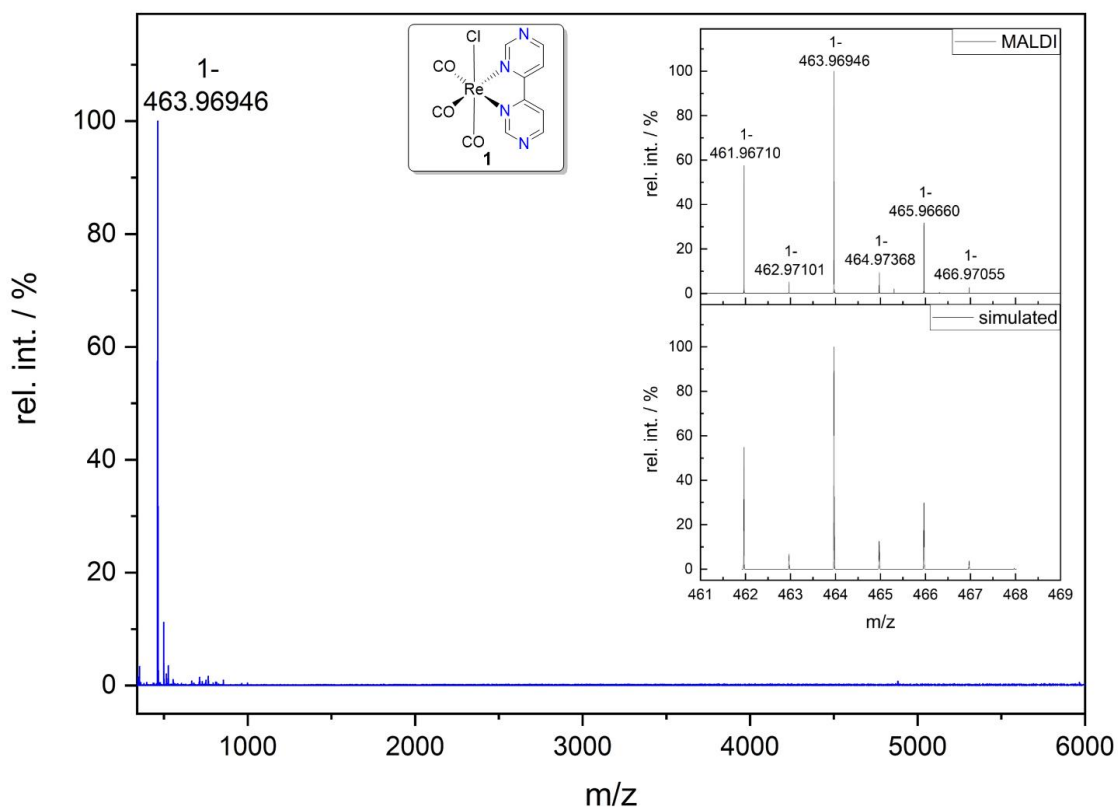

**Figure S26:** High-resolution MALDI mass spectrum of complex 1 (neg. mode, DCTB matrix;  $M = [C_{11}H_6ClN_4O_3Re]$ ; *calc. for*  $[M + e]^-$   $m/z = 463.96859$ ), the inset showing the zoomed experimental as well as the simulated isotopic pattern.

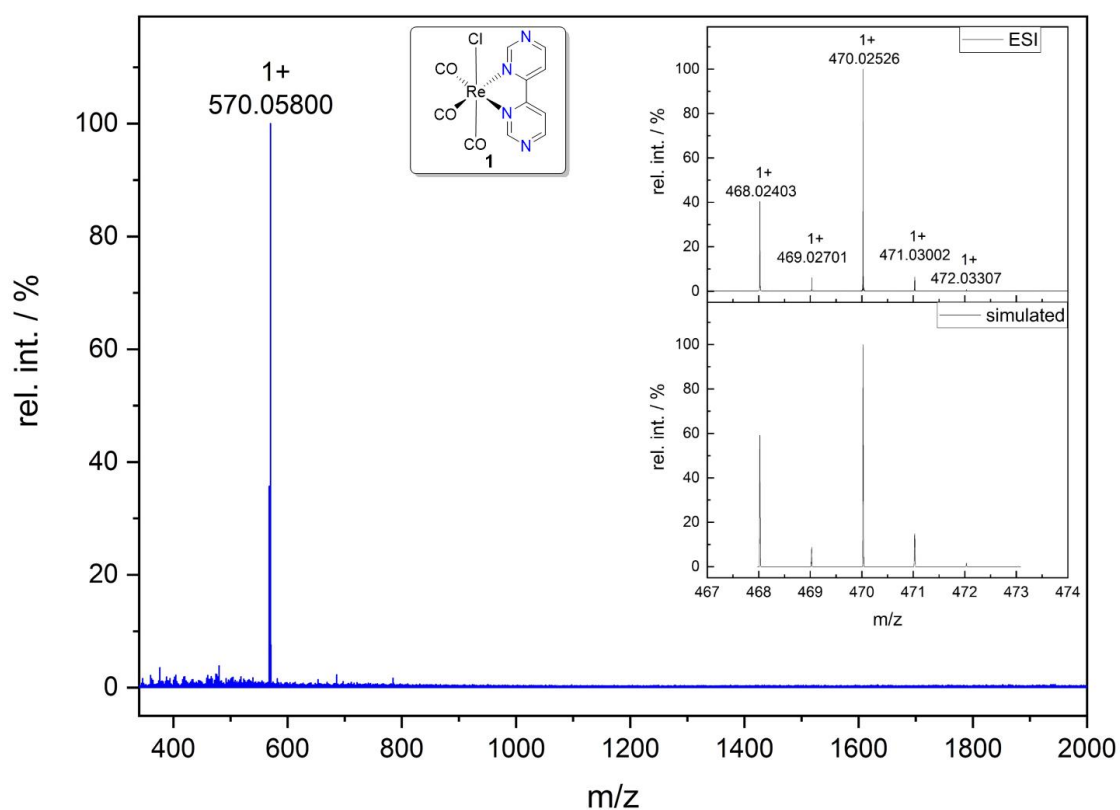

**Figure S27:** High-resolution ESI mass spectrum of complex **1** (measured from an acetonitrile solution;  $M = [C_{11}H_6ClN_4O_3Re]$ ; *calc. for*  $[M - Cl + MeCN]^+ m/z = 470.02629$ ), the inset showing the zoomed experimental as well as the simulated isotopic pattern.

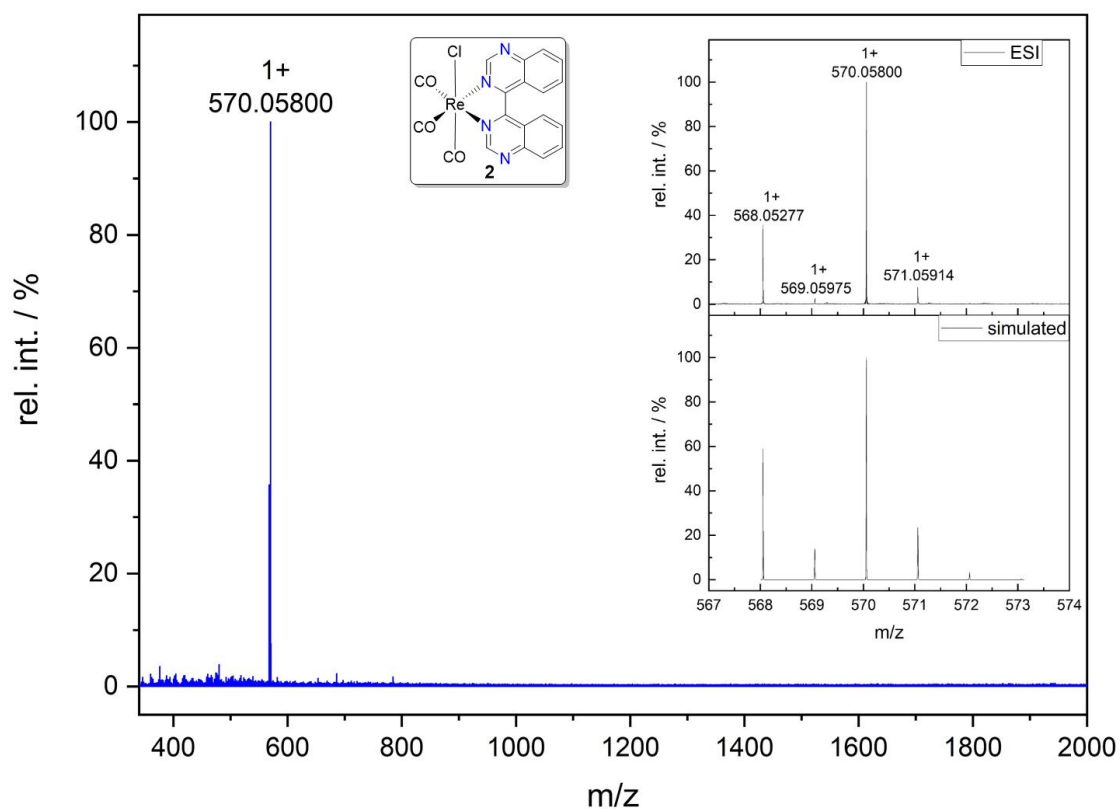

**Figure S28:** High-resolution ESI mass spectrum of complex 2 (measured from an acetonitrile solution;  $M = [C_{19}H_{10}ClN_4O_3Re]$ ; *calc. for*  $[M - Cl + MeCN]^+ m/z = 570.05759$ ), the inset showing the zoomed experimental as well as the simulated isotopic pattern.

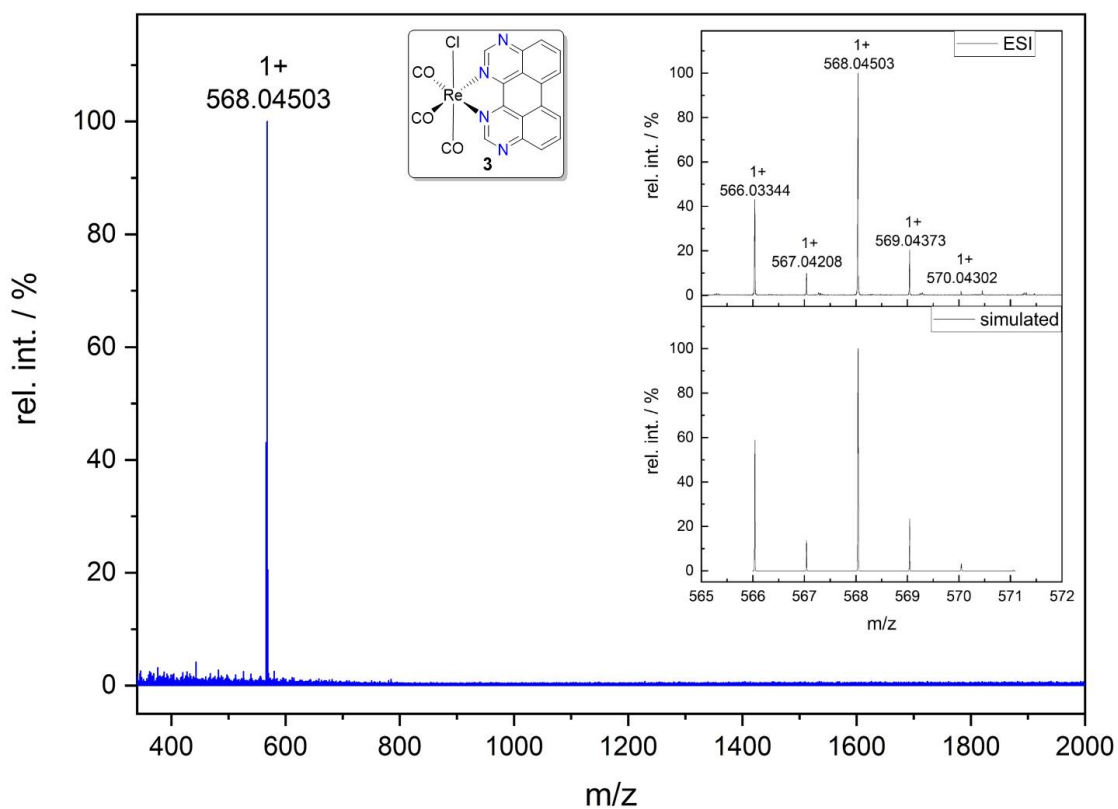

**Figure S29:** High-resolution ESI mass spectrum of complex **3** (measured from an acetonitrile solution;  $M = [C_{19}H_8ClN_4O_3Re]$ ; *calc. for*  $[M - Cl + MeCN]^+ m/z = 568.04194$ ), the inset showing the zoomed experimental as well as the simulated isotopic pattern.

### 3. ATR-IR transmission spectra

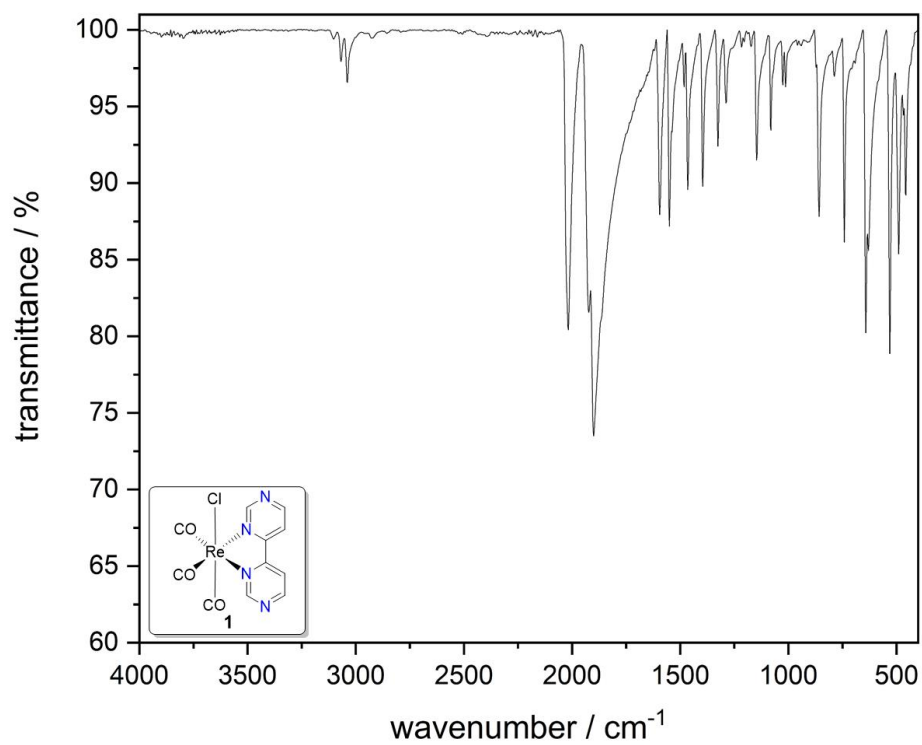

**Figure S30:** Solid-state ATR-IR transmission spectrum recorded for complex **1** in a range of 4000-400 cm<sup>-1</sup> with a resolution of 4 cm<sup>-1</sup>.

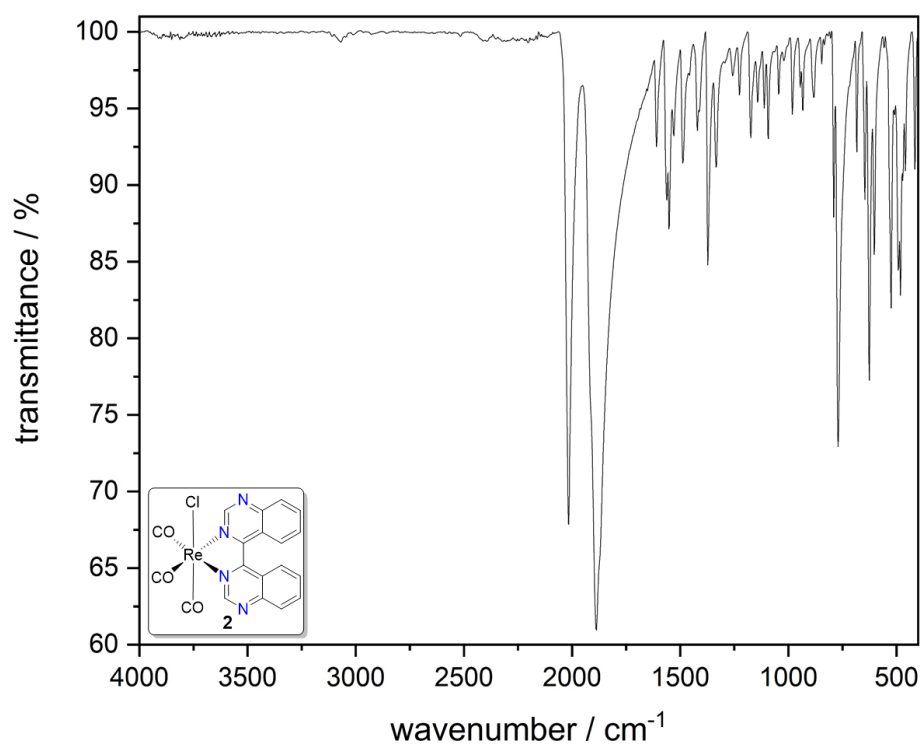

**Figure S31:** Solid-state ATR-IR transmission spectrum recorded for complex **2** in a range of 4000-400 cm<sup>-1</sup> with a resolution of 4 cm<sup>-1</sup>.

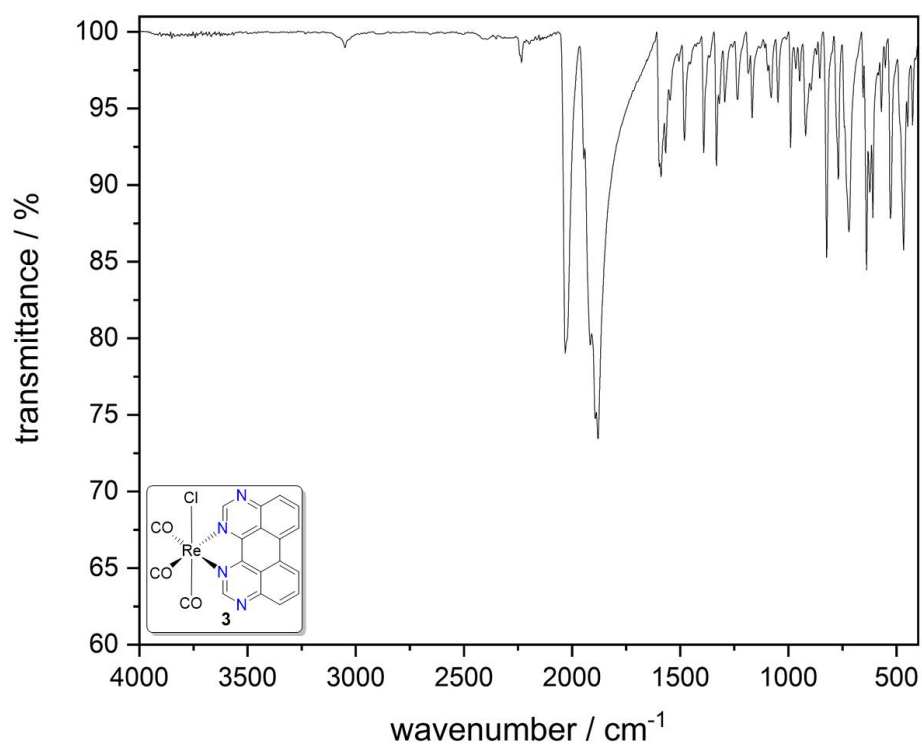

**Figure S32:** Solid-state ATR-IR transmission spectrum recorded for complex **3** in a range of 4000-400 cm<sup>-1</sup> with a resolution of 4 cm<sup>-1</sup>.

#### 4. Crystallographic information

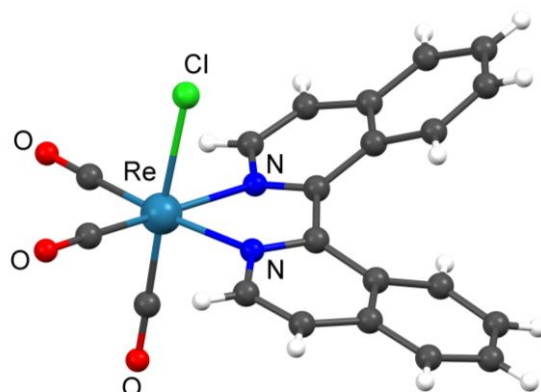

**Figure S33:** Molecular structure of the chloride tris(carbonyl) biquinoline rhenium(I) complex reported by Holdt *et al.*, reproduced from CSD entry 631826; ball-and-stick depiction created with Mercury 2020.2.0 (Build 290188).

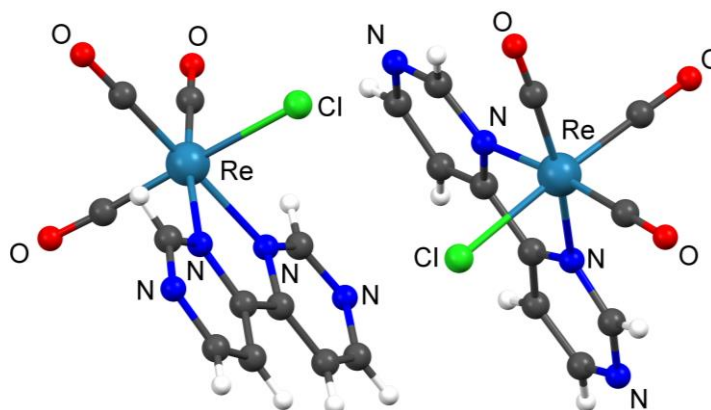

**Figure S34:** Molecular structure of **1** as determined by scXRD analysis; ball-and-stick depiction showing the asymmetric unit along the a-axis; created with Mercury 2020.2.0 (Build 290188).

**Table S1:** Angles characterizing the distortion of the bipyrimidine unit in Re complexes **1** and **3**.

|                                 | <b>1</b> | <b>3</b> |
|---------------------------------|----------|----------|
| $\angle(\text{N-C-N}) [^\circ]$ | 126.2(5) | 127.2(8) |
|                                 | 125.8(5) | 126.0(8) |
|                                 | 125.1(5) |          |
|                                 | 125.9(5) |          |
| $\angle(\text{C-N-C}) [^\circ]$ | 116.5(5) | 114.8(7) |
|                                 | 117.1(4) | 115.2(7) |
|                                 | 117.3(4) | 117.2(7) |
|                                 | 117.4(4) | 119.0(7) |
|                                 | 115.7(6) |          |
|                                 | 116.1(5) |          |
|                                 | 116.9(5) |          |
|                                 | 116.5(5) |          |

**Table S2:** Bond distances in the coordination sphere of Re complexes **1** and **3** in comparison those of the published structure of [Re(CO)<sub>3</sub>(1,1'-bisisoquinoline)Cl] by Holdt (ref. [6]).

|              | 1        | CSD entry 631826 | 3        |
|--------------|----------|------------------|----------|
| d(Re-Cl) [Å] | 2.469(1) | 2.503(2)         | 2.475(2) |
|              | 2.475(1) |                  |          |
| d(Re-CO) [Å] | 1.914(6) | 1.921(7)         | 1.923(8) |
|              | 1.915(6) | 1.924(8)         | 1.912(9) |
|              | 1.913(5) |                  |          |
|              | 1.900(6) |                  |          |
|              | 1.908(4) | 1.907(7)         | 1.901(9) |
|              | 1.923(6) |                  |          |
| d(Re-N) [Å]  | 2.181(4) | 2.200(5)         | 2.180(7) |
|              | 2.176(4) | 2.180(5)         | 2.158(6) |

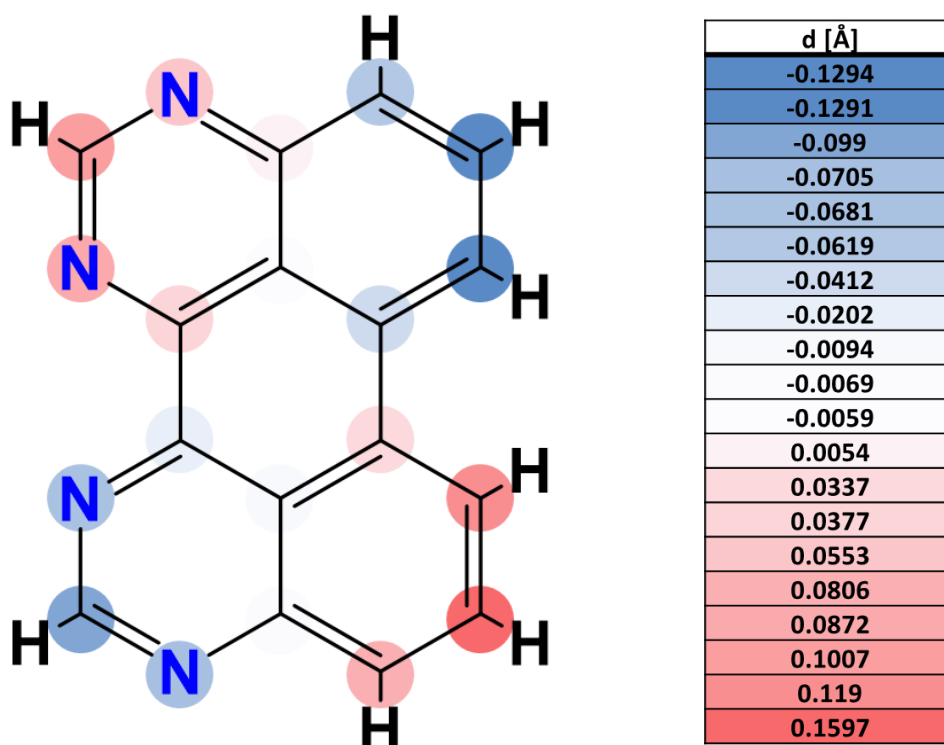

**Figure S35:** Illustration of deviations of individual atoms of the **1,3,10,12-tape** ligand in **3** from the respective calculated mean plane; values determined with the Diamond Version 4.6.8 Software.

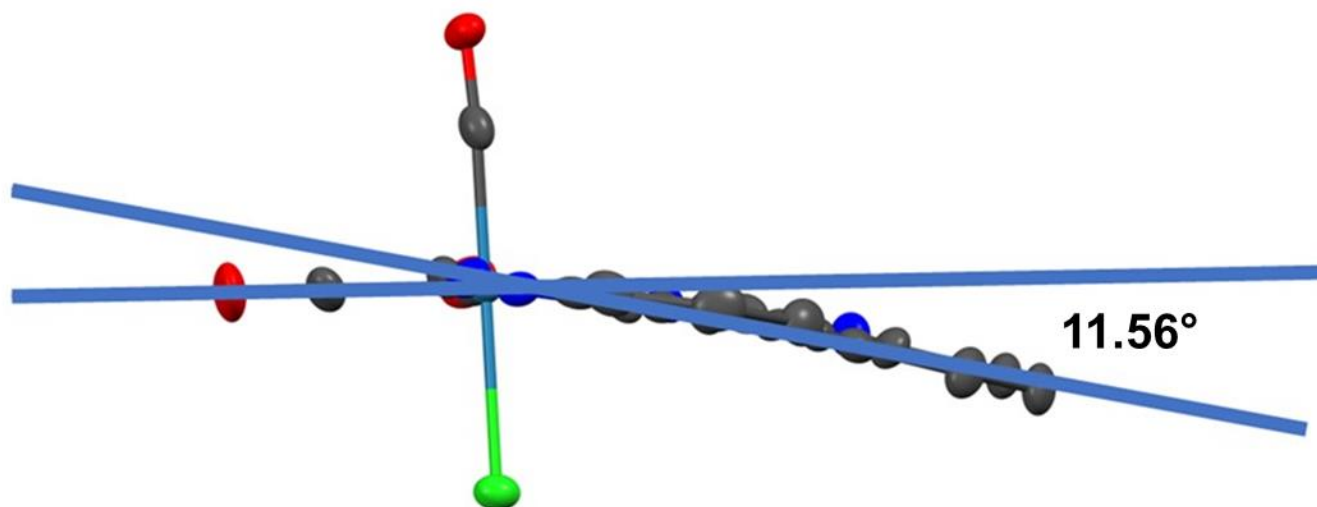

**Figure S36:** Ball-and-stick depiction of **3**·CHCl<sub>3</sub> as determined by scXRD, highlighting the 11.56° tilt observed in the crystal structure of **3** as defined by the plane of the **1,3,10,12-tape** ligand *vs.* the plane of the Re center and the two CO-ligands *trans* to **1,3,10,12-tape**; protons and solvent molecule omitted for clarity; created with Mercury 2020.2.0 (Build 290188).

**Table S3:** Crystal data and structure refinement for **1** (CCDC #2225447). Crystals were obtained by slow diffusion of *n*-hexane into a concentrated chloroform solution.

|                                             |                                                                   |
|---------------------------------------------|-------------------------------------------------------------------|
| Identification code                         | <b>1</b> , CCDC #2225447                                          |
| Empirical formula                           | C <sub>11</sub> H <sub>6</sub> ClN <sub>4</sub> O <sub>3</sub> Re |
| Formula weight                              | 463.85                                                            |
| Temperature/K                               | 150.0                                                             |
| Crystal system                              | triclinic                                                         |
| Space group                                 | P-1                                                               |
| a/Å                                         | 7.8191(3)                                                         |
| b/Å                                         | 7.9719(3)                                                         |
| c/Å                                         | 21.5105(9)                                                        |
| α/°                                         | 80.661(2)                                                         |
| β/°                                         | 84.045(2)                                                         |
| γ/°                                         | 89.498(2)                                                         |
| Volume/Å <sup>3</sup>                       | 1315.86(9)                                                        |
| Z                                           | 4                                                                 |
| ρ <sub>calc</sub> /cm <sup>3</sup>          | 2.341                                                             |
| μ/mm <sup>-1</sup>                          | 9.449                                                             |
| F(000)                                      | 864.0                                                             |
| Crystal size/mm <sup>3</sup>                | 0.309 × 0.224 × 0.22                                              |
| Radiation                                   | MoKα (λ = 0.71073)                                                |
| 2θ range for data collection/°              | 3.858 to 55.002                                                   |
| Index ranges                                | -10 ≤ h ≤ 10, -10 ≤ k ≤ 10, -27 ≤ l ≤ 27                          |
| Reflections collected                       | 27494                                                             |
| Independent reflections                     | 6037 [R <sub>int</sub> = 0.0740, R <sub>sigma</sub> = 0.0577]     |
| Data/restraints/parameters                  | 6037/0/361                                                        |
| Goodness-of-fit on F <sup>2</sup>           | 1.095                                                             |
| Final R indexes [I ≥ 2σ (I)]                | R <sub>1</sub> = 0.0343, wR <sub>2</sub> = 0.0878                 |
| Final R indexes [all data]                  | R <sub>1</sub> = 0.0370, wR <sub>2</sub> = 0.0893                 |
| Largest diff. peak/hole / e Å <sup>-3</sup> | 2.61/-2.28                                                        |



**Table S4:** Crystal data and structure refinement for **3** (CCDC #2225446). Crystals were obtained by slow diffusion of *n*-hexane into a concentrated chloroform solution.

|                                                              |                                                                                 |
|--------------------------------------------------------------|---------------------------------------------------------------------------------|
| Identification code                                          | <b>3</b> , CCDC #2225446                                                        |
| Empirical formula                                            | C <sub>20</sub> H <sub>9</sub> Cl <sub>4</sub> N <sub>4</sub> O <sub>3</sub> Re |
| Formula weight                                               | 681.31                                                                          |
| Temperature/K                                                | 150.0                                                                           |
| Crystal system                                               | monoclinic                                                                      |
| Space group                                                  | P2 <sub>1</sub> /c                                                              |
| <i>a</i> /Å                                                  | 6.2686(4)                                                                       |
| <i>b</i> /Å                                                  | 18.5609(13)                                                                     |
| <i>c</i> /Å                                                  | 18.7584(13)                                                                     |
| $\alpha$ /°                                                  | 90                                                                              |
| $\beta$ /°                                                   | 99.606(3)                                                                       |
| $\gamma$ /°                                                  | 90                                                                              |
| Volume/Å <sup>3</sup>                                        | 2152.0(3)                                                                       |
| <i>Z</i>                                                     | 4                                                                               |
| $\rho_{\text{calc}}$ /cm <sup>3</sup>                        | 2.103                                                                           |
| $\mu$ /mm <sup>-1</sup>                                      | 6.176                                                                           |
| <i>F</i> (000)                                               | 1296.0                                                                          |
| Crystal size/mm <sup>3</sup>                                 | 0.103 × 0.079 × 0.078                                                           |
| Radiation                                                    | MoK $\alpha$ ( $\lambda$ = 0.71073)                                             |
| 2 $\Theta$ range for data collection/°                       | 4.388 to 55.248                                                                 |
| Index ranges                                                 | -8 ≤ <i>h</i> ≤ 8, -24 ≤ <i>k</i> ≤ 23, -24 ≤ <i>l</i> ≤ 24                     |
| Reflections collected                                        | 33758                                                                           |
| Independent reflections                                      | 4971 [ <i>R</i> <sub>int</sub> = 0.1610, <i>R</i> <sub>sigma</sub> = 0.0897]    |
| Data/restraints/parameters                                   | 4971/0/289                                                                      |
| Goodness-of-fit on <i>F</i> <sup>2</sup>                     | 1.033                                                                           |
| Final <i>R</i> indexes [ <i>I</i> ≥ 2 $\sigma$ ( <i>I</i> )] | <i>R</i> <sub>1</sub> = 0.0503, <i>wR</i> <sub>2</sub> = 0.1224                 |
| Final <i>R</i> indexes [all data]                            | <i>R</i> <sub>1</sub> = 0.0726, <i>wR</i> <sub>2</sub> = 0.1363                 |
| Largest diff. peak/hole / e Å <sup>-3</sup>                  | 2.01/-1.54                                                                      |

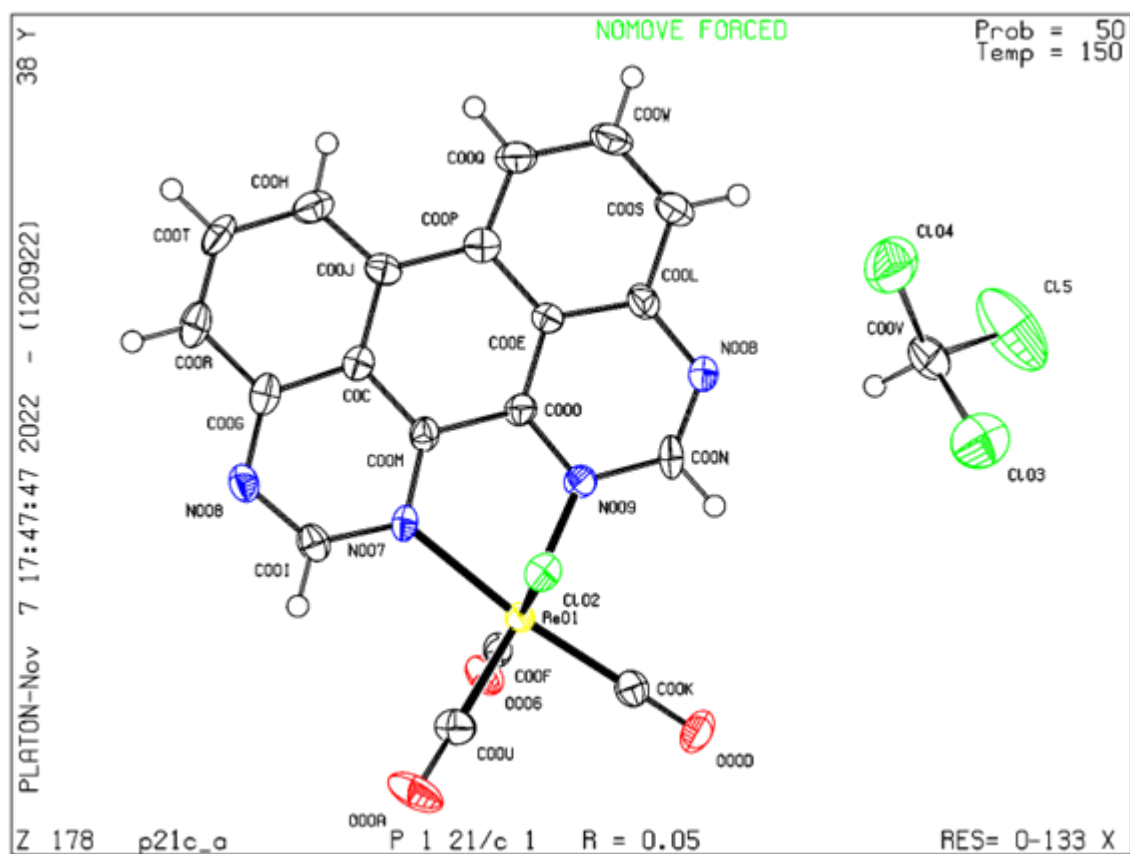

**Figure S38:** ORTEP depiction of 3; the ellipsoids are drawn at the 50% probability level. H-atoms were added at fixed positions.

## 5. Electrochemical characterization

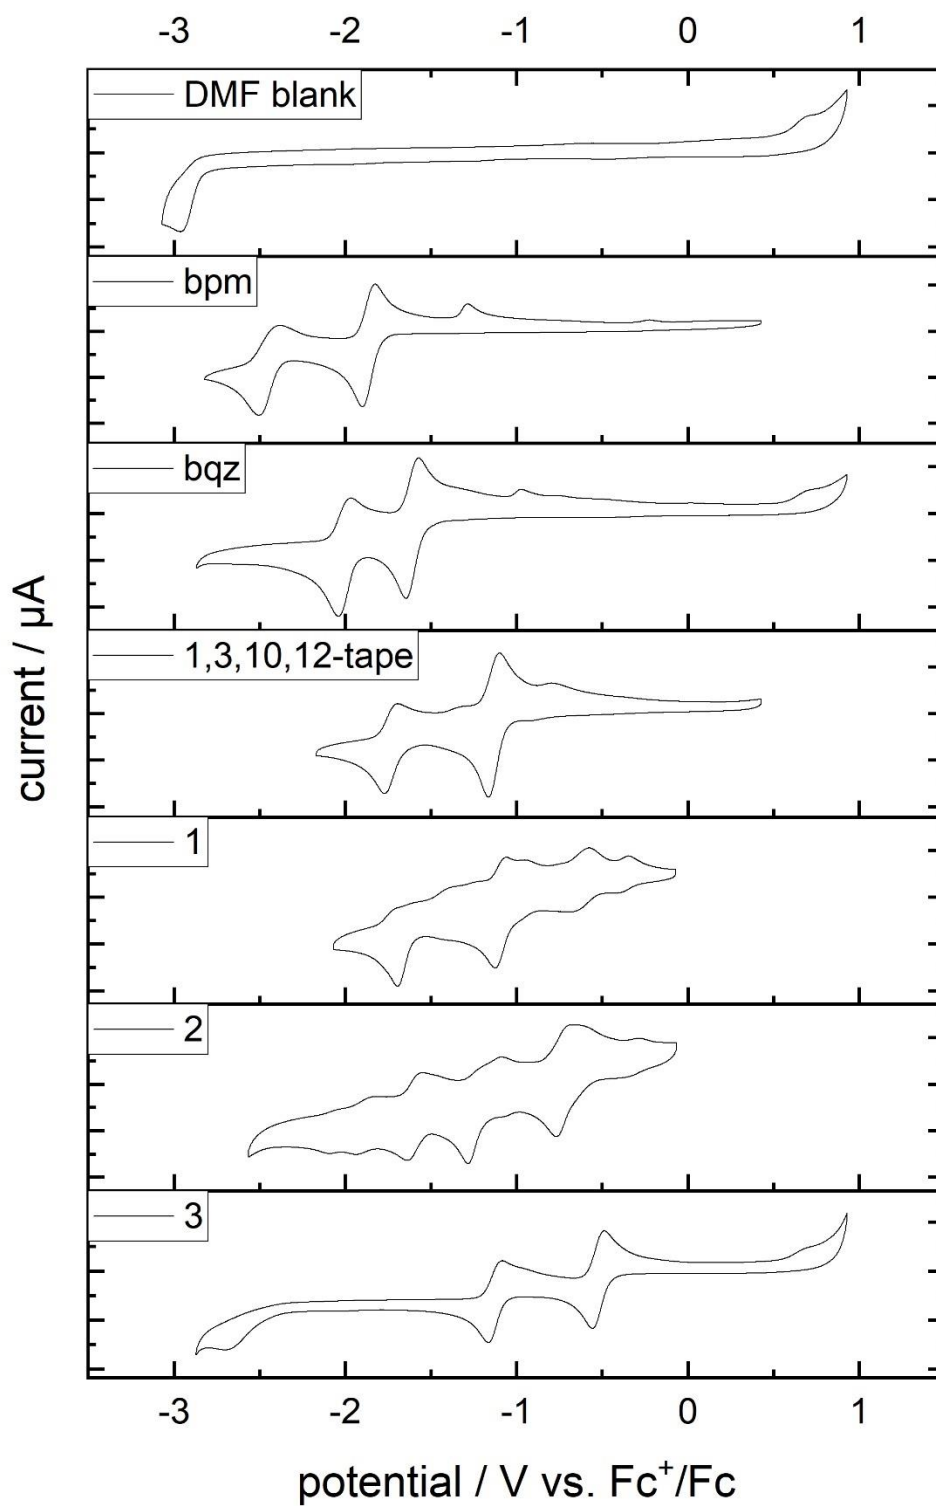

**Figure S39:** Cyclic voltammograms of ligands and complexes showing all observed reductions. (DMF, 0.1 M  $n\text{Bu}_4\text{NPF}_6$  supporting electrolyte, 1 mM analyte,  $100\text{ mV s}^{-1}$ , GC-WE, Pt-wire CE, non-aqueous  $\text{AgNO}_3/\text{Ag-RE}$  (0.1 M  $n\text{Bu}_4\text{NPF}_6$  / 0.01 mM  $\text{AgNO}_3$  in MeCN), referenced against  $\text{Fc}^+/\text{Fc}$ ).

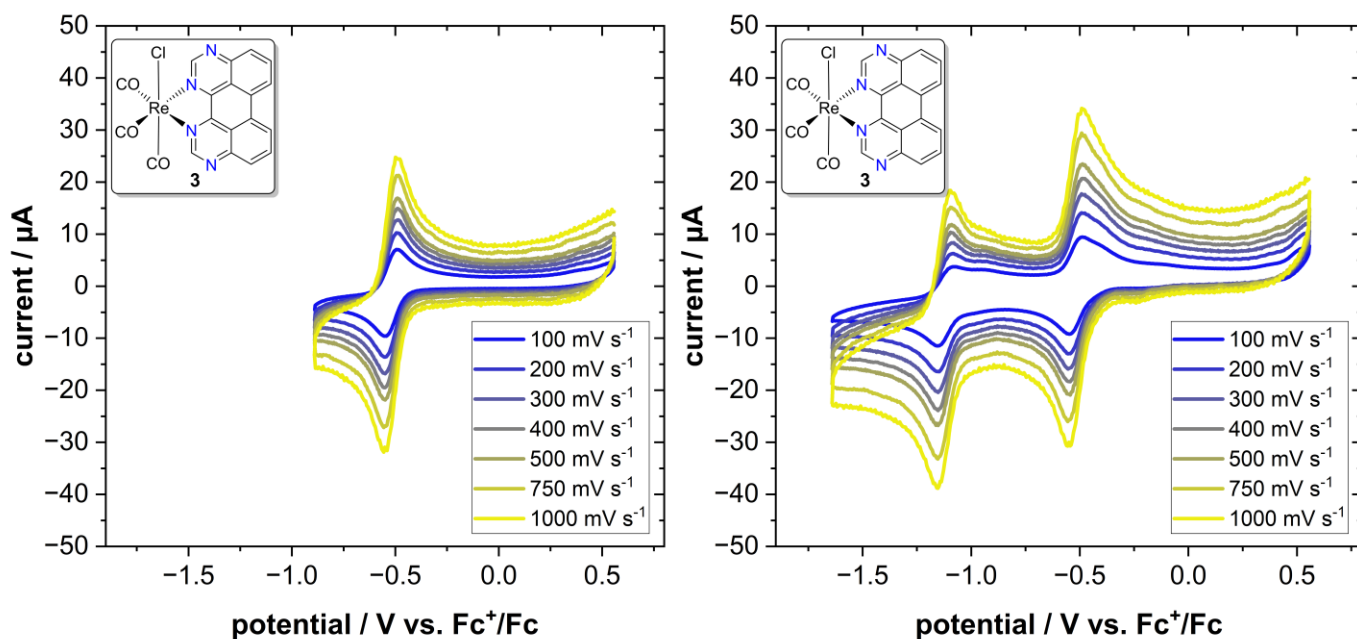

**Figure S40:** Cyclic voltammograms of complex **3** showing left) the first and right) the first and second reductions at variable scan rates. (DMF, 0.1 M *n*Bu<sub>4</sub>NPF<sub>6</sub> supporting electrolyte, 1 mM **3**, GC-WE, Pt-wire CE, non-aqueous Ag-wire pseudo-RE (0.1 M *n*Bu<sub>4</sub>NPF<sub>6</sub> in DMF), referenced against Fc<sup>+</sup>/Fc).

## 6. UV/Vis-NIR absorption and emission spectra

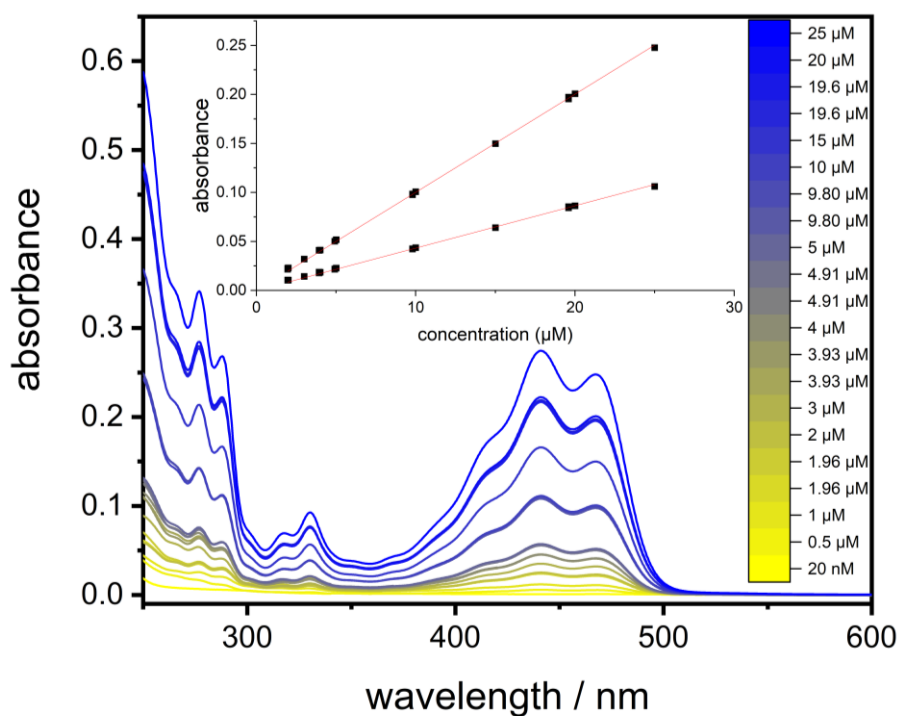

**Figure S41:** UV-vis absorption spectra of 1,3,10,12-tape in CHCl<sub>3</sub> at concentrations from 20 nM to 25 μM. Inset shows absorbance vs. concentration plot and least-squares best-fit lines at wavelengths of 440.5 and 468.0 nm, respectively.

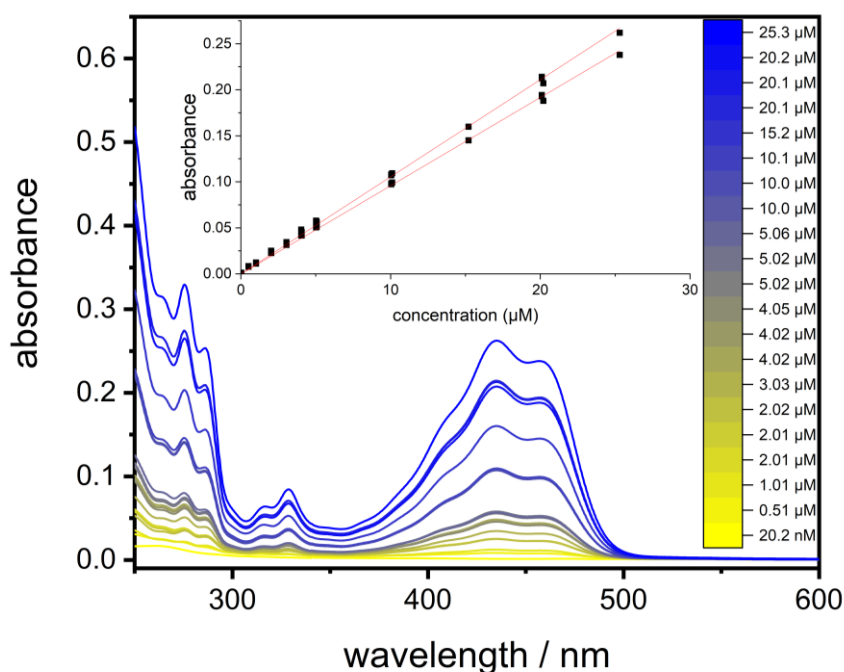

**Figure S42:** UV-vis absorption spectra of 1,3,10,12-tape in  $\text{CH}_3\text{CN}$  at concentrations from 20 nM to 25  $\mu\text{M}$ . Inset shows absorbance vs. concentration plot and least-squares best-fit lines at wavelengths of 434.0 and 457.5 nm, respectively.

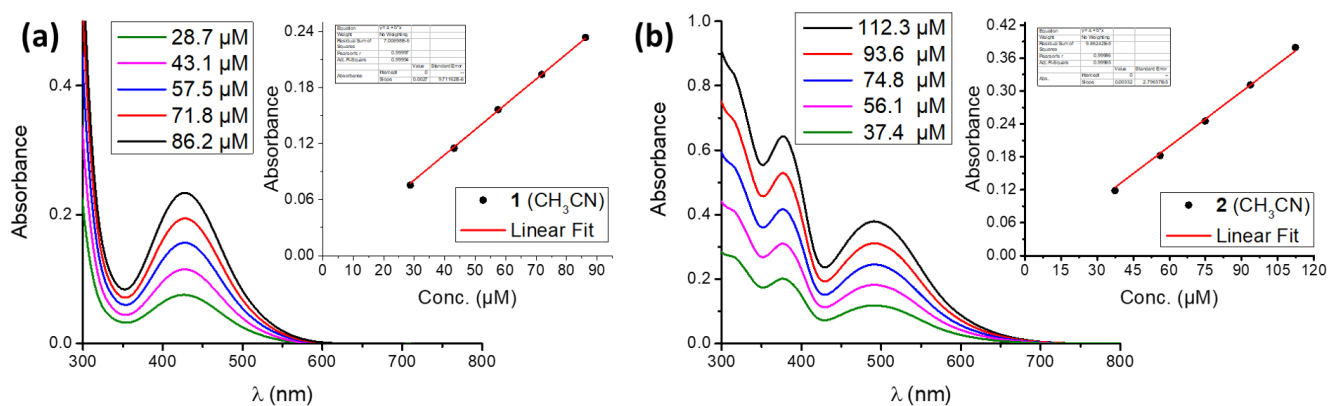

**Figure S43:** UV-vis absorption spectra of complex (a) **1** and (b) **2** in  $\text{CH}_3\text{CN}$  at their various concentrations. Inset shows absorbance vs. concentration plots and least-squares best-fit lines at wavelengths of 427 nm, and 491 nm, respectively.

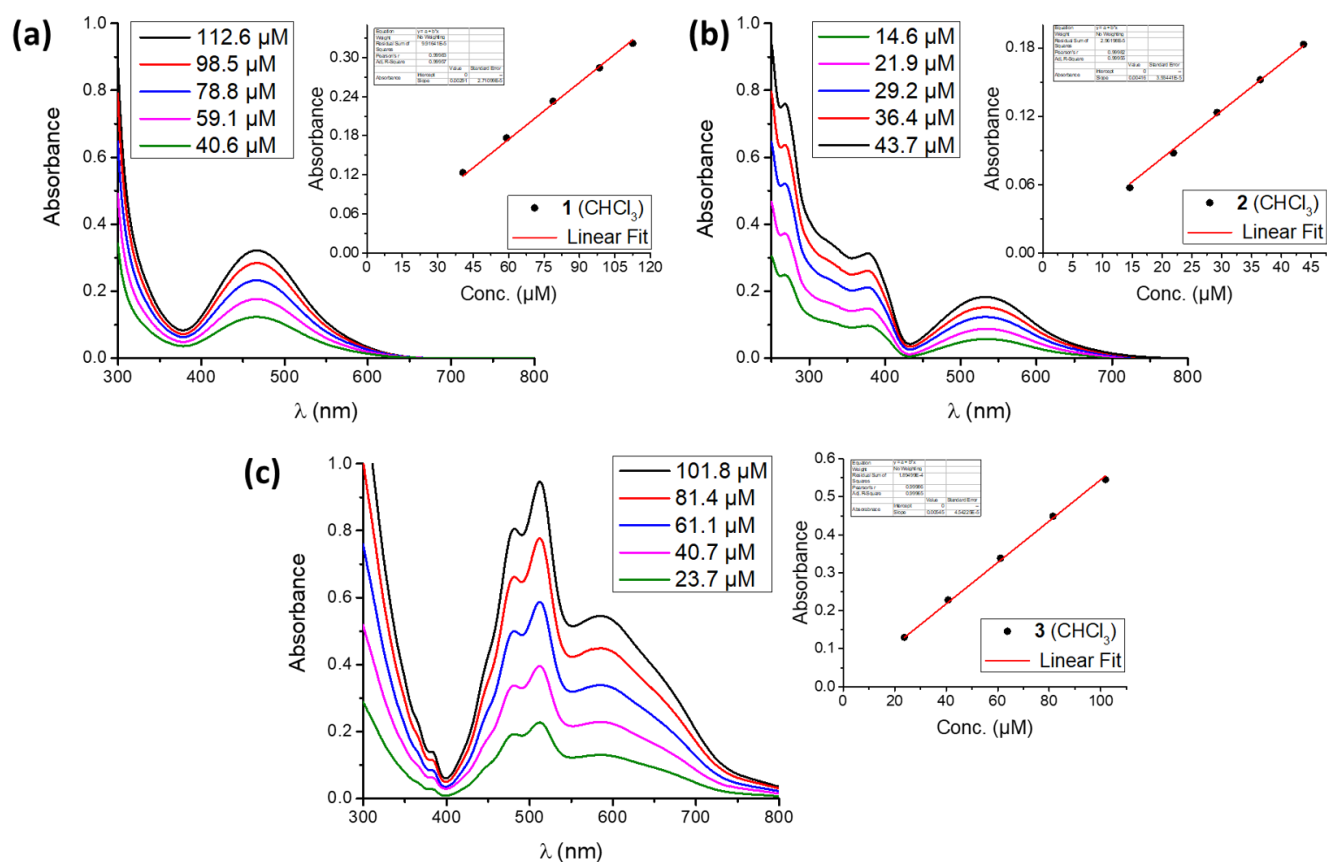

**Figure S44:** UV-vis absorption spectra of complex (a) **1**, (b) **2** and (c) **3** in  $\text{CHCl}_3$  at their various concentrations. Inset shows absorbance *vs* concentration plots and least-squares best-fit lines at wavelengths of 467 nm, 532 nm, and 586 nm, respectively.

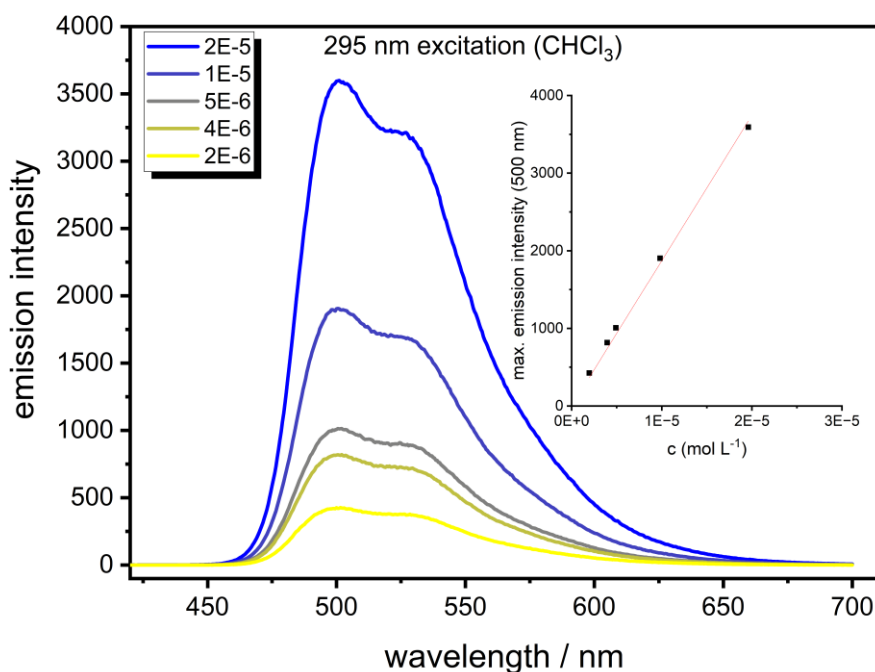

**Figure S45:** Luminescence spectra of **1,3,10,12-tape** in chloroform solution at different concentrations (see legend) upon excitation at 295 nm with the inset showing the maximum emission intensity *vs* concentration and least-square best-fit line.

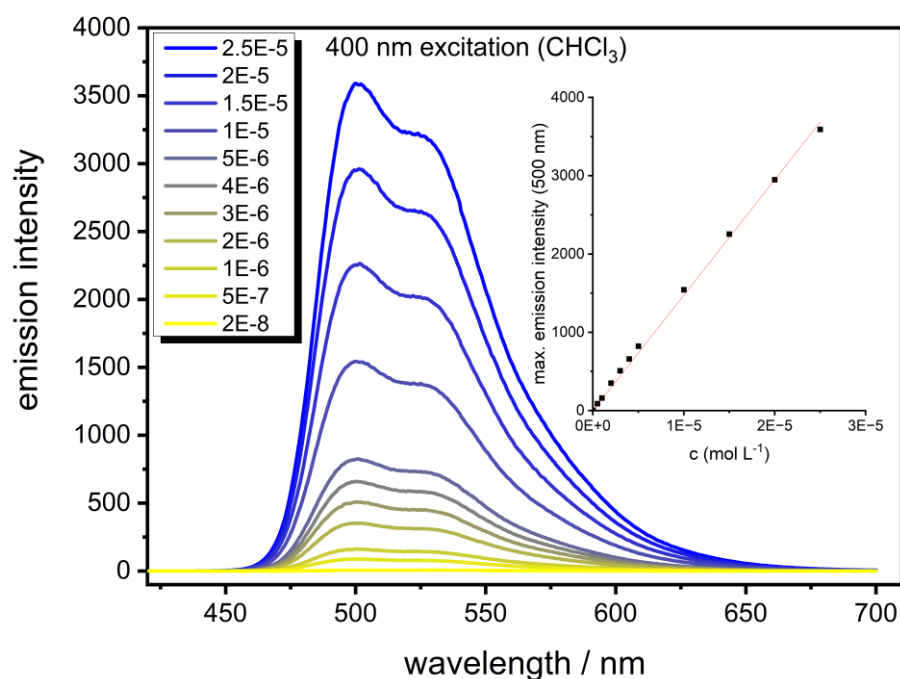

**Figure S46:** Luminescence spectra of **1,3,10,12-tape** in chloroform solution at different concentrations (see legend) upon excitation at 400 nm with the inset showing the maximum emission intensity *vs.* concentration and least-square best-fit line.

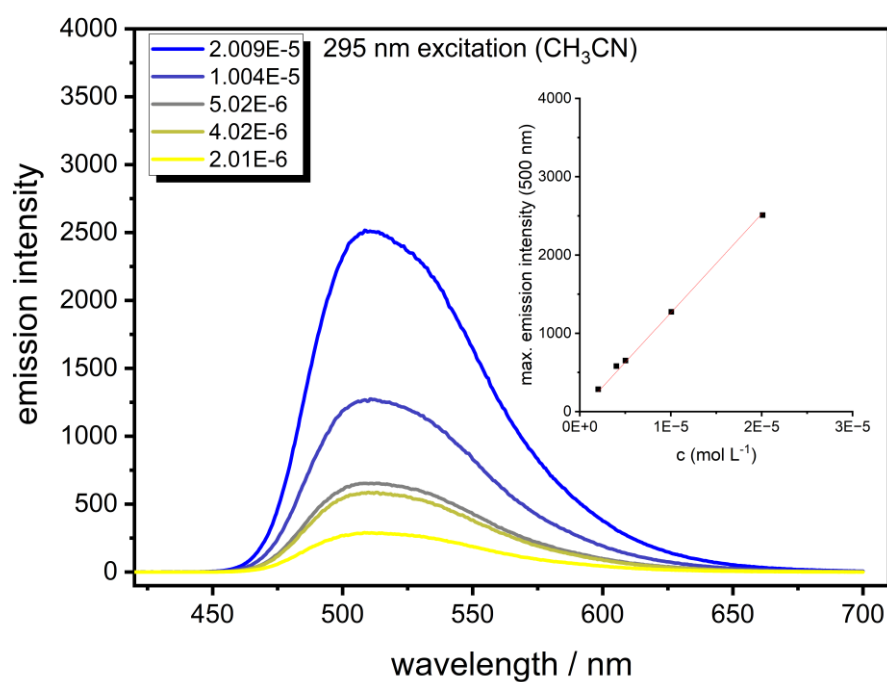

**Figure S47:** Luminescence spectra of **1,3,10,12-tape** in acetonitrile solution at different concentrations (see legend) upon excitation at 295 nm with the inset showing the maximum emission intensity *vs.* concentration and least-square best-fit line.

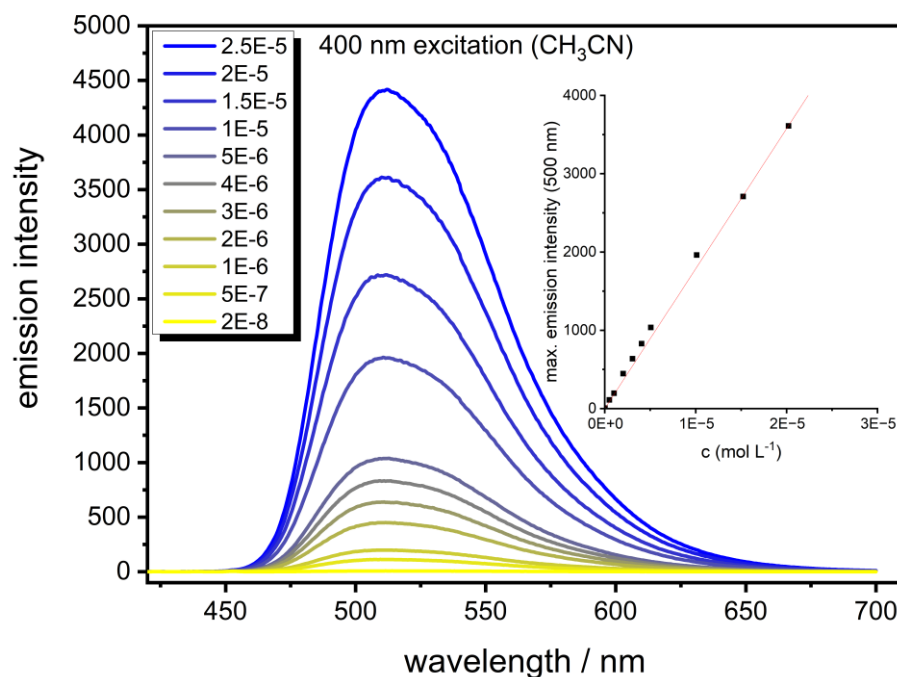

**Figure S48:** Luminescence spectra of **1,3,10,12-tape** in acetonitrile solution at different concentrations (see legend) upon excitation at 400 nm with the inset showing the maximum emission intensity *vs.* concentration and least-square best-fit line.

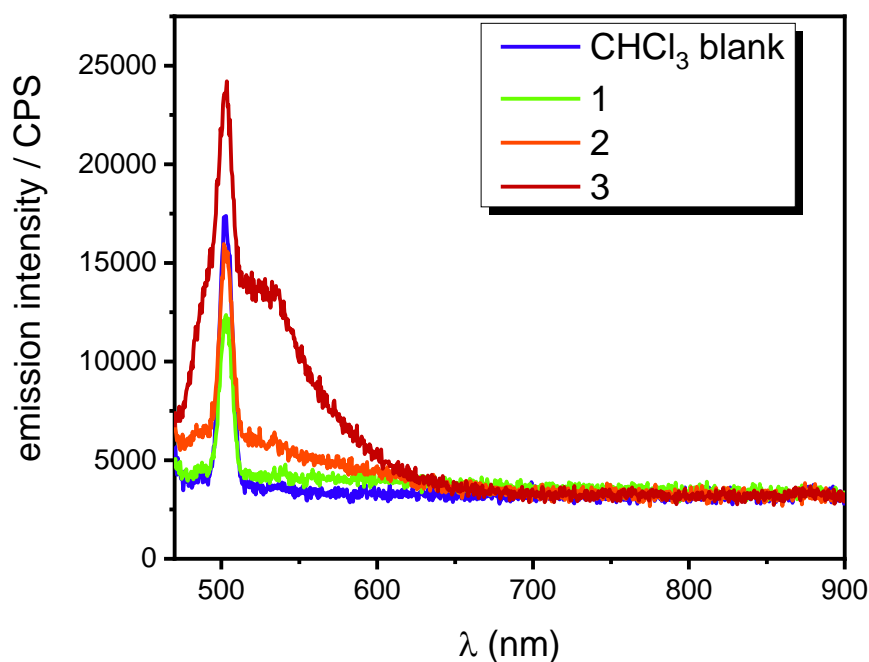

**Figure S49:** Uncorrected luminescence spectra of  $[\text{Re}(\text{CO})_3(\text{NN})\text{Cl}]$  complexes **1-3** in air-saturated chloroform with optical densities of 0.1 at the excitation wavelength of 436 nm. No complex emission was observed, however for complex **3** traces of the free azaperylene ligand are observed in emission spectroscopy. Neither a wider bandpass, removal of oxygen, change of solvent to THF, nor increasing the integration time led to the observation of complex emission at room temperature.

## 6. UV-Vis-NIR spectroelectrochemical measurements

In the following, the UV-Vis-NIR spectral progressions of ligand **1,3,10,12-tape** and complexes **1-3** are shown. Note that the cyclic voltammograms given as inset were measured using a glassy carbon WE, a Pt-wire CE and a non-aqueous  $\text{AgNO}_3/\text{Ag}$  pseudo-RE, whereas spectroelectrochemical measurements were performed using a Pine honeycomb screen-printed platinum electrode as WE and CE and an Ag-wire pseudo-RE as described in detail in the experimental part. The CVs shown were taken from the last scan (segments 8/9), where additional peaks had appeared.

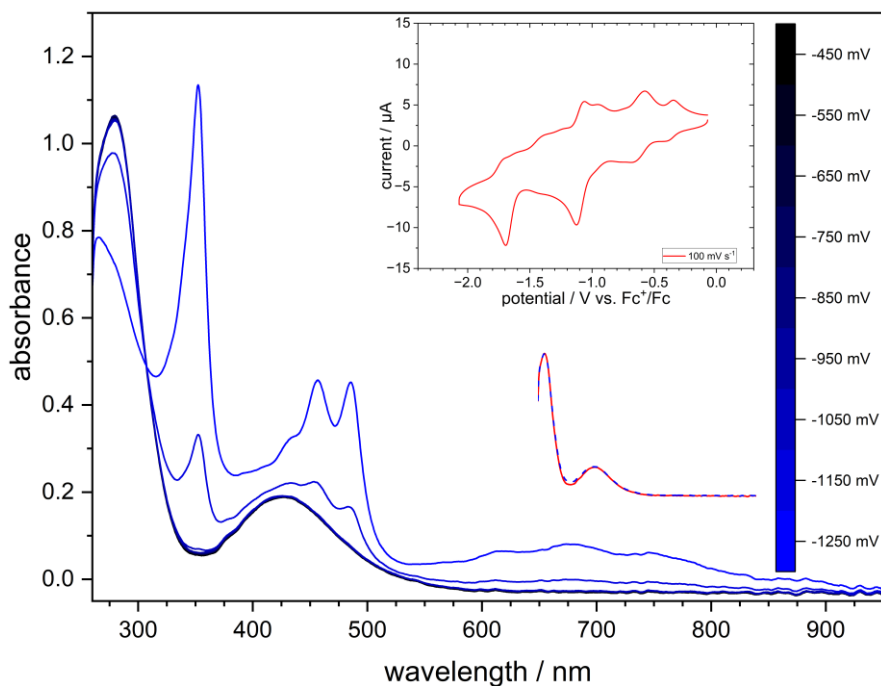

**Figure S50:** UV-Vis-NIR spectra obtained during spectroelectrochemical first reduction of complex **1** (0.5 mM) in dry, deaerated DMF containing 0.1 M  $n\text{Bu}_4\text{PF}_6$ , 90-180 s equilibrated potentials are given in V vs.  $\text{Fc}^+/\text{Fc}$ , the insets showing the cyclic voltammogram and the spectra obtained before electrolysis and after reversed electrolysis (-450 mV).

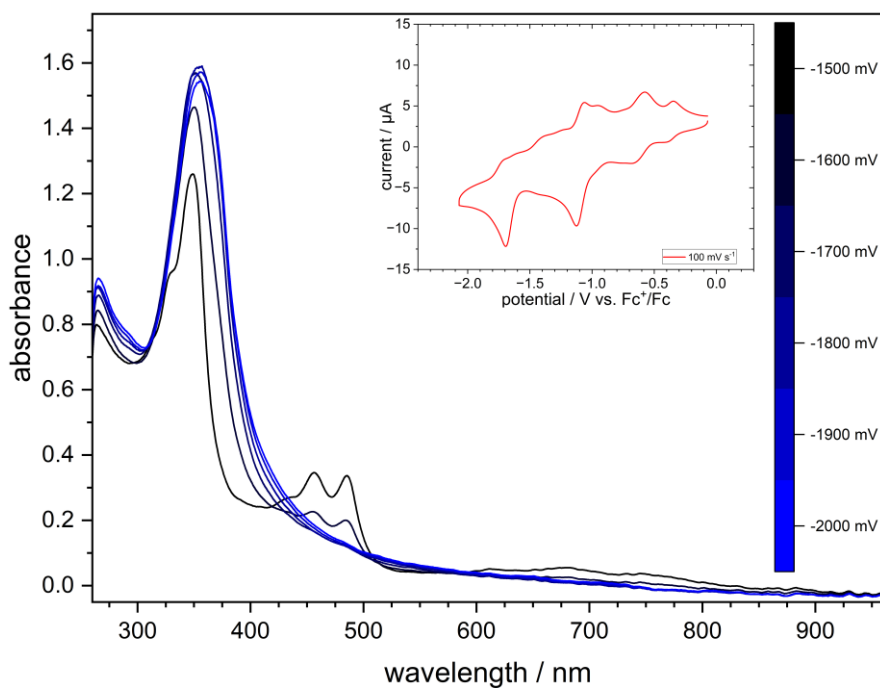

**Figure S51:** UV-Vis-NIR spectra obtained during spectroelectrochemical second reduction of complex 1 (0.5 mM) in dry, deaerated DMF containing 0.1 M  $n\text{Bu}_4\text{PF}_6$ , 90-180 s equilibrated potentials are given in V vs.  $\text{Fc}^+/\text{Fc}$ , the inset showing the cyclic voltammogram. The original spectrum could not be regained after reversed electrolysis.

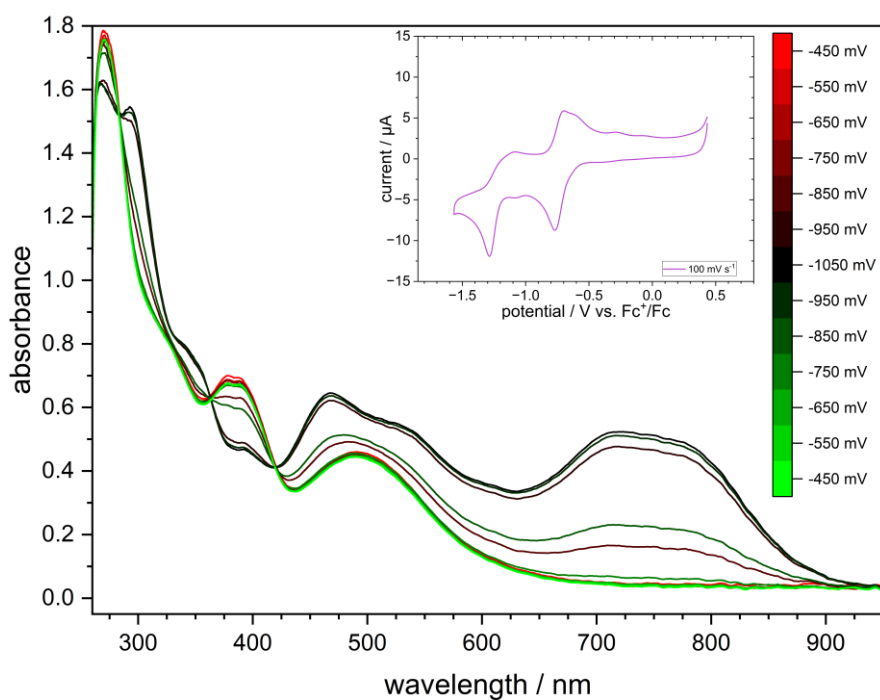

**Figure S52:** UV-Vis-NIR spectra obtained during spectroelectrochemical first reduction of complex 2 (0.5 mM) in dry, deaerated DMF containing 0.1 M  $n\text{Bu}_4\text{PF}_6$ , 90-180 s equilibrated potentials are given in V vs.  $\text{Fc}^+/\text{Fc}$ , the inset showing the cyclic voltammogram. The original spectrum was regained after reversed electrolysis (-450 mV).

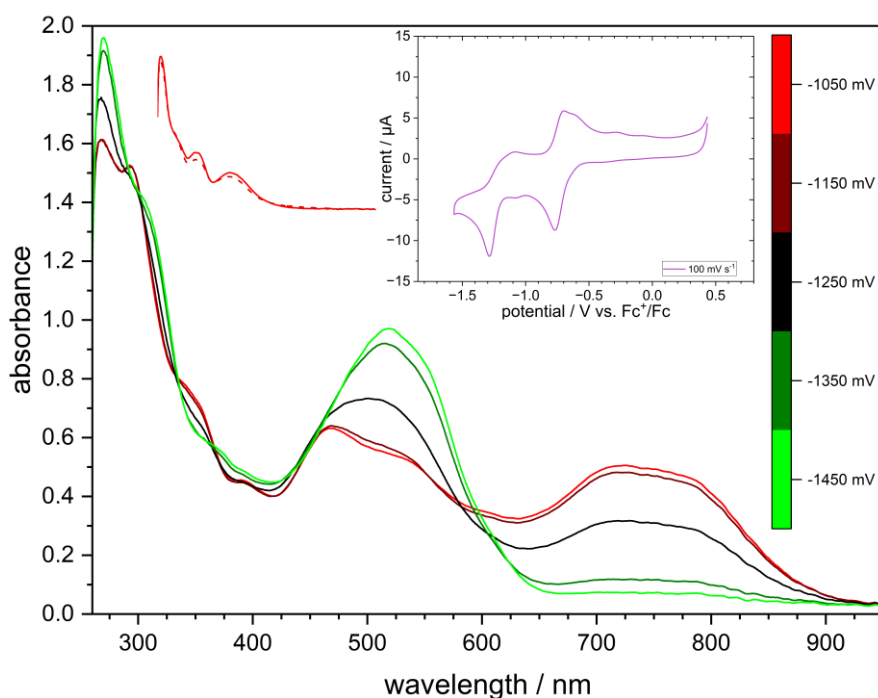

**Figure S53:** UV-Vis-NIR spectra obtained during spectroelectrochemical second reduction of complex **2** (0.5 mM) in dry, deaerated DMF containing 0.1 M *n*Bu<sub>4</sub>PF<sub>6</sub>, 90-180 s equilibrated potentials are given in V vs. Fc<sup>+/0</sup>/Fc, the insets showing the cyclic voltammogram and the spectra obtained before electrolysis and after reversed electrolysis (-450 mV).

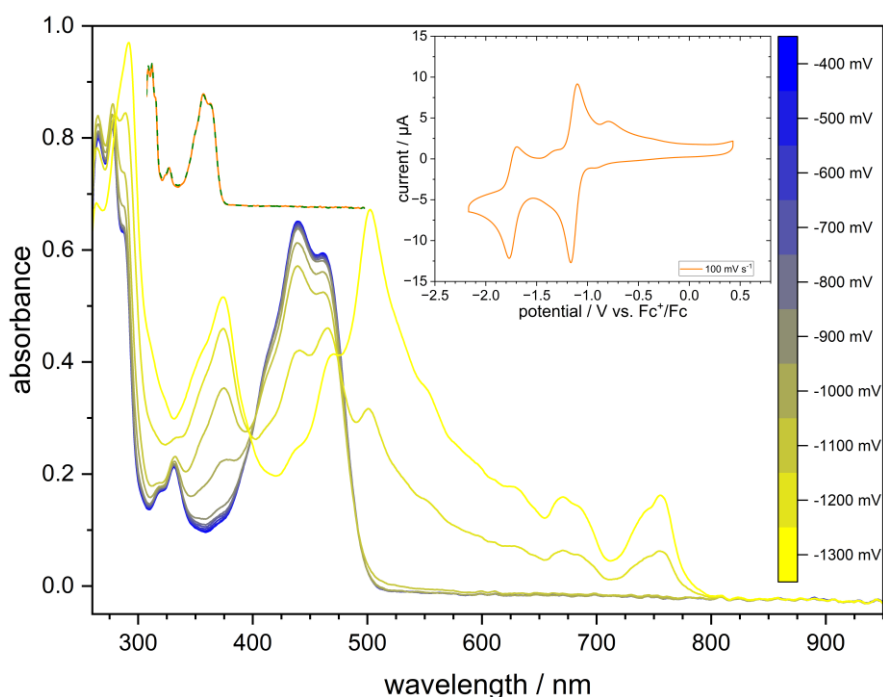

**Figure S54:** UV-Vis-NIR spectra obtained during spectroelectrochemical first reduction of ligand **1,3,10,12-tape** (0.5 mM) in dry, deaerated DMF containing 0.1 M *n*Bu<sub>4</sub>PF<sub>6</sub>, 90-180 s equilibrated potentials are given in V vs. Fc<sup>+/0</sup>/Fc, the insets showing the cyclic voltammogram and the spectra obtained before electrolysis and after reversed electrolysis (-400 mV).

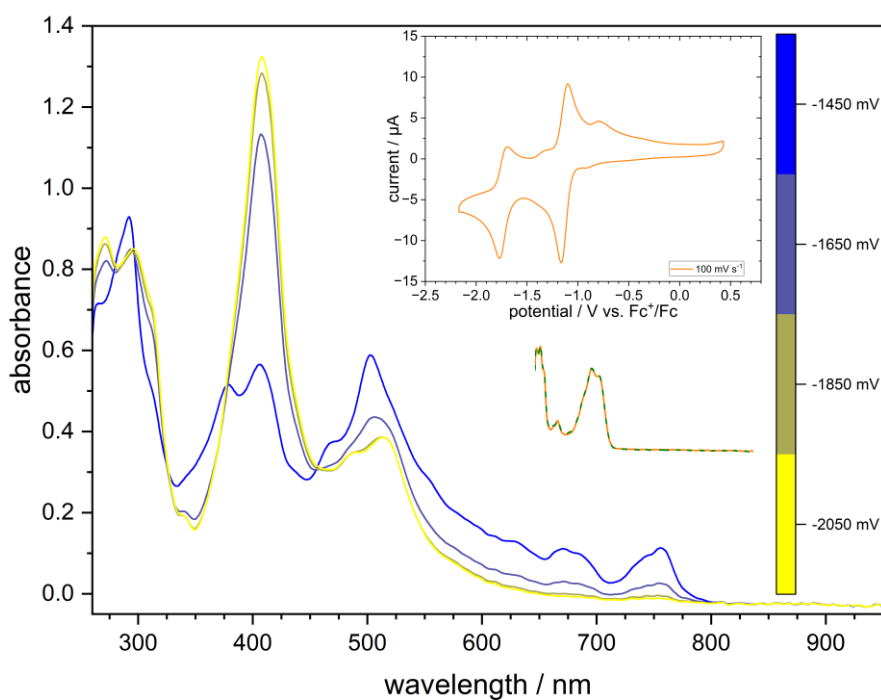

**Figure S55:** UV-Vis-NIR spectra obtained during spectroelectrochemical second reduction of ligand **1,3,10,12-tape** (0.5 mM) in dry, deaerated DMF containing 0.1 M  $n\text{Bu}_4\text{PF}_6$ , 90-180 s equilibrated potentials are given in V *vs.*  $\text{Fc}^+/\text{Fc}$ , the insets showing the cyclic voltammogram and the spectra obtained before electrolysis and after reversed electrolysis (-450 mV).

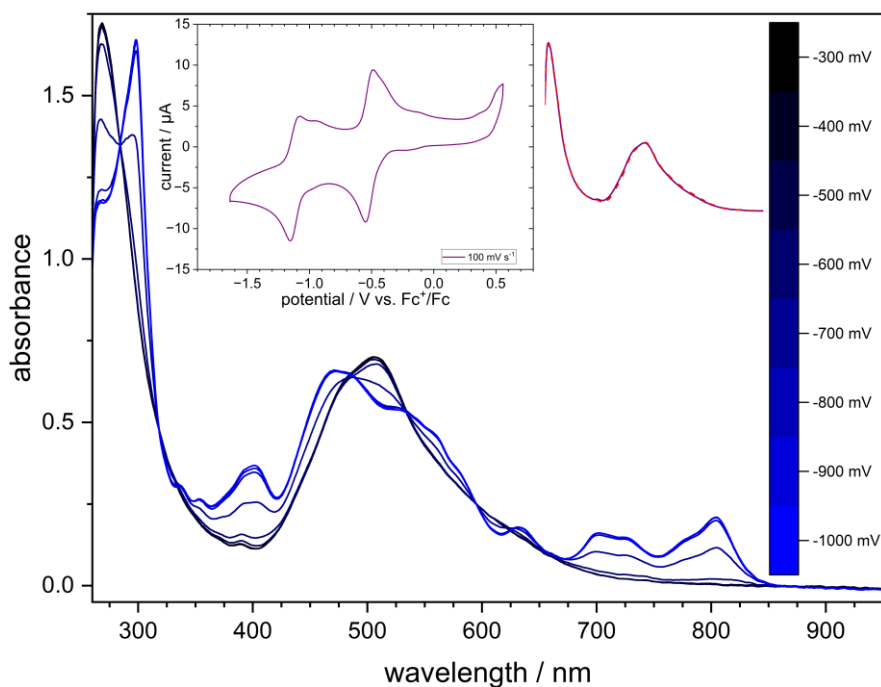

**Figure S56:** UV-Vis-NIR spectra obtained during spectroelectrochemical first reduction of complex **3** (0.5 mM) in dry, deaerated DMF containing 0.1 M  $n\text{Bu}_4\text{PF}_6$ , 90-180 s equilibrated potentials are given in V *vs.*  $\text{Fc}^+/\text{Fc}$ , the insets showing the cyclic voltammogram and the spectra obtained before electrolysis and after reversed electrolysis (-300 mV).

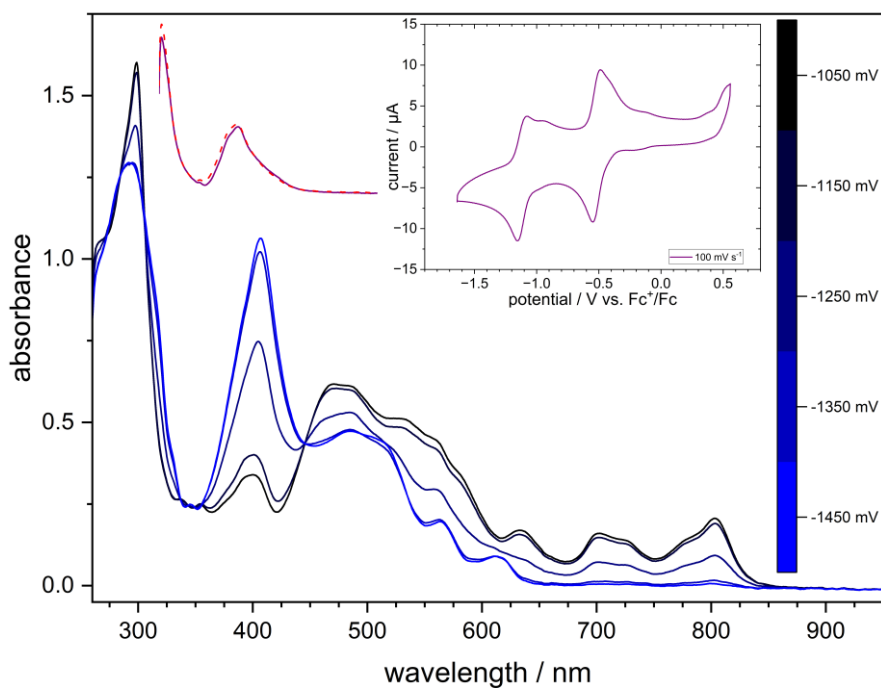

**Figure S57:** UV-Vis-NIR spectra obtained during spectroelectrochemical second reduction of complex 3 (0.5 mM) in dry, deaerated DMF containing 0.1 M *n*Bu<sub>4</sub>PF<sub>6</sub>, 90-180 s equilibrated potentials are given in V vs. Fc<sup>+</sup>/Fc, the insets showing the cyclic voltammogram and the spectra obtained before electrolysis and after reversed electrolysis (-250 mV).

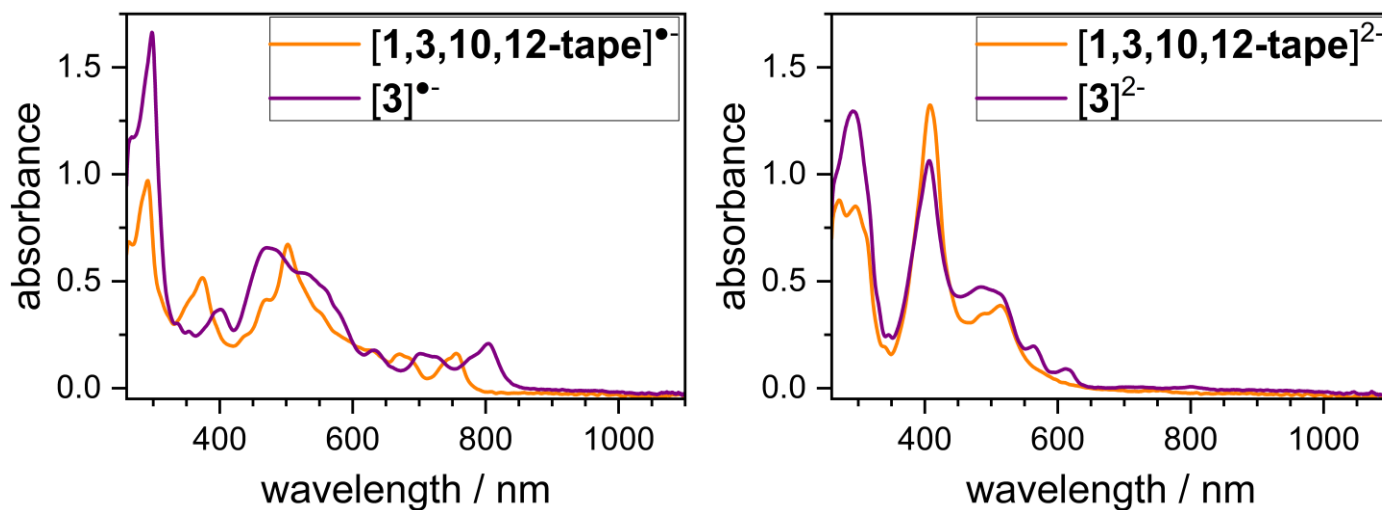

**Figure S58:** Direct comparison of the UV-Vis-NIR spectra obtained during spectroelectrochemical reduction of ligand 1,3,10,12-tape and complex 3 (0.5 mM) in dry, deaerated DMF containing 0.1 M *n*Bu<sub>4</sub>PF<sub>6</sub>, in their mono- and dianionic states.

## 7. Nanosecond transient absorption spectra

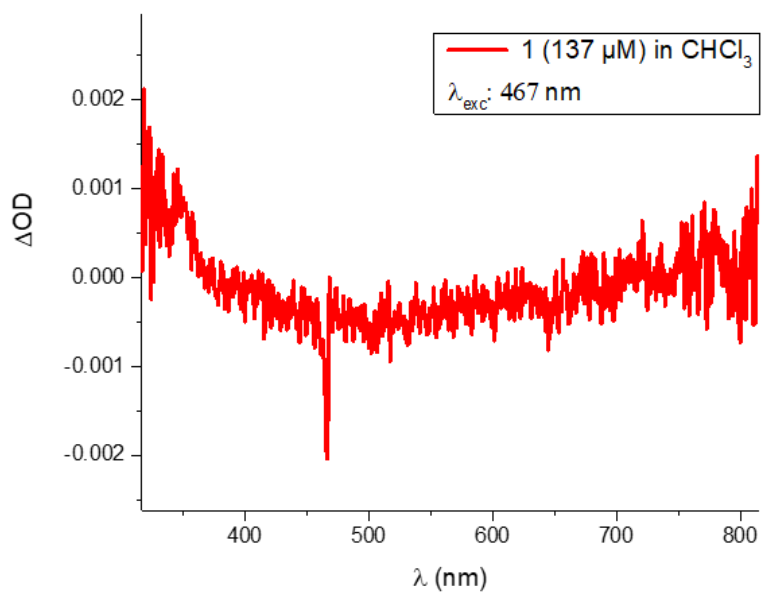

**Figure S59:** Nanosecond-transient absorption spectrum of [Re(CO)<sub>3</sub>(bpm)Cl] (1) dissolved in deaerated chloroform (137  $\mu$ M) upon 467 nm pump excitation.

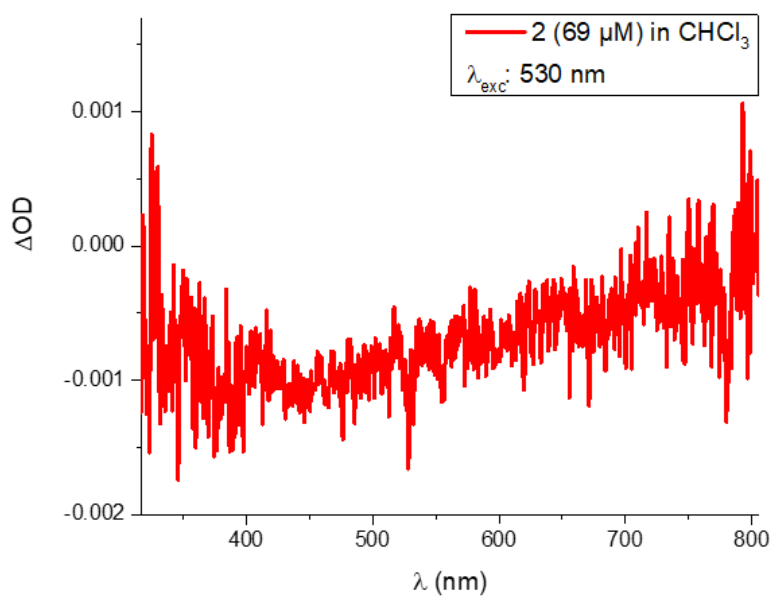

**Figure S60:** Nanosecond-transient absorption spectrum of [Re(CO)<sub>3</sub>(bqz)Cl] (2) dissolved in deaerated chloroform (69  $\mu$ M) upon 530 nm pump excitation.

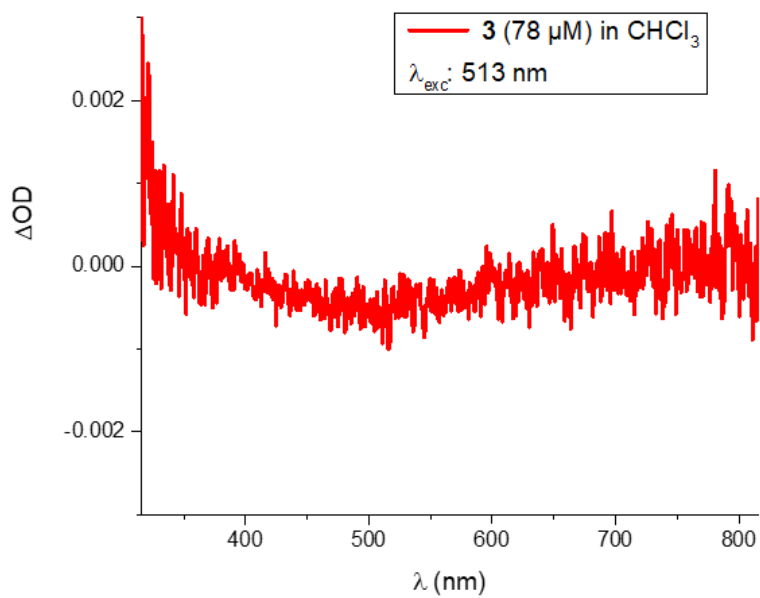

**Figure S61:** Nanosecond-transient absorption spectrum of  $[\text{Re}(\text{CO})_3(1,3,10,12\text{-tape})\text{Cl}]$  (**3**) dissolved in deaerated chloroform (78  $\mu\text{M}$ ) upon 513 nm pump excitation.
