# Supplementary material for: Red Light Absorption of [ReI(CO)3(α-diimine)Cl] Complexes through Extension of the 4,4′-Bipyrimidine Ligand’s π-System
Source: Molecules. 2023 Feb 16;28(4):1905. doi: 10.3390/molecules28041905 (PMC9964139; doi:10.3390/molecules28041905)
Supplement: Supplementary file 1 [file molecules-28-01905-s001.zip › 1_ccdc_deposit_2225447.cif]

data_nm22011_0m_a
_audit_creation_date               2022-12-09
_audit_creation_method
;
Olex2 1.2-beta
(compiled 2018.05.29 svn.r3508 for OlexSys, GUI svn.r5506)
;
_shelx_SHELXL_version_number       '2015/1'
_audit_contact_author_address      ?
_audit_contact_author_email        ?
_audit_contact_author_name         ''
_audit_contact_author_phone        ?
_publ_contact_author_id_orcid      ?
_publ_section_references
;
Dolomanov, O.V., Bourhis, L.J., Gildea, R.J, Howard, J.A.K. & Puschmann, H.
 (2009), J. Appl. Cryst. 42, 339-341.

Sheldrick, G.M. (2015). Acta Cryst. A71, 3-8.

Sheldrick, G.M. (2015). Acta Cryst. C71, 3-8.
;
_chemical_name_common              ?
_chemical_name_systematic          ?
_chemical_formula_moiety           'C11 H6 Cl N4 O3 Re'
_chemical_formula_sum              'C11 H6 Cl N4 O3 Re'
_chemical_formula_weight           463.85
_chemical_melting_point            ?
loop_
  _atom_type_symbol
  _atom_type_description
  _atom_type_scat_dispersion_real
  _atom_type_scat_dispersion_imag
  _atom_type_scat_source
 'C' 'C' 0.0033 0.0016 'International Tables Vol C Tables 4.2.6.8 and 6.1.1.4'
 'H' 'H' 0.0000 0.0000 'International Tables Vol C Tables 4.2.6.8 and 6.1.1.4'
 'Cl' 'Cl' 0.1484 0.1585 'International Tables Vol C Tables 4.2.6.8 and 6.1.1.4'
 'N' 'N' 0.0061 0.0033 'International Tables Vol C Tables 4.2.6.8 and 6.1.1.4'
 'O' 'O' 0.0106 0.0060 'International Tables Vol C Tables 4.2.6.8 and 6.1.1.4'
 'Re' 'Re' -1.0185 7.2310
 'International Tables Vol C Tables 4.2.6.8 and 6.1.1.4'

_shelx_space_group_comment
;
The symmetry employed for this shelxl refinement is uniquely defined
by the following loop, which should always be used as a source of
symmetry information in preference to the above space-group names.
They are only intended as comments.
;
_space_group_crystal_system        'triclinic'
_space_group_IT_number             2
_space_group_name_H-M_alt          'P -1'
_space_group_name_Hall             '-P 1'
loop_
  _space_group_symop_operation_xyz
 'x+, y+, z+'
 '-x+, -y+, -z+'

_cell_length_a                     7.8191(3)
_cell_length_b                     7.9719(3)
_cell_length_c                     21.5105(9)
_cell_angle_alpha                  80.661(2)
_cell_angle_beta                   84.045(2)
_cell_angle_gamma                  89.498(2)
_cell_volume                       1315.86(9)
_cell_formula_units_Z              4
_cell_measurement_reflns_used      9942
_cell_measurement_temperature      150(2)
_cell_measurement_theta_max        27.488
_cell_measurement_theta_min        2.612
_shelx_estimated_absorpt_T_max     ?
_shelx_estimated_absorpt_T_min     ?
_exptl_absorpt_coefficient_mu      9.449
_exptl_absorpt_correction_T_max    0.7456
_exptl_absorpt_correction_T_min    0.3712
_exptl_absorpt_correction_type     multi-scan
_exptl_absorpt_process_details    
 'SADABS-2016/2 (Bruker,2016/2) was used for absorption correction. wR2(int) was 0.1517 before and 0.0882 after correction. The Ratio of minimum to maximum transmission is 0.4979. The \l/2 correction factor is Not present.'
_exptl_absorpt_special_details     ?
_exptl_crystal_colour              orange
_exptl_crystal_colour_lustre       .
_exptl_crystal_colour_modifier     .
_exptl_crystal_colour_primary      orange
_exptl_crystal_density_diffrn      2.341
_exptl_crystal_density_meas        ?
_exptl_crystal_density_method      ?
_exptl_crystal_description         block
_exptl_crystal_F_000               864
_exptl_crystal_preparation         ?
_exptl_crystal_size_max            0.309
_exptl_crystal_size_mid            0.224
_exptl_crystal_size_min            0.22
_exptl_transmission_factor_max     ?
_exptl_transmission_factor_min     ?
_diffrn_reflns_av_R_equivalents    0.0740
_diffrn_reflns_av_unetI/netI       0.0577
_diffrn_reflns_Laue_measured_fraction_full  0.999
_diffrn_reflns_Laue_measured_fraction_max  0.998
_diffrn_reflns_limit_h_max         10
_diffrn_reflns_limit_h_min         -10
_diffrn_reflns_limit_k_max         10
_diffrn_reflns_limit_k_min         -10
_diffrn_reflns_limit_l_max         27
_diffrn_reflns_limit_l_min         -27
_diffrn_reflns_number              27494
_diffrn_reflns_point_group_measured_fraction_full  0.999
_diffrn_reflns_point_group_measured_fraction_max  0.998
_diffrn_reflns_theta_full          25.242
_diffrn_reflns_theta_max           27.501
_diffrn_reflns_theta_min           1.929
_diffrn_ambient_temperature        150.0
_diffrn_detector_area_resol_mean   8
_diffrn_measured_fraction_theta_full  0.999
_diffrn_measured_fraction_theta_max  0.998
_diffrn_measurement_device_type    'Bruker SMART APEX CCD area detector'
_diffrn_measurement_method         '\w and \f scans'
_diffrn_radiation_monochromator    graphite
_diffrn_radiation_type             MoK\a
_diffrn_radiation_wavelength       0.71073
_diffrn_source                     'sealed tube'
_diffrn_standards_number           0
_reflns_Friedel_coverage           0.000
_reflns_Friedel_fraction_full      .
_reflns_Friedel_fraction_max       .
_reflns_number_gt                  5590
_reflns_number_total               6037
_reflns_special_details
;
 Reflections were merged by SHELXL according to the crystal
 class for the calculation of statistics and refinement.
 
 _reflns_Friedel_fraction is defined as the number of unique
 Friedel pairs measured divided by the number that would be
 possible theoretically, ignoring centric projections and
 systematic absences.
;
_reflns_threshold_expression       'I > 2\s(I)'
_computing_cell_refinement         'SAINT v8.37A (Bruker, 2015)'
_computing_data_collection         ?
_computing_data_reduction          'SAINT v8.37A (Bruker, 2015)'
_computing_molecular_graphics      'Olex2 (Dolomanov et al., 2009)'
_computing_publication_material    'Olex2 (Dolomanov et al., 2009)'
_computing_structure_refinement    'ShelXL (Sheldrick, 2015)'
_computing_structure_solution      'ShelXT (Sheldrick, 2015)'
_refine_diff_density_max           2.607
_refine_diff_density_min           -2.281
_refine_diff_density_rms           0.232
_refine_ls_extinction_coef         .
_refine_ls_extinction_method       none
_refine_ls_goodness_of_fit_ref     1.096
_refine_ls_hydrogen_treatment      constr
_refine_ls_matrix_type             full
_refine_ls_number_parameters       361
_refine_ls_number_reflns           6037
_refine_ls_number_restraints       0
_refine_ls_R_factor_all            0.0370
_refine_ls_R_factor_gt             0.0343
_refine_ls_restrained_S_all        1.096
_refine_ls_shift/su_max            0.002
_refine_ls_shift/su_mean           0.000
_refine_ls_structure_factor_coef   Fsqd
_refine_ls_weighting_details      
 'w=1/[\s^2^(Fo^2^)+(0.0390P)^2^+0.6231P] where P=(Fo^2^+2Fc^2^)/3'
_refine_ls_weighting_scheme        calc
_refine_ls_wR_factor_gt            0.0878
_refine_ls_wR_factor_ref           0.0893
_refine_special_details            ?
_olex2_refinement_description
;
1. Fixed Uiso
 At 1.2 times of:
  All C(H) groups
2.a Aromatic/amide H refined with riding coordinates:
 C00L(H00L), C00R(H00R), C00S(H00S), C00T(H00T), C00U(H00U), C00V(H00V),
 C00X(H00X), C00Z(H00Z), C011(H011), C012(H012), C013(H013), C014(H014)
;
_atom_sites_solution_hydrogens     geom
_atom_sites_solution_primary       dual
_atom_sites_solution_secondary     ?
loop_
  _atom_site_label
  _atom_site_type_symbol
  _atom_site_fract_x
  _atom_site_fract_y
  _atom_site_fract_z
  _atom_site_U_iso_or_equiv
  _atom_site_adp_type
  _atom_site_occupancy
  _atom_site_site_symmetry_order
  _atom_site_calc_flag
  _atom_site_refinement_flags_posn
  _atom_site_refinement_flags_adp
  _atom_site_refinement_flags_occupancy
  _atom_site_disorder_assembly
  _atom_site_disorder_group
 Re01 Re 0.67031(2) 0.83587(2) 0.40397(2) 0.01828(7) Uani 1 1 d . . . . .
 Re02 Re 0.77081(2) 0.81288(2) 0.09342(2) 0.01775(7) Uani 1 1 d . . . . .
 Cl03 Cl 0.84110(16) 0.62113(16) 0.18940(6) 0.0267(3) Uani 1 1 d . . . . .
 Cl04 Cl 0.83377(17) 0.97087(15) 0.30391(6) 0.0291(3) Uani 1 1 d . . . . .
 O005 O 0.4816(5) 0.6653(5) 0.52944(19) 0.0332(9) Uani 1 1 d . . . . .
 N006 N 0.5473(5) 0.8856(5) 0.15174(19) 0.0192(8) Uani 1 1 d . . . . .
 O7 O 0.6848(5) 1.0328(5) -0.02911(19) 0.0360(9) Uani 1 1 d . . . . .
 O008 O 0.8270(6) 1.0836(5) 0.4781(2) 0.0390(10) Uani 1 1 d . . . . .
 O009 O 1.0678(5) 0.6702(5) 0.0138(2) 0.0374(10) Uani 1 1 d . . . . .
 O00A O 0.9976(5) 1.1048(5) 0.1144(2) 0.0377(10) Uani 1 1 d . . . . .
 N00B N 0.8775(6) 0.6521(5) 0.4054(2) 0.0237(9) Uani 1 1 d . . . . .
 O00C O 0.3546(5) 1.0611(5) 0.3861(2) 0.0376(10) Uani 1 1 d . . . . .
 C0D C 0.4203(6) 0.6377(6) 0.1260(2) 0.0201(10) Uani 1 1 d . . . . .
 N0E N 0.4013(6) 1.0686(6) 0.2154(2) 0.0302(10) Uani 1 1 d . . . . .
 N0F N 0.4005(7) 0.5320(6) 0.2894(2) 0.0342(11) Uani 1 1 d . . . . .
 N0G N 0.5761(5) 0.6182(5) 0.0941(2) 0.0200(8) Uani 1 1 d . . . . .
 C00H C 0.9169(6) 0.9947(6) 0.1050(2) 0.0243(11) Uani 1 1 d . . . . .
 N0I N 0.4863(7) 0.3553(6) 0.0706(3) 0.0362(12) Uani 1 1 d . . . . .
 C00J C 0.5513(6) 0.7257(6) 0.4815(2) 0.0204(10) Uani 1 1 d . . . . .
 N0K N 0.5953(6) 0.6461(5) 0.34966(19) 0.0213(9) Uani 1 1 d . . . . .
 C00L C 0.2528(6) 0.8318(7) 0.1907(2) 0.0229(10) Uani 1 1 d . . . . .
 H00L H 0.1512 0.7647 0.1948 0.028 Uiso 1 1 calc R . . . .
 C0M C 0.7107(6) 0.9511(6) 0.0172(2) 0.0230(10) Uani 1 1 d . . . . .
 C00N C 0.4764(7) 0.9811(6) 0.3929(2) 0.0232(10) Uani 1 1 d . . . . .
 C00O C 0.7643(7) 0.9910(6) 0.4500(3) 0.0269(12) Uani 1 1 d . . . . .
 C00P C 0.9577(6) 0.7246(6) 0.0439(2) 0.0237(10) Uani 1 1 d . . . . .
 N0Q N 1.1492(7) 0.5495(7) 0.4345(3) 0.0413(13) Uani 1 1 d . . . . .
 C00R C 0.5404(7) 1.0193(6) 0.1823(3) 0.0266(11) Uani 1 1 d . . . . .
 H00R H 0.6429 1.0839 0.1803 0.032 Uiso 1 1 calc R . . . .
 C00S C 0.2578(7) 0.9766(7) 0.2180(3) 0.0299(12) Uani 1 1 d . . . . .
 H00S H 0.1551 1.0123 0.2395 0.036 Uiso 1 1 calc R . . . .
 C00T C 0.6011(7) 0.4770(7) 0.0688(3) 0.0279(11) Uani 1 1 d . . . . .
 H00T H 0.7115 0.4625 0.0474 0.033 Uiso 1 1 calc R . . . .
 C00U C 0.4516(7) 0.6504(6) 0.3208(2) 0.0255(11) Uani 1 1 d . . . . .
 H00U H 0.3795 0.7463 0.3229 0.031 Uiso 1 1 calc R . . . .
 C00V C 0.9858(8) 0.3931(7) 0.3771(3) 0.0333(13) Uani 1 1 d . . . . .
 H00V H 0.9743 0.2968 0.3570 0.040 Uiso 1 1 calc R . . . .
 C00W C 0.4028(6) 0.7893(6) 0.1571(2) 0.0183(9) Uani 1 1 d . . . . .
 C00X C 0.6539(8) 0.3826(6) 0.3154(3) 0.0288(12) Uani 1 1 d . . . . .
 H00X H 0.7250 0.2859 0.3137 0.035 Uiso 1 1 calc R . . . .
 C00Y C 0.6989(7) 0.5118(6) 0.3459(2) 0.0224(10) Uani 1 1 d . . . . .
 C00Z C 0.5033(8) 0.3975(7) 0.2875(3) 0.0341(14) Uani 1 1 d . . . . .
 H00Z H 0.4709 0.3092 0.2661 0.041 Uiso 1 1 calc R . . . .
 C010 C 0.8592(7) 0.5149(6) 0.3770(2) 0.0224(10) Uani 1 1 d . . . . .
 C011 C 0.2933(7) 0.5169(7) 0.1296(3) 0.0284(12) Uani 1 1 d . . . . .
 H011 H 0.1834 0.5288 0.1518 0.034 Uiso 1 1 calc R . . . .
 C012 C 1.0241(7) 0.6631(7) 0.4317(3) 0.0310(12) Uani 1 1 d . . . . .
 H012 H 1.0400 0.7617 0.4501 0.037 Uiso 1 1 calc R . . . .
 C013 C 1.1261(8) 0.4144(8) 0.4065(3) 0.0393(15) Uani 1 1 d . . . . .
 H013 H 1.2126 0.3299 0.4073 0.047 Uiso 1 1 calc R . . . .
 C014 C 0.3313(7) 0.3777(7) 0.1000(3) 0.0315(12) Uani 1 1 d . . . . .
 H014 H 0.2439 0.2953 0.1005 0.038 Uiso 1 1 calc R . . . .

loop_
  _atom_site_aniso_label
  _atom_site_aniso_U_11
  _atom_site_aniso_U_22
  _atom_site_aniso_U_33
  _atom_site_aniso_U_23
  _atom_site_aniso_U_13
  _atom_site_aniso_U_12
 Re01 0.02157(12) 0.01235(10) 0.02069(12) -0.00453(7) 0.00169(8) 0.00162(7)
 Re02 0.01320(11) 0.01911(11) 0.02018(12) -0.00255(8) 0.00106(8) -0.00229(7)
 Cl03 0.0210(6) 0.0307(6) 0.0254(6) 0.0034(5) -0.0011(5) -0.0024(5)
 Cl04 0.0330(7) 0.0203(5) 0.0304(7) -0.0020(5) 0.0101(5) 0.0002(5)
 O005 0.042(2) 0.0249(19) 0.030(2) -0.0014(16) 0.0065(18) -0.0006(16)
 N006 0.0142(19) 0.024(2) 0.020(2) -0.0047(16) -0.0011(16) 0.0022(15)
 O7 0.029(2) 0.045(2) 0.029(2) 0.0059(18) -0.0019(17) -0.0017(18)
 O008 0.044(2) 0.032(2) 0.048(3) -0.023(2) -0.009(2) -0.0066(18)
 O009 0.029(2) 0.038(2) 0.042(2) -0.0083(19) 0.0114(19) 0.0024(17)
 O00A 0.030(2) 0.032(2) 0.052(3) -0.0070(19) -0.0063(19) -0.0151(17)
 N00B 0.027(2) 0.0141(18) 0.028(2) -0.0034(16) 0.0017(18) 0.0007(16)
 O00C 0.034(2) 0.029(2) 0.049(3) -0.0064(18) -0.0002(19) 0.0146(17)
 C0D 0.017(2) 0.018(2) 0.025(2) -0.0010(18) -0.0026(19) -0.0042(17)
 N0E 0.027(2) 0.032(2) 0.033(3) -0.012(2) -0.001(2) 0.0042(19)
 N0F 0.046(3) 0.029(2) 0.030(3) -0.006(2) -0.009(2) -0.007(2)
 N0G 0.0154(19) 0.0201(19) 0.025(2) -0.0048(16) -0.0040(16) -0.0028(15)
 C00H 0.019(2) 0.029(3) 0.023(3) 0.000(2) 0.002(2) -0.002(2)
 N0I 0.038(3) 0.025(2) 0.047(3) -0.013(2) 0.000(2) -0.006(2)
 C00J 0.023(2) 0.017(2) 0.022(2) -0.0053(18) -0.0050(19) 0.0042(18)
 N0K 0.029(2) 0.0143(18) 0.021(2) -0.0043(15) 0.0011(17) -0.0023(16)
 C00L 0.012(2) 0.033(3) 0.024(3) -0.004(2) -0.0019(19) -0.0008(19)
 C0M 0.017(2) 0.026(2) 0.024(3) -0.002(2) 0.0012(19) -0.0009(18)
 C00N 0.027(3) 0.017(2) 0.025(3) -0.0050(18) 0.003(2) 0.0023(19)
 C00O 0.027(3) 0.022(2) 0.030(3) -0.003(2) 0.005(2) 0.006(2)
 C00P 0.022(2) 0.023(2) 0.025(3) -0.0019(19) 0.001(2) -0.0043(19)
 N0Q 0.029(3) 0.044(3) 0.051(3) -0.007(2) -0.005(2) 0.015(2)
 C00R 0.023(3) 0.026(2) 0.030(3) -0.003(2) 0.000(2) 0.0008(19)
 C00S 0.023(3) 0.033(3) 0.033(3) -0.006(2) 0.000(2) 0.009(2)
 C00T 0.025(3) 0.028(3) 0.031(3) -0.010(2) 0.001(2) -0.004(2)
 C00U 0.030(3) 0.021(2) 0.026(3) -0.005(2) -0.009(2) -0.001(2)
 C00V 0.044(3) 0.019(2) 0.034(3) -0.006(2) 0.008(3) 0.007(2)
 C00W 0.014(2) 0.019(2) 0.021(2) -0.0004(17) -0.0012(18) -0.0003(17)
 C00X 0.042(3) 0.017(2) 0.027(3) -0.008(2) 0.007(2) -0.007(2)
 C00Y 0.033(3) 0.014(2) 0.017(2) 0.0001(17) 0.006(2) 0.0021(18)
 C00Z 0.057(4) 0.022(2) 0.024(3) -0.010(2) 0.005(3) -0.017(2)
 C010 0.025(2) 0.020(2) 0.021(2) -0.0026(18) 0.004(2) 0.0063(19)
 C011 0.020(3) 0.032(3) 0.031(3) 0.002(2) 0.002(2) -0.005(2)
 C012 0.025(3) 0.031(3) 0.038(3) -0.009(2) -0.001(2) 0.008(2)
 C013 0.033(3) 0.033(3) 0.048(4) -0.002(3) 0.001(3) 0.017(2)
 C014 0.025(3) 0.029(3) 0.042(3) -0.008(2) -0.007(2) -0.010(2)

_geom_special_details
;
 All esds (except the esd in the dihedral angle between two l.s. planes)
 are estimated using the full covariance matrix.  The cell esds are taken
 into account individually in the estimation of esds in distances, angles
 and torsion angles; correlations between esds in cell parameters are only
 used when they are defined by crystal symmetry.  An approximate (isotropic)
 treatment of cell esds is used for estimating esds involving l.s. planes.
;
loop_
  _geom_bond_atom_site_label_1
  _geom_bond_atom_site_label_2
  _geom_bond_distance
  _geom_bond_site_symmetry_2
  _geom_bond_publ_flag
 Re01 Cl04 2.4751(12) . ?
 Re01 N00B 2.173(4) . ?
 Re01 C00J 1.906(5) . ?
 Re01 N0K 2.175(4) . ?
 Re01 C00N 1.911(5) . ?
 Re01 C00O 1.901(6) . ?
 Re02 Cl03 2.4694(13) . ?
 Re02 N006 2.174(4) . ?
 Re02 N0G 2.181(4) . ?
 Re02 C00H 1.916(5) . ?
 Re02 C0M 1.920(5) . ?
 Re02 C00P 1.915(5) . ?
 O005 C00J 1.149(6) . ?
 N006 C00R 1.338(6) . ?
 N006 C00W 1.356(6) . ?
 O7 C0M 1.134(6) . ?
 O008 C00O 1.167(7) . ?
 O009 C00P 1.147(6) . ?
 O00A C00H 1.142(6) . ?
 N00B C010 1.351(6) . ?
 N00B C012 1.340(8) . ?
 O00C C00N 1.150(6) . ?
 C0D N0G 1.356(6) . ?
 C0D C00W 1.473(6) . ?
 C0D C011 1.376(7) . ?
 N0E C00R 1.328(6) . ?
 N0E C00S 1.338(7) . ?
 N0F C00U 1.333(7) . ?
 N0F C00Z 1.338(8) . ?
 N0G C00T 1.333(6) . ?
 N0I C00T 1.320(7) . ?
 N0I C014 1.332(7) . ?
 N0K C00U 1.336(7) . ?
 N0K C00Y 1.345(6) . ?
 C00L H00L 0.9500 . ?
 C00L C00S 1.380(7) . ?
 C00L C00W 1.381(6) . ?
 N0Q C012 1.327(7) . ?
 N0Q C013 1.339(8) . ?
 C00R H00R 0.9500 . ?
 C00S H00S 0.9500 . ?
 C00T H00T 0.9500 . ?
 C00U H00U 0.9500 . ?
 C00V H00V 0.9500 . ?
 C00V C010 1.380(7) . ?
 C00V C013 1.346(9) . ?
 C00X H00X 0.9500 . ?
 C00X C00Y 1.373(7) . ?
 C00X C00Z 1.372(9) . ?
 C00Y C010 1.484(8) . ?
 C00Z H00Z 0.9500 . ?
 C011 H011 0.9500 . ?
 C011 C014 1.383(8) . ?
 C012 H012 0.9500 . ?
 C013 H013 0.9500 . ?
 C014 H014 0.9500 . ?

loop_
  _geom_angle_atom_site_label_1
  _geom_angle_atom_site_label_2
  _geom_angle_atom_site_label_3
  _geom_angle
  _geom_angle_site_symmetry_1
  _geom_angle_site_symmetry_3
  _geom_angle_publ_flag
 N00B Re01 Cl04 83.73(11) . . ?
 N00B Re01 N0K 74.18(16) . . ?
 C00J Re01 Cl04 177.81(15) . . ?
 C00J Re01 N00B 94.08(18) . . ?
 C00J Re01 N0K 93.97(18) . . ?
 C00J Re01 C00N 88.3(2) . . ?
 N0K Re01 Cl04 85.58(11) . . ?
 C00N Re01 Cl04 93.87(15) . . ?
 C00N Re01 N00B 171.3(2) . . ?
 C00N Re01 N0K 97.36(19) . . ?
 C00O Re01 Cl04 91.63(16) . . ?
 C00O Re01 N00B 98.97(19) . . ?
 C00O Re01 C00J 88.6(2) . . ?
 C00O Re01 N0K 172.83(19) . . ?
 C00O Re01 C00N 89.4(2) . . ?
 N006 Re02 Cl03 86.26(12) . . ?
 N006 Re02 N0G 74.33(15) . . ?
 N0G Re02 Cl03 82.21(12) . . ?
 C00H Re02 Cl03 94.84(16) . . ?
 C00H Re02 N006 96.03(17) . . ?
 C00H Re02 N0G 170.04(17) . . ?
 C00H Re02 C0M 88.3(2) . . ?
 C0M Re02 Cl03 176.75(16) . . ?
 C0M Re02 N006 94.25(18) . . ?
 C0M Re02 N0G 94.83(19) . . ?
 C00P Re02 Cl03 90.75(16) . . ?
 C00P Re02 N006 173.86(17) . . ?
 C00P Re02 N0G 99.96(18) . . ?
 C00P Re02 C00H 89.6(2) . . ?
 C00P Re02 C0M 88.4(2) . . ?
 C00R N006 Re02 125.1(3) . . ?
 C00R N006 C00W 117.2(4) . . ?
 C00W N006 Re02 117.7(3) . . ?
 C010 N00B Re01 117.9(4) . . ?
 C012 N00B Re01 125.6(3) . . ?
 C012 N00B C010 116.4(4) . . ?
 N0G C0D C00W 115.4(4) . . ?
 N0G C0D C011 120.2(4) . . ?
 C011 C0D C00W 124.4(4) . . ?
 C00R N0E C00S 116.9(5) . . ?
 C00U N0F C00Z 116.1(5) . . ?
 C0D N0G Re02 117.3(3) . . ?
 C00T N0G Re02 125.2(3) . . ?
 C00T N0G C0D 117.4(4) . . ?
 O00A C00H Re02 176.3(4) . . ?
 C00T N0I C014 116.6(5) . . ?
 O005 C00J Re01 176.9(4) . . ?
 C00U N0K Re01 125.0(3) . . ?
 C00U N0K C00Y 117.2(4) . . ?
 C00Y N0K Re01 117.8(4) . . ?
 C00S C00L H00L 121.7 . . ?
 C00S C00L C00W 116.7(5) . . ?
 C00W C00L H00L 121.7 . . ?
 O7 C0M Re02 176.1(4) . . ?
 O00C C00N Re01 176.4(5) . . ?
 O008 C00O Re01 177.8(5) . . ?
 O009 C00P Re02 178.9(5) . . ?
 C012 N0Q C013 115.7(6) . . ?
 N006 C00R H00R 117.4 . . ?
 N0E C00R N006 125.1(5) . . ?
 N0E C00R H00R 117.4 . . ?
 N0E C00S C00L 122.7(5) . . ?
 N0E C00S H00S 118.7 . . ?
 C00L C00S H00S 118.7 . . ?
 N0G C00T H00T 117.1 . . ?
 N0I C00T N0G 125.9(5) . . ?
 N0I C00T H00T 117.1 . . ?
 N0F C00U N0K 125.8(5) . . ?
 N0F C00U H00U 117.1 . . ?
 N0K C00U H00U 117.1 . . ?
 C010 C00V H00V 120.9 . . ?
 C013 C00V H00V 120.9 . . ?
 C013 C00V C010 118.2(5) . . ?
 N006 C00W C0D 115.1(4) . . ?
 N006 C00W C00L 121.3(4) . . ?
 C00L C00W C0D 123.6(4) . . ?
 C00Y C00X H00X 121.0 . . ?
 C00Y C00X C00Z 118.1(5) . . ?
 C00Z C00X H00X 121.0 . . ?
 N0K C00Y C00X 120.6(5) . . ?
 N0K C00Y C010 115.3(4) . . ?
 C00X C00Y C010 124.1(5) . . ?
 N0F C00Z C00X 122.2(5) . . ?
 N0F C00Z H00Z 118.9 . . ?
 C00X C00Z H00Z 118.9 . . ?
 N00B C010 C00V 120.5(5) . . ?
 N00B C010 C00Y 114.7(4) . . ?
 C00V C010 C00Y 124.9(5) . . ?
 C0D C011 H011 121.2 . . ?
 C0D C011 C014 117.7(5) . . ?
 C014 C011 H011 121.2 . . ?
 N00B C012 H012 116.9 . . ?
 N0Q C012 N00B 126.2(5) . . ?
 N0Q C012 H012 116.9 . . ?
 N0Q C013 C00V 122.9(5) . . ?
 N0Q C013 H013 118.5 . . ?
 C00V C013 H013 118.5 . . ?
 N0I C014 C011 122.2(5) . . ?
 N0I C014 H014 118.9 . . ?
 C011 C014 H014 118.9 . . ?

loop_
  _refln_index_h
  _refln_index_k
  _refln_index_l
  _refln_F_squared_meas
  _refln_F_squared_sigma
 -1 0 0 941.01 100.49
 -1 0 0 1015.6 100.49
 1 0 0 1203.78 101.39
 -2 0 0 2519.55 223.58
 -2 0 0 2069.59 221.38
 2 0 0 2378.26 222.88
 -3 0 0 101.29 13.1
 -3 0 0 88.79 10.1
 -3 0 0 91.19 10.2
 3 0 0 78.49 10.2
 3 0 0 100.19 12
 3 0 0 99.69 9.5
 -4 0 0 144.69 19.4
 -4 0 0 106.59 11.8
 -4 0 0 98.09 11.6
 4 0 0 104.19 10.8
 4 0 0 90.69 11.9
 4 0 0 108.19 13.9
 -5 0 0 21 4.3
 -5 0 0 25.1 9.1
 -5 0 0 16.9 4
 5 0 0 20.1 4.5
 5 0 0 21.9 6.4
 5 0 0 22.8 3.2
 -6 0 0 157.28 17.8
 -6 0 0 131.39 23.3
 -6 0 0 196.48 17.9
 6 0 0 166.78 20.8
 6 0 0 146.79 16
 6 0 0 160.48 18.3
 -7 0 0 293.57 29.7
 -7 0 0 276.97 27.7
 -7 0 0 194.28 34
 -7 0 0 193.28 50.39
 7 0 0 306.37 31.8
 7 0 0 285.97 28.8
 7 0 0 248.38 25.8
 -8 0 0 11.1 5.1
 -8 0 0 8.9 11.4
 -8 0 0 13.6 5.3
 -8 0 0 6.1 24.6
 8 0 0 5.8 2.9
 8 0 0 -0.1 4.9
 -9 0 0 758.72 70.69
 -9 0 0 493.45 105.29
 -9 0 0 782.52 71.29
 9 0 0 630.94 71.69
 9 0 0 728.63 68.29
 -10 0 0 71.29 24.5
 -10 0 0 103.99 17.5
 10 0 0 102.89 12
 10 -1 0 406.76 38.3
 -10 1 0 314.77 56.59
 -10 1 0 401.56 42.4
 9 -1 0 348.77 39.9
 9 -1 0 390.86 36.2
 -9 1 0 397.86 39.2
 -9 1 0 266.87 75.39
 -9 1 0 392.26 39.6
 -9 1 0 303.37 51.39
 8 -1 0 716.13 84.99
 8 -1 0 927.01 82.79
 -8 1 0 723.93 95.39
 -8 1 0 924.81 85.29
 -8 1 0 1003.8 85.19
 -8 1 0 789.22 120.19
 7 -1 0 78.19 12.4
 7 -1 0 94.69 10.2
 7 -1 0 108.39 17.6
 -7 1 0 95.79 12.9
 -7 1 0 89.89 12
 -7 1 0 75.89 20.3
 6 -1 0 276.97 32.6
 6 -1 0 260.47 28.2
 -6 1 0 270.87 28.2
 -6 1 0 249.18 35.9
 -6 1 0 275.27 27.9
 5 -1 0 12.9 6.2
 5 -1 0 17.1 4
 -5 1 0 12.6 7.4
 -5 1 0 16.2 4.1
 -5 1 0 15.3 3.4
 4 -1 0 246.48 26.8
 4 -1 0 254.77 26.7
 4 -1 0 265.77 30.2
 -4 1 0 298.87 32.9
 -4 1 0 257.27 26.7
 -4 1 0 263.27 26.8
 3 -1 0 179.98 19.9
 3 -1 0 196.58 19.7
 -3 1 0 201.78 19.9
 -3 1 0 204.28 19.8
 -3 1 0 192.18 23.7
 2 -1 0 2860.41 267.17
 2 -1 0 2630.44 267.17
 2 -1 0 2736.13 269.67
 -2 1 0 3122.89 270.77
 -2 1 0 2802.12 267.07
 -2 1 0 2674.93 267.17
 1 -1 0 4603.94 470.75
 -1 1 0 5049.19 472.15
 0 -1 0 958.3 96.09
 0 -1 0 1136.99 95.29
 0 -1 0 1006.6 95.49
 0 -1 0 954.2 95.19
 0 1 0 953.4 96.19
 0 1 0 984.3 95.59
 -1 -1 0 6118.39 598.54
 1 1 0 6316.67 599.94
 -2 -1 0 516.15 54.69
 -2 -1 0 593.74 53.99
 -2 -1 0 538.85 54.39
 2 1 0 588.44 54.29
 2 1 0 574.84 53.99
 2 1 0 563.24 54.49
 -3 -1 0 1873.31 192.18
 -3 -1 0 2016.5 190.08
 -3 -1 0 2041.1 190.78
 3 1 0 2013.7 190.08
 3 1 0 2026.5 190.98
 -4 -1 0 71.89 11.6
 -4 -1 0 78.19 9.3
 4 1 0 83.59 10.1
 4 1 0 89.59 8.6
 4 1 0 69.79 9.7
 -5 -1 0 27.2 4.4
 -5 -1 0 15.6 3.8
 -5 -1 0 19.5 7.4
 5 1 0 11.5 2.6
 5 1 0 11.7 4
 5 1 0 13.3 4.6
 -6 -1 0 32.5 10.7
 -6 -1 0 50.29 6.8
 -6 -1 0 35.1 6.9
 -6 -1 0 49.7 25
 6 1 0 26.3 6.8
 6 1 0 46.9 5.3
 -7 -1 0 305.67 41.4
 -7 -1 0 413.86 37.4
 -7 -1 0 354.16 63.19
 -7 -1 0 408.76 37
 7 1 0 357.26 35.2
 7 1 0 310.67 37.6
 -8 -1 0 580.24 54.99
 -8 -1 0 646.84 55.79
 -8 -1 0 395.36 80.49
 8 1 0 534.15 53.19
 8 1 0 509.15 56.39
 -9 -1 0 65.89 20.7
 -9 -1 0 125.69 15.6
 -9 -1 0 103.89 48.3
 -9 -1 0 131.59 16.2
 9 1 0 101.19 16.7
 9 1 0 96.89 11.7
 -10 -1 0 805.92 78.89
 10 1 0 756.62 75.59
 9 -2 0 440.96 51.09
 9 -2 0 398.36 40.3
 9 -2 0 470.95 41.8
 -9 2 0 305.67 44.7
 -9 2 0 371.16 114.29
 -9 2 0 428.46 44.2
 8 -2 0 660.73 80.29
 8 -2 0 841.72 78.29
 -8 2 0 667.63 113.69
 -8 2 0 884.51 81.09
 -8 2 0 929.51 80.89
 7 -2 0 908.71 91.69
 -7 2 0 905.21 84.29
 -7 2 0 839.12 85.79
 -7 2 0 745.43 95.49
 6 -2 0 469.25 48.2
 6 -2 0 330.57 40.6
 -6 2 0 465.15 41.3
 -6 2 0 393.16 41.2
 -6 2 0 366.96 50.39
 5 -2 0 13.6 7
 5 -2 0 14.4 4
 5 -2 0 7.2 2.5
 -5 2 0 15.6 4.2
 -5 2 0 16.5 3.9
 -5 2 0 13.6 8.6
 4 -2 0 1.4 3.6
 4 -2 0 1.8 1.8
 4 -2 0 3.4 2.4
 -4 2 0 1.1 3.8
 -4 2 0 8.4 2.3
 -4 2 0 2.2 2.1
 3 -2 0 874.41 93.59
 3 -2 0 1059.19 98.49
 3 -2 0 969.5 93.89
 3 -2 0 997.4 93.49
 -3 2 0 975.7 93.89
 -3 2 0 971.1 99.59
 2 -2 0 240.58 26.8
 2 -2 0 313.77 26.9
 2 -2 0 290.77 30.6
 2 -2 0 250.97 26.9
 -2 2 0 266.17 31.1
 -2 2 0 282.07 27
 1 -2 0 2937.41 290.87
 1 -2 0 3043.2 288.17
 -1 2 0 2958.9 291.47
 -1 2 0 3238.08 288.37
 -1 2 0 2951.2 288.17
 0 -2 0 172.68 16.9
 0 -2 0 171.68 18.7
 0 -2 0 174.38 17
 0 2 0 160.78 16.9
 0 2 0 162.68 17.6
 0 2 0 183.88 19.2
 -1 -2 0 2550.44 234.78
 1 2 0 2365.36 235.88
 1 2 0 2479.95 234.88
 -2 -2 0 2688.23 242.38
 -2 -2 0 2640.34 241.98
 -2 -2 0 2185.08 249.58
 2 2 0 2622.24 242.58
 -3 -2 0 124.79 12.6
 -3 -2 0 101.89 21.3
 -3 -2 0 122.79 12.1
 3 2 0 115.59 12.1
 3 2 0 111.09 12.9
 -4 -2 0 1302.97 124.89
 -4 -2 0 1221.18 140.39
 -4 -2 0 1378.06 125.79
 4 2 0 1371.76 124.99
 4 2 0 1219.38 126.09
 -5 -2 0 127.69 13
 -5 -2 0 93.19 26.6
 5 2 0 100.69 13.4
 5 2 0 109.39 11.8
 -6 -2 0 70.29 7.6
 -6 -2 0 11.2 15.7
 -6 -2 0 42 6.5
 6 2 0 16.6 6.3
 6 2 0 43.5 5.4
 -7 -2 0 113.09 40.4
 -7 -2 0 187.58 19.7
 -7 -2 0 194.38 19.4
 7 2 0 147.39 20.4
 7 2 0 166.48 17.6
 -8 -2 0 387.76 81.19
 -8 -2 0 601.44 54.49
 -8 -2 0 579.14 54.99
 8 2 0 550.04 52.69
 8 2 0 486.75 55.89
 -9 -2 0 280.37 79.19
 -9 -2 0 459.35 44.5
 -9 -2 0 478.65 48.5
 9 2 0 351.86 47.7
 9 2 0 460.25 42.7
 9 -3 0 1000.8 104.29
 9 -3 0 1222.28 101.99
 9 -3 0 1138.89 101.19
 -9 3 0 861.11 149.19
 -9 3 0 815.42 120.79
 -9 3 0 1042.9 104.09
 8 -3 0 63.99 11.9
 8 -3 0 76.49 21
 8 -3 0 84.69 10.4
 -8 3 0 57.39 24.1
 -8 3 0 70.79 12.6
 7 -3 0 863.51 86.09
 7 -3 0 779.92 75.09
 -7 3 0 637.64 88.89
 -7 3 0 781.42 76.99
 6 -3 0 140.09 13.7
 6 -3 0 100.19 16.5
 6 -3 0 134.19 22
 6 -3 0 117.39 14.8
 -6 3 0 110.39 14.9
 -6 3 0 110.39 24.8
 5 -3 0 294.67 34.4
 5 -3 0 250.77 26.5
 5 -3 0 230.98 27
 5 -3 0 254.77 27.4
 -5 3 0 277.87 37.5
 -5 3 0 282.47 27.7
 4 -3 0 71.39 13.6
 4 -3 0 70.09 8.6
 4 -3 0 70.99 9
 4 -3 0 73.49 8.4
 -4 3 0 68.49 9
 -4 3 0 75.89 16.3
 3 -3 0 312.87 34.4
 3 -3 0 301.57 28.7
 3 -3 0 269.57 28.8
 3 -3 0 270.47 29
 -3 3 0 318.07 29.2
 -3 3 0 262.37 35.4
 2 -3 0 3180.08 292.17
 2 -3 0 3106.69 296.87
 2 -3 0 2959.5 292.27
 -2 3 0 3096.79 292.37
 -2 3 0 3036.5 292.37
 -2 3 0 3005.1 298.37
 1 -3 0 43.1 8.7
 1 -3 0 64.19 6.2
 1 -3 0 54.59 6.3
 -1 3 0 50.19 6.3
 -1 3 0 57.19 10.2
 0 -3 0 1157.98 118.09
 0 -3 0 1330.37 121.19
 0 -3 0 1313.47 118.49
 0 3 0 1077.59 118.19
 0 3 0 1215.78 123.79
 0 3 0 1300.97 119.49
 -1 -3 0 257.67 26.7
 -1 -3 0 237.78 24
 1 3 0 213.98 24.1
 1 3 0 255.07 26.5
 -2 -3 0 4366.76 374.76
 -2 -3 0 3758.32 365.16
 -2 -3 0 3525.35 365.36
 2 3 0 3763.02 365.36
 2 3 0 3783.52 366.46
 -3 -3 0 1806.62 204.98
 -3 -3 0 2310.27 193.98
 -3 -3 0 2054.19 194.38
 3 3 0 1965.8 193.98
 3 3 0 1978.1 194.78
 -4 -3 0 231.58 21.3
 -4 -3 0 210.48 20.4
 -4 -3 0 146.19 32.1
 4 3 0 209.08 20.6
 4 3 0 180.38 21.5
 -5 -3 0 124.69 31.2
 -5 -3 0 154.88 16.3
 -5 -3 0 175.58 17.6
 5 3 0 128.59 17.8
 5 3 0 177.48 16.7
 -6 -3 0 41.7 22.2
 -6 -3 0 80.69 9.9
 6 3 0 72.19 8.5
 6 3 0 60.89 10.8
 -7 -3 0 323.47 29.5
 -7 -3 0 206.08 50.39
 -7 -3 0 256.77 29.1
 7 3 0 277.17 31.3
 7 3 0 275.17 28
 -8 -3 0 102.69 13.2
 -8 -3 0 57.69 35.4
 -8 -3 0 95.69 13.5
 8 3 0 98.39 16.2
 8 3 0 92.69 11.7
 -9 -3 0 447.06 95.59
 -9 -3 0 691.73 62.89
 -9 -3 0 639.94 61.69
 9 3 0 583.14 64.79
 9 3 0 606.54 60.29
 9 -4 0 155.28 22.5
 9 -4 0 182.58 19.7
 -9 4 0 141.89 64.99
 -9 4 0 150.28 47
 -9 4 0 179.08 23.7
 8 -4 0 927.31 107.29
 8 -4 0 1248.98 120.99
 8 -4 0 1172.48 105.99
 -8 4 0 1132.89 108.19
 -8 4 0 951.5 126.59
 7 -4 0 9.7 10.9
 7 -4 0 11.7 4.1
 7 -4 0 2.1 4.1
 7 -4 0 15.5 6.1
 -7 4 0 17.9 6.9
 -7 4 0 12.3 15.1
 6 -4 0 697.43 65.59
 6 -4 0 600.34 66.19
 6 -4 0 575.54 66.39
 6 -4 0 761.42 76.89
 -6 4 0 783.62 67.39
 -6 4 0 618.94 80.59
 5 -4 0 13.4 4.1
 5 -4 0 3.7 2.5
 5 -4 0 2.7 2.9
 5 -4 0 7.4 8.1
 -5 4 0 3.7 3.9
 -5 4 0 -1.5 6.5
 4 -4 0 27.1 9.8
 4 -4 0 16.4 4.2
 4 -4 0 22.7 4.3
 4 -4 0 19.2 4.5
 -4 4 0 14.1 9.5
 -4 4 0 28.1 5
 3 -4 0 284.67 30.6
 3 -4 0 312.17 36.6
 3 -4 0 335.47 30.4
 -3 4 0 275.17 38.4
 -3 4 0 304.57 30.7
 2 -4 0 78.59 8.8
 2 -4 0 71.09 13
 2 -4 0 76.29 8.5
 -2 4 0 82.29 9.1
 -2 4 0 66.39 8.8
 -2 4 0 70.39 14.8
 1 -4 0 1391.46 135.49
 1 -4 0 1491.95 135.39
 1 -4 0 1433.46 139.99
 -1 4 0 1333.57 135.59
 -1 4 0 1435.46 141.99
 -1 4 0 1383.16 137.59
 0 -4 0 666.53 68.39
 0 -4 0 655.83 64.79
 0 -4 0 697.43 65.19
 0 4 0 745.63 66.69
 0 4 0 675.63 69.89
 0 4 0 555.44 64.89
 -1 -4 0 3389.36 319.67
 -1 -4 0 3407.66 318.07
 1 4 0 3420.36 322.07
 1 4 0 3114.29 318.27
 -2 -4 0 152.08 20.4
 -2 -4 0 142.59 14.6
 -2 -4 0 117.19 14.6
 2 4 0 127.89 14.8
 2 4 0 147.49 17.4
 -3 -4 0 2228.88 196.18
 -3 -4 0 2114.39 195.58
 -3 -4 0 1861.11 205.58
 3 4 0 1959.1 195.78
 -4 -4 0 289.77 26.8
 -4 -4 0 278.37 26
 4 4 0 243.68 26.1
 4 4 0 208.38 26.9
 -5 -4 0 146.39 15
 -5 -4 0 150.88 16
 -5 -4 0 101.29 29
 5 4 0 125.89 16.8
 5 4 0 144.59 15.3
 -6 -4 0 6.5 2.7
 -6 -4 0 4.7 15.3
 -6 -4 0 14.6 5
 6 4 0 12.4 3.8
 6 4 0 5.6 4.3
 -7 -4 0 40.9 7.8
 -7 -4 0 22.1 22
 7 4 0 30.7 6
 7 4 0 33.9 9.4
 -8 -4 0 670.63 60.99
 -8 -4 0 646.04 61.29
 8 4 0 546.45 63.39
 8 4 0 544.35 59.39
 -9 -4 0 17 9.4
 -9 -4 0 34.2 11
 -9 -4 0 24.4 51.49
 9 4 0 21.8 12.9
 9 4 0 17.6 6.1
 8 -5 0 431.36 37.9
 8 -5 0 340.47 39.5
 8 -5 0 343.07 39.7
 -8 5 0 363.06 40.7
 -8 5 0 298.57 62.59
 -8 5 0 410.06 89.39
 7 -5 0 745.43 74.69
 7 -5 0 533.75 60.19
 7 -5 0 629.54 58.89
 7 -5 0 565.94 59.99
 -7 5 0 635.84 60.99
 -7 5 0 446.56 76.59
 6 -5 0 12.1 10.9
 6 -5 0 10.7 4.6
 6 -5 0 11.9 6.9
 6 -5 0 15.9 4.4
 -6 5 0 9.1 5.7
 -6 5 0 6.7 12.5
 5 -5 0 350.26 36.5
 5 -5 0 398.96 35.9
 5 -5 0 380.16 45.8
 5 -5 0 303.37 36
 -5 5 0 350.66 36.6
 -5 5 0 346.37 50.49
 4 -5 0 4.6 2.6
 4 -5 0 3.2 2.9
 4 -5 0 1.8 6.7
 4 -5 0 3.3 3.2
 -4 5 0 3 3
 -4 5 0 6.9 8.9
 3 -5 0 46.8 7.2
 3 -5 0 60.39 7.1
 3 -5 0 56.49 13.3
 -3 5 0 45.6 15.4
 -3 5 0 45.5 7.5
 2 -5 0 182.58 22.1
 2 -5 0 219.28 28.2
 2 -5 0 230.38 22.3
 -2 5 0 220.48 31.2
 -2 5 0 253.77 23.1
 -2 5 0 193.58 22.5
 1 -5 0 1502.95 148.59
 1 -5 0 1615.14 143.19
 1 -5 0 1464.15 143.29
 -1 5 0 1439.86 145.49
 -1 5 0 1455.65 151.18
 -1 5 0 1461.15 143.59
 0 -5 0 2214.18 209.68
 0 -5 0 2118.69 209.18
 0 -5 0 2129.39 213.58
 0 5 0 1995.6 209.58
 0 5 0 2110.59 215.88
 0 5 0 2514.55 211.68
 -1 -5 0 1036.5 100.29
 -1 -5 0 1092.79 101.29
 -1 -5 0 973.1 100.69
 1 5 0 1027.1 105.79
 1 5 0 1094.79 100.99
 -2 -5 0 3227.78 294.37
 -2 -5 0 3152.58 293.87
 -2 -5 0 3096.39 297.87
 2 5 0 2971.7 298.27
 2 5 0 2932.41 294.27
 -3 -5 0 260.57 27.2
 -3 -5 0 225.18 33.7
 -3 -5 0 260.37 26.8
 3 5 0 320.17 31.6
 3 5 0 237.48 27.1
 -4 -5 0 614.84 58.79
 -4 -5 0 681.43 59.59
 -4 -5 0 493.25 68.89
 4 5 0 600.34 59.29
 -5 -5 0 39.2 6.8
 -5 -5 0 17.5 14.9
 -5 -5 0 32 5.7
 5 5 0 30.3 6.3
 -6 -5 0 4.9 14.5
 -6 -5 0 10.5 3.8
 -6 -5 0 10.6 4.7
 6 5 0 2.3 5.4
 6 5 0 6.7 3.8
 -7 -5 0 86.79 10.8
 -7 -5 0 53.69 27.1
 -7 -5 0 109.19 13.2
 7 5 0 88.99 16.1
 7 5 0 73.59 11.6
 -8 -5 0 112.99 14.6
 -8 -5 0 47.5 31.7
 8 5 0 97.59 19.1
 8 5 0 106.69 13.6
 8 -6 0 65.39 10.9
 8 -6 0 46.1 11.4
 8 -6 0 45.9 11
 -8 6 0 58.89 12.7
 -8 6 0 39.5 30.5
 -8 6 0 34.1 51.39
 7 -6 0 553.74 50.79
 7 -6 0 428.56 51.69
 7 -6 0 577.74 67.29
 7 -6 0 482.85 52.39
 -7 6 0 553.94 53.09
 -7 6 0 423.06 74.39
 6 -6 0 240.48 29.2
 6 -6 0 347.07 43.4
 6 -6 0 243.18 29.6
 -6 6 0 322.37 30.7
 -6 6 0 234.18 48.3
 5 -6 0 19.3 11.1
 5 -6 0 16.7 5.6
 5 -6 0 18.8 4.8
 5 -6 0 10.2 4.3
 -5 6 0 23 6.4
 -5 6 0 17.8 14.5
 4 -6 0 52.49 7.3
 4 -6 0 46 8
 4 -6 0 41 7.3
 4 -6 0 45.5 14.9
 -4 6 0 40.1 18.6
 -4 6 0 41.5 8.1
 3 -6 0 -1.1 6.7
 3 -6 0 4 2.9
 3 -6 0 3.8 3.5
 -3 6 0 6 12.5
 -3 6 0 6.8 3.8
 2 -6 0 354.56 34.4
 2 -6 0 346.07 41.1
 2 -6 0 345.27 34
 -2 6 0 301.17 44.4
 -2 6 0 294.57 34.6
 -2 6 0 356.26 38.8
 1 -6 0 93.59 12.2
 1 -6 0 113.49 12.2
 1 -6 0 111.69 18
 -1 6 0 102.79 14.5
 -1 6 0 104.59 13
 -1 6 0 98.99 20.6
 0 -6 0 2943.61 264.47
 0 -6 0 2849.91 263.77
 0 6 0 2720.53 272.57
 0 6 0 2504.95 264.27
 -1 -6 0 1377.46 121.09
 -1 -6 0 1299.27 122.09
 1 6 0 1239.88 128.49
 1 6 0 1091.59 121.39
 -2 -6 0 2103.19 175.18
 -2 -6 0 1656.53 176.18
 2 6 0 1593.44 175.38
 2 6 0 1951.8 182.18
 -3 -6 0 881.41 78.09
 -3 -6 0 710.13 79.09
 -3 -6 0 740.13 82.99
 3 6 0 870.21 78.89
 -4 -6 0 421.66 41.4
 -4 -6 0 341.97 48.6
 -4 -6 0 459.25 40.9
 4 6 0 402.56 41.5
 -5 -6 0 164.78 17.9
 -5 -6 0 151.18 16.8
 5 6 0 133.59 17.4
 -6 -6 0 15 16.7
 -6 -6 0 41.7 8.1
 -6 -6 0 39.7 7.1
 6 6 0 33 7.2
 -7 -6 0 39.5 7
 -7 -6 0 43.5 8.8
 -7 -6 0 13.3 20.1
 7 6 0 45.7 8.7
 -8 -6 0 -1.2 26
 8 6 0 2.3 6.5
 7 -7 0 1.9 5.5
 7 -7 0 4.6 6.6
 7 -7 0 10.2 8.8
 -7 7 0 9.9 24.1
 -7 7 0 9 40.6
 -7 7 0 -2.6 8.5
 6 -7 0 412.96 52.59
 6 -7 0 489.65 53.39
 6 -7 0 609.24 52.59
 -6 7 0 600.44 54.39
 -6 7 0 502.25 82.49
 5 -7 0 285.37 27.4
 5 -7 0 301.97 40.5
 5 -7 0 236.78 27.6
 5 -7 0 227.58 27.8
 -5 7 0 206.68 45.2
 -5 7 0 269.47 28.7
 4 -7 0 3.4 9.2
 4 -7 0 2.1 3.5
 4 -7 0 9.5 4.6
 4 -7 0 5.2 4.8
 -4 7 0 7.2 9.6
 -4 7 0 3.1 12.2
 3 -7 0 50.69 8.9
 3 -7 0 54.59 15.9
 3 -7 0 56.49 8.5
 -3 7 0 60.89 15.4
 -3 7 0 44.9 18.7
 2 -7 0 69.09 10
 2 -7 0 70.39 16.5
 2 -7 0 68.09 9.4
 -2 7 0 60.59 20.6
 -2 7 0 69.49 10.8
 1 -7 0 1030.2 94.49
 1 -7 0 886.61 94.69
 -1 7 0 847.12 95.29
 -1 7 0 980.8 107.29
 -1 7 0 1062.79 95.89
 0 -7 0 9.3 3.7
 0 -7 0 12.3 4.5
 0 7 0 2.1 7.5
 0 7 0 8.6 4.7
 -1 -7 0 1504.55 145.99
 -1 -7 0 1543.65 144.79
 1 7 0 1506.15 154.78
 1 7 0 1439.96 145.79
 -2 -7 0 47.1 7.5
 -2 -7 0 50.49 9.7
 2 7 0 55.99 16.3
 2 7 0 31.5 7.8
 -3 -7 0 1525.55 134.19
 -3 -7 0 1349.66 133.29
 3 7 0 1259.57 134.19
 -4 -7 0 136.09 17
 -4 -7 0 169.78 16.9
 -4 -7 0 125.79 22.6
 4 7 0 158.18 17.9
 -5 -7 0 107.29 12.5
 -5 -7 0 98.79 13
 -5 -7 0 78.79 22.3
 5 7 0 96.09 13.9
 -6 -7 0 1.2 4.2
 -6 -7 0 4.6 5.3
 -6 -7 0 0.8 14.4
 6 7 0 -2.2 5.1
 -7 -7 0 -5.5 19.2
 -7 -7 0 4.2 5.2
 -7 -7 0 10.7 9.7
 7 7 0 -0.1 6.7
 6 -8 0 11.4 6.4
 6 -8 0 8.9 8.6
 6 -8 0 13.5 7.2
 -6 8 0 15.1 33.6
 -6 8 0 18.9 27
 -6 8 0 20.8 10
 5 -8 0 361.46 34.3
 5 -8 0 309.87 35
 -5 8 0 281.27 58.19
 -5 8 0 289.37 63.59
 -5 8 0 314.67 35.5
 -5 8 0 343.47 47.6
 4 -8 0 2.3 4.2
 4 -8 0 4.9 4.9
 4 -8 0 10.5 6.6
 -4 8 0 25.5 22.3
 -4 8 0 7.6 12
 -4 8 0 -1.7 16.3
 3 -8 0 13.8 5.1
 3 -8 0 27 6.7
 -3 8 0 11.8 16.5
 -3 8 0 1.6 14.2
 -3 8 0 6.2 8.9
 2 -8 0 67.29 11.7
 2 -8 0 93.69 11.7
 -2 8 0 85.19 26.4
 -2 8 0 71.09 13.2
 -2 8 0 91.39 15.3
 -2 8 0 73.39 18.4
 1 -8 0 507.65 47.4
 1 -8 0 487.15 48
 -1 8 0 454.95 61.99
 -1 8 0 407.96 48.5
 0 -8 0 359.86 35.1
 0 -8 0 353.46 36.1
 0 8 0 298.87 36.3
 0 8 0 333.07 52.99
 -1 -8 0 458.65 42.2
 -1 -8 0 438.06 42.8
 -1 -8 0 440.76 43.8
 1 8 0 369.76 43.2
 1 8 0 350.76 52.89
 -2 -8 0 1211.88 124.19
 -2 -8 0 1195.48 125.19
 -2 -8 0 1267.77 123.69
 2 8 0 1315.77 125.39
 2 8 0 1389.46 136.79
 -3 -8 0 17.2 5.1
 -3 -8 0 12.4 6.4
 -3 -8 0 25 6.8
 3 8 0 22 15.5
 3 8 0 16.1 6.8
 -4 -8 0 393.46 50.39
 -4 -8 0 512.95 49.3
 -4 -8 0 562.64 48.9
 4 8 0 530.75 50.59
 -5 -8 0 27.9 13.5
 -5 -8 0 47.3 8.9
 -5 -8 0 33.4 7.7
 5 8 0 41.5 10
 -6 -8 0 23.3 16.7
 -6 -8 0 54.29 9.9
 6 8 0 47.9 10.7
 4 -9 0 102.19 15.6
 4 -9 0 113.79 17.5
 4 -9 0 76.79 14.5
 -4 9 0 78.89 30.7
 -4 9 0 91.99 37.7
 3 -9 0 38.8 7.9
 3 -9 0 20.6 8.5
 -3 9 0 36.2 25.8
 2 -9 0 366.46 33.4
 2 -9 0 307.17 33.8
 -2 9 0 250.37 51.69
 -2 9 0 289.27 35.5
 1 -9 0 1.7 4.5
 1 -9 0 1.1 6.3
 -1 9 0 8.5 16.1
 -1 9 0 -5.2 6.9
 0 -9 0 798.52 68.99
 0 -9 0 684.73 69.79
 0 9 0 597.64 70.49
 0 9 0 651.43 84.99
 -1 -9 0 274.97 33
 -1 -9 0 341.77 32.4
 -1 -9 0 287.27 31.1
 1 9 0 279.37 47.1
 1 9 0 273.77 33.6
 -2 -9 0 364.96 40.9
 -2 -9 0 324.17 39.2
 -2 -9 0 457.35 43.7
 2 9 0 365.26 53.59
 2 9 0 307.97 39.6
 -3 -9 0 747.83 73.49
 -3 -9 0 753.52 72.69
 -3 -9 0 597.04 74.19
 3 9 0 896.01 91.19
 3 9 0 673.33 74.59
 -4 -9 0 10.4 5.5
 -4 -9 0 14.1 9.8
 -4 -9 0 10.7 6.7
 4 9 0 22 9
 4 9 0 9.8 18.8
 2 -10 0 37.1 10.6
 2 -10 0 38.6 9.2
 -2 10 0 19.5 25.8
 1 -10 0 164.98 21.8
 1 -10 0 140.09 19.4
 -1 10 0 173.08 46.4
 -1 10 0 132.39 23.9
 0 -10 0 -4.8 8.8
 0 -10 0 2.4 6.1
 0 10 0 -8.5 20.9
 0 10 0 13.9 10.2
 -1 -10 0 890.71 79.19
 -1 -10 0 655.43 71.99
 1 10 0 674.53 78.79
 1 10 0 642.24 88.99
 1 10 -1 18.6 24.2
 -1 -10 1 23 11.8
 0 10 -1 611.74 69.29
 0 10 -1 628.04 87.69
 0 -10 1 643.94 65.19
 -1 10 -1 20.5 12.5
 -1 10 -1 18.1 24.9
 1 -10 1 27.6 9.7
 4 9 -1 6.7 7.7
 4 9 -1 -7.8 17.2
 -4 -9 1 0.8 8.3
 -4 -9 1 -5.5 5.1
 -4 -9 1 4.8 6.7
 3 9 -1 1.1 18.2
 3 9 -1 0.6 7.7
 -3 -9 1 10.1 8.7
 -3 -9 1 2.8 5.6
 -3 -9 1 9.9 5.5
 2 9 -1 119.99 33.5
 -2 -9 1 119.69 17.6
 -2 -9 1 109.89 18.2
 -2 -9 1 126.79 15.8
 1 9 -1 466.95 67.79
 1 9 -1 483.05 53.09
 -1 -9 1 547.95 51.79
 -1 -9 1 482.85 52.19
 -1 -9 1 509.35 51.19
 0 9 -1 54.39 23.5
 0 9 -1 75.39 14.2
 0 -9 1 61.89 10.3
 0 -9 1 72.89 12.9
 -1 9 -1 1097.39 132.49
 -1 9 -1 1126.69 115.39
 1 -9 1 1286.87 113.19
 1 -9 1 1096.59 113.49
 -2 9 -1 4.1 16.4
 2 -9 1 11.4 5.6
 2 -9 1 8.5 6.3
 -3 9 -1 781.72 109.79
 3 -9 1 751.12 80.19
 3 -9 1 886.31 81.09
 -4 9 -1 18.3 28.3
 -4 9 -1 13.3 20.8
 -4 9 -1 -0.1 13.2
 4 -9 1 23.1 8.2
 4 -9 1 21.4 6.9
 6 8 -1 45.3 11.4
 -6 -8 1 33.1 17.5
 -6 -8 1 62.19 10.3
 5 8 -1 125.09 16
 -5 -8 1 72.39 19.7
 -5 -8 1 113.39 14.2
 -5 -8 1 88.09 13.4
 4 8 -1 12.7 6.6
 4 8 -1 11.1 14.6
 -4 -8 1 5.5 6
 -4 -8 1 0.4 4.1
 -4 -8 1 7.3 4.6
 3 8 -1 124.99 28.7
 3 8 -1 110.09 16.5
 -3 -8 1 88.79 16.2
 -3 -8 1 112.39 14.7
 -3 -8 1 142.89 15.1
 2 8 -1 73.29 23
 2 8 -1 57.79 11.5
 -2 -8 1 65.59 12.4
 -2 -8 1 60.99 9.7
 -2 -8 1 66.39 10.2
 1 8 -1 366.06 51.09
 1 8 -1 344.27 38.8
 -1 -8 1 382.06 38.7
 -1 -8 1 343.27 37.6
 -1 -8 1 377.86 37.3
 0 8 -1 297.77 51.69
 0 8 -1 268.67 34.3
 0 -8 1 336.27 34.1
 0 -8 1 345.77 33
 -1 8 -1 649.34 82.69
 -1 8 -1 602.74 68.49
 1 -8 1 700.23 67.59
 1 -8 1 734.63 67.19
 -2 8 -1 1035.7 112.69
 -2 8 -1 1121.09 129.69
 2 -8 1 1071.69 111.39
 2 -8 1 1322.67 111.49
 -3 8 -1 255.57 48
 -3 8 -1 244.28 38.9
 -3 8 -1 257.97 32.6
 3 -8 1 254.07 37.5
 3 -8 1 213.38 27
 3 -8 1 276.37 27.1
 -4 8 -1 535.25 78.89
 -4 8 -1 607.24 65.09
 -4 8 -1 497.25 73.19
 4 -8 1 585.54 68.39
 4 -8 1 529.65 56.39
 4 -8 1 559.54 55.79
 -5 8 -1 -12.3 18.3
 -5 8 -1 0.5 7.1
 -5 8 -1 -5.5 25.8
 5 -8 1 2.4 12.1
 5 -8 1 4.9 5
 5 -8 1 1.5 5.1
 5 -8 1 -5.1 6.2
 -6 8 -1 0.8 35.6
 -6 8 -1 -1.1 8.9
 -6 8 -1 -0.9 27.1
 6 -8 1 6.7 6.4
 6 -8 1 12.4 6.3
 6 -8 1 -0.9 7.9
 7 7 -1 440.56 49
 -7 -7 1 499.05 48
 6 7 -1 151.58 19.4
 -6 -7 1 106.19 29.6
 -6 -7 1 172.78 19.2
 -6 -7 1 176.78 17.9
 5 7 -1 261.87 27.7
 -5 -7 1 263.37 26.2
 -5 -7 1 271.87 27.2
 -5 -7 1 195.38 35
 4 7 -1 6.3 4.8
 -4 -7 1 8.4 4.2
 -4 -7 1 18.8 5.2
 -4 -7 1 13 8.7
 3 7 -1 14.3 5.3
 3 7 -1 21.2 13.6
 -3 -7 1 14 5.3
 -3 -7 1 21.1 4.6
 -3 -7 1 16.4 4.7
 2 7 -1 478.85 59.89
 2 7 -1 622.84 69.89
 -2 -7 1 732.43 60.39
 -2 -7 1 631.34 59.39
 -2 -7 1 533.35 60.29
 1 7 -1 78.99 12.5
 1 7 -1 97.49 21.2
 -1 -7 1 92.69 11.3
 -1 -7 1 93.39 12.9
 0 7 -1 1934.01 205.48
 0 7 -1 1985.1 215.78
 0 -7 1 2200.88 205.18
 0 -7 1 2376.86 204.68
 -1 7 -1 67.29 11.5
 -1 7 -1 84.99 21.8
 1 -7 1 83.59 10.9
 1 -7 1 84.79 17
 1 -7 1 77.09 10.3
 -2 7 -1 1361.46 130.39
 -2 7 -1 1194.28 128.19
 -2 7 -1 1257.57 142.19
 -2 7 -1 1220.08 133.29
 2 -7 1 1370.86 127.19
 2 -7 1 1377.26 135.99
 2 -7 1 1393.26 127.59
 -3 7 -1 480.65 66.69
 -3 7 -1 488.55 63.79
 -3 7 -1 576.44 57.19
 3 -7 1 419.26 50.09
 3 -7 1 495.75 59.09
 3 -7 1 539.15 50.29
 -4 7 -1 298.27 51.89
 -4 7 -1 315.37 33.3
 -4 7 -1 316.67 51.59
 4 -7 1 304.97 32.9
 4 -7 1 336.07 43.5
 4 -7 1 342.07 32.6
 4 -7 1 280.67 32.7
 -5 7 -1 308.17 55.39
 -5 7 -1 342.17 34.9
 -5 7 -1 327.47 60.79
 5 -7 1 304.07 34.3
 5 -7 1 302.57 33.6
 5 -7 1 375.76 47.4
 -6 7 -1 -1.5 6.9
 -6 7 -1 -5.2 21.6
 -6 7 -1 4.1 29
 6 -7 1 5.9 4.8
 6 -7 1 2.8 4.6
 6 -7 1 -1.7 5.9
 6 -7 1 1.6 15.9
 -7 7 -1 21.6 9.7
 -7 7 -1 -0.3 25.6
 -7 7 -1 7.9 39
 7 -7 1 6.6 6.8
 7 -7 1 13.7 16
 7 -7 1 17.3 8.8
 7 -7 1 16.6 6.9
 8 6 -1 639.64 64.39
 7 6 -1 11.3 5.6
 -7 -6 1 -2.7 19.3
 -7 -6 1 12.5 4.8
 -7 -6 1 1.3 4.4
 6 6 -1 726.73 77.19
 -6 -6 1 780.62 77.59
 -6 -6 1 835.22 76.69
 5 6 -1 16.4 5
 -5 -6 1 14.4 4.4
 -5 -6 1 14.5 5
 -5 -6 1 8 11.8
 4 6 -1 117.49 13.7
 -4 -6 1 107.89 13.1
 -4 -6 1 91.49 21.2
 -4 -6 1 110.69 12.6
 3 6 -1 53.29 9.1
 3 6 -1 82.49 16.8
 -3 -6 1 64.49 8.6
 -3 -6 1 61.19 9
 2 6 -1 211.68 28.4
 2 6 -1 212.38 21.5
 -2 -6 1 205.08 20.5
 -2 -6 1 176.48 20.4
 -2 -6 1 186.28 20.7
 1 6 -1 1204.48 119.09
 1 6 -1 1187.08 126.49
 -1 -6 1 1323.57 118.39
 -1 -6 1 1174.58 119.09
 0 6 -1 460.35 53.09
 0 6 -1 404.26 44
 0 -6 1 421.26 43.8
 0 -6 1 435.66 43.3
 0 -6 1 449.95 48.7
 -1 6 -1 1844.32 211.68
 -1 6 -1 2441.56 212.38
 -1 6 -1 2119.49 221.98
 -1 6 -1 2338.57 213.78
 1 -6 1 2250.07 217.68
 1 -6 1 2268.57 211.18
 1 -6 1 2082.19 211.18
 -2 6 -1 0.1 3.3
 -2 6 -1 1.1 8
 -2 6 -1 2.6 4.6
 2 -6 1 2.1 5.9
 2 -6 1 4.6 3
 2 -6 1 -1 2.8
 -3 6 -1 1133.89 108.59
 3 -6 1 1147.39 108.09
 3 -6 1 1065.29 108.09
 -4 6 -1 162.88 33.9
 -4 6 -1 183.98 21.4
 4 -6 1 176.88 21.1
 4 -6 1 220.18 21
 4 -6 1 226.78 31.1
 4 -6 1 188.58 21.1
 -5 6 -1 94.89 12.7
 -5 6 -1 83.99 27.6
 5 -6 1 76.99 11.7
 5 -6 1 99.59 22.2
 5 -6 1 92.39 12.3
 5 -6 1 99.89 11.9
 -6 6 -1 99.59 14.4
 -6 6 -1 119.19 43.3
 -6 6 -1 88.19 32.6
 6 -6 1 74.19 12.7
 6 -6 1 123.69 13.1
 6 -6 1 100.09 25.2
 6 -6 1 93.39 13.7
 -7 6 -1 4.7 7.1
 -7 6 -1 17.1 23.3
 -7 6 -1 5.3 36.1
 7 -6 1 4 5
 7 -6 1 6.6 6.6
 7 -6 1 7.4 15
 7 -6 1 9.4 5.6
 -8 6 -1 59.39 35.1
 -8 6 -1 101.79 18.1
 -8 6 -1 113.69 55.39
 8 -6 1 75.79 15.7
 8 -6 1 94.09 16.9
 8 -6 1 137.69 35.8
 8 -6 1 108.99 14.1
 8 5 -1 215.18 23.4
 8 5 -1 204.38 28.6
 -8 -5 1 197.08 23.9
 7 5 -1 537.55 68.79
 7 5 -1 654.33 66.29
 -7 -5 1 782.92 67.69
 -7 -5 1 682.53 65.69
 6 5 -1 313.47 31.2
 -6 -5 1 225.48 46.7
 -6 -5 1 306.37 31.4
 -6 -5 1 316.27 30.7
 5 5 -1 716.23 80.09
 -5 -5 1 837.22 79.79
 -5 -5 1 914.01 80.89
 4 5 -1 13.1 4
 -4 -5 1 7.4 2.9
 -4 -5 1 14.5 12.3
 -4 -5 1 17 3.9
 3 5 -1 28.5 5.5
 3 5 -1 31.7 10.3
 -3 -5 1 22.2 10.6
 -3 -5 1 23.5 4.8
 -3 -5 1 29.3 5.2
 2 5 -1 211.28 27.9
 2 5 -1 210.08 23.2
 -2 -5 1 228.08 22.7
 -2 -5 1 229.08 26
 -2 -5 1 220.38 23
 1 5 -1 1501.15 142.89
 1 5 -1 1257.27 136.39
 -1 -5 1 1413.96 135.99
 -1 -5 1 1476.05 139.69
 0 5 -1 1332.27 137.99
 0 -5 1 1283.47 134.79
 0 -5 1 1416.16 130.99
 0 -5 1 1400.56 130.59
 -1 5 -1 687.33 75.99
 -1 5 -1 673.13 68.79
 -1 5 -1 630.54 67.69
 1 -5 1 665.23 67.29
 1 -5 1 712.03 72.89
 1 -5 1 778.22 67.49
 -2 5 -1 1825.72 162.48
 -2 5 -1 1517.85 162.38
 -2 5 -1 1758.82 173.08
 2 -5 1 1807.82 161.98
 2 -5 1 1555.04 161.88
 2 -5 1 1665.13 168.38
 -3 5 -1 141.69 26.1
 -3 5 -1 153.78 16.2
 3 -5 1 123.99 15.6
 3 -5 1 152.88 22.5
 3 -5 1 152.48 15.7
 -4 5 -1 1052.69 120.09
 -4 5 -1 1137.69 106.49
 4 -5 1 979.4 105.99
 4 -5 1 1022.2 106.09
 4 -5 1 1164.78 105.99
 4 -5 1 1225.08 115.99
 -5 5 -1 42.6 7.9
 -5 5 -1 47.8 19.5
 5 -5 1 45.4 6.8
 5 -5 1 45.8 8.2
 5 -5 1 27.5 12.3
 5 -5 1 34.8 6.7
 -6 5 -1 146.49 16.3
 -6 5 -1 99.49 28.9
 6 -5 1 138.59 14.6
 6 -5 1 95.29 14.7
 6 -5 1 133.89 15.8
 6 -5 1 137.49 26.2
 -7 5 -1 2.6 6.2
 -7 5 -1 3.2 31.3
 -7 5 -1 3.7 15.8
 7 -5 1 2.3 11.6
 7 -5 1 3.5 4.1
 7 -5 1 6.8 5.9
 7 -5 1 3.9 4.9
 -8 5 -1 32.6 10.3
 -8 5 -1 31.8 25.1
 -8 5 -1 36.2 38.4
 8 -5 1 39.8 7.7
 8 -5 1 35.2 18.1
 8 -5 1 36.3 8.9
 9 4 -1 642.44 68.29
 9 4 -1 583.64 59.79
 8 4 -1 93.19 17.7
 8 4 -1 98.89 12.5
 -8 -4 1 49.2 33.5
 -8 -4 1 102.99 14
 -8 -4 1 108.19 13.8
 7 4 -1 947.01 95.89
 7 4 -1 1082.59 92.79
 -7 -4 1 763.22 114.69
 6 4 -1 423.46 43.1
 6 4 -1 461.75 46.1
 -6 -4 1 502.35 44.4
 -6 -4 1 436.76 42.7
 -6 -4 1 310.67 60.69
 5 4 -1 148.09 21.5
 5 4 -1 191.38 20.2
 -5 -4 1 133.79 34.1
 -5 -4 1 240.48 21.2
 -5 -4 1 213.38 20
 4 4 -1 347.07 38.4
 4 4 -1 370.26 37.4
 -4 -4 1 461.55 38.1
 -4 -4 1 284.97 48.5
 -4 -4 1 387.26 37.1
 3 4 -1 163.98 16
 -3 -4 1 135.49 15.7
 -3 -4 1 122.99 24.3
 -3 -4 1 158.18 15.6
 2 4 -1 347.37 37.2
 2 4 -1 397.06 40.9
 -2 -4 1 367.06 42.4
 -2 -4 1 391.06 37
 -2 -4 1 363.06 37.2
 1 4 -1 34.7 5.3
 1 4 -1 31.5 8.1
 -1 -4 1 36.2 4.9
 -1 -4 1 33.8 5.4
 -1 -4 1 35.6 7.2
 0 4 -1 1956.6 203.68
 0 4 -1 2247.98 209.48
 0 -4 1 2228.98 203.78
 0 -4 1 2087.49 203.38
 0 -4 1 2116.99 206.98
 -1 4 -1 1163.88 118.79
 -1 4 -1 1078.79 111.99
 -1 4 -1 1185.58 113.39
 1 -4 1 1185.08 111.79
 1 -4 1 1140.09 116.29
 1 -4 1 1209.08 111.69
 -2 4 -1 2063.89 217.08
 -2 4 -1 2249.68 225.48
 -2 4 -1 2454.15 217.18
 2 -4 1 2292.57 216.78
 2 -4 1 2253.87 216.78
 2 -4 1 2289.77 222.68
 -3 4 -1 2253.27 242.78
 -3 4 -1 2396.26 233.38
 3 -4 1 2425.56 233.28
 3 -4 1 2554.04 233.18
 3 -4 1 2551.94 240.38
 -4 4 -1 482.65 44.3
 -4 4 -1 436.56 55.29
 4 -4 1 402.56 44
 4 -4 1 476.25 43.9
 4 -4 1 442.86 51.29
 4 -4 1 421.16 44.1
 -5 4 -1 730.33 66.69
 5 -4 1 561.44 65.89
 5 -4 1 744.13 75.69
 5 -4 1 616.14 66.09
 5 -4 1 733.23 65.79
 -6 4 -1 42 8.2
 -6 4 -1 56.59 21
 6 -4 1 46.5 8.5
 6 -4 1 44.2 7.7
 6 -4 1 41.6 15.8
 6 -4 1 51.49 7.4
 -7 4 -1 0 12
 -7 4 -1 7.1 5.6
 7 -4 1 2.9 4.6
 7 -4 1 2.5 3.5
 7 -4 1 1.5 3.5
 7 -4 1 5.2 9.9
 -8 4 -1 22.5 35.6
 -8 4 -1 23.4 22.2
 -8 4 -1 17 7.5
 8 -4 1 30.9 16.2
 8 -4 1 15.6 5.6
 8 -4 1 19.4 7.5
 -9 4 -1 100.09 57.09
 -9 4 -1 119.79 42.7
 -9 4 -1 153.98 21.2
 9 -4 1 140.39 19.8
 9 3 -1 64.69 14.5
 9 3 -1 43.3 7.3
 -9 -3 1 10.3 36.8
 -9 -3 1 28.5 8.5
 -9 -3 1 42.1 8.9
 8 3 -1 1549.54 147.79
 8 3 -1 1311.37 150.78
 -8 -3 1 1624.74 149.69
 -8 -3 1 1627.84 149.29
 7 3 -1 6.4 5.8
 7 3 -1 10.8 3.4
 -7 -3 1 5.2 19.8
 -7 -3 1 14.3 4.5
 -7 -3 1 9.7 4.6
 6 3 -1 1475.95 149.69
 6 3 -1 1637.04 152.48
 -6 -3 1 1586.74 150.78
 5 3 -1 224.38 26
 5 3 -1 241.98 24.3
 -5 -3 1 274.87 25.3
 -5 -3 1 191.78 38.8
 -5 -3 1 239.48 24.1
 4 3 -1 99.49 11.6
 4 3 -1 99.79 12.8
 -4 -3 1 97.49 12
 -4 -3 1 125.69 11.6
 -4 -3 1 102.49 24.6
 3 3 -1 222.18 25.6
 3 3 -1 280.47 25.1
 -3 -3 1 207.18 34.3
 -3 -3 1 267.17 25.4
 -3 -3 1 250.17 24.8
 2 3 -1 121.29 14.1
 2 3 -1 105.99 11.8
 -2 -3 1 97.09 11.5
 -2 -3 1 115.49 19.6
 -2 -3 1 111.79 11.9
 1 3 -1 535.05 52.79
 1 3 -1 456.75 49.7
 -1 -3 1 497.95 51.29
 -1 -3 1 500.65 49.6
 -1 -3 1 560.94 51.99
 0 3 -1 15.7 2.9
 0 -3 1 16.5 4.6
 0 -3 1 17.5 2.7
 0 -3 1 15.5 3.1
 -1 3 -1 2558.84 250.57
 -1 3 -1 2687.33 255.97
 -1 3 -1 2751.92 250.57
 1 -3 1 2597.54 250.37
 1 -3 1 2530.25 254.17
 -2 3 -1 711.93 70.69
 -2 3 -1 741.63 77.39
 2 -3 1 735.13 75.49
 2 -3 1 747.23 70.59
 2 -3 1 722.83 70.59
 -3 3 -1 5110.19 531.05
 -3 3 -1 5633.24 523.35
 3 -3 1 6044.2 523.25
 3 -3 1 5740.53 529.45
 3 -3 1 5404.96 523.25
 3 -3 1 5022.8 523.15
 -4 3 -1 1918.41 179.78
 -4 3 -1 1831.02 189.48
 4 -3 1 1669.43 179.48
 4 -3 1 1993.8 186.78
 4 -3 1 1953.6 179.38
 -5 3 -1 1167.58 129.99
 -5 3 -1 1286.57 119.09
 5 -3 1 1250.17 126.29
 5 -3 1 1075.19 118.59
 5 -3 1 1346.07 118.29
 -6 3 -1 165.88 18
 -6 3 -1 137.89 28.4
 6 -3 1 166.98 25.5
 6 -3 1 140.39 17.2
 6 -3 1 114.89 16.7
 6 -3 1 189.48 16.9
 -7 3 -1 17.5 13.4
 -7 3 -1 4.9 4.7
 7 -3 1 8.8 3.9
 7 -3 1 3.8 4.5
 7 -3 1 8.1 9.9
 -8 3 -1 105.69 15.8
 -8 3 -1 106.49 47.4
 -8 3 -1 76.49 28.3
 8 -3 1 105.19 15.4
 8 -3 1 147.59 14.5
 8 -3 1 107.49 24.8
 -9 3 -1 -11.8 37.9
 -9 3 -1 -3.1 8.1
 -9 3 -1 13.7 21.5
 9 -3 1 -2.6 5.5
 9 -3 1 -1.3 5.9
 9 2 -1 332.87 40.4
 9 2 -1 389.46 36.1
 -9 -2 1 399.06 38
 -9 -2 1 249.28 74.99
 -9 -2 1 312.77 39.3
 8 2 -1 424.86 42.4
 -8 -2 1 515.65 45
 -8 -2 1 304.27 70.99
 -8 -2 1 422.96 43.9
 7 2 -1 2041.4 207.78
 7 2 -1 2063.19 204.98
 -7 -2 1 2217.88 206.78
 -7 -2 1 2253.47 206.48
 6 2 -1 77.79 11.1
 6 2 -1 76.19 8.6
 -6 -2 1 69.79 9.7
 -6 -2 1 80.99 10.1
 -6 -2 1 56.29 25.6
 5 2 -1 1376.76 128.59
 -5 -2 1 1287.97 148.39
 4 2 -1 22.3 5.3
 4 2 -1 25.1 3.6
 -4 -2 1 19.6 3.4
 -4 -2 1 30 4.5
 3 2 -1 273.67 30.9
 3 2 -1 336.57 30.3
 -3 -2 1 308.27 30.7
 -3 -2 1 307.57 30.1
 2 2 -1 36.4 4.6
 -2 -2 1 31.1 4.2
 -2 -2 1 31 3.9
 1 2 -1 224.08 24.5
 1 2 -1 263.47 26.3
 -1 -2 1 232.08 25.3
 -1 -2 1 246.18 24.6
 -1 -2 1 257.07 24.5
 -1 -2 1 290.17 29
 0 2 -1 1683.73 155.38
 0 2 -1 1599.24 152.48
 0 -2 1 1449.65 152.38
 0 -2 1 1659.43 154.68
 -1 2 -1 1112.29 113.69
 -1 2 -1 1159.08 109.89
 -1 2 -1 1126.09 109.99
 1 -2 1 1136.09 109.89
 1 -2 1 1180.88 113.19
 1 -2 1 1175.28 109.79
 -2 2 -1 8007.5 724.23
 -2 2 -1 7677.43 718.43
 2 -2 1 7079.29 718.43
 2 -2 1 7459.05 718.53
 -3 2 -1 188.28 26.1
 -3 2 -1 224.28 20.7
 3 -2 1 200.58 24.9
 3 -2 1 194.18 20.5
 -4 2 -1 4455.25 436.86
 -4 2 -1 4838.92 428.86
 -4 2 -1 4590.14 428.86
 4 -2 1 4877.41 434.86
 4 -2 1 4284.87 428.56
 4 -2 1 3931.51 428.56
 -5 2 -1 232.98 32.3
 -5 2 -1 235.88 23.3
 -5 2 -1 259.87 23.2
 5 -2 1 180.38 22.4
 5 -2 1 197.18 22.7
 5 -2 1 212.78 28.3
 -6 2 -1 276.97 42.4
 -6 2 -1 327.87 33.2
 -6 2 -1 390.86 33.2
 6 -2 1 338.37 39.7
 6 -2 1 257.77 32.3
 -7 2 -1 5.5 4
 -7 2 -1 12.8 5.3
 -7 2 -1 -0.1 9.8
 7 -2 1 1.9 7.9
 7 -2 1 8 3.7
 -8 2 -1 1 4.1
 -8 2 -1 0.9 12.5
 -8 2 -1 5.1 5.8
 -8 2 -1 11 26.9
 8 -2 1 -2.4 8.7
 8 -2 1 -0.5 4.8
 -9 2 -1 225.68 29.7
 -9 2 -1 269.57 29.3
 -9 2 -1 167.78 42.4
 -9 2 -1 165.08 67.19
 9 -2 1 316.17 36.7
 9 -2 1 279.27 25.5
 9 1 -1 423.86 44.5
 9 1 -1 382.96 39.5
 -9 -1 1 498.85 47.6
 -9 -1 1 260.57 77.09
 -9 -1 1 418.96 42.5
 8 1 -1 576.44 57.49
 8 1 -1 559.54 53.89
 -8 -1 1 607.64 55.79
 -8 -1 1 453.85 59.79
 -8 -1 1 676.43 56.69
 -8 -1 1 432.46 84.49
 7 1 -1 413.56 48.6
 7 1 -1 493.55 46.2
 -7 -1 1 397.26 71.99
 -7 -1 1 545.65 48
 -7 -1 1 582.74 48.6
 -7 -1 1 392.26 51.59
 6 1 -1 1104.89 112.49
 -6 -1 1 1225.68 114.09
 -6 -1 1 1292.97 113.99
 -6 -1 1 1085.79 121.99
 5 1 -1 984.8 96.49
 5 1 -1 899.71 98.09
 -5 -1 1 1064.19 97.79
 -5 -1 1 1067.49 97.69
 -5 -1 1 1014.6 100.99
 4 1 -1 1976.1 208.58
 4 1 -1 2271.47 207.68
 -4 -1 1 1924.21 209.98
 -4 -1 1 2441.76 208.38
 -4 -1 1 2272.67 208.28
 3 1 -1 268.17 30.9
 3 1 -1 316.37 30.1
 -3 -1 1 307.27 30
 -3 -1 1 304.97 30.7
 -3 -1 1 338.57 31.9
 2 1 -1 11.1 2.5
 2 1 -1 14.5 2.1
 -2 -1 1 18.1 2.1
 1 1 -1 7.3 1.3
 1 1 -1 11.4 1.7
 -1 -1 1 12.1 1.6
 -1 -1 1 8.6 1.5
 -1 -1 1 9.6 1.4
 0 -1 1 2457.35 240.68
 -1 1 -1 2205.58 202.88
 -1 1 -1 2165.68 205.88
 1 -1 1 2135.39 205.48
 1 -1 1 2021.6 202.88
 -2 1 -1 4073.69 386.16
 -2 1 -1 4416.66 390.46
 -2 1 -1 4205.88 386.16
 2 -1 1 3720.03 386.06
 2 -1 1 3873.51 386.06
 -3 1 -1 2414.96 225.08
 -3 1 -1 2259.17 219.58
 3 -1 1 2230.48 219.48
 3 -1 1 2658.43 224.18
 3 -1 1 1948.41 219.38
 -4 1 -1 385.96 40.5
 -4 1 -1 444.56 40.6
 -4 1 -1 392.36 46.5
 4 -1 1 450.65 45.3
 4 -1 1 373.26 40.4
 -5 1 -1 1316.17 150.28
 -5 1 -1 1619.74 143.39
 -5 1 -1 1503.65 143.29
 5 -1 1 1266.87 142.99
 5 -1 1 1723.13 149.09
 -6 1 -1 15.6 10.3
 -6 1 -1 16.9 4.3
 -6 1 -1 6.8 3.6
 6 -1 1 4.7 3.2
 6 -1 1 9.3 6.4
 -7 1 -1 26.4 6.1
 -7 1 -1 49.1 28
 -7 1 -1 51.29 8.5
 -7 1 -1 19.2 11.9
 7 -1 1 17.8 5.8
 7 -1 1 38.9 12.1
 7 -1 1 42.4 5.1
 -8 1 -1 3.4 12
 -8 1 -1 3.7 23.2
 -8 1 -1 6.2 5.2
 -8 1 -1 8 4.8
 8 -1 1 5.2 2.8
 8 -1 1 6 8.9
 8 -1 1 2.5 4.9
 -9 1 -1 12.2 33.6
 -9 1 -1 30.5 8
 -9 1 -1 13.3 7.5
 9 -1 1 28.7 8.4
 9 -1 1 21.4 4.8
 -10 1 -1 252.67 29.2
 -10 1 -1 161.78 43.9
 10 -1 1 260.97 24.8
 10 0 -1 132.49 15.4
 -10 0 1 203.48 21.9
 -10 0 1 102.99 30.2
 9 0 -1 6.3 3.2
 9 0 -1 5.3 7.5
 -9 0 1 0 4.6
 -9 0 1 9.6 30.2
 -9 0 1 12.4 14.1
 -9 0 1 8.7 7
 8 0 -1 695.03 74.39
 8 0 -1 720.93 71.29
 -8 0 1 589.24 103.79
 -8 0 1 895.71 73.89
 -8 0 1 831.12 74.09
 -8 0 1 652.13 81.79
 7 0 -1 352.06 35
 7 0 -1 302.77 37.2
 -7 0 1 324.57 44
 -7 0 1 429.96 37.2
 -7 0 1 386.46 37.2
 6 0 -1 1990.4 215.18
 6 0 -1 2278.37 213.28
 -6 0 1 2375.76 214.78
 -6 0 1 2119.09 221.08
 -6 0 1 2408.86 214.98
 5 0 -1 1012.9 113.49
 5 0 -1 1101.09 111.99
 5 0 -1 1243.18 115.89
 -5 0 1 1173.58 118.39
 -5 0 1 1273.67 113.39
 -5 0 1 1227.28 113.39
 4 0 -1 1506.65 143.69
 4 0 -1 1426.06 142.09
 4 0 -1 1462.95 140.69
 -4 0 1 1497.75 141.69
 -4 0 1 1462.65 141.79
 -4 0 1 1488.55 145.39
 3 0 -1 60.99 8.4
 3 0 -1 73.99 7.5
 3 0 -1 77.29 9.7
 -3 0 1 86.79 10.7
 -3 0 1 66.39 8.3
 -3 0 1 75.29 8.3
 2 0 -1 486.75 48.4
 2 0 -1 486.95 47.8
 2 0 -1 488.95 49.3
 -2 0 1 550.84 49.8
 -2 0 1 471.65 48.3
 -2 0 1 512.85 48.4
 1 0 -1 1248.28 121.69
 -1 0 1 1482.85 122.39
 -1 0 1 1210.48 121.69
 -1 0 1 1158.58 121.59
 -1 0 -1 3899.41 412.36
 -1 0 -1 4750.52 415.86
 -2 0 -1 24.8 3.4
 -2 0 -1 41.6 3.9
 -2 0 -1 30.2 6
 2 0 1 25.9 5.3
 2 0 1 28.4 3.7
 -3 0 -1 1615.44 173.08
 -3 0 -1 1787.52 177.28
 3 0 1 1777.82 173.48
 3 0 1 2065.69 176.58
 -4 0 -1 1466.75 140.19
 -4 0 -1 1458.45 140.19
 -4 0 -1 1530.95 146.19
 4 0 1 1379.36 140.39
 -5 0 -1 405.46 39.4
 -5 0 -1 432.96 39.6
 -5 0 -1 315.57 44.2
 5 0 1 343.17 39.6
 5 0 1 421.96 38.4
 5 0 1 431.46 43.1
 -6 0 -1 1301.17 118.99
 -6 0 -1 1430.26 119.19
 -6 0 -1 1175.68 126.59
 -6 0 -1 1061.49 140.39
 6 0 1 1198.38 122.39
 6 0 1 1094.09 119.19
 6 0 1 1268.07 117.59
 -7 0 -1 4 2.9
 -7 0 -1 -0.4 7.7
 -7 0 -1 3.4 3.4
 -7 0 -1 -3.8 17.4
 7 0 1 0.5 3.6
 7 0 1 6.6 6.2
 7 0 1 6.1 2.5
 -8 0 -1 0.5 10.2
 -8 0 -1 3.5 21.5
 -8 0 -1 5.3 3.8
 -8 0 -1 11.1 5.6
 8 0 1 1.5 5
 8 0 1 3.4 2.7
 8 0 1 2.4 6.2
 -9 0 -1 12.4 13.9
 -9 0 -1 5.8 33.5
 -9 0 -1 25.4 7.6
 -9 0 -1 7.2 5.5
 9 0 1 10.6 3.7
 9 0 1 8 7.2
 -10 0 -1 207.58 25.5
 -10 0 -1 151.58 36
 10 0 1 238.88 36.5
 10 0 1 214.98 21.5
 10 -1 -1 2.2 3.9
 10 -1 -1 -0.5 6.5
 -10 1 1 47 11.7
 -10 1 1 46.5 21.5
 9 -1 -1 644.54 58.59
 9 -1 -1 551.54 62.19
 -9 1 1 654.93 61.99
 -9 1 1 677.53 61.89
 -9 1 1 518.15 72.99
 -9 1 1 476.95 98.99
 8 -1 -1 182.08 23.6
 8 -1 -1 195.78 20.4
 -8 1 1 263.87 24.2
 -8 1 1 203.78 22.9
 -8 1 1 182.18 34.2
 7 -1 -1 1119.99 106.99
 7 -1 -1 1033 109.29
 -7 1 1 975.3 117.69
 -7 1 1 1200.28 108.99
 -7 1 1 1254.97 109.59
 6 -1 -1 3 1.6
 6 -1 -1 5 5.3
 6 -1 -1 2 2.7
 -6 1 1 9.2 3.5
 -6 1 1 7.4 8.2
 -6 1 1 5.2 3.3
 5 -1 -1 2224.28 206.98
 5 -1 -1 1943.81 202.88
 -5 1 1 2096.39 202.78
 -5 1 1 2192.88 209.88
 -5 1 1 2108.69 202.98
 4 -1 -1 267.37 26.1
 4 -1 -1 233.68 28.7
 4 -1 -1 249.08 26.2
 -4 1 1 264.67 26
 -4 1 1 277.87 31.2
 -4 1 1 248.78 26.1
 3 -1 -1 1049.7 100.39
 3 -1 -1 952.1 100.59
 -3 1 1 1166.28 104.69
 -3 1 1 1043.8 100.39
 -3 1 1 1009.6 100.59
 2 -1 -1 12.2 2.5
 2 -1 -1 14.1 2.3
 2 -1 -1 11.4 3.8
 -2 1 1 24 2.6
 -2 1 1 23.9 3
 -2 1 1 17 4.4
 1 -1 -1 3 0.8
 1 -1 -1 5.6 1.1
 1 -1 -1 4.7 0.8
 1 -1 -1 5.9 2.2
 -1 1 1 3.4 0.8
 -1 1 1 2.7 1.6
 0 -1 -1 3545.35 355.66
 0 1 1 3726.03 356.16
 -1 -1 -1 448.66 45.6
 -1 -1 -1 472.25 45.5
 -1 -1 -1 549.95 51.39
 1 1 1 444.16 45.6
 1 1 1 476.85 45.5
 -2 -1 -1 3694.13 354.26
 -2 -1 -1 4201.78 352.56
 -2 -1 -1 3710.33 352.86
 -2 -1 -1 3521.25 361.36
 2 1 1 3312.27 352.86
 2 1 1 3769.72 352.56
 -3 -1 -1 64.19 8.3
 -3 -1 -1 63.99 10.3
 -3 -1 -1 62.59 16.9
 3 1 1 75.49 8.7
 3 1 1 80.99 7.9
 3 1 1 91.59 10.3
 -4 -1 -1 2412.26 268.37
 -4 -1 -1 2392.76 256.27
 -4 -1 -1 2919.31 253.47
 4 1 1 2951.2 252.57
 4 1 1 2531.65 253.67
 -5 -1 -1 481.75 46.9
 -5 -1 -1 494.05 47
 -5 -1 -1 440.26 64.39
 -5 -1 -1 397.56 50.29
 5 1 1 477.95 48.7
 5 1 1 497.45 47.8
 5 1 1 510.65 46
 -6 -1 -1 1007.8 100.49
 -6 -1 -1 1135.19 100.89
 -6 -1 -1 781.32 118.99
 6 1 1 986.6 101.39
 6 1 1 1139.99 102.89
 6 1 1 1054.89 99.39
 -7 -1 -1 323.07 30.8
 -7 -1 -1 228.18 35.2
 -7 -1 -1 236.68 53.59
 -7 -1 -1 318.77 31.1
 7 1 1 248.58 31.3
 7 1 1 354.86 33.5
 7 1 1 287.37 29.2
 -8 -1 -1 0.3 23.5
 -8 -1 -1 1 8.2
 -8 -1 -1 4.8 4.8
 -8 -1 -1 12.4 4.8
 8 1 1 6.5 3.2
 8 1 1 3.7 5.5
 -9 -1 -1 44.5 9
 -9 -1 -1 22.3 8.1
 -9 -1 -1 21.3 13.9
 -9 -1 -1 4.7 32.6
 9 1 1 19.2 8.4
 9 1 1 27.4 5.2
 -10 -1 -1 4.1 8.1
 10 1 1 -2.3 4.8
 9 -2 -1 354.96 36
 9 -2 -1 438.36 48.4
 9 -2 -1 451.25 37.5
 -9 2 1 278.07 52.29
 -9 2 1 361.96 39.8
 -9 2 1 311.77 40.8
 8 -2 -1 766.02 63.89
 8 -2 -1 514.75 65.09
 8 -2 -1 629.84 62.89
 -8 2 1 664.63 65.19
 -8 2 1 664.83 65.99
 7 -2 -1 1079.49 118.99
 7 -2 -1 1354.06 126.49
 -7 2 1 1271.47 119.59
 -7 2 1 1294.17 119.09
 -7 2 1 1097.99 130.09
 6 -2 -1 1441.36 158.48
 6 -2 -1 1700.33 164.78
 -6 2 1 1850.71 158.98
 -6 2 1 1557.54 168.38
 -6 2 1 1671.33 159.08
 5 -2 -1 56.39 8.1
 5 -2 -1 68.09 13.2
 5 -2 -1 52.19 8.7
 -5 2 1 73.29 9.2
 -5 2 1 62.69 14.8
 -5 2 1 74.39 8.6
 4 -2 -1 848.32 87.89
 4 -2 -1 804.52 83.29
 4 -2 -1 914.41 82.79
 4 -2 -1 775.52 83.59
 -4 2 1 872.41 90.19
 -4 2 1 925.01 83.59
 -4 2 1 882.71 83.89
 3 -2 -1 155.78 18.7
 3 -2 -1 225.48 18.6
 3 -2 -1 177.08 22.4
 3 -2 -1 169.08 19
 -3 2 1 188.48 23.9
 -3 2 1 196.38 19.2
 2 -2 -1 166.38 15.6
 2 -2 -1 153.28 16.5
 2 -2 -1 152.08 18.7
 2 -2 -1 148.19 15.7
 -2 2 1 154.18 19.6
 -2 2 1 163.28 16
 1 -2 -1 291.17 32.9
 1 -2 -1 330.17 30.7
 1 -2 -1 325.87 30.4
 -1 2 1 299.67 33.4
 -1 2 1 307.47 30.5
 -1 2 1 327.67 30.7
 0 -2 -1 371.26 35.9
 0 -2 -1 392.56 37.2
 0 -2 -1 359.66 35.7
 0 -2 -1 384.46 37.7
 0 2 1 370.76 37.8
 0 2 1 353.66 35.7
 0 2 1 348.47 37.2
 -1 -2 -1 2847.42 250.67
 -1 -2 -1 2437.56 246.28
 -1 -2 -1 2502.15 246.18
 1 2 1 2511.55 247.38
 1 2 1 2634.94 246.28
 -2 -2 -1 1203.48 117.49
 -2 -2 -1 1091.69 107.89
 2 2 1 1104.69 107.69
 2 2 1 1112.99 108.09
 -3 -2 -1 4656.23 432.56
 -3 -2 -1 4397.66 444.96
 -3 -2 -1 4904.11 432.06
 3 2 1 3939.01 432.56
 3 2 1 4771.02 432.06
 -4 -2 -1 381.66 39.7
 -4 -2 -1 462.45 39.1
 -4 -2 -1 350.76 52.99
 4 2 1 363.16 38.9
 4 2 1 361.16 40
 4 2 1 431.66 39.6
 -5 -2 -1 3643.44 354.16
 -5 -2 -1 3199.18 371.76
 5 2 1 3796.22 355.06
 5 2 1 4029.8 354.06
 5 2 1 3775.82 353.36
 -6 -2 -1 5.6 14.7
 -6 -2 -1 14.3 4.1
 6 2 1 18.3 3.7
 6 2 1 17 5.7
 -7 -2 -1 574.84 51.79
 -7 -2 -1 531.35 51.69
 -7 -2 -1 405.56 74.59
 7 2 1 509.15 50.29
 7 2 1 493.05 52.89
 -8 -2 -1 4.8 23.6
 -8 -2 -1 0 3.8
 -8 -2 -1 2 4.6
 8 2 1 -0.7 2.9
 8 2 1 2.2 4.7
 -9 -2 -1 5.9 31.3
 -9 -2 -1 37.5 8.7
 -9 -2 -1 37.9 8.9
 9 2 1 41.9 7.5
 9 -3 -1 47.1 11.2
 9 -3 -1 53.29 9.3
 9 -3 -1 60.79 7.9
 -9 3 1 52.79 26.2
 -9 3 1 51.89 46.1
 -9 3 1 38.5 10.8
 8 -3 -1 1166.58 123.49
 -8 3 1 1374.86 124.09
 -8 3 1 1241.58 140.69
 7 -3 -1 470.55 57.19
 7 -3 -1 636.54 67.79
 7 -3 -1 676.93 56.39
 -7 3 1 470.35 69.69
 -7 3 1 583.94 58.19
 6 -3 -1 1353.26 133.39
 6 -3 -1 1437.76 124.69
 6 -3 -1 1122.79 125.69
 -6 3 1 1373.46 126.29
 -6 3 1 1161.88 136.69
 5 -3 -1 1048.6 119.79
 5 -3 -1 1365.96 119.39
 5 -3 -1 1348.27 127.39
 5 -3 -1 1185.98 120.49
 -5 3 1 1213.38 130.29
 -5 3 1 1290.57 120.69
 4 -3 -1 1059.49 95.29
 4 -3 -1 1097.89 102.39
 4 -3 -1 952.7 96.09
 4 -3 -1 866.81 95.69
 -4 3 1 1049.4 96.29
 -4 3 1 917.71 103.79
 3 -3 -1 513.05 51.79
 3 -3 -1 625.34 51.39
 3 -3 -1 465.05 55.79
 3 -3 -1 481.35 51.49
 -3 3 1 505.55 58.09
 -3 3 1 577.54 51.99
 2 -3 -1 277.87 27.2
 2 -3 -1 266.87 31
 2 -3 -1 264.27 26.7
 -2 3 1 274.17 27
 -2 3 1 259.97 32.1
 -2 3 1 283.37 27.2
 1 -3 -1 26.7 4.2
 1 -3 -1 36.9 7.2
 1 -3 -1 28.8 4
 -1 3 1 33.7 7.5
 -1 3 1 33.3 4.2
 -1 3 1 31.9 4.4
 0 -3 -1 29.8 6
 0 -3 -1 27.6 4
 0 -3 -1 24 3.7
 0 3 1 27.5 3.9
 0 3 1 29.9 5.7
 -1 -3 -1 900.71 83.49
 -1 -3 -1 953.9 86.99
 1 3 1 816.62 83.49
 1 3 1 801.92 85.39
 -2 -3 -1 885.71 84.69
 -2 -3 -1 953.6 93.39
 -2 -3 -1 845.92 84.89
 2 3 1 881.31 85.79
 2 3 1 844.52 84.79
 -3 -3 -1 1297.97 145.99
 -3 -3 -1 1401.76 134.59
 -3 -3 -1 1404.46 134.19
 3 3 1 1480.15 134.39
 3 3 1 1400.26 135.09
 -4 -3 -1 2770.52 235.38
 -4 -3 -1 2619.14 236.08
 -4 -3 -1 2130.59 249.58
 4 3 1 2689.03 235.48
 4 3 1 2051.29 236.18
 -5 -3 -1 1251.97 105.89
 -5 -3 -1 1113.39 104.59
 5 3 1 962.2 104.59
 5 3 1 1033.5 106.29
 -6 -3 -1 1536.65 125.69
 -6 -3 -1 1042 143.69
 6 3 1 1269.57 123.99
 6 3 1 1263.67 126.29
 -7 -3 -1 34.8 24.9
 -7 -3 -1 59.99 9
 7 3 1 57.69 11.3
 7 3 1 47.9 7.3
 -8 -3 -1 140.99 16.4
 -8 -3 -1 97.09 40.4
 -8 -3 -1 133.09 15.7
 8 3 1 84.29 18
 8 3 1 131.69 14.4
 -9 -3 -1 49.5 10.9
 -9 -3 -1 49.9 10
 -9 -3 -1 20.2 33.9
 9 3 1 49 8.9
 9 3 1 40.2 11
 9 -4 -1 196.78 25.8
 -9 4 1 240.58 27.4
 -9 4 1 173.08 68.39
 -9 4 1 181.98 49.6
 8 -4 -1 4.8 5.9
 8 -4 -1 3.7 4
 -8 4 1 3.4 17.2
 -8 4 1 6.1 6.9
 7 -4 -1 1088.09 121.69
 7 -4 -1 1262.87 120.49
 7 -4 -1 1467.75 133.99
 7 -4 -1 1173.68 122.19
 -7 4 1 1132.89 137.89
 -7 4 1 1382.66 122.79
 6 -4 -1 63.99 17
 6 -4 -1 70.99 10.7
 6 -4 -1 73.29 8.7
 6 -4 -1 57.09 9.6
 -6 4 1 71.19 11
 -6 4 1 73.19 21.1
 5 -4 -1 1933.21 201.48
 5 -4 -1 2317.27 210.48
 5 -4 -1 2299.77 200.88
 5 -4 -1 1886.61 201.68
 -5 4 1 2135.49 201.98
 -5 4 1 2004.2 213.78
 4 -4 -1 432.76 46.4
 4 -4 -1 511.55 46.1
 4 -4 -1 438.06 46.7
 4 -4 -1 472.05 53.19
 -4 4 1 503.25 47
 -4 4 1 449.95 56.29
 3 -4 -1 857.21 73.89
 3 -4 -1 769.02 74.19
 3 -4 -1 777.92 80.19
 3 -4 -1 745.43 74.29
 -3 4 1 747.43 74.29
 -3 4 1 661.23 81.69
 2 -4 -1 401.96 39.8
 2 -4 -1 391.36 44.6
 2 -4 -1 422.16 39.6
 -2 4 1 373.86 39.7
 -2 4 1 403.96 40
 -2 4 1 421.26 47.2
 1 -4 -1 113.49 15.6
 1 -4 -1 109.79 11.4
 1 -4 -1 106.19 11.7
 -1 4 1 100.79 16.5
 -1 4 1 114.69 12
 -1 4 1 94.29 14
 -1 4 1 108.69 11.8
 0 -4 -1 552.34 58.29
 0 -4 -1 533.35 55.09
 0 -4 -1 560.74 54.79
 0 4 1 551.64 55.09
 0 4 1 612.24 57.69
 0 4 1 561.74 59.39
 -1 -4 -1 4.1 1.9
 -1 -4 -1 3.5 3.4
 1 4 1 5.1 2.1
 1 4 1 4.5 3.7
 1 4 1 6 5.7
 -2 -4 -1 3098.29 290.87
 -2 -4 -1 2820.22 284.17
 -2 -4 -1 3187.08 284.57
 2 4 1 2836.92 284.37
 2 4 1 2949.21 286.57
 -3 -4 -1 194.08 22.1
 -3 -4 -1 212.68 22.6
 -3 -4 -1 214.88 32
 3 4 1 223.88 23.5
 3 4 1 247.98 22.8
 -4 -4 -1 2524.05 218.38
 -4 -4 -1 2178.78 217.48
 4 4 1 2165.78 217.68
 4 4 1 2234.48 218.78
 -5 -4 -1 551.84 54.59
 -5 -4 -1 566.14 55.39
 5 4 1 502.75 56.19
 5 4 1 596.64 54.99
 -6 -4 -1 719.43 71.39
 -6 -4 -1 770.72 70.29
 6 4 1 717.33 70.39
 6 4 1 652.83 72.49
 -7 -4 -1 383.86 33.3
 -7 -4 -1 212.48 52.09
 7 4 1 294.47 34.6
 7 4 1 305.27 31.7
 -8 -4 -1 118.79 15.7
 -8 -4 -1 129.89 15.3
 -8 -4 -1 60.79 32.4
 8 4 1 114.59 14.1
 8 4 1 118.19 18.5
 -9 -4 -1 10.8 8.6
 -9 -4 -1 12.1 7.3
 -9 -4 -1 -6.3 40.7
 9 4 1 25.5 11.5
 9 4 1 13 5.7
 8 -5 -1 281.27 26.5
 8 -5 -1 219.28 31.4
 8 -5 -1 236.38 29.4
 -8 5 1 181.58 49.4
 -8 5 1 285.57 30.7
 7 -5 -1 102.09 12.2
 7 -5 -1 100.79 14.1
 7 -5 -1 71.99 14.2
 -7 5 1 122.79 16
 -7 5 1 90.79 32.5
 6 -5 -1 1373.46 120.79
 6 -5 -1 1349.96 132.89
 6 -5 -1 1036.3 121.29
 6 -5 -1 1146.39 121.79
 -6 5 1 1456.75 122.69
 -6 5 1 1142.29 137.99
 5 -5 -1 8.9 3.3
 5 -5 -1 8.4 8.2
 5 -5 -1 6.2 3.8
 5 -5 -1 10 4
 -5 5 1 10.5 4.7
 -5 5 1 4.3 9.6
 4 -5 -1 2235.88 199.28
 4 -5 -1 1879.01 199.78
 4 -5 -1 2130.69 208.08
 4 -5 -1 1941.51 199.58
 -4 5 1 2008.4 212.58
 -4 5 1 2280.47 200.28
 3 -5 -1 225.58 23.3
 3 -5 -1 218.78 22.7
 3 -5 -1 220.68 29.6
 -3 5 1 235.08 23.5
 -3 5 1 203.58 32.4
 2 -5 -1 527.95 54.59
 2 -5 -1 574.54 60.79
 2 -5 -1 575.74 54.29
 -2 5 1 558.94 63.59
 -2 5 1 491.75 54.59
 -2 5 1 602.64 55.19
 1 -5 -1 9.8 2.9
 1 -5 -1 5.6 2.9
 1 -5 -1 9.9 5.5
 -1 5 1 5.9 5.9
 -1 5 1 27.7 4.8
 -1 5 1 15.3 6
 0 -5 -1 123.79 12.4
 0 -5 -1 107.49 12.8
 0 5 1 116.09 18
 0 5 1 116.99 15.3
 0 5 1 92.89 12.5
 -1 -5 -1 900.81 81.59
 -1 -5 -1 769.22 82.99
 -1 -5 -1 867.61 82.49
 1 5 1 846.22 81.99
 1 5 1 843.02 86.49
 -2 -5 -1 106.59 16.3
 -2 -5 -1 105.59 11.7
 -2 -5 -1 98.89 11.9
 2 5 1 113.09 15.6
 2 5 1 89.99 11.9
 -3 -5 -1 2416.46 237.98
 -3 -5 -1 2273.47 245.78
 -3 -5 -1 2624.84 238.58
 3 5 1 2507.85 238.48
 3 5 1 2606.54 241.18
 -4 -5 -1 56.29 18.8
 -4 -5 -1 59.19 8.2
 -4 -5 -1 70.49 9
 4 5 1 70.49 8.9
 -5 -5 -1 1464.55 138.39
 -5 -5 -1 1392.56 137.49
 -6 -5 -1 29.9 17.4
 -6 -5 -1 68.89 8.6
 -6 -5 -1 68.69 9.7
 6 5 1 60.79 8.8
 6 5 1 58.89 12.1
 -7 -5 -1 174.38 46.8
 -7 -5 -1 276.27 26.4
 -7 -5 -1 303.57 28.4
 7 5 1 224.78 26.6
 7 5 1 256.57 30.4
 -8 -5 -1 19.7 27.4
 -8 -5 -1 29.1 7.5
 8 5 1 9.9 9.4
 8 5 1 11.8 5.6
 8 -6 -1 217.78 30.4
 8 -6 -1 229.48 29.6
 8 -6 -1 308.07 28
 -8 6 1 288.37 32.2
 -8 6 1 199.68 56.79
 7 -6 -1 158.98 20.9
 7 -6 -1 142.69 19.2
 -7 6 1 193.88 21.6
 -7 6 1 126.49 41.8
 6 -6 -1 647.54 70.99
 6 -6 -1 630.14 71.09
 6 -6 -1 821.12 70.39
 -6 6 1 853.71 72.39
 -6 6 1 603.74 89.09
 5 -6 -1 1473.45 159.08
 5 -6 -1 1868.71 156.78
 5 -6 -1 1812.72 169.08
 5 -6 -1 1411.06 156.88
 -5 6 1 1536.65 174.68
 4 -6 -1 118.19 13.5
 4 -6 -1 126.49 22.2
 4 -6 -1 116.69 14.4
 4 -6 -1 106.19 13.7
 -4 6 1 117.99 14.8
 -4 6 1 121.69 27.3
 3 -6 -1 1899.61 172.38
 3 -6 -1 1660.43 172.68
 3 -6 -1 1744.23 183.38
 -3 6 1 1847.12 173.28
 -3 6 1 1823.92 196.38
 2 -6 -1 29.4 10.7
 2 -6 -1 26.3 5
 2 -6 -1 29.6 5.7
 -2 6 1 23.8 11.1
 -2 6 1 27.7 6
 -2 6 1 31.9 10
 1 -6 -1 100.09 12.9
 1 -6 -1 118.39 12.7
 -1 6 1 115.19 16.4
 -1 6 1 105.09 13.3
 -1 6 1 108.49 20.9
 0 -6 -1 33.2 5.7
 0 -6 -1 41.9 6.8
 0 6 1 34.4 11.9
 0 6 1 41.3 10.2
 0 6 1 28.4 6.4
 -1 -6 -1 850.61 82.39
 -1 -6 -1 904.31 81.39
 1 6 1 798.82 81.89
 1 6 1 784.82 87.69
 -2 -6 -1 517.55 58.49
 -2 -6 -1 592.84 55.99
 -2 -6 -1 573.84 56.29
 2 6 1 620.44 62.29
 2 6 1 546.55 56.59
 -3 -6 -1 1098.99 92.59
 -3 -6 -1 930.91 90.49
 -3 -6 -1 780.92 95.79
 3 6 1 1038.8 96.19
 3 6 1 847.52 90.99
 -4 -6 -1 1063.59 99.29
 -4 -6 -1 1117.09 98.79
 -4 -6 -1 860.51 106.99
 4 6 1 1025.3 99.39
 -5 -6 -1 138.59 14.5
 -5 -6 -1 139.59 15.3
 -5 -6 -1 86.49 25.2
 5 6 1 115.39 14.9
 -6 -6 -1 948.11 87.09
 -6 -6 -1 890.31 85.89
 6 6 1 803.02 86.39
 -7 -6 -1 -2.1 18
 -7 -6 -1 5.9 4.1
 -7 -6 -1 -1.7 8
 7 6 1 2.9 5
 -8 -6 -1 65.79 31.3
 8 6 1 101.49 14.2
 7 -7 -1 544.45 63.69
 7 -7 -1 705.63 62.79
 7 -7 -1 578.14 64.49
 -7 7 1 697.63 65.59
 -7 7 1 612.64 93.69
 6 -7 -1 89.49 13.8
 6 -7 -1 104.89 13.1
 6 -7 -1 80.69 15.1
 -6 7 1 99.89 15.8
 -6 7 1 113.39 38.9
 5 -7 -1 854.61 77.29
 5 -7 -1 640.24 77.29
 5 -7 -1 765.42 78.19
 -5 7 1 813.82 100.29
 -5 7 1 888.61 78.79
 4 -7 -1 587.34 53.69
 4 -7 -1 522.75 54.09
 4 -7 -1 484.95 54.19
 -4 7 1 578.44 54.89
 -4 7 1 512.55 70.99
 3 -7 -1 364.56 35.1
 3 -7 -1 298.17 35.4
 -3 7 1 338.87 42.4
 -3 7 1 315.07 49.4
 -3 7 1 402.26 36.4
 2 -7 -1 432.56 48.4
 2 -7 -1 533.05 48.3
 -2 7 1 514.65 62.59
 -2 7 1 421.66 48.9
 -2 7 1 504.15 53.49
 1 -7 -1 4.3 3.5
 1 -7 -1 3.6 3
 -1 7 1 2.7 5.5
 -1 7 1 -1.6 7.9
 -1 7 1 0.8 3.4
 0 -7 -1 106.49 11.1
 0 -7 -1 82.09 11.8
 0 7 1 82.69 11.8
 0 7 1 71.69 18.7
 -1 -7 -1 99.79 12
 -1 -7 -1 101.99 14.1
 1 7 1 92.99 13.1
 1 7 1 97.79 19.9
 -2 -7 -1 1105.19 97.69
 -2 -7 -1 1001.4 97.99
 -2 -7 -1 948.31 98.99
 2 7 1 895.71 98.29
 2 7 1 1045.2 105.99
 -3 -7 -1 463.75 42
 -3 -7 -1 333.07 43.9
 -3 -7 -1 463.55 41.4
 3 7 1 439.36 49.3
 3 7 1 376.36 41.9
 -4 -7 -1 779.92 95.59
 -4 -7 -1 1083.79 90.59
 -4 -7 -1 996.7 89.69
 4 7 1 834.92 90.19
 -5 -7 -1 697.53 63.99
 -5 -7 -1 600.84 62.79
 5 7 1 610.64 63.79
 -6 -7 -1 186.98 19.1
 -6 -7 -1 120.19 31.3
 6 7 1 185.58 20.6
 -7 -7 -1 319.17 36.5
 -7 -7 -1 401.16 38.5
 7 7 1 347.77 37.8
 6 -8 -1 948.91 85.19
 6 -8 -1 737.73 85.49
 6 -8 -1 865.81 86.69
 -6 8 1 903.11 87.19
 -6 8 1 964.1 127.79
 -6 8 1 787.62 115.19
 5 -8 -1 9.2 5.3
 5 -8 -1 15.6 8.2
 5 -8 -1 2.6 5.9
 -5 8 1 1.6 7.2
 -5 8 1 6.5 15.6
 -5 8 1 5.3 17.8
 4 -8 -1 625.34 72.99
 4 -8 -1 812.12 72.99
 4 -8 -1 718.43 73.69
 -4 8 1 726.53 95.39
 -4 8 1 802.42 83.89
 3 -8 -1 72.09 12.6
 3 -8 -1 89.39 12.2
 -3 8 1 99.49 20.2
 -3 8 1 95.39 29.5
 2 -8 -1 175.88 20.3
 2 -8 -1 190.88 19.7
 -2 8 1 167.58 34.6
 -2 8 1 149.19 20.7
 1 -8 -1 155.48 18.2
 1 -8 -1 170.18 19.2
 -1 8 1 173.98 32.4
 -1 8 1 142.09 19.8
 0 -8 -1 17.3 6.1
 0 -8 -1 15.5 4.7
 0 8 1 25 6.5
 0 8 1 17.4 13.7
 -1 -8 -1 9.3 3.9
 -1 -8 -1 16.5 5.1
 -1 -8 -1 16.2 6.2
 1 8 1 7.6 9.7
 1 8 1 13.6 5.5
 -2 -8 -1 20.5 7.3
 -2 -8 -1 28.6 6.3
 -2 -8 -1 52.59 7.6
 2 8 1 27.9 14.8
 2 8 1 34.7 8.5
 -3 -8 -1 752.32 71.79
 -3 -8 -1 776.52 71.29
 -3 -8 -1 596.44 70.89
 -3 -8 -1 664.43 72.89
 3 8 1 757.42 72.79
 3 8 1 879.11 83.89
 -4 -8 -1 100.69 13.6
 -4 -8 -1 78.69 17.2
 -4 -8 -1 91.09 12.8
 4 8 1 108.59 15.1
 4 8 1 142.99 26.4
 -5 -8 -1 972.6 86.29
 -5 -8 -1 828.72 86.49
 5 8 1 812.82 87.09
 -6 -8 -1 188.58 21.3
 -6 -8 -1 131.89 32.6
 6 8 1 253.57 24.1
 4 -9 -1 78.89 12.3
 4 -9 -1 76.89 14.3
 4 -9 -1 63.99 11.7
 -4 9 1 54.69 29.4
 -4 9 1 61.69 31.5
 3 -9 -1 580.74 61.19
 3 -9 -1 677.93 60.49
 -3 9 1 569.74 83.49
 -3 9 1 556.34 72.39
 2 -9 -1 27.8 6.8
 2 -9 -1 30.2 8.9
 -2 9 1 18.3 8.7
 -2 9 1 15.2 17.2
 1 -9 -1 85.29 12.5
 1 -9 -1 98.09 14.6
 -1 9 1 101.59 30.3
 -1 9 1 76.59 15.3
 0 -9 -1 104.89 14.9
 0 -9 -1 86.39 12.3
 0 9 1 72.59 25.2
 0 9 1 81.29 15.1
 -1 -9 -1 27.7 7.1
 -1 -9 -1 39 10.3
 -1 -9 -1 60.59 10.1
 1 9 1 50.19 21.8
 1 9 1 48.5 10.7
 -2 -9 -1 141.59 21.6
 -2 -9 -1 234.18 24.7
 -2 -9 -1 161.78 19.8
 2 9 1 147.09 32.7
 2 9 1 147.29 21.4
 -3 -9 -1 81.89 15.9
 -3 -9 -1 95.09 12.7
 -3 -9 -1 77.39 13.4
 3 9 1 83.09 16
 3 9 1 75.49 28.2
 -4 -9 -1 739.93 72.39
 -4 -9 -1 838.92 71.89
 -4 -9 -1 579.44 73.19
 4 9 1 693.23 73.59
 2 -10 -1 379.96 37.4
 2 -10 -1 297.87 38.3
 -2 10 1 386.26 65.59
 -2 10 1 345.17 41.1
 1 -10 -1 7.8 9
 1 -10 -1 2.5 5.7
 -1 10 1 -6.8 21.5
 -1 10 1 4 8.9
 0 -10 -1 43.3 9.1
 0 -10 -1 41.6 13.4
 0 10 1 16.7 11.3
 0 10 1 39.1 24.3
 -1 -10 -1 -3.5 7
 -1 -10 -1 -3 8.9
 1 10 1 3.7 20.2
 1 10 1 -1.5 9.2
 -2 -10 -1 216.78 30.5
 2 10 1 265.57 49.6
 1 10 -2 16.7 25.6
 0 10 -2 -3.9 23.4
 0 -10 2 -1.2 8.4
 -1 10 -2 308.17 60.49
 1 -10 2 285.47 33.3
 4 9 -2 120.09 19.9
 -4 -9 2 152.48 17.3
 -4 -9 2 105.29 19.7
 3 9 -2 408.86 46.4
 3 9 -2 563.34 66.09
 -3 -9 2 438.76 44
 -3 -9 2 309.17 45
 -3 -9 2 451.25 44.8
 2 9 -2 104.79 19.8
 2 9 -2 153.58 37.1
 -2 -9 2 124.79 16.7
 -2 -9 2 111.79 19.2
 -2 -9 2 163.28 18.1
 1 9 -2 6.8 8.4
 1 9 -2 -1.3 16.6
 -1 -9 2 -1.7 6.5
 0 9 -2 153.38 39.4
 0 9 -2 127.79 21.8
 0 -9 2 209.68 20.8
 0 -9 2 151.58 20.4
 -1 9 -2 71.99 28.4
 -1 9 -2 63.59 14.3
 1 -9 2 63.49 10.8
 1 -9 2 56.09 11.7
 -2 9 -2 664.23 94.49
 2 -9 2 796.12 73.69
 2 -9 2 709.13 72.49
 -3 9 -2 38.3 35.5
 3 -9 2 29.4 8.9
 3 -9 2 16.7 7.4
 5 8 -2 23.2 8.6
 -5 -8 2 31.6 7.8
 -5 -8 2 20 11.1
 -5 -8 2 37.9 10.5
 4 8 -2 820.82 92.39
 4 8 -2 666.83 70.89
 -4 -8 2 663.33 71.79
 -4 -8 2 677.73 68.99
 3 8 -2 1.1 5.1
 3 8 -2 -1.7 14.1
 -3 -8 2 7.1 4.6
 -3 -8 2 3.8 4.5
 2 8 -2 201.08 22.7
 2 8 -2 210.98 36
 -2 -8 2 201.18 20.8
 -2 -8 2 164.78 22.1
 -2 -8 2 157.98 20.8
 1 8 -2 13.7 6.6
 1 8 -2 23.8 16.3
 -1 -8 2 30.9 7.5
 -1 -8 2 53.49 10
 -1 -8 2 31.3 6
 0 8 -2 5.9 12.7
 0 8 -2 5.3 5.7
 0 -8 2 2.4 4.8
 0 -8 2 4.4 4.1
 -1 8 -2 239.88 43.9
 -1 8 -2 255.87 30.8
 1 -8 2 276.77 36.9
 1 -8 2 278.77 29.3
 1 -8 2 295.97 29
 -2 8 -2 255.97 47.3
 2 -8 2 253.17 30.1
 2 -8 2 301.87 30.3
 2 -8 2 326.97 40.5
 -3 8 -2 815.32 106.89
 3 -8 2 906.01 96.79
 3 -8 2 972.7 85.89
 3 -8 2 782.42 85.59
 -4 8 -2 64.39 24.1
 -4 8 -2 54.99 19.5
 -4 8 -2 63.29 30.5
 4 -8 2 52.49 10
 4 -8 2 70.09 11
 4 -8 2 57.59 20.8
 -5 8 -2 472.85 74.79
 -5 8 -2 455.85 78.09
 5 -8 2 559.74 65.99
 5 -8 2 469.55 50.79
 5 -8 2 445.66 50.59
 5 -8 2 562.94 50.79
 -6 8 -2 10.2 34.8
 -6 8 -2 -4.8 36.8
 -6 8 -2 2.2 8.6
 6 -8 2 2.7 6.3
 6 -8 2 5.8 6.3
 6 -8 2 8.5 8
 7 7 -2 227.38 28.1
 -7 -7 2 260.37 26.7
 6 7 -2 763.82 75.49
 -6 -7 2 724.73 75.09
 -6 -7 2 770.02 74.19
 5 7 -2 514.45 47.9
 -5 -7 2 456.05 47.1
 -5 -7 2 534.15 46.5
 -5 -7 2 362.56 53.69
 4 7 -2 550.84 53.59
 -4 -7 2 547.25 52.79
 -4 -7 2 445.96 56.09
 -4 -7 2 579.94 52.29
 3 7 -2 369.06 41.5
 -3 -7 2 429.06 40.6
 -3 -7 2 397.16 41
 2 7 -2 53.19 18.9
 2 7 -2 51.49 9.6
 -2 -7 2 45 9.1
 -2 -7 2 42.9 7.4
 -2 -7 2 51.09 8.2
 1 7 -2 116.19 24
 1 7 -2 73.99 13.2
 -1 -7 2 116.39 14.2
 -1 -7 2 108.99 12.5
 0 7 -2 104.19 24.2
 0 7 -2 98.19 14.3
 0 -7 2 107.19 13.5
 0 -7 2 118.59 13.1
 0 -7 2 103.19 18.3
 -1 7 -2 298.77 44.6
 -1 7 -2 253.47 31.9
 1 -7 2 320.87 31.4
 1 -7 2 292.87 37.8
 1 -7 2 325.07 31.1
 -2 7 -2 202.48 22.6
 -2 7 -2 185.18 24.7
 -2 7 -2 199.48 35.9
 2 -7 2 170.28 20.7
 2 -7 2 183.68 28.4
 2 -7 2 205.48 21
 -3 7 -2 508.35 71.69
 -3 7 -2 524.15 65.79
 -3 7 -2 553.44 59.99
 3 -7 2 589.74 65.09
 3 -7 2 602.74 55.09
 3 -7 2 521.15 54.89
 -4 7 -2 1023.4 124.49
 -4 7 -2 1028.4 103.89
 -4 7 -2 958.7 119.89
 4 -7 2 1163.18 103.89
 4 -7 2 1094.39 103.99
 4 -7 2 1089.09 115.19
 -5 7 -2 122.19 16
 -5 7 -2 150.68 38.5
 -5 7 -2 102.19 39.8
 5 -7 2 123.49 15.2
 5 -7 2 132.39 27.6
 5 -7 2 107.19 15.3
 5 -7 2 125.89 15.8
 -6 7 -2 621.04 97.29
 -6 7 -2 627.14 67.09
 6 -7 2 644.54 66.79
 6 -7 2 749.92 84.19
 6 -7 2 742.63 66.69
 6 -7 2 594.34 70.19
 -7 7 -2 2.8 28.7
 -7 7 -2 4.3 39.6
 -7 7 -2 13.5 9.5
 7 -7 2 9.1 8
 7 -7 2 4.1 6
 7 -7 2 14.4 6.5
 7 -7 2 6.5 18
 7 6 -2 525.85 55.29
 -7 -6 2 530.75 54.39
 -7 -6 2 595.94 56.19
 6 6 -2 41.2 8.1
 -6 -6 2 27.4 17.8
 -6 -6 2 55.39 9.1
 -6 -6 2 56.39 8
 5 6 -2 2123.79 213.08
 -5 -6 2 2177.68 212.28
 -5 -6 2 2338.17 213.28
 4 6 -2 349.47 35.9
 -4 -6 2 372.86 35.1
 -4 -6 2 275.07 42.4
 -4 -6 2 392.56 35.9
 3 6 -2 741.13 69.09
 -3 -6 2 613.74 67.99
 -3 -6 2 619.34 64.59
 -3 -6 2 707.13 65.39
 2 6 -2 140.39 23.7
 2 6 -2 120.09 15.3
 -2 -6 2 136.69 14.5
 -2 -6 2 118.79 14.6
 1 6 -2 0.4 6.6
 1 6 -2 1.2 3.5
 -1 -6 2 7.1 4
 -1 -6 2 4.1 2.7
 -1 -6 2 2.7 4.3
 0 6 -2 47.9 8.3
 0 6 -2 26.4 12.3
 0 -6 2 29.4 9.5
 0 -6 2 35.7 6.4
 0 -6 2 30.8 5.6
 -1 6 -2 263.17 36.9
 -1 6 -2 206.38 25.6
 1 -6 2 271.87 25.1
 1 -6 2 219.68 30.4
 1 -6 2 242.08 25
 -2 6 -2 829.62 97.99
 -2 6 -2 891.91 88.19
 -2 6 -2 836.92 86.19
 -2 6 -2 830.92 92.09
 2 -6 2 882.41 92.79
 2 -6 2 960.9 85.49
 2 -6 2 882.21 85.29
 -3 6 -2 99.59 25.1
 -3 6 -2 87.49 25.2
 -3 6 -2 104.99 12.8
 3 -6 2 112.79 12.6
 3 -6 2 98.69 23
 3 -6 2 113.79 12.6
 -4 6 -2 924.71 111.39
 -4 6 -2 1023.3 94.39
 -4 6 -2 1021 113.89
 4 -6 2 849.91 93.99
 4 -6 2 1017.3 104.49
 4 -6 2 861.41 93.89
 4 -6 2 1081.09 94.09
 -5 6 -2 644.74 58.19
 -5 6 -2 488.35 74.89
 -5 6 -2 604.84 82.69
 5 -6 2 538.85 57.59
 5 -6 2 655.13 70.49
 5 -6 2 484.75 57.39
 5 -6 2 645.14 57.59
 -6 6 -2 528.75 82.09
 -6 6 -2 525.95 56.29
 -6 6 -2 462.35 73.49
 6 -6 2 422.26 51.79
 6 -6 2 581.94 51.89
 6 -6 2 522.25 52.49
 6 -6 2 576.14 66.59
 -7 6 -2 677.03 107.39
 -7 6 -2 586.74 92.39
 -7 6 -2 700.83 68.09
 7 -6 2 596.94 69.59
 7 -6 2 630.94 67.49
 7 -6 2 789.62 67.19
 -8 6 -2 48.8 34
 -8 6 -2 102.29 17.7
 -8 6 -2 77.59 52.49
 8 -6 2 103.29 13.9
 8 -6 2 155.68 36.6
 8 -6 2 81.79 16.7
 8 -6 2 78.79 16.2
 8 5 -2 170.28 18.3
 8 5 -2 156.78 24.3
 -8 -5 2 169.38 20.2
 -8 -5 2 144.39 19
 -8 -5 2 88.49 38.4
 7 5 -2 150.58 17.6
 7 5 -2 156.38 21.8
 -7 -5 2 159.18 18.4
 -7 -5 2 124.29 41.7
 -7 -5 2 146.09 16.5
 6 5 -2 1107.09 114.89
 -6 -5 2 1148.39 113.69
 -6 -5 2 1190.78 112.69
 5 5 -2 58.49 8.7
 -5 -5 2 60.79 7.9
 -5 -5 2 40.4 19.3
 -5 -5 2 69.09 9
 4 5 -2 1824.12 180.68
 -4 -5 2 1885.31 180.18
 -4 -5 2 1935.51 183.38
 3 5 -2 122.79 14.2
 -3 -5 2 151.68 13.9
 -3 -5 2 114.99 20.9
 -3 -5 2 105.89 13.7
 2 5 -2 1312.77 139.99
 2 5 -2 1648.64 147.69
 -2 -5 2 1508.15 139.59
 -2 -5 2 1388.06 141.69
 -2 -5 2 1415.06 139.89
 1 5 -2 69.99 15.4
 1 5 -2 71.69 10.1
 -1 -5 2 77.69 9.6
 -1 -5 2 103.49 13.7
 0 5 -2 41.4 12.3
 0 5 -2 47 6.8
 0 -5 2 48.7 6
 0 -5 2 32.6 9.2
 0 -5 2 43.4 6.6
 -1 5 -2 75.49 11.5
 -1 5 -2 55.69 15
 -1 5 -2 74.79 9.4
 -1 5 -2 73.59 9.5
 1 -5 2 75.79 8.9
 1 -5 2 72.99 8.8
 1 -5 2 69.79 13.4
 -2 5 -2 288.27 41.1
 2 -5 2 308.97 31.2
 2 -5 2 311.47 37.6
 2 -5 2 325.27 31.3
 -3 5 -2 1596.04 152.78
 -3 5 -2 1511.45 165.18
 3 -5 2 1685.93 152.58
 3 -5 2 1528.55 152.38
 3 -5 2 1599.14 160.58
 -4 5 -2 3.4 9.1
 -4 5 -2 5.6 3
 4 -5 2 2.5 2.7
 4 -5 2 14 3.8
 4 -5 2 2.5 6.2
 4 -5 2 5.6 2.6
 -5 5 -2 2273.17 217.68
 -5 5 -2 1924.11 232.88
 5 -5 2 2550.14 217.48
 5 -5 2 2517.55 229.28
 5 -5 2 2137.09 217.48
 5 -5 2 2163.18 217.58
 -6 5 -2 392.76 37.7
 -6 5 -2 323.77 78.49
 -6 5 -2 311.47 54.09
 6 -5 2 372.76 36.6
 6 -5 2 437.86 50.59
 6 -5 2 317.47 37
 6 -5 2 341.07 37.1
 -7 5 -2 526.45 88.19
 -7 5 -2 422.26 72.59
 -7 5 -2 567.34 53.29
 7 -5 2 473.95 52.69
 7 -5 2 480.15 52.69
 7 -5 2 650.23 68.99
 -8 5 -2 104.99 50.69
 -8 5 -2 106.99 39.3
 -8 5 -2 103.89 18.2
 8 -5 2 151.48 15.8
 8 -5 2 94.69 16.3
 8 -5 2 126.09 31.7
 9 4 -2 17.3 6.2
 8 4 -2 336.37 36
 8 4 -2 386.16 40.5
 -8 -4 2 289.07 66.79
 7 4 -2 108.09 17.7
 7 4 -2 137.59 14.7
 -7 -4 2 98.89 39.8
 -7 -4 2 126.79 15.5
 6 4 -2 634.94 71.49
 6 4 -2 708.93 69.29
 -6 -4 2 586.54 88.39
 -6 -4 2 793.62 70.39
 -6 -4 2 760.02 68.99
 5 4 -2 1185.68 120.09
 -5 -4 2 1300.17 119.79
 4 4 -2 254.67 27.8
 -4 -4 2 216.58 39.3
 -4 -4 2 318.37 28.4
 -4 -4 2 287.47 27.5
 3 4 -2 2652.53 244.08
 -3 -4 2 2149.28 252.97
 -3 -4 2 2683.83 243.68
 -3 -4 2 2698.03 244.18
 2 4 -2 62.09 7.7
 2 4 -2 81.69 13
 -2 -4 2 54.09 7.2
 -2 -4 2 56.39 8.7
 -2 -4 2 61.19 13.1
 1 4 -2 1198.58 120.39
 1 4 -2 1335.07 126.19
 -1 -4 2 1299.47 119.99
 -1 -4 2 1171.58 122.49
 0 4 -2 23.8 4.2
 0 4 -2 11.4 6.4
 0 -4 2 23.2 6.7
 0 -4 2 25.2 3.7
 0 -4 2 19.4 4.1
 -1 4 -2 18.4 3.9
 -1 4 -2 12 6.9
 -1 4 -2 21.4 7.3
 1 -4 2 13.4 3.2
 1 -4 2 10.7 2.9
 1 -4 2 12.6 6.1
 -2 4 -2 584.84 56.79
 -2 4 -2 542.35 64.99
 2 -4 2 603.44 56.69
 2 -4 2 549.65 56.39
 2 -4 2 622.94 63.09
 -3 4 -2 904.61 87.59
 -3 4 -2 808.82 97.09
 3 -4 2 959.4 87.59
 3 -4 2 982.9 95.29
 3 -4 2 858.81 87.39
 -4 4 -2 2526.35 236.68
 -4 4 -2 2246.88 248.48
 4 -4 2 2212.38 236.58
 4 -4 2 2373.56 236.58
 4 -4 2 2702.93 245.88
 4 -4 2 2764.02 236.68
 -5 4 -2 529.15 49.9
 -5 4 -2 474.75 63.39
 5 -4 2 576.34 60.09
 5 -4 2 436.76 49.5
 5 -4 2 525.25 49.4
 5 -4 2 464.95 49.6
 -6 4 -2 1486.05 181.18
 -6 4 -2 1604.14 193.08
 -6 4 -2 1800.12 166.38
 6 -4 2 1579.94 165.98
 6 -4 2 1614.64 165.98
 6 -4 2 2042.8 178.78
 6 -4 2 1875.21 165.58
 -7 4 -2 5.2 26.1
 -7 4 -2 1.6 13.3
 -7 4 -2 4.6 6.8
 7 -4 2 1.7 4
 7 -4 2 3.9 8.8
 7 -4 2 -0.6 9.5
 7 -4 2 2.5 3.7
 -8 4 -2 283.67 71.89
 -8 4 -2 240.18 52.99
 -8 4 -2 327.77 33.8
 8 -4 2 226.88 32.2
 8 -4 2 366.96 47.3
 8 -4 2 341.67 31.8
 -9 4 -2 5.7 9.3
 -9 4 -2 9.9 24.8
 -9 4 -2 3.8 46.2
 9 -4 2 11.2 8
 9 -4 2 10.6 17.4
 9 -4 2 12.1 6.6
 9 3 -2 38.6 6.8
 9 3 -2 40.7 12.6
 -9 -3 2 10.9 7.9
 -9 -3 2 32.3 8.2
 -9 -3 2 28.6 40.9
 8 3 -2 14.3 8.6
 8 3 -2 8.1 3.8
 -8 -3 2 5.8 29.5
 -8 -3 2 11.1 5.5
 -8 -3 2 4.3 5.8
 7 3 -2 757.02 80.19
 7 3 -2 760.02 77.09
 -7 -3 2 943.11 78.79
 -7 -3 2 819.82 78.59
 -7 -3 2 641.54 101.29
 6 3 -2 135.79 18.2
 6 3 -2 159.28 15.9
 -6 -3 2 147.99 15.5
 -6 -3 2 108.69 33.3
 -6 -3 2 158.28 17.1
 5 3 -2 1212.18 123.59
 5 3 -2 1378.26 121.89
 -5 -3 2 1045.7 138.39
 -5 -3 2 1346.47 122.69
 -5 -3 2 1287.67 121.59
 4 3 -2 1380.86 134.79
 4 3 -2 1291.77 135.99
 -4 -3 2 1428.66 134.59
 -4 -3 2 1239.88 148.59
 -4 -3 2 1650.83 135.69
 3 3 -2 522.65 50.29
 3 3 -2 492.85 49.3
 -3 -3 2 444.16 59.09
 -3 -3 2 548.45 49.7
 -3 -3 2 506.05 49.1
 2 3 -2 2861.21 270.27
 -2 -3 2 2906.31 270.87
 -2 -3 2 2776.92 270.37
 -2 -3 2 2607.24 277.17
 -2 -3 2 2993.2 270.17
 1 3 -2 412.16 42
 1 3 -2 366.56 37.7
 -1 -3 2 388.96 37.5
 -1 -3 2 371.06 39.4
 0 3 -2 83.59 13.2
 0 3 -2 74.09 8.7
 0 -3 2 77.59 8.5
 0 -3 2 77.99 11.4
 -1 3 -2 87.89 14.6
 1 -3 2 87.49 9.2
 1 -3 2 84.69 9.4
 1 -3 2 86.39 13
 -2 3 -2 691.83 81.39
 -2 3 -2 843.32 74.79
 2 -3 2 777.02 74.79
 2 -3 2 787.12 80.19
 2 -3 2 761.72 74.99
 -3 3 -2 436.56 41.7
 -3 3 -2 448.26 50.89
 3 -3 2 441.86 48.2
 3 -3 2 378.56 41.6
 3 -3 2 433.86 41.8
 3 -3 2 421.16 41.7
 -4 3 -2 3756.12 348.07
 -4 3 -2 3374.16 358.26
 4 -3 2 4094.69 348.07
 4 -3 2 3191.38 347.87
 4 -3 2 3399.06 347.87
 4 -3 2 4070.19 356.46
 -5 3 -2 1327.07 117.19
 -5 3 -2 1003.8 127.39
 5 -3 2 1360.76 126.19
 5 -3 2 1087.09 116.69
 5 -3 2 1255.17 116.59
 -6 3 -2 1273.37 111.99
 -6 3 -2 1059.09 125.09
 6 -3 2 1317.07 121.99
 6 -3 2 955.7 110.99
 6 -3 2 1305.57 111.09
 6 -3 2 988.3 111.09
 -7 3 -2 770.02 74.69
 -7 3 -2 724.83 106.59
 -7 3 -2 580.74 87.29
 7 -3 2 867.21 73.79
 7 -3 2 916.01 86.49
 7 -3 2 623.04 73.89
 -8 3 -2 22.2 34.3
 -8 3 -2 21.4 18.6
 -8 3 -2 27.4 8.8
 8 -3 2 37.6 7
 8 -3 2 24.7 7.5
 8 -3 2 28.7 15.1
 -9 3 -2 108.99 41.2
 -9 3 -2 92.99 60.89
 -9 3 -2 164.38 20.2
 9 -3 2 167.08 32.7
 9 -3 2 98.39 17.9
 9 2 -2 -0.9 8
 9 2 -2 7.6 4.1
 -9 -2 2 12.6 6.5
 -9 -2 2 8 34
 -9 -2 2 17.2 8.1
 8 2 -2 147.49 16.2
 8 2 -2 156.48 20.4
 -8 -2 2 145.99 18.8
 -8 -2 2 91.29 40.1
 -8 -2 2 180.98 18.3
 7 2 -2 5.7 2.7
 7 2 -2 2.6 4.1
 -7 -2 2 9.4 4.7
 -7 -2 2 -5.5 18.5
 -7 -2 2 0.7 3
 6 2 -2 1610.14 170.68
 6 2 -2 1732.43 168.48
 -6 -2 2 1851.11 169.68
 -6 -2 2 1840.32 169.88
 5 2 -2 18.4 3.3
 5 2 -2 12.5 4.3
 -5 -2 2 10.2 3.5
 -5 -2 2 14.8 2.8
 4 2 -2 3092.79 324.57
 4 2 -2 3427.56 323.37
 -4 -2 2 3574.24 324.17
 -4 -2 2 3464.45 323.17
 3 2 -2 367.26 39.5
 3 2 -2 419.56 40.6
 -3 -2 2 425.66 39.5
 -3 -2 2 418.56 40.1
 2 2 -2 1650.13 175.98
 -2 -2 2 1978.9 175.98
 -2 -2 2 1886.21 175.58
 1 2 -2 244.48 27.3
 1 2 -2 238.98 24.3
 -1 -2 2 281.77 25.9
 -1 -2 2 238.08 24.3
 -1 -2 2 226.18 24.1
 0 2 -2 336.37 34.8
 0 2 -2 354.96 38.5
 0 -2 2 382.46 37.6
 -1 2 -2 14.9 5.7
 -1 2 -2 15.7 6.7
 -1 2 -2 22.3 2.5
 1 -2 2 13.4 2.1
 1 -2 2 14.4 2.4
 1 -2 2 14.6 4.9
 -2 2 -2 230.88 20.5
 -2 2 -2 181.88 25.6
 2 -2 2 220.78 25.3
 2 -2 2 188.58 20.3
 -3 2 -2 2867.91 276.77
 3 -2 2 2980.8 274.97
 3 -2 2 2821.42 268.87
 3 -2 2 2612.84 268.87
 -4 2 -2 57.09 6.7
 -4 2 -2 37.3 11.7
 4 -2 2 35.1 5.7
 4 -2 2 48 6.3
 4 -2 2 45.9 11.1
 -5 2 -2 2465.45 203.98
 -5 2 -2 1881.11 212.98
 -5 2 -2 2236.58 203.78
 5 -2 2 2436.46 211.88
 5 -2 2 1875.31 203.18
 5 -2 2 1854.01 203.18
 -6 2 -2 759.72 61.89
 -6 2 -2 561.04 72.29
 -6 2 -2 566.34 84.99
 -6 2 -2 656.33 61.69
 6 -2 2 536.25 60.99
 -7 2 -2 855.11 124.49
 -7 2 -2 1011.2 96.69
 -7 2 -2 1078.79 96.69
 7 -2 2 1142.09 106.19
 7 -2 2 793.72 95.89
 -8 2 -2 467.95 43.5
 -8 2 -2 327.27 55.99
 -8 2 -2 433.16 43
 -8 2 -2 344.37 74.59
 8 -2 2 365.86 42.8
 8 -2 2 485.15 53.39
 -9 2 -2 79.79 15.1
 -9 2 -2 78.19 30
 -9 2 -2 54.69 44
 -9 2 -2 93.29 15.8
 9 -2 2 77.69 10.7
 9 -2 2 128.89 25.5
 9 -2 2 90.69 24.2
 9 1 -2 5.7 3.5
 9 1 -2 0.5 7.7
 -9 -1 2 -2.4 29.2
 -9 -1 2 -5 6.2
 -9 -1 2 -0.3 9.5
 8 1 -2 2.8 2.7
 8 1 -2 2.1 6.2
 -8 -1 2 1.5 7.7
 -8 -1 2 -0.5 25.2
 -8 -1 2 6.6 5.2
 -8 -1 2 6.2 4.1
 7 1 -2 327.87 38.2
 7 1 -2 361.16 35.5
 -7 -1 2 421.26 37.4
 -7 -1 2 389.96 37.7
 -7 -1 2 319.47 41.3
 6 1 -2 801.12 87.79
 6 1 -2 911.51 85.69
 -6 -1 2 991.3 87.49
 -6 -1 2 888.61 94.49
 -6 -1 2 859.81 86.89
 5 1 -2 3536.95 330.87
 5 1 -2 3442.26 332.77
 -5 -1 2 3751.32 332.27
 -5 -1 2 3684.83 332.07
 -5 -1 2 2982.4 334.17
 4 1 -2 675.93 70.79
 4 1 -2 751.22 69.49
 -4 -1 2 782.32 70.49
 -4 -1 2 748.43 72.09
 -4 -1 2 649.93 70.19
 3 1 -2 4472.35 487.15
 3 1 -2 5648.83 486.45
 -3 -1 2 4969.3 487.05
 -3 -1 2 5554.54 487.55
 -3 -1 2 4896.41 486.25
 2 1 -2 116.79 13.8
 2 1 -2 144.59 13.3
 -2 -1 2 125.59 13.7
 -2 -1 2 144.19 13.3
 1 1 -2 2285.37 196.38
 1 1 -2 2054.39 196.58
 -1 -1 2 2141.79 197.88
 -1 -1 2 1878.91 196.48
 -1 -1 2 1951.9 196.28
 0 1 -2 5.1 1.4
 0 1 -2 7.8 1.2
 0 1 -2 7.2 3.3
 0 -1 2 3.1 1
 0 -1 2 5.2 2.5
 0 -1 2 5.1 1.6
 -1 1 -2 16.8 5.8
 -1 1 -2 11.8 1.6
 -1 1 -2 8.6 3.7
 1 -1 2 15.6 1.6
 1 -1 2 10.7 4.4
 -2 1 -2 131.99 13.2
 -2 1 -2 124.49 13.2
 -2 1 -2 118.59 17.4
 2 -1 2 159.08 18
 2 -1 2 141.19 13.3
 2 -1 2 117.79 13.1
 -3 1 -2 997.4 106.49
 -3 1 -2 1105.99 100.69
 -3 1 -2 1028.4 100.59
 3 -1 2 980 100.59
 3 -1 2 1215.98 106.39
 3 -1 2 962.8 100.89
 -4 1 -2 1332.77 113.59
 -4 1 -2 1172.98 113.39
 -4 1 -2 1214.58 121.19
 4 -1 2 1000.8 113.19
 -5 1 -2 11 7.8
 -5 1 -2 15.8 4.1
 -5 1 -2 17.4 4.2
 5 -1 2 23.5 8.4
 5 -1 2 22.4 4.9
 -6 1 -2 2120.29 238.58
 -6 1 -2 2069.69 223.38
 -6 1 -2 2587.44 213.78
 6 -1 2 2084.59 213.48
 -7 1 -2 101.29 13.5
 -7 1 -2 90.79 36.6
 -7 1 -2 114.19 13.5
 -7 1 -2 88.89 22.9
 7 -1 2 110.69 11.8
 7 -1 2 94.49 13.6
 7 -1 2 114.79 19.6
 -8 1 -2 1459.65 135.09
 -8 1 -2 1109.89 145.99
 -8 1 -2 1486.65 135.09
 8 -1 2 1373.86 132.99
 8 -1 2 1589.04 143.29
 8 -1 2 1263.27 135.39
 -9 1 -2 102.99 49.99
 -9 1 -2 116.39 16
 -9 1 -2 124.89 17.5
 -9 1 -2 104.59 29.8
 9 -1 2 135.19 27.5
 9 -1 2 111.39 17.5
 9 -1 2 121.49 13.7
 -10 1 -2 135.69 21.7
 -10 1 -2 113.09 38.8
 10 -1 2 164.78 17.3
 9 0 -2 23.5 9.7
 9 0 -2 9.4 3.4
 -9 0 2 10.4 33.8
 -9 0 2 7.6 5.5
 -9 0 2 10.5 6.4
 -9 0 2 7.5 13.4
 8 0 -2 20.8 7.2
 8 0 -2 28.3 4.7
 -8 0 2 24 13
 -8 0 2 29.6 7.1
 -8 0 2 38.2 7.5
 7 0 -2 194.48 24.9
 7 0 -2 228.18 22.4
 -7 0 2 247.78 24.4
 -7 0 2 227.48 24.6
 -7 0 2 220.58 31.6
 6 0 -2 417.36 41.4
 6 0 -2 399.86 43.6
 -6 0 2 413.16 48.7
 -6 0 2 473.25 43.1
 -6 0 2 438.26 43.3
 5 0 -2 2158.08 230.88
 5 0 -2 2368.86 229.28
 -5 0 2 2392.56 230.48
 -5 0 2 2703.73 235.88
 4 0 -2 2871.71 317.77
 4 0 -2 3552.54 316.47
 -4 0 2 3370.96 317.57
 -4 0 2 3563.64 320.97
 -4 0 2 3248.88 317.67
 3 0 -2 1114.19 110.29
 3 0 -2 1237.08 109.19
 -3 0 2 1181.98 112.09
 -3 0 2 1100.69 110.19
 -3 0 2 1079.09 109.99
 2 0 -2 3047.79 302.17
 2 0 -2 2901.61 302.27
 2 0 -2 3312.37 301.47
 -2 0 2 2959.1 302.17
 -2 0 2 3555.34 303.57
 -2 0 2 3232.98 302.07
 1 0 -2 165.38 18.7
 1 0 -2 186.68 18.6
 -1 0 2 211.08 18.6
 -1 0 2 159.58 18.6
 -1 0 2 218.28 18.2
 0 0 -2 1139.79 108.69
 -1 0 -2 23.4 6.3
 -1 0 -2 16.2 4.5
 -1 0 -2 19.9 2.2
 1 0 2 25.1 5.4
 1 0 2 15.3 2.1
 1 0 2 30.3 7.8
 -2 0 -2 1018.7 104.19
 -2 0 -2 1001.3 98.99
 2 0 2 956.9 94.89
 -3 0 -2 13.2 6.1
 -3 0 -2 15.9 3.3
 -3 0 -2 17.1 11.2
 -3 0 -2 16.2 2.8
 3 0 2 11.9 2.9
 3 0 2 16.8 5.6
 -4 0 -2 1133.79 103.69
 -4 0 -2 1042 109.59
 -4 0 -2 1126.39 103.69
 -4 0 -2 1070.99 120.19
 4 0 2 995.9 103.79
 -5 0 -2 1558.44 144.69
 -5 0 -2 1260.67 162.08
 -5 0 -2 1368.66 151.28
 -5 0 -2 1724.63 144.89
 5 0 2 1523.85 143.69
 5 0 2 1721.23 149.88
 5 0 2 1293.07 144.79
 -6 0 -2 466.55 44.4
 -6 0 -2 383.56 51.49
 -6 0 -2 375.86 64.29
 6 0 2 391.06 44.6
 6 0 2 444.36 43.1
 6 0 2 535.65 49.9
 -7 0 -2 1450.35 195.88
 -7 0 -2 1975.7 171.28
 -7 0 -2 1902.91 171.18
 7 0 2 1713.83 169.48
 7 0 2 1739.03 171.78
 -8 0 -2 47.2 9.2
 -8 0 -2 47.2 17
 -8 0 -2 48 34.9
 -8 0 -2 66.39 10.4
 8 0 2 52.69 11.1
 8 0 2 66.49 15.4
 8 0 2 62.29 8
 -9 0 -2 501.65 104.49
 -9 0 -2 766.02 71.19
 -9 0 -2 781.82 70.89
 9 0 2 625.04 71.69
 9 0 2 730.43 68.69
 -10 0 -2 6.1 9.2
 -10 0 -2 -19 61.39
 -10 0 -2 14.7 17.9
 10 0 2 8.7 5.3
 10 0 2 2.7 12.9
 9 -1 -2 30.7 5.1
 9 -1 -2 24.9 9.4
 -9 1 2 27.9 9.3
 -9 1 2 18.1 16.8
 -9 1 2 12.1 55.19
 -9 1 2 23.3 7.2
 8 -1 -2 67.39 8
 8 -1 -2 64.99 11.7
 -8 1 2 70.69 11.9
 -8 1 2 59.99 20.9
 -8 1 2 86.39 11
 7 -1 -2 1.1 4.1
 7 -1 -2 7.3 2.1
 -7 1 2 11.8 5.4
 -7 1 2 8.9 4.2
 -7 1 2 3.7 7.8
 6 -1 -2 1122.49 107.49
 6 -1 -2 1019.3 109.39
 -6 1 2 1133.19 116.99
 -6 1 2 1205.28 109.29
 -6 1 2 1138.39 109.49
 5 -1 -2 91.59 13.9
 5 -1 -2 78.49 10.6
 5 -1 -2 91.89 9.1
 -5 1 2 94.19 11
 -5 1 2 79.89 10.3
 -5 1 2 87.09 15.7
 4 -1 -2 2428.86 230.08
 4 -1 -2 2155.88 227.08
 4 -1 -2 2308.27 226.88
 -4 1 2 2483.85 226.88
 -4 1 2 2523.05 231.88
 -4 1 2 2317.57 226.98
 3 -1 -2 1427.46 142.89
 3 -1 -2 1282.47 142.39
 -3 1 2 1513.25 142.89
 -3 1 2 1587.24 146.39
 -3 1 2 1633.34 142.59
 2 -1 -2 3127.09 327.77
 2 -1 -2 3914.71 330.37
 2 -1 -2 3473.45 327.57
 -2 1 2 3309.97 327.47
 -2 1 2 3385.76 327.87
 -2 1 2 3425.06 330.27
 1 -1 -2 1986.4 186.38
 1 -1 -2 1895.61 186.58
 1 -1 -2 1871.51 186.88
 -1 1 2 2031.4 186.48
 -1 1 2 1955 186.88
 -1 1 2 2016.4 188.78
 0 -1 -2 459.25 45.7
 0 -1 -2 464.15 47.5
 0 -1 -2 507.35 45.5
 0 1 2 451.85 47.4
 0 1 2 496.55 45.7
 0 1 2 473.85 45.5
 -1 -1 -2 348.07 36.8
 -1 -1 -2 323.67 31.8
 -1 -1 -2 325.87 31.8
 1 1 2 326.47 31.9
 -2 -1 -2 245.88 22.3
 -2 -1 -2 234.48 21.9
 -2 -1 -2 230.28 30.9
 2 1 2 210.98 21.8
 2 1 2 200.88 22.2
 -3 -1 -2 478.05 56.99
 -3 -1 -2 585.34 54.49
 -3 -1 -2 565.54 66.79
 3 1 2 517.15 54.49
 3 1 2 648.84 53.99
 -4 -1 -2 392.76 46.5
 -4 -1 -2 392.46 57.19
 4 1 2 463.15 42.3
 4 1 2 475.55 43.5
 -5 -1 -2 2122.79 188.88
 -5 -1 -2 1626.04 205.78
 -5 -1 -2 2198.18 188.88
 5 1 2 1969.1 187.88
 5 1 2 1850.01 189.28
 -6 -1 -2 781.12 114.49
 -6 -1 -2 1046.8 95.29
 -6 -1 -2 1035.4 95.19
 6 1 2 956.4 93.99
 6 1 2 1011.2 96.09
 -7 -1 -2 477.15 82.29
 -7 -1 -2 636.04 59.49
 7 1 2 562.24 60.39
 7 1 2 642.44 58.19
 -8 -1 -2 341.67 73.19
 -8 -1 -2 481.85 46.9
 -8 -1 -2 498.05 47.3
 8 1 2 432.86 48.1
 8 1 2 469.65 45.2
 -9 -1 -2 34.3 36.1
 -9 -1 -2 91.19 12.2
 -9 -1 -2 60.49 19.4
 -9 -1 -2 66.69 12.6
 9 1 2 74.79 9.7
 9 1 2 46.8 11.8
 -10 -1 -2 129.39 88.09
 -10 -1 -2 198.98 23.2
 10 1 2 154.68 18.9
 9 -2 -2 2.4 7.9
 9 -2 -2 8.5 4.2
 9 -2 -2 10.8 3.2
 -9 2 2 6.3 7.9
 -9 2 2 16.8 7.4
 -9 2 2 6.8 16.5
 8 -2 -2 64.49 7.8
 8 -2 -2 39.8 10.2
 8 -2 -2 90.69 9
 -8 2 2 61.39 10.7
 -8 2 2 79.09 33.7
 -8 2 2 68.89 11.8
 7 -2 -2 195.98 26.1
 7 -2 -2 249.18 24.2
 7 -2 -2 288.27 24.9
 -7 2 2 228.98 26
 -7 2 2 232.88 26.7
 -7 2 2 248.58 37.1
 6 -2 -2 363.36 30.3
 6 -2 -2 281.47 31.4
 6 -2 -2 278.77 31.9
 -6 2 2 258.17 39.1
 -6 2 2 307.67 31.9
 5 -2 -2 1587.44 147.79
 5 -2 -2 1345.57 148.19
 5 -2 -2 1361.16 148.59
 5 -2 -2 1729.23 154.18
 -5 2 2 1510.45 155.98
 -5 2 2 1645.04 148.49
 -5 2 2 1597.54 148.89
 4 -2 -2 108.89 15.3
 4 -2 -2 90.49 10.8
 4 -2 -2 88.79 11.3
 -4 2 2 104.29 11.6
 -4 2 2 106.39 11.1
 -4 2 2 83.29 15.5
 3 -2 -2 4916.51 480.95
 3 -2 -2 5294.87 480.15
 3 -2 -2 4467.15 480.55
 3 -2 -2 5142.79 484.75
 -3 2 2 5373.56 481.15
 -3 2 2 5090.09 485.95
 2 -2 -2 420.06 39.1
 2 -2 -2 409.46 39.7
 2 -2 -2 386.26 39.3
 2 -2 -2 391.16 42.5
 -2 2 2 403.96 39.7
 -2 2 2 415.96 43.5
 -2 2 2 407.26 39.2
 1 -2 -2 2156.88 189.58
 1 -2 -2 1939.71 189.88
 -1 2 2 1865.21 189.58
 -1 2 2 1993.9 189.88
 0 -2 -2 1388.86 134.59
 0 -2 -2 1348.77 134.89
 0 -2 -2 1323.17 136.79
 0 2 2 1502.85 137.19
 0 2 2 1423.66 134.69
 0 2 2 1442.56 134.99
 0 2 2 1447.46 137.19
 -1 -2 -2 789.42 73.89
 -1 -2 -2 709.73 69.09
 -1 -2 -2 684.33 69.19
 1 2 2 704.13 69.19
 -2 -2 -2 1498.55 136.59
 -2 -2 -2 1366.16 126.19
 -2 -2 -2 1239.68 126.19
 2 2 2 1194.08 126.19
 2 2 2 1314.77 125.89
 -3 -2 -2 176.88 17.7
 -3 -2 -2 158.18 28.7
 -3 -2 -2 176.18 18.2
 3 2 2 172.08 17.7
 3 2 2 188.38 18.5
 -4 -2 -2 885.01 108.29
 4 2 2 1051.59 92.99
 4 2 2 933.21 93.99
 -5 -2 -2 57.09 7.4
 -5 -2 -2 38.1 20.9
 5 2 2 34.9 7.4
 5 2 2 57.19 8.3
 5 2 2 51.49 6.4
 6 2 2 2742.53 269.27
 6 2 2 2891.51 270.97
 -7 -2 -2 100.59 12.7
 -7 -2 -2 64.89 31.7
 -7 -2 -2 93.79 12.1
 7 2 2 100.79 11.3
 7 2 2 101.89 13
 7 2 2 79.49 13.5
 -8 -2 -2 737.33 71.79
 -8 -2 -2 825.92 71.69
 8 2 2 648.34 69.79
 8 2 2 670.93 72.89
 -9 -2 -2 79.69 43.6
 -9 -2 -2 157.88 19.6
 -9 -2 -2 155.48 19.7
 9 2 2 193.18 29.5
 9 -3 -2 41.8 10.6
 9 -3 -2 46.4 6.6
 -9 3 2 48.4 10.7
 -9 3 2 12 21.4
 8 -3 -2 32.9 8.9
 8 -3 -2 41.5 6.6
 -8 3 2 39.1 18.9
 -8 3 2 33 8.8
 7 -3 -2 365.16 40.7
 7 -3 -2 345.67 40.9
 7 -3 -2 456.15 39
 -7 3 2 363.86 53.49
 -7 3 2 401.06 41.2
 6 -3 -2 221.08 27.1
 6 -3 -2 232.78 27.5
 6 -3 -2 283.87 25.4
 6 -3 -2 251.67 33.3
 -6 3 2 220.08 36.2
 -6 3 2 280.37 27.6
 5 -3 -2 598.34 62.89
 5 -3 -2 727.93 69.79
 5 -3 -2 655.33 61.49
 5 -3 -2 561.64 62.29
 -5 3 2 579.94 71.29
 -5 3 2 690.13 63.29
 4 -3 -2 1391.46 153.18
 4 -3 -2 1745.63 152.38
 4 -3 -2 1482.15 152.98
 4 -3 -2 1695.53 159.18
 -4 3 2 1713.43 153.58
 -4 3 2 1520.45 160.88
 3 -3 -2 337.37 31.7
 3 -3 -2 327.87 36.8
 3 -3 -2 315.27 32.4
 3 -3 -2 308.27 32
 -3 3 2 316.77 32.4
 -3 3 2 329.77 38.7
 2 -3 -2 3751.42 336.27
 2 -3 -2 3210.38 340.37
 2 -3 -2 3657.23 336.87
 -2 3 2 3426.16 336.37
 -2 3 2 3643.44 336.87
 -2 3 2 3493.15 342.17
 1 -3 -2 218.08 21.4
 1 -3 -2 192.18 21.6
 1 -3 -2 228.78 25.2
 -1 3 2 228.48 21.9
 -1 3 2 230.18 25.9
 -1 3 2 210.78 24.5
 -1 3 2 204.58 21.5
 0 -3 -2 938.61 103.29
 0 -3 -2 1088.89 101.29
 0 -3 -2 1041.2 101.59
 0 3 2 1076.09 104.29
 0 3 2 1036.4 101.39
 0 3 2 1165.68 105.09
 -1 -3 -2 96.79 13.5
 -1 -3 -2 91.49 9.8
 -1 -3 -2 82.89 9.8
 1 3 2 92.19 12
 1 3 2 116.69 16.2
 1 3 2 83.69 9.8
 -2 -3 -2 134.09 14
 -2 -3 -2 131.69 21
 -2 -3 -2 132.19 13.7
 2 3 2 131.39 13.9
 -3 -3 -2 500.35 50.89
 -3 -3 -2 464.25 61.89
 -3 -3 -2 602.54 51.59
 3 3 2 519.95 51.09
 -4 -3 -2 560.64 53.09
 -4 -3 -2 564.24 52.49
 4 3 2 518.85 52.49
 4 3 2 504.15 53.49
 -5 -3 -2 2332.37 218.28
 -5 -3 -2 2576.24 217.48
 5 3 2 2311.87 217.48
 5 3 2 1844.02 218.48
 -6 -3 -2 198.28 44.2
 -6 -3 -2 256.17 30.8
 6 3 2 293.87 26
 6 3 2 218.68 29
 7 3 2 1601.14 159.78
 7 3 2 1660.13 157.18
 -8 -3 -2 4.7 4.8
 -8 -3 -2 10.4 24.2
 -8 -3 -2 1.6 4.8
 8 3 2 2.5 7
 8 3 2 0.9 3.4
 -9 -3 -2 248.08 74.39
 -9 -3 -2 464.85 44
 -9 -3 -2 459.95 43.1
 9 3 2 404.46 41.3
 9 3 2 376.46 45.5
 9 -4 -2 0 7.3
 9 -4 -2 0.6 4.2
 -9 4 2 5.5 23.4
 8 -4 -2 12.3 6.5
 8 -4 -2 6.2 3.7
 -8 4 2 3.2 16.8
 -8 4 2 9 7.5
 7 -4 -2 5.6 6.2
 7 -4 -2 -0.6 2.8
 7 -4 -2 2.4 4.3
 -7 4 2 -1.3 11.9
 -7 4 2 3.3 5.3
 6 -4 -2 323.17 35.9
 6 -4 -2 320.97 35.2
 6 -4 -2 370.66 34.1
 -6 4 2 329.07 48
 -6 4 2 350.26 36.1
 5 -4 -2 308.37 37.4
 5 -4 -2 256.27 29.8
 5 -4 -2 270.27 29.5
 5 -4 -2 292.67 28.6
 -5 4 2 320.27 30.4
 -5 4 2 265.57 39.7
 4 -4 -2 2608.24 227.28
 4 -4 -2 2182.88 228.08
 4 -4 -2 2446.36 234.88
 4 -4 -2 2335.07 227.88
 -4 4 2 2534.85 228.38
 -4 4 2 2142.29 237.18
 3 -4 -2 1372.86 127.89
 3 -4 -2 1379.06 126.99
 3 -4 -2 1121.39 127.19
 3 -4 -2 1401.16 133.79
 -3 4 2 1428.16 127.89
 -3 4 2 1250.77 135.59
 2 -4 -2 1388.66 136.89
 2 -4 -2 1348.77 131.79
 2 -4 -2 1419.16 131.29
 -2 4 2 1406.26 138.99
 -2 4 2 1301.07 131.59
 -2 4 2 1353.86 131.89
 1 -4 -2 2723.73 267.07
 1 -4 -2 2934.61 266.77
 -1 4 2 2777.12 272.77
 -1 4 2 3026.6 267.47
 -1 4 2 2724.23 270.47
 -1 4 2 2594.14 266.97
 0 -4 -2 269.07 26.9
 0 -4 -2 259.67 27.3
 0 4 2 295.07 30.7
 0 4 2 251.57 31
 -1 -4 -2 345.97 37.2
 -1 -4 -2 386.86 40.8
 -1 -4 -2 373.46 38
 1 4 2 410.86 41
 1 4 2 373.86 37.6
 -2 -4 -2 125.99 28
 -2 -4 -2 106.59 12.8
 -2 -4 -2 156.98 13.5
 2 4 2 110.89 14.8
 2 4 2 115.89 13.1
 -3 -4 -2 882.21 83.79
 -3 -4 -2 755.32 93.09
 -3 -4 -2 976.7 84.39
 3 4 2 797.72 84.89
 3 4 2 933.41 84.19
 -4 -4 -2 160.48 32.7
 -4 -4 -2 225.58 22.4
 -4 -4 -2 224.28 21.8
 4 4 2 215.98 22
 4 4 2 213.68 23
 -5 -4 -2 1148.89 99.89
 -5 -4 -2 968.5 98.69
 5 4 2 940.11 100.39
 5 4 2 1033.9 99.09
 -6 -4 -2 1305.77 119.89
 6 4 2 1289.77 120.19
 6 4 2 1108.49 121.99
 -7 -4 -2 186.68 45.5
 -7 -4 -2 282.37 26.5
 7 4 2 217.08 27.8
 -8 -4 -2 1158.78 104.49
 8 4 2 1026.2 103.09
 8 4 2 982.6 106.59
 -9 -4 -2 49.5 11.2
 -9 -4 -2 69.09 12.2
 -9 -4 -2 34.1 50.39
 9 4 2 75.29 17.3
 9 4 2 75.09 11.3
 8 -5 -2 25.3 5.6
 8 -5 -2 38 10.5
 -8 5 2 13.1 9.6
 -8 5 2 6.4 20.2
 7 -5 -2 9.7 5.9
 7 -5 -2 3.8 3.7
 7 -5 -2 -0.8 5.9
 -7 5 2 7.1 14.5
 -7 5 2 6.2 6.6
 6 -5 -2 35.3 7.6
 6 -5 -2 52.29 7
 6 -5 -2 44.7 9.2
 -6 5 2 57.89 10.3
 -6 5 2 23.5 14.5
 5 -5 -2 875.31 94.49
 5 -5 -2 1043.5 93.49
 5 -5 -2 988.4 103.29
 5 -5 -2 864.51 94.09
 -5 5 2 1018.6 94.89
 -5 5 2 1014.7 109.69
 4 -5 -2 69.79 15.2
 4 -5 -2 58.39 8.6
 4 -5 -2 52.89 7.3
 4 -5 -2 52.09 7.9
 -4 5 2 55.99 17
 -4 5 2 57.19 8.7
 3 -5 -2 4358.46 393.86
 3 -5 -2 4487.65 402.06
 3 -5 -2 4120.09 394.46
 -3 5 2 3674.93 394.06
 -3 5 2 3912.11 404.56
 -3 5 2 4215.88 394.66
 2 -5 -2 928.31 94.39
 2 -5 -2 1056.09 100.99
 2 -5 -2 984.3 93.99
 -2 5 2 906.21 94.29
 -2 5 2 938.81 99.29
 -2 5 2 1062.99 94.99
 -2 5 2 941.31 102.79
 1 -5 -2 2002.6 199.28
 1 -5 -2 2275.67 198.98
 -1 5 2 1953.7 199.28
 -1 5 2 2082.89 206.58
 -1 5 2 2068.79 203.18
 0 -5 -2 332.27 35.5
 0 -5 -2 357.96 35.1
 0 5 2 324.87 35.4
 0 5 2 358.36 41
 0 5 2 383.56 39.7
 -1 -5 -2 156.28 17.5
 -1 -5 -2 140.09 19
 -1 -5 -2 156.28 16.5
 1 5 2 137.99 16.9
 1 5 2 210.68 25.9
 1 5 2 163.08 21.1
 -2 -5 -2 1.6 2.1
 -2 -5 -2 3.2 2.3
 -2 -5 -2 2.8 6.2
 2 5 2 1.1 3.3
 2 5 2 2.2 1.9
 2 5 2 21.9 11.6
 -3 -5 -2 186.78 19.2
 -3 -5 -2 163.08 27.2
 -3 -5 -2 178.88 18.7
 3 5 2 182.48 21.8
 3 5 2 170.38 19.1
 -4 -5 -2 644.64 58.69
 -4 -5 -2 512.75 69.19
 -4 -5 -2 657.63 59.39
 4 5 2 564.94 58.89
 -5 -5 -2 5.6 2.9
 -5 -5 -2 10.3 3.2
 -5 -5 -2 3.4 11.2
 5 5 2 2.5 3.1
 -6 -5 -2 670.93 61.59
 -6 -5 -2 716.53 62.89
 6 5 2 491.95 63.19
 6 5 2 603.74 61.79
 -7 -5 -2 478.15 45.2
 7 5 2 426.66 44.1
 7 5 2 390.86 46.9
 -8 -5 -2 532.65 49.3
 8 5 2 449.56 48
 8 5 2 428.06 51.89
 8 -6 -2 2.5 7.3
 8 -6 -2 3 5.6
 8 -6 -2 8.8 10.3
 -8 6 2 2.6 10.4
 -8 6 2 2.9 23.8
 7 -6 -2 5.6 7.4
 7 -6 -2 1.7 5.4
 7 -6 -2 -0.2 3.9
 -7 6 2 -1.7 7.2
 -7 6 2 1.5 19.8
 6 -6 -2 185.78 23.1
 6 -6 -2 194.38 23.6
 6 -6 -2 222.48 22
 -6 6 2 223.78 24.2
 -6 6 2 187.88 40.9
 5 -6 -2 192.38 22.2
 5 -6 -2 183.78 20.6
 5 -6 -2 202.08 21.7
 -5 6 2 181.18 36.3
 -5 6 2 215.98 22.8
 4 -6 -2 1447.96 129.89
 4 -6 -2 1253.27 130.69
 -4 6 2 1404.46 130.99
 -4 6 2 1259.77 144.69
 3 -6 -2 169.18 16.3
 3 -6 -2 136.19 16.7
 -3 6 2 119.39 16.5
 -3 6 2 157.68 23.8
 -3 6 2 162.88 43.1
 -3 6 2 150.68 17.5
 2 -6 -2 2623.64 240.78
 2 -6 -2 2378.46 241.18
 -2 6 2 2164.98 241.18
 -2 6 2 2732.83 241.88
 -2 6 2 2527.95 252.37
 -2 6 2 2659.93 247.08
 1 -6 -2 188.18 18.2
 1 -6 -2 144.79 18.4
 -1 6 2 191.48 27.4
 -1 6 2 158.78 18.7
 -1 6 2 166.88 23.6
 0 -6 -2 1720.53 153.78
 0 -6 -2 1436.06 154.08
 0 6 2 1559.74 161.38
 0 6 2 1447.26 154.18
 0 6 2 1803.42 159.28
 -1 -6 -2 346.47 34.2
 -1 -6 -2 360.96 35.6
 1 6 2 304.37 34.6
 1 6 2 347.47 40.7
 -2 -6 -2 1.7 3.6
 -2 -6 -2 9.7 3.5
 -2 -6 -2 1.6 6.6
 -2 -6 -2 5.3 2.5
 2 6 2 1 2.6
 2 6 2 1.9 4.8
 -3 -6 -2 4.8 7.3
 -3 -6 -2 2.6 2.8
 -3 -6 -2 8.5 3.2
 3 6 2 4.6 3.5
 3 6 2 3.9 5.4
 -4 -6 -2 130.99 26.5
 -4 -6 -2 188.98 18.3
 -4 -6 -2 147.09 17.3
 4 6 2 167.68 18.3
 -5 -6 -2 665.93 69.19
 -5 -6 -2 761.12 70.29
 5 6 2 694.23 69.89
 -6 -6 -2 13.6 15.4
 -6 -6 -2 23.7 6.4
 -6 -6 -2 35.8 6.5
 6 6 2 22.5 5.9
 -7 -6 -2 882.31 80.69
 -7 -6 -2 774.52 76.29
 7 6 2 708.73 76.79
 -8 -6 -2 41.7 28.3
 8 6 2 95.39 13.8
 7 -7 -2 1.8 8.8
 7 -7 -2 -1.3 5.9
 7 -7 -2 11.9 5.7
 -7 7 2 15.1 10.4
 -7 7 2 5.8 23
 6 -7 -2 180.78 19.5
 6 -7 -2 138.39 21.4
 6 -7 -2 183.48 20.9
 -6 7 2 186.48 44.1
 -6 7 2 171.28 22
 5 -7 -2 105.09 13.5
 5 -7 -2 76.79 12.2
 5 -7 -2 101.99 11.6
 -5 7 2 93.79 14
 -5 7 2 44.9 22
 4 -7 -2 753.62 68.89
 4 -7 -2 639.14 69.69
 -4 7 2 720.43 70.29
 -4 7 2 716.33 79.39
 -4 7 2 653.53 86.19
 3 -7 -2 904.91 94.09
 3 -7 -2 1052.99 92.49
 -3 7 2 919.61 107.69
 -3 7 2 1020.1 100.99
 -3 7 2 807.42 92.69
 2 -7 -2 495.35 48
 2 -7 -2 466.35 47.4
 -2 7 2 472.75 60.09
 -2 7 2 430.06 48.1
 -2 7 2 473.25 52.89
 1 -7 -2 1355.96 138.09
 1 -7 -2 1565.44 137.99
 -1 7 2 1272.17 138.29
 -1 7 2 1595.24 143.99
 -1 7 2 1305.17 148.29
 0 -7 -2 30.5 7
 0 -7 -2 32.6 6.4
 0 7 2 40.5 7.7
 0 7 2 22.7 11.6
 0 7 2 40.4 12.3
 -1 -7 -2 531.05 50.39
 1 7 2 429.76 50.99
 1 7 2 456.85 57.79
 1 7 2 591.44 57.39
 -2 -7 -2 4.5 3.5
 -2 -7 -2 2.8 4.7
 -2 -7 -2 4.1 3.1
 -2 -7 -2 6.4 5.4
 2 7 2 1.5 6.7
 2 7 2 2.9 3.8
 -3 -7 -2 156.08 15.1
 -3 -7 -2 114.69 15.1
 -3 -7 -2 110.59 19.3
 3 7 2 133.69 21.5
 3 7 2 127.59 15.7
 -4 -7 -2 136.89 17.2
 -4 -7 -2 142.49 16.7
 -4 -7 -2 125.49 24.6
 4 7 2 149.79 18.2
 4 7 2 183.48 24.2
 -5 -7 -2 169.88 32.3
 -5 -7 -2 223.28 22.7
 -5 -7 -2 224.08 23.4
 5 7 2 206.98 23.7
 -6 -7 -2 773.42 73.39
 -6 -7 -2 768.02 74.99
 6 7 2 682.53 74.09
 -7 -7 -2 107.79 14.7
 -7 -7 -2 116.59 16
 7 7 2 91.99 16
 6 -8 -2 30.6 10.7
 6 -8 -2 49 8.6
 6 -8 -2 30 9
 -6 8 2 24.5 11.3
 -6 8 2 34 32
 5 -8 -2 451.45 40.6
 5 -8 -2 355.16 41.7
 5 -8 -2 318.97 40.5
 -5 8 2 423.96 42.6
 -5 8 2 453.65 68.79
 4 -8 -2 -1.4 4.3
 4 -8 -2 -0.3 5.4
 4 -8 -2 8.3 5.1
 -4 8 2 -4.2 12.3
 -4 8 2 3.3 13.9
 -4 8 2 7.3 6.5
 3 -8 -2 705.23 77.39
 3 -8 -2 881.11 76.89
 -3 8 2 774.32 95.69
 -3 8 2 754.82 84.69
 2 -8 -2 420.16 46.6
 2 -8 -2 525.55 46.2
 -2 8 2 491.15 52.69
 -2 8 2 378.26 47
 -2 8 2 434.46 61.39
 1 -8 -2 909.41 79.69
 1 -8 -2 748.53 80.09
 -1 8 2 661.63 80.29
 -1 8 2 760.92 92.99
 -1 8 2 916.71 84.49
 0 -8 -2 855.71 77.99
 0 -8 -2 827.52 79.19
 0 8 2 750.12 90.29
 0 8 2 725.53 78.99
 -1 -8 -2 77.69 11.2
 -1 -8 -2 85.19 11
 -1 -8 -2 77.69 12.8
 1 8 2 65.19 11.5
 1 8 2 78.79 20.2
 -2 -8 -2 365.66 36
 -2 -8 -2 331.97 38
 -2 -8 -2 345.37 36.5
 2 8 2 358.46 37.6
 2 8 2 338.97 45.2
 -3 -8 -2 32.2 7.4
 -3 -8 -2 32.9 11.8
 -3 -8 -2 29.2 8.4
 -3 -8 -2 22.7 5.7
 3 8 2 33.2 8.6
 3 8 2 36.7 15.1
 -4 -8 -2 40.4 15
 -4 -8 -2 30.3 7.2
 -4 -8 -2 49.8 8.7
 4 8 2 58.39 20.1
 4 8 2 35.3 8.5
 -5 -8 -2 59.69 10.9
 -5 -8 -2 54.19 9.8
 -5 -8 -2 52.09 20.2
 5 8 2 67.19 12.5
 -6 -8 -2 527.75 51.29
 -6 -8 -2 494.45 49.9
 6 8 2 447.66 51.09
 4 -9 -2 458.65 41.4
 4 -9 -2 373.56 42.5
 4 -9 -2 333.37 41.2
 -4 9 2 401.56 53.69
 -4 9 2 430.86 69.29
 3 -9 -2 0.8 7.3
 3 -9 -2 2.1 4.9
 -3 9 2 -6.7 16.7
 -3 9 2 0.9 12
 2 -9 -2 908.41 85.19
 2 -9 -2 891.21 86.39
 -2 9 2 794.62 87.09
 -2 9 2 848.22 105.19
 1 -9 -2 126.49 14.9
 1 -9 -2 107.49 16.6
 -1 9 2 113.29 18
 -1 9 2 108.19 31.2
 0 -9 -2 706.83 71.89
 0 -9 -2 808.62 70.59
 0 9 2 668.63 85.09
 0 9 2 627.34 71.89
 -1 -9 -2 430.26 40.8
 -1 -9 -2 393.66 39.8
 -1 -9 -2 411.66 42.3
 1 9 2 367.56 53.49
 1 9 2 317.87 41.3
 -2 -9 -2 42.1 8.3
 -2 -9 -2 32.8 11
 -2 -9 -2 41.4 8.7
 2 9 2 38.8 9.9
 2 9 2 56.49 20.5
 -3 -9 -2 3.6 4.9
 -3 -9 -2 8.3 7
 -3 -9 -2 18.2 9.9
 3 9 2 6.1 15.9
 3 9 2 7.5 6.8
 -4 -9 -2 10.7 9.3
 -4 -9 -2 19.2 5.9
 -4 -9 -2 22.3 7.1
 4 9 2 34.2 10.1
 4 9 2 27.3 19.8
 2 -10 -2 64.39 12.2
 2 -10 -2 95.29 18.3
 -2 10 2 44.4 28.3
 -2 10 2 38.2 13.4
 1 -10 -2 731.83 84.79
 1 -10 -2 934.51 82.79
 -1 10 2 860.11 105.59
 -1 10 2 770.62 85.19
 0 -10 -2 -4.3 5.7
 0 10 2 3.7 8.7
 0 10 2 3 18.9
 -1 -10 -2 326.87 42
 -1 -10 -2 438.86 41.6
 -1 -10 -2 392.96 40.6
 1 10 2 348.97 43.2
 1 10 2 377.76 59.89
 -2 -10 -2 51.49 11.3
 -2 -10 -2 33.5 12.2
 2 10 2 46.4 25
 4 9 -3 486.45 53.79
 -4 -9 3 510.25 51.09
 3 9 -3 240.08 32.9
 3 9 -3 398.86 54.79
 -3 -9 3 210.48 31.4
 -3 -9 3 288.77 30.1
 -3 -9 3 292.37 31.2
 2 9 -3 626.24 72.19
 2 9 -3 786.22 92.19
 -2 -9 3 781.42 71.29
 -2 -9 3 729.63 70.09
 -2 -9 3 595.24 71.19
 1 9 -3 346.67 59.39
 1 9 -3 327.47 49.1
 -1 -9 3 378.06 41.6
 -1 -9 3 447.96 41.8
 -1 -9 3 393.66 40.2
 0 9 -3 19 21.4
 0 9 -3 77.59 17.2
 0 -9 3 60.79 11.8
 0 -9 3 40.5 9.4
 -1 9 -3 102.99 20
 -1 9 -3 96.29 35.5
 1 -9 3 102.09 14.8
 -2 9 -3 5.1 19.5
 2 -9 3 13.5 12.8
 2 -9 3 6.9 5.4
 2 -9 3 5.6 6
 -3 9 -3 68.59 53.39
 3 -9 3 140.19 16.9
 3 -9 3 128.89 28.5
 3 -9 3 121.79 16.8
 -4 9 -3 1.9 25.6
 4 -9 3 0.6 14.6
 4 -9 3 -2.8 5.8
 4 -9 3 3.5 8
 5 8 -3 305.27 33.5
 -5 -8 3 243.68 33
 -5 -8 3 329.07 31.1
 4 8 -3 1.3 6.4
 -4 -8 3 2.2 5.1
 -4 -8 3 0.7 4.3
 3 8 -3 1206.38 118.49
 -3 -8 3 1258.77 117.59
 -3 -8 3 1140.09 116.49
 2 8 -3 -0.7 14.4
 2 8 -3 14.8 7.1
 -2 -8 3 19.6 6.5
 -2 -8 3 8.5 6.2
 -2 -8 3 7.5 4.4
 1 8 -3 907.41 102.99
 1 8 -3 999.4 117.29
 -1 -8 3 1203.08 102.69
 -1 -8 3 955 102.19
 -1 -8 3 1117.09 101.69
 0 8 -3 256.77 45.3
 0 8 -3 265.67 32.3
 0 -8 3 312.57 30.4
 0 -8 3 297.17 31
 -1 8 -3 51.59 10.4
 -1 8 -3 34.5 18.7
 1 -8 3 33.6 13.2
 1 -8 3 25.5 6
 1 -8 3 44.9 8.4
 -2 8 -3 35.1 19.4
 2 -8 3 55.79 8.8
 2 -8 3 49.2 9.8
 2 -8 3 42.4 16.2
 -3 8 -3 8.1 17.3
 -3 8 -3 13.1 7.5
 -3 8 -3 14.3 8.7
 3 -8 3 11.2 11.4
 3 -8 3 17.7 5.4
 3 -8 3 17.6 5.8
 -4 8 -3 159.78 26.6
 -4 8 -3 144.59 42.9
 -4 8 -3 120.79 31.8
 4 -8 3 144.09 29.8
 4 -8 3 150.48 17.9
 4 -8 3 154.48 18.2
 -5 8 -3 18.4 23.6
 -5 8 -3 8.6 23.6
 5 -8 3 11.9 5.6
 5 -8 3 8.1 6.3
 5 -8 3 15.2 14.7
 5 -8 3 16.3 6.9
 -6 8 -3 468.95 82.89
 6 -8 3 633.54 57.69
 6 -8 3 468.85 52.19
 6 7 -3 93.09 14.8
 -6 -7 3 86.69 13.5
 -6 -7 3 96.89 12.6
 5 7 -3 398.56 35.8
 -5 -7 3 311.97 34.3
 -5 -7 3 259.47 41.2
 -5 -7 3 367.56 33.8
 4 7 -3 706.03 72.59
 -4 -7 3 718.13 71.29
 -4 -7 3 750.02 72.09
 3 7 -3 285.37 32.6
 -3 -7 3 299.37 31.8
 -3 -7 3 317.77 31.4
 2 7 -3 1388.16 154.58
 2 7 -3 1697.73 167.58
 -2 -7 3 1878.51 154.68
 -2 -7 3 1429.86 153.38
 1 7 -3 70.09 21.4
 1 7 -3 61.09 10.7
 -1 -7 3 73.09 9.4
 -1 -7 3 65.79 13.7
 -1 -7 3 57.29 10.2
 0 7 -3 1102.29 117.69
 0 7 -3 891.41 103.69
 0 -7 3 1121.99 109.49
 0 -7 3 1066.59 102.69
 0 -7 3 1086.99 103.19
 -1 7 -3 188.18 34.1
 -1 7 -3 149.99 21.3
 1 -7 3 195.88 20.5
 1 -7 3 200.98 20.3
 1 -7 3 182.18 27.1
 -2 7 -3 45.1 19
 2 -7 3 53.49 8.2
 2 -7 3 45.8 14.9
 2 -7 3 47.3 7.8
 -3 7 -3 32.5 19.3
 -3 7 -3 18.3 8.4
 -3 7 -3 23.2 12.9
 3 -7 3 21.3 5.4
 3 -7 3 22.9 5.4
 3 -7 3 12.1 9.9
 -4 7 -3 61.39 25
 -4 7 -3 69.29 24.2
 4 -7 3 56.09 19.4
 4 -7 3 61.09 9.6
 4 -7 3 51.09 9.5
 -5 7 -3 289.27 53.69
 -5 7 -3 256.07 28.1
 -5 7 -3 245.48 50.79
 5 -7 3 310.57 42.5
 5 -7 3 189.98 27.3
 5 -7 3 320.27 28.3
 5 -7 3 250.27 29.1
 -6 7 -3 85.59 36
 -6 7 -3 57.79 30.9
 -6 7 -3 100.69 14.6
 6 -7 3 72.09 15.1
 6 -7 3 114.49 28.9
 6 -7 3 84.09 13.7
 6 -7 3 100.59 13.2
 -7 7 -3 677.13 120.49
 -7 7 -3 721.13 117.29
 -7 7 -3 912.61 86.99
 7 -7 3 843.42 86.69
 7 -7 3 946.01 86.29
 7 -7 3 1105.59 126.89
 7 6 -3 74.09 12
 -7 -6 3 27.3 24
 -7 -6 3 86.79 10.1
 6 6 -3 283.87 31.2
 -6 -6 3 288.47 31.4
 -6 -6 3 304.77 30.3
 5 6 -3 86.49 11.5
 -5 -6 3 72.19 9.9
 -5 -6 3 53.99 20.8
 -5 -6 3 88.79 11.1
 4 6 -3 1010.3 102.29
 -4 -6 3 1121.59 102.19
 -4 -6 3 1007 101.29
 -3 -6 3 356.76 41.7
 -3 -6 3 419.76 39.1
 2 6 -3 738.13 79.49
 2 6 -3 877.91 90.29
 -2 -6 3 811.22 78.69
 1 6 -3 1442.16 147.59
 1 6 -3 1391.46 137.19
 -1 -6 3 1457.75 140.79
 -1 -6 3 1405.96 136.99
 -1 -6 3 1364.76 136.09
 0 6 -3 41 15.7
 0 6 -3 40.7 7.8
 0 -6 3 38.2 6.3
 0 -6 3 42.7 11
 0 -6 3 45.1 6.9
 -1 6 -3 1293.37 140.89
 -1 6 -3 1229.18 128.99
 1 -6 3 1359.66 134.89
 1 -6 3 1393.56 128.09
 1 -6 3 1339.07 128.09
 -2 6 -3 67.29 20.5
 -2 6 -3 57.49 14.1
 -2 6 -3 63.19 10.9
 2 -6 3 67.49 8.9
 2 -6 3 70.69 15.6
 2 -6 3 71.49 8.8
 -3 6 -3 2.9 10.6
 -3 6 -3 11.5 12.6
 3 -6 3 8 3.4
 3 -6 3 4 7.2
 3 -6 3 6.5 3
 -4 6 -3 102.49 29.8
 -4 6 -3 141.39 16.3
 -4 6 -3 132.89 32.6
 4 -6 3 141.29 16
 4 -6 3 135.39 16.1
 4 -6 3 138.79 24.9
 4 -6 3 173.38 16.8
 -5 6 -3 326.97 34.6
 -5 6 -3 316.07 53.89
 -5 6 -3 280.77 54.99
 5 -6 3 317.97 34.4
 5 -6 3 390.16 47.7
 5 -6 3 386.16 34.7
 5 -6 3 308.47 34.5
 -6 6 -3 553.04 99.89
 -6 6 -3 612.84 60.79
 -6 6 -3 502.15 82.09
 6 -6 3 571.64 60.69
 6 -6 3 700.63 76.29
 6 -6 3 544.25 60.39
 6 -6 3 715.03 60.79
 -7 6 -3 172.88 52.39
 -7 6 -3 194.08 63.09
 -7 6 -3 230.48 23.6
 7 -6 3 203.98 21.9
 7 -6 3 174.88 22.6
 7 -6 3 144.99 25.9
 -8 6 -3 778.22 132.39
 -8 6 -3 888.31 89.39
 8 -6 3 982.4 110.29
 8 -6 3 887.61 88.19
 8 5 -3 92.39 12
 8 5 -3 66.99 15.4
 -8 -5 3 27.9 33
 -8 -5 3 67.09 12.3
 -8 -5 3 75.69 13.7
 7 5 -3 -0.6 4.2
 -7 -5 3 7.1 5
 -7 -5 3 3.1 21.6
 -7 -5 3 5.8 3.4
 -6 -5 3 6.3 4
 -6 -5 3 15.7 18.4
 5 5 -3 373.46 37.9
 -5 -5 3 384.46 37.2
 -5 -5 3 355.46 37.9
 4 5 -3 13.6 4
 -4 -5 3 3.5 2.6
 -4 -5 3 2.8 10.9
 -4 -5 3 3.9 2.6
 3 5 -3 2347.67 234.48
 -3 -5 3 2665.23 234.48
 -3 -5 3 2418.26 233.88
 -3 -5 3 2343.77 242.28
 2 5 -3 859.41 80.59
 2 5 -3 624.94 70.89
 -2 -5 3 769.52 70.59
 -2 -5 3 709.23 72.89
 -2 -5 3 692.73 72.19
 1 5 -3 2394.56 231.88
 1 5 -3 2139.69 223.08
 -1 -5 3 2234.78 225.98
 -1 -5 3 2532.95 222.68
 0 5 -3 1054.79 114.49
 0 5 -3 1200.78 123.69
 0 -5 3 1225.08 113.99
 0 -5 3 1199.48 118.79
 0 -5 3 1220.48 114.29
 -1 5 -3 393.06 42
 -1 5 -3 410.86 51.49
 1 -5 3 421.06 47.1
 1 -5 3 410.56 41.2
 1 -5 3 439.96 41.4
 -2 5 -3 76.09 19.3
 -2 5 -3 92.79 18
 2 -5 3 91.49 10.3
 2 -5 3 74.69 15.2
 2 -5 3 91.69 10.1
 -3 5 -3 4.6 3.1
 -3 5 -3 5.4 7.5
 -3 5 -3 7.4 11.3
 3 -5 3 5.7 2.9
 3 -5 3 5.8 2.6
 3 -5 3 12.1 8.6
 -4 5 -3 119.49 14.1
 -4 5 -3 99.79 26.1
 -4 5 -3 111.69 28.5
 4 -5 3 128.99 14.1
 4 -5 3 119.39 14.4
 4 -5 3 135.29 14.2
 4 -5 3 139.19 23
 -5 5 -3 38.5 19.2
 -5 5 -3 29.3 22
 -5 5 -3 49 7.6
 5 -5 3 43.4 15.2
 5 -5 3 28.9 6.3
 5 -5 3 26.6 6
 5 -5 3 43.9 6.9
 -6 5 -3 998.5 91.99
 -6 5 -3 799.32 110.09
 -6 5 -3 939.11 122.49
 6 -5 3 773.22 91.59
 6 -5 3 1116.79 106.69
 6 -5 3 898.81 91.69
 6 -5 3 1045.1 91.69
 -7 5 -3 205.58 22.3
 -7 5 -3 155.88 52.69
 -7 5 -3 153.28 42.2
 7 -5 3 226.98 21.3
 7 -5 3 247.08 38.1
 7 -5 3 145.19 21
 7 -5 3 164.18 21.1
 -8 5 -3 436.06 78.69
 -8 5 -3 475.55 97.29
 -8 5 -3 560.54 54.49
 8 -5 3 584.44 53.09
 8 -5 3 597.34 77.79
 8 -5 3 447.66 53.39
 9 4 -3 213.98 22.6
 -9 -4 3 135.49 64.99
 8 4 -3 34.7 16.7
 8 4 -3 25.8 6.2
 -8 -4 3 24.7 7.2
 -8 -4 3 35.8 32.7
 -8 -4 3 28.1 7.8
 7 4 -3 12.4 7.7
 7 4 -3 10.6 4.4
 -7 -4 3 8.2 5.1
 -7 -4 3 11.8 5.1
 -7 -4 3 9.2 3.3
 -7 -4 3 0.3 20.6
 6 4 -3 11.7 6.9
 6 4 -3 5.1 3.4
 -6 -4 3 6.3 2.6
 -6 -4 3 0.3 2.8
 -6 -4 3 0.5 15.9
 5 4 -3 16.4 5.9
 5 4 -3 44.2 6.1
 -5 -4 3 15.3 16.1
 -5 -4 3 33.7 5.2
 -5 -4 3 39.8 6.4
 4 4 -3 1113.79 100.79
 -4 -4 3 1053.29 100.89
 -4 -4 3 1097.59 100.29
 -4 -4 3 865.91 112.79
 3 4 -3 7.5 3.2
 -3 -4 3 4.1 1.7
 -3 -4 3 11.1 9.4
 2 4 -3 4046.6 449.76
 -2 -4 3 4588.84 449.86
 -2 -4 3 4833.72 451.35
 -2 -4 3 5065.49 449.66
 -2 -4 3 5048.9 456.35
 1 4 -3 62.49 8.1
 1 4 -3 68.29 13.9
 -1 -4 3 64.59 10.2
 -1 -4 3 64.69 7.7
 0 4 -3 3494.15 340.37
 0 4 -3 3548.24 347.87
 0 -4 3 3737.33 340.07
 0 -4 3 3582.94 344.17
 0 -4 3 3451.75 339.87
 -1 4 -3 171.28 19.4
 -1 4 -3 140.49 23.7
 -1 4 -3 146.69 17.1
 1 -4 3 169.38 16.8
 1 -4 3 167.58 21.8
 1 -4 3 154.68 16.5
 -2 4 -3 572.14 66.39
 -2 4 -3 633.54 58.59
 -2 4 -3 595.14 68.39
 2 -4 3 535.15 58.09
 2 -4 3 636.04 58.69
 2 -4 3 639.74 65.49
 -3 4 -3 23.1 13.3
 -3 4 -3 17.7 4
 -3 4 -3 13.5 8.4
 3 -4 3 26 4.3
 3 -4 3 24.9 4.1
 3 -4 3 20.4 9.3
 -4 4 -3 83.29 20.5
 -4 4 -3 86.99 25.8
 -4 4 -3 86.49 10.2
 4 -4 3 90.99 18
 4 -4 3 91.69 10.2
 4 -4 3 70.99 10
 4 -4 3 93.39 10.4
 -5 4 -3 429.36 40.4
 -5 4 -3 390.66 54.99
 -5 4 -3 350.06 59.89
 5 -4 3 467.45 51.19
 5 -4 3 351.66 39.9
 5 -4 3 437.46 40.3
 5 -4 3 368.36 40.2
 -6 4 -3 269.47 47.4
 -6 4 -3 332.37 32.7
 -6 4 -3 294.97 56.69
 6 -4 3 349.57 44
 6 -4 3 373.26 32.3
 6 -4 3 259.27 31.9
 6 -4 3 288.07 32.1
 -7 4 -3 1053.29 94.69
 -7 4 -3 819.52 112.09
 -7 4 -3 782.22 123.09
 7 -4 3 1143.99 108.79
 7 -4 3 1039.7 93.69
 7 -4 3 839.62 93.89
 -8 4 -3 60.69 39.8
 -8 4 -3 52.59 11.3
 -8 4 -3 39.1 26.5
 8 -4 3 61.39 11.2
 8 -4 3 44.2 10
 8 -4 3 82.59 25.1
 -9 4 -3 379.16 77.59
 -9 4 -3 447.76 103.79
 -9 4 -3 521.65 53.29
 9 -4 3 623.04 51.79
 9 -4 3 449.86 52.49
 9 3 -3 66.59 10.3
 9 3 -3 43.9 13.9
 -9 -3 3 68.69 11.7
 -9 -3 3 24.5 61.69
 -9 -3 3 84.39 13.6
 8 3 -3 226.98 28.2
 8 3 -3 202.98 23.7
 -8 -3 3 136.99 54.19
 -8 -3 3 276.37 25.8
 -8 -3 3 260.07 26.4
 7 3 -3 0.7 4.9
 7 3 -3 6.1 3.2
 -7 -3 3 10.7 5
 -7 -3 3 5.8 4.3
 -7 -3 3 5.8 19.6
 6 3 -3 6.9 3
 6 3 -3 17.4 5.6
 -6 -3 3 6.9 4.3
 -6 -3 3 9.3 4
 -6 -3 3 3.3 16.2
 -6 -3 3 9.4 2.8
 5 3 -3 127.39 15.7
 5 3 -3 117.59 13.5
 -5 -3 3 148.29 14.6
 -5 -3 3 117.29 13.2
 4 3 -3 696.23 66.89
 4 3 -3 618.94 67.99
 -4 -3 3 722.93 67.39
 -4 -3 3 704.13 66.59
 3 3 -3 1012 88.89
 3 3 -3 860.01 87.59
 -3 -3 3 971.1 87.49
 -3 -3 3 806.52 87.79
 2 3 -3 1605.44 153.18
 -2 -3 3 1485.65 152.78
 -2 -3 3 1843.42 153.38
 -2 -3 3 1480.25 153.78
 1 3 -3 6567.64 566.34
 1 3 -3 5284.77 559.64
 -1 -3 3 5920.21 562.04
 -1 -3 3 5993.9 562.34
 -1 -3 3 5641.14 559.44
 0 3 -3 567.24 62.99
 0 3 -3 501.65 57.09
 0 -3 3 629.64 57.09
 0 -3 3 662.73 63.59
 -1 3 -3 2151.08 188.78
 -1 3 -3 1831.72 184.78
 -1 3 -3 2030.7 192.38
 1 -3 3 1859.41 184.18
 1 -3 3 1756.52 184.38
 1 -3 3 1960.7 189.58
 -2 3 -3 202.18 28.5
 -2 3 -3 217.58 20.9
 -2 3 -3 205.28 29.2
 2 -3 3 217.28 21.2
 2 -3 3 190.98 20.7
 2 -3 3 219.98 27.1
 -3 3 -3 157.78 16.5
 -3 3 -3 161.68 25.4
 -3 3 -3 154.68 27.9
 3 -3 3 184.18 17
 3 -3 3 172.68 23.4
 3 -3 3 160.38 16.5
 3 -3 3 138.79 16.6
 -4 3 -3 34.9 5.4
 -4 3 -3 26.4 15.8
 -4 3 -3 44.6 15.2
 4 -3 3 24.2 4.8
 4 -3 3 30.4 5
 4 -3 3 35.1 11.3
 4 -3 3 34 5.2
 -5 3 -3 386.66 54.39
 -5 3 -3 500.35 42.9
 -5 3 -3 450.65 64.49
 5 -3 3 462.45 42.4
 5 -3 3 375.66 42.2
 5 -3 3 383.86 42.2
 -6 3 -3 653.83 59.19
 -6 3 -3 515.35 84.39
 -6 3 -3 563.04 73.39
 -7 3 -3 240.58 47.8
 -7 3 -3 423.26 35.7
 -7 3 -3 268.27 61.39
 7 -3 3 284.57 34.3
 7 -3 3 402.46 34.5
 -8 3 -3 863.11 137.29
 -8 3 -3 1165.18 102.79
 8 -3 3 1223.78 115.99
 8 -3 3 1091.79 101.29
 8 -3 3 804.62 101.49
 -9 3 -3 -11.7 48
 -9 3 -3 6.9 21.8
 -9 3 -3 -2.3 8
 9 -3 3 4.2 15.5
 9 -3 3 3.4 5.8
 9 -3 3 7.6 7.3
 9 2 -3 330.97 31.3
 9 2 -3 238.68 35.5
 -9 -2 3 343.37 34.4
 -9 -2 3 265.47 78.99
 -9 -2 3 306.37 33.1
 8 2 -3 253.27 24.5
 8 2 -3 186.78 27.6
 -8 -2 3 263.47 27.1
 -8 -2 3 192.28 58.59
 -8 -2 3 248.78 26
 7 2 -3 285.57 28.2
 7 2 -3 297.07 31.7
 -7 -2 3 298.67 30.2
 -7 -2 3 252.07 29.4
 6 2 -3 2.3 2.1
 6 2 -3 -0.2 3.7
 -6 -2 3 2.8 2.9
 5 2 -3 525.65 55.19
 5 2 -3 533.65 53.29
 -5 -2 3 526.15 53.09
 -5 -2 3 597.64 54.49
 -5 -2 3 573.04 54.49
 4 2 -3 162.18 19.8
 4 2 -3 178.78 18.5
 -4 -2 3 206.68 18.5
 -4 -2 3 176.48 19.2
 3 2 -3 2168.18 215.08
 3 2 -3 2380.76 216.28
 -3 -2 3 2241.58 215.58
 -3 -2 3 2236.88 214.98
 2 2 -3 962.8 87.69
 -2 -2 3 855.51 86.89
 -2 -2 3 879.71 87.19
 -2 -2 3 931.21 87.79
 1 2 -3 1600.04 170.98
 -1 -2 3 1727.93 170.88
 -1 -2 3 2045.4 173.78
 0 2 -3 2078.49 219.68
 0 2 -3 2271.47 214.98
 0 -2 3 2204.58 214.68
 0 -2 3 2448.16 218.78
 -1 2 -3 166.88 24.4
 -1 2 -3 198.98 21.7
 1 -2 3 158.68 16.2
 1 -2 3 143.69 16.9
 -2 2 -3 1788.62 170.08
 -2 2 -3 1755.02 177.58
 -2 2 -3 1650.53 178.78
 2 -2 3 1813.62 170.08
 2 -2 3 1896.61 176.58
 -3 2 -3 4.6 5.5
 -3 2 -3 2.8 7.6
 -3 2 -3 4.9 2
 3 -2 3 3.8 1.7
 3 -2 3 4.1 5.3
 3 -2 3 6.1 2.1
 -4 2 -3 7.7 2.9
 -4 2 -3 5.7 6.1
 -4 2 -3 13.7 12.3
 4 -2 3 4.7 2.4
 4 -2 3 3.6 4.9
 4 -2 3 5.2 2.3
 -5 2 -3 32.2 5.5
 -5 2 -3 25.3 5.1
 -5 2 -3 15.7 15.9
 -5 2 -3 18.5 11.6
 5 -2 3 14.5 4.2
 5 -2 3 31.1 12
 -6 2 -3 409.66 67.29
 -6 2 -3 439.76 45.1
 -6 2 -3 345.67 54.89
 -6 2 -3 504.75 45.4
 6 -2 3 506.35 54.39
 -7 2 -3 692.73 59.29
 -7 2 -3 548.15 72.69
 -7 2 -3 516.75 85.39
 7 -2 3 550.44 58.49
 -8 2 -3 707.83 57.39
 -8 2 -3 488.05 90.69
 -8 2 -3 472.65 70.99
 8 -2 3 516.75 56.29
 -9 2 -3 826.52 80.39
 -9 2 -3 621.44 121.69
 -9 2 -3 877.91 80.59
 9 -2 3 855.91 77.69
 9 -2 3 632.04 84.59
 9 1 -3 849.61 76.79
 -9 -1 3 833.62 80.49
 -9 -1 3 717.43 80.99
 -9 -1 3 650.93 123.29
 8 1 -3 59.49 12.3
 8 1 -3 63.59 7.8
 -8 -1 3 73.69 11.2
 -8 -1 3 46.8 14.8
 -8 -1 3 73.19 10.2
 7 1 -3 328.17 34.1
 7 1 -3 330.07 37.2
 -7 -1 3 398.76 36
 -7 -1 3 322.67 40
 -7 -1 3 381.86 36.4
 6 1 -3 132.59 14.2
 6 1 -3 134.99 16.8
 -6 -1 3 135.59 15.7
 -6 -1 3 186.88 16.7
 -6 -1 3 128.59 18.9
 5 1 -3 2.2 2.8
 5 1 -3 4.8 1.7
 -5 -1 3 3.6 2.6
 -5 -1 3 4.1 3.9
 -5 -1 3 1.6 1.9
 4 1 -3 1524.95 144.69
 4 1 -3 1506.75 146.19
 -4 -1 3 1454.45 145.69
 -4 -1 3 1629.74 146.99
 -4 -1 3 1502.05 144.59
 -4 -1 3 1464.55 145.59
 3 1 -3 4.7 1.2
 3 1 -3 2 1.6
 -3 -1 3 3.7 1.9
 -3 -1 3 5.7 1.2
 -3 -1 3 2.4 1.5
 -3 -1 3 1.8 1.4
 2 1 -3 2198.88 208.38
 -2 -1 3 2364.36 208.38
 -2 -1 3 1996.6 208.78
 1 1 -3 550.24 56.39
 1 1 -3 629.14 56.29
 -1 -1 3 589.24 56.39
 -1 -1 3 549.45 56.09
 -1 -1 3 615.74 58.79
 0 1 -3 6044.2 557.44
 0 -1 3 5650.63 557.44
 -1 1 -3 2794.92 301.57
 -1 1 -3 3070.09 296.37
 1 -1 3 3502.75 302.57
 1 -1 3 3109.99 296.37
 -2 1 -3 451.15 37.9
 -2 1 -3 363.76 44.1
 -2 1 -3 380.26 46.6
 2 -1 3 371.46 37.8
 2 -1 3 378.86 38.1
 -3 1 -3 1375.26 136.79
 -3 1 -3 1321.57 122.59
 -3 1 -3 1269.27 122.69
 -3 1 -3 1283.97 129.99
 3 -1 3 1170.68 122.59
 -4 1 -3 -0.7 1.6
 -4 1 -3 0.5 1.5
 -4 1 -3 1.5 4.1
 -4 1 -3 6.5 9.6
 4 -1 3 0.7 1.4
 4 -1 3 1.2 4.4
 -5 1 -3 230.68 36.8
 -5 1 -3 238.68 45.2
 -5 1 -3 304.37 29.5
 -5 1 -3 338.87 29.7
 5 -1 3 324.17 36.5
 5 -1 3 265.47 29.3
 -6 1 -3 272.47 42.4
 -6 1 -3 263.97 51.99
 -6 1 -3 351.86 33.3
 -6 1 -3 331.77 33.1
 6 -1 3 378.66 41.2
 6 -1 3 297.17 33.1
 -7 1 -3 782.02 116.89
 -7 1 -3 1027 91.49
 -7 1 -3 1017.8 91.49
 7 -1 3 839.62 91.29
 -8 1 -3 167.38 52.09
 -8 1 -3 216.08 22.8
 -8 1 -3 154.28 34.3
 -8 1 -3 193.88 22.9
 8 -1 3 188.08 23.3
 8 -1 3 243.98 31.8
 8 -1 3 195.28 20.7
 -9 1 -3 1041.2 98.99
 -9 1 -3 1086.09 99.29
 9 -1 3 862.21 98.99
 9 -1 3 998.4 96.69
 10 -1 3 324.47 33.5
 9 0 -3 8.5 3.1
 9 0 -3 9.3 7.1
 -9 0 3 7.7 7.5
 -9 0 3 6.4 6
 -9 0 3 44.1 51.29
 -9 0 3 9.2 13.3
 8 0 -3 575.04 54.49
 8 0 -3 531.55 57.89
 -8 0 3 627.24 56.99
 -8 0 3 641.84 57.59
 -8 0 3 454.45 63.39
 7 0 -3 3.6 1.8
 7 0 -3 13 5.1
 -7 0 3 2.2 3.4
 -7 0 3 1 7
 -7 0 3 3.6 2.9
 6 0 -3 26 4.2
 6 0 -3 28.3 6.4
 -6 0 3 32.1 6.2
 -6 0 3 27 10
 -6 0 3 34.5 5.8
 5 0 -3 568.14 55.99
 5 0 -3 566.34 53.99
 -5 0 3 587.64 55.39
 -5 0 3 548.35 55.49
 -5 0 3 542.65 59.19
 4 0 -3 557.24 50.69
 4 0 -3 463.05 51.99
 -4 0 3 476.05 51.79
 -4 0 3 600.54 55.39
 -4 0 3 528.15 51.79
 3 0 -3 3141.99 296.07
 3 0 -3 2959.5 294.77
 -3 0 3 3205.78 297.67
 2 0 -3 802.02 73.39
 2 0 -3 668.23 74.09
 2 0 -3 660.23 74.69
 -2 0 3 893.21 74.19
 -2 0 3 763.32 74.19
 -2 0 3 812.52 73.39
 1 0 -3 5165.48 549.35
 -1 0 3 6264.67 549.95
 0 0 -3 6.5 0.9
 0 0 -3 6.3 2.4
 0 0 3 5.3 2.6
 0 0 3 4.4 0.8
 -2 0 -3 812.42 68.19
 -2 0 -3 649.04 72.79
 2 0 3 658.63 68.09
 -3 0 -3 19 11
 -3 0 -3 38 9.1
 -3 0 -3 32 4.3
 3 0 3 23.9 4.1
 3 0 3 52.29 10.1
 -4 0 -3 24.1 9.3
 -4 0 -3 27.7 4.3
 -4 0 -3 21 12.8
 -4 0 -3 22.8 4.1
 4 0 3 21 4.2
 4 0 3 40.9 9.8
 -5 0 -3 7.5 12.1
 -5 0 -3 0 4.6
 -5 0 -3 1.2 1.9
 -5 0 -3 3.1 2.5
 5 0 3 2.3 5.2
 5 0 3 2.3 2.3
 -6 0 -3 842.02 79.19
 -6 0 -3 658.03 99.09
 -6 0 -3 850.11 79.09
 6 0 3 837.92 77.99
 6 0 3 785.52 79.59
 -7 0 -3 24.2 5.8
 -7 0 -3 18.5 11.5
 -7 0 -3 11.4 16.4
 -7 0 -3 39.3 6.6
 7 0 3 27.1 7.2
 7 0 3 23 4.6
 7 0 3 32.3 11.5
 -8 0 -3 1409.06 133.19
 -8 0 -3 1364.16 133.19
 8 0 3 1238.78 133.79
 8 0 3 1436.86 131.69
 -9 0 -3 5.8 14.5
 -9 0 -3 6.8 31.1
 -9 0 -3 7.4 6.5
 -9 0 -3 2.2 5.3
 9 0 3 12.2 4
 9 0 3 2.9 10.1
 9 0 3 4.7 6.4
 -10 0 -3 698.93 174.18
 -10 0 -3 960.4 92.79
 10 0 3 913.61 89.99
 10 0 3 1017.1 103.49
 9 -1 -3 468.05 42
 9 -1 -3 406.26 46
 -9 1 3 431.16 45.9
 -9 1 3 363.06 56.29
 -9 1 3 430.46 45.3
 8 -1 -3 73.49 8.6
 8 -1 -3 78.79 12.9
 -8 1 3 80.09 23
 -8 1 3 90.29 11.9
 -8 1 3 101.49 13.2
 7 -1 -3 324.97 32.8
 7 -1 -3 309.27 34.5
 -7 1 3 359.36 34.6
 -7 1 3 302.77 42
 -7 1 3 337.97 33.9
 6 -1 -3 19 3.1
 6 -1 -3 25.2 6.1
 -6 1 3 36.3 12.5
 -6 1 3 31.4 6.4
 -6 1 3 28.2 5.6
 5 -1 -3 85.39 11.5
 5 -1 -3 102.99 9.9
 -5 1 3 97.29 16.3
 -5 1 3 99.39 11.4
 -5 1 3 100.69 11.9
 4 -1 -3 4.9 2.2
 4 -1 -3 3.7 2.6
 -4 1 3 7.7 2.5
 -4 1 3 7.6 4.5
 -4 1 3 2.4 1.8
 3 -1 -3 1494.85 161.38
 3 -1 -3 1935.01 160.58
 -3 1 3 1549.34 164.48
 -3 1 3 1697.83 161.38
 -3 1 3 1739.43 161.78
 2 -1 -3 3908.71 407.66
 2 -1 -3 4731.43 406.66
 2 -1 -3 4348.17 407.16
 -2 1 3 4102.59 409.86
 1 -1 -3 2256.17 210.38
 1 -1 -3 2275.57 209.78
 1 -1 -3 2204.68 209.98
 -1 1 3 2090.99 209.78
 0 -1 -3 5211.48 506.15
 0 1 3 5138.49 506.45
 -1 -1 -3 942.61 90.59
 -1 -1 -3 1051.59 95.99
 -1 -1 -3 924.81 90.49
 1 1 3 920.91 90.49
 1 1 3 913.81 90.59
 -2 -1 -3 2717.53 248.78
 -2 -1 -3 2626.34 238.08
 2 1 3 2517.95 237.88
 2 1 3 2152.58 237.98
 -3 -1 -3 14.3 5.8
 -3 -1 -3 11.4 8.9
 -3 -1 -3 15.8 2.9
 3 1 3 30.4 8.7
 3 1 3 13.2 3.3
 3 1 3 15.3 2.6
 -4 -1 -3 45.2 18.1
 -4 -1 -3 31.1 9.1
 -4 -1 -3 49.8 5.9
 4 1 3 53.29 11.1
 4 1 3 38.9 5.1
 4 1 3 33.1 5.8
 -5 -1 -3 39.9 5.7
 -5 -1 -3 25.9 9.8
 -5 -1 -3 32 17.4
 5 1 3 38.5 9.7
 5 1 3 33.1 5.8
 5 1 3 36 4.8
 -6 -1 -3 291.57 30.2
 -6 -1 -3 222.98 47.8
 -6 -1 -3 288.97 30.2
 6 1 3 282.97 29.2
 6 1 3 338.37 35
 -7 -1 -3 371.76 34.7
 -7 -1 -3 281.77 57.89
 -7 -1 -3 355.46 34
 7 1 3 280.57 34.6
 7 1 3 320.77 32.6
 -8 -1 -3 398.76 77.49
 -8 -1 -3 509.45 49.5
 -8 -1 -3 512.65 49.8
 8 1 3 437.66 47.7
 8 1 3 548.75 53.89
 8 1 3 452.25 50.59
 -9 -1 -3 913.21 80.09
 -9 -1 -3 850.01 79.99
 -9 -1 -3 615.94 113.39
 9 1 3 684.63 80.59
 9 1 3 828.12 77.89
 -10 -1 -3 18.7 56.29
 -10 -1 -3 17.6 8.8
 10 1 3 9.5 5.5
 9 -2 -3 693.33 71.39
 -9 2 3 673.53 67.29
 -9 2 3 581.64 80.39
 -9 2 3 683.93 67.09
 8 -2 -3 340.97 30.4
 8 -2 -3 289.67 33.6
 8 -2 -3 298.17 29.9
 -8 2 3 331.27 33.8
 -8 2 3 287.67 32.5
 -8 2 3 259.77 49.5
 7 -2 -3 31.7 4.3
 7 -2 -3 23.1 6.4
 7 -2 -3 35.4 4.9
 -7 2 3 21.7 6.9
 -7 2 3 30.7 14.5
 -7 2 3 42.6 7.3
 6 -2 -3 191.78 24.5
 6 -2 -3 276.37 23.3
 6 -2 -3 201.58 25.1
 -6 2 3 251.27 24.9
 -6 2 3 224.88 25.3
 -6 2 3 223.38 32.6
 5 -2 -3 186.08 18.3
 5 -2 -3 186.38 20.4
 5 -2 -3 168.38 19.5
 -5 2 3 178.78 26.1
 -5 2 3 190.28 20.3
 -5 2 3 188.68 19.6
 4 -2 -3 443.16 38.1
 4 -2 -3 374.86 39.5
 4 -2 -3 337.17 38.8
 -4 2 3 393.96 39.6
 -4 2 3 400.76 39
 -4 2 3 396.96 44.9
 3 -2 -3 119.49 13.3
 3 -2 -3 144.09 12.8
 3 -2 -3 108.19 13.7
 -3 2 3 138.49 13.6
 -3 2 3 127.39 17.9
 -3 2 3 117.19 13.8
 2 -2 -3 2681.63 271.67
 2 -2 -3 3062.19 271.37
 2 -2 -3 2766.92 272.07
 -2 2 3 2696.73 271.97
 -2 2 3 2912.01 271.37
 -2 2 3 2975.4 276.07
 1 -2 -3 1258.77 117.79
 1 -2 -3 1186.08 117.29
 -1 2 3 1294.67 117.79
 -1 2 3 1261.77 121.29
 -1 2 3 1153.68 117.29
 0 -2 -3 4541.15 434.56
 0 2 3 4528.15 434.76
 -1 -2 -3 7508.45 753.12
 1 2 3 8235.38 754.12
 -2 -2 -3 2900.61 257.57
 -2 -2 -3 2378.86 245.88
 2 2 3 2533.75 246.28
 2 2 3 2550.64 245.98
 -3 -2 -3 1156.28 102.19
 -3 -2 -3 1023.3 101.59
 -3 -2 -3 1002.5 114.29
 3 2 3 1046.6 101.69
 -4 -2 -3 7.4 2.6
 -4 -2 -3 6.4 9
 4 2 3 18.2 7.3
 4 2 3 5.9 2
 4 2 3 8.1 2.6
 -5 -2 -3 68.69 24.3
 -5 -2 -3 122.99 12.3
 5 2 3 96.79 12.7
 5 2 3 104.39 11.3
 -6 -2 -3 3.2 2.7
 -6 -2 -3 6.3 14.9
 6 2 3 0.1 3.4
 6 2 3 7.6 4.9
 6 2 3 6.3 2.4
 -7 -2 -3 1089.59 103.29
 -7 -2 -3 1140.39 103.39
 7 2 3 1138.99 105.19
 7 2 3 965.6 104.29
 7 2 3 937.91 101.99
 -8 -2 -3 246.08 28.6
 -8 -2 -3 266.77 29.1
 8 2 3 272.97 27.5
 8 2 3 296.57 30.3
 8 2 3 207.08 29.8
 -9 -2 -3 260.47 31.3
 -9 -2 -3 223.38 66.69
 -9 -2 -3 279.97 29.7
 9 2 3 271.87 35.4
 9 2 3 248.78 27
 9 -3 -3 1.5 3
 9 -3 -3 0.6 2.5
 9 -3 -3 11.1 8.6
 -9 3 3 0.1 17.8
 -9 3 3 7 10.7
 8 -3 -3 753.52 87.89
 8 -3 -3 979.2 85.39
 8 -3 -3 952.8 85.09
 -8 3 3 870.01 88.29
 -8 3 3 785.82 101.79
 7 -3 -3 165.98 21.9
 7 -3 -3 199.98 22.9
 7 -3 -3 214.68 20
 -7 3 3 190.78 33.6
 -7 3 3 193.08 22.7
 6 -3 -3 60.49 10.7
 6 -3 -3 76.79 8.1
 6 -3 -3 60.89 9.8
 -6 3 3 79.59 10.9
 -6 3 3 66.99 18.5
 5 -3 -3 47.6 7.9
 5 -3 -3 45.9 7
 5 -3 -3 48.1 5.8
 -5 3 3 43.7 14.1
 -5 3 3 49 7.9
 4 -3 -3 42.5 6.9
 4 -3 -3 39.3 6
 4 -3 -3 57.99 5.7
 -4 3 3 49.5 7
 -4 3 3 32.8 11.1
 3 -3 -3 1163.78 120.09
 3 -3 -3 1285.77 120.79
 -3 3 3 1305.07 120.69
 -3 3 3 1255.17 126.89
 2 -3 -3 125.29 13.6
 2 -3 -3 130.19 13.1
 -2 3 3 129.29 13.5
 -2 3 3 126.39 18
 -2 3 3 118.19 12.9
 1 -3 -3 4509.05 428.86
 -1 3 3 4467.85 428.46
 -1 3 3 4681.63 428.86
 -1 3 3 4371.66 432.36
 -1 3 3 4471.35 432.96
 0 -3 -3 169.18 16.5
 0 -3 -3 165.88 19.7
 0 -3 -3 144.59 16.7
 0 3 3 166.88 20.1
 0 3 3 166.68 16.9
 0 3 3 183.18 20.3
 0 3 3 146.79 16.5
 -1 -3 -3 4840.42 533.35
 -1 -3 -3 5644.44 533.45
 -1 -3 -3 5973.6 538.65
 1 3 3 5112.29 533.45
 1 3 3 6482.85 540.35
 -2 -3 -3 962 90.19
 -2 -3 -3 952.7 99.09
 -2 -3 -3 966.5 89.99
 2 3 3 863.41 89.99
 -3 -3 -3 1049.49 115.69
 -3 -3 -3 1071.89 103.99
 -3 -3 -3 1107.79 103.59
 3 3 3 1074.99 103.69
 3 3 3 1075.09 104.29
 -4 -3 -3 108.49 24.9
 -4 -3 -3 113.79 12.1
 -4 -3 -3 139.99 13
 4 3 3 105.69 12.1
 4 3 3 91.59 12.8
 -5 -3 -3 4.2 2.7
 -5 -3 -3 2.8 11.4
 5 3 3 -0.1 2.5
 5 3 3 8.7 2.8
 5 3 3 3.4 3.7
 -6 -3 -3 258.87 52.09
 -6 -3 -3 446.96 40.2
 6 3 3 337.07 33.9
 -7 -3 -3 11.4 17.7
 -7 -3 -3 12.9 5
 7 3 3 17.2 7.2
 7 3 3 11.5 3.5
 -8 -3 -3 699.83 68.29
 -8 -3 -3 708.73 68.59
 8 3 3 587.74 69.89
 8 3 3 713.93 67.19
 -9 -3 -3 134.19 15.3
 -9 -3 -3 94.09 18.1
 -9 -3 -3 58.69 41.6
 9 3 3 88.19 13
 9 3 3 99.39 18.8
 9 -4 -3 669.33 72.69
 -9 4 3 815.42 73.49
 -9 4 3 639.04 93.09
 8 -4 -3 23.5 9.9
 8 -4 -3 37.5 6.3
 8 -4 -3 33.1 8
 -8 4 3 34.7 22
 -8 4 3 25.6 9
 7 -4 -3 1060.49 109.49
 7 -4 -3 1018.2 109.99
 7 -4 -3 1229.28 107.69
 -7 4 3 1068.39 124.69
 -7 4 3 1174.68 110.39
 6 -4 -3 8.4 2.8
 6 -4 -3 4.5 4.6
 6 -4 -3 2.9 3.9
 -6 4 3 6.7 4.9
 -6 4 3 10.2 10.7
 5 -4 -3 37.3 5.1
 5 -4 -3 35.4 7.6
 5 -4 -3 30.8 6.5
 -5 4 3 37 7.4
 4 -4 -3 234.08 26.3
 4 -4 -3 261.47 25.8
 4 -4 -3 249.08 27
 -4 4 3 296.17 27.4
 -4 4 3 256.17 35.6
 3 -4 -3 744.93 68.49
 3 -4 -3 669.63 69.39
 3 -4 -3 727.73 68.99
 -3 4 3 786.02 69.59
 -3 4 3 680.93 76.89
 -3 4 3 643.94 68.69
 2 -4 -3 1333.37 132.69
 2 -4 -3 1410.56 132.09
 -2 4 3 1312.37 132.29
 -2 4 3 1430.06 132.89
 -2 4 3 1409.16 139.69
 1 -4 -3 1139.29 104.39
 1 -4 -3 1074.49 104.79
 -1 4 3 1176.28 105.19
 -1 4 3 1026.7 104.49
 -1 4 3 1109.39 110.39
 -1 4 3 998.7 108.49
 0 -4 -3 2796.62 274.17
 0 -4 -3 2892.91 273.77
 0 4 3 3074.39 278.97
 0 4 3 2679.93 273.97
 0 4 3 2899.41 278.27
 -1 -4 -3 3.7 2.5
 -1 -4 -3 2.8 1.6
 -1 -4 -3 6.8 4.6
 1 4 3 3.6 5.5
 1 4 3 10 2.7
 1 4 3 6.3 4.3
 -2 -4 -3 2608.54 241.68
 -2 -4 -3 2635.54 249.38
 -2 -4 -3 2480.05 241.38
 2 4 3 2470.55 241.58
 2 4 3 2440.26 247.98
 -3 -4 -3 109.89 23
 -3 -4 -3 122.49 14
 -3 -4 -3 112.39 13.5
 3 4 3 122.99 13.8
 3 4 3 186.88 32.6
 3 4 3 138.19 15.5
 -4 -4 -3 266.97 44.2
 -4 -4 -3 381.36 33.8
 -4 -4 -3 368.56 33.1
 4 4 3 321.47 33.1
 4 4 3 318.57 33.4
 4 4 3 309.67 33.9
 -5 -4 -3 47.4 7.3
 -5 -4 -3 27.8 15.4
 -5 -4 -3 49.8 6.7
 5 4 3 41.8 7.7
 5 4 3 51.79 6.9
 -6 -4 -3 12.4 4.2
 -6 -4 -3 7.3 14.2
 6 4 3 2.1 4.1
 6 4 3 4.8 2.9
 -7 -4 -3 467.95 44.8
 7 4 3 397.76 43.5
 7 4 3 450.15 46.8
 -8 -4 -3 0 23.1
 -8 -4 -3 22.3 6.4
 8 4 3 14.8 5.1
 8 4 3 11.4 8.8
 -9 -4 -3 818.52 76.49
 -9 -4 -3 829.42 76.89
 9 4 3 740.33 75.19
 9 4 3 629.34 78.99
 8 -5 -3 683.13 61.29
 8 -5 -3 577.44 64.19
 -8 5 3 634.74 64.99
 -8 5 3 553.14 84.79
 7 -5 -3 342.77 31.2
 7 -5 -3 290.47 33.8
 7 -5 -3 287.47 33
 -7 5 3 259.07 49.4
 -7 5 3 327.07 34.6
 6 -5 -3 208.18 26.4
 6 -5 -3 269.67 25.4
 6 -5 -3 240.58 27.4
 -6 5 3 242.18 27.7
 -6 5 3 281.57 43.2
 5 -5 -3 105.09 15.2
 5 -5 -3 143.59 14.1
 5 -5 -3 107.79 14.6
 -5 5 3 132.59 26.9
 -5 5 3 153.38 16.2
 4 -5 -3 44.9 5.9
 4 -5 -3 41 6.6
 4 -5 -3 34.8 7.1
 -4 5 3 46.1 16.7
 -4 5 3 36 7.3
 3 -5 -3 38.2 7.1
 3 -5 -3 30.9 4.9
 -3 5 3 30 5.8
 -3 5 3 34.6 6.3
 -3 5 3 28.1 11.7
 2 -5 -3 2640.84 238.58
 2 -5 -3 2392.96 239.08
 -2 5 3 2614.94 239.48
 -2 5 3 2338.17 238.78
 -2 5 3 2569.64 248.08
 -2 5 3 2420.36 244.58
 1 -5 -3 608.34 61.89
 1 -5 -3 643.24 61.39
 -1 5 3 607.84 61.79
 -1 5 3 639.14 68.89
 -1 5 3 635.64 62.19
 -1 5 3 646.24 66.69
 0 -5 -3 1587.24 159.28
 0 -5 -3 1697.43 158.78
 0 5 3 1807.12 164.48
 0 5 3 1515.65 159.08
 0 5 3 1661.33 164.88
 -1 -5 -3 1229.28 119.69
 -1 -5 -3 1131.09 122.49
 -1 -5 -3 1274.87 118.79
 1 5 3 1185.88 119.09
 1 5 3 1349.07 124.09
 -2 -5 -3 210.08 26.2
 -2 -5 -3 194.48 19.4
 -2 -5 -3 187.28 19.6
 2 5 3 181.58 19.7
 2 5 3 159.28 22.1
 -3 -5 -3 1623.34 180.08
 -3 -5 -3 1842.12 171.48
 -3 -5 -3 1973.2 171.08
 3 5 3 1813.92 171.38
 3 5 3 1664.03 173.18
 -4 -5 -3 125.99 16.1
 -4 -5 -3 164.68 16
 -4 -5 -3 97.09 25.3
 4 5 3 157.78 17.3
 4 5 3 151.08 16.3
 -5 -5 -3 71.49 24.2
 -5 -5 -3 134.29 13.6
 -5 -5 -3 128.99 14.4
 5 5 3 118.19 13.9
 -6 -5 -3 179.78 19.6
 -6 -5 -3 169.78 20.6
 6 5 3 187.68 22.5
 6 5 3 194.28 20.3
 -7 -5 -3 16.7 21
 -7 -5 -3 7.1 5
 7 5 3 21.3 5.5
 7 5 3 21.8 7.9
 -8 -5 -3 441.76 41.9
 8 5 3 309.97 43.8
 8 5 3 404.66 40.7
 8 -6 -3 531.25 48.6
 8 -6 -3 453.85 51.09
 8 -6 -3 522.85 60.69
 -8 6 3 503.85 57.69
 -8 6 3 395.06 76.19
 7 -6 -3 116.99 18.3
 7 -6 -3 137.49 14.8
 7 -6 -3 112.89 16.8
 -7 6 3 124.69 18.8
 -7 6 3 128.89 38.3
 6 -6 -3 223.28 22.5
 6 -6 -3 192.28 24.5
 6 -6 -3 205.88 23.9
 -6 6 3 235.68 25.3
 -6 6 3 196.48 41.2
 5 -6 -3 205.78 27.5
 5 -6 -3 323.57 27.4
 5 -6 -3 254.67 28.6
 -5 6 3 246.38 42.7
 -5 6 3 283.97 29.1
 4 -6 -3 131.39 17.3
 4 -6 -3 189.78 17.2
 4 -6 -3 147.59 18.2
 -4 6 3 165.48 30.6
 -4 6 3 150.18 18.3
 3 -6 -3 409.96 45.2
 3 -6 -3 519.25 44.7
 -3 6 3 427.16 45.1
 -3 6 3 421.16 52.29
 -3 6 3 462.05 45.7
 2 -6 -3 3.4 3
 2 -6 -3 1.7 2.4
 -2 6 3 14.1 9.2
 -2 6 3 2.5 3.4
 -2 6 3 5.6 6.9
 -2 6 3 0.6 2.7
 1 -6 -3 2460.55 237.88
 1 -6 -3 2543.45 237.28
 -1 6 3 2356.06 237.88
 -1 6 3 2408.96 246.48
 -1 6 3 2611.14 243.38
 0 -6 -3 477.35 45.4
 0 -6 -3 437.76 46.1
 0 6 3 406.36 45.8
 0 6 3 423.76 52.09
 0 6 3 533.75 52.39
 -1 -6 -3 1975.2 178.68
 -1 -6 -3 1954.2 179.88
 1 6 3 1887.11 184.98
 1 6 3 1624.84 178.88
 -2 -6 -3 533.55 52.09
 -2 -6 -3 527.45 50.89
 -2 -6 -3 453.85 54.89
 -2 -6 -3 539.45 50.59
 2 6 3 531.05 55.69
 2 6 3 489.25 51.09
 -3 -6 -3 555.44 61.49
 -3 -6 -3 520.45 52.89
 -3 -6 -3 552.14 53.49
 3 6 3 540.35 56.89
 3 6 3 506.85 53.49
 -4 -6 -3 310.37 47.7
 -4 -6 -3 424.16 39.4
 -4 -6 -3 398.46 38.7
 4 6 3 398.66 39.3
 -5 -6 -3 6 3.3
 -5 -6 -3 9.5 3.9
 -5 -6 -3 1.2 11.3
 5 6 3 8.4 4.3
 -6 -6 -3 -0.2 13.7
 -6 -6 -3 -1.7 4
 -6 -6 -3 1.4 3.3
 6 6 3 1.9 4
 -7 -6 -3 1.8 17.5
 -7 -6 -3 12.4 5.1
 -7 -6 -3 6 5.5
 7 6 3 9.6 5.2
 -8 -6 -3 411.16 39.7
 8 6 3 315.17 37.8
 7 -7 -3 321.07 39.4
 7 -7 -3 324.87 38.1
 7 -7 -3 388.76 36.4
 -7 7 3 314.57 64.79
 -7 7 3 381.26 40.4
 6 -7 -3 45.9 11.2
 6 -7 -3 52.59 9.2
 6 -7 -3 60.89 11
 -6 7 3 49.4 11.4
 -6 7 3 57.59 28.5
 5 -7 -3 18.8 5
 5 -7 -3 19.6 6
 5 -7 -3 18.8 7.3
 -5 7 3 16.3 16.3
 -5 7 3 25.8 8
 4 -7 -3 83.89 11.9
 4 -7 -3 92.89 13
 -4 7 3 90.19 22.4
 -4 7 3 92.99 26.7
 -4 7 3 96.99 13.6
 3 -7 -3 118.59 16
 3 -7 -3 162.08 18.4
 -3 7 3 123.19 28.5
 -3 7 3 152.68 17.2
 -3 7 3 127.39 23.6
 2 -7 -3 419.36 40.2
 2 -7 -3 373.36 41.7
 -2 7 3 404.96 46.7
 -2 7 3 349.96 44.2
 -2 7 3 366.66 51.59
 1 -7 -3 13.3 5
 -1 7 3 10.9 5.3
 -1 7 3 16.3 11.2
 -1 7 3 13.5 8.7
 0 -7 -3 2108.79 193.38
 0 -7 -3 1967.4 194.38
 0 7 3 2293.07 201.18
 0 7 3 1921.41 202.58
 0 7 3 1747.43 193.88
 -1 -7 -3 11.8 3.8
 -1 -7 -3 15.2 5.6
 1 7 3 9.8 7.7
 1 7 3 1.1 3.3
 1 7 3 11.4 10.8
 -2 -7 -3 1879.61 183.38
 -2 -7 -3 1943.11 182.98
 -2 -7 -3 1946.51 184.78
 2 7 3 1945.31 190.08
 2 7 3 1792.72 183.68
 -3 -7 -3 226.28 20.5
 -3 -7 -3 163.38 20.4
 -3 -7 -3 166.68 25.9
 -3 -7 -3 174.18 21.8
 3 7 3 163.88 20.8
 3 7 3 205.38 26.3
 -4 -7 -3 451.45 61.19
 -4 -7 -3 516.35 53.19
 -4 -7 -3 558.14 53.99
 4 7 3 642.74 59.49
 4 7 3 488.55 53.99
 -5 -7 -3 6.4 4.4
 -5 -7 -3 7 12
 -5 -7 -3 5.4 3.8
 5 7 3 9.3 5.5
 -6 -7 -3 39.8 20
 -6 -7 -3 74.19 11.7
 -6 -7 -3 90.89 11
 6 7 3 69.59 12.1
 -7 -7 -3 105.99 15.2
 7 7 3 88.89 15.1
 6 -8 -3 344.37 31.9
 6 -8 -3 220.98 33.5
 6 -8 -3 272.57 32.6
 -6 8 3 351.26 35.7
 -6 8 3 286.77 49.5
 -6 8 3 331.87 61.99
 5 -8 -3 14.4 8.1
 5 -8 -3 17.3 6.8
 5 -8 -3 21.1 6.1
 -5 8 3 20.4 18.1
 -5 8 3 17.1 9.3
 -5 8 3 12.8 18.3
 4 -8 -3 -0.1 4.3
 4 -8 -3 4.2 4.6
 4 -8 -3 6.4 5.6
 -4 8 3 2.4 6.5
 -4 8 3 3.5 13.4
 -4 8 3 2.8 16.1
 3 -8 -3 4 4
 3 -8 -3 3.5 5.1
 -3 8 3 -3.1 13.8
 -3 8 3 1.5 5
 -3 8 3 6.7 10.8
 2 -8 -3 194.08 21.5
 2 -8 -3 192.88 20.2
 -2 8 3 178.68 28.1
 -2 8 3 164.58 21.4
 -2 8 3 178.78 34.7
 1 -8 -3 241.08 25.5
 1 -8 -3 239.58 26.5
 -1 8 3 238.68 38.4
 -1 8 3 219.28 26.7
 -1 8 3 250.57 32.2
 0 -8 -3 368.06 36.5
 0 -8 -3 355.66 37.7
 0 8 3 337.97 37.7
 0 8 3 354.36 47.7
 -1 -8 -3 1765.72 170.28
 -1 -8 -3 1710.13 171.18
 -1 -8 -3 1910.51 169.98
 1 8 3 1703.93 171.08
 1 8 3 1700.63 179.88
 -2 -8 -3 30.1 7.4
 -2 -8 -3 29.3 8.6
 -2 -8 -3 32.2 6.6
 2 8 3 23.8 12.5
 2 8 3 43.2 9.1
 -3 -8 -3 1279.97 112.69
 -3 -8 -3 1042.8 114.29
 -3 -8 -3 1288.17 113.39
 3 8 3 986.1 113.19
 -4 -8 -3 5.8 4.7
 -4 -8 -3 -1 3.8
 -4 -8 -3 -2.3 9
 -4 -8 -3 5.9 7.5
 4 8 3 -1.7 5.4
 4 8 3 -5.1 10.2
 -5 -8 -3 82.29 12.4
 -5 -8 -3 78.39 22.7
 5 8 3 90.89 14.4
 -6 -8 -3 5.5 7
 -6 -8 -3 5.1 5.5
 -6 -8 -3 0.7 15.9
 6 8 3 9 7.6
 4 -9 -3 9.4 6.2
 4 -9 -3 4.4 7.6
 4 -9 -3 4.2 5.7
 -4 9 3 -2.6 22.6
 -4 9 3 -0.5 16.3
 3 -9 -3 49.1 8.4
 3 -9 -3 37.4 10
 -3 9 3 42.3 21.1
 -3 9 3 50.39 17.6
 2 -9 -3 3.1 6.5
 2 -9 -3 -0.3 4.3
 -2 9 3 -0.9 6.3
 -2 9 3 4 11.2
 -2 9 3 2.1 16.6
 1 -9 -3 701.33 63.59
 1 -9 -3 585.74 64.59
 -1 9 3 650.63 81.09
 -1 9 3 592.94 65.29
 0 -9 -3 272.07 27.8
 0 -9 -3 259.77 29.6
 0 9 3 240.68 29.5
 0 9 3 248.08 41.7
 -1 -9 -3 591.64 62.79
 -1 -9 -3 639.94 61.49
 -1 -9 -3 663.23 60.89
 1 9 3 498.45 61.99
 1 9 3 622.64 74.89
 -2 -9 -3 631.34 63.19
 -2 -9 -3 592.44 64.79
 -2 -9 -3 652.63 62.59
 2 9 3 658.53 76.39
 2 9 3 573.14 63.99
 -3 -9 -3 106.69 19.3
 -3 -9 -3 123.89 15.6
 3 9 3 119.69 18.3
 3 9 3 122.09 28.1
 -4 -9 -3 370.36 34.2
 -4 -9 -3 294.97 36.6
 -4 -9 -3 273.17 36.2
 4 9 3 401.66 37
 -5 -9 -3 8.6 12.7
 5 9 3 18 9.7
 2 -10 -3 132.79 20.8
 2 -10 -3 164.78 17.6
 -2 10 3 101.29 20.9
 -2 10 3 81.89 34.6
 1 -10 -3 21.6 7
 -1 10 3 30 10.6
 -1 10 3 41.7 26.2
 0 -10 -3 812.72 80.09
 0 -10 -3 809.12 77.59
 0 10 3 780.02 96.89
 0 10 3 702.43 79.79
 -1 -10 -3 39.3 11.2
 -1 -10 -3 29.5 7.8
 -1 -10 -3 42.6 9.7
 1 10 3 30.2 10.8
 1 10 3 28.3 20.8
 -2 -10 -3 543.85 66.49
 -2 -10 -3 642.34 64.89
 2 10 3 665.53 82.09
 2 10 3 756.62 76.39
 3 9 -4 334.27 52.59
 3 9 -4 190.48 28.9
 -3 -9 4 210.38 25.6
 -3 -9 4 210.68 28
 -3 -9 4 249.88 27.1
 2 9 -4 488.55 65.09
 2 9 -4 302.17 41.2
 -2 -9 4 411.96 40.1
 -2 -9 4 300.07 40.1
 -2 -9 4 388.96 38.8
 1 9 -4 211.48 30.3
 1 9 -4 244.28 50.49
 -1 -9 4 295.47 29.2
 -1 -9 4 244.88 27.6
 -1 -9 4 258.37 29.4
 0 9 -4 647.84 70.19
 0 9 -4 590.44 86.49
 0 -9 4 684.53 66.79
 0 -9 4 694.43 66.19
 -1 9 -4 63.09 29.4
 1 -9 4 55.99 10.7
 1 -9 4 71.99 20.4
 1 -9 4 69.39 11.4
 -2 9 -4 513.15 82.29
 2 -9 4 613.24 69.89
 2 -9 4 667.03 59.29
 2 -9 4 523.25 58.49
 -3 9 -4 24.3 24.9
 3 -9 4 30.6 16.8
 3 -9 4 35.9 8.9
 3 -9 4 36.6 8.3
 -4 9 -4 67.99 38.1
 4 -9 4 71.99 26.4
 4 -9 4 70.19 13
 4 -9 4 75.69 13.8
 -5 -8 4 -0.4 5.2
 -5 -8 4 3.3 4.7
 4 8 -4 28.2 8.8
 -4 -8 4 21.9 6
 -4 -8 4 15.5 6.2
 3 8 -4 7.8 16.9
 3 8 -4 0.6 6.7
 -3 -8 4 1.3 4.4
 -3 -8 4 7.9 4.4
 2 8 -4 508.95 61.89
 2 8 -4 769.12 81.39
 -2 -8 4 590.14 61.09
 -2 -8 4 502.15 61.09
 -2 -8 4 702.03 60.79
 1 8 -4 106.39 30.5
 1 8 -4 108.19 17.3
 -1 -8 4 120.99 16
 -1 -8 4 116.59 14.9
 -1 -8 4 152.58 16.3
 0 8 -4 414.06 64.89
 0 8 -4 493.75 50.99
 0 -8 4 528.25 49.2
 0 -8 4 468.35 55.29
 0 -8 4 482.55 48.4
 -1 8 -4 779.32 105.29
 1 -8 4 833.62 88.99
 1 -8 4 962.8 88.09
 1 -8 4 974.6 97.19
 -2 8 -4 267.77 52.29
 2 -8 4 337.47 33.7
 2 -8 4 307.67 34.8
 2 -8 4 351.36 44.1
 -3 8 -4 575.14 88.09
 3 -8 4 683.13 78.09
 3 -8 4 720.23 66.99
 -4 8 -4 21.6 15.3
 -4 8 -4 12.9 11.7
 -4 8 -4 8.7 20.6
 4 -8 4 21.9 14.2
 4 -8 4 18.5 6.2
 4 -8 4 11.4 6
 -5 8 -4 -0.7 22.4
 -5 8 -4 15.1 20.9
 5 -8 4 8.3 5.3
 5 -8 4 12.3 16.4
 5 -8 4 14.9 7.2
 5 -8 4 15.1 5.9
 -6 8 -4 -4.7 31.5
 6 -8 4 4.7 7.3
 6 7 -4 120.89 16.8
 -6 -7 4 127.59 15.7
 -6 -7 4 67.89 27.4
 -6 -7 4 123.49 14.4
 5 7 -4 3.9 5.3
 -5 -7 4 0.7 3.8
 -5 -7 4 3.3 4.6
 -5 -7 4 -1.9 10.5
 4 7 -4 21.6 6.9
 -4 -7 4 19.2 5.1
 -4 -7 4 17.3 5.5
 3 7 -4 33 8.1
 3 7 -4 71.59 22.1
 -3 -7 4 48 8.2
 -3 -7 4 41.4 7.6
 2 7 -4 142.59 18.6
 2 7 -4 160.38 31.6
 -2 -7 4 172.98 17.9
 -2 -7 4 137.09 16.8
 1 7 -4 1081.19 114.99
 1 7 -4 917.61 100.59
 -1 -7 4 1025.7 104.59
 -1 -7 4 1081.09 99.49
 -1 -7 4 995.3 100.09
 0 7 -4 77.19 23.7
 0 7 -4 65.89 11.8
 0 -7 4 78.39 16.5
 0 -7 4 87.29 11.3
 0 -7 4 87.49 10.6
 -1 7 -4 1287.47 141.79
 -1 7 -4 1428.16 158.88
 1 -7 4 1489.85 148.89
 1 -7 4 1523.45 140.59
 1 -7 4 1512.75 140.59
 -2 7 -4 588.64 83.89
 2 -7 4 757.42 68.39
 2 -7 4 667.53 67.79
 2 -7 4 725.03 77.19
 -3 7 -4 629.14 86.69
 -3 7 -4 638.84 77.49
 3 -7 4 677.83 67.69
 3 -7 4 749.82 78.79
 3 -7 4 728.73 68.09
 -4 7 -4 248.18 44.4
 -4 7 -4 259.57 52.39
 4 -7 4 361.46 32.4
 4 -7 4 300.57 31.9
 4 -7 4 342.67 44.3
 -5 7 -4 9.7 20
 -5 7 -4 3.6 5.2
 -5 7 -4 25.4 21.1
 5 -7 4 11.6 5.1
 5 -7 4 4.8 11.9
 5 -7 4 12.7 5.6
 5 -7 4 19.3 5.8
 -6 7 -4 74.99 13.4
 -6 7 -4 73.49 35.9
 -6 7 -4 88.29 37.1
 6 -7 4 102.49 29.6
 6 -7 4 90.09 13
 6 -7 4 102.29 13.4
 6 -7 4 79.79 13.1
 -7 7 -4 -7.4 28.8
 -7 7 -4 0.9 7.9
 -7 7 -4 12.4 36.6
 7 -7 4 -0.3 6.4
 7 -7 4 5.7 7.8
 7 6 -4 450.55 47.1
 -7 -6 4 437.96 47.2
 -7 -6 4 477.85 45.8
 6 6 -4 -0.4 5
 -6 -6 4 1.2 4
 -6 -6 4 1.6 16.3
 -6 -6 4 -2.1 3.5
 5 6 -4 118.59 14.8
 -5 -6 4 125.89 14.6
 -5 -6 4 125.89 13.5
 -5 -6 4 73.29 25.3
 4 6 -4 23.2 5.6
 -4 -6 4 20.4 4.9
 -4 -6 4 14.3 4.4
 -4 -6 4 17.2 11.2
 3 6 -4 21.7 6.3
 3 6 -4 57.79 18.1
 -3 -6 4 29.1 5.9
 -3 -6 4 32.3 5.8
 -3 -6 4 24.2 9
 2 6 -4 355.26 38.1
 2 6 -4 453.05 51.09
 -2 -6 4 362.96 40.1
 -2 -6 4 320.77 37.1
 -2 -6 4 378.16 37.1
 1 6 -4 429.56 43.4
 1 6 -4 420.16 54.19
 -1 -6 4 408.06 46.4
 -1 -6 4 433.76 42.2
 0 6 -4 1972.3 202.38
 0 6 -4 1948.21 213.58
 0 -6 4 2178.58 201.38
 0 -6 4 2179.38 207.38
 0 -6 4 2183.18 201.68
 -1 6 -4 -1.1 8.3
 -1 6 -4 -1.4 2.9
 1 -6 4 3.7 2.4
 1 -6 4 6.7 3.3
 1 -6 4 9.2 7.1
 -2 6 -4 2063.79 227.78
 -2 6 -4 2067.19 215.28
 -2 6 -4 2284.77 214.18
 2 -6 4 2097.49 212.38
 2 -6 4 2284.37 221.28
 2 -6 4 2505.85 212.98
 -3 6 -4 63.79 19.6
 -3 6 -4 60.69 22.4
 3 -6 4 60.69 8.7
 3 -6 4 64.89 10
 3 -6 4 89.09 18.3
 -4 6 -4 448.76 68.89
 -4 6 -4 559.64 52.49
 -4 6 -4 499.85 68.09
 4 -6 4 436.46 52.19
 4 -6 4 610.54 64.59
 4 -6 4 518.95 52.09
 4 -6 4 601.94 52.69
 -5 6 -4 70.39 28.8
 -5 6 -4 52.99 27
 -5 6 -4 61.09 9.9
 5 -6 4 56.99 9.5
 5 -6 4 88.69 10.2
 5 -6 4 63.19 9.6
 5 -6 4 53.39 19.1
 -6 6 -4 6.2 48.1
 -6 6 -4 8.7 20.2
 -6 6 -4 1.4 5.2
 6 -6 4 4.2 4.6
 6 -6 4 1.8 4.3
 6 -6 4 2.6 11.3
 6 -6 4 3.7 4.8
 -7 6 -4 27.2 8.4
 -7 6 -4 23.1 35.6
 -7 6 -4 5 25.5
 7 -6 4 38.3 21.6
 7 -6 4 26.8 7.6
 7 -6 4 27.1 7.1
 7 -6 4 39.8 8.6
 -8 6 -4 67.29 38.9
 -8 6 -4 128.19 56.59
 -8 6 -4 161.78 20.6
 8 -6 4 149.79 52.59
 8 -6 4 168.58 19.1
 8 5 -4 614.24 61.29
 -8 -5 4 590.84 61.79
 -8 -5 4 636.54 63.19
 7 5 -4 212.78 24.5
 -7 -5 4 242.08 25.5
 -7 -5 4 249.38 23.6
 -7 -5 4 146.69 48
 -6 -5 4 580.84 58.19
 5 5 -4 58.69 9.2
 -5 -5 4 52.69 21.3
 -5 -5 4 63.49 9.1
 -5 -5 4 67.49 8.4
 4 5 -4 179.28 18.2
 -4 -5 4 168.98 17.2
 -4 -5 4 107.19 27.5
 -4 -5 4 174.48 17.9
 3 5 -4 15 9.6
 3 5 -4 3 2.7
 -3 -5 4 4.3 2.4
 -3 -5 4 8.9 3.4
 -3 -5 4 2 10
 2 5 -4 616.14 59.19
 -2 -5 4 611.44 58.79
 -2 -5 4 556.84 60.59
 -2 -5 4 621.94 58.39
 -2 -5 4 590.14 59.69
 1 5 -4 788.82 88.09
 1 5 -4 797.62 78.69
 -1 -5 4 757.02 81.49
 -1 -5 4 868.41 77.99
 0 5 -4 2174.18 223.38
 0 5 -4 2064.69 213.18
 0 -5 4 2253.47 212.68
 0 -5 4 2287.27 212.58
 0 -5 4 2300.27 217.88
 -1 5 -4 1813.52 190.78
 -1 5 -4 1636.24 179.58
 1 -5 4 2048.1 179.08
 1 -5 4 1866.01 185.38
 1 -5 4 1942.91 178.88
 -2 5 -4 346.97 39.8
 -2 5 -4 338.47 46
 2 -5 4 318.37 33.3
 2 -5 4 323.47 33.7
 2 -5 4 352.66 41.2
 -3 5 -4 1168.88 113.89
 -3 5 -4 1127.89 125.39
 -3 5 -4 1115.99 128.29
 3 -5 4 1338.57 114.29
 3 -5 4 1283.77 123.89
 3 -5 4 1054.39 113.49
 -4 5 -4 3.6 2.9
 -4 5 -4 5.6 12.6
 4 -5 4 3.4 3
 4 -5 4 0.4 2.6
 -5 5 -4 329.67 32.9
 -5 5 -4 335.07 55.19
 -5 5 -4 290.07 49.4
 5 -5 4 323.17 32.7
 5 -5 4 251.67 32.5
 5 -5 4 382.06 45.7
 5 -5 4 351.06 33
 -6 5 -4 43.5 8.2
 -6 5 -4 40.4 22
 -6 5 -4 39.7 26.5
 6 -5 4 32.5 14.3
 6 -5 4 49.6 7.9
 6 -5 4 28.3 7.1
 6 -5 4 41.3 7.9
 -7 5 -4 17.1 21
 -7 5 -4 39.5 8.4
 -7 5 -4 29.5 30.6
 7 -5 4 25.3 6.7
 7 -5 4 29.3 6.9
 7 -5 4 30 17.4
 7 -5 4 35.7 7.4
 -8 5 -4 107.29 16.1
 -8 5 -4 76.39 47
 -8 5 -4 76.29 54.39
 8 -5 4 79.29 14.5
 8 -5 4 110.19 14.6
 8 -5 4 146.49 53.59
 8 4 -4 578.94 58.29
 8 4 -4 492.45 65.89
 -8 -4 4 642.34 60.59
 -8 -4 4 483.65 90.39
 -8 -4 4 654.33 59.69
 7 4 -4 367.16 42.7
 7 4 -4 378.66 39.2
 -7 -4 4 426.96 40.5
 -7 -4 4 269.37 61.39
 -7 -4 4 413.96 40.9
 -7 -4 4 415.16 38.7
 6 4 -4 404.76 44.7
 6 4 -4 440.86 42.2
 -6 -4 4 475.95 43.1
 -6 -4 4 329.47 60.59
 -6 -4 4 415.26 41.5
 5 4 -4 703.93 58.99
 5 4 -4 573.44 56.09
 -5 -4 4 456.15 70.89
 -5 -4 4 558.34 55.49
 4 4 -4 209.28 20.4
 -4 -4 4 208.08 19.9
 -4 -4 4 190.28 20.4
 -4 -4 4 142.39 31.2
 3 4 -4 176.28 20.7
 -3 -4 4 217.28 20.5
 -3 -4 4 167.18 29.1
 -3 -4 4 223.88 21
 2 4 -4 27 11.3
 2 4 -4 13.6 3.4
 -2 -4 4 21.4 4.5
 -2 -4 4 13.3 4.7
 -2 -4 4 20 3.7
 -2 -4 4 14.6 7.6
 1 4 -4 2522.85 233.88
 1 4 -4 2201.28 224.68
 -1 -4 4 2399.06 227.78
 -1 -4 4 2270.17 224.18
 0 4 -4 172.68 26.7
 0 4 -4 176.98 19.3
 0 -4 4 209.18 23.7
 0 -4 4 165.58 18.6
 -1 4 -4 3366.36 325.57
 -1 4 -4 3218.18 334.17
 -1 4 -4 3491.05 325.07
 1 -4 4 3385.76 324.07
 1 -4 4 3581.74 330.77
 1 -4 4 3350.06 324.37
 -2 4 -4 445.76 56.69
 -2 4 -4 475.25 54.09
 2 -4 4 480.25 46.5
 2 -4 4 456.45 46
 2 -4 4 506.05 53.89
 -3 4 -4 505.85 65.49
 -3 4 -4 521.85 65.89
 -3 4 -4 553.24 53.79
 3 -4 4 589.34 62.69
 3 -4 4 542.35 53.69
 3 -4 4 579.14 54.19
 -4 4 -4 881.91 83.29
 -4 4 -4 764.72 98.89
 4 -4 4 925.01 93.79
 4 -4 4 772.42 82.99
 4 -4 4 947.01 83.69
 -5 4 -4 29.2 5.8
 -5 4 -4 30.8 16.1
 -5 4 -4 22.3 18.3
 5 -4 4 37.6 6.3
 5 -4 4 37.5 15.3
 5 -4 4 28.7 5.8
 -6 4 -4 186.58 20.3
 -6 4 -4 151.68 43.2
 -6 4 -4 174.88 36.3
 6 -4 4 148.59 19.5
 6 -4 4 235.78 33.5
 6 -4 4 177.18 19.6
 6 -4 4 188.28 19.9
 -7 4 -4 21.3 7.1
 -7 4 -4 23.2 15.7
 -7 4 -4 12 27.9
 7 -4 4 32.5 7.2
 7 -4 4 34.6 15.6
 7 -4 4 35.7 6.7
 -8 4 -4 45.1 27.4
 -8 4 -4 66.29 42.5
 -8 4 -4 98.09 14.4
 8 -4 4 85.99 26.4
 8 -4 4 55.49 11.9
 8 -4 4 84.09 12
 -9 4 -4 225.48 29.4
 -9 4 -4 233.88 83.69
 9 -4 4 275.37 27.6
 9 -4 4 277.77 59.59
 9 -4 4 198.68 27.9
 9 3 -4 682.03 72.09
 9 3 -4 711.43 66.99
 -9 -3 4 719.13 68.49
 -9 -3 4 432.96 126.29
 8 3 -4 0.7 7.6
 8 3 -4 3.8 3.7
 -8 -3 4 3.9 5.3
 -8 -3 4 -3.2 4.3
 -8 -3 4 -6.6 24.8
 7 3 -4 914.01 107.09
 7 3 -4 1142.39 104.49
 -7 -3 4 1192.68 106.39
 -7 -3 4 1129.69 105.59
 -7 -3 4 958.4 130.79
 6 3 -4 99.29 12.4
 6 3 -4 83.99 14.9
 -6 -3 4 120.39 12.1
 -6 -3 4 134.49 14.2
 -6 -3 4 118.69 13.8
 5 3 -4 296.87 34.8
 5 3 -4 312.67 32.9
 -5 -3 4 372.76 33.9
 -5 -3 4 335.37 32.6
 4 3 -4 14.4 4.1
 4 3 -4 10.5 2.9
 -4 -3 4 11 2.6
 -4 -3 4 20 4.1
 3 3 -4 19.1 3.5
 -3 -3 4 12 2.7
 -3 -3 4 15.7 3.5
 2 3 -4 773.52 76.39
 -2 -3 4 802.62 77.79
 -2 -3 4 812.52 76.09
 -2 -3 4 765.02 76.39
 1 3 -4 25.1 4.4
 1 3 -4 36.1 10.8
 -1 -3 4 40.7 4.3
 -1 -3 4 26.4 4.7
 -1 -3 4 22.8 6.4
 0 3 -4 4199.78 400.16
 0 3 -4 3751.02 392.16
 0 -3 4 4086.79 391.96
 0 -3 4 4419.46 396.96
 -1 3 -4 61.99 14.2
 -1 3 -4 72.09 10.7
 1 -3 4 67.29 7.4
 1 -3 4 66.89 12.5
 -2 3 -4 3752.72 399.26
 -2 3 -4 4119.19 398.96
 -2 3 -4 4212.98 389.86
 2 -3 4 3663.43 389.56
 2 -3 4 4290.37 397.66
 2 -3 4 4529.95 390.46
 -3 3 -4 358.06 33.8
 -3 3 -4 312.47 44.9
 -3 3 -4 330.47 43.6
 3 -3 4 365.16 33.8
 3 -3 4 295.47 33.3
 3 -3 4 330.37 33.1
 3 -3 4 375.36 41.9
 -4 3 -4 1717.83 193.58
 -4 3 -4 1852.61 181.68
 -4 3 -4 1843.42 199.18
 4 -3 4 2022.5 182.08
 4 -3 4 1804.12 181.58
 4 -3 4 1902.41 181.98
 4 -3 4 2134.59 192.38
 -5 3 -4 472.15 70.59
 -5 3 -4 604.34 50.89
 -5 3 -4 453.95 62.89
 5 -3 4 503.45 50.39
 5 -3 4 489.35 50.59
 -6 3 -4 6.9 17.5
 -6 3 -4 11 12.8
 -6 3 -4 27.3 5.7
 6 -3 4 19 5.2
 6 -3 4 31.7 14.4
 -7 3 -4 14.4 13.9
 -7 3 -4 10.4 23.4
 -7 3 -4 18.3 6.1
 7 -3 4 37.8 7.2
 7 -3 4 28.8 15
 -8 3 -4 -1.2 28.5
 -8 3 -4 -2.9 6.1
 -8 3 -4 -3.9 15.8
 8 -3 4 6.7 12.5
 8 -3 4 8.5 5.2
 8 -3 4 1.6 5.4
 -9 3 -4 210.08 24.7
 -9 3 -4 145.59 68.39
 -9 3 -4 155.48 45.9
 9 -3 4 208.08 24.1
 9 2 -4 354.26 48.5
 9 2 -4 486.35 44.3
 -9 -2 4 451.25 47.1
 -9 -2 4 451.05 46.2
 8 2 -4 1064.49 105.19
 8 2 -4 1071.49 101.29
 -8 -2 4 1063.69 102.89
 -8 -2 4 1116.89 103.59
 -8 -2 4 864.41 133.59
 7 2 -4 169.38 17.4
 7 2 -4 142.59 20.3
 -7 -2 4 180.68 19.5
 -7 -2 4 163.48 18.7
 6 2 -4 852.31 83.39
 6 2 -4 747.83 88.99
 -6 -2 4 924.31 85.79
 -6 -2 4 899.71 84.99
 5 2 -4 109.19 12.5
 5 2 -4 99.69 14.3
 -5 -2 4 117.19 12.3
 -5 -2 4 128.89 13.7
 -5 -2 4 146.09 14
 4 2 -4 138.69 14.5
 4 2 -4 118.19 12.7
 -4 -2 4 120.59 12.5
 -4 -2 4 117.69 13.3
 3 2 -4 1.2 1.3
 3 2 -4 0.5 1.9
 -3 -2 4 4.6 1.8
 -3 -2 4 2.2 1.3
 2 2 -4 655.93 63.79
 2 2 -4 693.43 63.29
 -2 -2 4 677.13 63.49
 -2 -2 4 570.54 63.29
 -2 -2 4 682.73 65.49
 1 2 -4 176.28 17.2
 -1 -2 4 170.08 19.9
 -1 -2 4 151.78 16.4
 -1 -2 4 161.98 16.4
 0 2 -4 262.57 29.1
 0 2 -4 342.67 36.4
 0 2 -4 261.37 29.7
 0 -2 4 325.77 30.8
 0 -2 4 311.67 33.8
 -1 2 -4 3636.84 413.36
 -1 2 -4 4579.54 411.16
 1 -2 4 4095.09 406.46
 1 -2 4 4594.04 407.16
 1 -2 4 4457.35 413.76
 -2 2 -4 129.29 12.4
 -2 2 -4 100.49 18.8
 -2 2 -4 121.69 20.8
 2 -2 4 123.49 12.4
 2 -2 4 133.79 19.2
 -3 2 -4 5502.35 486.85
 -3 2 -4 5364.56 501.45
 -3 2 -4 5178.08 497.15
 3 -2 4 4634.44 486.95
 3 -2 4 4915.61 486.75
 -4 2 -4 12.9 3.2
 -4 2 -4 25 11.4
 -4 2 -4 5.7 10.5
 4 -2 4 12.6 8.7
 4 -2 4 7.7 2.5
 4 -2 4 9.6 3.1
 -5 2 -4 1004 83.09
 -5 2 -4 829.52 103.09
 -5 2 -4 799.32 94.39
 5 -2 4 760.42 82.49
 -6 2 -4 81.39 22
 -6 2 -4 79.89 31
 -6 2 -4 116.19 12
 6 -2 4 72.99 10.7
 -7 2 -4 0.9 11.8
 -7 2 -4 4.3 18.8
 -7 2 -4 5.5 4.7
 -7 2 -4 1.2 3.9
 7 -2 4 2.3 3.9
 7 -2 4 3 8.4
 -8 2 -4 131.39 35.7
 -8 2 -4 214.48 22.6
 -8 2 -4 161.68 54.99
 -8 2 -4 201.08 22.5
 8 -2 4 150.28 21.5
 8 -2 4 249.58 34.7
 -9 2 -4 52.89 45.4
 -9 2 -4 91.69 15.1
 -9 2 -4 48.2 26.5
 9 -2 4 79.79 11.5
 9 -2 4 87.49 25.3
 9 -2 4 50.99 15.6
 9 1 -4 161.18 34
 9 1 -4 236.58 21.9
 -9 -1 4 242.78 24.8
 -9 -1 4 165.98 28.1
 -9 -1 4 250.17 26.1
 8 1 -4 934.61 109.19
 8 1 -4 1199.18 106.19
 -8 -1 4 960.4 111.59
 -8 -1 4 1249.28 108.99
 -8 -1 4 1184.78 108.09
 7 1 -4 1181.38 109.09
 7 1 -4 993.6 111.69
 -7 -1 4 1243.88 110.79
 -7 -1 4 1237.58 111.39
 -7 -1 4 1032 114.29
 6 1 -4 752.82 75.19
 6 1 -4 734.23 72.69
 -6 -1 4 782.52 74.59
 -6 -1 4 753.02 74.09
 -6 -1 4 765.52 78.29
 5 1 -4 929.01 83.69
 5 1 -4 889.31 85.59
 -5 -1 4 890.81 84.99
 -5 -1 4 798.22 86.39
 -5 -1 4 855.01 84.59
 4 1 -4 13.7 2.3
 4 1 -4 13.4 3.9
 -4 -1 4 12.9 2.1
 -4 -1 4 9.7 2.8
 -4 -1 4 15.1 3.5
 -4 -1 4 14.5 4.1
 3 1 -4 10.8 1.8
 3 1 -4 7.3 2.5
 -3 -1 4 7 2.3
 -3 -1 4 7.2 2.8
 -3 -1 4 6.3 1.9
 -3 -1 4 9.4 1.6
 2 1 -4 788.52 68.49
 2 1 -4 722.33 67.59
 -2 -1 4 617.54 67.89
 -2 -1 4 732.63 67.49
 -2 -1 4 670.73 68.19
 1 1 -4 2378.56 230.08
 -1 -1 4 2535.25 229.98
 -1 -1 4 2327.77 233.28
 0 1 -4 39.7 6.1
 0 1 -4 38.5 9
 0 -1 4 38.1 8.2
 0 -1 4 35.6 6.1
 -1 1 -4 2756.42 298.87
 -1 1 -4 3292.97 297.67
 1 -1 4 3167.48 299.37
 -2 1 -4 2007.8 193.58
 -2 1 -4 2059.69 203.68
 -3 1 -4 884.71 96.89
 -3 1 -4 879.71 83.19
 -3 1 -4 795.02 90.99
 -3 1 -4 936.21 83.39
 3 -1 4 823.82 83.29
 -4 1 -4 3545.85 297.17
 -4 1 -4 2821.32 305.57
 -4 1 -4 3199.38 296.87
 -4 1 -4 3000.8 313.97
 4 -1 4 2948.8 296.77
 -5 1 -4 65.69 25.1
 -5 1 -4 107.09 11.5
 -5 1 -4 92.49 11.1
 -5 1 -4 80.89 19
 5 -1 4 92.39 11.2
 5 -1 4 120.79 19.8
 -6 1 -4 510.85 43.7
 -6 1 -4 396.76 64.69
 -6 1 -4 388.36 53.69
 6 -1 4 403.96 43.3
 -7 1 -4 144.79 16.2
 -7 1 -4 112.09 39.3
 -7 1 -4 178.18 16.8
 -7 1 -4 104.19 25.9
 7 -1 4 112.39 15.9
 7 -1 4 139.49 24.3
 -8 1 -4 189.58 22.6
 -8 1 -4 165.08 35.5
 -8 1 -4 218.78 22.8
 -8 1 -4 148.39 51.39
 8 -1 4 171.58 22.9
 8 -1 4 216.38 31.7
 8 -1 4 216.58 21
 -9 1 -4 260.87 25.1
 -9 1 -4 200.98 23.2
 -9 1 -4 114.69 35.4
 -9 1 -4 160.08 61.49
 9 -1 4 162.48 22.7
 9 -1 4 175.88 20.3
 9 -1 4 231.58 33.9
 -10 1 -4 307.77 37.9
 10 -1 4 374.56 48.8
 10 -1 4 327.77 34.8
 9 0 -4 833.02 79.99
 -9 0 4 751.92 86.89
 -9 0 4 760.82 80.89
 8 0 -4 -1.5 5.1
 -8 0 4 5.1 4.3
 -8 0 4 0.6 4.4
 -8 0 4 4.3 9.5
 7 0 -4 1434.66 154.48
 7 0 -4 1637.74 151.88
 -7 0 4 1667.33 153.78
 -7 0 4 1499.65 160.08
 -7 0 4 1705.13 154.38
 6 0 -4 571.84 62.39
 6 0 -4 645.84 59.99
 -6 0 4 621.24 66.69
 -6 0 4 635.24 62.09
 -6 0 4 639.34 61.69
 5 0 -4 1099.49 108.29
 5 0 -4 1098.99 106.19
 -5 0 4 1123.89 107.99
 -5 0 4 1112.99 107.59
 -5 0 4 1131.79 111.39
 4 0 -4 451.55 42.5
 4 0 -4 424.86 44.1
 -4 0 4 450.95 44
 -4 0 4 441.76 43.7
 3 0 -4 4.2 1.9
 3 0 -4 5.3 1
 -3 0 4 9.6 2.9
 -3 0 4 2.6 1.7
 -3 0 4 7.9 3.3
 2 0 -4 27.4 4.1
 2 0 -4 26.4 3.7
 -2 0 4 29.9 3.6
 1 0 -4 10.9 2
 1 0 -4 8.5 1.5
 -1 0 4 10 1.5
 -1 0 4 11.5 1.9
 0 0 -4 5081.39 483.45
 0 0 4 5023.3 483.35
 -1 0 -4 870.21 86.79
 -1 0 -4 865.41 80.89
 1 0 4 812.22 80.89
 -2 0 -4 3540.95 320.17
 -2 0 -4 3786.92 331.47
 -2 0 -4 3164.88 326.27
 2 0 4 2992.4 320.07
 -3 0 -4 1703.43 198.98
 -3 0 -4 2161.68 193.18
 -3 0 -4 2139.89 207.68
 3 0 4 2081.99 193.18
 -4 0 -4 970 85.69
 -4 0 -4 901.81 102.59
 -4 0 -4 768.62 92.29
 -4 0 -4 946.21 85.39
 4 0 4 825.62 85.59
 -5 0 -4 701.53 82.89
 -5 0 -4 832.62 74.89
 -5 0 -4 823.52 75.09
 -5 0 -4 752.92 94.49
 5 0 4 713.93 75.09
 -6 0 -4 310.17 27.6
 -6 0 -4 218.28 35.1
 -6 0 -4 290.17 27.5
 -6 0 -4 238.58 47
 6 0 4 223.08 27.5
 6 0 4 266.97 26.3
 -7 0 -4 186.28 19.4
 -7 0 -4 138.29 42.3
 -7 0 -4 191.58 19.3
 -7 0 -4 119.59 26.9
 7 0 4 169.28 17.8
 7 0 4 214.38 27.1
 7 0 4 138.29 19.3
 -8 0 -4 8 5.2
 -8 0 -4 6.1 4.7
 -8 0 -4 8.4 24.1
 -8 0 -4 -2.6 9.8
 8 0 4 7.2 3.4
 8 0 4 2 4.4
 8 0 4 2.7 7.9
 -9 0 -4 313.57 79.69
 -9 0 -4 410.76 45.7
 -9 0 -4 483.85 45.9
 9 0 4 430.06 44.2
 9 0 4 529.75 54.59
 9 0 4 375.26 46.4
 -10 0 -4 49.2 14.4
 -10 0 -4 48.5 22.6
 10 0 4 55.09 17.7
 10 0 4 50.89 9.2
 10 0 4 105.19 26.2
 9 -1 -4 210.88 25.7
 -9 1 4 159.48 36
 -9 1 4 270.17 33.1
 -9 1 4 232.08 27
 8 -1 -4 809.02 93.49
 -8 1 4 1008.6 93.09
 -8 1 4 1049.49 93.89
 -8 1 4 919.01 103.29
 7 -1 -4 111.69 10.9
 7 -1 -4 92.49 13.9
 -7 1 4 124.49 14.4
 -7 1 4 103.09 13.2
 -7 1 4 98.89 20.1
 6 -1 -4 2107.99 199.98
 6 -1 -4 1936.81 202.28
 -6 1 4 2111.29 201.78
 -6 1 4 2250.87 202.48
 -6 1 4 2095.49 208.78
 5 -1 -4 197.58 22.6
 5 -1 -4 196.58 22
 5 -1 -4 207.28 20.1
 -5 1 4 196.18 26.5
 -5 1 4 217.78 22.3
 -5 1 4 231.88 21.9
 4 -1 -4 721.73 76.59
 -4 1 4 859.61 76.69
 -4 1 4 769.42 80.59
 -4 1 4 808.72 76.99
 3 -1 -4 46.7 6.1
 3 -1 -4 39.9 6.5
 -3 1 4 56.99 6.7
 -3 1 4 50.49 8.9
 -3 1 4 57.69 6.2
 2 -1 -4 495.75 52.99
 -2 1 4 583.44 53.09
 -2 1 4 576.14 53.59
 1 -1 -4 1679.93 149.09
 1 -1 -4 1493.45 149.79
 1 -1 -4 1557.24 149.29
 -1 1 4 1532.75 149.69
 -1 1 4 1618.44 149.19
 -1 1 4 1512.25 149.29
 0 -1 -4 356.46 37.1
 0 -1 -4 342.37 33.4
 0 -1 -4 349.17 33.7
 0 1 4 334.87 33.5
 0 1 4 359.96 33.7
 -1 -1 -4 6090.89 640.24
 1 1 4 7276.27 641.24
 -2 -1 -4 18.4 2.4
 2 1 4 9.9 2.2
 2 1 4 16.1 6.7
 2 1 4 13.1 2.5
 2 1 4 16.1 10.7
 -3 -1 -4 3459.75 319.17
 -3 -1 -4 3110.89 331.87
 -3 -1 -4 3217.88 324.17
 3 1 4 3624.74 318.87
 3 1 4 3285.77 319.27
 -4 -1 -4 80.29 7.9
 -4 -1 -4 49.5 11.8
 -4 -1 -4 48.7 18.2
 4 1 4 57.19 7.9
 4 1 4 61.79 7.1
 -5 -1 -4 866.91 112.29
 -5 -1 -4 1060.59 94.99
 5 1 4 926.31 95.39
 5 1 4 1018.1 94.29
 -6 -1 -4 262.77 38.8
 -6 -1 -4 254.77 51.79
 -6 -1 -4 357.26 33.1
 -6 -1 -4 355.76 33.2
 6 1 4 306.67 33.7
 6 1 4 356.96 32.3
 -7 -1 -4 1.1 7.6
 -7 -1 -4 7.1 3.9
 -7 -1 -4 1.4 19
 -7 -1 -4 6.1 4
 7 1 4 18.4 8.7
 7 1 4 6.5 2.9
 7 1 4 3 3.6
 -8 -1 -4 78.59 36.6
 -8 -1 -4 84.69 11.6
 -8 -1 -4 55.79 19.9
 -8 -1 -4 83.19 12.4
 8 1 4 66.39 13.7
 8 1 4 92.99 16.8
 8 1 4 83.39 10.3
 -9 -1 -4 -0.1 12.2
 -9 -1 -4 1.5 6.3
 -9 -1 -4 -0.6 4.4
 -9 -1 -4 13.8 31.8
 9 1 4 2.7 9
 9 1 4 5 4.1
 9 1 4 4.6 6.7
 -10 -1 -4 336.77 38
 10 1 4 345.87 35.6
 9 -2 -4 121.99 24.4
 -9 2 4 106.09 32
 -9 2 4 123.69 16.6
 8 -2 -4 576.54 59.19
 -8 2 4 597.44 58.09
 -8 2 4 626.24 59.19
 -8 2 4 475.25 77.49
 7 -2 -4 1033.9 116.59
 7 -2 -4 1358.96 114.29
 7 -2 -4 1151.58 113.99
 -7 2 4 1267.77 116.49
 -7 2 4 1244.38 117.19
 -7 2 4 1077.79 125.69
 6 -2 -4 71.99 10.7
 6 -2 -4 96.29 8.9
 6 -2 -4 73.09 11.6
 6 -2 -4 82.29 8.6
 -6 2 4 69.29 16.8
 -6 2 4 96.49 11.1
 -6 2 4 85.39 11.6
 5 -2 -4 2325.37 249.08
 5 -2 -4 2785.32 246.98
 5 -2 -4 2333.87 248.38
 -5 2 4 2426.76 255.07
 -5 2 4 2912.91 248.68
 -5 2 4 2758.62 249.28
 4 -2 -4 3.1 1.1
 4 -2 -4 -0.4 2.2
 4 -2 -4 1.4 1.4
 -4 2 4 -1.1 2.9
 -4 2 4 4.6 2.1
 -4 2 4 0.4 1.6
 3 -2 -4 466.55 50.39
 3 -2 -4 580.64 49.2
 3 -2 -4 455.95 49.7
 -3 2 4 517.85 54.79
 -3 2 4 519.95 50.49
 -3 2 4 513.75 49.9
 2 -2 -4 504.75 48.7
 2 -2 -4 487.45 49.7
 -2 2 4 498.25 49.6
 -2 2 4 520.85 48.8
 -2 2 4 524.25 53.49
 1 -2 -4 607.84 55.99
 -1 2 4 569.54 56.09
 -1 2 4 636.94 57.19
 -1 2 4 529.75 59.89
 0 -2 -4 1524.55 144.99
 0 -2 -4 1483.25 148.99
 0 -2 -4 1482.05 145.39
 0 2 4 1571.74 145.49
 0 2 4 1556.24 149.19
 0 2 4 1502.95 145.09
 -1 -2 -4 3016.9 280.17
 -1 -2 -4 2951.3 285.77
 -1 -2 -4 2842.02 280.07
 1 2 4 2745.63 280.47
 1 2 4 3155.18 286.27
 -2 -2 -4 5637.04 486.55
 -2 -2 -4 4993.8 476.25
 -2 -2 -4 5124.59 475.95
 2 2 4 4575.74 475.95
 2 2 4 4713.13 476.15
 -3 -2 -4 1195.98 105.39
 -3 -2 -4 1050.89 104.79
 -3 -2 -4 1040.2 117.59
 3 2 4 1051.99 105.29
 3 2 4 1114.19 104.89
 -4 -2 -4 1386.66 171.48
 -4 -2 -4 1771.72 157.68
 4 2 4 1577.94 157.88
 4 2 4 1774.82 157.18
 -5 -2 -4 -2.9 9.9
 -5 -2 -4 2.8 2.3
 5 2 4 1.4 1.6
 5 2 4 5.1 5.5
 5 2 4 1.9 3.1
 -6 -2 -4 273.17 53.89
 -6 -2 -4 402.26 36.8
 6 2 4 342.37 37.5
 6 2 4 376.66 35.8
 -7 -2 -4 30 22.7
 -7 -2 -4 61.69 9
 -7 -2 -4 57.99 9.3
 7 2 4 57.79 7.9
 7 2 4 57.19 10.7
 7 2 4 65.19 12.2
 -8 -2 -4 -1.1 4.5
 -8 -2 -4 -2.5 23.4
 -8 -2 -4 3 4.3
 8 2 4 9.4 3.7
 8 2 4 -0.6 5.2
 8 2 4 6.9 6.4
 -9 -2 -4 24.2 31.5
 -9 -2 -4 38.1 8.6
 -9 -2 -4 35.2 11.8
 9 2 4 33.4 11
 9 2 4 39 7.4
 9 -3 -4 460.55 50.39
 -9 3 4 444.66 65.99
 -9 3 4 501.25 50.09
 8 -3 -4 168.48 16.9
 8 -3 -4 158.88 16.9
 8 -3 -4 191.48 20.6
 -8 3 4 114.89 31.5
 -8 3 4 149.79 20.3
 7 -3 -4 976.4 103.09
 7 -3 -4 1080.39 103.99
 -7 3 4 1229.98 104.09
 -7 3 4 936.51 114.19
 6 -3 -4 489.15 52.79
 6 -3 -4 470.15 50.19
 -6 3 4 500.95 60.69
 -6 3 4 550.64 51.49
 5 -3 -4 978.7 85.49
 5 -3 -4 831.42 87.29
 5 -3 -4 846.42 86.59
 -5 3 4 809.82 94.79
 -5 3 4 960.7 87.49
 4 -3 -4 705.23 78.79
 4 -3 -4 916.41 78.19
 4 -3 -4 749.73 79.49
 -4 3 4 848.92 79.79
 -4 3 4 837.22 86.89
 3 -3 -4 133.19 14.9
 3 -3 -4 151.18 13.7
 3 -3 -4 130.79 14.2
 -3 3 4 113.69 19.2
 -3 3 4 138.09 14.9
 2 -3 -4 3.5 1.5
 2 -3 -4 18.6 3.8
 2 -3 -4 8.8 2.1
 -2 3 4 1 3.2
 -2 3 4 3.3 2
 1 -3 -4 29.4 4.2
 -1 3 4 19.6 7.9
 -1 3 4 26.9 7.1
 -1 3 4 24.1 3.6
 -1 3 4 31.7 4.3
 0 -3 -4 2354.06 216.48
 0 -3 -4 2092.19 220.38
 0 -3 -4 2226.78 216.88
 0 3 4 2289.77 216.98
 0 3 4 2337.07 221.28
 0 3 4 2313.07 216.58
 -1 -3 -4 416.16 43.5
 -1 -3 -4 464.75 43.2
 -1 -3 -4 427.06 43
 -1 -3 -4 451.55 48.6
 1 3 4 483.55 49.6
 1 3 4 415.76 43.1
 -2 -3 -4 4425.36 415.96
 -2 -3 -4 4155.98 406.66
 -2 -3 -4 4637.94 406.96
 2 3 4 3868.51 406.66
 -3 -3 -4 2560.84 267.27
 -3 -3 -4 2847.92 255.27
 -3 -3 -4 2737.83 255.67
 3 3 4 2664.33 255.77
 3 3 4 2545.25 255.27
 -4 -3 -4 1229.18 113.59
 -4 -3 -4 1214.28 112.99
 4 3 4 1144.39 113.89
 4 3 4 1107.89 112.99
 5 3 4 1590.64 153.28
 5 3 4 1572.54 151.88
 -6 -3 -4 27.2 18.6
 -6 -3 -4 48.6 9.1
 6 3 4 66.79 10.6
 6 3 4 64.19 7.9
 6 3 4 49.7 12.2
 -7 -3 -4 275.57 29.4
 7 3 4 236.78 28.3
 7 3 4 318.97 29.7
 7 3 4 225.68 30.5
 -8 -3 -4 -5.1 23
 -8 -3 -4 4.8 4.2
 -8 -3 -4 1.2 5.1
 8 3 4 2.4 3.7
 8 3 4 9 6.8
 -9 -3 -4 31.8 8.2
 -9 -3 -4 20.9 12.8
 -9 -3 -4 0.4 32.4
 9 3 4 34.4 11.8
 9 3 4 27.3 6.6
 9 -4 -4 22.7 9.8
 -9 4 4 26.4 10.6
 -9 4 4 7.1 22.8
 8 -4 -4 1038.8 103.89
 8 -4 -4 928.31 102.79
 8 -4 -4 1129.59 99.99
 -8 4 4 1111.49 103.79
 -8 4 4 949.51 119.49
 7 -4 -4 6 4.4
 7 -4 -4 3.1 2.5
 7 -4 -4 -2.6 5.4
 -7 4 4 5 5.3
 -7 4 4 3.2 11.3
 6 -4 -4 1762.92 178.88
 6 -4 -4 1721.63 179.58
 6 -4 -4 1919.11 177.38
 -6 4 4 2078.19 179.98
 -6 4 4 1789.72 191.68
 5 -4 -4 15.5 5.1
 5 -4 -4 19.3 3.5
 5 -4 -4 23.8 5.4
 -5 4 4 10.1 9
 -5 4 4 21.3 5.4
 4 -4 -4 946.01 99.89
 4 -4 -4 1150.98 99.29
 4 -4 -4 974 100.59
 -4 4 4 1067.69 100.69
 -4 4 4 1008.1 109.39
 3 -4 -4 209.68 22.2
 3 -4 -4 202.58 22.8
 3 -4 -4 230.38 21.8
 -3 4 4 220.68 29.8
 -3 4 4 203.38 21.9
 -3 4 4 236.08 23
 2 -4 -4 69.29 7.6
 2 -4 -4 58.89 8.3
 -2 4 4 68.49 8.6
 -2 4 4 68.99 7.8
 -2 4 4 63.19 13.4
 1 -4 -4 41.9 5.4
 1 -4 -4 27.6 4.3
 -1 4 4 28.1 4.6
 -1 4 4 43.7 9.6
 -1 4 4 27.8 8.3
 -1 4 4 31.9 5.3
 0 -4 -4 960 97.19
 0 -4 -4 1039 96.79
 0 4 4 983.9 101.89
 0 4 4 968.3 96.99
 0 4 4 1075.79 102.09
 -1 -4 -4 1707.73 167.58
 -1 -4 -4 1638.64 166.78
 -1 -4 -4 1720.43 172.88
 -1 -4 -4 1545.75 166.88
 1 4 4 1837.12 171.18
 1 4 4 1743.93 167.08
 1 4 4 2033.2 175.28
 -2 -4 -4 383.46 39.9
 -2 -4 -4 446.96 48.7
 -2 -4 -4 417.96 40.2
 2 4 4 382.46 40.1
 -3 -4 -4 3774.52 346.57
 -3 -4 -4 3493.75 357.66
 -3 -4 -4 3791.82 346.97
 3 4 4 3459.05 346.67
 -4 -4 -4 870.01 78.89
 -4 -4 -4 651.33 90.29
 -4 -4 -4 952.9 79.59
 4 4 4 769.42 79.59
 4 4 4 793.22 78.89
 5 4 4 1001.3 93.59
 5 4 4 919.81 94.79
 -6 -4 -4 515.85 45.5
 6 4 4 416.16 46
 6 4 4 404.56 44.1
 -7 -4 -4 403.16 38.7
 7 4 4 369.16 37.6
 7 4 4 326.47 39.9
 -8 -4 -4 2.7 4.3
 -8 -4 -4 -10 22.1
 8 4 4 3.2 4
 8 4 4 1.4 6.7
 -9 -4 -4 1.9 41.6
 -9 -4 -4 5.2 5.9
 -9 -4 -4 0.2 7.4
 9 4 4 1 10.2
 9 4 4 2.2 5.4
 8 -5 -4 186.08 25.9
 8 -5 -4 219.78 28.4
 -8 5 4 226.58 26.8
 -8 5 4 182.78 44.8
 7 -5 -4 1197.38 120.79
 7 -5 -4 1140.09 119.79
 7 -5 -4 1249.88 117.79
 -7 5 4 1399.26 121.29
 -7 5 4 1135.39 137.29
 6 -5 -4 318.67 30.6
 6 -5 -4 294.27 32.9
 6 -5 -4 293.07 32.1
 -6 5 4 357.86 33.8
 -6 5 4 256.37 44.8
 5 -5 -4 1382.86 151.18
 5 -5 -4 1680.63 149.59
 -5 5 4 1372.36 162.58
 -5 5 4 1867.11 155.68
 4 -5 -4 24.6 4.5
 4 -5 -4 19.9 6
 4 -5 -4 32 5.6
 -4 5 4 34.7 7
 -4 5 4 29.6 14.2
 3 -5 -4 644.84 59.39
 3 -5 -4 630.94 58.69
 3 -5 -4 558.84 59.69
 -3 5 4 657.43 60.09
 -3 5 4 552.94 58.99
 -3 5 4 570.84 68.49
 2 -5 -4 258.57 24.8
 2 -5 -4 245.08 25.6
 -2 5 4 250.87 31.7
 -2 5 4 223.98 32.3
 -2 5 4 236.28 25.1
 -2 5 4 251.87 25.9
 1 -5 -4 161.28 19.1
 1 -5 -4 198.68 18.7
 -1 5 4 181.68 19.1
 -1 5 4 184.08 25.6
 -1 5 4 186.68 19.7
 -1 5 4 168.78 23.7
 0 -5 -4 103.29 12.1
 0 -5 -4 102.19 11.3
 0 5 4 91.59 11.6
 0 5 4 100.59 16.7
 0 5 4 112.39 17.1
 -1 -5 -4 306.67 31.3
 -1 -5 -4 310.67 30.3
 -1 -5 -4 280.27 34.8
 1 5 4 353.36 39.3
 1 5 4 300.57 35
 1 5 4 271.27 30.5
 -2 -5 -4 1562.94 156.08
 -2 -5 -4 1558.54 148.49
 -2 -5 -4 1589.44 148.79
 2 5 4 1539.95 152.28
 2 5 4 1471.95 148.79
 -3 -5 -4 91.29 10.4
 -3 -5 -4 81.29 9.8
 -3 -5 -4 67.59 17.8
 3 5 4 81.29 12.3
 3 5 4 145.29 30
 3 5 4 70.79 10
 -4 -5 -4 2697.33 238.28
 -4 -5 -4 2747.12 238.88
 4 5 4 2218.18 238.28
 4 5 4 2313.57 239.48
 -5 -5 -4 11.7 13.8
 -5 -5 -4 34.4 6.2
 -5 -5 -4 34 6.2
 5 5 4 20.5 6
 5 5 4 18.2 5.8
 -6 -5 -4 1500.05 131.39
 -6 -5 -4 1471.55 130.29
 6 5 4 1210.38 130.19
 6 5 4 1196.48 131.79
 -7 -5 -4 10.4 18.5
 -7 -5 -4 37.7 8
 7 5 4 41.2 7.5
 7 5 4 26.4 8.4
 -8 -5 -4 24.6 26
 -8 -5 -4 38 7.9
 8 5 4 26.8 7.1
 8 5 4 32.6 12
 8 -6 -4 68.69 14.1
 8 -6 -4 61.39 12.3
 -8 6 4 38.1 30.1
 -8 6 4 50.99 13.7
 7 -6 -4 653.23 56.79
 7 -6 -4 508.85 59.29
 7 -6 -4 514.85 58.49
 -7 6 4 521.65 79.29
 -7 6 4 642.94 60.39
 6 -6 -4 712.73 78.59
 6 -6 -4 788.52 78.19
 6 -6 -4 862.71 76.69
 -6 6 4 845.92 79.29
 -6 6 4 686.13 94.79
 5 -6 -4 265.87 25.5
 5 -6 -4 250.87 27.5
 5 -6 -4 228.48 26.4
 -5 6 4 285.67 28
 -5 6 4 196.88 39.4
 4 -6 -4 962.4 86.99
 4 -6 -4 881.61 90.49
 4 -6 -4 844.82 87.59
 -4 6 4 885.21 101.69
 3 -6 -4 40.2 7.7
 3 -6 -4 55.19 7
 -3 6 4 44.1 14.5
 -3 6 4 58.79 22.6
 -3 6 4 53.99 8.9
 -3 6 4 35 7.1
 2 -6 -4 150.98 15.6
 2 -6 -4 126.59 16.2
 -2 6 4 125.89 24
 -2 6 4 138.49 16
 -2 6 4 147.49 16.9
 -2 6 4 163.08 23.5
 1 -6 -4 3.1 2.4
 1 -6 -4 -0.5 2.7
 -1 6 4 -0.3 2.5
 -1 6 4 5.1 6.9
 -1 6 4 2.8 5.3
 0 -6 -4 457.55 42.5
 0 -6 -4 395.56 43.2
 0 6 4 447.06 49.5
 0 6 4 412.06 43
 0 6 4 416.16 49.7
 -1 -6 -4 335.47 41
 -1 -6 -4 410.66 37.3
 -1 -6 -4 371.06 38.3
 1 6 4 372.36 37.8
 1 6 4 374.56 43.2
 -2 -6 -4 986.7 117.89
 -2 -6 -4 1181.28 112.69
 -2 -6 -4 1192.38 114.29
 -2 -6 -4 1294.17 113.29
 2 6 4 1194.98 117.89
 -3 -6 -4 1508.65 135.69
 -3 -6 -4 1301.97 143.99
 -3 -6 -4 1369.66 135.79
 3 6 4 1389.86 139.29
 3 6 4 1458.55 136.69
 -4 -6 -4 274.77 25.7
 -4 -6 -4 183.38 34.3
 -4 -6 -4 258.07 24.9
 4 6 4 229.48 25.3
 4 6 4 232.18 27.3
 -5 -6 -4 1459.15 135.69
 -5 -6 -4 1396.16 134.89
 5 6 4 1329.67 135.29
 -6 -6 -4 9.3 16.3
 -6 -6 -4 13.3 5.6
 -6 -6 -4 10.6 4.5
 6 6 4 13.8 5.4
 -7 -6 -4 298.37 32
 7 6 4 281.17 31.2
 -8 -6 -4 2.3 24.8
 -8 -6 -4 1.1 6.5
 8 6 4 -2.7 6.1
 7 -7 -4 19.3 11.1
 7 -7 -4 13.5 5.7
 7 -7 -4 13.2 7.1
 -7 7 4 3.1 16.5
 -7 7 4 5.7 23.5
 6 -7 -4 589.04 65.59
 6 -7 -4 548.95 64.49
 6 -7 -4 734.63 64.69
 -6 7 4 639.44 88.99
 -6 7 4 723.23 66.59
 5 -7 -4 475.15 47.2
 5 -7 -4 403.46 44.4
 5 -7 -4 409.96 45.3
 -5 7 4 488.45 46.1
 -5 7 4 412.16 62.79
 4 -7 -4 237.88 30.7
 4 -7 -4 284.67 32.1
 4 -7 -4 346.17 30.9
 -4 7 4 313.27 32.6
 -4 7 4 312.57 42.8
 -4 7 4 311.97 48.1
 3 -7 -4 641.34 63.89
 3 -7 -4 633.34 62.59
 -3 7 4 686.43 73.19
 -3 7 4 669.73 78.59
 -3 7 4 536.75 63.19
 -3 7 4 668.03 64.39
 2 -7 -4 165.38 17.5
 2 -7 -4 146.09 18.3
 -2 7 4 118.79 17.9
 -2 7 4 168.38 29.5
 -2 7 4 197.48 26.7
 1 -7 -4 21.9 5.6
 1 -7 -4 22.7 10.5
 -1 7 4 13 8.9
 -1 7 4 15.7 10.1
 -1 7 4 24.5 7.6
 0 -7 -4 53.99 8.3
 0 7 4 50.69 15
 0 7 4 67.69 16.7
 0 7 4 60.39 9.3
 -1 -7 -4 603.74 61.09
 -1 -7 -4 609.94 60.19
 -1 -7 -4 656.43 59.79
 1 7 4 576.34 60.49
 1 7 4 573.14 67.09
 -2 -7 -4 9.6 5.4
 -2 -7 -4 5.1 3.6
 -2 -7 -4 12.4 4.1
 -2 -7 -4 13 7.6
 2 7 4 8.1 7.1
 2 7 4 10.9 13.4
 2 7 4 12.3 4.8
 -3 -7 -4 1412.46 124.99
 -3 -7 -4 1142.39 131.09
 -3 -7 -4 1185.28 126.39
 -3 -7 -4 1502.75 125.69
 3 7 4 1265.87 130.19
 3 7 4 1233.68 125.59
 -4 -7 -4 428.36 44
 -4 -7 -4 346.77 52.29
 -4 -7 -4 460.75 43.7
 4 7 4 432.96 44.5
 4 7 4 474.35 48.5
 -5 -7 -4 390.16 58.09
 -5 -7 -4 559.64 48.1
 -5 -7 -4 482.75 46.8
 5 7 4 421.56 47.4
 -6 -7 -4 324.17 34.3
 -6 -7 -4 360.76 35.5
 6 7 4 302.47 35.3
 -7 -7 -4 3.1 18.8
 -7 -7 -4 22.6 8.5
 -7 -7 -4 13.8 7.7
 7 7 4 11 8.1
 6 -8 -4 7.3 9.1
 6 -8 -4 0.3 6
 6 -8 -4 13.8 5.4
 -6 8 4 12.5 26.2
 -6 8 4 9.7 20.3
 5 -8 -4 1060.69 95.69
 5 -8 -4 906.71 97.39
 5 -8 -4 854.51 96.29
 -5 8 4 902.61 118.99
 -5 8 4 1033.2 111.49
 -5 8 4 1122.09 98.59
 4 -8 -4 211.68 27.8
 4 -8 -4 213.78 29.1
 4 -8 -4 289.37 27.8
 -4 8 4 291.67 41.9
 -4 8 4 322.77 30.7
 -4 8 4 263.87 48.5
 3 -8 -4 463.35 40.8
 3 -8 -4 332.77 41.4
 -3 8 4 340.27 41.5
 -3 8 4 445.16 52.29
 -3 8 4 409.36 58.99
 2 -8 -4 209.78 20.9
 2 -8 -4 207.28 22.1
 -2 8 4 193.88 30.1
 -2 8 4 171.58 34.4
 -2 8 4 145.39 21.6
 1 -8 -4 66.89 11.9
 1 -8 -4 75.59 10.6
 -1 8 4 72.99 21.9
 -1 8 4 84.99 19.5
 -1 8 4 84.19 12.3
 0 -8 -4 14.9 4.1
 0 -8 -4 25.6 7.4
 0 8 4 6.9 10
 0 8 4 12.4 5.2
 0 8 4 22.1 12.3
 -1 -8 -4 116.19 15.5
 -1 -8 -4 92.59 13.5
 -1 -8 -4 100.49 13
 1 8 4 167.48 33
 1 8 4 90.19 14.3
 1 8 4 102.49 22.4
 -2 -8 -4 1085.79 111.29
 -2 -8 -4 1185.68 110.19
 -2 -8 -4 1176.08 109.49
 2 8 4 1052.29 110.49
 2 8 4 1109.29 118.09
 -3 -8 -4 25 6.2
 -3 -8 -4 10.6 5.2
 -3 -8 -4 20 9.3
 -3 -8 -4 15.3 7.5
 3 8 4 18.9 10.9
 3 8 4 26.6 6.6
 -4 -8 -4 1367.16 116.49
 -4 -8 -4 1016.5 122.39
 -4 -8 -4 1268.47 116.89
 4 8 4 1149.48 117.19
 -5 -8 -4 56.99 11.1
 -5 -8 -4 102.59 14.3
 -5 -8 -4 58.49 22.8
 5 8 4 49.4 10.9
 -6 -8 -4 298.27 29.4
 -6 -8 -4 270.87 30.4
 -6 -8 -4 207.28 48.1
 6 8 4 280.57 31.3
 4 -9 -4 679.63 70.09
 4 -9 -4 732.83 68.09
 4 -9 -4 600.14 68.49
 -4 9 4 681.73 94.39
 -4 9 4 725.33 82.49
 3 -9 -4 6.2 7.6
 3 -9 -4 2.6 4.9
 -3 9 4 12.6 20.2
 -3 9 4 10.1 7.8
 -3 9 4 7 14.1
 2 -9 -4 134.09 19
 2 -9 -4 148.09 17.2
 -2 9 4 140.49 28.1
 -2 9 4 143.39 36.1
 -2 9 4 137.69 19.5
 1 -9 -4 10.5 6.7
 1 -9 -4 18.2 5.6
 -1 9 4 7.2 12.3
 -1 9 4 24.6 8.7
 -1 9 4 11.9 15.5
 0 -9 -4 70.89 13.3
 0 -9 -4 48.5 9.5
 0 9 4 50.39 11.5
 0 9 4 47.6 20.6
 0 9 4 61.59 20.7
 -1 -9 -4 93.89 13.4
 -1 -9 -4 77.99 15.9
 -1 -9 -4 103.29 13
 1 9 4 102.19 26.1
 1 9 4 77.29 14.8
 -2 -9 -4 296.27 32.7
 -2 -9 -4 287.77 30.1
 -2 -9 -4 268.97 29.2
 2 9 4 238.48 30.7
 -3 -9 -4 735.93 72.99
 -3 -9 -4 787.72 72.39
 -3 -9 -4 614.94 75.79
 3 9 4 804.32 84.19
 3 9 4 638.14 74.29
 -4 -9 -4 82.89 12.9
 -4 -9 -4 62.79 14.7
 -4 -9 -4 54.69 16.6
 -4 -9 -4 81.89 12.2
 4 9 4 62.59 12.2
 4 9 4 94.79 26.2
 -5 -9 -4 550.34 63.79
 2 -10 -4 3.3 9.1
 2 -10 -4 3.2 5.8
 -2 10 4 -2.5 21.1
 -2 10 4 0.9 16
 -2 10 4 -0.7 9.2
 1 -10 -4 37.6 11.5
 1 -10 -4 46.7 8.8
 -1 10 4 37 24.6
 -1 10 4 30 11.4
 0 -10 -4 21.3 9.9
 0 -10 -4 12.4 6.5
 0 10 4 36.9 20.8
 0 10 4 40.5 12.1
 -1 -10 -4 181.78 20.4
 -1 -10 -4 171.68 24.1
 -1 -10 -4 156.48 20.9
 1 10 4 171.78 37.8
 1 10 4 146.69 23.4
 -2 -10 -4 13.2 7.1
 -2 -10 -4 12.6 11.4
 2 10 4 14.3 18.1
 2 10 4 31.1 13.9
 3 9 -5 91.59 32.6
 3 9 -5 35.8 11.5
 -3 -9 5 42.5 8.9
 -3 -9 5 29.8 11.6
 2 9 -5 -3.4 7.8
 2 9 -5 0.9 23.1
 -2 -9 5 -1.5 4.7
 -2 -9 5 4.6 5.8
 -2 -9 5 0.5 7.7
 1 9 -5 22.8 9.7
 1 9 -5 13.9 22.7
 -1 -9 5 52.59 8.7
 -1 -9 5 24.3 7.5
 -1 -9 5 28.6 8.9
 0 9 -5 56.99 13.3
 0 9 -5 35.4 25.7
 0 -9 5 70.69 10.9
 0 -9 5 51.99 9.9
 -1 9 -5 236.18 51.99
 1 -9 5 270.07 28.9
 1 -9 5 278.87 29.1
 1 -9 5 255.47 38.2
 -2 9 -5 14.3 24.2
 2 -9 5 30.8 7.9
 2 -9 5 13.5 12.9
 2 -9 5 31.8 7.7
 -3 9 -5 720.63 108.49
 3 -9 5 868.41 80.79
 3 -9 5 835.12 93.29
 3 -9 5 788.72 80.29
 -4 9 -5 31.2 34.6
 4 -9 5 61.99 11.3
 4 -9 5 65.19 12.3
 5 8 -5 529.95 57.89
 -5 -8 5 554.04 54.79
 4 8 -5 7 7.3
 -4 -8 5 4.1 4.6
 -4 -8 5 7.4 5.1
 3 8 -5 312.17 40.2
 -3 -8 5 364.86 38.2
 -3 -8 5 428.46 39.5
 2 8 -5 3.8 5.7
 2 8 -5 5.7 17.5
 -2 -8 5 8 4.7
 -2 -8 5 5.8 5.7
 -2 -8 5 4.2 4.3
 1 8 -5 72.49 14.2
 1 8 -5 83.79 30.2
 -1 -8 5 80.39 16.9
 -1 -8 5 99.79 11.9
 -1 -8 5 69.89 12.6
 -1 -8 5 77.49 12
 0 8 -5 2.3 5.8
 0 8 -5 5 15.9
 0 -8 5 13 5.5
 0 -8 5 1.5 7.7
 0 -8 5 7.9 4.4
 -1 8 -5 301.07 52.79
 1 -8 5 326.17 42
 1 -8 5 300.77 34.8
 1 -8 5 343.67 33.7
 -2 8 -5 506.65 80.79
 2 -8 5 679.03 62.09
 2 -8 5 566.74 61.49
 2 -8 5 707.43 73.19
 -3 8 -5 305.67 58.39
 3 -8 5 357.26 47.3
 3 -8 5 331.07 35.3
 3 -8 5 361.46 36
 -4 8 -5 949.71 108.89
 -4 8 -5 915.41 128.79
 4 -8 5 1228.38 124.39
 4 -8 5 1210.38 103.69
 4 -8 5 982.6 104.49
 -5 8 -5 4.2 18.6
 -5 8 -5 -9.2 25
 5 -8 5 2.3 13.9
 5 -8 5 1.1 6
 5 -8 5 7 5.7
 6 7 -5 258.27 27.6
 -6 -7 5 208.88 26.5
 -6 -7 5 247.18 25.5
 5 7 -5 281.77 30.3
 -5 -7 5 204.48 35.8
 -5 -7 5 317.27 28.7
 -5 -7 5 313.17 32.3
 4 7 -5 453.75 49
 -4 -7 5 568.64 48
 -4 -7 5 566.84 48.8
 -4 -7 5 399.76 49.4
 -4 -7 5 459.85 48.8
 3 7 -5 32.1 8.4
 3 7 -5 59.39 21
 -3 -7 5 24.4 6.7
 -3 -7 5 49.4 7.4
 2 7 -5 505.05 58.39
 2 7 -5 332.17 40.5
 -2 -7 5 370.46 39.1
 -2 -7 5 381.66 39.7
 1 7 -5 2.2 4
 1 7 -5 8.3 13.5
 -1 -7 5 3.7 6.1
 -1 -7 5 -0.9 4
 -1 -7 5 8.2 4.1
 0 7 -5 135.29 30.9
 0 7 -5 134.09 18.8
 0 -7 5 167.18 17.4
 0 -7 5 163.38 17.8
 0 -7 5 149.69 23.2
 -1 7 -5 234.78 56.49
 1 -7 5 247.68 25.9
 -2 7 -5 822.82 114.29
 2 -7 5 1106.79 98.49
 2 -7 5 1050.89 107.69
 2 -7 5 1010 97.89
 -3 7 -5 519.45 63.89
 -3 7 -5 540.85 78.79
 3 -7 5 701.03 60.09
 3 -7 5 586.94 59.19
 3 -7 5 674.53 71.29
 -4 7 -5 644.04 86.99
 -4 7 -5 736.33 100.59
 4 -7 5 957.9 78.39
 4 -7 5 772.72 77.39
 4 -7 5 848.82 90.79
 -5 7 -5 530.25 81.89
 -5 7 -5 489.05 72.99
 5 -7 5 659.83 57.39
 5 -7 5 550.64 56.59
 5 -7 5 681.23 73.59
 5 -7 5 505.25 56.89
 -6 7 -5 44.8 30.6
 -6 7 -5 25.5 33.5
 -6 7 -5 16.4 8
 6 -7 5 30.6 7.2
 6 -7 5 26.3 6.8
 6 -7 5 39 20.9
 -7 7 -5 131.79 18.9
 -7 7 -5 111.29 46.2
 7 -7 5 145.99 19.1
 7 -7 5 153.88 18.9
 7 6 -5 7 6.4
 -7 -6 5 3.1 4.3
 -7 -6 5 0.9 5.5
 -7 -6 5 16.1 24.1
 6 6 -5 1038.6 103.49
 -6 -6 5 1065.99 102.29
 -6 -6 5 1056.49 103.39
 5 6 -5 80.59 12.4
 -5 -6 5 69.99 25.4
 -5 -6 5 88.89 11.9
 -5 -6 5 94.19 11
 4 6 -5 669.83 70.29
 -4 -6 5 743.83 69.39
 -4 -6 5 819.42 70.29
 -4 -6 5 605.34 76.79
 3 6 -5 284.97 27.1
 -3 -6 5 224.58 27.8
 -3 -6 5 225.88 26.2
 -3 -6 5 253.97 26.1
 -3 -6 5 286.97 25.7
 2 6 -5 223.58 34.4
 -2 -6 5 163.38 22.8
 -2 -6 5 202.38 20.5
 1 6 -5 1.3 10.3
 1 6 -5 2 3.5
 -1 -6 5 3.9 2.8
 -1 -6 5 1.1 4.7
 0 6 -5 24.6 6.2
 0 6 -5 51.09 18.9
 0 -6 5 36.9 10.8
 0 -6 5 33.1 5.9
 0 -6 5 32.8 6.3
 -1 6 -5 575.94 75.19
 1 -6 5 618.84 61.09
 1 -6 5 629.44 61.59
 1 -6 5 655.03 68.79
 -2 6 -5 36.8 17.2
 -2 6 -5 22 7.6
 2 -6 5 45.5 14.1
 2 -6 5 34.4 5.7
 2 -6 5 18.2 5.2
 -3 6 -5 1172.78 131.99
 -3 6 -5 1130.69 141.19
 3 -6 5 1430.36 124.79
 3 -6 5 1277.07 123.99
 3 -6 5 1408.16 135.49
 -4 6 -5 269.37 48.2
 -4 6 -5 238.28 42.9
 4 -6 5 264.77 30.5
 4 -6 5 291.57 30.1
 4 -6 5 349.27 31
 4 -6 5 357.46 43.3
 -5 6 -5 683.03 93.39
 -5 6 -5 743.43 70.79
 -5 6 -5 621.84 88.59
 5 -6 5 743.13 70.69
 5 -6 5 667.23 70.99
 5 -6 5 817.62 71.29
 -6 6 -5 317.97 93.39
 -6 6 -5 315.57 32.5
 -6 6 -5 247.48 54.89
 6 -6 5 350.56 33
 6 -6 5 358.26 48.4
 6 -6 5 269.47 32.6
 6 -6 5 306.17 32.4
 -7 6 -5 96.19 14.3
 -7 6 -5 35.9 29.4
 -7 6 -5 67.89 36.4
 7 -6 5 61.09 11.4
 7 -6 5 78.49 28.8
 7 -6 5 84.89 12.4
 7 -6 5 49.9 10.3
 8 5 -5 60.09 10.2
 -8 -5 5 48 36.8
 -8 -5 5 51.29 10.6
 7 5 -5 1238.08 115.79
 -7 -5 5 1237.78 116.69
 -7 -5 5 1233.68 117.29
 -7 -5 5 1075.79 114.49
 -6 -5 5 55.69 26
 -6 -5 5 82.79 10.9
 5 5 -5 2031.3 179.38
 -5 -5 5 1887.11 178.38
 -5 -5 5 1670.73 178.98
 4 5 -5 9 3.9
 -4 -5 5 6 3.5
 -4 -5 5 2.5 2.6
 -4 -5 5 -2.9 10.7
 3 5 -5 1182.58 111.39
 -3 -5 5 1137.69 111.69
 -3 -5 5 969 124.59
 -3 -5 5 1201.78 110.59
 -3 -5 5 1208.38 111.09
 2 5 -5 20.8 12
 2 5 -5 7.9 3.5
 -2 -5 5 11.3 3.2
 -2 -5 5 11 3.6
 -2 -5 5 15 5.9
 -2 -5 5 12.2 5.5
 -2 -5 5 13.9 3.8
 1 5 -5 26.3 6.1
 1 5 -5 45.3 16.7
 -1 -5 5 37.9 5.7
 -1 -5 5 37.4 9.3
 0 5 -5 97.49 22.2
 0 5 -5 112.19 14.7
 0 -5 5 149.19 14.3
 0 -5 5 133.89 14.2
 0 -5 5 131.89 19.1
 -1 5 -5 139.59 27
 1 -5 5 168.98 16.3
 1 -5 5 167.88 22.8
 1 -5 5 125.79 15.6
 -2 5 -5 544.85 62.59
 -2 5 -5 564.94 71.69
 2 -5 5 630.24 66.89
 2 -5 5 639.74 58.69
 2 -5 5 601.14 57.99
 -3 5 -5 100.89 22.5
 -3 5 -5 82.09 23.5
 3 -5 5 115.69 21.3
 3 -5 5 135.59 13.6
 3 -5 5 125.79 12.8
 -4 5 -5 1445.36 134.89
 -4 5 -5 1316.67 152.48
 -4 5 -5 1273.07 149.69
 4 -5 5 1249.97 134.99
 4 -5 5 1557.54 135.39
 4 -5 5 1366.56 134.59
 4 -5 5 1587.24 147.79
 -5 5 -5 157.48 37.7
 -5 5 -5 154.68 34.3
 -5 5 -5 165.28 17.4
 5 -5 5 133.19 17.4
 5 -5 5 154.68 17.3
 5 -5 5 195.18 30.4
 -6 5 -5 1341.07 115.19
 -6 5 -5 1156.68 142.19
 6 -5 5 980.2 114.99
 6 -5 5 1132.39 114.89
 6 -5 5 1316.97 115.39
 -7 5 -5 147.09 54.19
 -7 5 -5 123.39 41.1
 -7 5 -5 190.38 21.7
 7 -5 5 246.18 39.4
 7 -5 5 162.58 21.4
 7 -5 5 229.18 22
 -8 5 -5 69.99 13.1
 -8 5 -5 43.3 34.9
 -8 5 -5 47.3 41.1
 8 -5 5 81.39 11.9
 8 -5 5 70.99 25.7
 8 -5 5 32.4 9.3
 8 4 -5 126.49 15.4
 8 4 -5 140.99 21.5
 -8 -4 5 125.09 18.2
 -8 -4 5 79.69 41.6
 -8 -4 5 133.69 16.3
 7 4 -5 505.15 55.99
 7 4 -5 588.74 52.79
 -7 -4 5 384.46 75.79
 -7 -4 5 593.34 54.19
 -7 -4 5 487.95 53.19
 -7 -4 5 544.75 51.69
 6 4 -5 957.1 87.39
 6 4 -5 814.92 89.59
 -6 -4 5 748.53 106.79
 -6 -4 5 987 86.69
 5 4 -5 950.3 85.19
 -5 -4 5 838.42 85.29
 -5 -4 5 836.52 84.29
 4 4 -5 2182.98 224.98
 -4 -4 5 2383.96 224.58
 -4 -4 5 2478.25 225.28
 3 4 -5 45.9 7
 -3 -4 5 48.6 6.9
 -3 -4 5 40.3 6.5
 -3 -4 5 51.29 6.3
 2 4 -5 192.48 20.9
 -2 -4 5 222.28 23.1
 -2 -4 5 175.98 25.9
 -2 -4 5 195.08 20.4
 -2 -4 5 201.68 20.8
 1 4 -5 198.88 22.6
 1 4 -5 269.47 33.4
 -1 -4 5 220.98 22.2
 -1 -4 5 203.98 25.6
 0 4 -5 139.89 15.6
 0 4 -5 121.59 23.2
 0 -4 5 143.29 14.9
 0 -4 5 150.28 20
 -1 4 -5 10.9 7.9
 -1 4 -5 12.7 4.4
 1 -4 5 16.6 3.1
 1 -4 5 10.8 2.7
 1 -4 5 14.3 7.1
 -2 4 -5 1091.59 121.89
 -2 4 -5 1150.28 116.69
 2 -4 5 1190.58 118.19
 2 -4 5 1218.28 110.09
 2 -4 5 1057.09 109.29
 -3 4 -5 1449.15 139.79
 -3 4 -5 1220.68 151.88
 -3 4 -5 1436.06 151.98
 3 -4 5 1699.93 151.08
 3 -4 5 1448.36 139.69
 3 -4 5 1483.75 140.29
 -4 4 -5 347.37 50.89
 -4 4 -5 350.26 34.2
 4 -4 5 300.67 33.9
 4 -4 5 332.57 34.5
 4 -4 5 401.06 35
 -5 4 -5 1999.6 184.38
 -5 4 -5 2007.3 207.58
 5 -4 5 1673.83 184.88
 5 -4 5 2177.38 184.98
 5 -4 5 1779.82 184.18
 -6 4 -5 66.99 26.1
 -6 4 -5 60.99 27.8
 -6 4 -5 57.99 9.4
 6 -4 5 57.89 8.9
 6 -4 5 70.69 9.5
 6 -4 5 77.19 21.6
 6 -4 5 54.79 9
 -7 4 -5 742.73 113.39
 -7 4 -5 1032.3 85.29
 -7 4 -5 689.13 102.99
 7 -4 5 1005.3 84.99
 7 -4 5 757.82 84.49
 -8 4 -5 12.3 7.6
 -8 4 -5 7.8 32.3
 -8 4 -5 9.7 20.6
 8 -4 5 18.7 16.5
 8 -4 5 12.4 6.1
 8 -4 5 17.2 6.8
 -9 4 -5 43 32.8
 -9 4 -5 78.99 51.99
 -9 4 -5 66.99 13.7
 9 -4 5 104.29 31.7
 9 -4 5 55.29 13.7
 9 -4 5 104.59 14.4
 9 3 -5 9.8 5.3
 9 3 -5 5.3 11.2
 -9 -3 5 6.6 5.7
 -9 -3 5 -5.4 38
 8 3 -5 351.66 42.2
 8 3 -5 375.46 37.9
 -8 -3 5 306.67 71.69
 -8 -3 5 427.46 39.6
 7 3 -5 26.2 5
 7 3 -5 29.9 9.5
 -7 -3 5 23.4 5.7
 -7 -3 5 14.9 5.6
 6 3 -5 1115.09 129.89
 6 3 -5 1423.26 127.89
 -6 -3 5 1317.07 128.69
 -6 -3 5 1407.66 127.39
 -6 -3 5 1328.87 128.89
 5 3 -5 624.14 61.99
 5 3 -5 584.64 63.79
 -5 -3 5 645.04 62.69
 -5 -3 5 673.13 61.69
 4 3 -5 1737.73 178.58
 4 3 -5 1817.82 180.08
 -4 -3 5 2054.49 179.28
 -4 -3 5 1853.01 178.28
 3 3 -5 1353.06 140.49
 -3 -3 5 1498.25 140.79
 -3 -3 5 1483.55 140.19
 -3 -3 5 1513.85 140.99
 2 3 -5 209.68 21.4
 -2 -3 5 232.48 23.9
 -2 -3 5 188.28 21.2
 -2 -3 5 202.38 21
 1 3 -5 213.88 23
 -1 -3 5 227.68 22.6
 -1 -3 5 220.08 23.9
 -1 -3 5 242.08 26.9
 0 3 -5 31 12.6
 0 3 -5 22.1 4.5
 0 -3 5 41.5 7.1
 0 -3 5 23 4.2
 0 -3 5 31.5 8.7
 -1 3 -5 989.9 101.59
 -1 3 -5 930.21 107.89
 1 -3 5 1039.1 98.99
 1 -3 5 1200.88 106.89
 1 -3 5 995.9 98.39
 -2 3 -5 16.6 9.9
 -2 3 -5 15.5 8.2
 2 -3 5 21.6 3.7
 2 -3 5 15.1 7.4
 2 -3 5 20 2.8
 -3 3 -5 1514.95 180.18
 -3 3 -5 1721.43 182.18
 -3 3 -5 1854.11 169.28
 3 -3 5 1969.4 170.08
 3 -3 5 1808.72 169.18
 3 -3 5 1717.23 169.68
 -4 3 -5 609.84 77.19
 -4 3 -5 587.74 79.59
 -4 3 -5 717.83 64.39
 4 -3 5 628.74 64.69
 4 -3 5 629.64 64.29
 4 -3 5 802.62 76.69
 -5 3 -5 973.3 109.29
 -5 3 -5 858.61 101.19
 5 -3 5 904.91 85.79
 5 -3 5 830.52 86.19
 -6 3 -5 1180.08 144.09
 -6 3 -5 1512.25 124.89
 -6 3 -5 1206.08 149.59
 6 -3 5 1194.18 124.39
 -7 3 -5 149.59 46
 -7 3 -5 108.89 31.7
 -7 3 -5 145.59 17.2
 7 -3 5 115.59 16.1
 7 -3 5 188.58 31.2
 -8 3 -5 293.37 30.4
 -8 3 -5 278.77 68.69
 -8 3 -5 188.78 47.4
 8 -3 5 254.47 29.8
 8 -3 5 338.87 45.6
 -9 3 -5 10.4 22.8
 -9 3 -5 8.1 8.4
 -9 3 -5 3.8 42.9
 9 -3 5 7.3 6.8
 9 -3 5 15.1 8.1
 9 -3 5 7 16.5
 9 2 -5 248.38 24
 9 2 -5 212.28 29.5
 -9 -2 5 257.97 27.5
 -9 -2 5 202.28 25.6
 -9 -2 5 205.48 73.29
 8 2 -5 112.09 13.1
 8 2 -5 118.79 18
 -8 -2 5 126.59 14.9
 -8 -2 5 119.09 16.1
 7 2 -5 754.32 87.59
 7 2 -5 896.71 84.89
 -7 -2 5 933.61 86.39
 -7 -2 5 913.71 86.99
 6 2 -5 130.49 19.6
 6 2 -5 159.58 15.8
 -6 -2 5 114.39 18.5
 -6 -2 5 183.58 17.9
 5 2 -5 2008.2 188.08
 -5 -2 5 1943.41 188.98
 -5 -2 5 1956.5 189.18
 -5 -2 5 1959.4 187.78
 4 2 -5 294.67 29.9
 4 2 -5 273.77 28.2
 -4 -2 5 296.37 28.1
 -4 -2 5 300.67 29.1
 -4 -2 5 266.57 28.9
 3 2 -5 1712.53 149.39
 3 2 -5 1425.26 150.18
 -3 -2 5 1531.55 149.09
 -3 -2 5 1415.16 150.98
 -3 -2 5 1726.43 149.79
 2 2 -5 1075.69 105.09
 -2 -2 5 1136.79 104.99
 -2 -2 5 1074.29 108.19
 1 2 -5 708.53 68.49
 -1 -2 5 758.42 70.69
 -1 -2 5 729.33 72.99
 -1 -2 5 629.54 68.19
 -1 -2 5 719.13 68.29
 0 2 -5 44.1 6.7
 0 2 -5 36.3 11.3
 0 -2 5 47.2 7.3
 0 -2 5 37.4 5
 0 -2 5 42.1 9.6
 -1 2 -5 83.79 12.2
 -1 2 -5 74.29 15.2
 1 -2 5 114.69 17.4
 1 -2 5 66.89 8.6
 1 -2 5 89.29 15.2
 1 -2 5 76.59 8
 -2 2 -5 2056.59 194.38
 -2 2 -5 1849.02 203.88
 -2 2 -5 2103.59 204.18
 2 -2 5 2130.79 194.38
 -3 2 -5 6.4 1.8
 -3 2 -5 6.7 9.4
 -3 2 -5 3.6 5.5
 3 -2 5 4.8 1.7
 3 -2 5 6.3 5.7
 3 -2 5 8.3 2.3
 -4 2 -5 3632.94 361.36
 -4 2 -5 3432.66 355.26
 4 -2 5 3719.03 343.47
 -5 2 -5 229.38 21.6
 -5 2 -5 154.88 36.9
 -5 2 -5 170.08 31.6
 5 -2 5 260.97 33.2
 5 -2 5 187.68 21.2
 -6 2 -5 1152.28 95.79
 -6 2 -5 936.51 120.19
 -6 2 -5 906.01 109.29
 6 -2 5 897.21 95.19
 -7 2 -5 361.86 36.5
 -7 2 -5 339.57 64.09
 -7 2 -5 295.27 49.99
 7 -2 5 373.36 36.4
 -8 2 -5 143.49 19.1
 -8 2 -5 103.39 31.8
 -8 2 -5 154.78 54.39
 8 -2 5 214.38 33.1
 8 -2 5 137.99 18.3
 -9 2 -5 40.6 23.2
 -9 2 -5 34.8 43.9
 -9 2 -5 56.49 11.7
 9 -2 5 73.39 25.5
 9 -2 5 31.9 10.9
 9 1 -5 22.1 9.7
 -9 -1 5 14.6 9.6
 -9 -1 5 13.9 6.2
 -9 -1 5 15.7 8
 8 1 -5 211.58 20.7
 8 1 -5 190.18 24.8
 -8 -1 5 187.38 27.2
 -8 -1 5 219.18 22.9
 -8 -1 5 215.58 23.7
 7 1 -5 501.85 51.89
 7 1 -5 509.35 48.6
 -7 -1 5 447.36 53.59
 -7 -1 5 511.35 50.89
 -7 -1 5 554.54 50.49
 6 1 -5 703.33 76.39
 -6 -1 5 827.42 75.49
 5 1 -5 780.22 80.99
 5 1 -5 790.12 78.99
 -5 -1 5 845.12 80.59
 -5 -1 5 807.72 81.99
 -5 -1 5 908.51 80.39
 4 1 -5 2381.96 216.38
 4 1 -5 2046.3 217.68
 -4 -1 5 2256.57 217.48
 -4 -1 5 2404.16 217.38
 -4 -1 5 2132.59 218.28
 -4 -1 5 2385.36 216.18
 3 1 -5 3.9 2.4
 3 1 -5 4.8 1.4
 -3 -1 5 1.7 1.9
 -3 -1 5 3.3 1.1
 -3 -1 5 6.1 2.1
 2 1 -5 1866.91 175.68
 2 1 -5 2095.39 175.18
 -2 -1 5 1561.64 175.28
 -2 -1 5 1817.62 174.88
 -1 -1 5 5473.45 575.04
 -1 -1 5 6615.94 575.04
 -1 -1 5 5766.62 575.14
 -1 -1 5 6256.67 578.24
 -1 -1 5 6125.79 579.44
 0 1 -5 42.5 7.3
 0 1 -5 49.7 11.1
 0 -1 5 37.2 7.1
 0 -1 5 49.6 10
 0 -1 5 48.6 4.7
 -1 1 -5 4271.17 478.05
 1 -1 5 5637.64 479.65
 -2 1 -5 55.19 15
 -2 1 -5 38.1 11.1
 -2 1 -5 60.69 5.5
 2 -1 5 72.99 14.1
 2 -1 5 38.3 5.6
 2 -1 5 77.79 18.4
 -3 1 -5 2180.48 230.58
 -3 1 -5 2683.53 221.68
 -3 1 -5 2495.25 221.28
 -3 1 -5 2107.39 233.88
 3 -1 5 2088.29 221.38
 -4 1 -5 383.26 35.2
 -4 1 -5 305.67 49.3
 -4 1 -5 397.76 35.5
 -4 1 -5 306.67 43.8
 4 -1 5 346.17 35.3
 -5 1 -5 4887.91 402.26
 -5 1 -5 3759.52 412.46
 -5 1 -5 4636.14 401.96
 -5 1 -5 3736.13 421.06
 5 -1 5 3958.5 401.86
 -6 1 -5 40.4 23.6
 -6 1 -5 46.2 7.4
 -6 1 -5 39.4 6.9
 -6 1 -5 38.4 16.1
 6 -1 5 57.79 16.1
 6 -1 5 37.8 6.9
 -7 1 -5 1197.68 94.69
 -7 1 -5 807.32 106.19
 -7 1 -5 908.81 122.09
 7 -1 5 898.21 94.19
 -8 1 -5 2.8 24.5
 -8 1 -5 8.6 14.2
 -8 1 -5 24.1 7.2
 -8 1 -5 15.8 5.3
 8 -1 5 25.9 13
 8 -1 5 45.1 9.2
 8 -1 5 16.9 4.5
 -9 1 -5 89.79 14.5
 -9 1 -5 63.09 23.5
 -9 1 -5 50.09 39.8
 -9 1 -5 87.09 17.4
 9 -1 5 67.19 14
 9 -1 5 112.09 25
 9 -1 5 84.29 11.1
 -10 1 -5 5.1 22.1
 -10 1 -5 5.7 9.5
 10 -1 5 11.5 16.2
 10 -1 5 8.9 5.6
 9 0 -5 14 10.3
 -9 0 5 4 13.4
 -9 0 5 18.3 7.3
 8 0 -5 113.59 16.2
 -8 0 5 100.59 14.9
 -8 0 5 111.49 14
 -8 0 5 109.39 22.5
 7 0 -5 195.38 26
 -7 0 5 238.78 25.8
 -7 0 5 266.97 25.5
 -7 0 5 239.78 31.5
 6 0 -5 1122.79 105.99
 6 0 -5 935.41 108.09
 -6 0 5 1161.38 112.69
 -6 0 5 1163.98 107.69
 -6 0 5 1155.78 108.19
 5 0 -5 1903.11 182.88
 5 0 -5 1957.4 185.18
 -5 0 5 1951.4 184.38
 -5 0 5 1862.91 184.68
 -5 0 5 1934.61 187.98
 4 0 -5 1592.44 167.08
 -4 0 5 1703.93 169.38
 -4 0 5 1669.53 166.98
 -4 0 5 1987.3 166.88
 3 0 -5 2755.82 289.57
 -3 0 5 3310.17 289.47
 2 0 -5 174.98 20.4
 2 0 -5 197.08 20.1
 -2 0 5 200.38 20.2
 -2 0 5 212.18 19.3
 -2 0 5 204.58 19.9
 1 0 -5 208.28 23.4
 1 0 -5 259.07 23.1
 -1 0 5 237.58 23.3
 -1 0 5 234.38 26.5
 -1 0 5 239.18 23
 0 0 -5 6.8 1.4
 0 0 -5 9.5 4.4
 0 0 5 5.8 1.1
 0 0 5 5.6 3.3
 -1 0 -5 7.3 4.5
 -1 0 -5 9.9 1.4
 -1 0 -5 7.6 5
 1 0 5 10.7 1.5
 1 0 5 10.5 5.2
 -2 0 -5 9.4 1.7
 -2 0 -5 10 7.9
 -2 0 -5 12.6 7.1
 2 0 5 5.4 1.5
 2 0 5 16.2 10.1
 2 0 5 14.7 7.9
 -3 0 -5 1207.18 134.59
 -3 0 -5 1480.15 127.29
 -3 0 -5 1320.57 140.79
 3 0 5 1284.17 127.29
 -4 0 -5 1673.03 182.18
 -4 0 -5 2018.3 173.78
 -4 0 -5 1825.62 191.38
 -4 0 -5 1995.6 174.08
 4 0 5 1552.34 173.88
 -5 0 -5 941.81 118.29
 -5 0 -5 877.01 107.89
 -5 0 -5 1186.48 99.99
 -5 0 -5 1142.39 99.69
 5 0 5 958.9 99.89
 -6 0 -5 1880.91 215.18
 -6 0 -5 2310.67 191.98
 6 0 5 1759.92 191.78
 -7 0 -5 38.7 24.4
 -7 0 -5 99.99 11.6
 -7 0 -5 97.79 11.1
 -7 0 -5 47.8 18
 7 0 5 70.69 9.4
 7 0 5 76.69 11.6
 7 0 5 110.09 19.9
 -8 0 -5 405.26 80.09
 -8 0 -5 563.24 53.49
 -8 0 -5 612.14 53.79
 8 0 5 440.06 53.69
 8 0 5 548.15 52.09
 -9 0 -5 22 6.9
 -9 0 -5 14.4 31.5
 -9 0 -5 13.1 16
 -9 0 -5 18.7 8.1
 9 0 5 26.5 8.5
 9 0 5 31.7 14.1
 9 0 5 41.3 7.5
 -10 0 -5 7.2 9.2
 -10 0 -5 13.6 20.2
 10 0 5 12.3 5.9
 10 0 5 12.2 14.5
 9 -1 -5 1.1 7.1
 -9 1 5 5.5 7.5
 -9 1 5 -0.5 13.7
 8 -1 -5 7.9 6
 -8 1 5 7.9 4.8
 -8 1 5 13 5.6
 -8 1 5 8 10.9
 7 -1 -5 485.45 55.59
 -7 1 5 566.44 55.79
 -7 1 5 550.64 62.99
 -7 1 5 598.24 55.19
 6 -1 -5 150.18 18.8
 -6 1 5 181.28 19.1
 -6 1 5 174.88 24.6
 -6 1 5 169.58 18.4
 5 -1 -5 2970.3 317.87
 5 -1 -5 3374.06 317.67
 -5 1 5 3216.98 322.17
 -5 1 5 3422.56 317.67
 -5 1 5 3596.74 317.17
 4 -1 -5 749.92 86.19
 -4 1 5 942.11 85.59
 -4 1 5 985.8 90.49
 -4 1 5 842.22 85.89
 3 -1 -5 5924.11 627.54
 3 -1 -5 6553.94 627.04
 -3 1 5 7269.27 631.14
 -3 1 5 6589.94 626.84
 2 -1 -5 1808.82 181.98
 2 -1 -5 1821.82 181.38
 -2 1 5 2067.99 181.48
 1 -1 -5 2746.73 271.57
 1 -1 -5 2916.51 272.27
 -1 1 5 2672.43 271.47
 -1 1 5 2832.82 271.47
 -1 1 5 2864.81 272.07
 -1 1 5 3113.29 276.47
 0 -1 -5 292.87 33.8
 0 -1 -5 323.87 30
 0 1 5 299.57 29.8
 0 1 5 320.07 34
 0 1 5 299.87 29.6
 -1 -1 -5 921.31 91.99
 -1 -1 -5 890.81 85.99
 -1 -1 -5 825.22 85.69
 1 1 5 860.91 85.69
 1 1 5 1019.4 92.49
 -2 -1 -5 1642.34 149.69
 -2 -1 -5 1450.25 138.99
 2 1 5 1322.87 138.99
 2 1 5 1438.06 138.99
 -3 -1 -5 305.07 41.5
 -3 -1 -5 293.57 28.8
 3 1 5 308.67 28.8
 3 1 5 260.67 28.9
 -4 -1 -5 977.6 117.19
 -4 -1 -5 1259.17 111.59
 -4 -1 -5 933.81 124.89
 4 1 5 1374.16 111.39
 4 1 5 1186.98 111.99
 -5 -1 -5 596.94 50.79
 -5 -1 -5 434.26 56.69
 -5 -1 -5 454.65 67.49
 5 1 5 528.65 50.09
 5 1 5 518.95 51.19
 -6 -1 -5 1310.07 119.99
 -6 -1 -5 1335.67 119.89
 6 1 5 1199.58 119.09
 6 1 5 1098.19 120.29
 -7 -1 -5 1207.18 113.09
 -7 -1 -5 1245.18 113.19
 7 1 5 1173.48 111.99
 7 1 5 1005.2 113.59
 -8 -1 -5 317.37 32.3
 -8 -1 -5 177.18 56.79
 -8 -1 -5 335.47 32.6
 8 1 5 348.57 39
 8 1 5 264.87 32.9
 8 1 5 291.27 30.7
 -9 -1 -5 230.48 71.59
 -9 -1 -5 410.96 41
 -9 -1 -5 394.06 40.4
 9 1 5 316.37 41.5
 9 1 5 472.45 48
 9 1 5 365.96 38.8
 -10 -1 -5 20.3 9.3
 10 1 5 -1.9 11.7
 10 1 5 50.29 8.1
 -9 2 5 -0.7 7.1
 -9 2 5 2.4 5.2
 -9 2 5 8.3 16.8
 8 -2 -5 117.89 16.4
 -8 2 5 125.99 16.8
 -8 2 5 120.79 15.4
 7 -2 -5 214.78 25.1
 -7 2 5 223.38 33.9
 -7 2 5 245.88 24.7
 -7 2 5 219.28 25.4
 6 -2 -5 931.61 100.29
 -6 2 5 999.7 107.39
 -6 2 5 1061.69 99.19
 -6 2 5 1074.99 100.09
 5 -2 -5 224.88 23.5
 5 -2 -5 208.28 24.3
 -5 2 5 234.38 24.2
 -5 2 5 230.28 23.4
 -5 2 5 219.68 29.4
 4 -2 -5 4286.27 446.86
 4 -2 -5 4145.69 447.56
 4 -2 -5 4736.23 445.76
 -4 2 5 4963.8 447.76
 -4 2 5 4894.31 453.35
 -4 2 5 5103.09 447.06
 3 -2 -5 7.1 2.8
 3 -2 -5 11.1 2.5
 3 -2 -5 8.9 1.5
 -3 2 5 7.5 2.9
 -3 2 5 6.7 5
 -3 2 5 12.4 2.7
 2 -2 -5 3738.23 363.76
 2 -2 -5 4118.79 363.36
 2 -2 -5 3649.14 364.46
 -2 2 5 3856.01 363.36
 -2 2 5 3697.03 364.26
 -2 2 5 3844.32 368.46
 1 -2 -5 66.09 8.1
 1 -2 -5 70.69 7.5
 -1 2 5 69.49 13.3
 -1 2 5 72.49 7.6
 -1 2 5 100.59 9.1
 0 -2 -5 552.94 57.39
 0 -2 -5 554.64 52.49
 0 2 5 560.44 57.39
 0 2 5 519.85 52.89
 0 2 5 541.55 52.49
 -1 -2 -5 604.14 54.99
 -1 -2 -5 556.14 60.99
 1 2 5 596.04 61.29
 1 2 5 527.25 54.99
 -2 -2 -5 687.73 73.99
 -2 -2 -5 669.13 64.69
 2 2 5 657.43 64.69
 -3 -2 -5 2310.97 197.28
 -3 -2 -5 1937.01 209.28
 3 2 5 1933.91 197.08
 3 2 5 2042.8 196.88
 -4 -2 -5 39.8 18.6
 -4 -2 -5 50.59 6.1
 4 2 5 40.1 5.5
 4 2 5 33.9 6.1
 -5 -2 -5 1719.53 159.38
 5 2 5 1614.54 159.88
 5 2 5 1628.94 158.78
 -6 -2 -5 148.59 15
 6 2 5 132.69 13.9
 6 2 5 92.19 14.9
 -7 -2 -5 1542.35 136.39
 7 2 5 1188.98 136.79
 7 2 5 1461.25 135.29
 -8 -2 -5 328.97 36.6
 -8 -2 -5 357.96 37.1
 8 2 5 318.87 36.4
 8 2 5 421.86 41.5
 8 2 5 293.27 38
 -9 -2 -5 323.37 44.2
 -9 -2 -5 403.36 41.5
 9 2 5 369.76 39.4
 9 2 5 415.86 44.1
 9 -3 -5 6 8.3
 -9 3 5 -1.5 17.7
 -9 3 5 5.8 8.2
 8 -3 -5 149.39 20.7
 -8 3 5 164.28 33.7
 -8 3 5 193.28 21.6
 7 -3 -5 147.49 18.9
 7 -3 -5 172.28 20.2
 7 -3 -5 163.18 15.9
 -7 3 5 156.08 19.6
 -7 3 5 157.88 30
 6 -3 -5 572.04 64.79
 6 -3 -5 645.84 64.09
 6 -3 -5 647.64 61.99
 -6 3 5 688.23 64.89
 -6 3 5 673.13 74.49
 5 -3 -5 1006.2 87.19
 5 -3 -5 855.41 88.49
 5 -3 -5 827.52 89.29
 -5 3 5 867.41 96.99
 -5 3 5 963.1 89.49
 4 -3 -5 802.62 79.79
 4 -3 -5 815.32 81.69
 4 -3 -5 799.82 80.79
 -4 3 5 919.01 81.79
 -4 3 5 850.41 88.69
 3 -3 -5 1250.47 127.69
 3 -3 -5 1433.56 126.29
 3 -3 -5 1285.37 126.89
 -3 3 5 1311.87 126.39
 -3 3 5 1312.37 133.59
 2 -3 -5 204.78 20.5
 2 -3 -5 210.28 20.2
 2 -3 -5 219.18 21.3
 -2 3 5 188.28 21
 -2 3 5 193.18 20.3
 -2 3 5 214.68 26.1
 -1 3 5 4190.38 389.86
 -1 3 5 4158.38 390.46
 -1 3 5 3930.81 395.06
 0 -3 -5 119.09 11.4
 0 -3 -5 84.49 14.9
 0 -3 -5 102.19 10.6
 0 3 5 104.09 15.7
 0 3 5 106.79 11.3
 0 3 5 98.29 10.7
 -1 -3 -5 63.09 7.4
 -1 -3 -5 44 5.3
 -1 -3 -5 43.3 10.5
 1 3 5 38.2 5.4
 -2 -3 -5 126.79 21.3
 -2 -3 -5 119.19 13.4
 -2 -3 -5 136.09 13.7
 2 3 5 121.39 13.6
 2 3 5 182.28 27
 2 3 5 124.19 13.6
 -3 -3 -5 185.78 31.9
 -3 -3 -5 246.18 22.4
 -3 -3 -5 233.18 21.9
 3 3 5 199.48 21.9
 3 3 5 205.88 22.2
 -4 -3 -5 1167.98 150.58
 -4 -3 -5 1668.43 138.39
 -4 -3 -5 1629.24 137.69
 4 3 5 1312.77 138.29
 4 3 5 1351.96 137.59
 -5 -3 -5 634.64 57.69
 5 3 5 531.15 56.79
 5 3 5 584.64 58.19
 -6 -3 -5 2303.97 213.98
 6 3 5 2146.99 213.08
 -7 -3 -5 5.6 17.4
 -7 -3 -5 2.9 3.9
 7 3 5 3.8 3.3
 7 3 5 4.2 4.9
 -8 -3 -5 906.11 86.59
 8 3 5 973.8 88.09
 8 3 5 727.83 85.19
 -9 -3 -5 5.3 6
 -9 -3 -5 18.5 39.1
 -9 -3 -5 19.4 8.2
 9 3 5 4.8 5.3
 9 3 5 9.4 9.1
 9 -4 -5 0 8.4
 -9 4 5 14 22.7
 -9 4 5 1.1 9.1
 8 -4 -5 -5.9 5.9
 8 -4 -5 5.1 7.2
 -8 4 5 3.5 7.2
 -8 4 5 -5.9 14.8
 7 -4 -5 545.05 46.8
 7 -4 -5 447.36 50.39
 7 -4 -5 410.36 49
 -7 4 5 436.96 62.29
 -7 4 5 519.25 50.29
 6 -4 -5 13.3 6
 6 -4 -5 5.9 2.3
 6 -4 -5 2.6 3.3
 -6 4 5 5.7 5.2
 -6 4 5 2.3 8.6
 5 -4 -5 1091.99 113.39
 5 -4 -5 1088.69 114.29
 5 -4 -5 1286.77 112.29
 -5 4 5 1383.26 114.89
 -5 4 5 996.2 122.69
 4 -4 -5 353.56 38.8
 4 -4 -5 369.46 38.1
 4 -4 -5 403.26 37.2
 -4 4 5 338.77 46.1
 -4 4 5 430.46 39.1
 3 -4 -5 1241.28 113.09
 3 -4 -5 1161.48 114.49
 3 -4 -5 1096.59 113.59
 -3 4 5 1202.28 114.39
 -3 4 5 1136.79 113.29
 -3 4 5 1248.68 122.49
 2 -4 -5 2077.79 200.98
 2 -4 -5 2175.88 199.98
 -2 4 5 1962.9 200.08
 -2 4 5 2133.29 207.68
 -2 4 5 2022 206.78
 -2 4 5 2193.98 200.98
 1 -4 -5 40.4 5.7
 1 -4 -5 31.5 4.8
 -1 4 5 44.4 10.2
 -1 4 5 35.7 5.7
 -1 4 5 36.8 9.8
 -1 4 5 34.1 5.1
 0 -4 -5 759.72 79.39
 0 -4 -5 749.82 74.69
 0 -4 -5 782.82 74.09
 0 4 5 779.02 74.29
 0 4 5 759.62 80.09
 0 4 5 768.42 79.29
 -1 -4 -5 84.39 9.1
 -1 -4 -5 68.09 9
 -1 -4 -5 83.09 14.7
 -1 -4 -5 73.79 9.8
 1 4 5 90.69 16
 1 4 5 88.29 9.4
 -2 -4 -5 28.3 11.4
 -2 -4 -5 25.6 4.4
 -2 -4 -5 22.4 4.1
 2 4 5 46.9 16.4
 2 4 5 28.9 4.6
 -3 -4 -5 667.13 81.79
 -3 -4 -5 803.32 70.99
 -3 -4 -5 731.13 71.09
 3 4 5 702.93 70.99
 -4 -4 -5 1817.32 172.38
 -4 -4 -5 1921.71 173.08
 4 4 5 1631.54 173.08
 4 4 5 1815.02 172.68
 -5 -4 -5 878.41 87.89
 -5 -4 -5 1041.9 89.09
 5 4 5 876.11 88.19
 5 4 5 837.22 89.19
 -6 -4 -5 800.62 73.59
 6 4 5 704.13 74.39
 6 4 5 719.23 72.69
 -7 -4 -5 1080.09 96.49
 7 4 5 976.1 95.49
 7 4 5 867.41 97.39
 -8 -4 -5 86.69 36.9
 -8 -4 -5 172.78 19.1
 8 4 5 154.48 21.8
 8 4 5 170.58 18.1
 -9 -4 -5 186.18 22.6
 -9 -4 -5 203.48 23.5
 9 4 5 157.68 26.3
 9 4 5 192.48 21.9
 8 -5 -5 -1.5 8.4
 8 -5 -5 1.5 8.9
 8 -5 -5 -0.4 3
 -8 5 5 -2.1 17.9
 -8 5 5 -3.6 9.5
 7 -5 -5 27.4 7
 7 -5 -5 27.3 5.3
 7 -5 -5 24.2 8.3
 -7 5 5 26.9 18.8
 -7 5 5 18.4 8.1
 6 -5 -5 802.92 86.29
 6 -5 -5 822.02 87.19
 6 -5 -5 871.51 84.69
 -6 5 5 860.41 101.39
 -6 5 5 1069.39 88.19
 5 -5 -5 20.6 6.5
 5 -5 -5 15.2 3.5
 -5 5 5 21.2 12.9
 -5 5 5 18.4 5.8
 4 -5 -5 1159.18 115.09
 4 -5 -5 1116.49 115.79
 4 -5 -5 1161.48 114.19
 -4 5 5 1307.47 116.09
 -4 5 5 1214.58 127.09
 3 -5 -5 139.69 13
 3 -5 -5 118.09 14.2
 3 -5 -5 107.69 13.2
 -3 5 5 125.79 14.3
 -3 5 5 106.79 21
 -3 5 5 108.69 13
 2 -5 -5 1915.11 175.08
 2 -5 -5 1794.22 176.08
 -2 5 5 1665.33 175.28
 -2 5 5 1807.32 184.08
 -2 5 5 1914.01 176.28
 -2 5 5 1877.61 183.08
 1 -5 -5 1147.99 118.59
 1 -5 -5 1299.97 117.99
 -1 5 5 1209.58 125.49
 -1 5 5 1392.06 119.29
 -1 5 5 1152.88 118.19
 -1 5 5 1168.08 124.49
 0 -5 -5 84.49 9.6
 0 -5 -5 80.59 10.4
 0 5 5 86.69 10.2
 0 5 5 87.29 15.9
 0 5 5 79.49 14.9
 -1 -5 -5 46.8 11.8
 -1 -5 -5 49.99 8
 -1 -5 -5 75.89 7.8
 -1 -5 -5 52.69 7.1
 1 5 5 70.19 15
 1 5 5 55.99 7.5
 1 5 5 51.99 11.3
 -2 -5 -5 32.2 12
 -2 -5 -5 25.7 4.5
 -2 -5 -5 23.8 4.9
 -2 -5 -5 19.8 5.1
 2 5 5 21 7.5
 2 5 5 34.5 5.2
 2 5 5 38.4 16.2
 -3 -5 -5 362.86 35.2
 -3 -5 -5 366.06 35.5
 -3 -5 -5 330.27 45.7
 3 5 5 332.17 35.4
 3 5 5 352.76 38.4
 -4 -5 -5 9.2 3.1
 -4 -5 -5 0.8 9.5
 -4 -5 -5 8.5 3.7
 4 5 5 11.2 3.5
 4 5 5 12.2 5
 -5 -5 -5 1616.74 149.49
 -5 -5 -5 1775.72 148.19
 5 5 5 1278.87 148.59
 5 5 5 1436.86 148.29
 5 5 5 1514.75 147.99
 -6 -5 -5 164.38 18.9
 -6 -5 -5 217.78 20.8
 6 5 5 169.08 21.2
 6 5 5 154.88 19.4
 -7 -5 -5 1284.77 111.59
 7 5 5 1057.29 112.69
 7 5 5 1057.59 110.29
 -8 -5 -5 307.07 32.3
 8 5 5 269.67 30.8
 8 -6 -5 -4.1 7.3
 8 -6 -5 -1 3.9
 8 -6 -5 0.9 10.4
 -8 6 5 1.2 10.3
 -8 6 5 0.9 25.1
 7 -6 -5 28.9 8.6
 7 -6 -5 23.6 9.9
 7 -6 -5 36.9 6.8
 -7 6 5 32 10.4
 -7 6 5 27.5 20.1
 6 -6 -5 220.58 24.3
 6 -6 -5 231.78 22.5
 6 -6 -5 177.28 24.9
 -6 6 5 226.68 25.6
 -6 6 5 201.08 40.9
 5 -6 -5 1015.1 112.49
 5 -6 -5 1233.78 111.59
 5 -6 -5 1072.39 113.39
 -5 6 5 1346.57 114.19
 -5 6 5 1130.99 128.59
 4 -6 -5 49 9.4
 4 -6 -5 54.59 7.5
 -4 6 5 64.99 10.1
 -4 6 5 50.59 18.6
 3 -6 -5 2841.52 254.67
 3 -6 -5 2506.75 255.77
 -3 6 5 2878.31 256.17
 -3 6 5 2295.87 254.87
 -3 6 5 2807.02 265.07
 -3 6 5 2654.33 267.67
 2 -6 -5 10.8 4.1
 2 -6 -5 9.6 3.1
 -2 6 5 11.9 4.6
 -2 6 5 9.8 7.7
 -2 6 5 5.1 3.2
 -2 6 5 8.8 8.8
 1 -6 -5 1535.35 139.09
 1 -6 -5 1349.36 139.69
 -1 6 5 1473.55 146.69
 -1 6 5 1357.96 139.39
 -1 6 5 1502.15 148.79
 0 -6 -5 127.89 13.5
 0 -6 -5 109.99 14.2
 0 6 5 110.29 19.8
 0 6 5 102.99 13.6
 0 6 5 148.19 21.6
 -1 -6 -5 147.09 22.6
 -1 -6 -5 171.98 17.9
 -1 -6 -5 158.38 19
 -1 -6 -5 160.18 18
 1 6 5 159.28 23.4
 1 6 5 171.08 18.5
 1 6 5 219.38 29.7
 -2 -6 -5 31 7.2
 -2 -6 -5 30.1 6.2
 -2 -6 -5 43.1 6
 -2 -6 -5 29 10.6
 2 6 5 53.59 20.3
 2 6 5 31.3 6.3
 2 6 5 28.2 9.1
 -3 -6 -5 158.98 27.6
 -3 -6 -5 185.78 19.2
 -3 -6 -5 214.68 20.2
 3 6 5 150.08 22
 3 6 5 180.58 23.2
 -4 -6 -5 535.15 47.2
 -4 -6 -5 502.85 47.6
 -4 -6 -5 401.16 57.89
 4 6 5 436.76 47.3
 4 6 5 464.95 49.6
 -5 -6 -5 58.39 22.2
 -5 -6 -5 110.09 12.9
 -5 -6 -5 95.09 11.8
 5 6 5 80.89 12.4
 5 6 5 104.49 13.4
 -6 -6 -5 1253.67 124.89
 -6 -6 -5 1354.16 124.19
 6 6 5 1225.58 124.49
 -7 -6 -5 11.1 19.4
 -7 -6 -5 35.4 8.7
 7 6 5 20.6 6.4
 -8 -6 -5 804.02 70.09
 8 6 5 582.24 68.39
 7 -7 -5 16.2 8.1
 7 -7 -5 24.9 11.7
 7 -7 -5 23.5 6.1
 -7 7 5 18.5 10.5
 -7 7 5 15.8 27.3
 6 -7 -5 39.1 8.7
 6 -7 -5 55.49 8.5
 6 -7 -5 45.9 11.5
 -6 7 5 31.1 30.9
 -6 7 5 53.49 12
 5 -7 -5 510.95 57.39
 5 -7 -5 539.05 58.49
 5 -7 -5 649.14 56.69
 -5 7 5 564.44 70.39
 -5 7 5 525.55 75.09
 -5 7 5 625.84 58.99
 4 -7 -5 684.93 79.79
 4 -7 -5 711.73 80.89
 4 -7 -5 891.81 79.59
 -4 7 5 904.11 81.79
 -4 7 5 870.41 98.29
 -4 7 5 862.91 92.79
 3 -7 -5 721.93 64.39
 3 -7 -5 605.74 65.39
 -3 7 5 637.94 78.89
 -3 7 5 710.53 66.19
 -3 7 5 664.83 74.99
 -3 7 5 582.54 64.89
 2 -7 -5 2317.67 203.78
 2 -7 -5 1950.1 204.48
 -2 7 5 2063.59 212.38
 -2 7 5 2403.06 205.48
 -2 7 5 1977.3 204.28
 -2 7 5 2026.8 216.38
 1 -7 -5 290.17 33.4
 1 -7 -5 357.56 32.8
 -1 7 5 287.87 33.6
 -1 7 5 294.57 43.2
 -1 7 5 353.66 41.5
 0 -7 -5 845.32 77.59
 0 -7 -5 759.22 76.79
 0 7 5 749.42 85.09
 0 7 5 763.22 76.99
 -1 -7 -5 7.2 5.4
 -1 -7 -5 13.4 4.5
 -1 -7 -5 10.4 3.7
 1 7 5 7 4
 1 7 5 11.1 8.6
 1 7 5 14 13.3
 -2 -7 -5 48.5 13.4
 -2 -7 -5 47.7 7.7
 -2 -7 -5 55.59 8.8
 -2 -7 -5 75.19 11
 2 7 5 49.2 13.1
 2 7 5 44.6 8.9
 2 7 5 73.89 27
 -3 -7 -5 41.9 9.7
 -3 -7 -5 56.19 8
 -3 -7 -5 45 16.1
 -3 -7 -5 47.5 8.6
 3 7 5 47.2 12.2
 3 7 5 79.09 31.1
 3 7 5 47.3 8.9
 -4 -7 -5 249.58 25.4
 -4 -7 -5 237.18 25.9
 -4 -7 -5 202.68 35.4
 4 7 5 250.37 29.9
 4 7 5 233.38 26.2
 -5 -7 -5 324.67 32.4
 -5 -7 -5 328.77 33.1
 -5 -7 -5 275.67 45
 5 7 5 298.07 33.1
 -6 -7 -5 291.77 30.1
 -6 -7 -5 290.07 29.1
 6 7 5 225.88 29.6
 -7 -7 -5 676.93 66.99
 -7 -7 -5 638.14 65.39
 6 -8 -5 166.28 16.2
 6 -8 -5 115.19 21.4
 6 -8 -5 96.69 17
 -6 8 5 80.39 34.9
 -6 8 5 164.08 22.2
 -6 8 5 133.69 38.7
 5 -8 -5 -2.5 5.2
 5 -8 -5 -0.2 7.8
 5 -8 -5 6.1 4.4
 -5 8 5 3 17.2
 -5 8 5 -6.1 16.3
 -5 8 5 1.3 8.3
 4 -8 -5 1379.96 123.99
 4 -8 -5 1085.99 124.19
 4 -8 -5 1212.98 125.69
 -4 8 5 1245.78 144.79
 -4 8 5 1419.86 126.39
 -4 8 5 1348.86 138.09
 3 -8 -5 427.26 45.7
 3 -8 -5 478.85 44.3
 -3 8 5 430.06 61.39
 -3 8 5 483.15 46.4
 -3 8 5 459.25 56.19
 -3 8 5 350.46 44.8
 2 -8 -5 901.31 90.39
 2 -8 -5 1031.1 89.39
 -2 8 5 878.21 98.49
 -2 8 5 850.61 90.19
 -2 8 5 889.31 104.39
 1 -8 -5 417.96 49.1
 1 -8 -5 529.25 48.4
 -1 8 5 472.15 61.09
 -1 8 5 513.75 57.99
 -1 8 5 458.95 49.3
 0 -8 -5 202.18 26.5
 0 -8 -5 241.18 25.5
 0 8 5 236.88 36.1
 0 8 5 236.68 26.8
 0 8 5 277.47 37.7
 -1 -8 -5 234.88 24.5
 -1 -8 -5 207.58 25.8
 -1 -8 -5 229.88 23.9
 1 8 5 201.68 32.5
 1 8 5 186.38 24.7
 1 8 5 284.07 41.3
 -2 -8 -5 6.6 5.7
 -2 -8 -5 5 3.7
 -2 -8 -5 7.2 4.2
 2 8 5 -0.5 15.8
 2 8 5 1.9 7.9
 2 8 5 6.2 5.4
 -3 -8 -5 97.69 16.6
 -3 -8 -5 88.89 19.4
 -3 -8 -5 126.79 14.3
 -3 -8 -5 105.19 13.2
 3 8 5 96.59 14.9
 3 8 5 104.29 20.1
 -4 -8 -5 3.5 4.3
 -4 -8 -5 2.4 10.9
 -4 -8 -5 4.2 4.4
 -4 -8 -5 8.6 7.7
 4 8 5 0.6 8.5
 4 8 5 1.5 5.5
 -5 -8 -5 424.76 60.99
 -5 -8 -5 551.64 51.29
 5 8 5 516.65 51.79
 -6 -8 -5 208.38 22.4
 -6 -8 -5 109.99 35.3
 -6 -8 -5 188.78 20.9
 6 8 5 193.28 23.5
 4 -9 -5 92.89 16.6
 4 -9 -5 91.29 13.3
 -4 9 5 76.79 26.8
 -4 9 5 115.59 40.8
 3 -9 -5 864.71 80.29
 3 -9 -5 737.43 81.59
 -3 9 5 727.23 81.59
 -3 9 5 1096.29 138.09
 -3 9 5 816.22 92.19
 2 -9 -5 26.3 8.9
 2 -9 -5 27.4 6.7
 -2 9 5 23.8 18.3
 -2 9 5 32.7 16.9
 -2 9 5 28.9 8.8
 1 -9 -5 711.03 63.99
 1 -9 -5 596.64 65.19
 -1 9 5 555.24 64.99
 -1 9 5 607.24 79.59
 -1 9 5 699.93 74.29
 0 -9 -5 312.67 34.9
 0 -9 -5 320.37 32.8
 0 9 5 380.76 47.1
 0 9 5 265.77 45
 0 9 5 270.37 34.2
 -1 -9 -5 105.49 13.5
 -1 -9 -5 89.19 16.2
 -1 -9 -5 114.29 14.5
 1 9 5 68.49 24.3
 1 9 5 99.39 15.7
 1 9 5 121.79 29.6
 -2 -9 -5 80.59 11.8
 -2 -9 -5 69.09 10.6
 -2 -9 -5 58.69 13.5
 2 9 5 55.09 20.5
 2 9 5 57.59 12.2
 -3 -9 -5 16.8 6.9
 -3 -9 -5 32.9 20.4
 -3 -9 -5 24 5.9
 3 9 5 29.4 16
 3 9 5 18.8 9.1
 -4 -9 -5 113.29 15.7
 -4 -9 -5 107.09 19.8
 -4 -9 -5 90.89 22.1
 -4 -9 -5 128.99 16.9
 4 9 5 124.09 18.6
 4 9 5 152.38 28.1
 -5 -9 -5 6.6 14.6
 -5 -9 -5 13.4 7.4
 5 9 5 4.4 16
 5 9 5 -0.5 12.4
 2 -10 -5 632.74 56.99
 2 -10 -5 520.35 58.69
 -2 10 5 465.05 58.79
 -2 10 5 608.24 82.19
 1 -10 -5 6.5 6.3
 1 -10 -5 6.2 9.3
 -1 10 5 10.1 8.8
 -1 10 5 16.6 22.2
 0 -10 -5 468.35 47.7
 0 -10 -5 506.45 48.9
 0 -10 -5 488.15 50.49
 0 10 5 425.16 49.99
 0 10 5 417.96 64.39
 -1 -10 -5 124.09 20.5
 -1 -10 -5 122.79 16.5
 -1 -10 -5 103.49 15.2
 1 10 5 127.59 19.9
 1 10 5 85.69 27.5
 -2 -10 -5 43 13.3
 -2 -10 -5 46.7 10
 2 10 5 50.29 23.4
 2 10 5 43.3 14.1
 3 9 -6 364.96 44.6
 -3 -9 6 398.76 50.49
 -3 -9 6 414.66 41.9
 2 9 -6 187.38 27.8
 2 9 -6 264.07 53.19
 -2 -9 6 189.68 25.2
 -2 -9 6 210.58 24.8
 -2 -9 6 197.58 23.3
 1 9 -6 211.78 31
 1 9 -6 258.47 54.19
 -1 -9 6 250.27 28.7
 -1 -9 6 248.78 28.6
 -1 -9 6 264.27 27.6
 0 9 -6 159.48 45.7
 0 -9 6 168.48 21.3
 0 -9 6 189.88 29.6
 0 -9 6 172.18 20.6
 -1 9 -6 8.7 22.6
 1 -9 6 5.2 11.9
 1 -9 6 6.2 6.2
 1 -9 6 0 4.9
 -2 9 -6 23.9 27.2
 2 -9 6 12.5 6.1
 2 -9 6 26.2 7.4
 2 -9 6 10.4 13.4
 -3 9 -6 7.1 26.6
 3 -9 6 -1.1 15.1
 3 -9 6 -1.1 5.7
 3 -9 6 9.9 6.7
 5 8 -6 13.4 8.9
 -5 -8 6 4.1 5.2
 4 8 -6 708.53 79.39
 -4 -8 6 844.22 79.39
 -4 -8 6 797.22 78.29
 3 8 -6 151.58 36.3
 3 8 -6 67.49 14.5
 -3 -8 6 77.79 11.7
 -3 -8 6 68.99 15.2
 2 8 -6 1025.5 109.09
 -2 -8 6 1106.59 107.79
 -2 -8 6 1058.99 107.89
 -2 -8 6 1177.38 107.09
 1 8 -6 161.88 22.5
 1 8 -6 183.48 41.1
 -1 -8 6 152.98 25.1
 -1 -8 6 194.58 21.1
 -1 -8 6 183.28 19.8
 -1 -8 6 171.18 20.8
 0 8 -6 200.78 45.5
 0 -8 6 251.47 34.3
 0 -8 6 258.67 26.9
 0 -8 6 266.97 27.6
 -1 8 -6 7.6 17.6
 1 -8 6 2 4.7
 1 -8 6 -2 3.6
 1 -8 6 -0.9 7.9
 -2 8 -6 16.4 19.6
 2 -8 6 19.2 5.8
 2 -8 6 20.6 12.4
 2 -8 6 14.2 4.9
 -3 8 -6 144.39 43
 3 -8 6 158.98 18.9
 3 -8 6 162.28 30.5
 3 -8 6 195.88 20.1
 -4 8 -6 105.89 57.49
 -4 8 -6 75.69 20.7
 4 -8 6 98.09 34.2
 4 -8 6 119.69 14.7
 4 -8 6 94.09 13.3
 -5 8 -6 379.36 56.19
 -5 8 -6 452.45 77.39
 5 -8 6 393.56 44.3
 5 -8 6 528.05 62.39
 6 7 -6 144.79 18.9
 -6 -7 6 123.19 16.6
 -6 -7 6 84.79 29.9
 -6 -7 6 144.19 15.3
 5 7 -6 530.35 46.9
 -5 -7 6 513.95 44.5
 -5 -7 6 417.46 45.2
 -5 -7 6 344.67 50.79
 4 7 -6 161.38 18.7
 -4 -7 6 116.79 17.4
 -4 -7 6 125.79 16.5
 -4 -7 6 171.38 16.4
 -4 -7 6 181.28 17.3
 3 7 -6 1235.68 132.99
 -3 -7 6 1469.85 132.49
 -3 -7 6 1363.46 131.59
 2 7 -6 27.9 18.8
 2 7 -6 29.6 7
 -2 -7 6 14.7 4.5
 -2 -7 6 25.5 5.4
 -2 -7 6 13.5 7.7
 1 7 -6 1642.14 154.68
 1 7 -6 1226.58 135.09
 -1 -7 6 1445.96 139.49
 -1 -7 6 1304.67 134.09
 -1 -7 6 1333.27 133.49
 0 7 -6 19 16.8
 0 7 -6 18.8 6.8
 0 -7 6 21.7 5.8
 0 -7 6 16.4 9.7
 0 -7 6 18.5 4.7
 -1 7 -6 145.49 33.9
 1 -7 6 172.08 18.3
 1 -7 6 165.68 18.3
 1 -7 6 157.98 25.6
 -2 7 -6 0.6 14
 2 -7 6 0.8 3.6
 2 -7 6 -0.1 7.7
 2 -7 6 2 3.2
 -3 7 -6 129.79 35.8
 -3 7 -6 145.79 21.3
 3 -7 6 157.68 17.6
 3 -7 6 166.68 28.3
 3 -7 6 148.79 16.8
 -4 7 -6 192.78 44.9
 -4 7 -6 193.38 33.6
 4 -7 6 243.08 24.6
 4 -7 6 232.18 23.8
 4 -7 6 238.78 36.7
 -5 7 -6 161.78 45.7
 -5 7 -6 150.18 36
 5 -7 6 163.78 19.3
 5 -7 6 155.58 19.9
 5 -7 6 195.08 20.4
 5 -7 6 210.68 35.8
 -6 7 -6 247.68 63.59
 6 -7 6 421.46 38.3
 6 -7 6 361.56 37.4
 6 -7 6 473.15 58.39
 6 -7 6 294.07 37.5
 7 6 -6 21.2 8.3
 -7 -6 6 28 8.2
 -7 -6 6 11.9 26.6
 -7 -6 6 46 11.5
 -7 -6 6 40.5 6.9
 6 6 -6 23.9 6.9
 -6 -6 6 9.3 19.7
 -6 -6 6 17.8 4.8
 -6 -6 6 10.3 5
 5 6 -6 1130.69 101.09
 -5 -6 6 993.7 99.49
 -5 -6 6 973.2 100.29
 4 6 -6 264.97 28.2
 -4 -6 6 285.17 26.9
 -4 -6 6 205.08 34.3
 -4 -6 6 282.87 27.6
 3 6 -6 732.33 77.49
 -3 -6 6 711.03 76.89
 -3 -6 6 746.63 78.49
 -3 -6 6 896.61 76.69
 -3 -6 6 871.11 77.19
 2 6 -6 1007.2 114.99
 -2 -6 6 1319.57 114.29
 -2 -6 6 1253.37 114.69
 -2 -6 6 1130.99 117.49
 1 6 -6 305.27 41.6
 1 6 -6 481.85 57.59
 -1 -6 6 421.96 45.2
 -1 -6 6 389.06 40.9
 0 6 -6 736.33 91.79
 0 6 -6 679.03 78.59
 0 -6 6 854.81 83.99
 0 -6 6 819.72 77.29
 0 -6 6 819.32 78.29
 -1 6 -6 -2.7 9.2
 1 -6 6 5.2 3.1
 1 -6 6 3.5 2.4
 1 -6 6 2.9 6
 -2 6 -6 59.89 9.7
 -2 6 -6 58.39 22
 2 -6 6 68.39 8.4
 2 -6 6 64.19 16.3
 2 -6 6 68.69 8.8
 -3 6 -6 5 8
 -3 6 -6 2.6 11.6
 3 -6 6 4.1 3.1
 3 -6 6 2.6 7
 3 -6 6 6.5 3.3
 -4 6 -6 241.88 42.6
 -4 6 -6 263.27 49.5
 4 -6 6 377.46 45.1
 4 -6 6 306.57 30.8
 4 -6 6 351.06 31.8
 4 -6 6 276.47 31.3
 -5 6 -6 266.87 28.6
 -5 6 -6 230.98 45.9
 -5 6 -6 247.98 49.99
 5 -6 6 303.47 29.5
 5 -6 6 358.56 45.4
 5 -6 6 277.77 28.6
 5 -6 6 254.47 29
 -6 6 -6 387.66 42.2
 -6 6 -6 339.07 94.09
 -6 6 -6 382.76 67.79
 6 -6 6 363.56 42.6
 6 -6 6 430.06 42.4
 6 -6 6 472.45 43.1
 6 -6 6 516.45 60.99
 -7 6 -6 489.45 84.19
 -7 6 -6 414.96 80.79
 -7 6 -6 563.84 53.09
 7 -6 6 434.36 53.09
 7 -6 6 643.44 53.99
 7 -6 6 542.45 52.89
 8 5 -6 32.3 8.2
 -8 -5 6 10.3 34.9
 7 5 -6 4.9 5.1
 -7 -5 6 12.8 25.6
 -7 -5 6 1.9 6.7
 -7 -5 6 1 3.2
 -6 -5 6 349.07 61.89
 -6 -5 6 467.05 43.3
 5 5 -6 57.39 8.9
 -5 -5 6 51.09 7.4
 -5 -5 6 51.79 21.4
 -5 -5 6 50.09 8.2
 4 5 -6 1730.03 186.68
 -4 -5 6 2021.2 186.18
 -4 -5 6 2063.89 186.88
 3 5 -6 27.7 6.2
 -3 -5 6 25.6 12.1
 -3 -5 6 30 6.8
 -3 -5 6 30.1 5.6
 -3 -5 6 31.4 5.3
 2 5 -6 1487.05 160.48
 -2 -5 6 1720.13 163.28
 -2 -5 6 1597.94 159.78
 -2 -5 6 1935.21 162.78
 -2 -5 6 1554.94 160.08
 1 5 -6 597.14 64.89
 1 5 -6 772.72 79.39
 -1 -5 6 664.83 64.09
 -1 -5 6 623.84 68.39
 0 5 -6 292.87 45.5
 0 5 -6 307.37 34.9
 0 -5 6 368.36 40.5
 0 -5 6 347.97 34.1
 0 -5 6 359.56 34.3
 -1 5 -6 380.86 55.19
 1 -5 6 456.95 43.1
 1 -5 6 420.56 42.6
 1 -5 6 461.15 50.59
 -2 5 -6 6.6 10.9
 -2 5 -6 6.2 5.7
 2 -5 6 6.2 7.5
 2 -5 6 5.1 2.5
 2 -5 6 7.5 2.7
 -3 5 -6 49.8 19.6
 -3 5 -6 39 14.2
 3 -5 6 52.59 7.3
 3 -5 6 55.49 15.1
 3 -5 6 44.7 6.3
 -4 5 -6 80.29 24.2
 -4 5 -6 84.49 10.4
 -4 5 -6 92.59 26.1
 4 -5 6 74.59 10
 4 -5 6 117.29 22.3
 4 -5 6 94.89 11.1
 4 -5 6 82.99 10.7
 -5 5 -6 482.85 44.8
 -5 5 -6 403.66 62.79
 -5 5 -6 408.56 63.69
 5 -5 6 402.36 45.1
 5 -5 6 456.95 44.7
 5 -5 6 512.85 45.6
 -6 5 -6 175.88 18.3
 -6 5 -6 140.69 37.9
 -6 5 -6 111.09 40.7
 6 -5 6 177.88 18.9
 6 -5 6 217.88 34.5
 6 -5 6 147.39 18
 6 -5 6 153.08 18.6
 -7 5 -6 687.83 107.49
 -7 5 -6 866.61 77.99
 -7 5 -6 701.73 103.19
 7 -5 6 693.73 78.09
 7 -5 6 924.81 78.49
 -8 5 -6 253.47 61.39
 -8 5 -6 191.88 71.19
 -8 5 -6 274.47 31.1
 8 -5 6 401.76 55.39
 8 -5 6 317.27 31.3
 8 -5 6 238.88 30.9
 8 4 -6 46.3 8.2
 8 4 -6 60.79 14.5
 -8 -4 6 36.6 8
 -8 -4 6 28.3 34.4
 -8 -4 6 44.4 9.7
 7 4 -6 63.09 9.2
 7 4 -6 57.09 12.1
 -7 -4 6 52.39 9.6
 -7 -4 6 58.49 7.5
 -7 -4 6 26.3 24.9
 -7 -4 6 65.69 11.6
 6 4 -6 110.99 16.6
 6 4 -6 112.99 13.4
 -6 -4 6 126.19 14.6
 -6 -4 6 98.19 34.7
 -6 -4 6 111.69 12.5
 -6 -4 6 107.59 13.7
 5 4 -6 904.71 83.59
 -5 -4 6 831.62 83.69
 -5 -4 6 837.42 82.79
 4 4 -6 359.46 35.7
 -4 -4 6 330.87 35
 -4 -4 6 374.06 35.8
 3 4 -6 2741.63 260.47
 -3 -4 6 2735.53 260.37
 -3 -4 6 2864.71 259.97
 -3 -4 6 2554.24 261.07
 2 4 -6 94.29 19.5
 2 4 -6 63.79 8
 -2 -4 6 63.49 11.6
 -2 -4 6 53.39 7
 -2 -4 6 48.6 7.1
 -2 -4 6 51.49 9
 1 4 -6 2449.05 246.18
 -1 -4 6 2730.23 250.57
 -1 -4 6 2623.14 245.58
 -1 -4 6 2477.25 245.88
 0 4 -6 184.98 21.5
 0 4 -6 210.38 31.9
 0 -4 6 214.98 26.8
 0 -4 6 201.68 20.9
 -1 4 -6 285.57 32.1
 -1 4 -6 259.47 40.8
 1 -4 6 320.27 30.3
 1 -4 6 317.77 31
 1 -4 6 359.56 38.9
 -2 4 -6 264.17 41.4
 -2 4 -6 305.37 36
 2 -4 6 327.37 39.1
 2 -4 6 295.97 29.7
 -3 4 -6 19.8 13.2
 -3 4 -6 10 10
 -3 4 -6 13.8 3
 3 -4 6 10.8 3.4
 3 -4 6 23 11
 3 -4 6 15.1 3.3
 -4 4 -6 191.08 36.6
 -4 4 -6 202.48 36.9
 -4 4 -6 235.38 22.9
 4 -4 6 259.27 24
 4 -4 6 189.88 23.2
 4 -4 6 280.87 36
 4 -4 6 227.48 22.9
 -5 4 -6 6.9 14.4
 -5 4 -6 14.3 14.2
 -5 4 -6 13.5 3.8
 5 -4 6 18.4 4.4
 5 -4 6 15 4.2
 5 -4 6 13.7 4
 5 -4 6 11.6 9
 -6 4 -6 961.6 128.09
 -6 4 -6 1351.26 110.09
 -6 4 -6 1137.89 136.19
 6 -4 6 1035.9 110.09
 -7 4 -6 -1.1 22.1
 -7 4 -6 35.9 7.4
 -7 4 -6 13.6 19.6
 7 -4 6 22.1 5.8
 7 -4 6 29.8 16.2
 7 -4 6 28.2 6.6
 -8 4 -6 642.94 97.69
 -8 4 -6 772.52 113.79
 8 -4 6 771.02 74.29
 -9 4 -6 65.09 52.89
 -9 4 -6 162.08 22.5
 9 -4 6 209.28 43.5
 9 -4 6 166.18 21
 9 3 -6 135.39 22.9
 9 3 -6 145.39 15.8
 -9 -3 6 58.49 45.5
 8 3 -6 10.1 9.1
 8 3 -6 11.4 4.6
 -8 -3 6 6.3 6.8
 -8 -3 6 4.2 29.7
 -8 -3 6 7.1 4.8
 7 3 -6 5.1 3.5
 7 3 -6 2.2 6.7
 -7 -3 6 -3.9 4.4
 -7 -3 6 -2.6 3.1
 6 3 -6 69.49 9.3
 6 3 -6 75.29 12.4
 -6 -3 6 81.09 8.7
 -6 -3 6 83.19 11.1
 -6 -3 6 65.99 10.1
 5 3 -6 325.97 39.4
 5 3 -6 430.06 37.9
 -5 -3 6 382.36 38.4
 -5 -3 6 368.96 37.2
 -5 -3 6 379.86 38.6
 4 3 -6 604.54 65.69
 4 3 -6 655.53 64.39
 -4 -3 6 669.63 64.79
 -4 -3 6 701.33 64.09
 3 3 -6 1151.08 113.09
 -3 -3 6 1082.89 113.09
 -3 -3 6 1212.48 112.79
 -3 -3 6 1242.08 114.79
 2 3 -6 2702.33 293.87
 -2 -3 6 2837.92 293.47
 -2 -3 6 3321.87 293.97
 -2 -3 6 3449.55 297.77
 1 3 -6 124.89 13.6
 1 3 -6 179.68 25
 -1 -3 6 114.59 14.9
 -1 -3 6 118.19 13.1
 -1 -3 6 128.09 18.3
 0 3 -6 3606.64 344.87
 0 -3 6 3370.76 339.37
 0 -3 6 3031.5 332.97
 0 -3 6 3968 336.67
 -1 3 -6 156.58 27.9
 -1 3 -6 187.38 22.3
 1 -3 6 187.48 18.5
 1 -3 6 185.28 19.2
 1 -3 6 213.88 27.1
 -2 3 -6 98.09 17.4
 -2 3 -6 87.99 19.7
 2 -3 6 103.59 11.1
 2 -3 6 92.39 10
 2 -3 6 128.49 19.9
 -3 3 -6 9.8 9.4
 -3 3 -6 5.3 7.4
 -3 3 -6 9.1 2.2
 3 -3 6 12.2 8.6
 3 -3 6 9 2.5
 3 -3 6 10.8 2.3
 3 -3 6 9.8 3.1
 -4 3 -6 562.44 50.19
 -4 3 -6 443.56 62.99
 -4 3 -6 516.25 66.49
 4 -3 6 496.95 50.59
 4 -3 6 522.25 50.09
 -5 3 -6 859.31 75.19
 -5 3 -6 711.93 94.69
 5 -3 6 718.93 75.39
 -6 3 -6 276.87 48.8
 -6 3 -6 318.47 56.59
 6 -3 6 329.57 32.5
 -7 3 -6 784.32 103.59
 -7 3 -6 971.5 118.79
 7 -3 6 866.01 85.29
 -8 3 -6 10.7 17
 -8 3 -6 48.9 36.5
 -8 3 -6 27.1 8.3
 8 -3 6 55.19 22.3
 8 -3 6 20.6 7.5
 -9 3 -6 725.63 62.39
 -9 3 -6 480.75 84.19
 -9 3 -6 577.54 105.99
 9 -3 6 576.14 61.79
 9 2 -6 142.79 22.2
 -9 -2 6 128.59 17
 -9 -2 6 142.59 19
 -9 -2 6 124.89 51.69
 8 2 -6 67.99 8.8
 8 2 -6 68.69 13.9
 -8 -2 6 67.09 10.6
 -8 -2 6 77.79 12.2
 7 2 -6 10.4 3.2
 7 2 -6 8 5.8
 -7 -2 6 10.5 5.3
 -7 -2 6 18.1 5
 6 2 -6 20.7 3.8
 6 2 -6 18.5 5.9
 -6 -2 6 33.2 5.6
 -6 -2 6 10.9 4.3
 5 2 -6 43.6 5.7
 5 2 -6 33.9 7.3
 -5 -2 6 45.5 5.2
 -5 -2 6 42.6 7
 -5 -2 6 42.5 6.7
 4 2 -6 1074.89 108.49
 4 2 -6 1189.88 107.09
 -4 -2 6 1063.99 107.59
 -4 -2 6 1076.79 106.69
 -4 -2 6 1133.99 107.79
 -4 -2 6 1156.98 107.69
 3 2 -6 1172.78 116.39
 3 2 -6 1362.26 117.79
 -3 -2 6 1277.17 116.89
 -3 -2 6 1042 118.89
 -3 -2 6 1217.68 116.89
 -3 -2 6 1245.28 116.19
 2 2 -6 2829.32 273.47
 -2 -2 6 2898.01 273.17
 -2 -2 6 2869.71 277.47
 -1 -2 6 2426.36 268.07
 -1 -2 6 2936.41 271.27
 -1 -2 6 2924.11 274.07
 -1 -2 6 2973.7 268.17
 0 2 -6 1278.27 122.39
 0 -2 6 1217.68 119.89
 0 -2 6 1287.57 123.09
 0 -2 6 1210.98 127.99
 -1 2 -6 2382.76 262.07
 -1 2 -6 2670.03 257.07
 1 -2 6 3006 262.37
 1 -2 6 2551.34 251.87
 -2 2 -6 604.64 76.79
 2 -2 6 687.53 73.59
 2 -2 6 534.25 66.59
 -3 2 -6 1.9 4.5
 -3 2 -6 8.9 8.6
 -3 2 -6 1.9 1.3
 3 -2 6 1.1 5.2
 3 -2 6 -0.2 0.9
 3 -2 6 2.7 1.8
 -4 2 -6 2 6.7
 -4 2 -6 3.2 2.4
 -4 2 -6 7.7 10
 4 -2 6 3 6.7
 4 -2 6 2 1.4
 -5 2 -6 660.83 83.09
 -5 2 -6 840.02 93.19
 5 -2 6 686.53 69.89
 -6 2 -6 276.67 51.59
 -6 2 -6 237.68 40.8
 6 -2 6 277.77 28.3
 -7 2 -6 658.13 93.79
 -7 2 -6 709.13 99.69
 7 -2 6 744.83 70.99
 -8 2 -6 298.17 53.39
 -8 2 -6 347.67 71.29
 8 -2 6 378.06 37.3
 -9 2 -6 160.08 18.2
 -9 2 -6 81.79 31.1
 9 -2 6 91.49 16.3
 9 1 -6 34.6 10.7
 -9 -1 6 26 7
 -9 -1 6 11.3 7.7
 8 1 -6 132.19 18.6
 -8 -1 6 123.49 21.1
 -8 -1 6 154.68 16.6
 -8 -1 6 137.89 17.6
 7 1 -6 25.2 8
 7 1 -6 45.4 5.1
 -7 -1 6 33.7 6.9
 -7 -1 6 35.8 8
 -7 -1 6 34.9 10.8
 6 1 -6 26.5 3.9
 6 1 -6 20.2 5.5
 -6 -1 6 26.4 6.2
 -6 -1 6 36.1 5.9
 -6 -1 6 28 8.5
 5 1 -6 650.23 55.09
 5 1 -6 513.05 56.89
 -5 -1 6 537.55 57.79
 -5 -1 6 541.15 56.09
 -5 -1 6 596.44 56.59
 4 1 -6 7.8 1.8
 4 1 -6 1.4 2.2
 -4 -1 6 7 3.6
 -4 -1 6 7.4 1.3
 -4 -1 6 13.1 3
 -4 -1 6 7.6 2.8
 3 1 -6 3163.18 297.27
 3 1 -6 3177.18 296.17
 -3 -1 6 3152.78 296.77
 -3 -1 6 2760.42 296.87
 -3 -1 6 3287.27 296.07
 2 1 -6 205.68 20.5
 -2 -1 6 209.48 19.7
 -2 -1 6 191.48 20.2
 -2 -1 6 194.38 20
 -1 -1 6 9999 841.22
 -1 -1 6 7896.41 835.12
 -1 -1 6 8484.35 838.72
 0 1 -6 1179.38 119.89
 0 -1 6 1173.78 119.99
 0 -1 6 1309.67 123.59
 -1 1 -6 8010.5 748.83
 -1 1 -6 7533.75 744.03
 -2 1 -6 720.63 78.29
 2 -1 6 724.33 69.49
 -3 1 -6 49.6 16.3
 -3 1 -6 51.89 5.7
 -3 1 -6 54.49 14.6
 3 -1 6 78.09 17
 3 -1 6 68.89 23.4
 3 -1 6 36.2 5.7
 -4 1 -6 110.39 21.5
 -4 1 -6 102.89 25.4
 -4 1 -6 123.19 13
 -4 1 -6 125.19 12.5
 4 -1 6 99.79 12.2
 -5 1 -6 99.79 22.6
 -5 1 -6 114.99 30.1
 -5 1 -6 117.99 13.1
 -5 1 -6 125.39 13.4
 5 -1 6 173.28 26.6
 5 -1 6 94.49 12.9
 -6 1 -6 1480.75 121.99
 -6 1 -6 1350.96 121.89
 -6 1 -6 1136.09 134.29
 -6 1 -6 1140.19 144.29
 6 -1 6 1125.39 121.59
 -7 1 -6 130.99 44
 -7 1 -6 225.98 23.8
 -7 1 -6 236.98 24
 7 -1 6 294.77 37.5
 7 -1 6 179.98 23.6
 -8 1 -6 693.53 108.89
 -8 1 -6 857.81 78.49
 8 -1 6 766.62 78.79
 -9 1 -6 238.28 27.7
 9 -1 6 188.78 27.7
 9 -1 6 226.48 25.3
 9 -1 6 314.17 41.6
 -10 1 -6 282.07 34.8
 10 -1 6 315.07 32.3
 9 0 -6 735.03 68.89
 -9 0 6 640.34 59.69
 -9 0 6 488.55 66.39
 8 0 -6 151.78 17.9
 -8 0 6 120.69 16.5
 -8 0 6 130.69 15.6
 -8 0 6 108.49 22.8
 7 0 -6 145.49 17.6
 -7 0 6 160.98 16.4
 -7 0 6 136.89 21.8
 -7 0 6 114.49 16.4
 6 0 -6 70.79 12.4
 -6 0 6 65.79 8.3
 -6 0 6 44.9 11.4
 -6 0 6 70.09 13.6
 5 0 -6 333.77 35.8
 -5 0 6 365.16 35.2
 -5 0 6 333.17 38.4
 -5 0 6 373.06 35.8
 4 0 -6 1243.48 116.49
 -4 0 6 1196.48 115.89
 -4 0 6 1176.68 118.79
 3 0 -6 1186.98 121.49
 3 0 -6 1316.47 121.19
 -3 0 6 1285.57 120.79
 -3 0 6 1240.58 121.19
 2 0 -6 3422.16 331.97
 2 0 -6 3273.07 332.47
 -2 0 6 3545.15 331.77
 -2 0 6 3838.62 331.27
 -2 0 6 3315.27 332.17
 1 0 -6 84.79 8.5
 1 0 -6 84.89 9
 -1 0 6 67.99 8.7
 -1 0 6 91.79 8.4
 -1 0 6 80.29 12.2
 0 0 -6 4024.9 360.96
 0 0 -6 3803.92 355.96
 0 0 6 3522.35 360.16
 0 0 6 3615.84 355.86
 -1 0 -6 5.5 1.2
 -1 0 -6 13.2 6.3
 1 0 6 5.1 5.3
 1 0 6 6 1.1
 1 0 6 11.7 5.6
 -2 0 -6 862.51 74.49
 -2 0 -6 776.12 83.69
 -2 0 -6 755.12 82.89
 2 0 6 705.53 74.39
 -3 0 -6 37.6 14.3
 -3 0 -6 35.7 4.7
 -3 0 -6 31.7 10.9
 3 0 6 56.29 21.9
 3 0 6 32.8 4.8
 3 0 6 59.89 15.7
 -4 0 -6 38.2 14.1
 -4 0 -6 47.6 19.3
 -4 0 -6 47.9 6
 4 0 6 71.79 17.7
 4 0 6 35.3 5.8
 -5 0 -6 476.45 41.9
 -5 0 -6 360.46 50.59
 -5 0 -6 426.66 60.89
 5 0 6 408.76 42.2
 -6 0 -6 120.59 13.2
 -6 0 -6 133.49 13.4
 -6 0 -6 86.99 21.6
 -6 0 -6 86.59 30.9
 6 0 6 99.59 13.3
 -7 0 -6 1730.83 150.18
 -7 0 -6 1748.63 150.08
 -7 0 -6 1367.36 174.98
 7 0 6 1336.67 150.18
 7 0 6 1509.65 148.89
 -8 0 -6 4.4 12.5
 -8 0 -6 2.4 24
 -8 0 -6 9.1 4.3
 -8 0 -6 3.7 4.9
 8 0 6 11 11.6
 8 0 6 3.7 3.6
 8 0 6 12.3 6.4
 -9 0 -6 1209.28 120.29
 -9 0 -6 1263.77 120.39
 9 0 6 1061.99 120.89
 9 0 6 1341.77 118.99
 -10 0 -6 18.4 21.4
 -10 0 -6 32.6 11.6
 10 0 6 50.39 19.3
 10 0 6 37.8 8.1
 9 -1 -6 134.29 23
 -9 1 6 158.58 32.9
 -9 1 6 182.28 22.4
 -9 1 6 175.98 21.8
 8 -1 -6 778.72 70.69
 -8 1 6 557.34 76.29
 -8 1 6 709.73 69.69
 -8 1 6 752.92 68.99
 7 -1 -6 99.89 13.6
 -7 1 6 113.99 13.9
 -7 1 6 83.59 19
 -7 1 6 107.59 12.6
 6 -1 -6 27.4 6.3
 -6 1 6 26.4 9.9
 -6 1 6 26.5 5.5
 5 -1 -6 242.78 24.8
 5 -1 -6 194.48 23.6
 -5 1 6 258.37 24.4
 -5 1 6 208.68 27.9
 -5 1 6 240.28 23.5
 4 -1 -6 1807.12 169.18
 4 -1 -6 1717.83 169.88
 -4 1 6 1754.42 168.78
 -4 1 6 1772.42 169.38
 -4 1 6 1751.22 173.18
 3 -1 -6 564.14 59.19
 3 -1 -6 615.04 58.59
 -3 1 6 619.34 58.29
 2 -1 -6 2473.55 246.28
 2 -1 -6 2683.73 245.68
 -2 1 6 2523.25 245.58
 -2 1 6 2625.04 246.28
 1 -1 -6 868.31 94.29
 1 -1 -6 935.91 93.29
 -1 1 6 1024.1 93.99
 -1 1 6 1022 93.29
 -1 1 6 1026.8 93.29
 0 -1 -6 228.48 29
 0 -1 -6 260.57 24.8
 0 1 6 266.67 29.6
 0 1 6 251.77 24.7
 -1 -1 -6 1401.56 138.59
 -1 -1 -6 1621.24 149.79
 -1 -1 -6 1457.55 138.99
 1 1 6 1456.75 145.29
 1 1 6 1378.66 138.59
 -2 -1 -6 63.99 7.5
 -2 -1 -6 67.49 14.9
 2 1 6 99.69 16.3
 2 1 6 66.39 7.7
 2 1 6 94.09 18.4
 -3 -1 -6 684.73 64.49
 -3 -1 -6 702.23 78.09
 3 1 6 622.24 64.59
 -4 -1 -6 41.4 12.3
 -4 -1 -6 53.69 6.8
 -4 -1 -6 45.4 18.9
 4 1 6 105.69 31
 4 1 6 46.1 7
 4 1 6 87.19 18.8
 4 1 6 53.79 6.6
 -5 -1 -6 173.38 16
 -5 -1 -6 109.59 28.7
 -5 -1 -6 110.99 21.8
 5 1 6 124.29 16
 5 1 6 180.28 15.6
 -6 -1 -6 768.52 67.69
 -6 -1 -6 542.25 85.39
 -6 -1 -6 766.32 67.49
 6 1 6 600.34 67.79
 6 1 6 693.53 66.79
 -7 -1 -6 354.06 36.1
 -7 -1 -6 252.97 55.89
 -7 -1 -6 404.56 36.4
 7 1 6 379.26 35.3
 7 1 6 303.87 36.5
 -8 -1 -6 974.3 112.19
 -8 -1 -6 964 131.59
 8 1 6 1187.98 104.29
 -9 -1 -6 191.18 22.4
 -9 -1 -6 180.38 21.5
 -9 -1 -6 84.69 43.5
 9 1 6 198.48 20.4
 9 1 6 217.28 30.3
 9 1 6 148.89 23
 -10 -1 -6 654.73 65.99
 10 1 6 710.23 63.59
 10 1 6 556.14 71.09
 9 -2 -6 311.97 39.3
 -9 2 6 236.28 43.6
 -9 2 6 264.17 28.9
 8 -2 -6 152.38 19.3
 -8 2 6 138.79 19
 -8 2 6 164.78 18.3
 -8 2 6 145.49 32.8
 7 -2 -6 19.6 6
 -7 2 6 21.6 11.8
 -7 2 6 21.2 5.6
 -7 2 6 28.2 6
 6 -2 -6 -0.4 2.7
 6 -2 -6 -1.1 4.2
 -6 2 6 -1.6 5.6
 -6 2 6 1.5 2.6
 -6 2 6 3.8 3.4
 5 -2 -6 111.49 14.3
 5 -2 -6 107.19 15.2
 -5 2 6 166.58 14.8
 -5 2 6 136.49 15.3
 -5 2 6 122.49 20.2
 4 -2 -6 126.49 12.8
 4 -2 -6 88.99 13.1
 -4 2 6 106.99 17.3
 -4 2 6 119.59 13.4
 -4 2 6 127.79 12.7
 3 -2 -6 3914.21 374.36
 3 -2 -6 3536.95 376.06
 3 -2 -6 4108.89 375.36
 -3 2 6 4114.19 376.16
 -3 2 6 4008.7 375.36
 -3 2 6 3943.11 380.86
 2 -2 -6 596.14 55.59
 2 -2 -6 569.64 56.99
 2 -2 -6 563.34 56.09
 -2 2 6 600.54 55.69
 -2 2 6 570.24 56.79
 1 -2 -6 2502.75 236.58
 1 -2 -6 2552.94 235.78
 1 -2 -6 2554.94 235.68
 -1 2 6 2397.26 241.38
 -1 2 6 2348.86 236.38
 -1 2 6 2489.65 235.78
 0 -2 -6 1443.76 139.39
 0 -2 -6 1419.16 133.89
 0 -2 -6 1395.16 133.39
 0 2 6 1335.57 133.39
 -1 -2 -6 1819.32 188.68
 -1 -2 -6 2004.4 181.88
 -1 -2 -6 1918.41 182.28
 -1 -2 -6 1977.3 181.78
 1 2 6 1987.5 189.78
 1 2 6 1727.53 181.88
 -2 -2 -6 2097.49 189.88
 -2 -2 -6 2110.69 200.48
 2 2 6 1807.62 189.88
 2 2 6 1950.5 189.88
 -3 -2 -6 28.5 4.5
 -3 -2 -6 29.7 12.8
 3 2 6 47.2 22.4
 3 2 6 30.8 4.6
 3 2 6 60.99 21
 3 2 6 28.8 4.4
 -4 -2 -6 114.19 11.8
 -4 -2 -6 90.09 24
 4 2 6 90.69 11.8
 4 2 6 111.89 11.6
 -5 -2 -6 1.6 2.2
 -5 -2 -6 1.7 10.2
 5 2 6 4.2 2.1
 5 2 6 6 3.5
 5 2 6 0.9 7.3
 -6 -2 -6 798.02 72.49
 6 2 6 685.13 72.99
 6 2 6 719.33 71.69
 -7 -2 -6 221.98 22.5
 7 2 6 197.78 21.5
 7 2 6 185.98 23.3
 -8 -2 -6 641.04 61.99
 -8 -2 -6 682.33 62.19
 8 2 6 549.35 63.09
 8 2 6 588.24 60.89
 -9 -2 -6 654.03 65.29
 9 2 6 601.94 63.59
 9 2 6 499.85 66.59
 9 2 6 759.92 70.29
 9 -3 -6 482.05 51.69
 -9 3 6 503.65 51.79
 -9 3 6 471.85 68.19
 8 -3 -6 25.1 7.7
 -8 3 6 19.3 7.7
 -8 3 6 32 18.6
 7 -3 -6 126.59 18.3
 7 -3 -6 140.09 17.3
 -7 3 6 145.59 27.9
 -7 3 6 151.88 18
 6 -3 -6 46 8
 6 -3 -6 46.8 9.5
 -6 3 6 68.39 9.5
 -6 3 6 41.3 15.5
 5 -3 -6 90.39 11.9
 5 -3 -6 108.29 10.2
 5 -3 -6 89.89 13
 -5 3 6 85.89 18.3
 -5 3 6 116.19 13.1
 4 -3 -6 427.26 46.9
 4 -3 -6 469.25 44.9
 4 -3 -6 462.35 46.1
 -4 3 6 462.95 53.39
 -4 3 6 515.55 47.1
 3 -3 -6 84.39 9
 3 -3 -6 87.79 10.7
 3 -3 -6 89.39 9.8
 -3 3 6 82.49 15.2
 -3 3 6 97.39 10.7
 -3 3 6 87.99 9.2
 2 -3 -6 3423.76 322.57
 2 -3 -6 3563.64 322.27
 2 -3 -6 3437.96 323.47
 -2 3 6 3283.97 329.27
 -2 3 6 3091.19 322.27
 -2 3 6 3540.65 329.07
 -2 3 6 3359.56 323.27
 1 -3 -6 323.37 31.2
 -1 3 6 301.37 36.2
 -1 3 6 311.37 31.1
 -1 3 6 306.97 30.4
 0 -3 -6 4397.26 421.06
 0 -3 -6 4211.38 414.76
 0 -3 -6 4451.75 415.46
 0 3 6 4444.06 421.26
 0 3 6 4410.56 415.46
 0 3 6 4231.38 414.86
 -1 -3 -6 1028.3 106.99
 -1 -3 -6 1186.98 106.59
 -1 -3 -6 1155.08 114.19
 -1 -3 -6 1053.29 106.49
 1 3 6 1167.78 114.29
 1 3 6 1077.89 106.59
 -2 -3 -6 1765.82 175.38
 -2 -3 -6 1875.91 175.48
 -2 -3 -6 2003.4 186.58
 2 3 6 1767.92 175.38
 2 3 6 1778.92 175.48
 -3 -3 -6 237.88 21.4
 -3 -3 -6 204.88 20.9
 -3 -3 -6 207.18 32.2
 3 3 6 198.18 21.1
 3 3 6 183.48 21.1
 -4 -3 -6 17.7 13.6
 -4 -3 -6 31.7 5.4
 4 3 6 27.7 5.4
 4 3 6 21.8 4.6
 4 3 6 62.69 27.2
 4 3 6 52.79 14.7
 -5 -3 -6 183.78 17.9
 5 3 6 142.39 17.9
 5 3 6 152.98 17.1
 -6 -3 -6 72.09 28.2
 -6 -3 -6 146.49 14.5
 6 3 6 108.89 14.8
 6 3 6 118.59 13.5
 7 3 6 617.24 64.39
 7 3 6 645.24 63.39
 -8 -3 -6 -1 22.6
 -8 -3 -6 12 5
 8 3 6 1.9 7.1
 8 3 6 12.5 4.5
 8 3 6 10.3 7.2
 -9 -3 -6 721.53 72.89
 -9 -3 -6 791.12 73.09
 9 3 6 619.24 74.59
 9 3 6 741.53 71.79
 8 -4 -6 409.96 44.7
 8 -4 -6 418.76 43.4
 -8 4 6 374.76 58.49
 -8 4 6 420.36 43.8
 7 -4 -6 6.6 4.7
 7 -4 -6 11.5 2.3
 7 -4 -6 12.7 7.2
 -7 4 6 11.5 6.1
 -7 4 6 8.6 12.8
 6 -4 -6 46.2 8
 6 -4 -6 51.09 9.7
 -6 4 6 52.79 18.9
 -6 4 6 40.2 8.7
 5 -4 -6 21.4 4.8
 5 -4 -6 36.9 7.2
 5 -4 -6 19.2 3.4
 -5 4 6 15.2 5.5
 -5 4 6 18.5 10.9
 4 -4 -6 405.76 39.3
 4 -4 -6 413.56 38.3
 4 -4 -6 351.06 40
 -4 4 6 359.46 47.4
 -4 4 6 419.46 40.3
 3 -4 -6 652.53 60.49
 3 -4 -6 604.44 59.69
 3 -4 -6 628.54 61.39
 -3 4 6 553.44 59.79
 -3 4 6 626.94 68.59
 -3 4 6 666.83 61.19
 2 -4 -6 636.04 67.29
 2 -4 -6 713.83 66.29
 -2 4 6 684.13 66.39
 -2 4 6 663.43 73.69
 -2 4 6 768.32 67.49
 -2 4 6 650.93 73.39
 1 -4 -6 3656.63 369.96
 1 -4 -6 3754.12 369.16
 -1 4 6 3803.02 376.16
 -1 4 6 4036.7 370.16
 -1 4 6 4130.79 376.46
 -1 4 6 3878.31 369.46
 0 -4 -6 367.46 34.2
 0 -4 -6 340.27 34.9
 0 -4 -6 352.16 40.4
 0 4 6 339.07 34.3
 0 4 6 311.17 40.1
 0 4 6 369.36 35
 -1 -4 -6 3369.16 338.87
 -1 -4 -6 3462.05 331.57
 -1 -4 -6 3396.36 331.47
 -1 -4 -6 3496.45 332.27
 1 4 6 3784.32 340.67
 1 4 6 3357.86 331.67
 -2 -4 -6 35.3 5.6
 -2 -4 -6 20.1 4.3
 -2 -4 -6 27.5 4.2
 -2 -4 -6 23 10.3
 2 4 6 31.7 14.9
 2 4 6 22.3 4.3
 -3 -4 -6 1224.58 139.29
 -3 -4 -6 1401.06 127.49
 -3 -4 -6 1378.76 127.79
 3 4 6 1279.17 127.59
 -4 -4 -6 24.4 13.1
 -4 -4 -6 29.4 5.1
 -4 -4 -6 38.2 5.8
 4 4 6 22.2 5.2
 4 4 6 28.5 5.3
 4 4 6 57.79 15.5
 4 4 6 36.1 21
 -5 -4 -6 15.5 4.6
 -5 -4 -6 13.1 13.4
 5 4 6 15.3 4.4
 5 4 6 13.5 5.1
 5 4 6 19.7 12.8
 -6 -4 -6 132.89 34.3
 6 4 6 174.98 19.6
 -7 -4 -6 138.49 16.6
 7 4 6 108.59 17.8
 7 4 6 105.69 15.5
 7 4 6 157.88 18.5
 -8 -4 -6 725.43 65.19
 8 4 6 603.94 63.89
 8 4 6 597.74 66.79
 -9 -4 -6 23.1 7.6
 -9 -4 -6 32.5 8.6
 -9 -4 -6 -3.5 28.9
 9 4 6 29.7 7.6
 9 4 6 19 10.8
 8 -5 -6 147.99 26.6
 8 -5 -6 152.98 22.9
 -8 5 6 217.88 24.7
 -8 5 6 155.98 41.3
 7 -5 -6 272.47 32.4
 7 -5 -6 267.97 30.8
 7 -5 -6 302.97 28
 -7 5 6 333.77 32.9
 -7 5 6 206.78 44.5
 6 -5 -6 2.7 5.4
 6 -5 -6 7.2 4.7
 6 -5 -6 6.3 2.7
 -6 5 6 2.1 11
 -6 5 6 3 5.9
 5 -5 -6 44.9 9.3
 5 -5 -6 52.19 6.1
 5 -5 -6 41.9 8.2
 -5 5 6 34.4 7.9
 -5 5 6 35.3 17
 4 -5 -6 31.1 5.9
 4 -5 -6 30.1 4.9
 4 -5 -6 35.3 7.3
 -4 5 6 37.7 7.2
 -4 5 6 37.7 15.9
 3 -5 -6 965.9 89.79
 3 -5 -6 896.41 90.59
 3 -5 -6 950.6 89.19
 -3 5 6 868.31 99.09
 -3 5 6 936.61 98.99
 -3 5 6 976.6 90.79
 -3 5 6 874.81 89.49
 2 -5 -6 543.75 55.29
 2 -5 -6 613.94 54.19
 -2 5 6 490.35 54.29
 -2 5 6 593.24 55.49
 -2 5 6 551.74 62.99
 -2 5 6 542.85 62.19
 1 -5 -6 2653.13 273.87
 1 -5 -6 2887.81 273.07
 -1 5 6 2877.31 280.87
 -1 5 6 2811.92 280.87
 -1 5 6 3181.98 274.47
 -1 5 6 2758.92 273.37
 0 -5 -6 2884.21 281.57
 0 -5 -6 2957.3 280.77
 0 5 6 2819.52 281.07
 0 5 6 3038.3 287.87
 0 5 6 2997.6 288.77
 -1 -5 -6 943.31 105.69
 -1 -5 -6 1034.6 99.29
 -1 -5 -6 946.51 99.99
 -1 -5 -6 1099.19 99.29
 1 5 6 951.4 99.39
 1 5 6 1189.48 109.89
 1 5 6 1038.3 104.99
 -2 -5 -6 1542.05 159.18
 -2 -5 -6 1590.64 151.18
 -2 -5 -6 1682.33 149.99
 -2 -5 -6 1628.14 150.18
 2 5 6 1354.36 149.88
 -3 -5 -6 136.69 14.6
 -3 -5 -6 144.39 26
 -3 -5 -6 126.39 14.8
 3 5 6 121.19 14.8
 -4 -5 -6 173.68 17.1
 -4 -5 -6 97.89 26.2
 -4 -5 -6 162.28 16.4
 4 5 6 126.49 16.3
 4 5 6 254.57 46.6
 -5 -5 -6 13.2 15
 -5 -5 -6 22 6.5
 -5 -5 -6 11.6 3.9
 5 5 6 12.6 4.3
 5 5 6 5.8 4.1
 5 5 6 45.9 16.2
 -6 -5 -6 133.39 14.1
 -6 -5 -6 54.89 24
 6 5 6 107.39 12.9
 6 5 6 96.09 14.4
 -7 -5 -6 281.07 27.8
 7 5 6 229.48 29
 7 5 6 228.08 26.5
 -8 -5 -6 382.76 41.7
 8 5 6 388.86 49.7
 8 5 6 341.37 38
 7 -6 -6 291.87 27.9
 7 -6 -6 256.07 32.4
 7 -6 -6 251.27 30.5
 -7 6 6 264.77 50.79
 -7 6 6 296.07 32.6
 6 -6 -6 72.59 13.5
 6 -6 -6 71.49 9.1
 6 -6 -6 70.89 11.3
 -6 6 6 73.59 13
 -6 6 6 75.19 26.2
 5 -6 -6 5.8 5.3
 5 -6 -6 19.1 5.5
 5 -6 -6 9.4 3.4
 -5 6 6 9.7 13
 -5 6 6 22.6 6.7
 4 -6 -6 109.49 15.3
 4 -6 -6 120.29 15
 4 -6 -6 124.09 13.2
 -4 6 6 119.19 25.2
 -4 6 6 123.19 25
 -4 6 6 106.19 15.3
 3 -6 -6 205.88 20.4
 3 -6 -6 188.58 20.9
 3 -6 -6 197.88 22.4
 -3 6 6 192.88 31.2
 -3 6 6 193.38 30.5
 -3 6 6 165.88 20.7
 -3 6 6 235.88 22.6
 2 -6 -6 2119.99 218.08
 2 -6 -6 2405.96 217.18
 -2 6 6 2173.08 217.58
 -2 6 6 2232.88 226.18
 -2 6 6 2200.28 227.98
 -2 6 6 2477.35 218.78
 1 -6 -6 251.67 25.2
 1 -6 -6 225.98 26.1
 -1 6 6 270.27 26.7
 -1 6 6 246.28 33.2
 -1 6 6 254.37 25.9
 -1 6 6 229.88 33.4
 0 -6 -6 2143.79 216.78
 0 -6 -6 2359.56 215.98
 0 6 6 2155.38 216.38
 0 6 6 2142.09 223.58
 0 6 6 2464.35 225.58
 -1 -6 -6 548.55 55.39
 -1 -6 -6 542.55 61.79
 -1 -6 -6 523.75 56.39
 -1 -6 -6 577.34 55.69
 1 6 6 691.23 68.29
 1 6 6 558.14 61.99
 1 6 6 523.05 55.79
 -2 -6 -6 243.28 22.8
 -2 -6 -6 237.38 22.3
 -2 -6 -6 193.48 29.8
 -2 -6 -6 208.48 23.8
 2 6 6 176.48 26.5
 2 6 6 216.18 22.8
 -3 -6 -6 164.88 23.6
 -3 -6 -6 223.48 21.8
 -3 -6 -6 191.48 31.2
 3 6 6 157.58 23.7
 3 6 6 214.38 25.8
 -4 -6 -6 64.19 10.7
 -4 -6 -6 80.29 9.6
 -4 -6 -6 69.29 22
 4 6 6 65.69 12.3
 4 6 6 61.29 9.8
 -5 -6 -6 10.7 14.2
 -5 -6 -6 16.5 4.9
 -5 -6 -6 8.8 4.6
 5 6 6 7.6 4.3
 5 6 6 17.3 12
 5 6 6 17.2 6.5
 -6 -6 -6 4.4 4
 -6 -6 -6 5.8 4.8
 -6 -6 -6 1.4 13.9
 6 6 6 5.8 4.9
 -7 -6 -6 419.56 39.9
 7 6 6 328.17 38.7
 -8 -6 -6 38.8 26.8
 -8 -6 -6 94.29 14.4
 8 6 6 99.49 17.7
 8 6 6 76.79 14.6
 7 -7 -6 36.8 9.8
 7 -7 -6 38 13.3
 7 -7 -6 36.4 6.9
 -7 7 6 22.5 25.1
 -7 7 6 47.3 12.3
 6 -7 -6 268.67 27.7
 6 -7 -6 240.88 29.7
 6 -7 -6 296.47 32.1
 -6 7 6 267.27 78.59
 -6 7 6 288.67 32
 5 -7 -6 -7.4 6.1
 5 -7 -6 3.8 3.5
 5 -7 -6 6.8 4.5
 -5 7 6 7.1 14.2
 -5 7 6 2.5 13
 -5 7 6 -2.6 5.9
 4 -7 -6 28.6 6.3
 4 -7 -6 37.9 6.4
 4 -7 -6 42.8 9.7
 -4 7 6 18.6 14.2
 -4 7 6 34.9 8.4
 -4 7 6 34.7 16.6
 3 -7 -6 297.07 33.2
 3 -7 -6 340.77 31.8
 -3 7 6 377.56 34.4
 -3 7 6 305.07 45.7
 -3 7 6 249.48 32.1
 -3 7 6 315.57 43.1
 2 -7 -6 491.85 42.3
 2 -7 -6 348.67 42.8
 -2 7 6 395.96 42.7
 -2 7 6 408.16 51.59
 -2 7 6 491.65 44.2
 -2 7 6 392.06 53.59
 1 -7 -6 1565.54 133.79
 1 -7 -6 1291.57 134.49
 -1 7 6 1255.77 134.19
 -1 7 6 1211.88 155.68
 -1 7 6 1535.85 143.99
 0 -7 -6 112.59 14.3
 0 -7 -6 120.49 14.9
 0 7 6 106.99 21.3
 0 7 6 132.39 24
 0 7 6 111.69 14.7
 -1 -7 -6 1208.38 116.69
 -1 -7 -6 1284.27 116.49
 -1 -7 -6 1196.48 117.79
 1 7 6 1163.78 117.19
 1 7 6 1150.08 124.19
 -2 -7 -6 53.69 8.3
 -2 -7 -6 51.89 10.7
 -2 -7 -6 49.9 14.8
 -2 -7 -6 76.19 13.5
 2 7 6 67.29 9.7
 2 7 6 48.8 13.6
 2 7 6 104.69 29.4
 -3 -7 -6 492.35 42.8
 -3 -7 -6 399.76 41.8
 -3 -7 -6 374.56 43.7
 -3 -7 -6 408.86 51.59
 3 7 6 382.86 42.6
 3 7 6 421.76 47.5
 -4 -7 -6 216.48 22.8
 -4 -7 -6 153.28 32.2
 -4 -7 -6 221.28 22.3
 4 7 6 222.48 26.9
 4 7 6 184.08 22.8
 -5 -7 -6 5.3 14.1
 -5 -7 -6 4.7 3.8
 -5 -7 -6 -1.2 4.3
 5 7 6 -3.6 4.3
 5 7 6 -2.3 6.1
 5 7 6 -0.5 11.7
 -6 -7 -6 20.3 7.3
 -6 -7 -6 27.9 6.5
 -6 -7 -6 7.4 16.3
 6 7 6 23.8 7.4
 -7 -7 -6 14.8 21.2
 -7 -7 -6 17 7.8
 7 7 6 12.9 7.4
 6 -8 -6 3.5 5.2
 6 -8 -6 -2 6.7
 6 -8 -6 -4.5 9.2
 -6 8 6 -3.8 21.5
 -6 8 6 -2.8 10
 5 -8 -6 28.6 6.8
 5 -8 -6 34.7 8.1
 5 -8 -6 42.2 11.5
 -5 8 6 24 21.5
 -5 8 6 52.79 11.5
 -5 8 6 42.9 21.9
 4 -8 -6 9.9 4.9
 4 -8 -6 4.4 4.3
 4 -8 -6 17.7 8.2
 -4 8 6 2.1 6.9
 -4 8 6 10.4 15.4
 3 -8 -6 324.97 31.3
 3 -8 -6 292.17 33
 -3 8 6 343.57 33.9
 -3 8 6 295.77 43.8
 -3 8 6 280.87 47.2
 -3 8 6 265.27 32.1
 2 -8 -6 130.79 19
 2 -8 -6 184.68 18.3
 -2 8 6 180.98 29.9
 -2 8 6 153.88 31.6
 -2 8 6 145.99 19.1
 1 -8 -6 834.42 88.79
 1 -8 -6 945.31 87.69
 -1 8 6 1016.6 99.29
 -1 8 6 774.52 88.39
 -1 8 6 899.71 101.19
 0 -8 -6 1107.89 113.19
 0 -8 -6 1136.49 111.69
 0 8 6 1077.79 112.69
 0 8 6 1369.66 125.19
 0 8 6 1062.29 122.49
 -1 -8 -6 113.59 14.4
 -1 -8 -6 111.79 16.4
 -1 -8 -6 119.29 14
 1 8 6 101.99 25.2
 1 8 6 142.99 33.4
 1 8 6 110.09 15.1
 -2 -8 -6 1368.96 124.39
 -2 -8 -6 1263.77 125.79
 -2 -8 -6 1287.87 123.69
 2 8 6 1177.38 124.59
 2 8 6 1264.17 132.19
 -3 -8 -6 19.3 8.4
 -3 -8 -6 21.5 6.1
 -3 -8 -6 12.1 10.7
 -3 -8 -6 18.2 5.4
 3 8 6 26.1 11.6
 3 8 6 15.8 6.2
 -4 -8 -6 212.18 29.4
 -4 -8 -6 294.67 28.3
 -4 -8 -6 215.38 36.5
 -4 -8 -6 258.27 27.4
 4 8 6 267.97 33.7
 4 8 6 259.87 28.9
 -5 -8 -6 14 15.9
 -5 -8 -6 21.3 7
 -5 -8 -6 18.4 10.8
 5 8 6 15.4 7.8
 5 8 6 31.1 11.9
 -6 -8 -6 8.4 19.1
 -6 -8 -6 12.7 7
 -6 -8 -6 10.5 5.7
 6 8 6 20.3 8.6
 4 -9 -6 13.6 16.1
 4 -9 -6 1.5 7.5
 4 -9 -6 1.1 5.1
 -4 9 6 -10.1 18.2
 -4 9 6 2.7 19.1
 -4 9 6 -4.7 8.7
 3 -9 -6 37 7.5
 3 -9 -6 19.6 9.2
 -3 9 6 39.5 19.2
 -3 9 6 26.6 40.3
 -3 9 6 40.4 9.5
 2 -9 -6 210.18 30.2
 2 -9 -6 300.97 28.9
 -2 9 6 269.87 40.8
 -2 9 6 259.47 30.6
 -2 9 6 303.67 48.9
 1 -9 -6 101.79 12.9
 1 -9 -6 104.69 15.9
 -1 9 6 104.49 26.3
 -1 9 6 60.59 13.2
 -1 9 6 88.79 27.1
 0 -9 -6 627.44 63.89
 0 -9 -6 681.63 61.99
 0 9 6 601.44 75.69
 0 9 6 554.04 63.09
 -1 -9 -6 869.11 87.69
 -1 -9 -6 879.61 85.39
 -1 -9 -6 896.31 86.09
 1 9 6 834.52 97.39
 1 9 6 854.41 86.99
 -2 -9 -6 379.86 43.6
 -2 -9 -6 418.96 41.6
 -2 -9 -6 379.76 40.6
 2 9 6 499.55 62.59
 2 9 6 384.96 51.69
 2 9 6 335.97 42.2
 -3 -9 -6 602.54 57.69
 -3 -9 -6 601.84 57.09
 -3 -9 -6 497.45 65.89
 3 9 6 532.55 66.09
 3 9 6 541.05 59.19
 -4 -9 -6 8.7 9.7
 -4 -9 -6 5.1 6.1
 -4 -9 -6 8.3 5.8
 -4 -9 -6 4.2 11.4
 4 9 6 9.3 12.8
 4 9 6 8.9 7.9
 -5 -9 -6 45.6 9.7
 -5 -9 -6 14.7 16.6
 5 9 6 -0.4 14.4
 2 -10 -6 39.1 11.7
 2 -10 -6 33.3 7.8
 -2 10 6 -3.8 18.7
 -2 10 6 46.5 27.4
 -2 10 6 34 10.7
 1 -10 -6 417.46 46.7
 1 -10 -6 442.76 43.9
 -1 10 6 399.26 46.4
 0 -10 -6 20.6 9.6
 0 -10 -6 19.7 7
 0 -10 -6 0.6 6.6
 0 10 6 9.1 18.3
 0 10 6 0.3 19.5
 0 10 6 8.6 8.4
 -1 -10 -6 1096.59 97.19
 -1 -10 -6 978.4 98.79
 -1 -10 -6 1068.39 96.19
 1 10 6 829.92 109.59
 1 10 6 879.51 97.99
 -2 -10 -6 274.67 29.8
 -2 -10 -6 235.98 32.8
 2 10 6 280.37 45.1
 2 10 6 213.18 32.8
 2 9 -7 378.86 44.8
 -2 -9 7 401.36 40.8
 -2 -9 7 383.16 42
 1 9 -7 455.45 72.69
 -1 -9 7 442.76 46.1
 -1 -9 7 461.45 46.7
 -1 -9 7 410.16 45
 0 9 -7 76.19 33.6
 0 -9 7 89.79 21.4
 0 -9 7 73.69 12.8
 0 -9 7 77.19 13.3
 -1 9 -7 440.66 77.19
 1 -9 7 581.24 52.59
 1 -9 7 472.65 51.79
 1 -9 7 528.45 62.39
 -2 9 -7 0 26.5
 2 -9 7 9.6 6.4
 2 -9 7 10 5.5
 -3 9 -7 171.38 55.29
 3 -9 7 176.58 21.6
 3 -9 7 208.28 36.6
 4 8 -7 16.9 11.1
 -4 -8 7 15.9 5.8
 -4 -8 7 10.6 6.1
 3 8 -7 464.25 50.59
 -3 -8 7 452.75 47.9
 -3 -8 7 508.95 49.2
 2 8 -7 16.1 21.6
 2 8 -7 20.5 9.2
 -2 -8 7 22.4 7.2
 -2 -8 7 28.9 7.8
 -2 -8 7 16.6 5.4
 1 8 -7 1672.73 170.18
 1 8 -7 1337.67 145.49
 -1 -8 7 1544.45 143.39
 -1 -8 7 1454.15 150.08
 -1 -8 7 1342.27 143.59
 -1 -8 7 1568.24 144.39
 0 8 -7 214.18 45.2
 0 -8 7 189.78 29.8
 0 -8 7 215.78 22.9
 0 -8 7 203.58 22.9
 -1 8 -7 424.36 69.09
 1 -8 7 441.76 46.6
 1 -8 7 463.75 55.79
 1 -8 7 510.65 47.3
 -2 8 -7 292.77 59.39
 2 -8 7 361.66 47.7
 2 -8 7 399.76 37.8
 2 -8 7 360.96 37
 -3 8 -7 8.7 22.7
 3 -8 7 0.3 4.9
 3 -8 7 3.2 11.3
 3 -8 7 8.4 5
 -4 8 -7 64.29 32
 4 -8 7 54.39 20.2
 4 -8 7 58.09 10.5
 4 -8 7 64.89 11.3
 -5 8 -7 -4.4 16
 -5 8 -7 9.8 28.7
 5 -8 7 5.1 5.8
 5 -8 7 3.5 6.2
 5 -8 7 5.4 6.1
 5 -8 7 0.9 15.5
 6 7 -7 83.79 14.7
 -6 -7 7 73.59 10.2
 -6 -7 7 37.3 20.8
 5 7 -7 6.8 6.7
 -5 -7 7 -2.4 8.4
 -5 -7 7 2 5.1
 -5 -7 7 -0.1 4
 -5 -7 7 0.7 11.2
 4 7 -7 143.49 19
 -4 -7 7 148.49 16.2
 -4 -7 7 124.89 16.6
 3 7 -7 16 7.1
 3 7 -7 10.9 17.3
 -3 -7 7 4.9 4.1
 -3 -7 7 9 4.2
 2 7 -7 696.33 76.19
 -2 -7 7 784.92 78.99
 -2 -7 7 765.02 74.49
 -2 -7 7 767.42 75.19
 1 7 -7 8.2 5.3
 1 7 -7 6.9 14.3
 -1 -7 7 2.5 3.4
 -1 -7 7 2.8 4.4
 -1 -7 7 -1.2 6.2
 -1 -7 7 1.8 3.1
 0 7 -7 1708.03 183.88
 0 -7 7 1803.62 163.98
 0 -7 7 1529.75 169.98
 0 -7 7 1764.02 163.88
 -1 7 -7 117.79 34.5
 1 -7 7 178.18 19.2
 1 -7 7 172.78 26.9
 1 -7 7 186.08 19
 -2 7 -7 304.37 58.49
 2 -7 7 460.85 42.2
 2 -7 7 440.46 51.99
 2 -7 7 410.36 41.3
 -3 7 -7 112.49 35.2
 -3 7 -7 131.19 19.3
 3 -7 7 141.29 16.5
 3 -7 7 164.88 28.5
 3 -7 7 143.09 15.6
 -4 7 -7 2.6 11.4
 -4 7 -7 -4.8 16.5
 4 -7 7 12.5 4.3
 4 -7 7 -4.1 3.9
 4 -7 7 -1.3 9.8
 -5 7 -7 2 15.4
 -5 7 -7 -4.4 20.7
 5 -7 7 2.6 4.8
 5 -7 7 -3.1 4.5
 5 -7 7 4.4 13
 5 -7 7 0 4.2
 -6 7 -7 4 35.8
 -6 7 -7 25.5 33.8
 6 -7 7 17.3 6.7
 6 -7 7 29 7
 6 -7 7 14.4 6.3
 6 -7 7 31.2 19.7
 7 6 -7 37.9 9.5
 -7 -6 7 25.2 5.8
 -7 -6 7 17.3 10
 -7 -6 7 20.8 27
 6 6 -7 101.49 14.2
 -6 -6 7 90.29 11.3
 -6 -6 7 70.09 28
 -6 -6 7 88.99 13.2
 5 6 -7 -2.6 5.1
 -5 -6 7 0.3 4.3
 -5 -6 7 -0.8 3
 -5 -6 7 -0.3 15.1
 4 6 -7 66.99 11
 -4 -6 7 63.99 9
 -4 -6 7 60.39 9.4
 -4 -6 7 68.69 13.1
 -4 -6 7 61.09 19.7
 3 6 -7 30.3 7.4
 -3 -6 7 30.8 6
 -3 -6 7 24 6.6
 -3 -6 7 36.1 8.2
 -3 -6 7 28.8 8.8
 -3 -6 7 34.6 6.4
 2 6 -7 216.98 26
 -2 -6 7 251.87 24.7
 -2 -6 7 251.07 28.8
 -2 -6 7 211.58 24.9
 1 6 -7 1186.58 125.89
 -1 -6 7 1333.77 130.29
 -1 -6 7 1331.97 124.69
 0 6 -7 78.19 24.5
 0 -6 7 95.09 17.2
 0 -6 7 77.99 10.8
 0 -6 7 95.69 11.3
 -1 6 -7 1628.34 198.38
 1 -6 7 2052.19 182.78
 1 -6 7 2082.79 191.78
 1 -6 7 1803.52 182.08
 -2 6 -7 127.19 39.9
 2 -6 7 178.08 17.7
 2 -6 7 163.58 18.4
 -3 6 -7 478.85 71.69
 -3 6 -7 484.95 59.19
 3 -6 7 608.64 65.69
 3 -6 7 525.25 52.89
 3 -6 7 613.24 54.19
 -4 6 -7 42.5 24
 -4 6 -7 21.7 14
 4 -6 7 34 7
 4 -6 7 44.4 7.5
 4 -6 7 34.1 6.5
 4 -6 7 50.59 18.3
 -5 6 -7 -1.7 13.7
 -5 6 -7 3.5 16.5
 5 -6 7 4.9 4.3
 5 -6 7 -1.2 9.6
 5 -6 7 3.4 3.7
 5 -6 7 -0.7 3.5
 -6 6 -7 62.79 10.6
 -6 6 -7 60.19 48.5
 -6 6 -7 64.39 31.4
 6 -6 7 62.79 11.1
 6 -6 7 66.39 10.8
 6 -6 7 121.89 29.2
 6 -6 7 97.79 12.3
 -7 6 -7 45.8 8.9
 -7 6 -7 31.1 30.7
 -7 6 -7 34.9 29.8
 7 -6 7 40.9 8.8
 7 -6 7 51.69 22
 7 -6 7 58.59 9.9
 7 5 -7 248.38 26.1
 -7 -5 7 233.38 26.2
 -7 -5 7 222.78 24.2
 -7 -5 7 184.48 53.29
 -7 -5 7 276.07 27.8
 -6 -5 7 38 22.4
 -6 -5 7 45.9 8.5
 -6 -5 7 50.69 10.1
 5 5 -7 1.9 3.8
 -5 -5 7 12.4 3
 -5 -5 7 0.1 3.3
 -5 -5 7 3.3 14.3
 4 5 -7 11 4.3
 -4 -5 7 18.9 4.1
 -4 -5 7 12.6 13.1
 -4 -5 7 17.8 4.5
 3 5 -7 495.65 45.5
 -3 -5 7 484.45 44.2
 -3 -5 7 364.86 51.39
 2 5 -7 46 8.1
 2 5 -7 79.99 22.2
 -2 -5 7 44.4 6.8
 -2 -5 7 67.49 10.9
 -2 -5 7 41.4 7.5
 -2 -5 7 52.89 7.3
 -2 -5 7 53.99 11.3
 1 5 -7 844.52 87.69
 -1 -5 7 900.11 86.79
 -1 -5 7 929.01 92.19
 0 5 -7 1467.95 159.28
 0 -5 7 1484.25 143.99
 0 -5 7 1484.15 143.89
 0 -5 7 1543.85 150.88
 -1 5 -7 460.35 64.69
 1 -5 7 511.95 50.59
 1 -5 7 537.05 59.29
 1 -5 7 547.35 51.29
 -2 5 -7 1905.41 231.58
 -2 5 -7 2296.77 221.18
 2 -5 7 2072.59 216.18
 2 -5 7 2596.74 228.18
 2 -5 7 2446.26 217.38
 -3 5 -7 6.6 8.3
 -3 5 -7 5.4 10.8
 3 -5 7 6.3 2.6
 3 -5 7 1.6 2.2
 3 -5 7 1 6.5
 -4 5 -7 521.25 69.39
 -4 5 -7 507.55 74.49
 4 -5 7 702.73 58.29
 4 -5 7 543.85 57.39
 4 -5 7 608.34 56.79
 -5 5 -7 8.9 3.9
 -5 5 -7 8.2 15.4
 -5 5 -7 2 14
 5 -5 7 1.8 3.8
 5 -5 7 11.4 11.9
 5 -5 7 3.6 3.3
 5 -5 7 10.7 4
 -6 5 -7 18.6 18.2
 -6 5 -7 22.8 22.1
 -6 5 -7 18.8 5.1
 6 -5 7 32.7 5.7
 6 -5 7 27.7 15.4
 6 -5 7 31.5 6.4
 6 -5 7 12.9 5.6
 -7 5 -7 95.49 12.5
 -7 5 -7 48.8 30.6
 -7 5 -7 34.9 29.6
 7 -5 7 155.98 33.7
 7 -5 7 105.89 13.3
 7 -5 7 78.99 12.7
 -8 5 -7 233.48 33.2
 -8 5 -7 205.78 66.09
 -8 5 -7 239.78 60.79
 8 -5 7 232.98 28.6
 8 -5 7 308.67 29.2
 8 4 -7 144.09 16.3
 8 4 -7 127.49 22.3
 -8 -4 7 124.89 16.5
 -8 -4 7 143.79 19.2
 -8 -4 7 67.09 40.9
 7 4 -7 411.76 48.5
 7 4 -7 489.05 45.1
 -7 -4 7 438.46 43.9
 -7 -4 7 375.36 72.69
 -7 -4 7 430.76 45.6
 -7 -4 7 500.85 47
 6 4 -7 100.29 12.5
 -6 -4 7 99.89 11.5
 -6 -4 7 117.69 13.9
 -6 -4 7 97.79 12.9
 5 4 -7 91.79 11.3
 -5 -4 7 90.09 11.4
 -5 -4 7 90.69 10.4
 4 4 -7 4.8 3
 -4 -4 7 6.5 3.2
 -4 -4 7 5 2.3
 3 4 -7 34.7 6.1
 -3 -4 7 32.6 7
 -3 -4 7 39.8 5.5
 -3 -4 7 34.8 5.7
 2 4 -7 792.82 80.99
 -2 -4 7 749.33 82.49
 -2 -4 7 877.91 80.29
 -2 -4 7 795.12 80.49
 -2 -4 7 936.51 84.79
 1 4 -7 113.19 13.6
 1 4 -7 160.78 26.7
 -1 -4 7 121.49 12.9
 -1 -4 7 114.79 14.3
 -1 -4 7 110.09 17.5
 0 4 -7 2891.71 297.67
 0 -4 7 3110.69 283.97
 0 -4 7 2901.81 290.67
 -1 4 -7 863.31 92.89
 -1 4 -7 887.71 104.49
 1 -4 7 1081.29 100.69
 1 -4 7 1013.2 91.39
 1 -4 7 900.01 90.49
 -2 4 -7 1300.87 145.39
 -2 4 -7 1401.86 136.79
 2 -4 7 1291.47 129.99
 2 -4 7 1442.96 131.09
 -3 4 -7 1714.53 199.88
 3 -4 7 2280.47 191.78
 -4 4 -7 248.18 42
 -4 4 -7 234.98 39.8
 -4 4 -7 264.87 26.2
 4 -4 7 262.97 26.2
 4 -4 7 344.87 40.9
 4 -4 7 311.87 27.7
 4 -4 7 205.58 26.5
 -5 4 -7 217.08 41.5
 -5 4 -7 257.17 25
 -5 4 -7 208.28 41.9
 5 -4 7 231.68 25.6
 5 -4 7 243.88 24.9
 5 -4 7 286.87 26.3
 -6 4 -7 1.2 3.5
 -6 4 -7 1.9 13.5
 -6 4 -7 5.9 17.6
 6 -4 7 1.5 3.7
 6 -4 7 3.6 3.3
 6 -4 7 7.4 11
 -7 4 -7 249.28 25.1
 -7 4 -7 203.68 54.09
 -7 4 -7 187.88 46.1
 7 -4 7 220.38 25.3
 7 -4 7 245.18 25.5
 -8 4 -7 20.4 31.8
 -8 4 -7 15.5 23.3
 -8 4 -7 39 8.6
 8 -4 7 19.3 17.6
 8 -4 7 28.2 7.6
 -9 4 -7 359.46 93.29
 -9 4 -7 362.36 79.59
 -9 4 -7 550.44 52.99
 9 -4 7 647.44 76.89
 9 -4 7 509.45 52.39
 8 3 -7 843.52 76.09
 8 3 -7 661.13 79.59
 -8 -3 7 795.22 78.19
 -8 -3 7 777.42 78.19
 7 3 -7 97.09 16.4
 7 3 -7 107.29 12.4
 -7 -3 7 103.39 14.6
 -7 -3 7 103.89 13.2
 6 3 -7 736.53 78.99
 6 3 -7 739.83 76.29
 -6 -3 7 897.81 78.19
 -6 -3 7 747.13 77.19
 -6 -3 7 815.72 75.89
 5 3 -7 30 5.5
 5 3 -7 34.1 8
 -5 -3 7 41.8 6.2
 -5 -3 7 32.1 4.8
 4 3 -7 123.19 13.6
 -4 -3 7 135.99 13.2
 -4 -3 7 106.39 13.6
 -4 -3 7 131.49 14.2
 3 3 -7 274.07 27.7
 -3 -3 7 275.97 27.6
 -3 -3 7 258.27 27
 -3 -3 7 281.87 30.3
 2 3 -7 115.09 12.4
 -2 -3 7 97.69 14.7
 -2 -3 7 101.39 11.6
 -2 -3 7 118.19 12.1
 -2 -3 7 125.09 16.5
 1 3 -7 3075.49 274.77
 -1 -3 7 2717.93 273.97
 -1 -3 7 3077.79 280.77
 -1 -3 7 2644.64 276.57
 0 3 -7 225.38 32.8
 0 -3 7 209.88 24.3
 0 -3 7 179.88 20.4
 0 -3 7 207.18 27.7
 -1 3 -7 5120.39 499.95
 -1 3 -7 4838.92 508.45
 1 -3 7 5747.42 506.25
 1 -3 7 5132.49 495.45
 -2 3 -7 100.39 17.9
 -2 3 -7 95.49 21.5
 2 -3 7 131.79 21.5
 2 -3 7 113.09 12
 2 -3 7 102.39 10.7
 -3 3 -7 1907.41 183.98
 -3 3 -7 1685.83 185.48
 -3 3 -7 1878.81 170.88
 3 -3 7 1685.93 171.58
 3 -3 7 1784.62 170.78
 -4 3 -7 134.69 13.1
 -4 3 -7 112.69 26.5
 -4 3 -7 110.69 25.6
 4 -3 7 121.09 13.7
 -5 3 -7 87.49 27.5
 -5 3 -7 96.19 10.8
 -5 3 -7 89.39 24.8
 5 -3 7 73.59 10.9
 5 -3 7 154.98 26.4
 -6 3 -7 33.9 6.3
 -6 3 -7 27.7 21.6
 -6 3 -7 16.9 12.7
 6 -3 7 34.1 15.2
 6 -3 7 22.7 5.6
 -7 3 -7 9.6 22.2
 -7 3 -7 15.9 5.9
 -7 3 -7 8.2 16.8
 7 -3 7 20.9 14.7
 7 -3 7 15.2 5.7
 -8 3 -7 399.86 35.9
 -8 3 -7 276.77 56.49
 -8 3 -7 291.47 68.79
 8 -3 7 306.87 35.2
 -9 3 -7 51.69 11.3
 -9 3 -7 43.4 43
 -9 3 -7 18.6 25.5
 9 -3 7 23.7 8.9
 9 -3 7 59.49 24.6
 9 2 -7 314.77 39
 -9 -2 7 346.97 35.6
 8 2 -7 98.19 17.1
 8 2 -7 123.79 12.6
 -8 -2 7 99.29 14.2
 -8 -2 7 111.19 15.6
 7 2 -7 1153.88 110.19
 7 2 -7 1161.08 113.69
 -7 -2 7 1121.99 111.49
 -7 -2 7 1150.78 112.19
 6 2 -7 16.1 5.7
 6 2 -7 11 3
 -6 -2 7 12.4 3.8
 -6 -2 7 12.4 4.7
 5 2 -7 333.67 40.8
 5 2 -7 418.86 39.1
 -5 -2 7 385.16 38.7
 -5 -2 7 418.06 40.1
 -5 -2 7 432.16 40.6
 4 2 -7 60.99 8.7
 4 2 -7 53.69 6.8
 -4 -2 7 48 9.7
 -4 -2 7 65.69 6.7
 -4 -2 7 58.49 7.8
 -4 -2 7 64.59 7.6
 3 2 -7 8.8 2.4
 3 2 -7 4.3 2.7
 -3 -2 7 11.9 2.9
 -3 -2 7 4.8 4.2
 -3 -2 7 2.4 1.4
 -3 -2 7 3.7 2.1
 2 2 -7 692.43 62.09
 -2 -2 7 566.04 66.09
 -2 -2 7 754.92 62.09
 -2 -2 7 593.74 61.49
 -2 -2 7 594.04 61.79
 -1 -2 7 2094.39 196.38
 -1 -2 7 2025.5 196.38
 -1 -2 7 2077.59 200.08
 -1 -2 7 2026 203.38
 0 2 -7 3113.99 298.97
 0 -2 7 3151.18 299.67
 0 -2 7 3239.08 304.07
 0 -2 7 2904.81 295.57
 -1 2 -7 2793.92 312.47
 -1 2 -7 3089.59 306.67
 1 -2 7 3620.64 312.97
 -2 2 -7 3915.11 360.36
 -2 2 -7 3453.45 363.66
 -3 2 -7 117.39 24.5
 -3 2 -7 149.59 26.1
 -3 2 -7 152.08 14.2
 3 -2 7 136.09 14.8
 -4 2 -7 517.85 64.89
 -4 2 -7 453.05 60.79
 4 -2 7 503.65 48.5
 -5 2 -7 35.8 15.7
 -5 2 -7 34.8 17.9
 -5 2 -7 50.39 6.4
 5 -2 7 28.9 5.7
 5 -2 7 73.69 20.1
 -6 2 -7 1.1 15.9
 -6 2 -7 -2.9 9
 -6 2 -7 2 3.7
 6 -2 7 2.8 9.7
 -7 2 -7 -1.2 18.5
 -7 2 -7 -0.3 11.9
 -7 2 -7 3.9 5.2
 7 -2 7 4 12
 7 -2 7 4.2 3.5
 -8 2 -7 102.19 14.3
 -8 2 -7 69.89 28.4
 -8 2 -7 60.69 35.5
 8 -2 7 134.39 29.1
 8 -2 7 64.99 12.5
 -9 2 -7 266.07 54.79
 9 -2 7 319.67 34
 9 1 -7 491.05 53.59
 -9 -1 7 505.05 50.89
 8 1 -7 285.77 34.4
 -8 -1 7 346.47 32.9
 -8 -1 7 312.27 33.6
 -8 -1 7 296.97 36.8
 7 1 -7 647.64 69.29
 -7 -1 7 721.73 68.59
 -7 -1 7 667.63 67.69
 -7 -1 7 704.03 71.49
 6 1 -7 1033.1 91.39
 6 1 -7 890.21 94.09
 -6 -1 7 923.31 93.29
 -6 -1 7 961.3 92.89
 -6 -1 7 933.81 95.39
 5 1 -7 82.69 8.8
 5 1 -7 82.09 11.1
 -5 -1 7 93.19 10.2
 -5 -1 7 77.99 10.5
 -5 -1 7 77.59 12.9
 4 1 -7 14.9 2.4
 4 1 -7 8.9 3.6
 -4 -1 7 4.5 1.3
 -4 -1 7 5.9 2.9
 -4 -1 7 4.6 2.4
 3 1 -7 6 2.6
 -3 -1 7 0.6 0.9
 -3 -1 7 13.1 2.8
 -3 -1 7 1 1.6
 2 1 -7 1604.94 148.89
 -2 -1 7 1470.05 148.59
 -2 -1 7 1487.75 148.39
 -2 -1 7 1641.84 148.09
 -1 -1 7 130.79 19.4
 -1 -1 7 148.59 14.5
 -1 -1 7 134.59 14.6
 -1 -1 7 156.38 14.6
 -1 -1 7 146.89 18.6
 0 1 -7 2237.98 208.08
 0 -1 7 2066.79 207.78
 0 -1 7 2092.79 202.98
 -1 1 -7 4181.58 409.96
 1 -1 7 3958.9 405.56
 1 -1 7 4442.26 409.06
 2 -1 7 2442.56 219.28
 2 -1 7 1827.22 211.98
 -3 1 -7 1437.86 153.28
 -3 1 -7 1595.84 140.29
 -3 1 -7 1289.97 151.18
 3 -1 7 1504.15 140.69
 -4 1 -7 47.4 6.1
 -4 1 -7 38.3 14.5
 -4 1 -7 53.69 19.2
 -4 1 -7 50.89 6.5
 4 -1 7 40.3 6.2
 4 -1 7 91.99 19.8
 -5 1 -7 480.75 63.99
 -5 1 -7 627.34 52.09
 -5 1 -7 434.46 68.19
 5 -1 7 518.75 51.99
 -6 1 -7 7.2 3.4
 -6 1 -7 2.6 13.9
 -6 1 -7 4.8 3.6
 -6 1 -7 2.3 8.8
 6 -1 7 7.1 11.1
 6 -1 7 2.5 2.6
 -7 1 -7 21.5 14.1
 -7 1 -7 33.3 26.4
 -7 1 -7 37.2 7.6
 -7 1 -7 41.3 8.2
 7 -1 7 29.6 7.5
 7 -1 7 82.79 22.1
 -8 1 -7 21.1 7.1
 -8 1 -7 17.9 5.9
 -8 1 -7 21.2 28.4
 -8 1 -7 31.5 18.2
 8 -1 7 18.6 6.3
 8 -1 7 46 18.9
 -9 1 -7 362.86 41.7
 -9 1 -7 345.07 95.79
 -9 1 -7 261.37 54.29
 9 -1 7 353.76 41.2
 9 -1 7 430.16 37.4
 9 0 -7 14.9 11.7
 -9 0 7 10.2 5.8
 -9 0 7 5.5 12.8
 -9 0 7 8.4 7.4
 8 0 -7 1334.57 145.59
 -8 0 7 1641.14 144.69
 -8 0 7 1475.65 151.68
 -8 0 7 1498.25 145.29
 7 0 -7 27 6.6
 -7 0 7 24.8 10.7
 -7 0 7 28.3 7.1
 -7 0 7 29.1 6
 6 0 -7 1092.39 116.69
 -6 0 7 1340.37 116.09
 -6 0 7 1155.78 120.19
 -6 0 7 1199.98 116.59
 5 0 -7 167.28 18
 -5 0 7 176.98 17.9
 -5 0 7 156.08 20.3
 -5 0 7 146.09 16.9
 4 0 -7 8.1 2.9
 -4 0 7 6.8 4.4
 -4 0 7 5.8 2.6
 -4 0 7 7.2 2.4
 3 0 -7 27.9 4.3
 3 0 -7 14 3.8
 -3 0 7 38.6 4.8
 -3 0 7 23.7 3.6
 2 0 -7 48.1 5.5
 2 0 -7 39.4 6
 -2 0 7 48.5 5.8
 -2 0 7 47.1 5.2
 -2 0 7 41.1 4.6
 1 0 -7 1520.15 143.89
 -1 0 7 1515.85 143.19
 -1 0 7 1507.65 143.69
 -1 0 7 1461.05 150.68
 0 0 -7 2.4 2.9
 0 0 -7 5.2 1.4
 0 0 7 9.3 1.5
 0 0 7 2.5 3.1
 -1 0 -7 2564.04 233.28
 -1 0 -7 2231.28 221.38
 1 0 7 1964.8 221.38
 1 0 7 2293.47 228.58
 1 0 7 2679.43 231.58
 -2 0 -7 881.71 94.89
 -2 0 -7 901.41 94.49
 -2 0 -7 922.81 84.99
 2 0 7 842.92 84.99
 -3 0 -7 2253.17 191.88
 -3 0 -7 1872.51 201.58
 -3 0 -7 1958.9 204.68
 3 0 7 1915.81 191.78
 -4 0 -7 1273.57 145.89
 -4 0 -7 1529.15 154.08
 4 0 7 1456.05 136.29
 -5 0 -7 465.35 68.09
 -5 0 -7 598.44 59.19
 -5 0 -7 712.83 59.79
 5 0 7 629.64 59.89
 -6 0 -7 59.29 18.4
 -6 0 -7 86.79 9.6
 -6 0 -7 79.79 9.4
 -6 0 -7 58.49 26.6
 6 0 7 44.6 9
 -7 0 -7 121.79 13.6
 -7 0 -7 103.09 36.9
 -7 0 -7 118.29 13.3
 -7 0 -7 67.99 22.4
 7 0 7 96.99 13.7
 7 0 7 104.69 12.2
 -8 0 -7 239.08 24.3
 -8 0 -7 145.99 49.99
 -8 0 -7 153.28 35.8
 -8 0 -7 252.17 24.7
 8 0 7 226.78 22.9
 8 0 7 211.48 24.8
 -9 0 -7 1.6 29.2
 -9 0 -7 -4.6 15.3
 -9 0 -7 14 6.5
 -9 0 -7 9.3 7.5
 9 0 7 10 6.8
 9 0 7 7.8 12.7
 9 0 7 6.2 4.6
 -10 0 -7 588.34 67.29
 10 0 7 609.24 65.39
 10 0 7 789.42 80.39
 -9 1 7 737.23 76.79
 -9 1 7 770.02 88.29
 -9 1 7 806.02 77.99
 8 -1 -7 228.18 28.1
 -8 1 7 263.97 28.2
 -8 1 7 240.28 35.9
 -8 1 7 260.87 26.9
 7 -1 -7 1397.46 159.38
 -7 1 7 1571.54 166.08
 -7 1 7 1860.01 159.08
 -7 1 7 1758.62 159.88
 6 -1 -7 7 3.9
 -6 1 7 3.5 3.2
 -6 1 7 7.9 6.7
 -6 1 7 10.8 3.8
 5 -1 -7 757.82 77.29
 5 -1 -7 703.53 76.19
 -5 1 7 792.22 75.89
 -5 1 7 775.92 81.09
 -5 1 7 876.41 76.89
 4 -1 -7 316.67 28.8
 4 -1 -7 245.68 29.2
 -4 1 7 281.67 29
 -4 1 7 313.87 28.3
 -4 1 7 246.28 32
 3 -1 -7 151.08 14.6
 3 -1 -7 129.39 15.2
 -3 1 7 133.29 14.1
 -3 1 7 132.59 14.9
 2 -1 -7 316.47 31
 2 -1 -7 323.47 31.8
 -2 1 7 323.67 31.6
 -2 1 7 305.57 30.7
 1 -1 -7 660.33 60.79
 1 -1 -7 619.64 61.59
 -1 1 7 627.84 66.49
 -1 1 7 653.93 60.69
 -1 1 7 606.74 60.69
 0 -1 -7 1514.05 152.08
 0 -1 -7 1562.24 146.39
 0 1 7 1589.74 146.19
 0 1 7 1443.46 153.98
 -1 -1 -7 7.6 1.8
 -1 -1 -7 9.8 1.3
 -1 -1 -7 7.2 5.4
 1 1 7 8.4 1.4
 1 1 7 12 6.1
 -2 -1 -7 4775.22 432.76
 -2 -1 -7 4809.52 443.76
 2 1 7 4076.39 432.76
 -3 -1 -7 35 14
 -3 -1 -7 31 4.6
 3 1 7 50.99 20.9
 3 1 7 33.6 4.9
 3 1 7 57.69 15.6
 -4 -1 -7 3008.3 246.08
 -4 -1 -7 2190.18 260.17
 -4 -1 -7 2201.88 253.57
 4 1 7 2831.32 246.48
 -5 -1 -7 310.47 46.9
 -5 -1 -7 454.85 40.1
 -5 -1 -7 316.87 54.89
 5 1 7 469.35 39.9
 5 1 7 409.96 40.5
 -6 -1 -7 309.17 58.09
 -6 -1 -7 463.05 41.2
 6 1 7 409.36 40.4
 6 1 7 399.76 41.5
 -7 -1 -7 65.69 10.3
 -7 -1 -7 37.1 16.5
 -7 -1 -7 83.89 10.6
 -7 -1 -7 36.4 23.1
 7 1 7 73.69 11
 7 1 7 109.09 22.4
 7 1 7 81.29 9.5
 -8 -1 -7 9.2 20.5
 -8 -1 -7 3.5 4
 -8 -1 -7 4.6 11.8
 -8 -1 -7 2.7 4.9
 8 1 7 12.3 6.7
 8 1 7 7.8 11.5
 8 1 7 8.7 4
 -9 -1 -7 436.36 43.3
 -9 -1 -7 408.16 43.1
 9 1 7 424.46 41.7
 9 1 7 355.26 43.9
 10 1 7 16.5 6.5
 10 1 7 18.4 16
 9 -2 -7 394.96 48
 -9 2 7 418.96 59.39
 -9 2 7 463.95 45
 -9 2 7 437.06 46.2
 8 -2 -7 665.73 68.69
 -8 2 7 569.64 77.09
 -8 2 7 784.32 67.99
 -8 2 7 698.43 68.79
 7 -2 -7 539.05 59.99
 -7 2 7 627.14 60.69
 -7 2 7 590.44 68.89
 -7 2 7 635.94 59.59
 6 -2 -7 1121.99 115.09
 6 -2 -7 1111.19 114.19
 -6 2 7 1218.08 114.79
 -6 2 7 1212.28 113.79
 -6 2 7 1198.28 122.09
 5 -2 -7 38.1 6.1
 5 -2 -7 39.7 7.8
 -5 2 7 35.2 6.7
 -5 2 7 36.5 5.6
 -5 2 7 31.3 10.6
 4 -2 -7 542.35 59.79
 4 -2 -7 539.75 58.79
 -4 2 7 674.93 59.89
 -4 2 7 680.83 58.89
 -4 2 7 580.74 64.59
 3 -2 -7 25.6 4.9
 3 -2 -7 25.6 3.9
 -3 2 7 22 3.7
 -3 2 7 35.3 8.6
 2 -2 -7 305.87 30
 2 -2 -7 292.37 28.4
 2 -2 -7 269.27 28.8
 -2 2 7 317.67 28.6
 1 -2 -7 752.52 69.99
 1 -2 -7 687.53 68.89
 1 -2 -7 772.92 68.99
 -1 2 7 729.53 69.09
 -1 2 7 661.23 74.89
 -1 2 7 715.13 69.69
 0 -2 -7 1526.35 140.89
 0 -2 -7 1538.25 141.49
 0 -2 -7 1395.76 147.19
 0 2 7 1334.77 141.19
 0 2 7 1611.54 141.39
 0 2 7 1442.26 147.19
 -1 -2 -7 1708.63 166.38
 -1 -2 -7 1787.72 165.78
 -1 -2 -7 1742.83 173.98
 1 2 7 1840.12 174.08
 1 2 7 1621.14 166.08
 -2 -2 -7 1144.79 109.39
 -2 -2 -7 1247.08 120.79
 2 2 7 1055.69 109.19
 -3 -2 -7 3798.02 357.06
 -3 -2 -7 4068.69 371.66
 3 2 7 3546.65 357.06
 3 2 7 3597.44 357.06
 -4 -2 -7 5.6 8.8
 -4 -2 -7 6.9 2.4
 4 2 7 17 11.4
 4 2 7 6.3 2.9
 4 2 7 6.8 2.2
 4 2 7 18.5 17.2
 -5 -2 -7 562.04 85.79
 -5 -2 -7 859.91 71.39
 5 2 7 694.43 71.49
 5 2 7 744.03 70.69
 -6 -2 -7 3.6 2.7
 -6 -2 -7 1.2 13.2
 6 2 7 6.3 3.9
 6 2 7 6.9 10.1
 6 2 7 1.2 2.2
 -7 -2 -7 30.5 7
 -7 -2 -7 20.7 19.1
 7 2 7 39.7 6.6
 7 2 7 22 7
 7 2 7 68.09 17.8
 -8 -2 -7 80.29 12.7
 -8 -2 -7 40.1 30.1
 -8 -2 -7 88.59 12.6
 8 2 7 88.39 14.7
 8 2 7 135.69 22
 8 2 7 81.99 11.7
 -9 -2 -7 67.49 12.8
 9 2 7 30.1 11.7
 9 2 7 65.49 18.1
 9 2 7 66.09 10.3
 9 -3 -7 10.7 8.7
 -9 3 7 -1.4 17.7
 -9 3 7 0.7 8.5
 8 -3 -7 751.92 77.89
 -8 3 7 780.22 91.09
 -8 3 7 791.82 78.09
 7 -3 -7 265.57 31.7
 7 -3 -7 239.78 30.2
 -7 3 7 338.37 42.8
 -7 3 7 308.37 31.4
 6 -3 -7 636.94 60.49
 6 -3 -7 587.94 61.59
 -6 3 7 555.64 68.99
 -6 3 7 643.04 61.19
 5 -3 -7 784.52 87.89
 5 -3 -7 891.01 89.39
 -5 3 7 1028.8 89.39
 -5 3 7 945.81 97.19
 4 -3 -7 349.27 32.3
 4 -3 -7 318.37 33.5
 4 -3 -7 320.17 34.7
 -4 3 7 371.86 34.8
 -4 3 7 313.57 40.5
 3 -3 -7 52.79 5.3
 3 -3 -7 40.4 5.9
 -3 3 7 49.6 5.5
 -3 3 7 49.8 11.6
 -3 3 7 51.59 7.3
 2 -3 -7 12.5 2.2
 2 -3 -7 13.5 3.6
 2 -3 -7 13.2 2.6
 -2 3 7 15.2 7.7
 -2 3 7 13.3 3.3
 -2 3 7 10.1 2.2
 1 -3 -7 727.53 69.29
 1 -3 -7 717.33 68.29
 -1 3 7 661.13 74.79
 -1 3 7 729.13 68.39
 -1 3 7 711.83 69.09
 0 -3 -7 272.67 26.8
 0 -3 -7 274.17 27.5
 0 3 7 262.37 33.3
 0 3 7 269.27 27.4
 0 3 7 278.57 26.9
 -1 -3 -7 6528.75 636.34
 -1 -3 -7 6908.11 644.44
 -1 -3 -7 6581.54 635.74
 1 3 7 7078.29 644.64
 1 3 7 6327.87 635.84
 -2 -3 -7 2306.07 227.98
 -2 -3 -7 2458.85 227.48
 -2 -3 -7 2581.94 239.28
 -2 -3 -7 2427.66 227.38
 2 3 7 2309.47 227.28
 2 3 7 2219.98 227.48
 -3 -3 -7 1550.34 139.99
 -3 -3 -7 1443.36 153.08
 3 3 7 1409.16 139.79
 3 3 7 1416.76 139.89
 -4 -3 -7 742.93 99.89
 -4 -3 -7 1024 87.69
 4 3 7 957.3 87.29
 4 3 7 846.22 87.49
 -5 -3 -7 62.69 23.8
 -5 -3 -7 86.09 9.7
 5 3 7 65.79 9
 5 3 7 67.69 9.9
 -6 -3 -7 142.49 14.4
 -6 -3 -7 72.19 28.8
 6 3 7 100.99 14.4
 6 3 7 129.19 13.7
 -7 -3 -7 0.1 3.1
 -7 -3 -7 -7.7 15.4
 7 3 7 4.8 8.9
 7 3 7 4.4 3.4
 7 3 7 1 5.1
 -8 -3 -7 6.4 21.2
 -8 -3 -7 7 5.1
 8 3 7 13.2 4.8
 8 3 7 6.1 6.9
 8 3 7 10.7 9
 -9 -3 -7 135.29 16.5
 -9 -3 -7 118.49 16.6
 -9 -3 -7 53.59 38.2
 9 3 7 95.99 19.2
 9 3 7 133.79 15.7
 8 -4 -7 26.5 8.3
 8 -4 -7 17.6 9.6
 -8 4 7 15.6 17.2
 -8 4 7 10.8 9.6
 7 -4 -7 1091.39 110.69
 7 -4 -7 1115.49 112.29
 -7 4 7 1253.97 111.89
 -7 4 7 1065.39 123.99
 6 -4 -7 107.49 10.5
 6 -4 -7 87.89 14.5
 6 -4 -7 99.79 13
 -6 4 7 86.69 22.3
 -6 4 7 121.19 14.8
 5 -4 -7 606.34 65.89
 5 -4 -7 659.73 64.89
 5 -4 -7 683.03 63.49
 -5 4 7 591.24 74.09
 -5 4 7 750.62 66.59
 4 -4 -7 439.36 44.2
 4 -4 -7 437.06 43.1
 4 -4 -7 462.95 45.5
 -4 4 7 481.85 45.4
 -4 4 7 417.36 52.79
 3 -4 -7 83.29 7.7
 3 -4 -7 55.39 9.2
 3 -4 -7 63.19 8.2
 -3 4 7 77.39 15.7
 -3 4 7 56.79 7.6
 -3 4 7 77.99 9.3
 2 -4 -7 21.2 4.8
 2 -4 -7 27.5 3.9
 -2 4 7 21.2 8.1
 -2 4 7 31 5
 -2 4 7 29.7 4.1
 -2 4 7 26.3 10.4
 1 -4 -7 28.1 5.3
 1 -4 -7 33.5 4.3
 -1 4 7 32 5.4
 -1 4 7 25.7 10
 -1 4 7 31.5 4.6
 0 -4 -7 2276.57 215.78
 0 -4 -7 2171.08 207.98
 0 -4 -7 2116.49 208.68
 0 4 7 2188.78 215.88
 0 4 7 2132.39 208.18
 -1 -4 -7 6.6 2.8
 -1 -4 -7 9.5 2.4
 -1 -4 -7 12.2 2.9
 -1 -4 -7 5.3 5.4
 1 4 7 16.8 3.5
 1 4 7 11.2 8.2
 -2 -4 -7 4659.33 459.35
 -2 -4 -7 5069.79 470.15
 -2 -4 -7 5038.8 458.55
 -2 -4 -7 4787.72 458.35
 2 4 7 4501.35 458.55
 -3 -4 -7 559.14 52.59
 -3 -4 -7 536.85 65.39
 -3 -4 -7 589.04 52.39
 3 4 7 449.26 52.19
 -4 -4 -7 1892.51 160.58
 -4 -4 -7 1876.11 161.08
 -4 -4 -7 1392.56 173.58
 4 4 7 1653.73 160.68
 4 4 7 1505.55 160.78
 -5 -4 -7 27.3 16
 -5 -4 -7 58.49 8.3
 5 4 7 56.89 7.8
 5 4 7 94.69 20.4
 5 4 7 36.6 7.9
 -6 -4 -7 71.89 27.9
 -6 -4 -7 110.49 13
 6 4 7 112.49 14
 6 4 7 90.39 12
 -7 -4 -7 27.9 21.5
 -7 -4 -7 35.8 7.5
 7 4 7 28.4 6.8
 7 4 7 15.1 6.6
 7 4 7 61.39 14.6
 -8 -4 -7 11.1 5.9
 -8 -4 -7 8.3 22.8
 8 4 7 6.8 4.7
 8 4 7 7.2 7.6
 -9 -4 -7 57.79 38.5
 -9 -4 -7 131.19 16.4
 9 4 7 110.19 20.2
 9 4 7 104.49 15.5
 8 -5 -7 484.35 51.89
 8 -5 -7 457.65 50.49
 -8 5 7 439.46 68.49
 -8 5 7 507.45 51.19
 7 -5 -7 190.58 23.3
 7 -5 -7 212.98 25.7
 7 -5 -7 208.28 19.9
 -7 5 7 230.38 25.3
 -7 5 7 139.59 36.2
 6 -5 -7 1466.05 149.49
 6 -5 -7 1614.44 146.29
 6 -5 -7 1411.16 148.19
 -6 5 7 1670.33 149.79
 -6 5 7 1474.25 162.68
 5 -5 -7 39.4 8.5
 5 -5 -7 46.1 7.5
 5 -5 -7 39.9 5.8
 -5 5 7 63.19 9.9
 -5 5 7 53.19 17.4
 4 -5 -7 918.41 91.09
 4 -5 -7 975.3 90.09
 4 -5 -7 952.8 93.79
 -4 5 7 818.32 104.39
 -4 5 7 998.2 92.49
 3 -5 -7 27.2 4.4
 3 -5 -7 21.9 4.8
 3 -5 -7 32.4 6.3
 -3 5 7 33 6.3
 -3 5 7 32.3 13.4
 -3 5 7 30.8 5
 -3 5 7 35.2 14
 2 -5 -7 68.29 8.4
 2 -5 -7 68.69 9.7
 -2 5 7 74.29 16.3
 -2 5 7 69.19 8.7
 -2 5 7 82.19 9.9
 -2 5 7 77.09 16
 1 -5 -7 56.99 6.4
 1 -5 -7 43.4 7.1
 -1 5 7 41.9 6.6
 -1 5 7 44.3 7.4
 -1 5 7 44 12.2
 -1 5 7 51.09 13.6
 0 -5 -7 976.1 90.89
 0 -5 -7 916.81 97.99
 0 -5 -7 917.41 91.69
 0 5 7 957.2 98.09
 0 5 7 923.21 91.19
 0 5 7 950.2 99.49
 -1 -5 -7 1934.31 193.78
 -1 -5 -7 1931.01 200.88
 -1 -5 -7 2022.9 192.88
 -1 -5 -7 2031.3 192.98
 1 5 7 2279.87 204.28
 1 5 7 1896.01 193.08
 -2 -5 -7 347.87 33.5
 -2 -5 -7 294.47 34.2
 -2 -5 -7 351.36 43.7
 -2 -5 -7 368.86 33.4
 2 5 7 291.17 33.3
 -3 -5 -7 2501.65 261.47
 -3 -5 -7 2722.93 248.68
 -3 -5 -7 2860.71 249.08
 3 5 7 2295.97 248.68
 -4 -5 -7 59.49 20.7
 -4 -5 -7 69.09 9.2
 -4 -5 -7 58.79 8.5
 4 5 7 59.29 8.8
 4 5 7 124.09 37.6
 -5 -5 -7 1014.2 125.29
 5 5 7 1239.68 110.49
 -6 -5 -7 14.1 17.1
 -6 -5 -7 37.3 8.1
 6 5 7 26.9 6.3
 6 5 7 29.3 7.5
 6 5 7 76.69 19.2
 -7 -5 -7 44.5 25.5
 -7 -5 -7 87.39 12
 7 5 7 61.19 13.2
 7 5 7 68.19 10.7
 -8 -5 -7 3.9 22.8
 8 5 7 10.3 11.8
 8 5 7 13.1 6.2
 7 -6 -7 450.75 41.7
 7 -6 -7 433.16 39.4
 7 -6 -7 283.27 35.4
 -7 6 7 353.36 71.09
 -7 6 7 475.35 43.6
 6 -6 -7 628.04 63.89
 6 -6 -7 647.44 61.79
 6 -6 -7 624.94 65.29
 -6 6 7 566.44 79.69
 -6 6 7 705.63 65.49
 5 -6 -7 812.92 71.39
 5 -6 -7 653.93 72.49
 5 -6 -7 718.73 73.99
 -5 6 7 798.42 74.29
 -5 6 7 673.83 86.79
 4 -6 -7 70.99 8
 4 -6 -7 50.89 10.2
 4 -6 -7 53.19 8.7
 -4 6 7 63.99 19.5
 -4 6 7 59.49 19.7
 -4 6 7 62.69 10.7
 3 -6 -7 209.58 20.1
 3 -6 -7 200.88 21.9
 3 -6 -7 188.18 20.6
 -3 6 7 167.08 20.3
 -3 6 7 202.68 22.1
 -3 6 7 166.98 30.5
 -3 6 7 215.98 31.4
 2 -6 -7 6.2 3.7
 2 -6 -7 0.6 2.4
 -2 6 7 7.1 4.5
 -2 6 7 1.5 7
 -2 6 7 7.3 3.1
 -2 6 7 3.9 7.2
 1 -6 -7 706.43 66.19
 1 -6 -7 626.74 67.09
 -1 6 7 701.23 75.59
 -1 6 7 755.12 67.79
 -1 6 7 614.84 66.49
 -1 6 7 674.33 75.59
 0 -6 -7 20.4 5.5
 0 -6 -7 18.5 4.2
 0 6 7 20.9 10.8
 0 6 7 21.1 4.9
 0 6 7 17.4 9.5
 -1 -6 -7 1060.99 93.49
 -1 -6 -7 839.92 99.79
 -1 -6 -7 940.31 94.19
 -1 -6 -7 1031 93.19
 1 6 7 943.01 93.59
 1 6 7 942.71 100.09
 -2 -6 -7 266.67 26.6
 -2 -6 -7 300.67 27.2
 -2 -6 -7 240.98 28
 -2 -6 -7 243.28 35.3
 2 6 7 213.98 26.7
 2 6 7 270.67 32.6
 -3 -6 -7 756.12 87.19
 -3 -6 -7 721.63 75.29
 -3 -6 -7 708.33 76.79
 -3 -6 -7 806.42 75.69
 3 6 7 818.02 80.69
 3 6 7 789.72 75.89
 -4 -6 -7 1986.2 223.58
 -4 -6 -7 2366.66 210.08
 4 6 7 2393.96 214.48
 4 6 7 1960.4 210.18
 -5 -6 -7 20.3 5.3
 -5 -6 -7 27.3 6.8
 -5 -6 -7 18.1 15.7
 5 6 7 8.2 5
 5 6 7 26.7 14.2
 5 6 7 19.8 7.7
 -6 -6 -7 702.83 68.99
 -6 -6 -7 783.02 70.39
 6 6 7 616.14 69.49
 -7 -6 -7 4.4 18.2
 -7 -6 -7 13.2 6.7
 7 6 7 6.4 5.7
 -8 -6 -7 9.6 7.3
 -8 -6 -7 3.2 24.1
 8 6 7 23.4 12.5
 8 6 7 3.2 9.8
 7 -7 -7 624.24 69.19
 7 -7 -7 666.83 67.59
 -7 7 7 570.64 89.49
 -7 7 7 790.42 70.29
 6 -7 -7 109.49 18
 6 -7 -7 99.09 14.5
 6 -7 -7 102.69 11.9
 -6 7 7 92.19 31.1
 -6 7 7 93.89 17.1
 -6 7 7 79.39 33.1
 5 -7 -7 711.33 73.39
 5 -7 -7 781.52 70.79
 5 -7 -7 652.93 71.79
 -5 7 7 751.12 87.49
 -5 7 7 643.04 88.89
 -5 7 7 792.12 73.79
 4 -7 -7 215.78 27
 4 -7 -7 228.58 25.5
 4 -7 -7 241.68 24.7
 -4 7 7 217.08 39.4
 -4 7 7 271.47 27.8
 -4 7 7 258.97 45.3
 3 -7 -7 9.1 4.9
 3 -7 -7 9.4 3.7
 -3 7 7 4.2 10
 -3 7 7 5.7 5.2
 -3 7 7 12 12.1
 -3 7 7 14 4.8
 2 -7 -7 151.28 16
 2 -7 -7 129.69 17.4
 -2 7 7 140.89 26.9
 -2 7 7 149.59 16.8
 -2 7 7 140.89 17.8
 -2 7 7 149.09 26.8
 1 -7 -7 46.8 6.6
 1 -7 -7 41.3 8
 -1 7 7 25.4 11.9
 -1 7 7 34.8 14.8
 -1 7 7 27.7 6.2
 0 -7 -7 345.07 36.6
 0 -7 -7 374.56 37.4
 0 7 7 380.26 46.8
 0 7 7 320.47 36.6
 0 7 7 351.46 45.2
 -1 -7 -7 20 9.8
 -1 -7 -7 32.4 6.4
 -1 -7 -7 18.3 5
 -1 -7 -7 33 7.7
 1 7 7 31.2 14.3
 1 7 7 25.9 10.9
 1 7 7 18.7 5.4
 -2 -7 -7 1144.49 101.99
 -2 -7 -7 1193.08 102.49
 -2 -7 -7 1033.4 103.59
 -2 -7 -7 953.6 109.39
 2 7 7 948.91 102.29
 2 7 7 1012.9 108.69
 -3 -7 -7 365.76 32.6
 -3 -7 -7 276.97 33.6
 -3 -7 -7 270.77 41.2
 -3 -7 -7 354.46 32
 3 7 7 310.97 37.6
 3 7 7 251.17 32
 -4 -7 -7 1202.98 100.69
 -4 -7 -7 837.52 100.99
 -4 -7 -7 1073.29 99.79
 -4 -7 -7 974.4 112.59
 4 7 7 1044.4 104.49
 4 7 7 973.3 100.39
 -5 -7 -7 633.54 92.09
 -5 -7 -7 896.71 79.59
 -5 -7 -7 865.71 80.19
 5 7 7 858.01 82.89
 5 7 7 742.73 79.89
 -6 -7 -7 138.19 15.9
 -6 -7 -7 125.29 16.6
 -6 -7 -7 82.99 32.4
 6 7 7 133.39 17.1
 -7 -7 -7 164.58 18.5
 -7 -7 -7 72.99 30
 7 7 7 120.59 17.5
 6 -8 -7 598.94 67.39
 6 -8 -7 629.84 69.29
 6 -8 -7 708.63 65.79
 -6 8 7 763.82 70.59
 -6 8 7 644.14 86.59
 5 -8 -7 20.7 5.5
 5 -8 -7 20.7 9.3
 5 -8 -7 21.2 6.7
 -5 8 7 23 19.5
 -5 8 7 10.9 19.7
 -5 8 7 7.8 8.9
 4 -8 -7 484.05 53.79
 4 -8 -7 466.65 51.99
 4 -8 -7 542.15 51.39
 -4 8 7 534.15 67.29
 -4 8 7 514.75 71.79
 -4 8 7 555.34 54.39
 3 -8 -7 176.68 17.9
 3 -8 -7 152.48 20
 -3 8 7 126.99 18.4
 -3 8 7 152.38 31.1
 -3 8 7 173.58 20.8
 -3 8 7 156.08 33.3
 2 -8 -7 37 7
 2 -8 -7 39.6 9
 -2 8 7 33 7.7
 -2 8 7 31.1 16
 -2 8 7 32.4 17.2
 1 -8 -7 -0.4 5.1
 1 -8 -7 5.5 4
 -1 8 7 14.5 5.1
 -1 8 7 6 11.6
 -1 8 7 8.7 11.4
 0 -8 -7 81.99 11.1
 0 -8 -7 73.89 12.8
 0 8 7 83.19 20.9
 0 8 7 99.19 24.9
 0 8 7 77.69 12.2
 -1 -8 -7 639.14 63.19
 -1 -8 -7 623.64 60.89
 -1 -8 -7 677.53 61.59
 1 8 7 589.54 61.99
 1 8 7 542.75 70.19
 -2 -8 -7 19 5.1
 -2 -8 -7 14 9.8
 -2 -8 -7 28.9 8.3
 -2 -8 -7 14.4 4.9
 2 8 7 25.4 23.5
 2 8 7 12 6
 2 8 7 10.8 9.5
 -3 -8 -7 1188.08 140.89
 -3 -8 -7 1452.15 136.29
 -3 -8 -7 1503.75 134.39
 3 8 7 1371.56 134.89
 3 8 7 1404.96 141.19
 -4 -8 -7 29.6 7.8
 -4 -8 -7 30.1 16.2
 -4 -8 -7 30.8 7
 -4 -8 -7 39 10.9
 4 8 7 48.8 9.7
 4 8 7 43.3 13.5
 -5 -8 -7 632.54 59.19
 -5 -8 -7 544.45 59.09
 -5 -8 -7 422.76 68.89
 5 8 7 689.33 64.19
 -6 -8 -7 100.19 13.4
 -6 -8 -7 43.8 24.4
 -6 -8 -7 99.59 14.7
 6 8 7 90.99 15.7
 4 -9 -7 10.7 9.3
 4 -9 -7 3.6 6.3
 4 -9 -7 1 5
 -4 9 7 -1.8 18.9
 -4 9 7 -2.3 9.8
 -4 9 7 5.5 19.2
 3 -9 -7 285.57 34
 3 -9 -7 326.27 31.8
 -3 9 7 254.37 32.9
 -3 9 7 283.47 55.19
 -3 9 7 329.97 48.1
 2 -9 -7 30.7 6.5
 2 -9 -7 30 9.5
 -2 9 7 32.8 18.6
 -2 9 7 7.8 16.6
 -2 9 7 22.7 8.4
 1 -9 -7 5.8 4.4
 1 -9 -7 18.5 8.1
 -1 9 7 4.5 14.9
 -1 9 7 14.1 14.1
 -1 9 7 6.5 5.9
 0 -9 -7 61.39 13.2
 0 -9 -7 94.99 12.4
 0 9 7 84.89 14.4
 0 9 7 84.59 25.2
 0 9 7 130.59 31.8
 -1 -9 -7 344.57 34.5
 -1 -9 -7 337.67 37.3
 -1 -9 -7 351.86 35.2
 1 9 7 323.77 46.5
 1 9 7 278.07 35.7
 -2 -9 -7 652.83 67.49
 -2 -9 -7 620.54 69.99
 -2 -9 -7 796.82 68.89
 2 9 7 625.04 69.09
 2 9 7 688.33 78.69
 -3 -9 -7 236.68 26.5
 -3 -9 -7 193.38 32
 -3 -9 -7 292.47 26.5
 -3 -9 -7 199.78 29.8
 3 9 7 253.07 40.2
 3 9 7 239.38 28
 -4 -9 -7 665.73 60.89
 -4 -9 -7 517.95 63.49
 -4 -9 -7 651.33 62.19
 -4 -9 -7 484.65 67.59
 4 9 7 698.43 70.59
 4 9 7 599.64 62.39
 -5 -9 -7 84.29 13.8
 -5 -9 -7 45 20.7
 5 9 7 45.4 18.4
 2 -10 -7 76.99 13.5
 2 -10 -7 71.99 16.1
 -2 10 7 90.79 33.4
 -2 10 7 101.79 17
 1 -10 -7 5.8 5.8
 1 -10 -7 10.4 9.8
 -1 10 7 -7.5 19.2
 -1 10 7 10.5 9
 -1 10 7 2.3 22
 0 -10 -7 78.39 14.8
 0 -10 -7 70.09 12.6
 0 -10 -7 90.49 17.9
 0 10 7 83.09 28.9
 0 10 7 100.79 17
 -1 -10 -7 49.99 9.9
 -1 -10 -7 52.99 13.3
 -1 -10 -7 39.5 8.9
 1 10 7 0.3 23.8
 1 10 7 61.49 24.8
 1 10 7 63.49 12.5
 -2 -10 -7 430.46 43.3
 -2 -10 -7 382.46 46.5
 2 10 7 403.26 50.59
 2 10 7 393.86 56.29
 2 9 -8 19.8 30.9
 1 9 -8 129.79 46.1
 -1 -9 8 111.79 16.9
 -1 -9 8 115.29 20.6
 -1 -9 8 90.59 22
 -1 -9 8 110.09 16.3
 0 9 -8 236.18 57.19
 0 -9 8 311.47 29.5
 0 -9 8 264.37 28.6
 0 -9 8 217.98 36.2
 -1 9 -8 70.19 33.7
 1 -9 8 68.89 22.4
 1 -9 8 71.69 12.5
 1 -9 8 61.49 12.2
 -2 9 -8 504.95 117.39
 2 -9 8 528.15 63.89
 2 -9 8 484.85 50.79
 4 8 -8 240.98 30
 -4 -8 8 241.88 27.3
 -4 -8 8 241.08 26.3
 3 8 -8 1.4 21.1
 3 8 -8 -4.8 8
 -3 -8 8 4.1 5.6
 2 8 -8 62.29 13.1
 2 8 -8 70.89 28.7
 -2 -8 8 38.4 8.1
 -2 -8 8 39.4 9.5
 -2 -8 8 38.8 13.7
 1 8 -8 -15.9 20.2
 -1 -8 8 -1 8
 -1 -8 8 4.3 4.5
 -1 -8 8 5.4 5.3
 -1 -8 8 3.6 5.9
 0 8 -8 222.58 49.7
 0 -8 8 215.28 26.5
 0 -8 8 275.97 25.9
 0 -8 8 214.58 32.9
 -1 8 -8 192.98 47.3
 1 -8 8 245.88 24.7
 1 -8 8 212.78 23.9
 1 -8 8 221.48 33.3
 -2 8 -8 266.67 56.39
 2 -8 8 346.67 33.3
 2 -8 8 294.07 32.2
 2 -8 8 324.87 43.6
 -3 8 -8 646.84 103.39
 3 -8 8 792.52 78.09
 3 -8 8 898.11 92.89
 3 -8 8 810.92 79.79
 -4 8 -8 -6.3 25.4
 -4 8 -8 -0.1 8.1
 -4 8 -8 1.1 9
 4 -8 8 2.9 12.6
 4 -8 8 3.5 5.3
 4 -8 8 1.1 5.6
 -5 8 -8 477.65 106.69
 5 -8 8 495.95 49.7
 5 -8 8 498.65 50.99
 5 7 -8 289.37 32.7
 -5 -7 8 327.67 30.4
 -5 -7 8 279.27 34.1
 -5 -7 8 215.98 37
 -5 -7 8 365.66 31.8
 4 7 -8 157.58 21.1
 -4 -7 8 155.08 19.1
 -4 -7 8 175.28 18.6
 3 7 -8 177.18 20.5
 -3 -7 8 140.89 17.8
 -3 -7 8 147.09 17.1
 2 7 -8 18.1 17.5
 2 7 -8 11.4 6.4
 -2 -7 8 4.2 6.5
 -2 -7 8 12.7 4.4
 -2 -7 8 3.3 4
 1 7 -8 129.59 33.6
 -1 -7 8 100.79 12.9
 -1 -7 8 96.59 18.3
 -1 -7 8 92.09 13.6
 -1 -7 8 124.69 14
 0 7 -8 5.6 15.7
 0 -7 8 5.8 8
 0 -7 8 5.7 4.3
 0 -7 8 7.3 3.9
 -1 7 -8 750.22 104.19
 1 -7 8 847.22 84.69
 1 -7 8 903.71 85.39
 1 -7 8 946.51 94.89
 -2 7 -8 261.67 51.19
 2 -7 8 325.87 42.1
 2 -7 8 300.17 31.6
 2 -7 8 302.27 30.7
 -3 7 -8 450.25 75.59
 3 -7 8 562.94 65.99
 3 -7 8 521.65 52.79
 3 -7 8 583.74 54.09
 -4 7 -8 514.95 69.79
 -4 7 -8 545.55 87.89
 4 -7 8 651.73 62.69
 4 -7 8 755.12 64.39
 4 -7 8 754.42 79.39
 -5 7 -8 151.98 79.99
 -5 7 -8 81.59 27.7
 5 -7 8 139.59 15.6
 5 -7 8 130.49 35.5
 5 -7 8 97.39 18.2
 5 -7 8 105.89 13.5
 -6 7 -8 183.88 57.09
 -6 7 -8 142.49 48.4
 6 -7 8 250.27 25.2
 6 -7 8 181.38 24.2
 6 -7 8 293.87 45.7
 6 -7 8 213.88 23.3
 6 6 -8 4.7 6.4
 -6 -6 8 5.3 3.9
 -6 -6 8 5.3 11.3
 -6 -6 8 0.5 20.4
 -6 -6 8 10.8 5.3
 5 6 -8 734.13 69.79
 -5 -6 8 643.94 67.79
 -5 -6 8 715.63 68.89
 4 6 -8 350.66 35.1
 -4 -6 8 368.36 33.9
 -4 -6 8 373.16 33.2
 -4 -6 8 260.37 41.9
 -4 -6 8 292.47 36.5
 3 6 -8 99.79 13.8
 -3 -6 8 102.79 15.7
 -3 -6 8 129.89 13
 -3 -6 8 83.49 12.5
 -3 -6 8 124.49 12.4
 -3 -6 8 97.29 14.4
 2 6 -8 195.88 35.4
 2 6 -8 118.79 16.2
 -2 -6 8 116.69 18.4
 -2 -6 8 132.99 14.6
 -2 -6 8 115.59 14.6
 1 6 -8 8.5 4.5
 1 6 -8 8.2 13.4
 -1 -6 8 0.9 5.5
 -1 -6 8 4.1 3.1
 0 6 -8 278.27 46.5
 0 -6 8 315.97 30.2
 0 -6 8 287.87 36.7
 0 -6 8 278.67 29.9
 -1 6 -8 13.6 15.2
 1 -6 8 2.5 3
 1 -6 8 2.2 2.9
 1 -6 8 2.9 7.1
 -2 6 -8 1261.07 154.18
 2 -6 8 1476.15 135.59
 2 -6 8 1321.67 134.49
 2 -6 8 1533.45 146.59
 -3 6 -8 52.39 15.6
 -3 6 -8 64.29 26.4
 3 -6 8 68.39 9.8
 3 -6 8 95.39 21.2
 3 -6 8 71.59 8.6
 -4 6 -8 988.8 131.79
 -4 6 -8 963.3 118.89
 4 -6 8 1220.68 109.59
 4 -6 8 1382.46 111.29
 4 -6 8 1096.29 110.59
 -5 6 -8 234.08 43.5
 -5 6 -8 266.57 54.09
 5 -6 8 327.87 29.6
 5 -6 8 250.27 30.2
 5 -6 8 338.87 31.2
 -6 6 -8 237.58 27.5
 -6 6 -8 207.68 53.79
 6 -6 8 256.07 29
 6 -6 8 259.97 27.8
 6 -6 8 319.97 29.7
 6 -6 8 364.56 49.4
 -7 6 -8 44.4 8.7
 -7 6 -8 34.6 29
 -7 6 -8 10 27.1
 7 -6 8 85.59 29
 7 -6 8 49.99 10.2
 7 -6 8 65.89 11.8
 7 5 -8 290.47 31.3
 -7 -5 8 295.77 29.5
 -7 -5 8 315.97 33
 -7 -5 8 215.08 57.99
 -7 -5 8 293.97 31.3
 6 5 -8 955.7 94.39
 -6 -5 8 912.11 92.29
 -6 -5 8 923.51 92.79
 -6 -5 8 1004.4 93.69
 5 5 -8 3.2 4.4
 -5 -5 8 4.8 3.5
 -5 -5 8 7.5 14.8
 -5 -5 8 6.7 3.3
 4 5 -8 845.32 78.09
 -4 -5 8 709.33 77.09
 -4 -5 8 821.22 76.69
 3 5 -8 127.89 14.5
 -3 -5 8 89.79 21.5
 -3 -5 8 118.19 13.5
 -3 -5 8 111.49 16.5
 -3 -5 8 110.19 15.3
 -3 -5 8 137.19 13.3
 2 5 -8 219.08 22.5
 -2 -5 8 203.28 22.5
 -2 -5 8 176.28 25.2
 -2 -5 8 215.18 21.1
 -2 -5 8 215.28 25.5
 -2 -5 8 182.88 21.2
 1 5 -8 5.2 11.4
 1 5 -8 14.9 4.8
 -1 -5 8 7.7 6.2
 -1 -5 8 6.2 2.7
 0 5 -8 17.6 13.2
 0 -5 8 12.3 3.9
 0 -5 8 16.6 4
 0 -5 8 20.5 10
 -1 5 -8 690.73 85.49
 1 -5 8 726.83 68.09
 1 -5 8 775.32 78.19
 1 -5 8 619.74 68.49
 -2 5 -8 62.39 22.7
 -2 5 -8 86.69 15.1
 2 -5 8 100.79 11
 2 -5 8 96.09 19.8
 2 -5 8 80.59 9.4
 -3 5 -8 1911.11 202.48
 3 -5 8 2142.99 194.28
 -4 5 -8 12.5 12.1
 -4 5 -8 12.5 14
 4 -5 8 24.2 5.1
 4 -5 8 18.9 12
 4 -5 8 8.9 3.7
 4 -5 8 15.5 3.7
 -5 5 -8 1399.76 162.38
 -5 5 -8 1469.45 138.19
 -5 5 -8 1212.08 153.48
 5 -5 8 1635.94 138.39
 5 -5 8 1413.76 139.29
 -6 5 -8 7.6 29.6
 -6 5 -8 28.9 5.8
 -6 5 -8 20.3 19.2
 6 -5 8 34.9 6.8
 6 -5 8 38.9 17.6
 6 -5 8 21.6 6.2
 -7 5 -8 70.29 35
 -7 5 -8 83.29 13.1
 -7 5 -8 112.49 41.3
 7 -5 8 105.39 14.2
 7 -5 8 133.59 34.2
 7 -5 8 109.89 14.4
 -8 5 -8 0.6 6.6
 -8 5 -8 9.4 28.9
 -8 5 -8 -6.5 33.3
 8 -5 8 9.6 6.8
 8 -5 8 0.9 19.7
 8 -5 8 -0.5 6.7
 8 4 -8 402.86 43.1
 8 4 -8 482.25 48.9
 -8 -4 8 494.65 46.1
 -8 -4 8 348.87 78.59
 -8 -4 8 397.06 43.5
 7 4 -8 362.66 37.7
 -7 -4 8 477.35 40.4
 -7 -4 8 333.97 36.3
 -7 -4 8 292.37 64.99
 -7 -4 8 393.26 38.5
 6 4 -8 582.04 55.89
 -6 -4 8 600.54 56.99
 -6 -4 8 491.85 54.59
 -6 -4 8 603.24 56.29
 5 4 -8 1206.88 124.59
 -5 -4 8 1369.46 124.99
 -5 -4 8 1379.86 125.39
 -5 -4 8 1214.18 123.69
 4 4 -8 329.37 30.8
 -4 -4 8 300.17 29.6
 -4 -4 8 264.57 30.1
 3 4 -8 851.91 82.89
 -3 -4 8 768.22 82.29
 -3 -4 8 911.61 85.19
 -3 -4 8 851.81 81.99
 2 4 -8 17.5 12.5
 2 4 -8 6.8 3.3
 -2 -4 8 5.6 5.2
 -2 -4 8 6.4 2.5
 -2 -4 8 8 4.5
 -2 -4 8 12.6 3
 1 4 -8 9.5 10.7
 -1 -4 8 6.1 5.1
 -1 -4 8 4.2 2.2
 -1 -4 8 10.2 4.6
 0 4 -8 212.08 35.2
 0 -4 8 234.48 26.3
 0 -4 8 198.68 28.4
 0 -4 8 189.78 21.5
 -1 4 -8 1523.05 147.09
 -1 4 -8 1364.36 158.68
 1 -4 8 1423.96 144.29
 1 -4 8 1684.63 154.68
 -2 4 -8 501.95 72.19
 2 -4 8 542.45 57.69
 2 -4 8 691.13 59.29
 2 -4 8 689.23 70.49
 -3 4 -8 590.14 83.79
 -3 4 -8 665.83 78.29
 3 -4 8 761.32 68.79
 3 -4 8 798.22 70.39
 -4 4 -8 1435.56 172.58
 -4 4 -8 1495.35 168.18
 -4 4 -8 1584.74 154.68
 4 -4 8 1882.51 156.08
 4 -4 8 1764.52 154.48
 4 -4 8 1476.75 155.08
 -5 4 -8 145.39 14.1
 -5 4 -8 101.69 30
 -5 4 -8 117.89 31.6
 5 -4 8 128.99 14.8
 -6 4 -8 813.62 108.09
 -6 4 -8 767.32 108.59
 -6 4 -8 987.6 86.69
 6 -4 8 1052.59 88.09
 6 -4 8 783.52 87.19
 -7 4 -8 4.8 4.6
 -7 4 -8 3.8 22.8
 -7 4 -8 -0.3 15.8
 7 -4 8 2.4 4.3
 7 -4 8 4.1 16.2
 7 -4 8 3.1 4.7
 -8 4 -8 22.1 34.4
 -8 4 -8 43 8.8
 -8 4 -8 28.8 27.7
 8 -4 8 43 8.8
 8 -4 8 15.8 7.6
 8 -4 8 46.9 24.5
 8 3 -8 12.2 12.6
 8 3 -8 19 5.4
 -8 -3 8 5.7 6.5
 -8 -3 8 11.4 7
 7 3 -8 879.71 100.59
 7 3 -8 1071.49 97.79
 -7 -3 8 1028.2 98.69
 -7 -3 8 1025.4 99.49
 6 3 -8 494.55 60.99
 6 3 -8 619.24 58.89
 -6 -3 8 612.74 58.09
 -6 -3 8 647.24 60.39
 -6 -3 8 604.44 59.59
 5 3 -8 1425.66 136.99
 -5 -3 8 1367.76 137.49
 -5 -3 8 1420.96 137.79
 -5 -3 8 1469.55 136.29
 4 3 -8 437.16 46.9
 -4 -3 8 453.05 47.3
 -4 -3 8 459.55 46.4
 -4 -3 8 499.15 47.2
 -4 -3 8 518.95 49
 3 3 -8 1064.29 99.89
 -3 -3 8 1052.89 99.19
 -3 -3 8 914.81 99.49
 -3 -3 8 1097.79 103.79
 2 3 -8 75.89 9.4
 -2 -3 8 81.69 13.9
 -2 -3 8 84.79 9
 -2 -3 8 66.59 8.6
 -2 -3 8 77.39 12.5
 1 3 -8 14.8 10.8
 -1 -3 8 10.7 5.1
 -1 -3 8 12.6 7.1
 -1 -3 8 10.2 2.4
 0 3 -8 895.11 93.19
 0 -3 8 819.62 86.19
 0 -3 8 724.33 77.59
 0 -3 8 811.32 81.99
 -1 3 -8 9.5 9.8
 -1 3 -8 2.1 4
 1 -3 8 0.9 4.4
 1 -3 8 2.2 7
 1 -3 8 4.2 2
 1 -3 8 6.2 1.5
 -2 3 -8 1482.95 177.58
 -2 3 -8 1884.61 172.68
 2 -3 8 1753.72 164.98
 -3 3 -8 245.38 38.6
 -3 3 -8 242.68 34.6
 3 -3 8 235.78 24.4
 -4 3 -8 1279.97 108.59
 -4 3 -8 1167.68 126.79
 -4 3 -8 958.4 122.09
 4 -3 8 1085.19 109.39
 -5 3 -8 748.93 93.69
 -5 3 -8 695.53 92.79
 -5 3 -8 879.61 75.49
 5 -3 8 742.03 76.09
 -6 3 -8 72.59 26.5
 -6 3 -8 71.89 27.8
 -6 3 -8 105.49 11.3
 6 -3 8 84.69 11.2
 -7 3 -8 490.15 76.59
 -7 3 -8 559.34 84.89
 7 -3 8 632.44 57.79
 -8 3 -8 -0.9 25.8
 -8 3 -8 5.5 18
 -8 3 -8 1.5 6.5
 8 -3 8 11.3 16.2
 8 -3 8 3.3 4.8
 -9 3 -8 -3.2 38.8
 -9 3 -8 -3.6 8.6
 -9 3 -8 9.7 27.4
 9 -3 8 14.2 20.4
 9 -3 8 3 6.7
 9 2 -8 28.4 11.6
 -9 -2 8 45.8 8.8
 8 2 -8 412.26 46.5
 -8 -2 8 417.96 49
 -8 -2 8 440.36 43.7
 7 2 -8 31.2 5.2
 7 2 -8 18.6 7.1
 -7 -2 8 20.9 5.3
 -7 -2 8 19.6 6.2
 6 2 -8 1614.24 161.78
 -6 -2 8 1747.43 163.48
 -6 -2 8 1721.43 162.88
 5 2 -8 50.49 6.4
 5 2 -8 40.7 8.4
 -5 -2 8 52.89 7.4
 -5 -2 8 37.8 9.2
 -5 -2 8 43.7 7.7
 -5 -2 8 48.4 7.6
 -5 -2 8 60.69 5.8
 4 2 -8 3106.69 284.07
 4 2 -8 2662.83 285.27
 -4 -2 8 3053.09 284.57
 -4 -2 8 3017.4 283.57
 -4 -2 8 3023.7 284.87
 3 2 -8 44.5 7.1
 3 2 -8 44.8 6.2
 -3 -2 8 46.6 10
 -3 -2 8 55.49 5.9
 -3 -2 8 56.39 6.5
 -3 -2 8 49.4 6.8
 -2 -2 8 546.95 58.79
 -2 -2 8 671.93 58.79
 -2 -2 8 633.34 65.49
 -2 -2 8 575.14 58.99
 -2 -2 8 616.04 63.79
 -1 -2 8 146.19 15.4
 -1 -2 8 178.48 23.2
 -1 -2 8 144.39 19.5
 -1 -2 8 140.79 15.4
 -1 -2 8 161.78 15.6
 0 2 -8 252.77 28.7
 0 -2 8 218.98 23.9
 0 -2 8 258.87 29.4
 0 -2 8 295.27 34.3
 0 -2 8 237.48 24.6
 -1 2 -8 1400.46 153.78
 -1 2 -8 1553.54 162.28
 1 -2 8 1518.45 158.98
 1 -2 8 1756.32 158.48
 -2 2 -8 97.59 22.5
 -2 2 -8 113.99 19.7
 2 -2 8 154.68 24.6
 -3 2 -8 1609.14 167.78
 3 -2 8 1644.84 156.08
 -4 2 -8 84.79 8.2
 -4 2 -8 53.99 20.1
 -4 2 -8 59.39 19.2
 4 -2 8 61.99 8.6
 4 -2 8 118.19 23.3
 -5 2 -8 1142.29 132.29
 -5 2 -8 1179.68 135.89
 5 -2 8 1275.47 116.79
 -6 2 -8 270.47 44.1
 -6 2 -8 241.68 48
 6 -2 8 271.77 28.2
 -7 2 -8 533.85 80.39
 -7 2 -8 470.15 69.99
 7 -2 8 539.25 52.49
 -8 2 -8 181.48 54.29
 -8 2 -8 256.57 25.1
 -8 2 -8 170.48 42
 8 -2 8 211.78 24.5
 -9 2 -8 0.8 33.8
 -9 2 -8 13.7 23.6
 -9 2 -8 31.4 9.4
 9 -2 8 61.49 24.9
 9 -2 8 31 9.5
 9 1 -8 52.29 13.8
 -9 -1 8 65.79 18.3
 -9 -1 8 69.49 11.2
 8 1 -8 281.97 32.5
 -8 -1 8 307.07 31.5
 -8 -1 8 277.87 30.1
 -8 -1 8 280.87 34.6
 7 1 -8 399.96 49
 -7 -1 8 500.85 47.8
 -7 -1 8 501.85 48.8
 -7 -1 8 487.75 51.29
 6 1 -8 385.16 42.4
 -6 -1 8 395.56 43.6
 -6 -1 8 464.05 41.4
 -6 -1 8 390.96 41.6
 5 1 -8 1767.42 170.98
 -5 -1 8 1855.51 170.48
 -5 -1 8 1817.32 169.98
 -5 -1 8 1653.03 171.88
 4 1 -8 147.29 16.7
 -4 -1 8 145.39 16.3
 -4 -1 8 157.08 16
 -4 -1 8 148.89 14.8
 3 1 -8 1863.71 189.38
 -3 -1 8 1853.81 189.08
 -3 -1 8 1946.71 188.78
 -3 -1 8 2209.08 188.18
 2 1 -8 403.16 38.7
 -2 -1 8 360.66 38.4
 -2 -1 8 386.66 43.6
 -2 -1 8 408.76 37.9
 -2 -1 8 394.96 38.2
 -1 -1 8 6.6 1.8
 -1 -1 8 8.8 1.8
 -1 -1 8 3.6 1.7
 -1 -1 8 8.5 5.5
 -1 -1 8 18.9 6.4
 0 1 -8 3.2 6.2
 0 -1 8 4 5.5
 0 -1 8 3.1 1.1
 0 -1 8 3.8 3.7
 -1 1 -8 515.85 63.39
 -1 1 -8 462.95 57.59
 1 -1 8 568.84 70.59
 1 -1 8 650.43 63.79
 -2 1 -8 2486.05 234.48
 2 -1 8 2237.18 224.48
 -3 1 -8 497.95 59.69
 -3 1 -8 544.55 47.4
 3 -1 8 428.06 47.7
 -4 1 -8 2206.38 185.98
 -4 1 -8 1882.91 202.08
 -4 1 -8 1643.24 197.98
 4 -1 8 1980.3 186.28
 -5 1 -8 208.78 17.9
 -5 1 -8 183.48 17.2
 -5 1 -8 107.79 30.3
 -5 1 -8 117.59 27.2
 5 -1 8 147.29 17.1
 -6 1 -8 1341.77 151.48
 6 -1 8 1470.95 136.89
 -7 1 -8 14.1 5.2
 -7 1 -8 4.9 20.2
 -7 1 -8 2.6 10.4
 -7 1 -8 14.9 5.2
 7 -1 8 23.9 16.7
 7 -1 8 11.4 5
 -8 1 -8 377.76 32.5
 -8 1 -8 246.78 59.79
 -8 1 -8 240.68 46.9
 8 -1 8 273.87 31.9
 -9 1 -8 -1.5 7.3
 -9 1 -8 9 19.2
 -9 1 -8 3 7.2
 9 -1 8 2.6 15.3
 9 -1 8 3 4.7
 9 0 -8 102.59 19
 -9 0 8 145.79 18.6
 -9 0 8 120.89 26.3
 -9 0 8 151.08 17.1
 8 0 -8 34 8.5
 -8 0 8 31.3 8
 -8 0 8 41.5 8.1
 -8 0 8 43.2 16.1
 7 0 -8 1075.69 105.49
 -7 0 8 1143.89 105.19
 -7 0 8 1071.29 104.09
 -7 0 8 1007.3 109.29
 6 0 -8 338.27 34.1
 -6 0 8 358.96 33.1
 -6 0 8 296.57 33.5
 -6 0 8 303.27 36.8
 5 0 -8 1152.88 119.49
 -5 0 8 1307.37 119.59
 -5 0 8 1269.77 118.79
 -5 0 8 1200.48 122.49
 4 0 -8 1400.36 142.39
 -4 0 8 1513.45 142.49
 -4 0 8 1518.55 141.89
 3 0 -8 16.1 4.3
 3 0 -8 12.5 3.3
 -3 0 8 13.2 2.8
 -3 0 8 15.7 3.7
 2 0 -8 1344.07 124.09
 2 0 -8 1259.07 124.79
 -2 0 8 1332.37 123.89
 -2 0 8 1298.37 124.39
 -2 0 8 1238.58 123.39
 1 0 -8 132.09 14.3
 -1 0 8 126.19 13.4
 -1 0 8 134.29 12.8
 -1 0 8 120.39 17.9
 0 0 -8 73.79 12.5
 0 0 -8 72.39 7.4
 0 0 8 60.69 7.1
 0 0 8 65.99 12
 -1 0 -8 213.68 20.7
 -1 0 -8 198.48 27.4
 1 0 8 206.38 20.6
 1 0 8 207.68 20.6
 1 0 8 208.68 27.7
 1 0 8 266.67 31.1
 -2 0 -8 748.03 77.19
 -2 0 -8 724.13 78.19
 -2 0 -8 673.03 66.49
 2 0 8 661.73 66.69
 -3 0 -8 1622.14 138.89
 -3 0 -8 1399.16 151.38
 -3 0 -8 1312.67 149.49
 3 0 8 1427.26 138.89
 -4 0 -8 1520.45 161.98
 -4 0 -8 1622.24 167.08
 4 0 8 1556.24 150.28
 -5 0 -8 1654.13 180.88
 -5 0 -8 1771.62 188.78
 5 0 8 1837.92 169.28
 -6 0 -8 425.76 57.79
 6 0 8 480.45 46.3
 -7 0 -8 620.14 98.49
 -7 0 -8 925.31 78.09
 7 0 8 766.62 78.29
 -8 0 -8 2.8 14
 -8 0 -8 3.5 22.2
 -8 0 -8 10.8 5.6
 8 0 8 14.6 13.9
 8 0 8 13.8 4.2
 8 0 8 2.6 5.8
 -9 0 -8 2.4 6.1
 -9 0 -8 2.2 7.2
 -9 0 -8 -0.1 17.2
 9 0 8 9.9 4.9
 9 0 8 9.4 15.1
 9 0 8 1.7 7.1
 9 -1 -8 5.8 9.3
 -9 1 8 7.5 14.4
 -9 1 8 -1.2 5.3
 -9 1 8 2.3 7.9
 8 -1 -8 508.05 57.59
 -8 1 8 607.14 56.59
 -8 1 8 527.75 64.79
 -8 1 8 612.64 57.89
 7 -1 -8 36.7 8.3
 -7 1 8 43.7 14.3
 -7 1 8 49.99 7.6
 -7 1 8 35.5 8.3
 6 -1 -8 1933.31 204.48
 -6 1 8 1982.6 209.68
 -6 1 8 2272.37 204.08
 -6 1 8 2325.17 205.08
 5 -1 -8 187.58 22.4
 5 -1 -8 188.58 21.5
 -5 1 8 197.28 26
 -5 1 8 218.78 22.1
 -5 1 8 214.58 21.2
 4 -1 -8 1799.62 186.18
 4 -1 -8 1856.61 185.18
 -4 1 8 2035.1 185.78
 -4 1 8 1921.01 189.78
 -4 1 8 2029.5 184.88
 3 -1 -8 639.84 64.69
 3 -1 -8 660.13 65.79
 -3 1 8 678.63 64.49
 -3 1 8 691.93 65.39
 2 -1 -8 955.7 100.79
 2 -1 -8 987 99.89
 -2 1 8 1110.59 99.39
 -2 1 8 1090.39 99.79
 -2 1 8 1033.1 106.69
 -2 1 8 1060.79 100.59
 1 -1 -8 739.53 65.79
 1 -1 -8 652.73 66.59
 -1 1 8 624.74 66.39
 -1 1 8 737.63 72.69
 -1 1 8 678.73 65.59
 0 -1 -8 265.37 32.5
 0 -1 -8 266.47 26.3
 0 1 8 262.87 32.2
 0 1 8 266.57 26.1
 -1 -1 -8 201.18 26.9
 -1 -1 -8 198.08 19.4
 -1 -1 -8 200.68 18.8
 1 1 8 187.58 19.3
 1 1 8 183.98 18.8
 1 1 8 201.48 26.5
 -2 -1 -8 141.89 24.1
 -2 -1 -8 152.28 15.1
 -2 -1 -8 138.79 15.4
 2 1 8 171.48 24.9
 2 1 8 141.39 15.3
 2 1 8 211.28 28.6
 -3 -1 -8 3268.07 329.97
 -3 -1 -8 3576.24 316.77
 3 1 8 3113.09 316.87
 -4 -1 -8 678.53 89.29
 -4 -1 -8 885.31 75.69
 4 1 8 742.73 75.79
 -5 -1 -8 1566.14 188.28
 5 1 8 1883.01 170.98
 5 1 8 1854.11 171.68
 -6 -1 -8 1114.99 98.89
 -6 -1 -8 774.42 115.89
 6 1 8 1135.09 98.39
 6 1 8 964.3 99.19
 -7 -1 -8 505.85 49.4
 -7 -1 -8 498.95 49.3
 7 1 8 488.15 48.7
 7 1 8 457.55 49.99
 -8 -1 -8 45.4 30
 -8 -1 -8 95.89 12.8
 -8 -1 -8 89.59 13.3
 8 1 8 87.09 11.9
 8 1 8 146.39 27.1
 8 1 8 82.79 14.1
 -9 -1 -8 86.69 14.8
 -9 -1 -8 110.99 15.8
 9 1 8 111.49 14
 9 1 8 105.79 25.2
 9 1 8 87.39 16.4
 9 -2 -8 17.6 9.2
 -9 2 8 17.1 17.9
 -9 2 8 10.7 8.3
 -9 2 8 16.8 6.5
 8 -2 -8 118.09 16.8
 -8 2 8 142.09 15.7
 -8 2 8 133.79 17.1
 -8 2 8 94.69 24.7
 7 -2 -8 760.52 78.79
 -7 2 8 863.51 78.29
 -7 2 8 749.13 86.99
 -7 2 8 800.52 79.19
 6 -2 -8 180.68 21.4
 6 -2 -8 178.08 20.1
 -6 2 8 148.39 25.5
 -6 2 8 204.78 19.7
 -6 2 8 191.78 20.7
 5 -2 -8 2194.98 213.18
 5 -2 -8 2255.97 211.88
 -5 2 8 1909.61 217.48
 -5 2 8 2266.27 211.48
 -5 2 8 2424.36 212.68
 4 -2 -8 39.5 7
 -4 2 8 47.1 5.5
 -4 2 8 28.1 9.5
 -4 2 8 31.6 6.2
 3 -2 -8 3131.09 316.37
 3 -2 -8 3041.9 317.37
 -3 2 8 3674.03 317.47
 -3 2 8 3431.96 316.27
 2 -2 -8 68.79 7.8
 2 -2 -8 80.09 9.2
 -2 2 8 74.69 14.3
 -2 2 8 75.29 8.8
 -2 2 8 74.09 7.5
 1 -2 -8 509.35 50.49
 1 -2 -8 535.15 51.69
 -1 2 8 519.45 50.69
 -1 2 8 553.24 51.49
 -1 2 8 526.65 57.69
 0 -2 -8 174.58 22.9
 0 -2 -8 162.08 16.2
 0 -2 -8 148.19 15
 0 2 8 157.78 15.9
 0 2 8 144.49 15.5
 -1 -2 -8 507.45 45.7
 -1 -2 -8 484.55 46.4
 -1 -2 -8 474.15 54.29
 1 2 8 445.46 53.39
 1 2 8 449.66 46.1
 -2 -2 -8 992.3 96.99
 -2 -2 -8 798.82 84.39
 -2 -2 -8 803.72 84.89
 2 2 8 845.22 84.39
 2 2 8 1044.5 98.29
 -3 -2 -8 351.86 47
 -3 -2 -8 352.46 34.2
 3 2 8 333.97 34.2
 3 2 8 347.17 34.4
 -4 -2 -8 2215.78 258.87
 -4 -2 -8 2811.02 244.98
 4 2 8 2764.82 244.98
 4 2 8 2410.16 245.08
 -5 -2 -8 28.4 5.3
 -5 -2 -8 14.6 12.2
 5 2 8 64.89 20.2
 5 2 8 28.1 5.3
 5 2 8 29.1 5.9
 5 2 8 86.69 36.1
 6 2 8 1706.63 169.18
 6 2 8 1785.92 168.18
 -7 -2 -8 67.59 29
 -7 -2 -8 101.99 12.2
 7 2 8 81.39 13.1
 7 2 8 98.99 11.8
 -8 -2 -8 493.35 50.69
 -8 -2 -8 596.04 51.39
 8 2 8 414.86 51.69
 8 2 8 486.65 49.99
 -9 -2 -8 10.7 32.6
 -9 -2 -8 28.4 8.7
 9 2 8 30.7 14.6
 9 2 8 24.2 6.7
 9 2 8 44.1 12.3
 9 -3 -8 -5 7.8
 -9 3 8 10.5 19.6
 8 -3 -8 -4.5 5.6
 -8 3 8 0.1 12.5
 -8 3 8 1.5 6.3
 7 -3 -8 329.27 37.9
 7 -3 -8 337.37 36.5
 -7 3 8 351.96 47
 -7 3 8 366.76 37.2
 6 -3 -8 805.22 75.69
 6 -3 -8 744.23 76.99
 -6 3 8 813.22 76.49
 -6 3 8 703.03 84.19
 5 -3 -8 624.04 64.09
 5 -3 -8 547.05 62.09
 -5 3 8 731.03 63.79
 -5 3 8 662.63 71.39
 4 -3 -8 2601.74 243.18
 4 -3 -8 2466.05 244.48
 4 -3 -8 2430.76 245.68
 -4 3 8 2433.06 252.07
 -4 3 8 2856.41 245.78
 3 -3 -8 773.42 76.79
 3 -3 -8 852.91 76.09
 3 -3 -8 816.12 78.19
 -3 3 8 798.72 77.79
 -3 3 8 770.72 83.79
 -3 3 8 758.62 76.19
 2 -3 -8 2763.52 263.37
 2 -3 -8 2784.92 261.77
 2 -3 -8 2902.51 262.17
 -2 3 8 2497.35 269.67
 -2 3 8 2693.23 261.97
 -2 3 8 2846.12 263.17
 1 -3 -8 71.39 8.8
 1 -3 -8 79.89 7.7
 -1 3 8 68.89 7.8
 -1 3 8 71.29 14.2
 -1 3 8 59.49 8.3
 0 -3 -8 91.39 9.8
 0 -3 -8 96.89 17.1
 0 -3 -8 94.09 10.7
 0 3 8 100.19 10.7
 0 3 8 93.29 10
 0 3 8 85.29 16.3
 -1 -3 -8 16.7 2.9
 -1 -3 -8 16.1 8.9
 -1 -3 -8 14.5 2.8
 -1 -3 -8 21.6 4
 1 3 8 11.5 2.6
 1 3 8 14.2 8
 -2 -3 -8 1144.69 114.29
 -2 -3 -8 1132.29 114.99
 -2 -3 -8 1186.58 125.79
 -2 -3 -8 1236.98 114.39
 2 3 8 1376.56 128.39
 2 3 8 1105.79 114.49
 -3 -3 -8 824.52 72.89
 -3 -3 -8 768.92 86.89
 3 3 8 686.63 72.79
 3 3 8 723.93 72.79
 -4 -3 -8 935.41 121.99
 -4 -3 -8 1249.88 109.19
 4 3 8 1149.39 109.29
 4 3 8 1142.69 108.99
 -5 -3 -8 1565.74 136.99
 5 3 8 1397.16 136.59
 5 3 8 1284.47 136.99
 -6 -3 -8 20.5 5.3
 -6 -3 -8 15 17.1
 6 3 8 18.1 4.7
 6 3 8 47.5 18.5
 6 3 8 15.1 5.2
 7 3 8 969.1 98.79
 7 3 8 1020.4 97.29
 -8 -3 -8 30.9 7.6
 -8 -3 -8 12.5 24
 8 3 8 27.2 9.3
 8 3 8 58.19 16.9
 8 3 8 47.4 8.2
 -9 -3 -8 275.17 28.8
 -9 -3 -8 258.97 28.9
 9 3 8 232.38 27.8
 9 3 8 245.78 31.1
 8 -4 -8 38 10.1
 8 -4 -8 47.9 12.8
 -8 4 8 66.49 25.7
 -8 4 8 36.2 10.1
 7 -4 -8 1.7 4.7
 7 -4 -8 -2.2 7
 -7 4 8 5.9 6.4
 -7 4 8 -2.5 11.2
 6 -4 -8 884.21 92.19
 6 -4 -8 874.01 90.79
 -6 4 8 1046.5 92.19
 -6 4 8 916.21 102.69
 5 -4 -8 142.09 14.2
 5 -4 -8 136.09 16
 5 -4 -8 144.89 17.9
 -5 4 8 130.39 36.2
 -5 4 8 168.78 18.2
 4 -4 -8 2087.99 210.88
 4 -4 -8 2123.99 209.58
 -4 4 8 2068.49 218.78
 -4 4 8 2482.75 210.98
 3 -4 -8 1899.91 172.88
 3 -4 -8 1706.43 173.48
 3 -4 -8 1855.51 174.98
 -3 4 8 1578.84 172.98
 -3 4 8 1839.92 182.58
 -3 4 8 1879.71 174.58
 -3 4 8 1960.4 184.28
 2 -4 -8 1368.86 126.79
 2 -4 -8 1410.16 127.19
 2 -4 -8 1326.97 128.39
 -2 4 8 1228.18 135.39
 -2 4 8 1274.67 126.99
 -2 4 8 1331.47 135.19
 1 -4 -8 908.71 83.99
 1 -4 -8 897.91 85.09
 -1 4 8 880.91 92.49
 -1 4 8 894.11 84.99
 -1 4 8 787.12 83.99
 0 -4 -8 138.89 16.1
 0 -4 -8 149.79 15.3
 0 -4 -8 145.99 22.6
 0 4 8 154.58 15.6
 0 4 8 158.58 16.3
 0 4 8 136.59 22.7
 -1 -4 -8 106.19 19
 -1 -4 -8 93.59 10.4
 -1 -4 -8 103.39 10.6
 -1 -4 -8 91.39 11.2
 1 4 8 93.09 18.7
 1 4 8 81.29 10.5
 -2 -4 -8 54.39 15.4
 -2 -4 -8 53.69 6.9
 -2 -4 -8 46.4 7.7
 -2 -4 -8 62.89 7.1
 2 4 8 67.29 17.9
 2 4 8 46.3 6.9
 -3 -4 -8 1794.52 194.18
 -3 -4 -8 1909.31 180.08
 -3 -4 -8 2185.58 180.58
 3 4 8 1618.64 180.18
 -4 -4 -8 390.66 32.8
 -4 -4 -8 254.77 44.9
 4 4 8 290.87 32.1
 4 4 8 317.57 32.5
 -5 -4 -8 597.34 51.79
 5 4 8 456.85 50.89
 5 4 8 492.65 51.69
 -6 -4 -8 559.14 49.6
 6 4 8 486.45 49
 6 4 8 415.66 49.6
 -7 -4 -8 348.37 32.4
 7 4 8 254.77 32.6
 7 4 8 293.77 31.5
 -8 -4 -8 737.33 67.39
 8 4 8 671.63 66.59
 8 4 8 579.44 68.39
 -9 -4 -8 11.7 7
 -9 -4 -8 4.6 28.3
 9 4 8 7.5 6.8
 9 4 8 9.3 10.1
 8 -5 -8 26.4 9.9
 8 -5 -8 23 11.7
 -8 5 8 14.1 9.7
 -8 5 8 19.1 33.6
 7 -5 -8 386.16 41.7
 7 -5 -8 379.66 39.4
 -7 5 8 409.16 40.9
 -7 5 8 313.17 53.59
 6 -5 -8 179.68 17.5
 6 -5 -8 191.28 22.3
 6 -5 -8 164.28 19.9
 -6 5 8 177.58 21.8
 -6 5 8 151.48 31.4
 5 -5 -8 1960.1 193.98
 5 -5 -8 1940.91 195.28
 5 -5 -8 2128.29 192.48
 -5 5 8 2195.18 195.38
 -5 5 8 1835.92 205.88
 4 -5 -8 51.29 8
 4 -5 -8 71.59 10.1
 4 -5 -8 51.99 6.9
 -4 5 8 71.29 10
 -4 5 8 50.29 17.2
 -4 5 8 75.69 18.3
 3 -5 -8 1007.4 94.59
 3 -5 -8 960.7 96.49
 3 -5 -8 1015.1 95.29
 -3 5 8 965.1 105.29
 -3 5 8 1005.5 106.09
 -3 5 8 892.21 94.79
 -3 5 8 1046.4 96.39
 2 -5 -8 549.45 49.99
 2 -5 -8 472.05 51.19
 -2 5 8 481.65 58.69
 -2 5 8 549.25 51.39
 -2 5 8 484.45 59.09
 -2 5 8 520.85 50.29
 1 -5 -8 431.16 40.3
 1 -5 -8 373.06 41.3
 -1 5 8 410.86 40.6
 -1 5 8 458.45 41.8
 -1 5 8 398.86 48.1
 -1 5 8 379.66 48.6
 0 -5 -8 518.35 60.69
 0 -5 -8 562.84 52.89
 0 -5 -8 531.45 53.89
 0 5 8 529.45 53.19
 0 5 8 560.64 62.39
 -1 -5 -8 14.9 4.3
 -1 -5 -8 10.4 3.3
 -1 -5 -8 15.8 9.5
 -1 -5 -8 14.6 3.5
 1 5 8 13.4 9.4
 1 5 8 7.7 3
 -2 -5 -8 147.69 17.5
 -2 -5 -8 169.68 16.5
 -2 -5 -8 150.98 16.2
 -2 -5 -8 146.49 26.2
 2 5 8 194.38 31.7
 2 5 8 117.49 16.1
 -3 -5 -8 28.8 6.6
 -3 -5 -8 29.3 5.5
 -3 -5 -8 33.7 6
 -3 -5 -8 29.4 14.5
 3 5 8 66.79 26.9
 3 5 8 44.4 6.4
 -4 -5 -8 1579.24 144.19
 -4 -5 -8 1678.93 143.89
 -4 -5 -8 1257.27 157.68
 4 5 8 1418.76 143.99
 -5 -5 -8 22.9 16.8
 -5 -5 -8 43.8 7.7
 5 5 8 45.7 9.3
 5 5 8 37.4 7.7
 5 5 8 77.69 21.1
 5 5 8 92.39 38.5
 -6 -5 -8 1774.72 153.38
 6 5 8 1526.55 152.68
 6 5 8 1429.56 153.48
 -7 -5 -8 404.86 37.4
 7 5 8 297.07 37.9
 7 5 8 341.57 36.7
 -8 -5 -8 146.79 47.3
 8 5 8 236.98 24.5
 8 5 8 230.48 29.9
 7 -6 -8 195.18 29.9
 7 -6 -8 195.48 24.4
 -7 6 8 181.38 64.49
 -7 6 8 259.77 27.7
 6 -6 -8 546.95 50.89
 6 -6 -8 531.15 53.19
 6 -6 -8 511.95 54.79
 -6 6 8 545.35 54.69
 -6 6 8 447.26 68.19
 5 -6 -8 477.55 44.2
 5 -6 -8 412.16 46.9
 5 -6 -8 413.96 45.6
 -5 6 8 407.06 58.99
 -5 6 8 477.45 59.69
 -5 6 8 502.85 47.5
 4 -6 -8 1226.28 111.69
 4 -6 -8 1119.69 114.09
 4 -6 -8 1114.39 112.59
 -4 6 8 1103.59 112.09
 -4 6 8 1195.08 125.79
 -4 6 8 1226.88 114.19
 -4 6 8 1136.19 126.09
 3 -6 -8 41.9 6.5
 3 -6 -8 39.1 5.9
 3 -6 -8 28.3 7.2
 -3 6 8 43.8 16.9
 -3 6 8 46.9 16.6
 -3 6 8 50.19 8.8
 -3 6 8 36.6 6.4
 2 -6 -8 735.43 76.49
 2 -6 -8 830.62 74.79
 -2 6 8 805.52 76.59
 -2 6 8 736.53 89.99
 -2 6 8 711.53 75.09
 -2 6 8 788.72 85.79
 1 -6 -8 159.58 17.4
 1 -6 -8 153.18 18.6
 -1 6 8 149.59 17.8
 -1 6 8 205.48 19.5
 -1 6 8 169.48 26.4
 -1 6 8 158.98 26.1
 0 -6 -8 422.66 44.5
 0 -6 -8 435.36 43.4
 0 6 8 421.76 43.9
 0 6 8 463.05 54.09
 0 6 8 448.26 52.09
 -1 -6 -8 91.79 12.4
 -1 -6 -8 88.89 18.8
 -1 -6 -8 97.69 11.4
 -1 -6 -8 90.19 11.1
 1 6 8 109.19 22.7
 1 6 8 97.69 11.8
 1 6 8 92.69 17.8
 -2 -6 -8 13.4 3.5
 -2 -6 -8 16.6 4.4
 -2 -6 -8 18.1 11.9
 -2 -6 -8 14.1 5.3
 2 6 8 18.4 16.3
 2 6 8 14.8 7.5
 2 6 8 11 4.1
 -3 -6 -8 459.65 45.3
 -3 -6 -8 418.66 46.8
 -3 -6 -8 460.65 58.39
 -3 -6 -8 483.85 45.7
 3 6 8 431.46 45.7
 -4 -6 -8 7.5 3.6
 -4 -6 -8 13.6 13.5
 -4 -6 -8 9.8 4.6
 4 6 8 8.4 4.4
 4 6 8 19 22.6
 -5 -6 -8 2350.96 225.58
 -5 -6 -8 2613.24 226.48
 5 6 8 2085.09 225.88
 -6 -6 -8 5.8 16.1
 -6 -6 -8 9.8 5.3
 6 6 8 15.9 13.8
 6 6 8 8.1 5.7
 6 6 8 9.8 6.5
 -7 -6 -8 1162.68 98.99
 7 6 8 842.02 97.59
 -8 -6 -8 20.2 8
 -8 -6 -8 5.8 23.1
 8 6 8 5.6 7.3
 8 6 8 17.8 10.7
 6 -7 -8 393.36 45.2
 6 -7 -8 478.05 43.3
 6 -7 -8 383.76 47.8
 -6 7 8 606.04 59.69
 -6 7 8 424.26 62.89
 -6 7 8 407.66 65.59
 5 -7 -8 267.07 32.9
 5 -7 -8 305.17 29.7
 5 -7 -8 275.07 31.2
 -5 7 8 325.47 33.6
 -5 7 8 281.67 48.6
 -5 7 8 294.57 47
 4 -7 -8 863.11 75.59
 4 -7 -8 724.73 76.29
 4 -7 -8 764.92 77.99
 -4 7 8 783.12 90.59
 -4 7 8 691.43 75.99
 -4 7 8 736.53 91.99
 -4 7 8 863.31 78.29
 3 -7 -8 850.71 89.99
 3 -7 -8 943.01 88.19
 3 -7 -8 892.91 88.79
 -3 7 8 874.41 102.59
 -3 7 8 970.4 102.29
 -3 7 8 1027.1 90.79
 -3 7 8 817.42 88.69
 2 -7 -8 403.26 47.9
 2 -7 -8 501.15 46.7
 -2 7 8 471.85 59.29
 -2 7 8 523.75 48.9
 -2 7 8 456.35 47.4
 -2 7 8 465.35 58.19
 1 -7 -8 1175.38 105.79
 1 -7 -8 1030.7 106.89
 -1 7 8 1078.69 117.19
 -1 7 8 1055.99 106.29
 -1 7 8 1101.79 116.99
 0 -7 -8 12.7 5.5
 0 -7 -8 19 4.6
 0 7 8 23.1 5.5
 0 7 8 24.7 12.2
 0 7 8 15.7 10.4
 -1 -7 -8 16.7 6.2
 -1 -7 -8 19 4.7
 -1 -7 -8 8.8 3.2
 -1 -7 -8 12.9 9.6
 1 7 8 25.4 15.7
 1 7 8 8.3 3.8
 1 7 8 12.1 8.8
 -2 -7 -8 28.5 5.6
 -2 -7 -8 17 11.1
 -2 -7 -8 18.6 5.5
 -2 -7 -8 10.3 5.9
 2 7 8 27.1 20.8
 2 7 8 24.2 10.3
 2 7 8 17.8 5.7
 -3 -7 -8 134.39 18.9
 -3 -7 -8 166.58 17.3
 -3 -7 -8 128.39 27.6
 -3 -7 -8 163.28 17
 3 7 8 139.29 22.5
 3 7 8 135.69 17.4
 -4 -7 -8 279.47 46.7
 -4 -7 -8 358.96 34.1
 -4 -7 -8 269.07 35.5
 -4 -7 -8 369.26 34.7
 4 7 8 352.66 39.4
 4 7 8 302.27 34.6
 -5 -7 -8 517.55 49.5
 -5 -7 -8 525.35 50.19
 5 7 8 469.85 52.99
 5 7 8 444.56 49.9
 -6 -7 -8 1057.09 97.69
 -6 -7 -8 963.8 96.49
 6 7 8 1017.1 98.89
 6 7 8 884.91 97.29
 -7 -7 -8 140.29 17.4
 -7 -7 -8 64.19 30.2
 7 7 8 117.99 17.1
 5 -8 -8 503.65 48.5
 5 -8 -8 393.06 57.19
 5 -8 -8 439.96 49.7
 -5 8 8 556.14 69.89
 -5 8 8 454.35 71.49
 -5 8 8 540.85 53.59
 4 -8 -8 135.69 18.9
 4 -8 -8 164.58 18.3
 4 -8 -8 138.39 21.5
 -4 8 8 210.28 22.6
 -4 8 8 181.58 36.7
 -4 8 8 176.58 38.4
 3 -8 -8 1002.9 106.39
 3 -8 -8 1134.29 104.59
 -3 8 8 954.7 105.29
 -3 8 8 1043.2 122.09
 -3 8 8 1104.59 119.19
 -3 8 8 1231.38 107.39
 2 -8 -8 764.92 72.59
 2 -8 -8 709.43 74.29
 -2 8 8 763.32 88.69
 -2 8 8 791.12 86.19
 -2 8 8 670.63 73.29
 1 -8 -8 297.27 33.8
 1 -8 -8 330.87 32.3
 -1 8 8 270.67 33
 -1 8 8 323.77 45.6
 -1 8 8 337.57 45.5
 0 -8 -8 180.68 19.7
 0 -8 -8 160.68 21.4
 0 8 8 166.08 30
 0 8 8 166.68 20.6
 0 8 8 221.78 34.5
 -1 -8 -8 13.9 5
 -1 -8 -8 21.4 5.5
 -1 -8 -8 12 6.1
 1 8 8 12.9 5.1
 1 8 8 10.6 10
 1 8 8 37.3 19.4
 -2 -8 -8 46.6 8.1
 -2 -8 -8 33.3 13.6
 -2 -8 -8 47 10.9
 -2 -8 -8 49.4 8.9
 2 8 8 73.69 30
 2 8 8 39.3 8.3
 2 8 8 43.7 16
 -3 -8 -8 38.8 15.5
 -3 -8 -8 57.39 11.9
 -3 -8 -8 50.49 8.7
 -3 -8 -8 55.19 9.7
 3 8 8 51.29 15.6
 3 8 8 67.89 33
 3 8 8 37.4 8.6
 -4 -8 -8 394.66 61.69
 -4 -8 -8 550.54 51.69
 -4 -8 -8 586.74 52.39
 -4 -8 -8 473.55 53.79
 4 8 8 526.45 52.89
 4 8 8 519.55 57.79
 -5 -8 -8 39.1 10.8
 -5 -8 -8 33.9 18.9
 -5 -8 -8 71.99 10.7
 -5 -8 -8 60.69 10.9
 5 8 8 50.39 15.4
 5 8 8 33.6 14.9
 -6 -8 -8 288.97 35.2
 -6 -8 -8 319.87 53.09
 4 -9 -8 835.52 75.79
 4 -9 -8 701.13 78.49
 -4 9 8 737.93 93.39
 -4 9 8 726.53 99.69
 -4 9 8 802.92 78.89
 3 -9 -8 17.4 6
 -3 9 8 0 17.7
 -3 9 8 2.5 6.9
 -3 9 8 9.1 19.4
 2 -9 -8 892.01 96.19
 2 -9 -8 1098.89 94.59
 -2 9 8 1033.9 109.29
 -2 9 8 889.31 112.09
 -2 9 8 875.51 95.49
 1 -9 -8 145.49 17.7
 1 -9 -8 150.78 21
 -1 9 8 151.98 19.9
 -1 9 8 154.58 34.3
 -1 9 8 150.68 32.9
 0 -9 -8 226.88 28.8
 0 -9 -8 258.37 26.8
 0 9 8 273.87 45.3
 0 9 8 239.18 39.8
 0 9 8 241.48 28.8
 -1 -9 -8 37.3 7.9
 -1 -9 -8 42.4 10.8
 -1 -9 -8 24.1 6.2
 1 9 8 19.9 14.7
 1 9 8 18.3 7.3
 1 9 8 70.19 30.4
 -2 -9 -8 17.3 6.6
 -2 -9 -8 27.4 6.8
 -2 -9 -8 25.8 10.7
 2 9 8 29.4 15.7
 2 9 8 24.9 8.6
 2 9 8 44.4 28
 -3 -9 -8 146.19 22.3
 -3 -9 -8 159.88 18.3
 -3 -9 -8 113.39 25.8
 -3 -9 -8 150.58 17.7
 3 9 8 125.29 26.6
 3 9 8 120.29 19.3
 3 9 8 222.78 55.39
 -4 -9 -8 84.89 16.3
 -4 -9 -8 74.69 24.4
 -4 -9 -8 77.99 12.6
 4 9 8 89.19 22.8
 4 9 8 61.59 12.9
 -5 -9 -8 431.86 45.9
 2 -10 -8 5.6 5.9
 2 -10 -8 7.5 10.1
 -2 10 8 4.9 20.6
 -2 10 8 9.9 23
 -2 10 8 9.2 9.1
 1 -10 -8 573.54 55.99
 1 -10 -8 518.75 58.69
 -1 10 8 510.15 57.79
 -1 10 8 606.74 77.99
 0 -10 -8 5.7 5.7
 0 -10 -8 14.7 10.6
 0 10 8 2.6 8.6
 0 10 8 2 24.4
 0 10 8 11.3 18.7
 -1 -10 -8 74.19 15.9
 -1 -10 -8 81.99 14.5
 -1 -10 -8 99.29 13.6
 1 10 8 81.99 29.6
 1 10 8 61.39 14.2
 -2 -10 -8 14.6 7.7
 -2 -10 -8 22.6 14.9
 2 10 8 13.9 17.4
 2 10 8 13.4 13.8
 2 10 8 3 29.6
 1 9 -9 96.79 41.3
 -1 -9 9 63.69 12.3
 -1 -9 9 68.39 20.3
 0 9 -9 6.7 29.6
 0 -9 9 8.7 11.7
 0 -9 9 -3 6.8
 -1 9 -9 30.7 31.4
 1 -9 9 25.8 15.1
 1 -9 9 17.4 7.4
 4 8 -9 32.6 11.3
 -4 -8 9 46.3 8.9
 -3 -8 9 835.42 83.39
 -3 -8 9 863.41 84.49
 2 8 -9 185.88 46.4
 -2 -8 9 99.69 15.9
 -2 -8 9 131.09 16.9
 -2 -8 9 121.89 21
 1 8 -9 235.08 49.3
 -1 -8 9 215.68 23.4
 -1 -8 9 171.18 27.4
 -1 -8 9 199.48 21.7
 -1 -8 9 162.88 21.5
 0 8 -9 100.89 35.6
 0 -8 9 102.99 13.6
 0 -8 9 92.49 21.2
 -1 8 -9 16.5 23.7
 1 -8 9 3.8 9.7
 1 -8 9 14 6.5
 1 -8 9 18.1 5.7
 -2 8 -9 4.9 20.4
 2 -8 9 3.1 5.3
 2 -8 9 6 5
 2 -8 9 0.3 10
 -3 8 -9 61.29 31.6
 3 -8 9 86.79 11.7
 3 -8 9 45.8 19.1
 3 -8 9 63.19 10.1
 -4 8 -9 378.16 76.39
 4 -8 9 414.76 43.8
 4 -8 9 457.85 45.5
 4 -8 9 490.95 61.59
 5 7 -9 316.67 31.1
 -5 -7 9 195.58 35
 -5 -7 9 294.97 28.9
 -5 -7 9 239.78 31.5
 -5 -7 9 305.67 27.8
 4 7 -9 641.54 76.19
 -4 -7 9 873.11 77.29
 -4 -7 9 764.92 74.49
 3 7 -9 46.1 9.8
 -3 -7 9 43 8.3
 -3 -7 9 27.2 6.6
 -3 -7 9 35 10.7
 -2 -7 9 902.01 92.89
 -2 -7 9 977.2 97.99
 -2 -7 9 979.6 93.89
 1 7 -9 7.7 18.3
 -1 -7 9 3 4.6
 -1 -7 9 6.3 4.9
 -1 -7 9 8.5 3.7
 -1 -7 9 5.9 7.4
 0 7 -9 219.38 51.39
 0 -7 9 220.48 23.5
 0 -7 9 206.68 23.2
 0 -7 9 218.78 34.6
 -1 7 -9 -0.9 15.1
 1 -7 9 1.5 3.5
 1 -7 9 3.4 3.3
 1 -7 9 0.9 8.5
 -2 7 -9 30 21.4
 2 -7 9 17.3 11.3
 2 -7 9 32.3 6.2
 2 -7 9 32.1 6.1
 -3 7 -9 71.49 31.2
 3 -7 9 153.28 28.1
 3 -7 9 137.19 14.7
 3 -7 9 138.29 16.2
 -4 7 -9 251.87 37.5
 -4 7 -9 230.88 53.69
 4 -7 9 324.07 45.9
 4 -7 9 304.27 30.6
 4 -7 9 293.07 29
 -5 7 -9 400.76 61.39
 -5 7 -9 497.05 82.19
 5 -7 9 671.03 72.29
 5 -7 9 551.14 50.59
 5 -7 9 479.25 51.89
 -6 7 -9 22.4 28.5
 -6 7 -9 34.7 31.2
 6 -7 9 36.8 9.1
 6 -7 9 46.7 9.8
 6 -7 9 37.3 7.2
 6 6 -9 293.27 32.7
 -6 -6 9 299.67 31.7
 -6 -6 9 367.96 34
 -6 -6 9 218.48 52.09
 -6 -6 9 292.07 30.4
 5 6 -9 83.59 14.1
 -5 -6 9 95.79 12.4
 -5 -6 9 88.19 19.7
 -5 -6 9 60.09 24.8
 -5 -6 9 99.59 11.5
 4 6 -9 740.43 76.59
 -4 -6 9 853.11 75.89
 -4 -6 9 690.83 78.39
 -4 -6 9 802.32 74.99
 3 6 -9 955.7 88.99
 -3 -6 9 833.82 87.89
 -3 -6 9 839.22 87.39
 -3 -6 9 861.81 90.29
 -3 -6 9 948.01 90.19
 -3 -6 9 959.5 87.19
 2 6 -9 380.26 38.2
 -2 -6 9 351.76 36.2
 -2 -6 9 360.86 36.7
 -2 -6 9 347.37 40.8
 -1 -6 9 1297.57 124.99
 -1 -6 9 1132.99 118.59
 -1 -6 9 1232.28 118.29
 0 6 -9 164.98 36.7
 0 -6 9 169.58 18.1
 0 -6 9 167.08 25.4
 0 -6 9 152.88 17.8
 -1 6 -9 9.2 13.8
 1 -6 9 9.6 3.5
 1 -6 9 7.3 8.1
 1 -6 9 13.2 4.1
 -2 6 -9 29.6 19.9
 2 -6 9 10.7 10
 2 -6 9 19 4.9
 2 -6 9 17 4
 -3 6 -9 467.25 52.29
 -3 6 -9 358.46 64.09
 3 -6 9 532.15 59.69
 3 -6 9 443.26 44.7
 3 -6 9 465.15 46.1
 -4 6 -9 89.49 32.5
 -4 6 -9 73.79 21.2
 4 -6 9 109.79 12.9
 4 -6 9 133.09 27.3
 4 -6 9 76.29 11.7
 4 -6 9 95.19 10.8
 -5 6 -9 626.94 96.49
 5 -6 9 806.12 71.09
 5 -6 9 826.92 72.79
 5 -6 9 614.04 71.89
 -6 6 -9 349.77 78.19
 -6 6 -9 317.67 78.39
 6 -6 9 348.57 40.2
 6 -6 9 418.26 40.5
 6 -6 9 478.35 65.19
 -7 6 -9 89.29 43.6
 -7 6 -9 79.99 34.8
 7 -6 9 129.29 22.2
 7 -6 9 135.49 16.5
 7 5 -9 96.19 14.4
 -7 -5 9 94.39 13.7
 -7 -5 9 44.6 34
 -7 -5 9 87.99 16.1
 -7 -5 9 105.99 11.5
 6 5 -9 57.79 10.2
 -6 -5 9 52.89 10.4
 -6 -5 9 23.6 24.1
 -6 -5 9 44.8 7.2
 -6 -5 9 47.3 8.5
 5 5 -9 873.11 82.49
 -5 -5 9 957.8 82.69
 -5 -5 9 813.62 80.79
 -5 -5 9 840.82 81.69
 -5 -5 9 670.73 96.09
 4 5 -9 184.78 19.9
 -4 -5 9 179.28 24.6
 -4 -5 9 163.08 18.8
 -4 -5 9 160.58 18.1
 3 5 -9 1532.85 152.88
 -3 -5 9 1511.45 152.08
 -3 -5 9 1481.25 154.48
 -3 -5 9 1546.85 155.38
 -3 -5 9 1829.12 151.88
 2 5 -9 381.46 39.2
 -2 -5 9 434.76 38.5
 -2 -5 9 387.16 42.9
 -2 -5 9 331.97 39.6
 -2 -5 9 387.36 37.9
 -1 -5 9 1169.28 117.19
 -1 -5 9 1117.39 110.49
 0 5 -9 511.05 69.99
 0 -5 9 596.44 61.69
 0 -5 9 502.45 52.99
 -1 5 -9 119.79 29.9
 1 -5 9 142.09 15.8
 1 -5 9 149.39 15
 1 -5 9 138.19 24
 -2 5 -9 51.39 22.6
 -2 5 -9 66.49 13.3
 2 -5 9 62.99 7.5
 2 -5 9 75.29 18.3
 -3 5 -9 18.6 15.7
 -3 5 -9 25.3 12.3
 3 -5 9 30.6 4.7
 3 -5 9 39 6.6
 3 -5 9 45.9 16.8
 -4 5 -9 505.95 70.09
 -4 5 -9 568.34 80.69
 4 -5 9 583.84 60.69
 4 -5 9 726.73 61.49
 4 -5 9 666.23 59.59
 -5 5 -9 14.6 19
 -5 5 -9 7.9 14.6
 5 -5 9 12.2 13
 5 -5 9 20.5 4.7
 5 -5 9 7.7 3.2
 5 -5 9 11.5 5.2
 -6 5 -9 843.72 109.19
 -6 5 -9 869.91 79.99
 6 -5 9 760.62 81.19
 -7 5 -9 54.89 29
 -7 5 -9 49.1 30
 -7 5 -9 80.29 10.3
 7 -5 9 153.58 55.09
 7 -5 9 89.99 12.5
 7 -5 9 39.4 10.1
 -8 5 -9 147.69 57.49
 -8 5 -9 163.38 57.19
 8 -5 9 179.28 23.1
 8 -5 9 220.38 23.7
 8 4 -9 0.9 6.7
 -8 -4 9 6.2 5.5
 -8 -4 9 21 37.5
 7 4 -9 45.3 8
 -7 -4 9 40.1 11.7
 -7 -4 9 31.5 5.8
 -7 -4 9 29.8 7.5
 6 4 -9 573.14 51.29
 -6 -4 9 490.95 51.19
 -6 -4 9 452.05 49.7
 -6 -4 9 562.34 52.39
 5 4 -9 274.37 27.1
 -5 -4 9 237.18 25.8
 -5 -4 9 259.47 26.9
 -5 -4 9 261.37 27.3
 4 4 -9 1516.45 146.29
 -4 -4 9 1588.34 146.39
 -4 -4 9 1415.46 146.59
 -4 -4 9 1557.74 145.39
 3 4 -9 225.38 24.5
 -3 -4 9 236.08 23.6
 -3 -4 9 185.58 23.7
 -3 -4 9 253.97 27.8
 -3 -4 9 253.27 29.3
 -2 -4 9 1360.96 146.59
 -2 -4 9 1717.73 147.29
 -2 -4 9 1385.56 150.98
 -2 -4 9 1671.83 153.08
 1 4 -9 5.5 10.4
 -1 -4 9 5.5 5
 -1 -4 9 3.2 4.2
 -1 -4 9 3.3 1.9
 0 4 -9 1119.49 117.49
 0 -4 9 939.51 98.99
 0 -4 9 1053.59 107.79
 -1 4 -9 205.78 38.6
 -1 4 -9 226.58 28.3
 1 -4 9 302.67 35.3
 1 -4 9 286.17 25.7
 1 -4 9 224.48 24.4
 1 -4 9 265.37 35.1
 -2 4 -9 7.5 6.9
 -2 4 -9 10.6 11.3
 2 -4 9 0.4 6.8
 2 -4 9 1.4 1.4
 2 -4 9 4.4 2.6
 -3 4 -9 8.7 10.9
 -3 4 -9 7.5 7.8
 3 -4 9 11.2 3.3
 3 -4 9 14.4 10.8
 -4 4 -9 82.69 27.1
 -4 4 -9 68.69 21.7
 4 -4 9 114.89 12.3
 4 -4 9 133.99 32.9
 4 -4 9 93.49 11.3
 4 -4 9 96.79 10.1
 -5 4 -9 1167.88 137.59
 -5 4 -9 1375.26 120.59
 -5 4 -9 1109.29 141.09
 5 -4 9 1293.77 121.79
 -6 4 -9 2.1 3.1
 -6 4 -9 -1.8 12.7
 6 -4 9 3.2 3.6
 6 -4 9 5.1 4.1
 6 -4 9 2.4 12.3
 -7 4 -9 738.83 107.09
 -7 4 -9 667.93 104.79
 -7 4 -9 929.31 81.99
 7 -4 9 776.92 82.89
 7 -4 9 1007.1 83.89
 -8 4 -9 35.1 32.3
 -8 4 -9 14 6.5
 -8 4 -9 7 25.5
 8 -4 9 12.3 6.7
 8 -4 9 14.6 5.9
 8 3 -9 17.7 10.8
 -8 -3 9 10.9 6.5
 -8 -3 9 6.9 5.8
 7 3 -9 65.79 9.6
 7 3 -9 61.79 12.6
 -7 -3 9 97.19 12.4
 -7 -3 9 57.59 10
 6 3 -9 155.08 16
 6 3 -9 144.29 18.6
 -6 -3 9 149.88 17.3
 -6 -3 9 151.18 16.6
 -6 -3 9 126.59 14.6
 5 3 -9 401.86 37.8
 5 3 -9 282.87 40.3
 -5 -3 9 392.96 36.8
 -5 -3 9 383.16 38.5
 4 3 -9 1677.83 163.58
 -4 -3 9 1635.34 166.18
 -4 -3 9 1743.13 163.68
 -4 -3 9 1752.92 162.88
 -4 -3 9 1702.03 163.88
 3 3 -9 1539.15 137.29
 -3 -3 9 1439.76 136.49
 -3 -3 9 1458.35 137.09
 -3 -3 9 1269.17 136.69
 -2 -3 9 1112.49 110.99
 -2 -3 9 1147.19 115.89
 -2 -3 9 1121.69 117.49
 -2 -3 9 1242.78 111.49
 -1 -3 9 967.6 93.79
 -1 -3 9 962.1 101.59
 -1 -3 9 997.9 93.79
 -1 -3 9 962 97.89
 0 3 -9 58.79 19.2
 0 -3 9 54.19 11.2
 0 -3 9 46.4 6.5
 0 -3 9 55.19 14
 -1 3 -9 293.47 35.8
 -1 3 -9 306.27 45
 1 -3 9 353.76 42.4
 1 -3 9 307.37 30.2
 1 -3 9 314.67 31.4
 -2 3 -9 181.98 26.9
 -2 3 -9 153.58 31.5
 2 -3 9 246.18 33.2
 2 -3 9 202.88 20.5
 -3 3 -9 30.4 12
 -3 3 -9 47.8 18.6
 3 -3 9 73.19 17.8
 3 -3 9 41.5 5.8
 -4 3 -9 202.08 34.8
 -4 3 -9 220.28 38.4
 4 -3 9 230.08 22.9
 -5 3 -9 45.2 7.3
 -5 3 -9 23.7 16.3
 5 -3 9 78.09 31.7
 5 -3 9 28.8 5.7
 -6 3 -9 844.12 106.79
 -6 3 -9 734.73 112.59
 -6 3 -9 1018.8 85.89
 6 -3 9 847.22 86.49
 -7 3 -9 124.89 41.4
 -7 3 -9 87.59 33.8
 -7 3 -9 186.18 17.4
 7 -3 9 142.89 17.4
 -8 3 -9 668.83 97.59
 -8 3 -9 696.73 104.39
 8 -3 9 803.62 74.19
 -9 3 -9 19.2 39.2
 -9 3 -9 19.3 9.3
 9 -3 9 25.3 9.2
 9 -3 9 15.8 38.7
 8 2 -9 28.2 9.6
 -8 -2 9 18.8 7.2
 -8 -2 9 33.1 7.2
 7 2 -9 44.5 10.9
 -7 -2 9 41.2 7.8
 -7 -2 9 51.09 9.6
 6 2 -9 16.7 6.8
 -6 -2 9 19.4 5.4
 -6 -2 9 22.1 3.3
 -6 -2 9 25 6.2
 -6 -2 9 19.2 6.8
 -6 -2 9 25.3 5.3
 5 2 -9 1091.49 109.69
 -5 -2 9 1042 109.09
 -5 -2 9 1087.89 109.49
 -5 -2 9 1230.28 107.09
 -5 -2 9 1129.69 108.39
 4 2 -9 226.48 22.3
 -4 -2 9 204.58 20.8
 -4 -2 9 200.88 21.2
 -4 -2 9 217.38 19.9
 -4 -2 9 156.48 24.1
 -3 -2 9 2496.55 276.67
 -3 -2 9 3113.59 268.97
 -3 -2 9 2717.83 269.07
 -3 -2 9 2909.31 268.27
 -2 -2 9 2222.78 213.98
 -2 -2 9 2008.5 213.48
 -2 -2 9 2550.94 213.98
 -2 -2 9 2309.07 219.48
 -2 -2 9 2097.39 220.08
 -1 -2 9 1211.58 114.59
 -1 -2 9 941.01 105.39
 -1 -2 9 1078.49 105.49
 -1 -2 9 1153.38 110.99
 -1 -2 9 1144.89 105.59
 0 -2 9 1503.55 148.59
 0 -2 9 1597.24 153.38
 0 -2 9 1394.46 142.99
 -1 2 -9 223.08 29.6
 -1 2 -9 233.38 37.2
 1 -2 9 250.57 35
 1 -2 9 268.47 36.9
 -2 2 -9 96.29 22.2
 -2 2 -9 82.79 17.4
 2 -2 9 131.29 23.5
 -3 2 -9 49.8 17.5
 -3 2 -9 50.29 16
 3 -2 9 108.79 22.3
 3 -2 9 57.19 7.3
 3 -2 9 120.59 30.8
 -4 2 -9 434.56 36.6
 -4 2 -9 310.77 49.5
 4 -2 9 343.07 37.3
 -5 2 -9 94.69 25.1
 -5 2 -9 92.49 27.3
 5 -2 9 108.49 12
 -6 2 -9 465.65 71.69
 6 -2 9 513.05 49.8
 -7 2 -9 692.03 90.29
 -7 2 -9 664.43 95.69
 7 -2 9 750.32 70.89
 -8 2 -9 256.67 48.3
 -8 2 -9 225.58 57.49
 8 -2 9 245.48 27.5
 -9 2 -9 323.67 79.49
 -9 2 -9 314.57 65.39
 -9 2 -9 495.25 43.2
 9 -2 9 396.16 43.1
 9 1 -9 154.08 25.1
 -9 -1 9 216.28 22.6
 8 1 -9 1 6.7
 -8 -1 9 2.5 4.3
 -8 -1 9 -0.9 8
 7 1 -9 85.29 13.3
 -7 -1 9 74.49 10.3
 -7 -1 9 78.69 14
 -7 -1 9 67.89 11.4
 6 1 -9 207.58 25.5
 -6 -1 9 186.28 24.2
 -6 -1 9 206.18 22.6
 -6 -1 9 240.48 22.9
 5 1 -9 79.89 11.2
 -5 -1 9 84.89 10.6
 -5 -1 9 71.89 12
 -5 -1 9 88.59 10
 -5 -1 9 83.79 8.2
 4 1 -9 2095.79 215.28
 -4 -1 9 2310.07 213.48
 -4 -1 9 2240.38 215.08
 -4 -1 9 2307.17 214.68
 3 1 -9 13.6 3.5
 -3 -1 9 14.9 2.9
 -3 -1 9 11.6 2
 -3 -1 9 5 2.2
 -2 -1 9 3130.39 315.47
 -2 -1 9 3230.68 309.77
 -2 -1 9 3516.85 309.17
 -2 -1 9 3100.49 309.37
 -1 -1 9 1632.04 157.08
 -1 -1 9 1688.83 163.28
 -1 -1 9 1523.25 157.18
 -1 -1 9 1754.32 165.48
 0 1 -9 2052.99 215.38
 0 -1 9 2288.77 209.48
 0 -1 9 2245.08 216.18
 -1 1 -9 109.69 22.9
 -1 1 -9 96.99 17.2
 1 -1 9 126.39 21.5
 1 -1 9 109.99 18.5
 -2 1 -9 314.47 40.5
 2 -1 9 321.27 31.2
 -3 1 -9 323.67 43
 -3 1 -9 301.47 43.8
 3 -1 9 321.67 31.4
 -4 1 -9 30.6 15.2
 -4 1 -9 31.6 13.9
 -4 1 -9 35.5 4.8
 4 -1 9 24.7 4.8
 4 -1 9 72.89 21.5
 4 -1 9 91.59 32.8
 -5 1 -9 1057.59 126.69
 -5 1 -9 1062.59 123.69
 5 -1 9 1226.48 109.19
 -6 1 -9 2.7 15.9
 -6 1 -9 15.6 4.6
 -6 1 -9 2.8 3.2
 -6 1 -9 -4.2 8.7
 6 -1 9 3.9 11.4
 6 -1 9 0.2 2.8
 7 -1 9 1349.86 131.49
 -8 1 -9 329.87 55.79
 -8 1 -9 353.66 67.79
 8 -1 9 407.96 39.7
 -9 1 -9 363.66 33.9
 -9 1 -9 190.08 49.7
 -9 1 -9 350.86 33.9
 -9 1 -9 241.38 69.49
 9 -1 9 293.17 35.8
 9 -1 9 294.37 31.3
 9 0 -9 -6.8 7.6
 -9 0 9 4.4 12.8
 -9 0 9 10.5 5.8
 8 0 -9 63.79 12.7
 -8 0 9 85.39 10.8
 -8 0 9 60.09 12
 -8 0 9 64.49 17.6
 7 0 -9 5 4.3
 -7 0 9 1.1 4.4
 -7 0 9 4.6 6.7
 -7 0 9 1.5 3.3
 6 0 -9 209.68 24.6
 -6 0 9 237.78 23.7
 -6 0 9 217.08 27.9
 -6 0 9 239.18 24.7
 5 0 -9 120.99 14.5
 -5 0 9 133.79 14.6
 -5 0 9 125.99 13.6
 -5 0 9 115.89 17.1
 4 0 -9 679.03 74.29
 -4 0 9 770.02 73.79
 -4 0 9 842.32 74.69
 3 0 -9 1780.72 153.18
 3 0 -9 1470.55 153.68
 -3 0 9 1533.35 151.68
 -3 0 9 1483.65 153.08
 -3 0 9 1696.93 152.58
 2 0 -9 375.46 32.7
 2 0 -9 286.47 33.2
 -2 0 9 321.37 32.8
 -2 0 9 319.77 32.2
 -2 0 9 346.37 32
 -2 0 9 318.47 38.7
 1 0 -9 5577.74 538.95
 -1 0 9 6058.89 538.05
 -1 0 9 5678.43 544.95
 -1 0 9 5307.47 538.65
 0 0 -9 22 8
 0 0 -9 15.3 2.8
 0 0 9 16.9 2.6
 0 0 9 14 6.3
 -1 0 -9 1519.25 140.09
 -1 0 -9 1481.35 148.59
 1 0 9 1340.57 139.89
 1 0 9 1452.55 139.99
 1 0 9 1568.24 149.09
 -2 0 -9 24.3 3.1
 -2 0 -9 23.1 9.6
 2 0 9 35.1 12.8
 2 0 9 28.6 13.8
 2 0 9 24.2 3.3
 -3 0 -9 89.29 9.4
 -3 0 -9 81.99 19.1
 -3 0 -9 84.79 19.9
 3 0 9 128.09 24.2
 3 0 9 77.09 9.4
 -4 0 -9 386.46 33.2
 -4 0 -9 279.67 43.7
 -4 0 -9 303.77 46.3
 4 0 9 322.67 33.1
 -5 0 -9 494.35 73.99
 -5 0 -9 727.03 63.59
 -5 0 -9 710.83 63.99
 5 0 9 635.94 63.99
 -6 0 -9 1048.4 121.49
 -6 0 -9 1051.49 132.59
 6 0 9 1203.38 108.49
 -7 0 -9 34.3 20.2
 -7 0 -9 63.29 9.5
 -7 0 -9 46.9 20.7
 -7 0 -9 60.89 9.5
 7 0 9 114.99 28.1
 7 0 9 56.99 9.9
 -8 0 -9 1024.6 92.39
 -8 0 -9 952.3 92.29
 8 0 9 874.81 91.19
 8 0 9 894.01 92.89
 -9 0 -9 1.8 18.3
 -9 0 -9 4.8 7.1
 -9 0 -9 2.1 30.5
 9 0 9 3.4 14.8
 9 0 9 9.3 5.1
 9 0 9 -3.7 6.8
 9 -1 -9 266.27 32.7
 -9 1 9 288.07 30.5
 -9 1 9 263.87 45.5
 -9 1 9 342.87 41.2
 8 -1 -9 23.1 7.9
 -8 1 9 24.3 5.7
 -8 1 9 10 6.3
 -8 1 9 18.3 11.7
 7 -1 -9 4.5 4.3
 -7 1 9 2.3 4.2
 -7 1 9 0.4 7
 -7 1 9 1.1 2.8
 6 -1 -9 13.4 4.2
 -6 1 9 9.9 6.6
 -6 1 9 17.7 5.1
 -6 1 9 19.1 4.2
 5 -1 -9 424.86 46.9
 5 -1 -9 487.65 46
 -5 1 9 488.25 45.4
 -5 1 9 450.35 46.2
 -5 1 9 431.66 50.39
 4 -1 -9 296.57 31
 4 -1 -9 311.07 32.3
 -4 1 9 306.77 31.5
 -4 1 9 312.37 30.6
 3 -1 -9 1734.23 165.38
 -3 1 9 1717.83 164.98
 2 -1 -9 1783.32 193.58
 2 -1 -9 2061.79 194.78
 -2 1 9 2015.5 193.08
 -2 1 9 2024.8 193.38
 -2 1 9 2080.49 201.48
 -2 1 9 2236.28 194.48
 1 -1 -9 1364.06 125.69
 1 -1 -9 1337.37 124.49
 -1 1 9 1276.37 125.29
 -1 1 9 1274.17 124.39
 -1 1 9 1281.17 131.89
 0 -1 -9 3588.84 308.87
 0 1 9 2884.11 306.67
 0 1 9 2992.1 299.97
 -1 -1 -9 59.19 13.3
 -1 -1 -9 54.09 6
 1 1 9 59.29 13.1
 1 1 9 51.99 5.9
 1 1 9 47.5 5.3
 -2 -1 -9 1215.98 116.69
 -2 -1 -9 1263.67 116.39
 -2 -1 -9 1109.29 126.79
 2 1 9 1444.96 130.89
 2 1 9 1096.79 116.39
 -3 -1 -9 89.59 20.6
 -3 -1 -9 85.99 9.5
 3 1 9 70.89 9.7
 3 1 9 128.19 22.9
 3 1 9 145.69 29.5
 -4 -1 -9 251.97 23.3
 -4 -1 -9 191.48 35
 4 1 9 222.88 23.6
 -5 -1 -9 151.48 13.9
 -5 -1 -9 84.09 25.8
 5 1 9 107.69 13.7
 -6 -1 -9 1237.78 108.29
 6 1 9 1026.1 107.59
 6 1 9 1077.49 108.69
 -7 -1 -9 938.11 83.29
 -7 -1 -9 856.81 83.19
 7 1 9 873.81 82.79
 7 1 9 710.73 83.49
 -8 -1 -9 384.46 41.6
 -8 -1 -9 432.56 42.1
 8 1 9 359.96 42.6
 8 1 9 427.56 41.2
 -9 -1 -9 746.33 70.09
 -9 -1 -9 783.22 73.19
 9 1 9 670.13 68.69
 9 1 9 596.14 70.59
 9 -2 -9 224.98 28.8
 -9 2 9 260.67 27
 -9 2 9 226.38 40.7
 8 -2 -9 84.39 15.1
 -8 2 9 97.39 23.7
 -8 2 9 137.49 14.5
 7 -2 -9 163.88 20.5
 -7 2 9 193.08 19.9
 -7 2 9 181.78 29.2
 -7 2 9 170.28 20.7
 6 -2 -9 16 6.6
 6 -2 -9 17.5 5.1
 -6 2 9 24.4 5.1
 -6 2 9 19 9.6
 -6 2 9 31.6 6.2
 5 -2 -9 9 3.9
 5 -2 -9 18.8 6
 -5 2 9 22 4.2
 -5 2 9 10.9 4.4
 -5 2 9 16.3 8.4
 4 -2 -9 1633.54 165.18
 -4 2 9 1911.81 164.98
 -4 2 9 1601.84 169.88
 -4 2 9 1695.83 163.58
 3 -2 -9 109.09 13.4
 3 -2 -9 108.39 12.1
 -3 2 9 122.99 13.2
 -3 2 9 116.89 12
 2 -2 -9 4283.57 389.06
 2 -2 -9 3714.13 387.56
 -2 2 9 4630.84 387.36
 -2 2 9 4002.2 388.56
 -2 2 9 3717.83 395.26
 1 -2 -9 455.25 44.1
 1 -2 -9 424.56 42.7
 -1 2 9 465.35 50.99
 -1 2 9 440.56 43
 -1 2 9 457.05 43.8
 0 -2 -9 1950.7 189.18
 0 -2 -9 1937.41 181.08
 0 2 9 1881.51 188.48
 0 2 9 1940.61 180.88
 0 2 9 1752.32 180.38
 -1 -2 -9 1233.28 115.89
 -1 -2 -9 1062.99 105.69
 -1 -2 -9 1098.89 104.89
 1 2 9 1079.59 114.09
 1 2 9 1114.69 105.59
 1 2 9 1022.9 105.39
 -2 -2 -9 35.9 5
 -2 -2 -9 29.9 4.1
 -2 -2 -9 32.2 13.9
 2 2 9 38.3 14.2
 2 2 9 35.6 4.2
 2 2 9 29.1 4.5
 -3 -2 -9 166.08 28.1
 -3 -2 -9 140.39 15.1
 3 2 9 224.98 35.8
 3 2 9 147.89 15.5
 3 2 9 125.79 15.1
 -4 -2 -9 29.2 14.1
 -4 -2 -9 27.3 4.7
 4 2 9 28.7 5.3
 4 2 9 57.69 18.2
 4 2 9 81.59 30
 4 2 9 28.4 5.1
 -5 -2 -9 454.85 68.99
 5 2 9 521.85 54.49
 5 2 9 648.04 54.49
 -6 -2 -9 155.18 14.3
 -6 -2 -9 70.29 28.9
 6 2 9 89.69 14
 6 2 9 127.79 13.8
 -7 -2 -9 1102.09 100.99
 7 2 9 902.11 101.39
 7 2 9 1079.69 100.49
 -8 -2 -9 587.44 56.69
 -8 -2 -9 600.64 56.79
 8 2 9 549.74 55.99
 8 2 9 493.35 57.59
 -9 -2 -9 569.44 56.49
 -9 -2 -9 568.94 61.49
 9 2 9 515.45 54.89
 9 2 9 540.85 61.49
 8 -3 -9 304.17 33.4
 -8 3 9 340.27 34.9
 -8 3 9 270.07 44.2
 7 -3 -9 12.3 5.6
 7 -3 -9 12 7.2
 -7 3 9 8.4 5.9
 -7 3 9 6.2 10.2
 6 -3 -9 72.59 12.2
 6 -3 -9 57.89 8.9
 -6 3 9 47.6 17.6
 -6 3 9 57.39 9.9
 5 -3 -9 394.66 39.6
 5 -3 -9 352.06 37.6
 -5 3 9 337.67 45.3
 -5 3 9 436.06 39.3
 4 -3 -9 338.07 35.3
 4 -3 -9 328.47 36.7
 -4 3 9 406.16 36.8
 -4 3 9 351.56 43
 3 -3 -9 3544.55 336.57
 3 -3 -9 3562.04 337.37
 3 -3 -9 3461.05 338.87
 -3 3 9 3558.04 336.77
 -3 3 9 3400.86 346.77
 -3 3 9 3383.76 344.67
 -3 3 9 3859.81 338.67
 2 -3 -9 220.08 24.2
 2 -3 -9 228.08 22.7
 2 -3 -9 242.78 22.5
 -2 3 9 237.08 23.9
 -2 3 9 224.78 22.7
 -2 3 9 215.98 30.6
 1 -3 -9 4397.26 392.26
 1 -3 -9 4347.27 393.66
 1 -3 -9 4271.87 392.26
 -1 3 9 4012.7 392.36
 -1 3 9 3891.41 393.16
 -1 3 9 3789.72 400.36
 0 -3 -9 282.17 26.9
 0 -3 -9 249.58 27.6
 0 -3 -9 290.47 35.8
 0 3 9 262.57 34.8
 0 3 9 285.27 27.7
 0 3 9 266.97 27
 -1 -3 -9 552.74 60.39
 -1 -3 -9 522.55 49.99
 -1 -3 -9 463.05 50.49
 -1 -3 -9 548.55 49.8
 1 3 9 481.05 50.09
 1 3 9 519.05 59.29
 -2 -3 -9 598.34 69.79
 -2 -3 -9 554.14 58.19
 -2 -3 -9 611.84 57.59
 2 3 9 682.23 71.39
 2 3 9 545.45 57.79
 -3 -3 -9 4.2 2.3
 -3 -3 -9 2.7 7.8
 3 3 9 5.2 2.2
 3 3 9 1.8 9.8
 3 3 9 4.5 2.3
 -4 -3 -9 17.7 4.3
 -4 -3 -9 14.9 13.3
 4 3 9 31.9 4.8
 4 3 9 34.9 15.5
 4 3 9 18.3 18.7
 4 3 9 21.7 4.8
 -5 -3 -9 34.9 6.2
 -5 -3 -9 22.3 15.8
 5 3 9 75.49 34.6
 5 3 9 29.1 5.9
 5 3 9 68.69 22.2
 5 3 9 41.7 6.9
 6 3 9 307.17 35.2
 6 3 9 321.87 33.5
 -7 -3 -9 3.3 16.4
 -7 -3 -9 34.7 6.7
 7 3 9 26.7 7.2
 7 3 9 62.19 20.7
 7 3 9 16.1 5.4
 -8 -3 -9 1392.86 115.19
 8 3 9 1156.98 114.09
 8 3 9 956.9 115.39
 -9 -3 -9 83.29 42.9
 -9 -3 -9 202.78 22.1
 -9 -3 -9 188.48 21.4
 9 3 9 120.19 22.9
 9 3 9 162.78 20.6
 9 3 9 205.68 29.7
 8 -4 -9 2.4 8.5
 8 -4 -9 11.7 7.5
 -8 4 9 4.8 15.9
 -8 4 9 8.8 7.8
 7 -4 -9 93.79 13.2
 7 -4 -9 89.19 15.9
 -7 4 9 104.39 14.7
 -7 4 9 68.49 23.9
 6 -4 -9 26.6 7.8
 6 -4 -9 29.3 6.2
 -6 4 9 23.7 13.2
 -6 4 9 22.7 7.5
 5 -4 -9 388.16 35.2
 5 -4 -9 325.67 36.9
 5 -4 -9 393.76 39.2
 -5 4 9 357.86 47.1
 -5 4 9 354.66 38.2
 4 -4 -9 347.67 32.3
 4 -4 -9 325.87 33.4
 4 -4 -9 334.47 35.2
 -4 4 9 309.77 42
 -4 4 9 335.47 34.8
 3 -4 -9 989 96.79
 3 -4 -9 983.1 95.19
 3 -4 -9 989.6 94.49
 -3 4 9 1042.3 96.39
 -3 4 9 1012.4 105.89
 -3 4 9 903.11 103.29
 -3 4 9 986 94.69
 2 -4 -9 2672.33 253.07
 2 -4 -9 2502.85 251.47
 2 -4 -9 2732.63 251.27
 -2 4 9 2433.76 260.57
 -2 4 9 2710.33 252.67
 -2 4 9 2756.42 251.57
 1 -4 -9 559.14 54.09
 1 -4 -9 563.84 55.39
 -1 4 9 559.24 54.29
 -1 4 9 535.55 55.09
 -1 4 9 573.14 63.49
 0 -4 -9 2514.35 252.47
 0 -4 -9 2660.63 251.57
 0 -4 -9 2552.74 260.77
 0 4 9 2537.85 251.77
 0 4 9 2658.53 261.27
 0 4 9 2897.21 252.77
 -1 -4 -9 27.4 3.8
 -1 -4 -9 15.9 9.4
 -1 -4 -9 19.7 3.6
 -1 -4 -9 16.1 4.1
 1 4 9 15.8 3.7
 1 4 9 18.4 9.5
 -2 -4 -9 1551.94 162.18
 -2 -4 -9 1594.04 149.59
 -2 -4 -9 1523.85 150.48
 -2 -4 -9 1563.34 149.59
 2 4 9 1385.76 149.69
 2 4 9 1767.02 164.88
 -3 -4 -9 103.69 14
 -3 -4 -9 133.49 13.5
 -3 -4 -9 125.99 13.3
 -3 -4 -9 96.39 24.1
 3 4 9 108.49 13.4
 3 4 9 184.78 34.8
 -4 -4 -9 16.8 4.4
 -4 -4 -9 21.5 15.8
 4 4 9 43.5 16.2
 4 4 9 39.7 24.5
 4 4 9 33.8 6
 4 4 9 18.6 4.5
 -5 -4 -9 41.2 7
 -5 -4 -9 26.4 17.1
 5 4 9 83.29 21.9
 5 4 9 35.9 6.9
 5 4 9 74.19 38
 5 4 9 27.2 6.4
 -6 -4 -9 97.79 31
 -6 -4 -9 198.08 17.9
 6 4 9 114.79 17.4
 6 4 9 173.48 17.6
 -7 -4 -9 951.3 81.79
 7 4 9 719.83 82.09
 7 4 9 793.32 80.99
 -8 -4 -9 19 23.4
 -8 -4 -9 38.8 9.2
 8 4 9 47.9 9.1
 8 4 9 32.6 10.2
 8 4 9 81.49 20.2
 -9 -4 -9 765.32 71.99
 9 4 9 604.94 73.49
 9 4 9 738.13 71.29
 8 -5 -9 144.99 23
 8 -5 -9 114.69 18.4
 -8 5 9 95.29 38.1
 -8 5 9 154.98 21.3
 7 -5 -9 9.1 8.3
 7 -5 -9 9.9 6.3
 -7 5 9 4.4 14.9
 -7 5 9 1.3 7.2
 6 -5 -9 22.3 6.2
 6 -5 -9 30.7 3.9
 6 -5 -9 23.2 7.4
 -6 5 9 26.8 15.1
 -6 5 9 21 7.8
 5 -5 -9 29.1 6
 5 -5 -9 23.8 3.8
 5 -5 -9 17.1 6.5
 -5 5 9 23.7 6.5
 -5 5 9 18.8 12.7
 4 -5 -9 333.07 34.6
 4 -5 -9 284.67 32.7
 4 -5 -9 322.27 31.6
 -4 5 9 350.66 44.6
 -4 5 9 310.87 32
 -4 5 9 334.37 34.1
 -4 5 9 355.06 45.5
 3 -5 -9 14.4 3.8
 3 -5 -9 10 4.4
 3 -5 -9 17.9 3.2
 -3 5 9 7.6 9.2
 -3 5 9 13.2 4.7
 -3 5 9 10.6 8
 -3 5 9 17.6 3.6
 2 -5 -9 1944.21 195.18
 2 -5 -9 2101.89 193.58
 -2 5 9 1960.4 193.88
 -2 5 9 1886.61 202.88
 -2 5 9 2091.89 204.78
 -2 5 9 2160.48 195.18
 1 -5 -9 1618.64 156.48
 1 -5 -9 1562.14 157.78
 -1 5 9 1563.94 164.98
 -1 5 9 1592.94 156.78
 -1 5 9 1790.92 158.08
 -1 5 9 1681.03 167.08
 0 -5 -9 1291.47 137.59
 0 -5 -9 1223.38 129.19
 0 -5 -9 1372.66 128.29
 0 5 9 1274.37 128.49
 0 5 9 1385.06 138.89
 0 5 9 1468.75 129.59
 -1 -5 -9 2413.86 247.88
 -1 -5 -9 2687.43 246.98
 -1 -5 -9 2519.25 257.17
 -1 -5 -9 2715.23 247.08
 1 5 9 2747.03 259.27
 1 5 9 2409.46 247.18
 -2 -5 -9 196.58 23.4
 -2 -5 -9 228.68 22.5
 -2 -5 -9 210.08 33.3
 -2 -5 -9 237.98 22.6
 2 5 9 169.58 22.3
 2 5 9 277.87 38.5
 -3 -5 -9 128.19 14.1
 -3 -5 -9 117.79 15.2
 -3 -5 -9 122.99 13.9
 -3 -5 -9 123.49 26.6
 3 5 9 104.59 14
 3 5 9 203.68 38.3
 -4 -5 -9 69.39 25.3
 -4 -5 -9 93.09 11.8
 4 5 9 179.88 44.6
 -5 -5 -9 125.99 13.1
 -5 -5 -9 60.29 24.6
 5 5 9 93.89 12.4
 5 5 9 176.58 51.89
 5 5 9 83.59 12.2
 -6 -5 -9 77.29 29.3
 -6 -5 -9 136.39 14.8
 6 5 9 107.19 14.4
 6 5 9 112.09 15.3
 -7 -5 -9 645.24 59.29
 7 5 9 551.64 58.69
 7 5 9 548.15 60.09
 -8 -5 -9 118.09 42.4
 7 -6 -9 50.29 10.6
 7 -6 -9 47.2 11.9
 -7 6 9 38.4 11
 -7 6 9 52.99 27.1
 6 -6 -9 25.3 9.1
 6 -6 -9 24.6 4.1
 6 -6 -9 20.8 6.8
 -6 6 9 22.6 16.4
 -6 6 9 27.1 16.7
 -6 6 9 13.3 7.8
 5 -6 -9 11.5 5
 5 -6 -9 20.9 7.9
 5 -6 -9 10.4 3.1
 -5 6 9 20.4 15.8
 -5 6 9 8.1 11.2
 -5 6 9 19.7 7.2
 4 -6 -9 117.29 16
 4 -6 -9 127.69 12.8
 4 -6 -9 113.59 13.9
 -4 6 9 100.59 13.2
 -4 6 9 107.59 24.8
 -4 6 9 120.79 26.6
 -4 6 9 129.79 15.7
 3 -6 -9 382.56 36.3
 3 -6 -9 339.17 36.8
 3 -6 -9 349.57 38.4
 -3 6 9 359.96 36.7
 -3 6 9 405.26 38.6
 -3 6 9 352.16 48.1
 -3 6 9 378.26 49
 2 -6 -9 24 4.7
 2 -6 -9 27.9 6.9
 -2 6 9 35.8 14.7
 -2 6 9 24.7 12.2
 -2 6 9 19.8 4.8
 -2 6 9 33 7
 1 -6 -9 2065.29 204.48
 1 -6 -9 2158.68 203.08
 -1 6 9 2034.4 203.58
 -1 6 9 2057.19 213.18
 -1 6 9 2326.47 204.88
 -1 6 9 2092.09 214.08
 0 -6 -9 453.05 50.59
 0 -6 -9 514.95 49.6
 0 6 9 536.45 59.09
 0 6 9 454.35 49.9
 0 6 9 564.64 61.79
 -1 -6 -9 1680.53 170.88
 -1 -6 -9 1832.02 169.68
 -1 -6 -9 1664.53 179.28
 -1 -6 -9 1811.32 169.88
 1 6 9 2003.5 184.08
 1 6 9 1605.54 169.88
 1 6 9 1777.12 177.98
 -2 -6 -9 469.45 44.6
 -2 -6 -9 433.56 47.5
 -2 -6 -9 423.16 55.29
 -2 -6 -9 438.56 44.7
 2 6 9 388.26 44.8
 2 6 9 575.04 64.79
 -3 -6 -9 236.38 24
 -3 -6 -9 202.18 35.6
 -3 -6 -9 239.28 23.7
 -3 -6 -9 208.48 25.3
 3 6 9 218.38 24.2
 -4 -6 -9 6.7 3.8
 -4 -6 -9 1.8 3.2
 -4 -6 -9 2.2 4.8
 -4 -6 -9 1 12.4
 4 6 9 3.4 21.9
 4 6 9 2.7 4
 -5 -6 -9 10.2 5
 -5 -6 -9 9.2 4.4
 5 6 9 7.4 4.3
 5 6 9 7.4 46.8
 5 6 9 14.1 15.3
 -6 -6 -9 279.67 52.49
 6 6 9 392.26 36.5
 -7 -6 -9 14.7 6.6
 -7 -6 -9 6.9 20.9
 7 6 9 9 12.8
 7 6 9 9.3 6.2
 7 6 9 6.1 6.4
 -8 -6 -9 550.14 52.89
 8 6 9 498.65 52.39
 8 6 9 453.45 54.39
 6 -7 -9 37.1 5.9
 6 -7 -9 34.7 8.8
 6 -7 -9 13.4 10.2
 -6 7 9 26 21
 -6 7 9 45.5 24.5
 -6 7 9 27.4 10.4
 5 -7 -9 39.3 10.8
 5 -7 -9 33.9 8.2
 5 -7 -9 38.5 6.3
 -5 7 9 46.2 22
 -5 7 9 34.9 19.8
 -5 7 9 42.8 10.8
 4 -7 -9 145.59 20.3
 4 -7 -9 167.18 16.9
 4 -7 -9 145.09 18.1
 -4 7 9 185.88 20.6
 -4 7 9 202.48 35.4
 -4 7 9 136.29 31.3
 -4 7 9 131.69 17.4
 3 -7 -9 289.17 27.4
 3 -7 -9 273.27 29.7
 -3 7 9 263.37 40.9
 -3 7 9 246.98 40.5
 -3 7 9 222.78 27.6
 -3 7 9 311.97 30.2
 2 -7 -9 666.53 69.49
 2 -7 -9 717.53 67.79
 -2 7 9 640.84 80.09
 -2 7 9 758.22 69.99
 -2 7 9 758.52 81.69
 -2 7 9 623.64 68.19
 1 -7 -9 211.38 23.5
 1 -7 -9 212.08 21.7
 -1 7 9 223.68 33.8
 -1 7 9 184.78 31.7
 -1 7 9 191.98 22.2
 0 -7 -9 2187.58 201.58
 0 -7 -9 1947.91 202.88
 0 7 9 2004.3 202.28
 0 7 9 2256.77 215.28
 -1 -7 -9 106.79 15.7
 -1 -7 -9 98.29 21.7
 -1 -7 -9 123.39 14.5
 -1 -7 -9 120.19 14.1
 1 7 9 147.49 15.6
 1 7 9 121.39 22.7
 1 7 9 160.48 30.6
 -2 -7 -9 795.62 74.09
 -2 -7 -9 754.12 75.79
 -2 -7 -9 673.63 83.49
 -2 -7 -9 799.42 74.39
 2 7 9 711.13 74.59
 2 7 9 781.12 82.49
 -3 -7 -9 71.59 23
 -3 -7 -9 106.49 12.4
 -3 -7 -9 108.49 12.7
 -3 -7 -9 86.09 14.7
 3 7 9 166.88 44.5
 3 7 9 83.59 12.9
 3 7 9 90.69 18.5
 -4 -7 -9 43.1 10.7
 -4 -7 -9 30.6 16.3
 -4 -7 -9 35.9 7.5
 -4 -7 -9 29.7 6.5
 4 7 9 19.9 6.7
 4 7 9 39.9 13
 4 7 9 51.99 33.4
 -5 -7 -9 16.7 7.8
 -5 -7 -9 23.4 6.4
 -5 -7 -9 20.3 6.7
 -5 -7 -9 10.5 16.7
 5 7 9 22.3 6.8
 5 7 9 35.4 12.4
 -6 -7 -9 38.5 9.8
 -6 -7 -9 30.6 21.6
 6 7 9 43.6 13
 6 7 9 46.1 10.1
 6 7 9 73.49 22.8
 -7 -7 -9 361.46 38.2
 7 7 9 333.67 38.4
 5 -8 -9 3.1 5.6
 5 -8 -9 -1.4 4.2
 5 -8 -9 5.1 9.2
 -5 8 9 7.7 20.5
 -5 8 9 1.3 9.1
 -5 8 9 -0.1 17.3
 4 -8 -9 152.28 19.3
 4 -8 -9 185.68 18.4
 4 -8 -9 156.58 22.2
 -4 8 9 165.58 36.6
 -4 8 9 164.28 41.9
 -4 8 9 132.49 18.8
 -4 8 9 200.48 22.9
 3 -8 -9 148.19 21.3
 3 -8 -9 183.18 19
 3 -8 -9 157.68 19.5
 -3 8 9 175.58 35.4
 -3 8 9 201.88 22.5
 -3 8 9 156.58 20
 -3 8 9 179.48 36
 2 -8 -9 895.01 79.89
 2 -8 -9 785.92 81.69
 -2 8 9 751.52 80.49
 -2 8 9 808.12 93.59
 -2 8 9 825.12 95.69
 1 -8 -9 790.42 73.09
 1 -8 -9 736.53 74.99
 -1 8 9 721.43 86.59
 -1 8 9 694.23 73.89
 -1 8 9 767.72 86.89
 0 -8 -9 437.66 41.2
 0 -8 -9 360.76 42.5
 0 8 9 434.26 56.09
 0 8 9 394.66 42.1
 0 8 9 393.96 53.09
 -1 -8 -9 992.5 87.89
 -1 -8 -9 944.31 87.29
 -1 -8 -9 854.51 89.09
 1 8 9 864.61 88.29
 1 8 9 787.22 96.69
 -2 -8 -9 5.7 3.8
 -2 -8 -9 -2.1 4
 -2 -8 -9 -0.1 9.7
 -2 -8 -9 2.9 6.7
 2 8 9 -6.3 21.5
 2 8 9 3.7 4.9
 2 8 9 4.7 11.1
 -3 -8 -9 233.48 24.2
 -3 -8 -9 210.18 27
 -3 -8 -9 237.48 24.6
 -3 -8 -9 196.48 34.3
 3 8 9 234.68 32.4
 3 8 9 190.68 25
 -4 -8 -9 31.1 17.3
 -4 -8 -9 38.5 11.5
 -4 -8 -9 38.1 8.1
 -4 -8 -9 27.6 6.5
 4 8 9 14.3 7
 4 8 9 28.6 11.9
 4 8 9 60.09 39.9
 -5 -8 -9 11.2 6.4
 -5 -8 -9 9.3 8.4
 -5 -8 -9 8.3 5
 -5 -8 -9 4.9 17.5
 5 8 9 12.5 7.8
 5 8 9 11.8 10.1
 -6 -8 -9 37.2 11.3
 -6 -8 -9 88.79 11.9
 -6 -8 -9 77.69 13.1
 -6 -8 -9 47.3 26.4
 6 8 9 62.19 12
 6 8 9 7 18.3
 4 -9 -9 5.5 5.1
 4 -9 -9 6.6 10.2
 4 -9 -9 8.4 6.7
 -4 9 9 8.3 21.7
 -4 9 9 0.5 21.6
 -4 9 9 9.2 10.7
 3 -9 -9 429.66 46.3
 3 -9 -9 484.75 43.4
 3 -9 -9 431.16 44.2
 -3 9 9 371.56 44.3
 -3 9 9 440.26 61.09
 -3 9 9 364.36 61.69
 2 -9 -9 2.1 7.5
 2 -9 -9 13.6 5.4
 -2 9 9 6.9 15.2
 -2 9 9 6.7 17.3
 -2 9 9 8.9 6.8
 1 -9 -9 893.31 90.09
 1 -9 -9 925.41 87.69
 -1 9 9 895.21 104.39
 -1 9 9 970.8 103.89
 -1 9 9 783.22 88.79
 0 -9 -9 387.76 43.3
 0 -9 -9 423.66 40.9
 0 -9 -9 433.76 41.7
 0 9 9 447.06 60.29
 0 9 9 338.17 53.19
 0 9 9 352.66 42.1
 -1 -9 -9 598.24 55.69
 -1 -9 -9 578.64 56.19
 -1 -9 -9 557.04 58.19
 1 9 9 496.65 56.79
 1 9 9 517.35 67.49
 -2 -9 -9 388.96 38.2
 -2 -9 -9 337.37 42.6
 -2 -9 -9 379.66 39.8
 2 9 9 315.77 38.8
 2 9 9 361.86 48.8
 -3 -9 -9 13.3 13.6
 -3 -9 -9 7.7 6
 -3 -9 -9 18.4 9.6
 -3 -9 -9 12.9 5.6
 3 9 9 23.6 32.1
 3 9 9 28.6 14
 3 9 9 16.3 8.2
 -4 -9 -9 75.29 12.1
 -4 -9 -9 66.99 25.2
 -4 -9 -9 68.79 15.9
 -4 -9 -9 85.79 14.3
 4 9 9 56.09 12.3
 4 9 9 65.29 20.6
 1 -10 -9 2.6 9.8
 1 -10 -9 9.4 5.9
 -1 10 9 -4.8 7.8
 -1 10 9 12.7 20.8
 -1 10 9 7.8 21.4
 0 -10 -9 762.72 67.39
 0 -10 -9 696.63 68.59
 0 -10 -9 588.94 69.69
 0 10 9 601.14 68.79
 0 10 9 669.03 85.39
 -1 -10 -9 58.99 11
 -1 -10 -9 44 13.7
 1 10 9 7.2 31.7
 1 10 9 49.3 11.9
 1 10 9 51.99 21.2
 -2 -10 -9 491.25 46.7
 2 10 9 385.36 58.39
 -3 -8 10 2.6 6.1
 -3 -8 10 0.2 4.8
 -2 -8 10 734.33 67.49
 -2 -8 10 646.74 72.29
 -2 -8 10 571.54 67.29
 -2 -8 10 781.92 68.79
 1 8 -10 295.07 56.79
 -1 -8 10 234.28 26
 -1 -8 10 201.18 30.6
 -1 -8 10 192.48 24.1
 -1 -8 10 217.88 24.5
 0 8 -10 488.25 73.49
 0 -8 10 439.96 43.8
 0 -8 10 441.66 51.79
 0 -8 10 351.16 43.2
 -1 8 -10 366.06 67.69
 1 -8 10 403.56 40.9
 1 -8 10 404.26 40.1
 1 -8 10 385.66 50.39
 -2 8 -10 131.09 42.9
 2 -8 10 131.69 27.6
 2 -8 10 142.99 17.2
 2 -8 10 125.19 15.4
 3 -8 10 171.88 19.4
 3 -8 10 199.18 36.1
 3 -8 10 170.48 21
 -4 8 -10 2.4 28.4
 4 -8 10 6.4 6.3
 4 -8 10 -2.5 14.7
 4 -8 10 6.4 4.9
 5 7 -10 5.1 8.6
 -5 -7 10 13.9 6.1
 -5 -7 10 3.6 9.2
 -5 -7 10 10.8 13.5
 -5 -7 10 1.3 4.6
 4 7 -10 17.7 8.8
 -4 -7 10 10.2 5.2
 -4 -7 10 8.9 4.9
 -3 -7 10 381.06 45.6
 -3 -7 10 444.56 42.9
 -3 -7 10 468.25 43.8
 2 7 -10 37.6 24.1
 -2 -7 10 10.1 8.2
 -2 -7 10 8.5 4.4
 -2 -7 10 17.4 4.9
 -1 -7 10 1313.67 136.19
 -1 -7 10 1532.35 137.19
 -1 -7 10 1319.37 142.39
 -1 -7 10 1479.05 136.29
 0 7 -10 12.8 19
 0 -7 10 6.1 4.2
 0 -7 10 13.7 9.5
 0 -7 10 6.2 4.6
 -1 7 -10 687.33 98.99
 1 -7 10 824.02 77.19
 1 -7 10 759.72 76.09
 1 -7 10 827.12 87.19
 -2 7 -10 87.79 33.1
 2 -7 10 108.29 12.6
 2 -7 10 86.09 10.9
 2 -7 10 82.49 22.2
 -3 7 -10 54.19 29.1
 3 -7 10 59.29 9.5
 3 -7 10 40.1 16
 3 -7 10 62.39 8.2
 -4 7 -10 15.4 22.1
 -4 7 -10 11.5 12.9
 4 -7 10 14.2 4.4
 4 -7 10 18.8 14.3
 4 -7 10 18.5 6.3
 -5 7 -10 2 15.1
 -5 7 -10 -4.4 23.8
 5 -7 10 15.6 5
 5 -7 10 18.7 17.9
 5 -7 10 21.2 6.6
 5 -7 10 8.8 5.5
 -6 7 -10 41.4 34.6
 6 -7 10 111.59 18.3
 6 -7 10 95.69 14.7
 6 6 -10 0.9 7.3
 -6 -6 10 -2.7 7.8
 -6 -6 10 5.6 23.7
 -6 -6 10 0.6 3.9
 -6 -6 10 -2.2 13.1
 -6 -6 10 0.9 5
 5 6 -10 11 6.6
 -5 -6 10 13 5.6
 -5 -6 10 9.9 4.1
 -5 -6 10 9.2 18.2
 -5 -6 10 7.6 6.3
 -5 -6 10 3.8 9.7
 4 6 -10 72.69 12.6
 -4 -6 10 73.69 10.4
 -4 -6 10 53.19 19.9
 -4 -6 10 62.29 14.7
 -4 -6 10 68.59 10.2
 -4 -6 10 88.19 9.9
 -3 -6 10 182.98 17.5
 -3 -6 10 134.59 22.1
 -3 -6 10 156.58 20.5
 -3 -6 10 142.59 18.6
 -3 -6 10 172.78 17.8
 -2 -6 10 1189.18 110.19
 -2 -6 10 1096.19 114.49
 -2 -6 10 1110.79 109.49
 1 6 -10 472.45 61.79
 -1 -6 10 334.37 36.2
 -1 -6 10 315.47 36.5
 -1 -6 10 379.16 43.3
 0 6 -10 1439.06 155.18
 0 -6 10 1402.46 131.99
 0 -6 10 1277.77 131.59
 0 -6 10 1371.76 140.29
 -1 6 -10 96.19 37.4
 1 -6 10 154.18 16.9
 1 -6 10 147.29 15.9
 1 -6 10 185.78 38.7
 -2 6 -10 538.05 82.69
 2 -6 10 605.54 63.19
 2 -6 10 651.33 61.89
 2 -6 10 732.83 75.79
 -3 6 -10 24.2 19.6
 -3 6 -10 23.4 11.2
 3 -6 10 31.3 6.5
 3 -6 10 33.5 15.1
 3 -6 10 18.4 4
 -4 6 -10 1 10.7
 -4 6 -10 0.9 17.4
 4 -6 10 4.2 11.1
 4 -6 10 -2.2 3.6
 4 -6 10 0.1 3.6
 4 -6 10 9.5 3.2
 -5 6 -10 7.1 20.8
 -5 6 -10 5 13.5
 5 -6 10 11.1 4.9
 5 -6 10 6.6 4.9
 5 -6 10 14.4 3.9
 5 -6 10 11.5 13.2
 -6 6 -10 21.4 20.7
 -6 6 -10 56.79 34.8
 6 -6 10 66.49 10.9
 6 -6 10 90.59 30.5
 6 -6 10 61.69 12.7
 -7 6 -10 112.19 47.8
 -7 6 -10 113.29 44.8
 7 -6 10 165.48 20.6
 7 -6 10 219.68 21.7
 7 5 -10 58.79 10.6
 -7 -5 10 12.5 30.1
 -7 -5 10 59.79 10.8
 -7 -5 10 55.39 11.6
 -7 -5 10 50.59 7.8
 6 5 -10 79.59 13.4
 -6 -5 10 42.3 50.29
 -6 -5 10 99.79 12.3
 -6 -5 10 105.69 15
 -6 -5 10 84.79 10.8
 -5 -5 10 13.9 5.6
 -5 -5 10 -0.1 3.5
 4 5 -10 198.18 22.2
 -4 -5 10 196.78 21
 -4 -5 10 186.18 26.7
 -4 -5 10 188.18 20.2
 -4 -5 10 195.78 21.6
 -3 -5 10 189.98 26.4
 -3 -5 10 228.08 22.7
 -3 -5 10 239.18 26.8
 -3 -5 10 214.88 23
 -2 -5 10 518.95 56.49
 -2 -5 10 555.14 53.99
 -2 -5 10 578.44 59.89
 -1 -5 10 418.36 46
 -1 -5 10 480.45 46
 -1 -5 10 490.85 53.39
 0 5 -10 1797.72 174.68
 0 -5 10 1513.75 159.78
 0 -5 10 1480.65 151.38
 -1 5 -10 1211.78 151.08
 1 -5 10 1517.25 144.29
 1 -5 10 1377.86 132.09
 -2 5 -10 31.2 12.4
 -2 5 -10 20.3 14
 2 -5 10 39.7 6.5
 2 -5 10 44.4 15.7
 -3 5 -10 297.57 40.8
 -3 5 -10 243.78 49
 3 -5 10 406.86 33.8
 -4 5 -10 4.6 13
 -4 5 -10 3 9.4
 4 -5 10 2.9 3.4
 4 -5 10 2.1 3.4
 4 -5 10 2.4 9.4
 -5 5 -10 4.4 15.3
 -5 5 -10 2.6 12.8
 5 -5 10 -0.4 3.5
 5 -5 10 -0.4 3.2
 5 -5 10 4.3 13
 -6 5 -10 5.6 17.1
 -6 5 -10 4.8 3.2
 -6 5 -10 10 17.9
 6 -5 10 15.5 5.6
 6 -5 10 10.7 15
 6 -5 10 2.8 4.2
 -7 5 -10 141.69 50.89
 -7 5 -10 135.39 45.5
 -7 5 -10 170.98 18.1
 7 -5 10 222.78 21.4
 7 -5 10 118.79 21.7
 -8 5 -10 109.79 42.4
 -8 5 -10 78.09 40.5
 -7 -4 10 42.7 9.9
 -7 -4 10 36.4 6.4
 -7 -4 10 58.39 9.6
 6 4 -10 63.39 9.8
 -6 -4 10 57.49 7.3
 -6 -4 10 62.19 9.2
 -6 -4 10 40.2 9.1
 5 4 -10 17 5.1
 -5 -4 10 22.2 6.4
 -5 -4 10 16 3.8
 -5 -4 10 10.5 4
 4 4 -10 40.1 7.9
 -4 -4 10 59.99 10
 -4 -4 10 40.8 7
 -4 -4 10 59.39 9.6
 -4 -4 10 45.3 13.9
 -4 -4 10 46.5 6.6
 -3 -4 10 806.12 83.99
 -3 -4 10 829.02 79.79
 -3 -4 10 793.82 79.59
 -3 -4 10 736.33 84.29
 -3 -4 10 931.11 79.39
 -2 -4 10 1.9 2.3
 -2 -4 10 2.4 2.1
 -2 -4 10 2.9 4.7
 -2 -4 10 3.7 6.2
 -1 -4 10 1531.05 163.78
 -1 -4 10 1708.83 163.98
 -1 -4 10 1934.61 173.18
 -1 -4 10 1681.93 167.78
 0 4 -10 1372.66 138.59
 0 -4 10 1057.99 117.49
 0 -4 10 1109.69 126.19
 0 -4 10 1391.56 124.89
 -1 4 -10 1593.54 182.78
 -1 4 -10 1748.63 169.38
 1 -4 10 1659.43 164.18
 1 -4 10 1947.91 177.68
 1 -4 10 1657.23 165.18
 -2 4 -10 1055.59 135.79
 -2 4 -10 1271.67 126.79
 2 -4 10 1345.27 119.89
 -3 4 -10 228.38 43.2
 -3 4 -10 240.38 36.1
 3 -4 10 338.47 43
 3 -4 10 280.87 28.2
 -4 4 -10 200.18 39.5
 -4 4 -10 192.68 33.4
 4 -4 10 183.08 21.4
 4 -4 10 245.08 22.6
 -5 4 -10 2.8 2.1
 -5 4 -10 -3.7 10.9
 -5 4 -10 2.2 10.2
 5 -4 10 4.4 3.6
 5 -4 10 1.7 3.2
 5 -4 10 12 14
 -6 4 -10 91.69 10.1
 -6 4 -10 51.39 22.7
 -6 4 -10 64.69 27.1
 6 -4 10 123.49 13.3
 6 -4 10 93.59 11.8
 -7 4 -10 11.2 23
 -7 4 -10 20.2 23.6
 -7 4 -10 11.9 4.5
 7 -4 10 12.1 5.5
 7 -4 10 15.8 5.9
 7 -4 10 27.4 18.8
 -8 4 -10 369.76 77.49
 -8 4 -10 507.05 46.8
 8 -4 10 572.74 49.3
 8 -4 10 382.06 47.6
 8 3 -10 36 11.4
 -8 -3 10 36 7.5
 -8 -3 10 31.2 9.3
 7 3 -10 569.54 59.99
 -7 -3 10 647.64 58.69
 -7 -3 10 520.75 57.09
 6 3 -10 4.4 5.6
 -6 -3 10 5.7 2.4
 -6 -3 10 0.9 4.6
 -6 -3 10 5.8 3.6
 -5 -3 10 15.5 3.1
 -5 -3 10 8.5 3.3
 -5 -3 10 9.9 4.5
 -4 -3 10 256.57 26.3
 -4 -3 10 256.77 25
 -4 -3 10 220.18 29.2
 -4 -3 10 271.67 25.9
 -3 -3 10 348.07 34.1
 -3 -3 10 372.16 33.9
 -3 -3 10 321.47 39.2
 -3 -3 10 332.87 33.3
 -3 -3 10 311.97 39.7
 -2 -3 10 681.63 71.69
 -2 -3 10 716.53 64.09
 -2 -3 10 559.54 63.99
 -2 -3 10 671.53 64.19
 -2 -3 10 677.83 69.59
 -1 -3 10 204.38 28.8
 -1 -3 10 182.48 20.5
 -1 -3 10 217.98 20.5
 -1 -3 10 176.68 20.5
 -1 -3 10 233.08 26.4
 0 3 -10 2969.8 267.87
 0 -3 10 2599.84 257.77
 0 -3 10 2642.74 253.27
 0 -3 10 2229.68 247.08
 -1 3 -10 252.27 32.2
 -1 3 -10 269.07 42.5
 1 -3 10 285.57 38.1
 1 -3 10 256.77 26.8
 -2 3 -10 2777.02 265.97
 -2 3 -10 2587.54 274.67
 -3 3 -10 518.35 66.89
 -3 3 -10 488.65 59.39
 3 -3 10 495.45 49
 -4 3 -10 356.86 50.39
 -4 3 -10 323.37 53.49
 4 -3 10 420.26 38
 -5 3 -10 37.2 17.9
 -5 3 -10 33.8 18.2
 -5 3 -10 52.09 6.1
 5 -3 10 50.49 7.3
 5 -3 10 104.99 25.5
 -6 3 -10 3.2 16.2
 -6 3 -10 -1.1 2.8
 -6 3 -10 0 12.1
 6 -3 10 4.8 3
 6 -3 10 9.3 14.8
 -7 3 -10 295.37 51.79
 -7 3 -10 205.28 50.09
 7 -3 10 260.37 27.6
 -8 3 -10 13.2 25.4
 -8 3 -10 11.5 20.5
 -8 3 -10 15.8 6.9
 8 -3 10 30.6 21.2
 8 -3 10 16.5 7
 -9 3 -10 439.26 86.29
 -9 3 -10 436.06 78.09
 9 -3 10 482.85 49.2
 8 2 -10 705.63 74.99
 -8 -2 10 730.13 72.29
 -8 -2 10 752.62 73.69
 7 2 -10 90.09 14.2
 -7 -2 10 61.99 11.8
 -7 -2 10 84.49 11.1
 6 2 -10 511.85 53.99
 -6 -2 10 553.74 53.09
 -6 -2 10 530.15 52.09
 -6 -2 10 443.06 54.39
 -6 -2 10 530.35 50.39
 -6 -2 10 591.34 53.19
 5 2 -10 0.8 3.4
 -5 -2 10 5.1 3.8
 -5 -2 10 1 1.6
 -5 -2 10 -0.5 2.4
 -5 -2 10 0.7 3.2
 4 2 -10 25.1 6
 -4 -2 10 31.6 5
 -4 -2 10 34.3 5.8
 -4 -2 10 28.5 4
 -4 -2 10 32.3 9.9
 -3 -2 10 47.4 6.9
 -3 -2 10 44.9 12
 -3 -2 10 52.69 12.7
 -3 -2 10 45.3 6
 -3 -2 10 67.89 6.9
 -2 -2 10 2338.07 254.77
 -2 -2 10 2953.1 261.87
 -2 -2 10 2664.73 254.77
 -2 -2 10 2790.02 263.07
 -2 -2 10 2630.44 255.07
 -1 -2 10 1064.09 103.39
 -1 -2 10 1063.19 103.39
 -1 -2 10 1062.19 103.49
 -1 -2 10 1062.99 109.19
 -1 -2 10 1142.99 112.99
 0 2 -10 401.56 42.4
 0 -2 10 330.07 36.3
 0 -2 10 411.86 47.1
 0 -2 10 334.67 35.6
 0 -2 10 396.76 42.9
 -1 2 -10 2246.98 242.38
 -1 2 -10 2100.49 232.68
 1 -2 10 2398.56 239.08
 1 -2 10 2745.83 237.38
 -2 2 -10 462.35 53.19
 -2 2 -10 427.86 58.89
 -3 2 -10 1283.87 145.99
 -3 2 -10 1454.45 142.39
 3 -2 10 1313.97 129.59
 -4 2 -10 104.79 25.6
 -4 2 -10 128.49 25.9
 4 -2 10 117.29 12.9
 -5 2 -10 144.29 33
 -5 2 -10 198.78 18.4
 5 -2 10 170.88 19.1
 -6 2 -10 76.59 25.6
 -6 2 -10 104.59 11
 -6 2 -10 50.99 27
 6 -2 10 74.79 10.9
 6 -2 10 151.88 32.7
 -7 2 -10 69.99 30.3
 -7 2 -10 71.39 27.4
 -7 2 -10 97.29 12.1
 7 -2 10 73.49 11.6
 7 -2 10 145.69 34
 -8 2 -10 379.26 35.5
 -8 2 -10 292.87 62.79
 -8 2 -10 281.37 56.19
 8 -2 10 331.07 35.7
 -9 2 -10 111.79 41.3
 -9 2 -10 212.28 21.7
 -9 2 -10 103.79 43
 9 -2 10 165.28 21.2
 8 1 -10 329.67 40.6
 -8 -1 10 390.26 38.6
 -8 -1 10 367.26 42.9
 -8 -1 10 409.06 40.2
 7 1 -10 359.76 39.7
 -7 -1 10 363.06 41.2
 -7 -1 10 381.86 37.7
 -7 -1 10 374.86 38.8
 6 1 -10 96.99 15.4
 -6 -1 10 81.29 13.6
 -6 -1 10 104.69 12.4
 5 1 -10 364.26 40.9
 -5 -1 10 389.36 42.6
 -5 -1 10 392.86 38.3
 -5 -1 10 389.46 40.6
 -5 -1 10 462.35 40.1
 4 1 -10 22.9 5.3
 -4 -1 10 17.3 2.6
 -4 -1 10 17.6 3.9
 -4 -1 10 20.3 4.7
 3 1 -10 265.27 27.3
 -3 -1 10 268.47 27.1
 -3 -1 10 272.17 26.6
 -3 -1 10 258.07 25.9
 -2 -1 10 480.65 52.29
 -2 -1 10 599.14 52.09
 -2 -1 10 566.04 59.89
 -2 -1 10 596.24 52.29
 -2 -1 10 440.66 57.59
 -1 -1 10 3040.3 283.97
 -1 -1 10 2922.11 274.97
 -1 -1 10 3159.68 282.17
 -1 -1 10 2599.54 274.57
 -1 -1 10 2726.53 274.77
 0 1 -10 1075.49 107.69
 0 -1 10 1015.5 110.09
 0 -1 10 1099.39 107.99
 0 -1 10 1004.9 100.29
 1 -1 10 4288.77 417.36
 -2 1 -10 1840.12 196.18
 -2 1 -10 2043.8 192.38
 2 -1 10 1807.92 180.78
 -3 1 -10 128.29 26.6
 -3 1 -10 156.48 26.2
 3 -1 10 140.59 14.8
 -4 1 -10 477.35 40
 -4 1 -10 338.67 52.99
 -4 1 -10 368.86 53.49
 4 -1 10 394.26 40.4
 -5 1 -10 9.8 3.2
 -5 1 -10 6.6 11.6
 -5 1 -10 1.2 7.7
 5 -1 10 12.4 3.4
 5 -1 10 5.8 12.1
 -6 1 -10 6.2 16.3
 -6 1 -10 -0.1 8.6
 -6 1 -10 5.7 3.8
 6 -1 10 -0.7 11.2
 6 -1 10 2 2.7
 -7 1 -10 15.3 15.5
 -7 1 -10 5.3 17.7
 -7 1 -10 11.9 4.6
 -7 1 -10 15.9 5.4
 7 -1 10 11.5 5
 7 -1 10 25.6 18.2
 -8 1 -10 100.59 40.9
 -8 1 -10 194.18 20
 -8 1 -10 199.88 20.2
 8 -1 10 123.39 19.2
 -9 1 -10 133.29 54.09
 -9 1 -10 127.89 43.1
 -9 1 -10 214.58 23.6
 9 -1 10 206.28 20.9
 9 -1 10 168.58 23.2
 9 0 -10 616.74 71.39
 -9 0 10 719.23 78.09
 -9 0 10 741.23 69.79
 8 0 -10 -6.2 6.1
 -8 0 10 8.1 7.1
 -8 0 10 -1.3 8.7
 -8 0 10 -0.8 4.3
 7 0 -10 561.34 60.79
 -7 0 10 609.94 64.99
 -7 0 10 607.04 60.69
 -7 0 10 622.24 59.69
 6 0 -10 173.68 21.3
 -6 0 10 203.58 21.5
 -6 0 10 170.08 24.3
 -6 0 10 217.08 20.4
 5 0 -10 212.48 21.4
 -5 0 10 201.18 21.1
 -5 0 10 192.88 20.1
 -5 0 10 175.88 24
 4 0 -10 159.98 18.7
 -4 0 10 189.08 18.2
 -4 0 10 171.68 18.9
 3 0 -10 20 4.8
 3 0 -10 21.9 4.2
 -3 0 10 27.4 3.8
 -3 0 10 20.3 2.6
 -3 0 10 25.7 4.7
 2 0 -10 1307.87 111.19
 2 0 -10 1092.59 111.89
 -2 0 10 1117.29 118.09
 -2 0 10 1168.98 110.69
 -2 0 10 1074.99 110.39
 -2 0 10 1172.68 111.39
 1 0 -10 133.19 15.2
 -1 0 10 134.99 14.7
 -1 0 10 139.69 20.9
 -1 0 10 152.48 14.1
 0 0 -10 7512.05 649.14
 0 0 -10 6600.54 640.34
 0 0 10 6387.66 640.04
 0 0 10 6369.76 647.44
 0 0 10 6799.12 649.64
 -1 0 -10 526.35 50.49
 -1 0 -10 529.35 59.49
 1 0 10 605.04 62.59
 1 0 10 487.15 50.19
 1 0 10 517.55 50.39
 1 0 10 521.75 59.39
 -2 0 -10 3701.43 347.57
 -2 0 -10 3506.55 335.07
 2 0 10 3374.26 335.27
 -3 0 -10 151.68 27.3
 -3 0 -10 154.48 27.6
 3 0 10 155.38 15.9
 -4 0 -10 573.04 49.8
 -4 0 -10 445.56 61.69
 -4 0 -10 458.15 63.29
 4 0 10 509.35 49.8
 -5 0 -10 222.08 20
 -5 0 -10 142.09 30.6
 -5 0 -10 221.68 19.5
 5 0 10 142.49 19.5
 -6 0 -10 32.8 15.8
 -6 0 -10 22.8 16.4
 -6 0 -10 50.59 7.3
 -6 0 -10 45 7.2
 6 0 10 86.69 26.6
 6 0 10 32.7 7
 -7 0 -10 186.58 20.4
 -7 0 -10 124.89 39
 -7 0 -10 207.48 20.6
 7 0 10 176.08 20.9
 -8 0 -10 4.7 5.2
 -8 0 -10 -4 5.1
 -8 0 -10 2 22.3
 -8 0 -10 -0.1 15.2
 8 0 10 11.8 17.1
 8 0 10 7.1 4
 8 0 10 2.9 5.4
 -9 0 -10 408.46 48.5
 -9 0 -10 286.17 72.39
 -9 0 -10 506.15 46.4
 9 0 10 385.66 48.4
 9 0 10 512.45 45.1
 9 -1 -10 63.99 12.8
 -9 1 10 89.09 35.1
 -9 1 10 65.69 11.8
 8 -1 -10 903.01 95.89
 -8 1 10 973.7 103.39
 -8 1 10 849.72 97.99
 -8 1 10 1097.49 94.89
 7 -1 -10 46.8 9.9
 -7 1 10 53.09 8.1
 -7 1 10 50.69 10.1
 -7 1 10 54.29 15.4
 6 -1 -10 838.82 84.69
 -6 1 10 906.11 85.19
 -6 1 10 783.02 89.49
 -6 1 10 925.91 83.99
 5 -1 -10 109.79 13.8
 5 -1 -10 92.39 12
 -5 1 10 99.19 12.6
 -5 1 10 110.99 11.6
 -5 1 10 89.79 16.3
 4 -1 -10 5.1 3.7
 4 -1 -10 6.5 2.8
 -4 1 10 10.4 2.6
 -4 1 10 14.9 4.5
 3 -1 -10 115.99 13.3
 3 -1 -10 102.99 11.7
 -3 1 10 103.89 11.3
 -3 1 10 115.49 12.5
 2 -1 -10 396.76 40.6
 2 -1 -10 424.46 39.4
 -2 1 10 395.06 39.1
 -2 1 10 395.16 38.9
 -2 1 10 384.36 40.1
 -2 1 10 442.66 48
 1 -1 -10 1879.71 171.98
 -1 1 10 1718.43 171.48
 -1 1 10 1741.83 170.48
 -1 1 10 1840.92 179.28
 0 -1 -10 1249.07 130.49
 0 -1 -10 1511.85 139.69
 0 1 10 1360.96 130.39
 0 1 10 1341.57 138.29
 -1 -1 -10 4677.23 419.66
 -1 -1 -10 4414.76 409.06
 1 1 10 3980.2 408.86
 1 1 10 3957.7 408.26
 1 1 10 4498.55 418.86
 -2 -1 -10 73.99 17
 -2 -1 -10 55.49 6
 -2 -1 -10 52.99 6.5
 2 1 10 54.49 6.3
 2 1 10 51.59 15.5
 2 1 10 58.49 16.6
 -3 -1 -10 2970.5 281.47
 -3 -1 -10 3034.8 265.77
 3 1 10 2381.86 265.87
 -4 -1 -10 20.2 12.6
 -4 -1 -10 24.6 4
 4 1 10 49.9 23.7
 4 1 10 22.8 12
 4 1 10 19.5 4.5
 -5 -1 -10 179.98 37.1
 -5 -1 -10 243.18 23.3
 5 1 10 224.88 23.6
 -6 -1 -10 12.3 3.7
 -6 -1 -10 -0.4 13.6
 6 1 10 20.3 14.6
 6 1 10 3.6 3.7
 6 1 10 10 3.5
 -7 -1 -10 27.9 6
 -7 -1 -10 45.8 7.7
 -7 -1 -10 19.1 19.5
 7 1 10 38.3 21.5
 7 1 10 31.6 6.6
 7 1 10 27.6 6.9
 -8 -1 -10 414.96 36.6
 -8 -1 -10 326.57 35.7
 8 1 10 334.27 35.2
 8 1 10 292.27 36.5
 -9 -1 -10 9.2 7.5
 -9 -1 -10 18.3 28
 9 1 10 22.3 17.8
 9 1 10 9.2 7.5
 9 1 10 15.7 5.8
 8 -2 -10 433.56 48.1
 -8 2 10 433.56 57.09
 -8 2 10 512.35 47.1
 -8 2 10 458.85 48.5
 7 -2 -10 617.44 67.59
 -7 2 10 710.13 68.29
 -7 2 10 655.63 76.69
 -7 2 10 728.53 67.09
 6 -2 -10 390.66 41.1
 6 -2 -10 392.36 42.8
 -6 2 10 367.96 47.6
 -6 2 10 441.36 40.7
 -6 2 10 422.66 41.8
 5 -2 -10 298.97 36.9
 5 -2 -10 306.47 33.8
 -5 2 10 357.86 36.8
 -5 2 10 382.26 33.7
 -5 2 10 311.97 40.1
 4 -2 -10 72.79 9.9
 4 -2 -10 69.19 8.1
 -4 2 10 74.19 9.2
 -4 2 10 68.09 7.7
 -4 2 10 43.6 12
 3 -2 -10 242.68 24.6
 3 -2 -10 221.18 23
 -3 2 10 200.08 30.8
 -3 2 10 254.27 24.2
 -3 2 10 229.48 22.7
 2 -2 -10 27.8 5.5
 2 -2 -10 27.7 3.9
 -2 2 10 32.5 10.8
 -2 2 10 29.6 5
 -2 2 10 37.3 3.8
 1 -2 -10 1725.03 160.68
 1 -2 -10 1848.42 162.28
 -1 2 10 1504.05 168.78
 -1 2 10 1666.53 161.78
 0 -2 -10 1175.78 121.79
 0 -2 -10 1221.88 113.29
 0 2 10 1123.49 112.59
 0 2 10 1143.29 112.99
 0 2 10 1221.08 121.69
 -1 -2 -10 1510.65 145.49
 -1 -2 -10 1512.15 146.49
 -1 -2 -10 1657.63 157.38
 1 2 10 1467.85 146.39
 1 2 10 1391.76 146.19
 1 2 10 1667.53 156.88
 -2 -2 -10 2553.54 239.28
 -2 -2 -10 2331.67 239.88
 -2 -2 -10 2876.61 254.37
 2 2 10 2525.15 239.28
 2 2 10 2312.77 239.78
 -3 -2 -10 139.89 28.1
 -3 -2 -10 162.68 16.1
 3 2 10 150.58 16.5
 3 2 10 161.18 16.2
 -4 -2 -10 2684.83 242.68
 -4 -2 -10 2458.95 259.27
 4 2 10 2520.35 242.88
 4 2 10 2469.85 242.88
 -5 -2 -10 15 3.9
 -5 -2 -10 10.2 12.7
 5 2 10 15 4.3
 5 2 10 24.8 23.8
 5 2 10 20 13.7
 5 2 10 18.1 4.6
 -6 -2 -10 39.8 19.9
 -6 -2 -10 74.29 9.3
 6 2 10 47.6 9.3
 6 2 10 74.29 9.3
 6 2 10 129.99 29
 -7 -2 -10 89.79 10.8
 -7 -2 -10 33.8 21.9
 7 2 10 69.89 11.3
 7 2 10 78.89 10.3
 -8 -2 -10 52.89 10.6
 -8 -2 -10 63.29 10.4
 -8 -2 -10 18.5 25.8
 8 2 10 58.09 9.6
 8 2 10 45.8 11.1
 8 2 10 80.29 25.8
 -9 -2 -10 355.26 37.7
 -9 -2 -10 305.17 37.6
 9 2 10 363.86 36.4
 8 -3 -10 109.19 16.2
 -8 3 10 130.69 17.1
 -8 3 10 98.89 27.3
 7 -3 -10 1058.09 108.59
 7 -3 -10 1113.29 106.99
 -7 3 10 1124.59 107.59
 -7 3 10 1059.19 117.29
 6 -3 -10 225.28 25.8
 6 -3 -10 255.67 28.2
 -6 3 10 255.47 27.1
 -6 3 10 241.38 34.7
 5 -3 -10 362.66 36
 5 -3 -10 304.87 33.7
 -5 3 10 322.17 42.1
 -5 3 10 362.36 35.2
 4 -3 -10 42.5 5.5
 4 -3 -10 29.7 7.2
 -4 3 10 31.5 11.8
 -4 3 10 32.4 6.8
 3 -3 -10 33.9 6.7
 3 -3 -10 31.8 4.7
 -3 3 10 35.9 12.9
 -3 3 10 42.2 6.5
 -3 3 10 33.6 4
 2 -3 -10 547.15 57.49
 2 -3 -10 627.74 59.39
 -2 3 10 640.44 58.89
 -2 3 10 593.84 66.99
 1 -3 -10 37.6 5.6
 1 -3 -10 28.4 3.5
 -1 3 10 24.2 4.7
 -1 3 10 28.9 10.7
 -1 3 10 27.2 3.9
 0 -3 -10 840.82 101.89
 0 -3 -10 977.6 94.39
 0 -3 -10 1005.6 93.19
 0 3 10 972.4 94.19
 0 3 10 1068.09 103.79
 0 3 10 971.2 93.59
 -1 -3 -10 197.48 21.2
 -1 -3 -10 216.48 20.2
 -1 -3 -10 185.58 29.2
 1 3 10 191.48 20.6
 1 3 10 220.18 30.5
 -2 -3 -10 1748.33 177.88
 -2 -3 -10 1868.81 190.88
 -2 -3 -10 1936.01 177.38
 2 3 10 2020.6 191.58
 2 3 10 1715.13 177.58
 -3 -3 -10 2309.37 224.48
 -3 -3 -10 2432.96 241.08
 -3 -3 -10 2437.06 225.28
 3 3 10 2335.47 224.48
 3 3 10 2238.48 224.78
 -4 -3 -10 499.35 66.89
 -4 -3 -10 553.94 50.69
 4 3 10 498.65 50.69
 4 3 10 493.55 50.79
 -5 -3 -10 235.68 44.2
 -5 -3 -10 328.67 30
 5 3 10 258.77 29.6
 5 3 10 314.47 30.3
 -6 -3 -10 86.89 10.1
 -6 -3 -10 37.7 19.9
 6 3 10 51.09 9.8
 6 3 10 73.39 9.8
 6 3 10 142.09 29.4
 -7 -3 -10 16 5.6
 -7 -3 -10 3.1 18
 7 3 10 2.8 4.1
 7 3 10 11.9 15.5
 7 3 10 4 4.2
 -8 -3 -10 190.48 19.6
 -8 -3 -10 100.89 40.3
 8 3 10 184.78 19.3
 8 3 10 124.59 20.5
 -9 -3 -10 401.66 40.2
 -9 -3 -10 370.06 39.7
 9 3 10 378.26 39.2
 9 3 10 323.87 41.5
 8 -4 -10 613.44 64.39
 8 -4 -10 678.13 66.99
 -8 4 10 700.53 65.29
 -8 4 10 540.55 77.89
 7 -4 -10 22.6 9.5
 7 -4 -10 22.5 7.1
 -7 4 10 16.4 13
 -7 4 10 26.9 7.6
 6 -4 -10 976.4 93.69
 6 -4 -10 906.01 91.39
 -6 4 10 828.92 101.99
 -6 4 10 1048 93.09
 5 -4 -10 54.99 10.5
 5 -4 -10 52.79 8.1
 -5 4 10 49.1 16.2
 -5 4 10 69.09 10.1
 4 -4 -10 181.08 21.9
 4 -4 -10 217.48 20.9
 -4 4 10 226.88 33.5
 -4 4 10 252.47 32.6
 3 -4 -10 114.29 12.9
 3 -4 -10 123.59 12.2
 3 -4 -10 134.59 15.1
 -3 4 10 135.19 14.5
 -3 4 10 109.59 12.4
 -3 4 10 138.39 24
 -3 4 10 107.39 20.2
 2 -4 -10 99.29 12.8
 2 -4 -10 109.29 10.9
 2 -4 -10 100.19 11.2
 -2 4 10 103.69 11.2
 -2 4 10 105.99 12.4
 -2 4 10 105.79 20.1
 1 -4 -10 1137.09 114.49
 1 -4 -10 1236.08 113.19
 -1 4 10 1107.49 113.29
 -1 4 10 1244.98 114.29
 -1 4 10 1171.88 123.29
 0 -4 -10 46 13.9
 0 -4 -10 47.7 5.7
 0 -4 -10 38 6.6
 0 4 10 46.6 6.9
 0 4 10 38.2 5.8
 0 4 10 50.99 13.6
 -1 -4 -10 2355.36 246.28
 -1 -4 -10 2555.84 235.08
 -1 -4 -10 2369.56 236.08
 -1 -4 -10 2473.95 235.18
 1 4 10 2243.08 235.38
 1 4 10 2789.62 248.18
 -2 -4 -10 5.8 9.2
 -2 -4 -10 11.5 4
 -2 -4 -10 9.2 2.8
 -2 -4 -10 19 3.6
 2 4 10 12.6 10.8
 2 4 10 9.3 3
 -3 -4 -10 2404.66 215.08
 -3 -4 -10 2124.89 215.78
 -3 -4 -10 2267.67 231.48
 3 4 10 2170.18 215.18
 -4 -4 -10 251.87 42.7
 4 4 10 256.87 27.1
 4 4 10 264.57 26.9
 -5 -4 -10 446.06 40.7
 -5 -4 -10 303.67 55.09
 5 4 10 435.56 40.8
 5 4 10 386.46 40.6
 -6 -4 -10 29.4 17.9
 -6 -4 -10 49.1 8.5
 6 4 10 52.29 8.5
 6 4 10 56.09 9.2
 6 4 10 97.49 26.6
 -7 -4 -10 16.3 5.9
 -7 -4 -10 -0.5 15.9
 7 4 10 4.8 5.7
 7 4 10 11.8 5.2
 7 4 10 12.7 14.9
 -8 -4 -10 101.89 13.6
 -8 -4 -10 44.6 29.1
 8 4 10 103.29 14
 8 4 10 105.19 17
 -9 -4 -10 1.8 7
 -9 -4 -10 19.2 28.5
 9 4 10 2.6 11.8
 9 4 10 6.7 10.4
 8 -5 -10 281.87 43.6
 8 -5 -10 270.47 30
 -8 5 10 177.88 45.7
 7 -5 -10 550.94 55.59
 7 -5 -10 716.93 66.69
 -7 5 10 503.35 70.79
 -7 5 10 488.25 59.59
 6 -5 -10 2.2 4.3
 6 -5 -10 3.5 7
 -6 5 10 4.8 6
 -6 5 10 -0.3 11
 5 -5 -10 500.25 51.89
 5 -5 -10 516.85 48.2
 5 -5 -10 469.35 49.8
 -5 5 10 516.95 63.89
 -5 5 10 419.06 60.49
 -5 5 10 576.34 51.79
 4 -5 -10 72.39 11.6
 4 -5 -10 79.49 7.9
 4 -5 -10 70.59 9.2
 -4 5 10 56.39 8.2
 -4 5 10 64.79 21.1
 -4 5 10 73.79 10.8
 -4 5 10 72.89 18.8
 3 -5 -10 34.1 5.9
 3 -5 -10 50.89 5.6
 -3 5 10 36.9 5.7
 -3 5 10 45.2 16.3
 -3 5 10 44.1 11
 2 -5 -10 187.18 23.4
 2 -5 -10 233.78 21.9
 2 -5 -10 225.58 22.2
 -2 5 10 196.28 22
 -2 5 10 220.88 23.4
 -2 5 10 225.08 32.9
 -2 5 10 214.18 31
 1 -5 -10 367.56 37.2
 1 -5 -10 378.76 35.7
 -1 5 10 384.66 37.2
 -1 5 10 320.87 35.8
 -1 5 10 356.46 45.9
 0 -5 -10 1789.92 167.38
 0 -5 -10 1745.23 178.08
 0 -5 -10 1589.34 168.28
 0 5 10 1853.91 179.28
 0 5 10 1636.44 167.58
 0 5 10 1872.11 168.58
 -1 -5 -10 655.23 70.59
 -1 -5 -10 692.23 80.59
 -1 -5 -10 773.22 69.79
 -1 -5 -10 744.53 69.69
 1 5 10 669.03 69.89
 1 5 10 751.92 82.19
 -2 -5 -10 3429.06 328.27
 -2 -5 -10 3407.46 313.87
 -2 -5 -10 3534.25 313.97
 -2 -5 -10 3201.78 314.87
 2 5 10 2852.51 313.87
 -3 -5 -10 74.09 10.5
 -3 -5 -10 72.39 9.2
 -3 -5 -10 63.99 21.4
 -3 -5 -10 69.79 8.9
 3 5 10 96.79 30.5
 3 5 10 59.99 9.3
 -4 -5 -10 1506.65 125.29
 -4 -5 -10 1162.28 141.39
 4 5 10 1177.88 124.99
 -5 -5 -10 100.09 12.3
 5 5 10 136.89 28
 5 5 10 77.19 11.8
 5 5 10 69.49 11.6
 5 5 10 192.08 71.99
 -6 -5 -10 52.49 24.8
 -6 -5 -10 64.79 10.1
 6 5 10 53.89 10.2
 6 5 10 117.49 27.9
 6 5 10 50.89 10.5
 -7 -5 -10 -2.8 17.4
 -7 -5 -10 4.4 4.9
 7 5 10 7.4 5.3
 7 5 10 3.4 6.2
 7 5 10 3.5 14.4
 -8 -5 -10 48.1 12.4
 -8 -5 -10 23.2 25.5
 8 5 10 0 12
 8 5 10 46.4 9
 8 5 10 25.7 10.3
 7 -6 -10 367.16 38.5
 7 -6 -10 322.27 40.7
 -7 6 10 416.86 40.9
 -7 6 10 307.27 56.69
 -7 6 10 360.56 56.59
 6 -6 -10 504.55 48.2
 6 -6 -10 437.26 50.49
 6 -6 -10 519.85 53.39
 -6 6 10 494.75 66.89
 -6 6 10 493.95 67.79
 -6 6 10 561.34 52.99
 5 -6 -10 52.29 6.9
 5 -6 -10 48 8.9
 5 -6 -10 62.19 12.4
 -5 6 10 63.89 11.7
 -5 6 10 67.99 23.4
 -5 6 10 56.99 21.3
 4 -6 -10 217.38 23.4
 4 -6 -10 207.58 25.3
 4 -6 -10 216.48 22.2
 -4 6 10 222.88 36.2
 -4 6 10 199.18 22.7
 -4 6 10 248.38 25.6
 -4 6 10 246.78 37.8
 3 -6 -10 15.4 6
 3 -6 -10 7.7 3.1
 3 -6 -10 13.6 3.9
 -3 6 10 9.4 5
 -3 6 10 11.2 9.9
 -3 6 10 15 3.9
 -3 6 10 14.7 13.1
 2 -6 -10 20.9 5.8
 2 -6 -10 23.9 4.7
 -2 6 10 26.4 6.4
 -2 6 10 25.1 13.6
 -2 6 10 27.5 5.1
 -2 6 10 19.1 10.2
 1 -6 -10 117.49 12.7
 -1 6 10 113.19 22
 -1 6 10 107.39 13.2
 -1 6 10 114.79 23.3
 0 -6 -10 1366.36 118.69
 0 -6 -10 1107.19 119.59
 0 6 10 1167.48 118.89
 0 6 10 1313.27 131.49
 0 6 10 1183.28 127.69
 -1 -6 -10 918.81 86.29
 -1 -6 -10 923.01 86.49
 -1 -6 -10 842.52 96.89
 -1 -6 -10 829.52 87.59
 1 6 10 975.1 100.79
 1 6 10 837.02 86.69
 -2 -6 -10 852.91 105.79
 -2 -6 -10 769.72 95.89
 -2 -6 -10 1064.09 95.89
 -2 -6 -10 1004.1 94.39
 2 6 10 1198.48 115.29
 -3 -6 -10 1035.9 94.09
 -3 -6 -10 931.21 109.19
 -3 -6 -10 1068.39 94.39
 -3 -6 -10 858.91 95.29
 3 6 10 908.41 94.39
 -4 -6 -10 291.27 49.1
 -4 -6 -10 277.27 33.7
 -4 -6 -10 343.57 32.5
 -4 -6 -10 370.16 33.1
 4 6 10 266.27 32.6
 -5 -6 -10 724.23 64.09
 -5 -6 -10 535.95 80.39
 5 6 10 631.44 63.89
 -6 -6 -10 -5.8 16.4
 -6 -6 -10 4 5.3
 6 6 10 7.7 5.4
 6 6 10 10.7 15.6
 -7 -6 -10 0.4 5.5
 -7 -6 -10 -5.8 20.9
 7 6 10 9.5 16.3
 7 6 10 5 6.2
 -8 -6 -10 13.2 8
 -8 -6 -10 3.1 29.8
 8 6 10 14 8
 8 6 10 3.6 10.1
 6 -7 -10 533.45 64.79
 6 -7 -10 657.13 63.19
 -6 7 10 667.73 65.59
 -6 7 10 632.24 82.39
 -6 7 10 616.84 83.79
 5 -7 -10 346.07 40.9
 5 -7 -10 368.46 36.9
 5 -7 -10 334.37 38.5
 -5 7 10 430.16 57.99
 -5 7 10 346.97 55.29
 -5 7 10 434.96 41.5
 4 -7 -10 94.29 13.2
 4 -7 -10 99.69 11.9
 4 -7 -10 91.49 15.8
 -4 7 10 113.59 15.7
 -4 7 10 118.39 13.1
 -4 7 10 99.79 27.1
 -4 7 10 115.39 30.2
 3 -7 -10 51.59 8.2
 3 -7 -10 47.5 7.2
 3 -7 -10 40.8 8.8
 -3 7 10 49.6 19.3
 -3 7 10 62.19 23.3
 -3 7 10 59.19 10.7
 -3 7 10 41 7.7
 2 -7 -10 23.9 7
 2 -7 -10 23.5 5
 -2 7 10 28.1 16
 -2 7 10 23 6.7
 -2 7 10 33.4 16.5
 -2 7 10 26.3 5.9
 1 -7 -10 175.08 18.2
 1 -7 -10 168.38 20
 -1 7 10 161.48 28.9
 -1 7 10 163.18 19.1
 -1 7 10 168.28 31
 0 -7 -10 70.39 12.2
 0 -7 -10 92.69 11
 0 7 10 90.09 11.7
 0 7 10 84.19 20
 0 7 10 98.49 24.1
 -1 -7 -10 1517.25 140.29
 -1 -7 -10 1314.87 141.49
 -1 -7 -10 1591.04 140.69
 -1 -7 -10 1338.57 150.18
 1 7 10 1702.43 157.98
 1 7 10 1401.66 149.79
 1 7 10 1322.67 140.69
 -2 -7 -10 219.18 21.8
 -2 -7 -10 162.58 22.8
 -2 -7 -10 198.98 21.9
 -2 -7 -10 179.58 32.4
 2 7 10 175.28 22.1
 2 7 10 282.87 45.7
 2 7 10 217.98 30.7
 -3 -7 -10 1354.36 120.99
 -3 -7 -10 1159.68 134.39
 -3 -7 -10 1200.38 122.59
 3 7 10 1377.46 129.59
 3 7 10 1106.69 121.19
 -4 -7 -10 516.75 50.39
 -4 -7 -10 434.86 65.59
 -4 -7 -10 544.35 50.99
 -4 -7 -10 446.86 52.19
 4 7 10 485.45 51.19
 4 7 10 539.15 57.59
 -5 -7 -10 211.68 30.3
 -5 -7 -10 304.37 29.1
 -5 -7 -10 337.87 30.1
 -5 -7 -10 200.18 45.3
 5 7 10 246.08 29.8
 5 7 10 281.87 34.6
 -6 -7 -10 211.08 22.3
 -6 -7 -10 115.49 39.2
 6 7 10 184.48 25.3
 6 7 10 182.58 24.2
 -7 -7 -10 12.8 25.7
 -7 -7 -10 31.5 8.9
 7 7 10 13.8 8.5
 7 7 10 1.3 7.8
 7 7 10 7.8 16.6
 5 -8 -10 601.64 60.49
 5 -8 -10 630.14 58.69
 5 -8 -10 524.05 62.39
 -5 8 10 507.35 79.69
 -5 8 10 684.73 63.39
 -5 8 10 604.04 80.49
 4 -8 -10 19.7 5.2
 4 -8 -10 19.8 6.4
 4 -8 -10 31.7 10.9
 -4 8 10 16.3 6
 -4 8 10 9.2 17.4
 -4 8 10 18.1 13.1
 -4 8 10 6.2 18.5
 3 -8 -10 55.69 8.6
 3 -8 -10 52.69 9.3
 3 -8 -10 55.59 11.5
 -3 8 10 56.99 22.1
 -3 8 10 43.8 9.3
 -3 8 10 72.69 24.3
 -3 8 10 55.29 11
 2 -8 -10 5.9 5.8
 2 -8 -10 3.2 3.6
 -2 8 10 7.1 5.4
 -2 8 10 7.2 14.6
 -2 8 10 6.4 12.6
 -2 8 10 8.1 6.6
 1 -8 -10 291.87 33.2
 1 -8 -10 295.57 30.9
 -1 8 10 345.97 47.3
 -1 8 10 291.47 32
 -1 8 10 276.27 44
 0 -8 -10 347.27 40.2
 0 -8 -10 382.96 38.3
 0 8 10 424.26 55.29
 0 8 10 349.57 39.2
 0 8 10 384.36 51.09
 -1 -8 -10 155.18 17.7
 -1 -8 -10 167.88 17.5
 -1 -8 -10 124.09 19.2
 1 8 10 139.29 27.7
 1 8 10 192.58 38.9
 1 8 10 125.59 18.2
 -2 -8 -10 1157.28 117.89
 -2 -8 -10 1265.57 116.19
 -2 -8 -10 1115.09 125.99
 -2 -8 -10 1310.67 115.89
 2 8 10 1115.49 116.59
 2 8 10 1156.98 125.49
 -3 -8 -10 5 4.7
 -3 -8 -10 2.3 7.2
 -3 -8 -10 2.8 4.2
 -3 -8 -10 9.5 14.1
 3 8 10 8.8 27.5
 3 8 10 3.8 9.7
 3 8 10 2.8 5.5
 -4 -8 -10 614.14 84.19
 -4 -8 -10 783.22 70.19
 -4 -8 -10 656.93 72.49
 4 8 10 757.32 77.99
 4 8 10 675.43 71.19
 -5 -8 -10 105.09 35.2
 -5 -8 -10 170.58 17.6
 -5 -8 -10 105.89 19.8
 -5 -8 -10 123.79 17.5
 5 8 10 148.59 23.7
 5 8 10 105.79 18.4
 -6 -8 -10 213.78 49.4
 -6 -8 -10 187.48 29.3
 6 8 10 309.77 29.8
 4 -9 -10 383.66 40.9
 4 -9 -10 379.46 44.3
 4 -9 -10 405.16 39.6
 -4 9 10 303.27 40.5
 -4 9 10 457.15 44.7
 -4 9 10 426.36 62.99
 3 -9 -10 27.8 9.2
 3 -9 -10 22 6.8
 3 -9 -10 13.9 5.5
 -3 9 10 18 7.4
 -3 9 10 5.3 17.3
 -3 9 10 0.5 19.4
 2 -9 -10 28 6.3
 2 -9 -10 32.8 11.9
 -2 9 10 32.3 21.6
 -2 9 10 14.4 6.9
 -2 9 10 15.1 19.1
 1 -9 -10 14 5.1
 1 -9 -10 5 7.6
 -1 9 10 7.4 16.8
 -1 9 10 6.2 6.1
 -1 9 10 6.1 13
 0 -9 -10 292.87 36.8
 0 -9 -10 297.67 34.1
 0 -9 -10 351.76 35.2
 0 9 10 302.37 48.5
 0 9 10 428.26 56.09
 0 9 10 333.17 36.1
 -1 -9 -10 299.17 30.4
 -1 -9 -10 283.07 29.6
 -1 -9 -10 241.78 32.1
 1 9 10 400.66 59.59
 1 9 10 222.98 30.7
 1 9 10 256.07 41.9
 -2 -9 -10 217.58 37.3
 -2 -9 -10 263.47 32.4
 -2 -9 -10 275.07 28.8
 2 9 10 238.28 31.6
 2 9 10 262.27 40.1
 -3 -9 -10 558.24 50.89
 -3 -9 -10 523.45 51.39
 -3 -9 -10 447.36 61.19
 -3 -9 -10 477.55 53.79
 3 9 10 454.95 52.29
 3 9 10 509.95 61.39
 -4 -9 -10 26.8 18.9
 -4 -9 -10 35.9 8.1
 -4 -9 -10 27.2 12.7
 -4 -9 -10 43.6 9.3
 4 9 10 21.9 15.1
 4 9 10 33 9.4
 4 9 10 60.39 45.8
 1 -10 -10 11.1 6.1
 1 -10 -10 7.3 11.8
 -1 10 10 19.7 22.3
 -1 10 10 10.3 9.3
 -1 10 10 34 25.6
 0 -10 -10 6.4 6.8
 0 -10 -10 -2.1 10
 0 -10 -10 -0.4 5.5
 0 10 10 -0.8 26.7
 0 10 10 -5 7.8
 -1 -10 -10 422.46 52.19
 -1 -10 -10 345.87 37.9
 -1 -10 -10 400.66 39.7
 1 10 10 329.57 39.8
 1 10 10 329.67 53.79
 -3 -8 11 6.2 8.8
 -3 -8 11 5.3 8.6
 -3 -8 11 7.6 5.4
 2 8 -11 9.4 27.8
 -2 -8 11 6.6 5.3
 -2 -8 11 7.9 6.8
 -2 -8 11 -1.4 9
 -2 -8 11 3.3 5.8
 1 8 -11 365.06 64.19
 -1 -8 11 245.88 25.1
 -1 -8 11 199.98 26
 -1 -8 11 198.98 31.4
 -1 -8 11 219.08 25.2
 0 8 -11 258.17 57.99
 0 -8 11 235.98 26.5
 0 -8 11 275.77 27.2
 0 -8 11 224.28 34.9
 -1 8 -11 234.68 57.79
 1 -8 11 266.07 29.7
 1 -8 11 268.87 28.5
 1 -8 11 304.07 41
 -2 8 -11 515.15 92.29
 2 -8 11 713.83 77.89
 2 -8 11 651.93 65.19
 2 -8 11 657.73 63.59
 -3 8 -11 33.6 29.9
 3 -8 11 58.39 9.9
 3 -8 11 77.69 25.6
 3 -8 11 83.49 11.9
 -4 8 -11 367.46 80.39
 4 -8 11 544.95 78.39
 -4 -7 11 80.99 11.1
 -4 -7 11 63.89 11.6
 -3 -7 11 9.7 5.5
 -3 -7 11 10.7 7.3
 -3 -7 11 14.6 5.1
 2 7 -11 106.89 37.3
 -2 -7 11 51.19 14.8
 -2 -7 11 66.89 9.9
 -2 -7 11 66.19 10.7
 1 7 -11 -5.3 20.9
 -1 -7 11 -1.4 4.5
 -1 -7 11 -1.3 7.2
 -1 -7 11 -0.3 3.9
 -1 -7 11 0.7 4.5
 0 7 -11 965.5 110.79
 0 -7 11 763.72 88.59
 0 -7 11 799.72 80.69
 0 -7 11 827.52 80.19
 -1 7 -11 64.59 28.6
 1 -7 11 60.99 8.8
 1 -7 11 61.39 9.8
 1 -7 11 59.89 18.3
 -2 7 -11 452.95 77.39
 2 -7 11 541.35 53.79
 2 -7 11 630.84 67.09
 2 -7 11 503.65 52.09
 -3 7 -11 320.67 67.59
 3 -7 11 378.06 41.4
 3 -7 11 476.05 43.6
 3 -7 11 523.35 59.19
 -4 7 -11 74.29 37.3
 -4 7 -11 102.39 23
 4 -7 11 127.49 15.3
 4 -7 11 105.49 15.8
 -5 7 -11 353.26 69.39
 -5 7 -11 298.17 45.4
 5 -7 11 300.67 33.1
 -6 -6 11 635.24 99.69
 -6 -6 11 779.42 80.89
 -6 -6 11 1035.4 84.69
 -6 -6 11 828.92 91.89
 -6 -6 11 906.11 82.49
 -5 -6 11 114.99 13.3
 -5 -6 11 92.49 21.7
 -5 -6 11 86.79 28.2
 -5 -6 11 140.59 16.6
 -5 -6 11 123.49 16.9
 -4 -6 11 283.67 27.8
 -4 -6 11 201.28 38.8
 -4 -6 11 285.77 33.2
 -4 -6 11 228.08 31.2
 -4 -6 11 292.17 27.1
 -3 -6 11 14.6 6.3
 -3 -6 11 17.2 10.5
 -3 -6 11 9.2 4.2
 -3 -6 11 13.9 5
 -3 -6 11 18.1 7.6
 -2 -6 11 16.4 4.7
 -2 -6 11 20.6 8.8
 -2 -6 11 14.2 4.2
 -1 -6 11 383.76 35.3
 -1 -6 11 318.37 41.7
 -1 -6 11 328.67 35.4
 0 6 -11 84.29 31.6
 0 -6 11 77.09 10.7
 0 -6 11 91.69 11
 0 -6 11 84.19 18.8
 -1 6 -11 918.51 118.29
 1 -6 11 961.6 95.49
 1 -6 11 1022.5 96.69
 1 -6 11 1043.1 107.29
 -2 6 -11 9.2 15.9
 -2 6 -11 4.5 4.7
 2 -6 11 -0.7 2.9
 2 -6 11 0.8 9
 2 -6 11 2.6 2.6
 -3 6 -11 683.23 73.99
 -3 6 -11 553.54 88.79
 3 -6 11 725.43 81.79
 3 -6 11 731.63 67.99
 -4 6 -11 160.68 29.8
 -4 6 -11 118.39 39.4
 4 -6 11 159.18 18.5
 4 -6 11 171.58 33
 4 -6 11 167.88 18.7
 -5 6 -11 259.77 58.29
 -5 6 -11 261.97 44.3
 5 -6 11 337.17 32.3
 5 -6 11 321.47 32.5
 -6 6 -11 162.68 38.2
 -6 6 -11 191.18 54.09
 6 -6 11 232.08 28.8
 6 -6 11 184.58 21.8
 -7 6 -11 9.3 25.5
 7 -6 11 25.2 8.1
 -6 -5 11 80.69 11.9
 -6 -5 11 72.69 10.4
 -6 -5 11 124.29 15.2
 -5 -5 11 795.12 75.89
 -5 -5 11 872.11 76.99
 -5 -5 11 750.02 74.79
 -5 -5 11 685.63 83.19
 -4 -5 11 23.2 5.5
 -4 -5 11 36 7.4
 -4 -5 11 23.6 10.2
 -3 -5 11 140.79 16.3
 -3 -5 11 135.59 19.7
 -3 -5 11 141.49 20.4
 -3 -5 11 136.59 15.8
 -2 -5 11 -0.2 2.4
 -2 -5 11 1.5 2.4
 -2 -5 11 1.9 5.4
 -2 -5 11 -1.3 5.5
 1 5 -11 156.88 35.1
 -1 -5 11 108.49 19.7
 -1 -5 11 99.39 12.8
 -1 -5 11 105.39 13.9
 -1 -5 11 110.39 16.3
 0 5 -11 410.06 60.49
 0 -5 11 381.66 39.8
 0 -5 11 394.56 48.5
 -1 5 -11 370.16 61.39
 1 -5 11 415.76 42.3
 1 -5 11 468.05 54.59
 1 -5 11 470.55 43.7
 -2 5 -11 1418.56 143.39
 -2 5 -11 1208.28 158.28
 2 -5 11 1662.93 157.68
 2 -5 11 1424.46 137.99
 -3 5 -11 80.49 28.5
 -3 5 -11 82.89 20
 3 -5 11 89.89 11.8
 3 -5 11 110.09 24.3
 -4 5 -11 1200.08 133.59
 -4 5 -11 1141.09 145.39
 4 -5 11 1456.55 123.79
 4 -5 11 1251.07 122.89
 -5 5 -11 11.8 16.3
 -5 5 -11 18.4 15
 5 -5 11 17.5 5.6
 5 -5 11 24.7 16.9
 5 -5 11 16 4.5
 -6 5 -11 206.08 43
 -6 5 -11 229.68 52.29
 6 -5 11 230.68 24.7
 -7 5 -11 -2.4 20.8
 -7 5 -11 5.9 22.8
 7 -5 11 8.8 18.1
 7 -5 11 9.2 6
 7 -5 11 3.9 6.6
 -7 -4 11 629.54 55.89
 -7 -4 11 491.15 52.09
 -6 -4 11 393.46 38.5
 -6 -4 11 327.17 35.6
 -6 -4 11 387.56 37.4
 -5 -4 11 314.17 30.1
 -5 -4 11 270.37 28.9
 -5 -4 11 262.57 27.8
 -4 -4 11 524.35 53.39
 -4 -4 11 546.55 52.19
 -4 -4 11 496.75 52.69
 -4 -4 11 560.14 56.89
 -4 -4 11 529.05 60.39
 -3 -4 11 1.8 2.3
 -3 -4 11 0.8 2.4
 -3 -4 11 15.7 3.9
 -3 -4 11 10.5 7.2
 -3 -4 11 -0.3 6
 -2 -4 11 58.39 7.9
 -2 -4 11 56.49 11.7
 -2 -4 11 58.29 7.9
 -2 -4 11 68.49 14.7
 -2 -4 11 60.09 7.8
 1 4 -11 4.9 12
 -1 -4 11 5 7.1
 -1 -4 11 1 2
 -1 -4 11 -0.3 2
 -1 -4 11 4.2 5.3
 0 4 -11 404.16 57.69
 0 -4 11 401.26 45
 0 -4 11 362.86 37.8
 0 -4 11 353.76 47.1
 -1 4 -11 601.54 83.19
 -1 4 -11 681.93 71.09
 1 -4 11 710.93 77.49
 1 -4 11 705.93 65.39
 1 -4 11 628.54 63.99
 -2 4 -11 756.62 108.69
 -2 4 -11 859.31 99.09
 2 -4 11 1149.29 108.29
 2 -4 11 1048.6 92.89
 -3 4 -11 1446.06 171.98
 -3 4 -11 1481.75 151.98
 -4 4 -11 205.98 34.6
 -4 4 -11 205.88 41.8
 4 -4 11 216.78 24.6
 4 -4 11 266.67 24.8
 -5 4 -11 543.65 73.69
 -5 4 -11 545.05 81.09
 5 -4 11 689.93 60.29
 -6 4 -11 26.3 18.9
 -6 4 -11 37.8 24.1
 6 -4 11 40.3 8.6
 6 -4 11 84.79 28.4
 6 -4 11 36.1 7.5
 -7 4 -11 31.6 26.9
 -7 4 -11 37.4 6.7
 -7 4 -11 22.5 22.9
 7 -4 11 32.1 8
 7 -4 11 36.3 7.9
 7 -4 11 65.69 26.4
 -8 4 -11 11.4 28.2
 -8 4 -11 -2.9 5.2
 -8 4 -11 1.6 27.1
 8 -4 11 6.7 6.8
 8 -4 11 17.6 21.7
 8 -4 11 5.8 6.3
 8 3 -11 648.04 75.09
 -8 -3 11 781.92 72.39
 7 3 -11 9.1 7.9
 -7 -3 11 -2.4 5.1
 -7 -3 11 0 4.2
 -6 -3 11 1311.07 126.49
 -6 -3 11 1233.08 124.89
 -6 -3 11 1396.06 127.39
 -5 -3 11 287.17 34.1
 -5 -3 11 319.37 32.4
 -5 -3 11 290.67 30.4
 -5 -3 11 356.36 31.9
 -4 -3 11 312.27 33.4
 -4 -3 11 351.36 33.1
 -4 -3 11 304.77 37.7
 -4 -3 11 305.47 32.2
 -4 -3 11 370.76 42.2
 -3 -3 11 407.96 35.4
 -3 -3 11 378.26 36.1
 -3 -3 11 351.86 42.2
 -3 -3 11 320.27 35.5
 -3 -3 11 328.07 41.9
 -2 -3 11 69.89 8.2
 -2 -3 11 79.39 8.5
 -2 -3 11 70.69 8.6
 -2 -3 11 63.69 15.2
 -2 -3 11 61.89 13.4
 -1 -3 11 4.2 2.1
 -1 -3 11 1.6 5.8
 -1 -3 11 1.5 4.3
 -1 -3 11 1.4 1.9
 -1 -3 11 2.7 1.8
 0 3 -11 22.9 15.8
 0 -3 11 17 7.6
 0 -3 11 19.3 3.2
 0 -3 11 19.7 4
 0 -3 11 16.5 8.8
 -1 3 -11 1265.47 123.69
 -1 3 -11 977.4 107.19
 1 -3 11 982.5 101.09
 -2 3 -11 432.96 68.29
 -2 3 -11 537.05 62.09
 2 -3 11 668.63 69.89
 -3 3 -11 1829.92 177.48
 -3 3 -11 1582.24 183.58
 3 -3 11 1728.23 165.18
 -4 3 -11 537.75 75.69
 -4 3 -11 583.44 70.39
 4 -3 11 612.54 57.59
 -5 3 -11 434.16 60.79
 -5 3 -11 358.96 53.59
 -6 3 -11 367.96 58.59
 -6 3 -11 403.16 36.7
 -6 3 -11 307.77 54.79
 6 -3 11 370.36 38
 -7 3 -11 86.29 9.9
 -7 3 -11 57.99 26.9
 -7 3 -11 39.3 24.7
 7 -3 11 145.69 36.1
 7 -3 11 56.79 10.7
 -8 3 -11 -7.1 25.2
 -8 3 -11 4.3 22.7
 -8 3 -11 0.7 5.3
 8 -3 11 -7.9 19
 8 -3 11 -0.1 5.2
 9 -3 11 0.9 10.4
 8 2 -11 75.69 15.4
 -8 -2 11 73.89 11.8
 -8 -2 11 100.69 14.7
 7 2 -11 949.11 105.29
 -7 -2 11 1091.09 104.39
 -7 -2 11 1123.29 103.49
 6 2 -11 1.2 4.7
 -6 -2 11 -1.3 3.1
 -6 -2 11 3.3 1.6
 -6 -2 11 4.1 4.2
 -6 -2 11 8.4 4.4
 5 2 -11 1136.99 115.59
 -5 -2 11 1279.37 114.99
 -5 -2 11 1190.98 112.99
 -5 -2 11 1018.3 118.69
 -5 -2 11 1294.47 114.49
 -4 -2 11 4.5 2
 -4 -2 11 4.7 6
 -4 -2 11 4.7 3
 -4 -2 11 6.9 2.9
 -3 -2 11 716.43 73.69
 -3 -2 11 692.93 65.39
 -3 -2 11 668.53 64.89
 -3 -2 11 577.74 71.59
 -3 -2 11 707.53 65.89
 -2 -2 11 404.96 36
 -2 -2 11 351.66 43.8
 -2 -2 11 346.97 36
 -2 -2 11 359.46 42.4
 -2 -2 11 352.06 35.7
 -1 -2 11 133.89 13.5
 -1 -2 11 117.39 18.8
 -1 -2 11 145.79 13.3
 -1 -2 11 121.69 21.4
 -1 -2 11 110.69 13.1
 0 2 -11 286.87 37.9
 0 -2 11 354.86 39.5
 0 -2 11 301.57 31.4
 0 -2 11 347.27 32.3
 0 -2 11 345.47 43.1
 -1 2 -11 592.84 71.89
 -1 2 -11 478.05 60.29
 1 -2 11 588.74 63.59
 1 -2 11 565.54 66.09
 -2 2 -11 4472.25 484.85
 -2 2 -11 5317.97 479.05
 -3 2 -11 38.8 15
 -3 2 -11 29.9 14.1
 3 -2 11 85.19 30.4
 3 -2 11 48.6 6.2
 3 -2 11 84.39 21.8
 -4 2 -11 1646.94 178.38
 -4 2 -11 1584.04 173.28
 4 -2 11 1731.43 159.48
 -5 2 -11 193.58 37.8
 -5 2 -11 167.78 35
 5 -2 11 224.68 21.5
 -6 2 -11 421.36 63.79
 -6 2 -11 466.35 65.39
 6 -2 11 448.46 44.9
 -7 2 -11 90.09 33.9
 -7 2 -11 85.29 30.7
 7 -2 11 88.09 12.2
 -8 2 -11 50.39 31.9
 -8 2 -11 53.39 27.5
 -8 2 -11 63.89 11.7
 8 -2 11 127.99 35.3
 8 -2 11 52.59 11.1
 -9 2 -11 -3.4 31.2
 -9 2 -11 1.8 9
 -9 2 -11 9 24.9
 9 -2 11 3.2 21.9
 9 -2 11 8.5 7.5
 8 1 -11 192.18 25.7
 -8 -1 11 214.18 27.9
 -8 -1 11 225.98 25.3
 -8 -1 11 211.78 23.3
 7 1 -11 339.57 38.5
 -7 -1 11 371.96 36.7
 -7 -1 11 339.07 40.1
 -7 -1 11 397.66 38.1
 6 1 -11 1381.26 137.49
 -6 -1 11 1510.75 136.99
 -6 -1 11 1264.07 138.69
 -6 -1 11 1507.65 136.29
 5 1 -11 156.38 18.4
 -5 -1 11 167.18 17.1
 -5 -1 11 147.49 17.7
 4 1 -11 2059.29 200.78
 -4 -1 11 2114.39 198.78
 -4 -1 11 2152.48 200.48
 -4 -1 11 2019.8 199.78
 3 1 -11 86.09 10.4
 -3 -1 11 73.09 10
 -3 -1 11 85.49 8.9
 -3 -1 11 82.19 16.6
 -3 -1 11 92.39 9.6
 -2 -1 11 128.99 19.4
 -2 -1 11 100.59 12.1
 -2 -1 11 130.19 20
 -2 -1 11 123.49 11.7
 -2 -1 11 91.59 11.4
 -1 -1 11 59.49 12.8
 -1 -1 11 68.99 14.8
 -1 -1 11 57.89 7.1
 0 1 -11 496.05 58.49
 0 -1 11 492.85 58.39
 0 -1 11 541.25 50.99
 0 -1 11 597.34 62.99
 -1 1 -11 818.22 87.69
 1 -1 11 817.42 88.19
 -2 1 -11 845.42 94.09
 -2 1 -11 791.62 87.49
 2 -1 11 769.42 76.39
 -3 1 -11 1421.06 146.39
 -3 1 -11 1383.56 149.69
 3 -1 11 1353.56 132.59
 -4 1 -11 163.08 29.9
 -4 1 -11 125.49 29
 4 -1 11 160.38 16.3
 -5 1 -11 995.3 126.59
 -5 1 -11 1087.19 127.99
 5 -1 11 1313.57 111.39
 -6 1 -11 17.2 4.4
 -6 1 -11 14.6 13.8
 -6 1 -11 5.7 14.6
 6 -1 11 13.8 3.9
 6 -1 11 31.2 19.7
 -7 1 -11 384.36 59.19
 -7 1 -11 344.77 61.89
 7 -1 11 453.15 42
 -8 1 -11 32.2 21.8
 -8 1 -11 38.6 30.2
 -8 1 -11 70.29 11.5
 8 -1 11 107.29 33.7
 8 -1 11 41.1 9.2
 -9 1 -11 0.4 7.5
 -9 1 -11 3.9 22.8
 -9 1 -11 -6.1 29.6
 9 -1 11 2.9 19.1
 9 -1 11 2.3 7.3
 8 0 -11 316.67 40.8
 -8 0 11 423.76 39.6
 -8 0 11 395.46 46.4
 7 0 -11 333.37 35.4
 -7 0 11 366.26 34
 -7 0 11 341.47 35.2
 -7 0 11 288.77 38.4
 6 0 -11 1012.4 101.69
 -6 0 11 1082.69 100.69
 -6 0 11 970.8 105.19
 -6 0 11 1093.89 101.79
 5 0 -11 1128.59 103.59
 -5 0 11 1032.2 106.99
 -5 0 11 1010.9 106.89
 4 0 -11 1095.49 114.39
 -4 0 11 1172.28 114.59
 -4 0 11 1272.87 113.89
 3 0 -11 1113.29 109.59
 -3 0 11 1122.09 107.89
 -3 0 11 1093.39 116.79
 -3 0 11 1189.08 107.19
 -3 0 11 1082.99 108.69
 2 0 -11 632.34 58.09
 2 0 -11 538.45 58.29
 -2 0 11 590.64 56.89
 -2 0 11 591.04 56.79
 -2 0 11 594.24 57.79
 1 0 -11 16.7 3.8
 -1 0 11 6.3 2.3
 -1 0 11 8.5 1.7
 -1 0 11 12.8 7.2
 0 0 -11 22.2 9.1
 0 0 -11 35.7 4.4
 0 0 11 28.8 10
 0 0 11 30.2 3.7
 0 0 11 36.4 12.1
 0 0 11 21.5 2.9
 -1 0 -11 1386.06 132.79
 -1 0 -11 1423.06 142.99
 1 0 11 1337.37 132.59
 1 0 11 1230.08 132.39
 1 0 11 1409.16 142.89
 1 0 11 1650.93 146.89
 -2 0 -11 8.1 2
 -2 0 -11 35.6 13.5
 2 0 11 21.3 12.3
 2 0 11 11 10.2
 2 0 11 13.5 2.7
 -3 0 -11 1788.32 186.88
 -3 0 -11 1794.72 172.28
 3 0 11 1830.72 172.78
 -4 0 -11 1109.49 101.59
 -4 0 -11 911.01 115.29
 4 0 11 1103.49 101.79
 -5 0 -11 307.57 51.19
 -5 0 -11 478.25 39.1
 5 0 11 354.66 39
 -6 0 -11 1245.98 115.59
 -6 0 -11 1275.67 115.49
 6 0 11 1051.49 115.69
 -7 0 -11 7 4.7
 -7 0 -11 14 16.9
 -7 0 -11 7.4 4
 7 0 11 -0.2 4.2
 7 0 11 18.7 20
 -8 0 -11 287.17 26.2
 -8 0 -11 155.08 40
 -8 0 -11 149.88 48.7
 -8 0 -11 262.27 25.8
 8 0 11 246.18 24.8
 8 0 11 207.28 26.1
 -9 0 -11 18.3 20
 -9 0 -11 12.3 7.8
 -9 0 -11 -3.8 29.2
 -9 0 -11 16.4 7.5
 9 0 11 9.3 5.8
 9 0 11 37.6 22.4
 8 -1 -11 9.3 7.3
 -8 1 11 2.7 11
 -8 1 11 12.8 5
 -8 1 11 7.4 7.3
 7 -1 -11 1034.7 105.89
 -7 1 11 1020.6 111.69
 -7 1 11 1115.19 104.89
 -7 1 11 1152.98 106.39
 6 -1 -11 39.2 7.2
 -6 1 11 26.1 5.4
 -6 1 11 28.1 10.6
 -6 1 11 17.3 5.7
 5 -1 -11 1182.18 119.49
 5 -1 -11 1121.59 117.69
 -5 1 11 1354.06 118.89
 -5 1 11 1335.47 117.29
 -5 1 11 1095.59 122.49
 4 -1 -11 408.76 47.1
 4 -1 -11 464.25 45.9
 -4 1 11 477.75 45.4
 -4 1 11 489.15 46.7
 3 -1 -11 888.31 87.99
 3 -1 -11 806.02 86.39
 -3 1 11 974.4 87.39
 -3 1 11 870.91 86.09
 -3 1 11 969.3 96.69
 2 -1 -11 55.69 7.8
 2 -1 -11 64.09 6.5
 -2 1 11 56.49 5.9
 -2 1 11 58.19 7.3
 -2 1 11 53.69 6
 -2 1 11 39.6 12.7
 1 -1 -11 49.3 6.8
 -1 1 11 53.09 6.4
 -1 1 11 50.39 12.6
 -1 1 11 49.8 5.1
 0 -1 -11 3.7 2
 0 -1 -11 7.3 6.5
 0 1 11 5.7 1.8
 0 1 11 4.3 5.1
 -1 -1 -11 68.39 15.8
 1 1 11 63.79 6.6
 1 1 11 84.09 16.6
 1 1 11 64.39 7.4
 -2 -1 -11 1913.51 185.48
 -2 -1 -11 1929.11 184.88
 -2 -1 -11 1959.5 198.28
 2 1 11 1666.63 184.98
 2 1 11 2327.17 201.08
 -3 -1 -11 83.39 21.6
 -3 -1 -11 92.79 10.4
 -3 -1 -11 104.89 10.3
 3 1 11 91.99 10.5
 -4 -1 -11 2562.34 286.27
 -4 -1 -11 3261.77 270.97
 4 1 11 2641.04 271.07
 -5 -1 -11 584.04 86.59
 -5 -1 -11 828.42 71.89
 5 1 11 749.92 72.19
 -6 -1 -11 1033.6 91.99
 6 1 11 847.12 92.19
 -7 -1 -11 248.68 23.9
 -7 -1 -11 229.38 23.7
 7 1 11 178.78 23.9
 7 1 11 209.48 23.3
 -8 -1 -11 99.99 13.4
 -8 -1 -11 58.29 30.2
 -8 -1 -11 85.09 12.4
 8 1 11 89.69 13.9
 8 1 11 82.79 11.9
 -9 -1 -11 16.5 9.2
 -9 -1 -11 0.3 26.9
 -9 -1 -11 9.2 7.7
 9 1 11 24.8 12.1
 9 1 11 16.6 6.4
 9 1 11 9.7 18.6
 8 -2 -11 334.77 37.8
 -8 2 11 334.67 47.1
 -8 2 11 364.86 36.6
 -8 2 11 371.26 38.3
 7 -2 -11 315.07 39.2
 -7 2 11 400.86 40.3
 -7 2 11 411.96 49.2
 -7 2 11 403.16 38.8
 6 -2 -11 1283.77 129.69
 6 -2 -11 1290.57 131.39
 -6 2 11 1426.96 130.59
 -6 2 11 1454.75 129.19
 -6 2 11 1225.28 136.59
 5 -2 -11 183.58 18.8
 5 -2 -11 154.58 20.5
 -5 2 11 155.98 24.7
 -5 2 11 178.18 19.6
 -5 2 11 178.08 18.2
 4 -2 -11 1179.28 108.79
 4 -2 -11 1055.79 110.19
 -4 2 11 1113.49 109.59
 -4 2 11 1141.19 108.39
 3 -2 -11 86.59 9.5
 3 -2 -11 88.39 11.3
 -3 2 11 84.39 9.2
 -3 2 11 90.09 10.7
 -3 2 11 75.59 17.1
 2 -2 -11 303.77 33.9
 2 -2 -11 333.77 32.5
 -2 2 11 347.87 42.1
 -2 2 11 323.37 33.6
 -2 2 11 347.47 32.3
 1 -2 -11 212.28 21.4
 -1 2 11 225.38 20.9
 -1 2 11 181.48 19.8
 -1 2 11 197.78 28.3
 0 -2 -11 0.9 1.8
 0 -2 -11 7.1 6.9
 0 2 11 7.7 2.1
 0 2 11 1.7 5
 0 2 11 4.1 2.1
 -1 -2 -11 211.78 30.4
 -1 -2 -11 192.88 20.2
 -1 -2 -11 191.88 18.9
 1 2 11 212.58 29.8
 1 2 11 183.58 19.8
 1 2 11 198.98 20
 -2 -2 -11 62.29 6.3
 -2 -2 -11 74.99 18.2
 -2 -2 -11 50.29 7.1
 2 2 11 55.19 6.4
 2 2 11 65.49 17.4
 2 2 11 52.79 7
 -3 -2 -11 2508.25 248.88
 -3 -2 -11 2488.55 231.88
 -3 -2 -11 2491.15 232.58
 3 2 11 2352.36 232.48
 3 2 11 2321.07 231.98
 -4 -2 -11 8.1 10.6
 -4 -2 -11 3.7 2.3
 4 2 11 4.3 2.7
 4 2 11 3.5 2.5
 4 2 11 7 16.5
 4 2 11 4.6 9.6
 -5 -2 -11 3158.48 276.17
 5 2 11 2933.71 276.37
 5 2 11 2563.04 276.27
 -6 -2 -11 41.5 7.4
 -6 -2 -11 39.3 21.3
 6 2 11 101.59 28.8
 6 2 11 50.29 7.8
 6 2 11 40.7 8.2
 -7 -2 -11 743.63 66.09
 7 2 11 531.95 65.99
 7 2 11 711.13 65.79
 -8 -2 -11 10.6 5.4
 -8 -2 -11 15.2 6.4
 -8 -2 -11 7.6 20.5
 8 2 11 9.8 5.2
 8 2 11 17.6 16.8
 8 2 11 9.8 7.2
 -9 -2 -11 25.5 8
 -9 -2 -11 24.3 30.2
 -9 -2 -11 29.3 9.3
 9 2 11 31.5 7.5
 8 -3 -11 348.77 37.8
 -8 3 11 343.37 38.3
 -8 3 11 357.26 49.7
 7 -3 -11 184.58 24.5
 7 -3 -11 218.78 22.4
 -7 3 11 148.39 30.5
 -7 3 11 219.28 23.4
 6 -3 -11 760.12 79.09
 6 -3 -11 798.72 81.29
 -6 3 11 757.32 88.19
 -6 3 11 920.51 80.59
 5 -3 -11 974.6 111.39
 5 -3 -11 1117.39 113.59
 -5 3 11 1219.28 121.29
 -5 3 11 1346.37 113.29
 4 -3 -11 277.97 30.3
 4 -3 -11 300.17 32.4
 -4 3 11 280.07 37.9
 -4 3 11 336.27 31.9
 -4 3 11 336.17 42.3
 3 -3 -11 1411.96 141.89
 3 -3 -11 1416.76 140.09
 -3 3 11 1430.86 150.98
 -3 3 11 1436.06 139.49
 -3 3 11 1636.04 141.79
 2 -3 -11 15.9 4.2
 2 -3 -11 14.9 2.9
 -2 3 11 16 2.8
 -2 3 11 12.6 8.8
 -2 3 11 20.3 4.8
 1 -3 -11 323.17 30.7
 1 -3 -11 296.37 28.7
 -1 3 11 307.77 38.9
 -1 3 11 273.47 29.9
 -1 3 11 290.67 29.2
 0 -3 -11 15.5 9.7
 0 -3 -11 18.9 4.2
 0 -3 -11 14.9 2.3
 0 3 11 10.7 2.6
 0 3 11 24.1 10.3
 0 3 11 14.1 3.5
 -1 -3 -11 540.05 49.4
 -1 -3 -11 520.95 61.59
 -1 -3 -11 451.65 50.39
 1 3 11 570.64 61.59
 1 3 11 485.25 49.99
 -2 -3 -11 583.84 68.29
 -2 -3 -11 598.84 54.79
 -2 -3 -11 516.45 54.99
 2 3 11 635.14 68.79
 2 3 11 491.85 54.59
 -3 -3 -11 872.01 81.99
 -3 -3 -11 785.92 82.59
 -3 -3 -11 930.41 99.79
 3 3 11 837.22 81.89
 3 3 11 835.02 82.49
 -4 -3 -11 1840.42 205.08
 -4 -3 -11 2080.79 187.48
 4 3 11 1926.31 187.78
 4 3 11 1943.61 187.48
 -5 -3 -11 354.46 34.2
 5 3 11 311.57 34.3
 5 3 11 342.07 34.5
 -6 -3 -11 1237.68 108.09
 6 3 11 1091.79 107.99
 6 3 11 994.2 108.19
 -7 -3 -11 17.4 19.1
 -7 -3 -11 18.8 5.7
 7 3 11 5.6 4.6
 7 3 11 10.9 4.7
 7 3 11 26.3 18
 -8 -3 -11 393.06 36.3
 8 3 11 346.37 35.7
 8 3 11 269.37 36.7
 -9 -3 -11 18.8 8.5
 -9 -3 -11 9.8 6.8
 -9 -3 -11 17.5 30.5
 9 3 11 22.7 7.1
 9 3 11 17.1 18.5
 9 3 11 21.3 9.9
 8 -4 -11 1.7 9.7
 8 -4 -11 13 7.5
 -8 4 11 0.6 8.3
 -8 4 11 10.6 16.3
 7 -4 -11 604.84 60.29
 7 -4 -11 531.35 56.89
 -7 4 11 566.84 70.29
 6 -4 -11 117.79 18.3
 6 -4 -11 131.89 15.8
 -6 4 11 121.09 26.1
 -6 4 11 155.58 17.5
 5 -4 -11 1671.03 155.48
 5 -4 -11 1463.85 152.98
 -5 4 11 1462.05 163.18
 -5 4 11 1804.12 154.98
 4 -4 -11 796.22 84.49
 4 -4 -11 839.72 82.59
 -4 4 11 900.41 84.29
 -4 4 11 944.61 117.19
 -4 4 11 822.02 94.49
 3 -4 -11 440.56 44.7
 3 -4 -11 414.16 41.8
 3 -4 -11 416.96 42.4
 -3 4 11 504.05 44.3
 -3 4 11 432.66 42.1
 -3 4 11 458.65 54.69
 -3 4 11 396.56 50.89
 2 -4 -11 1013.4 102.59
 2 -4 -11 1006.3 100.69
 2 -4 -11 1056.09 100.59
 -2 4 11 1080.39 100.89
 -2 4 11 1120.89 102.29
 -2 4 11 1019.6 111.79
 1 -4 -11 30.6 6.2
 1 -4 -11 36.5 4.5
 -1 4 11 29.6 4.8
 -1 4 11 32.7 5.9
 -1 4 11 34.3 12.7
 0 -4 -11 8.5 2.3
 0 -4 -11 4.9 3.1
 0 -4 -11 17 10.1
 0 -4 -11 16.4 3
 0 4 11 5 2.9
 0 4 11 8 2.7
 0 4 11 10.2 7.6
 -1 -4 -11 4.2 7.3
 -1 -4 -11 2.7 2.7
 -1 -4 -11 0.7 1.7
 -1 -4 -11 0.9 1.5
 1 4 11 1.5 1.7
 1 4 11 1 6.7
 -2 -4 -11 1084.79 118.19
 -2 -4 -11 1231.68 131.99
 -2 -4 -11 1414.66 117.69
 2 4 11 1139.69 117.79
 -3 -4 -11 100.49 25.4
 -3 -4 -11 115.49 12.6
 -3 -4 -11 116.39 13.8
 3 4 11 169.48 33.4
 3 4 11 95.39 12.7
 -4 -4 -11 1849.81 152.68
 -4 -4 -11 1415.86 169.68
 4 4 11 1475.05 152.48
 4 4 11 1552.44 152.28
 -5 -4 -11 540.85 47.9
 5 4 11 430.16 47.7
 5 4 11 454.75 47.8
 -6 -4 -11 503.85 43.8
 6 4 11 377.36 43.2
 6 4 11 396.66 43.8
 -7 -4 -11 720.33 65.09
 7 4 11 542.65 65.29
 7 4 11 679.43 65.09
 -8 -4 -11 100.99 13.6
 -8 -4 -11 44.5 29.6
 8 4 11 77.49 15.9
 8 4 11 125.39 28.9
 8 4 11 89.79 13.6
 -9 -4 -11 51.79 34.9
 -9 -4 -11 123.19 15.9
 9 4 11 103.29 16.2
 9 4 11 85.99 18
 7 -5 -11 85.49 16.8
 7 -5 -11 83.79 13.1
 -7 5 11 61.79 23.3
 -7 5 11 110.19 16.6
 6 -5 -11 1127.79 106.19
 6 -5 -11 1058.99 103.59
 -6 5 11 1058.89 119.29
 -6 5 11 1171.58 105.49
 -6 5 11 900.91 115.79
 5 -5 -11 22.3 7.2
 5 -5 -11 18.5 4
 5 -5 -11 30.1 5.6
 -5 5 11 16.2 11.6
 -5 5 11 25.4 16.6
 -5 5 11 12.6 5.8
 4 -5 -11 2550.64 238.08
 4 -5 -11 2458.75 236.98
 4 -5 -11 2552.64 240.28
 -4 5 11 2318.87 249.28
 -4 5 11 2523.95 252.27
 -4 5 11 2203.98 237.18
 -4 5 11 2858.71 240.08
 3 -5 -11 533.15 50.59
 3 -5 -11 533.65 49.8
 -3 5 11 439.76 49.99
 -3 5 11 545.85 52.19
 -3 5 11 524.85 63.39
 -3 5 11 525.55 61.19
 2 -5 -11 607.84 56.89
 2 -5 -11 584.14 57.09
 2 -5 -11 557.24 58.79
 -2 5 11 553.14 66.49
 -2 5 11 568.34 57.19
 -2 5 11 628.54 58.69
 -2 5 11 599.04 69.49
 1 -5 -11 69.29 7.7
 1 -5 -11 49.7 9.1
 -1 5 11 62.79 9.3
 -1 5 11 72.19 18
 -1 5 11 61.39 8
 0 -5 -11 88.79 10.4
 0 -5 -11 83.89 20
 0 -5 -11 112.79 12.2
 0 5 11 88.59 20.5
 0 5 11 81.79 10.7
 0 5 11 102.59 11.9
 -1 -5 -11 140.89 18
 -1 -5 -11 157.38 17
 -1 -5 -11 162.58 28.3
 -1 -5 -11 175.18 17.1
 1 5 11 179.98 29.5
 1 5 11 149.39 17.3
 -2 -5 -11 74.59 21.9
 -2 -5 -11 85.09 11.9
 -2 -5 -11 96.99 10.9
 -2 -5 -11 96.79 10.9
 2 5 11 89.99 11.3
 2 5 11 103.89 25.1
 -3 -5 -11 803.12 71.29
 -3 -5 -11 812.82 71.39
 -3 -5 -11 630.34 72.09
 -3 -5 -11 731.03 87.89
 3 5 11 644.14 71.29
 -4 -5 -11 3.1 3
 -4 -5 -11 6.2 12.5
 -4 -5 -11 -0.8 4.9
 4 5 11 6 20.9
 4 5 11 3.9 3.7
 -5 -5 -11 1027.9 131.59
 5 5 11 1254.57 113.69
 5 5 11 1184.98 113.39
 -6 -5 -11 191.58 19.7
 -6 -5 -11 122.49 36.3
 6 5 11 338.47 74.89
 6 5 11 149.49 19.8
 6 5 11 161.18 19.5
 7 5 11 316.97 34.8
 7 5 11 330.27 35.8
 -8 -5 -11 198.78 21.3
 -8 -5 -11 80.29 46.6
 8 5 11 136.39 21.5
 7 -6 -11 137.89 18.7
 7 -6 -11 128.09 22.6
 -7 6 11 151.28 39
 -7 6 11 120.89 37.6
 -7 6 11 154.28 22.1
 6 -6 -11 308.07 34.7
 6 -6 -11 286.07 31
 -6 6 11 310.27 37.1
 -6 6 11 268.17 47.6
 -6 6 11 276.47 46.9
 5 -6 -11 961.9 102.09
 5 -6 -11 1016.3 98.29
 5 -6 -11 993.7 99.99
 -5 6 11 1093.39 117.09
 -5 6 11 1199.98 102.39
 -5 6 11 908.21 113.79
 4 -6 -11 160.08 20.3
 4 -6 -11 166.48 16.5
 4 -6 -11 175.48 18
 -4 6 11 177.48 20.1
 -4 6 11 160.28 29.8
 -4 6 11 137.79 16.8
 -4 6 11 135.99 31.1
 3 -6 -11 1736.93 174.68
 3 -6 -11 1802.12 172.88
 3 -6 -11 1891.71 172.18
 -3 6 11 1647.94 184.48
 -3 6 11 1737.43 172.58
 -3 6 11 1964.8 174.58
 2 -6 -11 15.8 4.2
 2 -6 -11 14.7 3.5
 2 -6 -11 17.5 5.8
 -2 6 11 11.9 5.4
 -2 6 11 22.2 13.6
 -2 6 11 9.3 3.4
 -2 6 11 10.8 10.2
 1 -6 -11 900.61 83.59
 1 -6 -11 833.32 85.19
 -1 6 11 758.42 97.49
 -1 6 11 887.51 96.59
 -1 6 11 825.02 83.99
 -1 6 11 958.8 85.59
 0 -6 -11 1.2 3.9
 0 -6 -11 2.9 2.4
 0 6 11 4.7 3
 0 6 11 10.4 10.5
 -1 -6 -11 27.6 5.6
 -1 -6 -11 28.6 5.7
 -1 -6 -11 44.4 16.9
 -1 -6 -11 34.3 8.9
 1 6 11 29.2 15.7
 1 6 11 25.9 5.9
 -2 -6 -11 124.49 13.8
 -2 -6 -11 127.09 13.9
 -2 -6 -11 89.79 14.5
 -2 -6 -11 126.09 26.7
 2 6 11 124.99 30.7
 2 6 11 112.29 14.1
 -3 -6 -11 526.35 70.89
 -3 -6 -11 507.05 57.09
 -3 -6 -11 597.54 55.99
 -3 -6 -11 595.74 55.79
 -4 -6 -11 1101.79 124.89
 -4 -6 -11 1179.18 141.69
 -4 -6 -11 1445.46 123.89
 -4 -6 -11 1439.66 124.29
 4 6 11 1175.98 124.09
 -5 -6 -11 47.6 8.2
 -5 -6 -11 26.2 20.6
 -5 -6 -11 18.8 8.1
 5 6 11 24.9 7
 5 6 11 65.09 24.8
 5 6 11 99.89 45.5
 -6 -6 -11 940.81 89.09
 6 6 11 852.51 88.99
 -7 -6 -11 -3.2 22.3
 -7 -6 -11 18 6.9
 7 6 11 14.1 19.5
 7 6 11 5.1 8.3
 -8 -6 -11 229.88 26.7
 8 6 11 242.78 27.4
 8 6 11 185.68 28.3
 6 -7 -11 39.6 13.6
 6 -7 -11 49.3 9.9
 -6 7 11 34 11.7
 -6 7 11 33.9 21.9
 5 -7 -11 882.51 88.29
 5 -7 -11 928.51 86.59
 5 -7 -11 853.01 90.59
 -5 7 11 915.61 106.39
 -5 7 11 854.81 107.39
 -5 7 11 922.31 91.39
 4 -7 -11 506.65 51.79
 4 -7 -11 479.25 47.9
 4 -7 -11 504.25 49.2
 -4 7 11 542.35 51.39
 -4 7 11 450.55 63.49
 -4 7 11 435.86 48.4
 -4 7 11 531.75 66.99
 3 -7 -11 541.95 48.2
 3 -7 -11 456.65 50.59
 3 -7 -11 472.35 48.7
 -3 7 11 502.25 63.59
 -3 7 11 418.36 48.3
 -3 7 11 486.25 63.69
 -3 7 11 543.55 50.99
 2 -7 -11 910.01 87.79
 2 -7 -11 856.31 89.89
 -2 7 11 889.91 88.39
 -2 7 11 1041 90.49
 -2 7 11 792.22 99.89
 -2 7 11 953.2 103.09
 1 -7 -11 5.4 3.4
 1 -7 -11 1.5 4.4
 -1 7 11 0.5 8.5
 -1 7 11 7.3 12.7
 -1 7 11 9.1 6.7
 -1 7 11 8.2 4.9
 0 -7 -11 36.7 6.3
 0 -7 -11 33.4 7.8
 0 7 11 21.7 5.9
 0 7 11 34 16.4
 0 7 11 35 14.2
 -1 -7 -11 32.1 6.3
 -1 -7 -11 15.6 12.1
 -1 -7 -11 23.1 5.4
 -1 -7 -11 23.9 7.7
 1 7 11 34.9 18.2
 1 7 11 27.3 13
 1 7 11 21.6 5.7
 -2 -7 -11 267.57 30.8
 -2 -7 -11 292.57 29
 -2 -7 -11 282.17 29.1
 -2 -7 -11 222.18 39.9
 2 7 11 399.66 55.59
 2 7 11 290.87 38.4
 2 7 11 242.28 29.4
 -3 -7 -11 252.67 42.3
 -3 -7 -11 269.17 26.8
 -3 -7 -11 219.68 28.5
 -3 -7 -11 274.37 28.5
 3 7 11 232.48 27.4
 -4 -7 -11 627.54 56.09
 -4 -7 -11 495.55 72.39
 -4 -7 -11 630.24 56.59
 -4 -7 -11 470.35 57.49
 4 7 11 532.85 56.79
 -5 -7 -11 849.02 70.19
 -5 -7 -11 570.44 87.29
 -5 -7 -11 607.64 71.39
 5 7 11 755.22 71.09
 -6 -7 -11 255.37 24.9
 -6 -7 -11 142.89 43.3
 6 7 11 206.58 28.6
 6 7 11 179.08 26.2
 -7 -7 -11 229.38 53.69
 5 -8 -11 6.1 9.9
 5 -8 -11 5.5 6.6
 5 -8 -11 7.5 6.4
 -5 8 11 -7.7 17.8
 -5 8 11 4.3 21.8
 -5 8 11 -4.6 9.3
 4 -8 -11 785.92 82.49
 4 -8 -11 884.91 81.49
 4 -8 -11 752.22 86.59
 -4 8 11 915.61 102.59
 -4 8 11 763.02 82.19
 -4 8 11 968.6 85.69
 -4 8 11 801.42 101.19
 3 -8 -11 107.39 17
 3 -8 -11 114.69 13.3
 3 -8 -11 112.69 14.4
 -3 8 11 115.79 32.2
 -3 8 11 124.59 17
 -3 8 11 114.49 30.7
 -3 8 11 94.89 14.3
 2 -8 -11 265.77 28.1
 2 -8 -11 271.87 31
 -2 8 11 268.37 44.6
 -2 8 11 290.77 31.1
 -2 8 11 254.97 43.2
 -2 8 11 277.77 29.3
 1 -8 -11 361.36 32.6
 1 -8 -11 294.47 34.5
 -1 8 11 283.07 33.1
 -1 8 11 303.87 46.4
 -1 8 11 317.47 48.5
 0 -8 -11 18.9 7.8
 0 -8 -11 18.7 6
 0 -8 -11 22.9 5.6
 0 8 11 24.6 18
 0 8 11 38.5 7.4
 0 8 11 35.4 16.5
 -1 -8 -11 5.3 6.9
 -1 -8 -11 10 4.5
 -1 -8 -11 12.3 5.1
 1 8 11 7.9 10.6
 1 8 11 12 5.4
 1 8 11 2.8 18.2
 -2 -8 -11 10.4 4.2
 -2 -8 -11 8.8 11.9
 -2 -8 -11 6.4 4.9
 -2 -8 -11 2.6 6.7
 2 8 11 5.1 10.4
 2 8 11 3.1 5
 2 8 11 12.7 23.4
 -3 -8 -11 276.67 47.6
 -3 -8 -11 349.17 35.2
 -3 -8 -11 363.06 38.3
 -3 -8 -11 338.27 35.6
 3 8 11 309.07 36.3
 3 8 11 387.16 46
 -4 -8 -11 58.29 12.9
 -4 -8 -11 69.09 11.6
 -4 -8 -11 60.59 23.6
 -4 -8 -11 54.39 10.9
 4 8 11 105.29 46.7
 4 8 11 59.09 11.5
 4 8 11 52.89 18.6
 -5 -8 -11 611.34 52.69
 -5 -8 -11 576.44 53.09
 -5 -8 -11 424.56 54.09
 -5 -8 -11 430.16 68.89
 5 8 11 512.85 58.99
 5 8 11 478.95 53.19
 -6 -8 -11 212.98 54.79
 -6 -8 -11 334.07 35
 -6 -8 -11 252.97 43.2
 6 8 11 347.47 40.2
 6 8 11 353.76 40.9
 3 -9 -11 666.03 75.59
 3 -9 -11 820.22 72.79
 3 -9 -11 682.73 73.09
 -3 9 11 691.33 93.49
 -3 9 11 831.22 94.59
 -3 9 11 662.33 73.59
 -3 9 11 809.52 76.19
 2 -9 -11 77.09 11.2
 2 -9 -11 81.69 15.7
 -2 9 11 75.09 29.6
 -2 9 11 66.29 26.5
 -2 9 11 69.99 12.8
 1 -9 -11 305.47 29.9
 -1 9 11 309.17 51.39
 -1 9 11 251.37 45.7
 -1 9 11 251.07 30.9
 0 -9 -11 216.18 23.9
 0 -9 -11 227.68 24.8
 0 -9 -11 220.98 29.1
 0 9 11 207.28 38.8
 0 9 11 193.08 25.2
 0 9 11 240.68 45.4
 -1 -9 -11 5.7 12.6
 -1 -9 -11 7.9 4.7
 -1 -9 -11 14.3 6.2
 1 9 11 10 14.1
 1 9 11 1.1 6.2
 1 9 11 12.4 23.6
 -2 -9 -11 66.49 13.6
 -2 -9 -11 50.79 10.3
 -2 -9 -11 41.5 9.1
 2 9 11 67.49 36.1
 2 9 11 36.6 18.3
 -3 -9 -11 31.9 8.6
 -3 -9 -11 28.9 18.2
 -3 -9 -11 30.3 12.4
 -3 -9 -11 38 8.2
 3 9 11 35.6 10.5
 3 9 11 21.3 15.2
 3 9 11 82.79 44.6
 -4 -9 -11 437.76 43.7
 -4 -9 -11 326.87 43.4
 -4 -9 -11 321.17 54.49
 -4 -9 -11 460.75 41.7
 4 9 11 389.56 50.29
 4 9 11 365.56 42.4
 0 -10 -11 214.78 23.1
 0 -10 -11 192.58 23.9
 0 10 11 177.78 41.6
 0 10 11 182.38 25.4
 -1 -10 -11 0.7 7.5
 -1 -10 -11 12.3 7.8
 1 10 11 3.3 16.3
 1 10 11 -0.6 8.3
 1 10 11 -8.6 34.2
 -2 -8 12 317.07 31.2
 -2 -8 12 349.67 32.9
 -2 -8 12 234.58 30.9
 -2 -8 12 277.07 36.5
 1 8 -12 159.88 53.99
 -1 -8 12 113.59 16.1
 -1 -8 12 103.39 15
 -1 -8 12 96.79 22
 -1 -8 12 96.99 14.3
 0 8 -12 2.8 28.3
 0 -8 12 6.1 5.7
 0 -8 12 1.5 5.3
 0 -8 12 4.4 10.7
 -1 8 -12 38.9 29.9
 1 -8 12 20.3 14.3
 1 -8 12 24 7.2
 1 -8 12 19.8 5.9
 -2 8 -12 14.6 29.6
 2 -8 12 20.9 5.6
 2 -8 12 20.2 6.1
 2 -8 12 15.4 24.3
 -3 8 -12 200.98 61.69
 3 -8 12 243.18 40.9
 -4 -7 12 568.64 50.69
 -4 -7 12 456.75 48.9
 -4 -7 12 442.86 48
 -3 -7 12 477.95 53.39
 -3 -7 12 514.35 49.7
 -2 -7 12 1.9 4.7
 -2 -7 12 13.2 9.2
 -2 -7 12 1.2 4.2
 1 7 -12 218.48 50.59
 -1 -7 12 119.09 22.6
 -1 -7 12 131.89 16.5
 -1 -7 12 136.49 16.6
 -1 -7 12 164.18 17.9
 0 7 -12 5.9 21
 0 -7 12 8.3 4.7
 0 -7 12 13.5 10.5
 0 -7 12 8.3 4.7
 -1 7 -12 10.7 20.4
 1 -7 12 25 5.3
 1 -7 12 22.9 5.8
 1 -7 12 28.2 14
 -2 7 -12 7.1 19.9
 2 -7 12 18.6 4.5
 2 -7 12 20.8 14.2
 2 -7 12 20.6 6.1
 -3 7 -12 39.8 29.3
 3 -7 12 22.6 9.8
 3 -7 12 59.49 20.1
 -4 7 -12 277.17 66.79
 -4 7 -12 364.66 45
 4 -7 12 407.46 54.49
 4 -7 12 376.36 37.3
 4 -7 12 303.37 37.2
 -5 7 -12 54.19 33.9
 -5 7 -12 43.9 21.2
 5 -7 12 87.59 30
 5 -7 12 46 10
 5 -7 12 59.29 11.6
 -5 -6 12 752.42 74.99
 -5 -6 12 793.42 73.99
 -5 -6 12 722.73 81.09
 -4 -6 12 274.47 27.2
 -4 -6 12 178.88 37.2
 -4 -6 12 242.58 27.3
 -4 -6 12 227.58 30.3
 -4 -6 12 286.27 25.6
 -4 -6 12 233.18 25.9
 -3 -6 12 467.05 51.39
 -3 -6 12 412.76 55.79
 -3 -6 12 533.95 53.99
 -3 -6 12 511.55 49.8
 -3 -6 12 558.44 49.4
 -2 -6 12 361.56 40.8
 -2 -6 12 326.57 34.6
 -2 -6 12 311.07 34
 1 6 -12 56.99 27.6
 -1 -6 12 27.3 12.2
 -1 -6 12 41.7 7.7
 -1 -6 12 35.9 7
 0 -6 12 57.59 8
 0 -6 12 44.2 8.1
 -1 6 -12 -3.2 16.1
 1 -6 12 2.3 9.4
 1 -6 12 5.3 2.9
 1 -6 12 1.6 3.2
 -2 6 -12 134.99 39.3
 2 -6 12 170.88 18.7
 2 -6 12 154.38 16.6
 2 -6 12 193.78 31.2
 -3 6 -12 16.9 19.5
 -3 6 -12 20.3 11.7
 3 -6 12 26.6 6.6
 3 -6 12 29.7 15.4
 -4 6 -12 413.26 54.29
 -4 6 -12 375.16 68.89
 4 -6 12 501.75 44.8
 4 -6 12 419.36 44
 -5 6 -12 376.26 72.19
 -5 6 -12 373.16 55.29
 5 -6 12 396.86 42.4
 5 -6 12 498.35 43.5
 -6 6 -12 144.99 37.7
 -6 6 -12 144.59 53.19
 6 -6 12 245.38 23.6
 6 -6 12 192.18 22.3
 -6 -5 12 424.26 51.69
 -6 -5 12 333.17 36.4
 -5 -5 12 2 3
 -5 -5 12 9.3 4.6
 -5 -5 12 4.9 5.5
 -5 -5 12 -2.4 10.9
 -4 -5 12 1244.88 118.69
 -4 -5 12 1194.18 120.69
 -4 -5 12 1203.68 117.99
 -4 -5 12 1358.66 119.49
 -4 -5 12 1140.29 124.49
 -3 -5 12 284.27 26.8
 -3 -5 12 230.58 31.4
 -3 -5 12 213.58 26.7
 -3 -5 12 275.37 27.3
 -3 -5 12 302.67 32.8
 -2 -5 12 908.51 86.19
 -2 -5 12 774.12 78.29
 -2 -5 12 729.33 77.89
 -1 -5 12 272.07 37.1
 -1 -5 12 273.57 28.9
 -1 -5 12 295.87 33.5
 0 5 -12 246.18 44.8
 0 -5 12 209.48 27.5
 0 -5 12 161.28 20.2
 0 -5 12 184.28 29.7
 -1 5 -12 4.3 15.5
 1 -5 12 4.1 3.1
 1 -5 12 5.3 2.6
 1 -5 12 2.2 7.7
 -2 5 -12 84.19 30.8
 -2 5 -12 92.29 17.9
 2 -5 12 103.79 23.6
 2 -5 12 86.99 11.5
 -3 5 -12 456.95 56.89
 -3 5 -12 412.56 68.49
 3 -5 12 535.45 48.3
 -4 5 -12 -0.3 13.5
 -4 5 -12 7.8 11.2
 4 -5 12 2.3 3.9
 4 -5 12 19.2 14.1
 4 -5 12 7.5 3.2
 -5 5 -12 809.32 105.39
 -5 5 -12 896.61 119.29
 5 -5 12 1127.49 93.89
 -6 5 -12 121.39 35.4
 -6 5 -12 112.99 43.4
 6 -5 12 156.58 18.4
 6 -5 12 197.38 19.9
 -7 5 -12 273.37 67.99
 7 -5 12 365.26 39
 7 -5 12 425.36 40.1
 -7 -4 12 54.29 9.7
 -7 -4 12 45.6 9.5
 -7 -4 12 41.8 6.6
 -6 -4 12 166.98 18.7
 -6 -4 12 148.49 17.2
 -6 -4 12 132.89 15.2
 -5 -4 12 736.03 77.29
 -5 -4 12 664.03 65.89
 -5 -4 12 623.74 64.79
 -5 -4 12 666.23 66.59
 -4 -4 12 78.49 9.3
 -4 -4 12 63.19 13
 -4 -4 12 60.79 8.3
 -4 -4 12 53.49 16.2
 -4 -4 12 80.99 10.3
 -3 -4 12 1567.24 148.49
 -3 -4 12 1542.65 154.68
 -3 -4 12 1484.55 147.69
 -3 -4 12 1745.63 155.58
 -3 -4 12 1370.36 147.99
 -2 -4 12 61.19 7.8
 -2 -4 12 62.59 7.7
 -2 -4 12 57.89 7.8
 -2 -4 12 46.7 12.4
 -2 -4 12 50.89 14.5
 -1 -4 12 1295.27 118.59
 -1 -4 12 1305.57 128.79
 -1 -4 12 1179.28 118.39
 -1 -4 12 1212.78 117.99
 -1 -4 12 1158.68 123.49
 0 4 -12 180.68 36.2
 0 -4 12 121.99 13.9
 0 -4 12 132.39 15
 0 -4 12 146.29 25
 0 -4 12 141.79 25.1
 -1 4 -12 46.9 12.5
 -1 4 -12 37.2 18.3
 1 -4 12 42.9 7.2
 1 -4 12 74.89 22.1
 1 -4 12 53.39 17.9
 1 -4 12 50.89 5.8
 -2 4 -12 97.39 19.3
 -2 4 -12 77.49 28.3
 2 -4 12 119.09 29
 2 -4 12 103.49 23.6
 2 -4 12 73.09 11.1
 -3 4 -12 287.47 52.39
 -3 4 -12 366.36 45.9
 3 -4 12 342.67 34.9
 -4 4 -12 864.71 96.59
 -4 4 -12 853.31 106.69
 4 -4 12 853.01 83.59
 -5 4 -12 143.69 33.3
 -5 4 -12 156.08 40.4
 5 -4 12 207.78 21.3
 5 -4 12 265.07 23.1
 -6 4 -12 857.31 110.29
 -6 4 -12 725.43 99.29
 6 -4 12 928.81 83.19
 -7 4 -12 3.6 19.8
 -7 4 -12 6.3 20.8
 7 -4 12 17.7 18.8
 7 -4 12 8.1 6
 7 -4 12 3.3 5.1
 -8 4 -12 248.78 62.49
 -8 4 -12 177.58 57.69
 8 -4 12 351.76 31.9
 8 -4 12 258.87 30
 -7 -3 12 115.49 14.2
 -7 -3 12 101.99 16.8
 -6 -3 12 100.89 13.3
 -6 -3 12 108.99 11.6
 -6 -3 12 122.29 14.9
 -5 -3 12 403.26 40.8
 -5 -3 12 417.66 40.3
 -5 -3 12 381.06 39
 -4 -3 12 508.15 46.4
 -4 -3 12 524.05 47.8
 -4 -3 12 427.16 46.9
 -4 -3 12 482.35 56.19
 -4 -3 12 436.16 52.59
 -3 -3 12 737.03 73.59
 -3 -3 12 701.23 73.79
 -3 -3 12 836.12 73.39
 -3 -3 12 696.83 80.69
 -3 -3 12 808.82 81.69
 -2 -3 12 2130.49 219.88
 -2 -3 12 2407.76 213.38
 -2 -3 12 2190.68 213.48
 -2 -3 12 2098.19 222.08
 -2 -3 12 2312.87 213.48
 -1 -3 12 91.19 16.1
 -1 -3 12 82.99 19.2
 -1 -3 12 80.09 10
 -1 -3 12 98.89 10.2
 -1 -3 12 95.69 10.4
 0 -3 12 1040.7 110.39
 0 -3 12 1196.08 118.89
 0 -3 12 1134.39 111.29
 0 -3 12 1292.17 124.59
 -1 3 -12 22.8 16.7
 -1 3 -12 34 11.8
 1 -3 12 33.5 5.8
 1 -3 12 60.59 18.1
 1 -3 12 45.2 17.7
 -2 3 -12 44.4 20.7
 -2 3 -12 25.1 11
 2 -3 12 50.79 20.9
 2 -3 12 47.4 18.3
 -3 3 -12 206.78 32.1
 -3 3 -12 183.68 37.6
 3 -3 12 192.28 20.2
 -4 3 -12 503.55 69.29
 -4 3 -12 497.25 62.29
 4 -3 12 478.65 48.4
 -5 3 -12 394.46 62.69
 -5 3 -12 383.96 56.89
 5 -3 12 474.05 43.1
 -6 3 -12 299.07 55.29
 -6 3 -12 311.57 53.29
 6 -3 12 394.36 36
 -7 3 -12 602.54 53.29
 -7 3 -12 503.45 79.39
 7 -3 12 486.95 54.79
 -8 3 -12 42.3 8
 -8 3 -12 41.8 31.8
 -8 3 -12 23.8 29.3
 8 -3 12 108.49 38.5
 8 -3 12 31.3 12.1
 8 2 -12 5.6 9.4
 -8 -2 12 4 6.9
 -8 -2 12 -0.5 7.9
 7 2 -12 -0.3 6.6
 -7 -2 12 4.1 4.2
 -7 -2 12 3.2 6.1
 6 2 -12 727.53 73.99
 -6 -2 12 700.43 73.49
 -6 -2 12 813.32 73.09
 -6 -2 12 812.22 72.19
 -6 -2 12 648.94 76.29
 5 2 -12 104.09 14.2
 -5 -2 12 110.79 12.5
 -5 -2 12 87.49 18
 -5 -2 12 116.29 13.4
 -5 -2 12 108.09 11
 -4 -2 12 2297.97 220.58
 -4 -2 12 2307.17 230.58
 -4 -2 12 2354.46 219.78
 -4 -2 12 2157.98 227.38
 -4 -2 12 2395.56 221.18
 -3 -2 12 474.15 46.1
 -3 -2 12 451.75 45.6
 -3 -2 12 508.15 46.6
 -3 -2 12 441.56 53.79
 -3 -2 12 468.35 54.29
 -2 -2 12 2182.18 206.38
 -2 -2 12 2049.09 215.38
 -2 -2 12 2103.29 213.88
 -2 -2 12 2102.89 206.58
 -2 -2 12 2343.17 206.38
 -1 -2 12 628.44 68.39
 -1 -2 12 670.83 68.49
 -1 -2 12 747.93 76.29
 -1 -2 12 793.32 68.99
 -1 -2 12 733.13 79.49
 0 2 -12 258.47 30.5
 0 -2 12 182.98 22.2
 0 -2 12 211.48 21.6
 0 -2 12 218.58 29.8
 0 -2 12 248.08 34.1
 -1 2 -12 224.98 37.9
 -1 2 -12 158.58 26.4
 1 -2 12 191.98 29.5
 1 -2 12 227.98 33.3
 -2 2 -12 104.29 22
 -2 2 -12 121.09 28.8
 2 -2 12 157.68 28.7
 2 -2 12 148.59 30.7
 -3 2 -12 70.79 19.6
 -3 2 -12 80.49 23.7
 3 -2 12 86.09 9.4
 -4 2 -12 1.6 9
 -4 2 -12 1.2 9.5
 4 -2 12 1.8 2
 4 -2 12 9.1 21.7
 4 -2 12 2 12.3
 -5 2 -12 411.76 63.39
 -5 2 -12 382.16 59.59
 5 -2 12 533.65 45.8
 -6 2 -12 455.85 37.9
 -6 2 -12 317.17 55.89
 -6 2 -12 302.37 54.99
 6 -2 12 369.36 38.6
 -7 2 -12 506.05 75.79
 -7 2 -12 456.95 74.09
 7 -2 12 617.04 54.89
 -8 2 -12 443.16 77.29
 -8 2 -12 445.76 74.59
 8 -2 12 554.44 51.39
 -9 2 -12 48.3 35.6
 -9 2 -12 94.79 66.99
 -9 2 -12 107.39 15.9
 9 -2 12 80.59 15.4
 9 -2 12 143.69 58.09
 8 1 -12 46.6 11.4
 -8 -1 12 49.3 14.6
 -8 -1 12 35.4 7.4
 -8 -1 12 40.2 9.9
 7 1 -12 142.99 21.6
 -7 -1 12 197.88 21.4
 -7 -1 12 181.38 19.7
 -7 -1 12 183.98 23.8
 6 1 -12 78.09 12
 -6 -1 12 77.19 13.2
 -6 -1 12 77.59 9.9
 -6 -1 12 70.89 11.2
 5 1 -12 1646.34 159.18
 -5 -1 12 1611.74 158.58
 -5 -1 12 1666.93 157.88
 4 1 -12 83.09 11.6
 -4 -1 12 101.49 10.5
 -4 -1 12 94.49 11.3
 -4 -1 12 86.79 9.3
 -3 -1 12 2641.34 243.48
 -3 -1 12 2351.86 243.88
 -3 -1 12 2522.75 242.88
 -3 -1 12 2682.33 253.17
 -2 -1 12 15.6 8.1
 -2 -1 12 24.5 9.9
 -2 -1 12 13.5 2.8
 -2 -1 12 11.4 3.1
 -2 -1 12 17.4 3
 -1 -1 12 2189.88 204.98
 -1 -1 12 2028.6 204.48
 -1 -1 12 2290.97 215.88
 -1 -1 12 2088.49 212.68
 0 1 -12 37.6 11.3
 0 -1 12 30 4
 0 -1 12 36.5 11.1
 0 -1 12 25 10
 -1 1 -12 60.09 15
 1 -1 12 53.89 16.2
 1 -1 12 54.59 14.6
 -2 1 -12 2.7 9.5
 -2 1 -12 1.1 6.8
 2 -1 12 12.6 10.6
 2 -1 12 3.1 8.7
 2 -1 12 5 1.6
 -3 1 -12 84.29 21.3
 -3 1 -12 94.49 24.4
 3 -1 12 94.99 10.2
 -4 1 -12 304.57 48.9
 -4 1 -12 354.26 48.5
 4 -1 12 342.77 33.7
 -5 1 -12 4.9 12.3
 -5 1 -12 0.6 10.1
 -5 1 -12 2.9 2.5
 5 -1 12 14.5 3.6
 5 -1 12 18.6 26.4
 5 -1 12 14.5 13.6
 -6 1 -12 1319.07 127.19
 -7 1 -12 120.79 37.7
 -7 1 -12 125.99 35
 -7 1 -12 217.18 19.9
 7 -1 12 173.78 19.6
 -8 1 -12 647.34 92.49
 -8 1 -12 568.44 95.19
 8 -1 12 889.21 73.09
 -9 1 -12 141.39 58.39
 -9 1 -12 159.28 50.19
 -9 1 -12 281.17 28.7
 9 -1 12 238.78 27.3
 8 0 -12 2.9 7.2
 -8 0 12 3.3 6.7
 -8 0 12 2.8 9.8
 -8 0 12 0.2 4.4
 7 0 -12 76.29 11.8
 -7 0 12 52.19 10.5
 -7 0 12 62.39 13.9
 -7 0 12 57.79 8.9
 6 0 -12 227.38 22.3
 -6 0 12 234.18 22.1
 -6 0 12 182.68 20.1
 -6 0 12 158.18 24.5
 5 0 -12 767.12 78.89
 -5 0 12 813.32 78.99
 -5 0 12 822.62 77.89
 4 0 -12 1090.29 115.69
 -4 0 12 1320.37 115.19
 -4 0 12 1166.38 115.99
 3 0 -12 477.65 50.79
 3 0 -12 476.85 49.7
 -3 0 12 482.75 49.99
 -3 0 12 516.75 48.5
 -3 0 12 536.65 49.2
 -3 0 12 524.35 58.99
 2 0 -12 2060.69 197.68
 -2 0 12 2012.5 196.88
 -2 0 12 1899.41 195.88
 -2 0 12 2274.07 206.18
 1 0 -12 39.7 6.6
 -1 0 12 50.79 5.2
 -1 0 12 45.2 12.4
 -1 0 12 44.8 6
 0 0 -12 909.01 93.39
 0 0 -12 938.31 84.09
 0 0 12 1038.4 96.49
 0 0 12 880.31 92.79
 0 0 12 769.92 82.89
 0 0 12 772.02 83.39
 -1 0 -12 98.59 9.4
 -1 0 -12 68.09 16.9
 1 0 12 110.09 20.9
 1 0 12 80.99 8.7
 1 0 12 103.99 19.2
 1 0 12 79.79 8.9
 -2 0 -12 46 15.2
 -2 0 -12 52.99 6.2
 2 0 12 93.99 20.2
 2 0 12 73.19 18.9
 -3 0 -12 68.09 19.6
 -3 0 -12 68.49 8
 3 0 12 130.59 30.6
 3 0 12 137.99 26.1
 3 0 12 69.89 8.4
 -4 0 -12 349.27 54.89
 4 0 12 467.95 41.9
 -5 0 -12 637.64 90.19
 -5 0 -12 907.41 75.39
 5 0 12 734.03 75.39
 -6 0 -12 84.39 9.9
 -6 0 -12 35.3 20.8
 -6 0 -12 85.09 10.1
 -6 0 -12 52.39 21.9
 6 0 12 68.19 10.1
 6 0 12 166.98 34.9
 -7 0 -12 1614.74 150.58
 -7 0 -12 1703.13 150.48
 7 0 12 1343.87 150.78
 -8 0 -12 1.7 16.5
 -8 0 -12 -1.8 4.2
 -8 0 -12 -1.7 5.7
 -8 0 -12 3.3 21
 8 0 12 13.6 19.9
 8 0 12 10.1 6
 8 0 12 -3 3.7
 -9 0 -12 630.64 63.59
 -9 0 -12 702.03 63.89
 9 0 12 526.15 65.29
 9 0 12 623.04 62.59
 8 -1 -12 0.7 6
 -8 1 12 2.1 12.3
 -8 1 12 -1.6 4
 -8 1 12 -0.8 6.2
 7 -1 -12 3.9 5.2
 -7 1 12 7.5 5.2
 -7 1 12 6.8 8.3
 -7 1 12 2.4 3.5
 6 -1 -12 380.66 42.1
 -6 1 12 447.96 41.4
 -6 1 12 460.45 43.1
 -6 1 12 372.16 47.3
 5 -1 -12 24.4 7.2
 5 -1 -12 9.9 3.9
 -5 1 12 15.7 3.6
 -5 1 12 12.6 7.4
 -5 1 12 11.3 5.1
 4 -1 -12 982.7 96.39
 4 -1 -12 897.11 97.79
 -4 1 12 1023.2 95.89
 -4 1 12 1021.8 97.19
 -4 1 12 1037.8 107.79
 3 -1 -12 1238.48 131.29
 3 -1 -12 1352.46 129.99
 -3 1 12 1298.67 129.49
 -3 1 12 1419.36 130.79
 -3 1 12 1466.45 140.99
 2 -1 -12 1009.8 99.09
 2 -1 -12 1059.99 97.59
 -2 1 12 959.8 106.69
 -2 1 12 1076.09 98.59
 -2 1 12 980.1 97.29
 1 -1 -12 2503.45 247.98
 -1 1 12 2798.42 247.68
 -1 1 12 2462.05 256.17
 0 -1 -12 304.47 30.7
 0 -1 -12 309.27 39.8
 0 1 12 308.57 39.2
 0 1 12 302.97 30.3
 -1 -1 -12 1002.7 102.69
 -1 -1 -12 1140.99 114.69
 1 1 12 1050.89 102.99
 1 1 12 1101.99 113.69
 -2 -1 -12 14 10.1
 -2 -1 -12 16 3.6
 2 1 12 16.8 2.6
 2 1 12 10.5 10.1
 2 1 12 19 11.7
 -3 -1 -12 78.19 9.5
 -3 -1 -12 88.59 21.9
 -3 -1 -12 79.39 9.1
 3 1 12 137.59 29.4
 3 1 12 116.39 24.6
 3 1 12 84.29 9.5
 -4 -1 -12 275.17 46.7
 -4 -1 -12 374.56 32.8
 4 1 12 308.67 33
 -5 -1 -12 990 85.69
 -5 -1 -12 750.02 101.39
 5 1 12 864.01 85.99
 -6 -1 -12 442.06 40.2
 6 1 12 342.57 40.3
 6 1 12 401.26 40.1
 -7 -1 -12 600.14 57.49
 -7 -1 -12 658.33 57.49
 7 1 12 544.45 57.09
 7 1 12 492.85 57.69
 -8 -1 -12 701.83 63.89
 8 1 12 593.24 62.99
 8 1 12 604.24 64.39
 -9 -1 -12 24.6 8.3
 -9 -1 -12 28.4 8.9
 -9 -1 -12 13.8 25.2
 9 1 12 70.49 27.3
 9 1 12 30.3 8
 8 -2 -12 17.2 8.1
 -8 2 12 21.2 5.9
 -8 2 12 19.8 8.4
 -8 2 12 13.1 13.3
 7 -2 -12 18.3 5.8
 -7 2 12 14 9.8
 -7 2 12 12.7 6.1
 -7 2 12 18.9 5.3
 6 -2 -12 37.6 7.7
 6 -2 -12 35.7 8.9
 -6 2 12 47.2 8.8
 -6 2 12 52.09 7.1
 -6 2 12 37.9 14.3
 5 -2 -12 318.37 33.1
 5 -2 -12 295.27 35.1
 -5 2 12 348.57 34.2
 -5 2 12 332.07 40.3
 -5 2 12 325.37 32.5
 4 -2 -12 7.9 5
 4 -2 -12 6.8 2.8
 -4 2 12 4.7 6.8
 -4 2 12 8.3 2.5
 -4 2 12 6 3.6
 3 -2 -12 2468.35 226.88
 3 -2 -12 2181.98 228.38
 -3 2 12 2159.08 236.88
 -3 2 12 2377.86 226.48
 -3 2 12 2673.13 228.18
 2 -2 -12 515.65 51.59
 2 -2 -12 470.85 49.8
 -2 2 12 544.25 49.7
 -2 2 12 516.05 50.99
 -2 2 12 544.85 60.49
 1 -2 -12 1912.21 175.28
 -1 2 12 1882.61 174.58
 -1 2 12 1833.62 184.28
 -1 2 12 1673.13 173.68
 0 -2 -12 2894.31 283.87
 0 -2 -12 3012.2 273.47
 0 2 12 2943.21 273.07
 0 2 12 2507.25 272.47
 0 2 12 2960.6 283.57
 -1 -2 -12 174.88 19.8
 -1 -2 -12 214.78 31
 1 2 12 178.88 28.7
 1 2 12 177.38 19.4
 1 2 12 217.08 19.8
 -2 -2 -12 4.5 8.4
 -2 -2 -12 3.2 2.3
 -2 -2 -12 6.4 1.5
 2 2 12 5.8 2.5
 2 2 12 6 1.6
 2 2 12 3.5 7.3
 -3 -2 -12 90.09 11.3
 -3 -2 -12 96.69 23.8
 -3 -2 -12 88.59 10.4
 3 2 12 99.69 10.7
 3 2 12 139.69 26.1
 3 2 12 153.68 30.7
 -4 -2 -12 660.63 58.79
 -4 -2 -12 527.55 74.49
 4 2 12 590.54 59.19
 4 2 12 598.34 58.99
 -5 -2 -12 8.3 3.1
 -5 -2 -12 6.5 12.1
 5 2 12 29.9 25.9
 5 2 12 6.2 2.7
 5 2 12 14.1 4.3
 5 2 12 4.5 13.6
 -6 -2 -12 1583.74 146.39
 6 2 12 1593.84 146.69
 6 2 12 1369.26 146.69
 -7 -2 -12 96.99 12.1
 -7 -2 -12 61.49 28.6
 7 2 12 86.69 13
 7 2 12 101.69 12.5
 -8 -2 -12 611.44 56.69
 -8 -2 -12 583.34 56.49
 8 2 12 477.95 56.99
 8 2 12 549.85 56.09
 -9 -2 -12 245.58 25.8
 -9 -2 -12 260.37 27.1
 9 2 12 146.59 28.3
 9 2 12 208.78 25.1
 8 -3 -12 22.2 8.2
 -8 3 12 11.8 15.5
 -8 3 12 6.7 7.7
 7 -3 -12 20.8 6.5
 7 -3 -12 24.1 8.2
 -7 3 12 29.4 13.6
 -7 3 12 16.9 7.1
 6 -3 -12 60.89 9.3
 6 -3 -12 50.99 11.2
 -6 3 12 52.69 10.6
 -6 3 12 70.29 17.8
 5 -3 -12 219.58 24.9
 5 -3 -12 278.77 28
 -5 3 12 206.38 36.4
 -5 3 12 274.37 26.7
 4 -3 -12 988.8 96.69
 -4 3 12 1013.8 105.59
 3 -3 -12 183.48 20.6
 3 -3 -12 184.28 18.5
 -3 3 12 174.48 28.9
 -3 3 12 182.18 17.9
 -3 3 12 179.48 20
 2 -3 -12 3124.79 300.67
 2 -3 -12 2783.92 298.47
 -2 3 12 3146.69 310.27
 -2 3 12 3374.06 298.67
 -2 3 12 3262.77 300.07
 1 -3 -12 36.1 4.2
 1 -3 -12 43.1 6.8
 -1 3 12 37.8 12.7
 -1 3 12 40.8 5
 -1 3 12 44.6 6.1
 0 -3 -12 1408.16 148.79
 0 -3 -12 1485.85 138.29
 0 -3 -12 1536.15 136.49
 0 3 12 1450.25 137.89
 0 3 12 1213.58 137.09
 0 3 12 1503.45 148.89
 -1 -3 -12 277.37 26.2
 -1 -3 -12 246.88 27.5
 -1 -3 -12 253.87 37.9
 1 3 12 281.77 37.9
 1 3 12 253.57 27
 1 3 12 294.07 27.5
 -2 -3 -12 132.69 13.5
 -2 -3 -12 125.99 25.7
 -2 -3 -12 113.49 14.5
 2 3 12 126.99 14.3
 2 3 12 177.28 28.2
 -3 -3 -12 5.9 2.1
 -3 -3 -12 11.3 13.4
 -3 -3 -12 1.2 2.4
 3 3 12 24.7 15.8
 3 3 12 0.4 1.9
 3 3 12 4.5 2.1
 -4 -3 -12 42.8 7.5
 -4 -3 -12 49.9 6.9
 -4 -3 -12 40.1 18.3
 4 3 12 106.59 34.4
 4 3 12 85.49 23.5
 4 3 12 57.79 7.8
 4 3 12 46.5 7
 -5 -3 -12 440.36 95.49
 -5 -3 -12 705.43 60.79
 5 3 12 613.64 61.79
 5 3 12 593.64 60.89
 -6 -3 -12 11.1 15.5
 -6 -3 -12 42.2 7.2
 6 3 12 95.59 29.2
 6 3 12 80.69 42.4
 6 3 12 33.6 7.2
 6 3 12 41.6 7.5
 -7 -3 -12 1198.98 114.89
 7 3 12 1155.88 114.99
 -8 -3 -12 25.7 24.5
 -8 -3 -12 39.2 8.3
 8 3 12 105.89 31.7
 8 3 12 31.1 9.7
 8 3 12 38.5 8.4
 -9 -3 -12 681.83 61.59
 -9 -3 -12 602.74 61.39
 9 3 12 504.55 62.29
 8 -4 -12 190.88 23.3
 -8 4 12 182.28 38.4
 7 -4 -12 17.5 6.5
 -7 4 12 9.7 7.6
 -7 4 12 2.1 12.2
 6 -4 -12 19.2 8.5
 6 -4 -12 52.99 8.1
 -6 4 12 36.1 9.3
 -6 4 12 41.4 17.1
 5 -4 -12 165.38 17.8
 5 -4 -12 178.38 20.7
 -5 4 12 144.69 29.9
 -5 4 12 144.29 26.6
 -5 4 12 179.38 20
 4 -4 -12 1074.29 107.89
 4 -4 -12 902.01 105.29
 -4 4 12 1037.1 115.49
 -4 4 12 1244.48 107.59
 -4 4 12 1300.27 121.69
 3 -4 -12 1476.75 152.18
 3 -4 -12 1668.83 154.68
 -3 4 12 1428.46 151.78
 -3 4 12 1720.63 153.98
 -3 4 12 1732.43 166.28
 2 -4 -12 1276.07 124.29
 2 -4 -12 1208.68 122.09
 -2 4 12 1210.58 122.29
 -2 4 12 1393.46 123.89
 -2 4 12 1325.27 134.89
 1 -4 -12 2856.61 270.17
 1 -4 -12 2899.81 268.77
 -1 4 12 2603.14 268.57
 -1 4 12 2902.41 280.87
 -1 4 12 2824.02 269.67
 0 -4 -12 252.37 23.1
 0 -4 -12 220.98 24.5
 0 -4 -12 231.68 34.6
 0 4 12 235.48 24.4
 0 4 12 209.38 23.4
 0 4 12 228.08 34.2
 -1 -4 -12 1280.67 110.99
 -1 -4 -12 1097.59 123.39
 -1 -4 -12 1087.99 111.49
 1 4 12 1036.4 110.79
 1 4 12 1251.77 124.49
 -2 -4 -12 12.4 3
 -2 -4 -12 9.7 3.8
 -2 -4 -12 7.5 10
 2 4 12 17.3 12.3
 2 4 12 7.4 3.1
 -3 -4 -12 5.9 2.8
 -3 -4 -12 6.4 12.1
 -3 -4 -12 11.9 4.4
 3 4 12 8.6 13.4
 3 4 12 5.8 2.8
 -4 -4 -12 3.9 12.5
 -4 -4 -12 12.8 3.7
 -4 -4 -12 13.2 4.5
 4 4 12 16.2 12.8
 4 4 12 9.6 3.5
 4 4 12 10.1 3.4
 4 4 12 35 26
 -5 -4 -12 114.39 32.1
 -5 -4 -12 130.59 14.9
 5 4 12 124.29 15.1
 5 4 12 123.09 15.3
 5 4 12 234.88 55.59
 -6 -4 -12 690.23 61.39
 6 4 12 587.84 61.29
 6 4 12 561.24 61.39
 -7 -4 -12 135.89 16
 7 4 12 130.49 16.5
 7 4 12 107.59 16.4
 -8 -4 -12 1205.88 105.29
 8 4 12 935.81 105.89
 8 4 12 1048.7 104.99
 7 -5 -12 20.5 7.4
 7 -5 -12 11.8 10.2
 -7 5 12 20.6 19.9
 -7 5 12 14.5 8.6
 -7 5 12 23.9 19.2
 6 -5 -12 4.4 4.8
 6 -5 -12 5.4 6.7
 -6 5 12 1.4 14
 -6 5 12 5.4 6.2
 -6 5 12 2.4 12.2
 5 -5 -12 406.66 43.9
 5 -5 -12 465.65 46.9
 -5 5 12 405.26 55.69
 -5 5 12 492.15 46.2
 -5 5 12 443.86 59.59
 4 -5 -12 47.4 5.6
 4 -5 -12 42.4 7.1
 4 -5 -12 33.6 8.6
 -4 5 12 41.2 15.8
 -4 5 12 51.19 20.2
 -4 5 12 49 6.2
 -4 5 12 63.09 10.1
 3 -5 -12 1278.67 127.19
 3 -5 -12 1336.37 129.69
 3 -5 -12 1304.17 126.59
 -3 5 12 1360.46 128.99
 -3 5 12 1176.18 137.29
 -3 5 12 1586.84 151.48
 -3 5 12 1307.47 126.99
 2 -5 -12 796.92 77.89
 2 -5 -12 830.32 77.69
 2 -5 -12 769.62 80.39
 -2 5 12 864.01 79.89
 -2 5 12 785.32 77.99
 -2 5 12 782.32 90.59
 1 -5 -12 1852.61 174.48
 1 -5 -12 1779.42 176.28
 -1 5 12 1828.52 187.38
 -1 5 12 2004.8 176.28
 -1 5 12 1667.63 174.68
 0 -5 -12 1069.19 95.99
 0 -5 -12 1037 95.99
 0 -5 -12 878.21 97.09
 0 -5 -12 1040.8 109.39
 0 5 12 1041.3 109.29
 0 5 12 891.01 96.09
 0 5 12 1001.7 97.19
 -1 -5 -12 401.96 52.59
 -1 -5 -12 405.46 39.4
 -1 -5 -12 433.96 39.5
 -1 -5 -12 353.26 40.4
 1 5 12 364.36 39.7
 1 5 12 416.36 53.09
 -2 -5 -12 392.36 35.8
 -2 -5 -12 357.86 50.69
 -2 -5 -12 313.77 36.7
 -2 -5 -12 359.06 35.8
 2 5 12 388.16 52.19
 2 5 12 328.67 36.1
 -3 -5 -12 211.38 28
 -3 -5 -12 280.27 27.2
 -3 -5 -12 260.97 43.2
 3 5 12 334.17 52.19
 -4 -5 -12 432.86 64.79
 -4 -5 -12 566.24 47.1
 -4 -5 -12 377.86 48.7
 4 5 12 445.56 47
 -5 -5 -12 52.29 24.6
 -5 -5 -12 73.49 9.9
 5 5 12 106.79 29.7
 5 5 12 51.59 10
 5 5 12 162.48 53.09
 5 5 12 53.79 9.4
 -6 -5 -12 447.46 42.2
 6 5 12 373.76 42.2
 6 5 12 401.66 42.5
 -7 -5 -12 284.07 25.3
 -7 -5 -12 128.89 44.5
 7 5 12 214.08 25.1
 7 5 12 207.38 25.5
 -8 -5 -12 316.67 35.5
 8 5 12 326.47 33.4
 8 5 12 255.17 34.1
 8 5 12 289.97 48.3
 7 -6 -12 6.5 17.5
 7 -6 -12 55.29 10.1
 -7 6 12 29.6 21.7
 -7 6 12 20.5 22.3
 6 -6 -12 -0.5 8.1
 6 -6 -12 3.9 5.3
 -6 6 12 4.4 17.1
 -6 6 12 -5.9 7.2
 -6 6 12 0.1 13.1
 5 -6 -12 59.39 7.2
 5 -6 -12 68.59 10.1
 5 -6 -12 49.1 11.5
 -5 6 12 77.99 12.7
 -5 6 12 66.99 24.7
 -5 6 12 51.89 21.1
 4 -6 -12 798.62 71.69
 4 -6 -12 747.13 72.89
 4 -6 -12 771.22 75.49
 -4 6 12 769.52 89.39
 -4 6 12 857.21 75.19
 -4 6 12 608.34 71.89
 -4 6 12 696.63 85.89
 3 -6 -12 131.29 14.6
 3 -6 -12 124.79 13.8
 3 -6 -12 143.29 17.5
 -3 6 12 144.29 29.6
 -3 6 12 111.69 25
 -3 6 12 119.89 14.3
 -3 6 12 156.98 17
 2 -6 -12 1189.38 124.29
 2 -6 -12 1351.36 122.19
 2 -6 -12 1250.57 122.39
 -2 6 12 1332.37 137.29
 -2 6 12 1298.67 122.59
 -2 6 12 1320.77 124.19
 -2 6 12 1131.19 133.19
 1 -6 -12 92.59 13.1
 1 -6 -12 94.99 11.2
 -1 6 12 103.69 23.9
 -1 6 12 107.29 13.3
 -1 6 12 99.09 20.9
 -1 6 12 97.69 11.9
 0 -6 -12 1572.44 165.28
 0 -6 -12 1786.72 164.08
 0 -6 -12 1793.62 163.98
 0 6 12 1519.55 164.18
 0 6 12 1866.81 179.28
 -1 -6 -12 370.46 53.19
 -1 -6 -12 444.46 41.1
 -1 -6 -12 396.16 42.4
 -1 -6 -12 421.66 41.1
 1 6 12 374.36 41.3
 1 6 12 451.85 56.99
 -2 -6 -12 133.29 29.2
 -2 -6 -12 137.89 15.2
 -2 -6 -12 128.79 15.2
 -2 -6 -12 134.09 16.9
 2 6 12 122.39 15.6
 2 6 12 179.48 35.5
 -3 -6 -12 114.79 13.1
 -3 -6 -12 85.09 14.1
 -3 -6 -12 125.49 29.9
 -3 -6 -12 106.49 12.7
 3 6 12 154.98 38.6
 3 6 12 84.09 13.1
 -4 -6 -12 25.5 17.7
 -4 -6 -12 21.9 6.1
 -4 -6 -12 21.9 7.1
 4 6 12 44.7 30.8
 4 6 12 25.8 6.8
 -5 -6 -12 224.38 27
 -5 -6 -12 213.08 45.4
 5 6 12 248.68 26.2
 -6 -6 -12 0.4 5
 -6 -6 -12 2.9 19.8
 6 6 12 12.6 17.2
 6 6 12 2.4 5.6
 6 6 12 -3.3 37.3
 -7 -6 -12 547.75 51.29
 7 6 12 433.26 51.29
 6 -7 -12 10.6 11.5
 6 -7 -12 41.4 8.8
 -6 7 12 28.9 11.9
 -6 7 12 27.6 24.4
 -6 7 12 32.7 21.5
 5 -7 -12 11.6 5.6
 5 -7 -12 14.7 4
 5 -7 -12 -2.9 11.9
 -5 7 12 8.4 15.7
 -5 7 12 3.5 8.1
 -5 7 12 20.7 20.4
 4 -7 -12 338.67 30.2
 4 -7 -12 305.77 34.5
 4 -7 -12 273.97 31.2
 -4 7 12 369.26 34.4
 -4 7 12 270.77 30.5
 -4 7 12 308.97 49
 -4 7 12 237.48 44.4
 3 -7 -12 468.75 44.6
 3 -7 -12 437.86 45.3
 3 -7 -12 432.56 47.5
 -3 7 12 481.35 62.19
 -3 7 12 418.96 45.1
 -3 7 12 548.55 48
 -3 7 12 391.66 58.39
 2 -7 -12 287.97 34.9
 2 -7 -12 367.16 32.8
 -2 7 12 321.37 48
 -2 7 12 302.07 33.1
 -2 7 12 358.66 35.4
 -2 7 12 285.97 44.7
 1 -7 -12 1310.87 136.99
 -1 7 12 1431.36 150.48
 -1 7 12 1321.97 147.69
 -1 7 12 1550.54 137.39
 0 -7 -12 12.7 4.1
 0 -7 -12 2.5 3.6
 0 -7 -12 3.2 4.7
 0 7 12 11.6 10.7
 0 7 12 5.7 12.7
 0 7 12 38.4 6.8
 -1 -7 -12 1329.97 119.09
 -1 -7 -12 1207.28 120.49
 -1 -7 -12 1183.88 131.69
 -1 -7 -12 1294.77 118.89
 1 7 12 1063.29 119.09
 1 7 12 1330.57 136.89
 1 7 12 1177.08 129.39
 -2 -7 -12 269.67 26.4
 -2 -7 -12 242.48 40.4
 -2 -7 -12 231.98 28.1
 -2 -7 -12 250.27 26.4
 2 7 12 325.67 50.89
 2 7 12 201.58 26.4
 -3 -7 -12 223.88 48.2
 -3 -7 -12 193.18 26.2
 -3 -7 -12 253.37 24.7
 -3 -7 -12 225.28 24.2
 3 7 12 359.86 62.99
 3 7 12 176.48 24.6
 -4 -7 -12 16.5 4.8
 -4 -7 -12 16.3 7.8
 -4 -7 -12 13.8 18.9
 -4 -7 -12 9.8 5.5
 4 7 12 8 5
 4 7 12 9.5 31.4
 -5 -7 -12 21.9 9.1
 -5 -7 -12 38.9 9
 -5 -7 -12 22.3 22.1
 5 7 12 83.09 29.4
 5 7 12 45.9 9.4
 5 7 12 61.39 38.9
 -6 -7 -12 347.67 35.8
 6 7 12 301.47 36
 -7 -7 -12 33.6 11.4
 -7 -7 -12 11.8 27.3
 -7 -7 -12 33.5 10.3
 7 7 12 21.4 9.3
 7 7 12 3.2 21
 7 7 12 42.7 14.1
 5 -8 -12 48 10.2
 5 -8 -12 46.5 14.1
 5 -8 -12 52.09 8.5
 -5 8 12 45.8 27.1
 4 -8 -12 4.7 5.3
 4 -8 -12 11.8 8.9
 4 -8 -12 4.5 3.7
 -4 8 12 2.7 13.4
 -4 8 12 -1.6 20
 -4 8 12 3.3 5.2
 -4 8 12 4.8 9
 3 -8 -12 335.27 41.3
 3 -8 -12 345.47 38.9
 3 -8 -12 398.86 38.4
 -3 8 12 396.56 41.8
 -3 8 12 396.56 56.89
 -3 8 12 360.66 39
 -3 8 12 450.05 59.49
 2 -8 -12 170.08 25.1
 2 -8 -12 204.38 22.5
 -2 8 12 200.38 23.4
 -2 8 12 231.28 25.5
 -2 8 12 237.88 41.6
 -2 8 12 238.88 39.9
 1 -8 -12 311.77 35.1
 1 -8 -12 337.57 32.7
 -1 8 12 346.77 48.5
 -1 8 12 293.47 33.3
 -1 8 12 292.97 48
 0 -8 -12 1179.78 126.39
 0 -8 -12 1391.26 124.69
 0 8 12 1418.56 143.39
 0 8 12 1243.58 137.79
 0 8 12 1188.98 125.19
 -1 -8 -12 44.6 8.7
 -1 -8 -12 49.3 11.6
 -1 -8 -12 50.89 8.7
 1 8 12 48.7 19.1
 1 8 12 68.49 28.1
 1 8 12 41.1 9.2
 -2 -8 -12 727.83 62.49
 -2 -8 -12 588.64 64.09
 -2 -8 -12 516.65 93.39
 -2 -8 -12 665.53 61.99
 2 8 12 613.14 73.09
 2 8 12 543.75 62.59
 -3 -8 -12 3.7 5.2
 -3 -8 -12 21.9 16.5
 -3 -8 -12 7.9 7.6
 -3 -8 -12 8.9 4.6
 3 8 12 24.9 30.4
 3 8 12 8 6
 3 8 12 8.6 11.9
 -4 -8 -12 37.9 8.4
 -4 -8 -12 21.9 10.4
 -4 -8 -12 13.5 18.9
 -4 -8 -12 32.7 10.7
 4 8 12 20.1 9.3
 4 8 12 70.49 44.5
 4 8 12 31.2 14.4
 -5 -8 -12 20.6 10.8
 -5 -8 -12 17.4 21
 -5 -8 -12 10.2 5.5
 -5 -8 -12 12.9 7.6
 5 8 12 27.7 14.2
 5 8 12 56.39 47.9
 5 8 12 20.9 8.8
 -6 -8 -12 256.47 30
 3 -9 -12 5.6 5.9
 3 -9 -12 6.6 9.1
 3 -9 -12 20.3 6
 -3 9 12 13.5 9.7
 -3 9 12 2.5 6.6
 -3 9 12 5.8 18.2
 -3 9 12 7.3 22.1
 2 -9 -12 693.83 75.99
 2 -9 -12 810.32 73.19
 -2 9 12 807.42 93.59
 -2 9 12 682.03 91.49
 -2 9 12 689.83 73.99
 1 -9 -12 156.18 16.9
 1 -9 -12 132.59 20.4
 -1 9 12 129.69 37.1
 -1 9 12 126.29 18.1
 -1 9 12 126.69 33.4
 0 -9 -12 536.25 62.09
 0 -9 -12 600.94 59.29
 0 -9 -12 577.84 58.59
 0 9 12 687.83 81.49
 0 9 12 554.44 59.79
 0 9 12 570.14 74.79
 -1 -9 -12 397.66 39.2
 -1 -9 -12 357.56 41.9
 -1 -9 -12 403.16 39.8
 1 9 12 436.56 66.69
 1 9 12 349.87 52.89
 1 9 12 323.67 40.3
 -2 -9 -12 172.98 21.7
 -2 -9 -12 179.18 25
 -2 -9 -12 197.48 22.3
 2 9 12 295.67 63.89
 2 9 12 200.08 35.3
 2 9 12 144.29 23.7
 -3 -9 -12 110.19 21.3
 -3 -9 -12 141.29 17.5
 -3 -9 -12 120.69 16.2
 -3 -9 -12 107.09 31.9
 3 9 12 195.38 67.59
 3 9 12 120.69 28.2
 3 9 12 123.39 19.2
 -4 -9 -12 9.1 12
 -4 -9 -12 9.1 19.1
 -4 -9 -12 8.8 7.5
 4 9 12 -4.4 9.9
 4 9 12 12.7 43.1
 4 9 12 8.7 13.9
 1 8 -13 603.74 89.39
 -1 -8 13 459.35 48.4
 -1 -8 13 439.76 48
 -1 -8 13 547.55 50.39
 -1 -8 13 431.86 55.79
 0 8 -13 407.86 76.19
 0 -8 13 374.86 39
 0 -8 13 353.36 48.2
 0 -8 13 371.46 38
 -1 8 -13 58.49 35.1
 1 -8 13 66.79 22.5
 1 -8 13 46.3 10.1
 1 -8 13 58.49 9.7
 -2 8 -13 81.39 37.7
 2 -8 13 108.29 12.9
 2 -8 13 118.19 29
 -4 -7 13 186.68 22
 -3 -7 13 101.09 19.1
 -3 -7 13 145.89 16.4
 -3 -7 13 125.59 15.5
 -3 -7 13 137.79 17.3
 -2 -7 13 538.05 63.49
 -2 -7 13 558.24 57.49
 -2 -7 13 649.43 58.79
 1 7 -13 35 29.5
 -1 -7 13 28.8 7.2
 -1 -7 13 23.5 6.4
 -1 -7 13 18.2 6.1
 -1 -7 13 14.7 10.6
 0 7 -13 830.12 103.29
 0 -7 13 663.53 77.59
 0 -7 13 682.73 68.49
 0 -7 13 668.83 67.59
 -1 7 -13 198.18 51.29
 1 -7 13 179.68 20.3
 1 -7 13 179.78 18.8
 1 -7 13 156.18 30.2
 -2 7 -13 198.18 52.19
 2 -7 13 195.88 21.1
 2 -7 13 246.78 37
 -3 7 -13 83.29 37.6
 3 -7 13 88.19 13.2
 3 -7 13 85.59 26.7
 -4 7 -13 -5.8 27.3
 -4 7 -13 -1.1 13
 4 -7 13 3.9 5.5
 4 -7 13 5.9 15.6
 4 -7 13 -0.9 5.7
 -5 7 -13 82.89 30.4
 5 -7 13 67.49 12.9
 -5 -6 13 21.8 8.7
 -5 -6 13 12.7 12.8
 -5 -6 13 12.7 5.4
 -5 -6 13 5.8 20.7
 -5 -6 13 16.2 5.2
 -4 -6 13 227.48 40.6
 -4 -6 13 274.07 27.3
 -4 -6 13 220.98 32.1
 -4 -6 13 338.77 29.9
 -4 -6 13 262.37 28.1
 -4 -6 13 270.47 29.8
 -3 -6 13 294.17 28.2
 -3 -6 13 242.98 27.5
 -3 -6 13 286.67 27.3
 -3 -6 13 237.98 31.2
 -3 -6 13 249.78 31.9
 -2 -6 13 342.77 36.3
 -2 -6 13 344.67 42.5
 -2 -6 13 366.76 36
 -1 -6 13 932.71 88.19
 -1 -6 13 922.31 96.49
 -1 -6 13 838.92 87.59
 0 6 -13 131.29 40.7
 0 -6 13 77.69 11.5
 0 -6 13 92.19 20.7
 0 -6 13 83.89 10.7
 -1 6 -13 854.01 105.39
 1 -6 13 738.53 75.89
 1 -6 13 774.32 77.39
 1 -6 13 838.02 89.59
 -2 6 -13 6.2 18
 2 -6 13 13.4 11.8
 2 -6 13 19.1 5.8
 -3 6 -13 158.78 45.2
 -3 6 -13 190.28 29.3
 3 -6 13 228.18 37.3
 3 -6 13 196.18 22.1
 -4 6 -13 24.6 22.8
 -4 6 -13 25.3 15.5
 4 -6 13 24.8 6.5
 4 -6 13 28.9 7
 4 -6 13 35.9 19.8
 -5 6 -13 18.5 17.9
 -5 6 -13 24.7 27.1
 5 -6 13 31 7
 5 -6 13 35.4 8
 5 -6 13 21.7 17
 -6 6 -13 150.48 51.59
 -6 6 -13 108.39 37.1
 6 -6 13 226.18 22.1
 6 -6 13 243.58 51.69
 6 -6 13 156.98 20.6
 -6 -5 13 1.8 16.3
 -6 -5 13 -2.4 7.1
 -6 -5 13 -0.1 3.4
 -6 -5 13 -0.5 5.1
 -5 -5 13 3.7 6.2
 -5 -5 13 2.5 3.2
 -5 -5 13 5.7 4.4
 -5 -5 13 0.9 11.7
 -4 -5 13 55.39 10.1
 -4 -5 13 51.89 7.7
 -4 -5 13 35.9 13.1
 -4 -5 13 58.39 8.5
 -4 -5 13 46.1 11.6
 -3 -5 13 505.75 60.79
 -3 -5 13 659.33 56.59
 -3 -5 13 561.94 61.69
 -3 -5 13 558.34 55.79
 -2 -5 13 462.05 45.3
 -2 -5 13 496.25 53.69
 -2 -5 13 425.86 49.7
 -2 -5 13 470.15 45.4
 -2 -5 13 429.96 45.5
 -1 -5 13 913.41 97.99
 -1 -5 13 874.61 88.09
 -1 -5 13 908.41 88.89
 -1 -5 13 937.91 93.79
 -1 -5 13 918.61 88.59
 0 5 -13 1369.46 139.39
 0 -5 13 1121.69 120.19
 0 -5 13 1006.3 109.39
 -1 5 -13 575.64 83.49
 1 -5 13 630.94 72.89
 1 -5 13 630.14 58.89
 1 -5 13 550.04 57.69
 -2 5 -13 451.95 51.99
 -2 5 -13 361.16 65.89
 2 -5 13 458.65 45.6
 2 -5 13 508.95 60.29
 -3 5 -13 -0.9 9.9
 -3 5 -13 -4.7 12.4
 3 -5 13 6.3 11.8
 3 -5 13 2.2 3.8
 -4 5 -13 2.4 12.1
 -4 5 -13 -1.1 17.5
 4 -5 13 1.7 3.4
 4 -5 13 5.7 3.3
 4 -5 13 9.3 13.7
 -5 5 -13 6.2 18.9
 -5 5 -13 4 14.4
 5 -5 13 9.6 15.8
 5 -5 13 6.7 4.6
 5 -5 13 0.9 4.8
 -6 5 -13 101.39 35.1
 6 -5 13 209.48 20.3
 6 -5 13 151.58 18.6
 -7 5 -13 34.8 27.8
 -7 5 -13 59.09 28.6
 7 -5 13 127.99 40.2
 7 -5 13 65.89 12.4
 7 -5 13 92.59 14.1
 -7 -4 13 85.29 10.5
 -7 -4 13 91.09 13.5
 -7 -4 13 102.19 16.1
 -7 -4 13 128.59 36.4
 -6 -4 13 40.9 7.6
 -6 -4 13 28.6 5.8
 -6 -4 13 41 18.8
 -6 -4 13 47 9.4
 -5 -4 13 50.19 7.9
 -5 -4 13 28.5 7.8
 -5 -4 13 52.19 17.3
 -5 -4 13 53.29 10.5
 -5 -4 13 47.9 6.7
 -4 -4 13 197.38 19.3
 -4 -4 13 185.28 18.5
 -4 -4 13 167.88 23.6
 -4 -4 13 151.88 17.5
 -4 -4 13 137.09 26
 -3 -4 13 14.1 3.6
 -3 -4 13 18.1 4.7
 -3 -4 13 11.7 4.3
 -3 -4 13 12.9 8.7
 -3 -4 13 9.9 8.1
 -2 -4 13 1604.74 156.68
 -2 -4 13 1538.05 147.09
 -2 -4 13 1520.45 153.38
 -2 -4 13 1420.06 146.99
 -2 -4 13 1569.94 146.99
 -1 -4 13 177.28 28
 -1 -4 13 155.48 17.7
 -1 -4 13 162.18 17.4
 -1 -4 13 179.28 17.9
 -1 -4 13 160.98 23.9
 0 -4 13 2265.57 208.08
 0 -4 13 2202.38 211.88
 0 -4 13 1874.51 197.98
 0 -4 13 1996.7 198.98
 -1 4 -13 305.37 52.19
 -1 4 -13 281.07 36.6
 1 -4 13 278.87 30.4
 1 -4 13 346.27 44.3
 -2 4 -13 610.54 109.99
 -2 4 -13 858.91 89.99
 2 -4 13 1017.1 105.69
 2 -4 13 791.12 80.79
 -3 4 -13 78.39 21.3
 -3 4 -13 50.59 23.8
 3 -4 13 98.69 11.5
 3 -4 13 113.89 26.4
 -4 4 -13 1.2 10.6
 -4 4 -13 5.9 13.3
 4 -4 13 6 13.7
 4 -4 13 5.7 2.9
 4 -4 13 7 4.5
 -5 4 -13 128.69 31.3
 -5 4 -13 106.59 35.2
 5 -4 13 151.38 17.6
 5 -4 13 166.28 16.8
 -6 4 -13 5.4 15.6
 -6 4 -13 -1.9 15.9
 6 -4 13 3.1 5.3
 6 -4 13 15.4 5.1
 6 -4 13 11.9 18.5
 7 -4 13 315.77 32.9
 7 -4 13 280.47 31.7
 -8 4 -13 38 33.3
 -8 4 -13 51.49 32.7
 8 -4 13 129.79 45.9
 8 -4 13 107.59 15.7
 8 -4 13 77.09 13.6
 -7 -3 13 3.6 6.9
 -7 -3 13 1.5 4.4
 -6 -3 13 114.59 12.7
 -6 -3 13 115.39 14.6
 -6 -3 13 153.38 16.4
 -5 -3 13 0.7 4.1
 -5 -3 13 2.1 2.1
 -5 -3 13 -2.4 7
 -5 -3 13 4.8 10.3
 -5 -3 13 -1.1 2.7
 -4 -3 13 281.17 25.1
 -4 -3 13 216.48 24
 -4 -3 13 255.87 34.8
 -4 -3 13 211.78 31.3
 -3 -3 13 808.12 92.49
 -3 -3 13 886.51 84.89
 -3 -3 13 822.82 92.19
 -3 -3 13 1018.7 84.89
 -3 -3 13 823.42 84.19
 -2 -3 13 374.06 46.4
 -2 -3 13 350.96 43.4
 -2 -3 13 385.86 36.6
 -2 -3 13 369.66 36.5
 -2 -3 13 356.66 36.6
 -1 -3 13 1987.6 199.68
 -1 -3 13 2293.07 212.58
 -1 -3 13 1919.71 199.48
 -1 -3 13 2314.77 200.08
 -1 -3 13 1965.5 206.68
 0 -3 13 36.2 12.9
 0 -3 13 25 12.3
 0 -3 13 36.3 5.4
 0 -3 13 21.5 3.8
 -1 3 -13 2343.47 226.88
 -1 3 -13 1862.21 208.58
 1 -3 13 2315.07 217.28
 1 -3 13 1984.5 201.48
 -2 3 -13 16.7 10.3
 -2 3 -13 14.1 15.5
 2 -3 13 48.1 19.1
 2 -3 13 32.3 19.9
 -3 3 -13 459.25 53.79
 -3 3 -13 367.76 59.39
 3 -3 13 380.36 39.7
 -4 3 -13 4.2 10.5
 -4 3 -13 6.4 11.1
 4 -3 13 16.4 13.7
 4 -3 13 15.4 3.9
 -5 3 -13 15.7 17.7
 -5 3 -13 8.5 12.8
 5 -3 13 15.6 16.9
 5 -3 13 13.7 4.1
 -6 3 -13 105.79 35.3
 -6 3 -13 110.89 33.2
 6 -3 13 120.49 14.1
 -7 3 -13 37.6 23.7
 -7 3 -13 59.89 30.9
 7 -3 13 170.48 41.8
 7 -3 13 73.49 11.2
 -8 3 -13 333.17 78.19
 -8 3 -13 339.37 68.59
 8 -3 13 451.45 42.8
 7 2 -13 233.18 30.4
 -7 -2 13 255.47 29.9
 -7 -2 13 338.97 35.1
 -7 -2 13 272.17 28
 6 2 -13 32.1 8.2
 -6 -2 13 46.2 8.4
 -6 -2 13 20 10.5
 -6 -2 13 32.7 6.3
 -6 -2 13 23.3 4.2
 -6 -2 13 23.4 8.4
 -5 -2 13 38.7 6.3
 -5 -2 13 24.2 19.1
 -5 -2 13 31.5 4.5
 -5 -2 13 39.3 7.6
 -5 -2 13 34 12.5
 -4 -2 13 33.5 5.5
 -4 -2 13 36.2 14.3
 -4 -2 13 26.1 4.6
 -4 -2 13 36.2 12.7
 -4 -2 13 40.8 6.8
 -3 -2 13 1376.36 138.49
 -3 -2 13 1307.27 138.19
 -3 -2 13 1372.36 128.79
 -3 -2 13 1330.37 129.59
 -3 -2 13 1328.87 129.19
 -2 -2 13 752.32 69.79
 -2 -2 13 723.93 78.19
 -2 -2 13 747.73 80.39
 -2 -2 13 666.03 69.99
 -1 -2 13 832.82 74.29
 -1 -2 13 744.03 73.79
 -1 -2 13 741.83 73.89
 -1 -2 13 706.53 84.39
 -1 -2 13 794.52 82.39
 0 2 -13 1605.54 165.28
 0 -2 13 1569.14 156.28
 0 -2 13 1671.33 165.98
 0 -2 13 1521.25 157.08
 0 -2 13 1869.71 171.68
 -1 2 -13 13.8 9.5
 1 -2 13 11.9 9.5
 1 -2 13 6.5 6.4
 -2 2 -13 1601.94 179.78
 -2 2 -13 1706.93 171.28
 -3 2 -13 29.3 13.9
 -3 2 -13 49.6 22.1
 3 -2 13 31.5 5.2
 3 -2 13 75.79 28.8
 3 -2 13 61.49 21.1
 -4 2 -13 135.69 29.1
 -4 2 -13 150.18 33.7
 4 -2 13 163.48 16.6
 -5 2 -13 0.3 11.2
 -5 2 -13 4.4 11.5
 5 -2 13 0.4 12.5
 5 -2 13 2.6 2.4
 -6 2 -13 61.09 26.9
 -6 2 -13 36 20.2
 6 -2 13 165.78 37.6
 6 -2 13 76.09 9.9
 -7 2 -13 235.18 48.4
 -7 2 -13 175.78 43.3
 7 -2 13 202.68 22.7
 -8 2 -13 188.28 49.6
 -8 2 -13 163.28 48.1
 8 -2 13 201.08 22.9
 -9 2 -13 327.77 73.79
 -9 2 -13 308.57 71.49
 9 -2 13 444.96 42.2
 8 1 -13 202.08 27
 -8 -1 13 227.88 26.3
 -8 -1 13 240.58 23.9
 -8 -1 13 206.68 28.8
 -8 -1 13 203.48 33.4
 7 1 -13 342.37 38.4
 -7 -1 13 403.76 36.5
 -7 -1 13 384.56 37.9
 -7 -1 13 309.37 39.6
 6 1 -13 35.2 8.4
 -6 -1 13 40.1 8.5
 -6 -1 13 28.6 9.6
 -6 -1 13 32.6 6.2
 5 1 -13 4.3 3.8
 -5 -1 13 4.5 3.5
 -5 -1 13 4.7 2.8
 4 1 -13 353.66 38.9
 -4 -1 13 462.55 50.59
 -4 -1 13 373.36 37.8
 -4 -1 13 375.66 38.6
 -4 -1 13 371.16 36.9
 -3 -1 13 5.7 7.8
 -3 -1 13 1.9 1.5
 -3 -1 13 0.7 6.5
 -3 -1 13 4.7 2.3
 -3 -1 13 1.9 2.5
 -2 -1 13 932.81 105.59
 -2 -1 13 982.2 97.19
 -2 -1 13 1120.79 108.79
 -2 -1 13 1044.5 97.19
 -2 -1 13 994.8 97.79
 -1 -1 13 208.68 20.4
 -1 -1 13 191.58 19.8
 -1 -1 13 228.58 31.4
 -1 -1 13 181.68 27.7
 0 1 -13 1472.15 173.98
 0 -1 13 1985.2 180.18
 0 -1 13 1774.02 165.48
 0 -1 13 1734.63 175.38
 -1 1 -13 1171.68 142.09
 1 -1 13 1535.25 145.29
 1 -1 13 1483.15 148.19
 -2 1 -13 299.97 40.8
 2 -1 13 282.37 28.4
 -3 1 -13 1186.08 128.99
 -3 1 -13 1115.39 132.79
 3 -1 13 1238.78 114.39
 -4 1 -13 17.9 12.7
 -4 1 -13 42.5 17.9
 4 -1 13 40.5 5.9
 4 -1 13 83.09 25.4
 4 -1 13 78.09 33.4
 -5 1 -13 47.6 20.8
 -5 1 -13 30.3 17.5
 5 -1 13 72.89 8.4
 5 -1 13 165.98 51.39
 -6 1 -13 68.09 8.6
 -6 1 -13 54.09 24.1
 -6 1 -13 33.8 18
 6 -1 13 47.2 9.5
 6 -1 13 130.59 34.2
 -7 1 -13 186.28 45.1
 -7 1 -13 221.78 45.3
 7 -1 13 281.07 26.6
 -8 1 -13 186.48 46
 -8 1 -13 141.49 46.7
 8 -1 13 212.28 23.2
 -9 1 -13 546.65 50.49
 9 -1 13 414.06 50.79
 8 0 -13 606.04 61.19
 -8 0 13 573.74 65.29
 -8 0 13 588.94 60.79
 -8 0 13 603.54 58.99
 7 0 -13 64.29 12.4
 -7 0 13 76.09 12.4
 -7 0 13 76.99 10.1
 -7 0 13 72.29 16
 6 0 -13 127.19 15.5
 -6 0 13 92.79 17.8
 -6 0 13 140.69 15.4
 -6 0 13 124.89 13.4
 5 0 -13 13.2 4.7
 -5 0 13 7.2 4.2
 -5 0 13 8.7 3.1
 4 0 -13 9.5 3.7
 -4 0 13 6.4 2.5
 -4 0 13 6.4 3.3
 -4 0 13 4.2 9.8
 3 0 -13 258.17 24.2
 3 0 -13 248.08 25.7
 -3 0 13 208.28 32.4
 -3 0 13 239.78 23.4
 -3 0 13 217.48 24.4
 -3 0 13 230.58 22.8
 2 0 -13 236.28 25.5
 -2 0 13 215.58 23.6
 -2 0 13 279.37 34.2
 -2 0 13 249.58 24.6
 1 0 -13 4064.19 367.16
 -1 0 13 3715.53 375.36
 -1 0 13 3860.61 366.36
 -1 0 13 3735.03 365.46
 0 0 -13 80.59 8.9
 0 0 -13 66.09 16.6
 0 0 13 77.99 8.2
 0 0 13 90.29 18.8
 0 0 13 68.59 7.5
 0 0 13 71.09 16
 -1 0 -13 2652.03 240.98
 -1 0 -13 2636.44 253.37
 1 0 13 2309.87 240.38
 1 0 13 2737.93 253.57
 1 0 13 2351.96 240.68
 -2 0 -13 481.25 49.6
 -2 0 -13 519.55 62.89
 2 0 13 585.54 65.59
 -3 0 -13 830.62 79.59
 -3 0 -13 813.02 95.29
 3 0 13 842.12 80.19
 -4 0 -13 86.09 9.5
 -4 0 -13 99.19 24.8
 4 0 13 86.99 10.2
 -5 0 -13 47 6.1
 -5 0 -13 24.9 15.8
 5 0 13 75.19 34.2
 5 0 13 60.19 23.9
 5 0 13 32.1 6.1
 -6 0 -13 26.7 5.6
 -6 0 -13 42.2 6.4
 -6 0 -13 16.9 16.8
 -6 0 -13 11.9 17.4
 6 0 13 17.4 5.3
 -7 0 -13 5.8 18.1
 -7 0 -13 13.6 4.9
 -7 0 -13 18.5 5.6
 -7 0 -13 0.8 14.4
 7 0 13 37.5 23.3
 7 0 13 18.5 6.2
 -8 0 -13 453.05 40.8
 -8 0 -13 404.86 40.7
 8 0 13 343.17 41
 8 0 13 356.96 39.6
 -9 0 -13 43.1 10.7
 -9 0 -13 42.7 10.2
 -9 0 -13 26.1 29.5
 9 0 13 40 10.5
 9 0 13 47.7 9.2
 9 0 13 75.09 30.5
 8 -1 -13 11.4 7.7
 -8 1 13 21.1 5.8
 -8 1 13 16.6 12.1
 -8 1 13 16.2 7.1
 7 -1 -13 398.46 41.4
 -7 1 13 416.46 41.9
 -7 1 13 436.36 40.1
 -7 1 13 341.57 46.3
 6 -1 -13 3.4 3.9
 -6 1 13 2.8 7.2
 -6 1 13 2.7 2.9
 -6 1 13 5.7 4.7
 5 -1 -13 90.39 13.8
 5 -1 -13 87.19 11.4
 -5 1 13 101.59 12.4
 -5 1 13 89.39 10.5
 4 -1 -13 8.7 5
 4 -1 -13 11.9 3.7
 -4 1 13 10.3 3.9
 -4 1 13 10.1 2.7
 -4 1 13 4.9 7.8
 3 -1 -13 23.7 6.5
 3 -1 -13 34.4 5.2
 -3 1 13 28.4 12.4
 -3 1 13 33.9 6
 -3 1 13 35.6 3.8
 -3 1 13 34.4 4.4
 -3 1 13 32.5 3.7
 2 -1 -13 1291.87 116.09
 2 -1 -13 1092.19 117.39
 -2 1 13 1165.98 115.59
 -2 1 13 1265.47 117.09
 -2 1 13 1234.08 126.69
 1 -1 -13 813.02 84.19
 -1 1 13 925.41 94.19
 -1 1 13 866.21 83.79
 0 -1 -13 4568.94 414.06
 0 -1 -13 4143.09 402.16
 0 1 13 4028.8 401.66
 0 1 13 4146.08 412.26
 -1 -1 -13 99.09 21.1
 -1 -1 -13 119.69 12.4
 1 1 13 112.49 12.1
 1 1 13 124.39 22.6
 -2 -1 -13 2561.94 236.88
 -2 -1 -13 2479.95 251.37
 2 1 13 2403.86 236.48
 -3 -1 -13 11.8 11
 -3 -1 -13 4.5 1.8
 -3 -1 -13 3.1 2
 3 1 13 12.9 13.6
 3 1 13 2.6 1.9
 3 1 13 3 8.1
 -4 -1 -13 318.47 34.3
 -4 -1 -13 357.06 34.3
 -4 -1 -13 332.47 50.49
 4 1 13 370.96 34.8
 -5 -1 -13 8.6 3.1
 -5 -1 -13 3.9 11.5
 5 1 13 7.2 3.3
 5 1 13 12.9 15.9
 5 1 13 23.2 28
 -6 -1 -13 43.2 6.6
 -6 -1 -13 23.1 18
 6 1 13 22.8 6
 6 1 13 46.3 22.2
 6 1 13 63.19 35.8
 6 1 13 27 5.9
 -7 -1 -13 134.29 13.9
 -7 -1 -13 78.79 31.8
 -7 -1 -13 111.59 13.3
 7 1 13 86.09 13.6
 7 1 13 93.79 13
 -8 -1 -13 60.79 12.6
 -8 -1 -13 30.9 27.1
 -8 -1 -13 69.19 10.6
 8 1 13 57.49 10.4
 8 1 13 156.78 39
 8 1 13 60.09 12.2
 -9 -1 -13 372.76 42.4
 -9 -1 -13 474.25 43.4
 9 1 13 430.66 42.3
 9 1 13 321.97 44.7
 8 -2 -13 292.47 32.8
 -8 2 13 294.47 42.9
 -8 2 13 308.97 33.4
 -8 2 13 288.67 30.9
 7 -2 -13 81.69 12.7
 -7 2 13 78.79 19.9
 -7 2 13 85.19 11.1
 6 -2 -13 356.16 37.9
 6 -2 -13 380.16 40.5
 -6 2 13 424.96 39.2
 -6 2 13 342.27 37
 5 -2 -13 0.2 5.1
 5 -2 -13 2.9 2.9
 -5 2 13 8.2 3
 -5 2 13 2.1 6.3
 -5 2 13 1.7 3.4
 -5 2 13 2.6 9.7
 4 -2 -13 36.8 5.7
 4 -2 -13 25.8 7.3
 -4 2 13 42.8 7.2
 -4 2 13 35.2 5
 3 -2 -13 2.3 2.1
 3 -2 -13 1 3.4
 -3 2 13 7.6 3.5
 -3 2 13 1.1 1
 -3 2 13 1.6 7.2
 2 -2 -13 1193.58 122.99
 2 -2 -13 1233.48 121.19
 -2 2 13 1351.26 122.69
 -2 2 13 1300.07 132.79
 1 -2 -13 1075.29 105.99
 -1 2 13 1070.29 104.59
 -1 2 13 1151.28 116.19
 -1 2 13 1076.09 105.29
 0 -2 -13 1629.54 186.98
 0 -2 -13 1899.91 177.28
 0 2 13 1721.83 176.38
 0 2 13 2110.59 189.48
 0 2 13 1887.51 176.88
 -1 -2 -13 2631.44 288.17
 -1 -2 -13 3043.3 276.67
 1 2 13 3238.08 290.07
 1 2 13 2488.05 276.07
 1 2 13 3091.39 276.47
 -2 -2 -13 855.91 81.29
 -2 -2 -13 887.01 82.49
 -2 -2 -13 916.21 97.79
 2 2 13 801.42 81.39
 2 2 13 819.22 82.39
 -3 -2 -13 1471.45 162.98
 -3 -2 -13 1624.94 145.79
 -3 -2 -13 1475.05 146.39
 3 2 13 1515.75 145.89
 3 2 13 1507.65 146.59
 -4 -2 -13 27.5 5.3
 -4 -2 -13 22.9 14.9
 -4 -2 -13 27.1 4.6
 4 2 13 32 5.2
 4 2 13 41.6 17.3
 4 2 13 26.4 5.1
 4 2 13 86.29 34.5
 -5 -2 -13 15.2 3.9
 -5 -2 -13 11.2 13.4
 5 2 13 15.8 4.3
 5 2 13 25 15.4
 5 2 13 7.6 6.5
 5 2 13 18.3 25
 -6 -2 -13 3.8 3
 -6 -2 -13 -3.1 12.5
 6 2 13 3.3 2.7
 6 2 13 2.2 28.7
 6 2 13 8.2 16.8
 6 2 13 1.7 3.4
 -7 -2 -13 234.58 21.1
 -7 -2 -13 113.09 37.3
 7 2 13 188.38 21
 7 2 13 172.88 21.6
 -8 -2 -13 300.47 29
 -8 -2 -13 253.47 28.3
 8 2 13 235.78 29.5
 8 2 13 253.97 28.4
 -9 -2 -13 115.49 17.1
 -9 -2 -13 36.2 30.9
 -9 -2 -13 111.69 15.1
 9 2 13 169.98 39.5
 9 2 13 60.99 14.3
 8 -3 -13 581.44 58.49
 -8 3 13 558.64 70.89
 7 -3 -13 217.88 27.3
 7 -3 -13 200.08 22.9
 -7 3 13 192.18 33.3
 6 -3 -13 407.96 41
 6 -3 -13 394.46 44
 -6 3 13 415.16 42.2
 -6 3 13 388.16 50.29
 5 -3 -13 225.98 23.2
 5 -3 -13 171.18 19.7
 -5 3 13 210.88 21.6
 -5 3 13 162.08 27.6
 -5 3 13 180.58 32.3
 4 -3 -13 71.29 11.7
 4 -3 -13 67.69 9.2
 -4 3 13 84.09 11
 -4 3 13 93.19 21.8
 3 -3 -13 190.98 21.3
 3 -3 -13 173.38 18.8
 -3 3 13 178.48 18.2
 -3 3 13 194.78 20.6
 -3 3 13 213.58 31.5
 2 -3 -13 40.6 4.8
 2 -3 -13 38.4 7.9
 -2 3 13 47 14.6
 -2 3 13 45.9 6.9
 -2 3 13 34.4 4.8
 1 -3 -13 1885.71 179.08
 -1 3 13 1923.81 189.78
 -1 3 13 2047 178.68
 -1 3 13 1612.14 177.38
 0 -3 -13 199.58 20.1
 0 -3 -13 212.68 31.1
 0 3 13 161.18 18.7
 0 3 13 174.78 28.9
 0 3 13 188.68 19.5
 -1 -3 -13 2655.13 252.77
 -1 -3 -13 2827.72 254.57
 -1 -3 -13 2508.35 266.87
 1 3 13 2677.13 254.17
 1 3 13 2603.54 253.87
 -2 -3 -13 1142.19 106.29
 -2 -3 -13 1093.19 107.49
 -2 -3 -13 1145.09 123.09
 2 3 13 1059.49 107.19
 -3 -3 -13 833.02 83.39
 -3 -3 -13 1050.49 104.39
 -3 -3 -13 876.91 82.49
 3 3 13 809.02 82.49
 3 3 13 784.72 83.19
 -4 -3 -13 274.97 29.2
 -4 -3 -13 248.08 44.9
 -4 -3 -13 301.67 28.4
 4 3 13 276.57 29.1
 4 3 13 280.97 28.5
 -5 -3 -13 118.29 32.9
 -5 -3 -13 127.29 15
 5 3 13 120.39 15.1
 5 3 13 280.97 64.19
 5 3 13 156.98 16
 -6 -3 -13 3.2 3.2
 -6 -3 -13 5 14.5
 6 3 13 5.7 4
 6 3 13 -1.7 29.2
 6 3 13 9.5 17.3
 6 3 13 -0.4 3.3
 -7 -3 -13 -0.6 3.9
 -7 -3 -13 -5.4 16.5
 7 3 13 7.7 18.2
 7 3 13 1.7 4.6
 7 3 13 1.4 4.1
 -8 -3 -13 429.96 39.9
 8 3 13 317.57 40.4
 8 3 13 378.46 39.8
 -9 -3 -13 34.2 35.1
 -9 -3 -13 87.49 14.6
 -9 -3 -13 95.39 16.1
 9 3 13 177.58 38.8
 9 3 13 68.99 14.9
 9 3 13 92.79 15.1
 7 -4 -13 1088.59 99.99
 7 -4 -13 947.91 95.99
 -7 4 13 882.41 108.09
 -7 4 13 1023.6 97.49
 6 -4 -13 19.6 8.7
 6 -4 -13 19.3 6.7
 -6 4 13 12.5 6.2
 -6 4 13 15.8 11.7
 -6 4 13 18.9 15.6
 5 -4 -13 260.87 28.2
 5 -4 -13 295.87 31.7
 -5 4 13 252.27 38.2
 -5 4 13 273.77 43
 -5 4 13 306.97 30.5
 4 -4 -13 63.49 8.2
 4 -4 -13 72.39 11.7
 -4 4 13 56.79 16.6
 -4 4 13 60.69 6.9
 -4 4 13 73.29 10.5
 -4 4 13 75.89 21.7
 3 -4 -13 103.89 11.5
 3 -4 -13 115.39 16
 -3 4 13 108.69 11.1
 -3 4 13 97.09 23.6
 2 -4 -13 274.87 29.1
 2 -4 -13 309.17 31.9
 -2 4 13 258.97 40.4
 -2 4 13 330.17 29.6
 -2 4 13 320.37 31.2
 1 -4 -13 628.54 58.09
 1 -4 -13 569.64 60.19
 -1 4 13 610.24 59.79
 -1 4 13 597.54 70.59
 -1 4 13 595.84 58.69
 0 -4 -13 1732.63 165.28
 0 -4 -13 1637.94 176.98
 0 -4 -13 1922.51 163.58
 0 4 13 1769.02 165.08
 0 4 13 1476.85 163.98
 0 4 13 1713.83 176.78
 -1 -4 -13 2.8 1.8
 -1 -4 -13 2 8.5
 -1 -4 -13 3.9 3
 1 4 13 6.4 2.7
 1 4 13 1.8 7.4
 -2 -4 -13 2023.5 188.98
 -2 -4 -13 1723.73 189.98
 -2 -4 -13 2142.19 207.38
 2 4 13 2218.78 207.08
 2 4 13 1832.92 189.58
 -3 -4 -13 381.56 38
 -3 -4 -13 404.06 39.4
 -3 -4 -13 403.76 56.49
 3 4 13 352.16 38.5
 -4 -4 -13 660.33 70.39
 -4 -4 -13 623.74 87.59
 -4 -4 -13 810.42 69.69
 4 4 13 693.93 69.39
 4 4 13 730.53 70.29
 -5 -4 -13 267.47 51.99
 -5 -4 -13 385.46 34.5
 5 4 13 324.57 34.7
 5 4 13 330.57 34.4
 -6 -4 -13 3.8 17
 -6 -4 -13 2.7 3.6
 6 4 13 7.6 28.1
 6 4 13 1 4
 6 4 13 2.9 4.4
 6 4 13 17.7 17.6
 -7 -4 -13 152.58 16.1
 -7 -4 -13 59.39 29.3
 7 4 13 104.99 15.9
 7 4 13 209.58 41.6
 7 4 13 125.79 16.3
 -8 -4 -13 1.2 25.8
 -8 -4 -13 3.2 6.1
 8 4 13 0.3 7
 8 4 13 0.1 6.2
 8 4 13 7.6 19.9
 7 -5 -13 180.98 24.7
 7 -5 -13 129.29 18.3
 -7 5 13 150.78 21.2
 -7 5 13 149.19 39.1
 -7 5 13 124.89 41
 6 -5 -13 504.45 52.09
 -6 5 13 564.54 54.39
 -6 5 13 447.86 64.89
 -6 5 13 572.94 71.19
 5 -5 -13 9.1 7.2
 5 -5 -13 18 4.9
 -5 5 13 19 6.6
 -5 5 13 12 12
 -5 5 13 12.7 15.3
 4 -5 -13 63.09 8.1
 4 -5 -13 61.59 11.3
 -4 5 13 52.09 17.7
 -4 5 13 55.29 10.4
 -4 5 13 60.29 22.3
 -4 5 13 57.79 7.1
 3 -5 -13 65.89 11.2
 3 -5 -13 63.39 7.9
 -3 5 13 53.69 7.5
 -3 5 13 65.49 9.9
 -3 5 13 64.09 17.6
 -3 5 13 75.79 22.2
 2 -5 -13 445.16 50.99
 2 -5 -13 535.45 48.9
 2 -5 -13 498.05 49
 -2 5 13 505.95 49.3
 -2 5 13 548.95 50.99
 -2 5 13 458.05 61.69
 1 -5 -13 284.17 29
 1 -5 -13 272.17 30.9
 -1 5 13 316.37 42.6
 -1 5 13 309.17 30.7
 -1 5 13 283.67 29.4
 0 -5 -13 826.12 92.49
 0 -5 -13 981.5 91.39
 0 -5 -13 991 91.19
 0 -5 -13 964.4 105.59
 0 5 13 865.31 91.49
 0 5 13 998.8 92.79
 0 5 13 989.3 105.49
 -1 -5 -13 1298.87 108.59
 -1 -5 -13 1180.88 108.59
 -1 -5 -13 1101.89 123.19
 -1 -5 -13 985.3 109.49
 1 5 13 1043.4 108.79
 1 5 13 1102.99 122.79
 -2 -5 -13 167.48 17
 -2 -5 -13 135.69 18.2
 -2 -5 -13 161.08 32.6
 2 5 13 160.88 17.7
 2 5 13 166.88 33.2
 -3 -5 -13 1007.1 85.89
 -3 -5 -13 805.92 86.69
 -3 -5 -13 933.01 105.69
 3 5 13 775.82 86.09
 -4 -5 -13 106.89 12.2
 -4 -5 -13 97.69 29.9
 -4 -5 -13 73.89 12.9
 4 5 13 90.99 12.7
 4 5 13 163.48 46.7
 -5 -5 -13 554.14 58.29
 -5 -5 -13 513.15 77.49
 5 5 13 635.44 58.29
 5 5 13 578.84 57.29
 -6 -5 -13 8.1 19.1
 -6 -5 -13 2.7 4.6
 6 5 13 7 16.9
 6 5 13 -13.5 30.4
 6 5 13 1.2 4.6
 6 5 13 1.7 4.8
 -7 -5 -13 -2.6 21.3
 -7 -5 -13 8.2 5.8
 7 5 13 8.6 6.4
 7 5 13 6 6
 7 5 13 6.2 19.8
 -8 -5 -13 65.09 34.6
 -8 -5 -13 147.19 19.1
 8 5 13 100.09 18.2
 8 5 13 135.99 17.7
 6 -6 -13 84.49 11.8
 6 -6 -13 92.59 17.5
 -6 6 13 62.99 31.6
 -6 6 13 76.59 14.5
 -6 6 13 38.2 19.6
 5 -6 -13 219.28 28.4
 5 -6 -13 229.28 25.1
 -5 6 13 242.68 44.1
 -5 6 13 259.67 27.9
 -5 6 13 219.48 39.9
 4 -6 -13 -0.4 2.1
 4 -6 -13 8.7 3.8
 4 -6 -13 6.6 6.8
 -4 6 13 3.8 13.4
 -4 6 13 -0.5 10.5
 -4 6 13 5 3.1
 -4 6 13 7.3 5.9
 3 -6 -13 24.1 7.6
 3 -6 -13 22.9 4.1
 3 -6 -13 25.8 4.9
 -3 6 13 17.5 4.2
 -3 6 13 18 6.3
 -3 6 13 17.7 14.6
 -3 6 13 19.4 11.9
 2 -6 -13 23.6 7.5
 2 -6 -13 16.7 4.1
 2 -6 -13 13.4 3.4
 -2 6 13 10.8 10.2
 -2 6 13 16.5 5.7
 -2 6 13 20 12.7
 -2 6 13 9.5 3.8
 1 -6 -13 651.93 62.39
 1 -6 -13 606.84 64.29
 -1 6 13 568.34 62.69
 -1 6 13 690.53 77.89
 -1 6 13 702.43 64.49
 0 -6 -13 385.06 37.7
 0 -6 -13 344.27 39.2
 0 -6 -13 392.66 37.8
 0 6 13 409.76 52.89
 0 6 13 353.86 38
 -1 -6 -13 1162.08 134.59
 -1 -6 -13 1310.17 120.69
 -1 -6 -13 1353.16 120.49
 -1 -6 -13 1109.19 121.59
 1 6 13 1153.38 121.79
 1 6 13 1376.76 137.99
 -2 -6 -13 740.73 81.69
 -2 -6 -13 822.22 80.49
 -2 -6 -13 878.31 80.49
 -2 -6 -13 787.82 96.19
 2 6 13 999.4 103.19
 2 6 13 751.72 80.79
 -3 -6 -13 620.74 86.29
 -3 -6 -13 541.05 60.59
 -3 -6 -13 676.33 59.59
 3 6 13 552.94 59.79
 -4 -6 -13 911.41 79.59
 -4 -6 -13 782.02 99.99
 -4 -6 -13 703.33 80.39
 4 6 13 803.92 79.99
 -5 -6 -13 22.6 6.5
 -5 -6 -13 10 6.9
 -5 -6 -13 11 20
 5 6 13 36.4 36.7
 5 6 13 10.2 18.1
 5 6 13 4.1 5.7
 -6 -6 -13 56.09 10.3
 -6 -6 -13 34.9 9.6
 -6 -6 -13 31.7 25.7
 6 6 13 160.28 62.59
 6 6 13 39.9 10.2
 6 6 13 90.49 30.4
 -7 -6 -13 13.5 26.7
 -7 -6 -13 2.9 6.2
 7 6 13 17 22.8
 7 6 13 1.9 6.7
 6 -7 -13 124.39 15.5
 -6 7 13 115.89 42.2
 -6 7 13 63.29 30.4
 5 -7 -13 66.49 10.9
 5 -7 -13 60.19 14.5
 5 -7 -13 67.09 7.9
 -5 7 13 34.6 20.4
 -5 7 13 82.89 14.7
 -5 7 13 38 23
 4 -7 -13 151.58 16.3
 4 -7 -13 148.99 17.8
 4 -7 -13 138.09 21.3
 -4 7 13 195.18 21.2
 -4 7 13 135.79 16.8
 -4 7 13 159.78 36.1
 -4 7 13 170.78 34.5
 3 -7 -13 10.7 4.4
 3 -7 -13 9.6 7.1
 3 -7 -13 12 3.6
 -3 7 13 9.7 4.3
 -3 7 13 3.7 11
 -3 7 13 4.5 13.9
 -3 7 13 10.5 6.4
 2 -7 -13 71.29 9.1
 2 -7 -13 72.19 13
 2 -7 -13 54.59 8.5
 -2 7 13 68.39 9.4
 -2 7 13 54.49 20.3
 -2 7 13 62.99 11.9
 -2 7 13 69.39 24.4
 1 -7 -13 7.1 5.8
 1 -7 -13 10.7 4.3
 -1 7 13 7.7 4.8
 -1 7 13 8.7 3.9
 -1 7 13 2.8 9.8
 -1 7 13 6.4 13.5
 0 -7 -13 1031.6 92.59
 0 -7 -13 999 92.29
 0 -7 -13 828.82 93.79
 0 7 13 1007.6 109.69
 0 7 13 879.11 92.69
 0 7 13 929.91 104.59
 -1 -7 -13 102.89 12.7
 -1 -7 -13 100.69 14.8
 -1 -7 -13 99.29 26
 -1 -7 -13 101.79 12.9
 1 7 13 111.09 29.7
 1 7 13 107.69 13.6
 -2 -7 -13 2232.88 192.58
 -2 -7 -13 1807.22 193.78
 -2 -7 -13 2172.68 192.58
 2 7 13 1756.22 192.68
[truncated: 186,840 more chars]
