# Supplementary material for: Red Light Absorption of [ReI(CO)3(α-diimine)Cl] Complexes through Extension of the 4,4′-Bipyrimidine Ligand’s π-System
Source: Molecules. 2023 Feb 16;28(4):1905. doi: 10.3390/molecules28041905 (PMC9964139; doi:10.3390/molecules28041905)
Supplement: Supplementary file 1 [file molecules-28-01905-s001.zip › 3_ccdc_deposit_2225446.cif]

data_p21c_a
_audit_creation_date               2022-11-07
_audit_creation_method
;
Olex2 1.2-beta
(compiled 2018.05.29 svn.r3508 for OlexSys, GUI svn.r5506)
;
_shelx_SHELXL_version_number       '2015/1'
_audit_contact_author_address      ?
_audit_contact_author_email        ?
_audit_contact_author_name         ''
_audit_contact_author_phone        ?
_publ_contact_author_id_orcid      ?
_publ_section_references
;
Dolomanov, O.V., Bourhis, L.J., Gildea, R.J, Howard, J.A.K. & Puschmann, H.
 (2009), J. Appl. Cryst. 42, 339-341.

Sheldrick, G.M. (2015). Acta Cryst. A71, 3-8.

Sheldrick, G.M. (2015). Acta Cryst. C71, 3-8.
;
_chemical_name_common              ?
_chemical_name_systematic          ?
_chemical_formula_moiety           'C19 H8 Cl N4 O3 Re, C H Cl3'
_chemical_formula_sum              'C20 H9 Cl4 N4 O3 Re'
_chemical_formula_weight           681.31
_chemical_melting_point            ?
loop_
  _atom_type_symbol
  _atom_type_description
  _atom_type_scat_dispersion_real
  _atom_type_scat_dispersion_imag
  _atom_type_scat_source
 'C' 'C' 0.0033 0.0016 'International Tables Vol C Tables 4.2.6.8 and 6.1.1.4'
 'H' 'H' 0.0000 0.0000 'International Tables Vol C Tables 4.2.6.8 and 6.1.1.4'
 'Cl' 'Cl' 0.1484 0.1585 'International Tables Vol C Tables 4.2.6.8 and 6.1.1.4'
 'N' 'N' 0.0061 0.0033 'International Tables Vol C Tables 4.2.6.8 and 6.1.1.4'
 'O' 'O' 0.0106 0.0060 'International Tables Vol C Tables 4.2.6.8 and 6.1.1.4'
 'Re' 'Re' -1.0185 7.2310
 'International Tables Vol C Tables 4.2.6.8 and 6.1.1.4'

_shelx_space_group_comment
;
The symmetry employed for this shelxl refinement is uniquely defined
by the following loop, which should always be used as a source of
symmetry information in preference to the above space-group names.
They are only intended as comments.
;
_space_group_crystal_system        'monoclinic'
_space_group_IT_number             14
_space_group_name_H-M_alt          'P 1 21/c 1'
_space_group_name_Hall             '-P 2ybc'
loop_
  _space_group_symop_operation_xyz
 'x+, y+, z+'
 '-x+, y+1/2, -z+1/2'
 '-x+, -y+, -z+'
 'x+, -y-1/2, z-1/2'

_cell_length_a                     6.2686(4)
_cell_length_b                     18.5609(13)
_cell_length_c                     18.7584(13)
_cell_angle_alpha                  90
_cell_angle_beta                   99.606(3)
_cell_angle_gamma                  90
_cell_volume                       2152.0(3)
_cell_formula_units_Z              4
_cell_measurement_reflns_used      9975
_cell_measurement_temperature      150(2)
_cell_measurement_theta_max        27.610
_cell_measurement_theta_min        2.455
_shelx_estimated_absorpt_T_max     ?
_shelx_estimated_absorpt_T_min     ?
_exptl_absorpt_coefficient_mu      6.176
_exptl_absorpt_correction_T_max    0.7456
_exptl_absorpt_correction_T_min    0.5410
_exptl_absorpt_correction_type     multi-scan
_exptl_absorpt_process_details    
 'SADABS-2016/2 (Bruker,2016/2) was used for absorption correction. wR2(int) was 0.1812 before and 0.1060 after correction. The Ratio of minimum to maximum transmission is 0.7256. The \l/2 correction factor is Not present.'
_exptl_absorpt_special_details     ?
_exptl_crystal_colour              'clear dark violet'
_exptl_crystal_colour_lustre       clear
_exptl_crystal_colour_modifier     dark
_exptl_crystal_colour_primary      violet
_exptl_crystal_density_diffrn      2.103
_exptl_crystal_density_meas        ?
_exptl_crystal_density_method      ?
_exptl_crystal_description         block
_exptl_crystal_F_000               1296
_exptl_crystal_size_max            0.103
_exptl_crystal_size_mid            0.079
_exptl_crystal_size_min            0.078
_exptl_transmission_factor_max     ?
_exptl_transmission_factor_min     ?
_diffrn_reflns_av_R_equivalents    0.1610
_diffrn_reflns_av_unetI/netI       0.0897
_diffrn_reflns_Laue_measured_fraction_full  0.997
_diffrn_reflns_Laue_measured_fraction_max  0.990
_diffrn_reflns_limit_h_max         8
_diffrn_reflns_limit_h_min         -8
_diffrn_reflns_limit_k_max         23
_diffrn_reflns_limit_k_min         -24
_diffrn_reflns_limit_l_max         24
_diffrn_reflns_limit_l_min         -24
_diffrn_reflns_number              33758
_diffrn_reflns_point_group_measured_fraction_full  0.997
_diffrn_reflns_point_group_measured_fraction_max  0.990
_diffrn_reflns_theta_full          25.242
_diffrn_reflns_theta_max           27.624
_diffrn_reflns_theta_min           2.194
_diffrn_ambient_temperature        150.0
_diffrn_detector_area_resol_mean   8
_diffrn_measured_fraction_theta_full  0.997
_diffrn_measured_fraction_theta_max  0.990
_diffrn_measurement_device_type    'Bruker SMART APEX CCD area detector'
_diffrn_measurement_method         '\w and \f scans'
_diffrn_radiation_monochromator    graphite
_diffrn_radiation_type             MoK\a
_diffrn_radiation_wavelength       0.71073
_diffrn_source                     'sealed tube'
_diffrn_standards_number           0
_reflns_Friedel_coverage           0.000
_reflns_Friedel_fraction_full      .
_reflns_Friedel_fraction_max       .
_reflns_number_gt                  3750
_reflns_number_total               4971
_reflns_special_details
;
 Reflections were merged by SHELXL according to the crystal
 class for the calculation of statistics and refinement.
 
 _reflns_Friedel_fraction is defined as the number of unique
 Friedel pairs measured divided by the number that would be
 possible theoretically, ignoring centric projections and
 systematic absences.
;
_reflns_threshold_expression       'I > 2\s(I)'
_computing_cell_refinement         'SAINT v8.37A (Bruker, 2015)'
_computing_data_collection         ?
_computing_data_reduction          'SAINT v8.37A (Bruker, 2015)'
_computing_molecular_graphics      'Olex2 (Dolomanov et al., 2009)'
_computing_publication_material    'Olex2 (Dolomanov et al., 2009)'
_computing_structure_refinement    'ShelXL (Sheldrick, 2015)'
_computing_structure_solution      'ShelXT (Sheldrick, 2015)'
_refine_diff_density_max           2.010
_refine_diff_density_min           -1.536
_refine_diff_density_rms           0.256
_refine_ls_extinction_coef         .
_refine_ls_extinction_method       none
_refine_ls_goodness_of_fit_ref     1.033
_refine_ls_hydrogen_treatment      constr
_refine_ls_matrix_type             full
_refine_ls_number_parameters       289
_refine_ls_number_reflns           4971
_refine_ls_number_restraints       0
_refine_ls_R_factor_all            0.0726
_refine_ls_R_factor_gt             0.0503
_refine_ls_restrained_S_all        1.033
_refine_ls_shift/su_max            0.001
_refine_ls_shift/su_mean           0.000
_refine_ls_structure_factor_coef   Fsqd
_refine_ls_weighting_details      
 'w=1/[\s^2^(Fo^2^)+(0.0629P)^2^] where P=(Fo^2^+2Fc^2^)/3'
_refine_ls_weighting_scheme        calc
_refine_ls_wR_factor_gt            0.1224
_refine_ls_wR_factor_ref           0.1363
_refine_special_details            ?
_olex2_refinement_description
;
1. Fixed Uiso
 At 1.2 times of:
  All C(H) groups
2.a Ternary CH refined with riding coordinates:
 C00V(H00V)
2.b Aromatic/amide H refined with riding coordinates:
 C00H(H00H), C00I(H00I), C00N(H00N), C00Q(H00Q), C00R(H00R), C00S(H00S),
 C00T(H00T), C00W(H00W)
;
_atom_sites_solution_hydrogens     geom
_atom_sites_solution_primary       dual
_atom_sites_solution_secondary     ?
loop_
  _atom_site_label
  _atom_site_type_symbol
  _atom_site_fract_x
  _atom_site_fract_y
  _atom_site_fract_z
  _atom_site_U_iso_or_equiv
  _atom_site_adp_type
  _atom_site_occupancy
  _atom_site_site_symmetry_order
  _atom_site_calc_flag
  _atom_site_refinement_flags_posn
  _atom_site_refinement_flags_adp
  _atom_site_refinement_flags_occupancy
  _atom_site_disorder_assembly
  _atom_site_disorder_group
 Re01 Re 0.52786(4) 0.60246(2) 0.35866(2) 0.01867(12) Uani 1 1 d . . . . .
 C0C C 0.9076(11) 0.6849(5) 0.5582(4) 0.0213(16) Uani 1 1 d . . . . .
 Cl02 Cl 0.6922(3) 0.70806(12) 0.30821(11) 0.0266(4) Uani 1 1 d . . . . .
 Cl03 Cl -0.2200(6) 0.8998(2) 0.2572(2) 0.0652(9) Uani 1 1 d . . . . .
 Cl04 Cl -0.0148(7) 0.9604(2) 0.3915(2) 0.0772(11) Uani 1 1 d . . . . .
 Cl5 Cl -0.4525(7) 0.8993(2) 0.3753(3) 0.1018(18) Uani 1 1 d . . . . .
 O006 O 0.3404(9) 0.4692(3) 0.4215(4) 0.0288(13) Uani 1 1 d . . . . .
 N007 N 0.7859(10) 0.6169(4) 0.4492(4) 0.0208(14) Uani 1 1 d . . . . .
 N008 N 1.1294(11) 0.5897(4) 0.5222(4) 0.0258(15) Uani 1 1 d . . . . .
 N009 N 0.4115(10) 0.6860(4) 0.4243(3) 0.0229(14) Uani 1 1 d . . . . .
 O00A O 0.7651(12) 0.4984(5) 0.2721(5) 0.049(2) Uani 1 1 d . . . . .
 N00B N 0.1737(10) 0.7791(4) 0.4488(4) 0.0254(15) Uani 1 1 d . . . . .
 O00D O 0.1315(10) 0.5944(4) 0.2391(4) 0.0369(16) Uani 1 1 d . . . . .
 C00E C 0.5179(11) 0.7646(4) 0.5267(4) 0.0193(15) Uani 1 1 d . . . . .
 C00F C 0.4112(12) 0.5210(5) 0.4001(4) 0.0240(17) Uani 1 1 d . . . . .
 C00G C 1.0987(12) 0.6414(5) 0.5685(4) 0.0249(17) Uani 1 1 d . . . . .
 C00H C 1.0237(14) 0.7503(5) 0.6656(5) 0.0311(19) Uani 1 1 d . . . . .
 H00H H 1.0017 0.7861 0.6999 0.037 Uiso 1 1 calc R . . . .
 C00I C 0.9752(12) 0.5801(5) 0.4654(5) 0.0264(18) Uani 1 1 d . . . . .
 H00I H 0.9998 0.5435 0.4323 0.032 Uiso 1 1 calc R . . . .
 C00J C 0.8712(13) 0.7407(5) 0.6057(4) 0.0234(16) Uani 1 1 d . . . . .
 C00K C 0.2808(13) 0.5989(5) 0.2827(5) 0.0259(17) Uani 1 1 d . . . . .
 C00L C 0.3199(12) 0.8017(5) 0.5070(5) 0.0262(17) Uani 1 1 d . . . . .
 C00M C 0.7581(11) 0.6683(5) 0.4960(4) 0.0217(16) Uani 1 1 d . . . . .
 C00N C 0.2221(12) 0.7248(5) 0.4115(5) 0.0263(18) Uani 1 1 d . . . . .
 H00N H 0.1171 0.7102 0.3716 0.032 Uiso 1 1 calc R . . . .
 C00O C 0.5558(11) 0.7077(5) 0.4824(4) 0.0228(17) Uani 1 1 d . . . . .
 C00P C 0.6742(12) 0.7851(5) 0.5874(4) 0.0243(17) Uani 1 1 d . . . . .
 C00Q C 0.6273(15) 0.8442(5) 0.6251(5) 0.034(2) Uani 1 1 d . . . . .
 H00Q H 0.7282 0.8594 0.6658 0.041 Uiso 1 1 calc R . . . .
 C00R C 1.2541(12) 0.6554(6) 0.6318(5) 0.032(2) Uani 1 1 d . . . . .
 H00R H 1.3837 0.6280 0.6411 0.038 Uiso 1 1 calc R . . . .
 C00S C 0.2805(14) 0.8626(5) 0.5484(5) 0.0305(19) Uani 1 1 d . . . . .
 H00S H 0.1491 0.8888 0.5368 0.037 Uiso 1 1 calc R . . . .
 C00T C 1.2169(13) 0.7076(5) 0.6782(5) 0.032(2) Uani 1 1 d . . . . .
 H00T H 1.3212 0.7163 0.7202 0.039 Uiso 1 1 calc R . . . .
 C00U C 0.6741(13) 0.5372(5) 0.3044(5) 0.0300(19) Uani 1 1 d . . . . .
 C00V C -0.1914(18) 0.8939(6) 0.3531(7) 0.047(3) Uani 1 1 d . . . . .
 H00V H -0.1283 0.8459 0.3688 0.056 Uiso 1 1 calc R . . . .
 C00W C 0.4340(16) 0.8833(5) 0.6055(5) 0.034(2) Uani 1 1 d . . . . .
 H00W H 0.4095 0.9249 0.6325 0.041 Uiso 1 1 calc R . . . .

loop_
  _atom_site_aniso_label
  _atom_site_aniso_U_11
  _atom_site_aniso_U_22
  _atom_site_aniso_U_33
  _atom_site_aniso_U_23
  _atom_site_aniso_U_13
  _atom_site_aniso_U_12
 Re01 0.01770(16) 0.01793(19) 0.02030(18) -0.00041(12) 0.00296(11) -0.00052(11)
 C0C 0.019(3) 0.021(5) 0.023(4) 0.004(3) 0.003(3) -0.004(3)
 Cl02 0.0271(9) 0.0265(12) 0.0260(10) 0.0042(8) 0.0037(7) -0.0049(8)
 Cl03 0.075(2) 0.059(2) 0.062(2) 0.0043(16) 0.0096(16) -0.0097(17)
 Cl04 0.093(2) 0.051(2) 0.075(2) 0.0031(17) -0.022(2) 0.0060(19)
 Cl5 0.096(3) 0.069(3) 0.162(5) 0.032(3) 0.086(3) 0.022(2)
 O006 0.028(3) 0.019(3) 0.042(4) 0.002(3) 0.013(2) 0.000(2)
 N007 0.017(3) 0.021(4) 0.023(3) 0.006(3) -0.001(2) 0.001(2)
 N008 0.024(3) 0.020(4) 0.033(4) 0.004(3) 0.002(3) 0.004(3)
 N009 0.019(3) 0.029(4) 0.021(3) -0.002(3) 0.006(2) 0.000(3)
 O00A 0.050(4) 0.043(5) 0.064(5) -0.019(4) 0.035(4) 0.003(4)
 N00B 0.022(3) 0.028(4) 0.025(4) 0.000(3) 0.000(3) 0.005(3)
 O00D 0.033(3) 0.035(4) 0.036(4) 0.002(3) -0.013(3) -0.001(3)
 C00E 0.019(3) 0.018(4) 0.022(4) -0.001(3) 0.006(3) -0.002(3)
 C00F 0.020(3) 0.031(5) 0.020(4) 0.000(3) 0.003(3) 0.007(3)
 C00G 0.020(3) 0.030(5) 0.024(4) 0.011(3) 0.003(3) -0.002(3)
 C00H 0.038(4) 0.033(5) 0.022(4) -0.005(4) 0.001(3) -0.003(4)
 C00I 0.022(3) 0.029(5) 0.030(4) 0.001(3) 0.009(3) 0.004(3)
 C00J 0.029(4) 0.015(4) 0.026(4) 0.001(3) 0.007(3) -0.003(3)
 C00K 0.027(4) 0.023(5) 0.028(4) 0.003(3) 0.005(3) 0.001(3)
 C00L 0.027(4) 0.019(4) 0.032(4) 0.001(3) 0.003(3) 0.004(3)
 C00M 0.021(3) 0.027(5) 0.017(4) 0.004(3) 0.004(3) 0.004(3)
 C00N 0.018(3) 0.031(5) 0.029(4) 0.012(3) 0.002(3) 0.008(3)
 C00O 0.015(3) 0.028(5) 0.025(4) -0.005(3) 0.004(3) -0.003(3)
 C00P 0.027(4) 0.025(5) 0.023(4) 0.002(3) 0.008(3) -0.003(3)
 C00Q 0.047(5) 0.028(5) 0.025(4) -0.006(4) 0.001(4) 0.004(4)
 C00R 0.016(3) 0.045(6) 0.034(5) 0.006(4) 0.000(3) -0.002(3)
 C00S 0.042(5) 0.024(5) 0.027(4) -0.001(4) 0.010(3) 0.009(4)
 C00T 0.026(4) 0.038(6) 0.028(4) 0.001(4) -0.011(3) -0.006(4)
 C00U 0.023(4) 0.034(5) 0.035(5) -0.008(4) 0.012(3) -0.006(3)
 C00V 0.053(6) 0.027(6) 0.059(7) -0.002(5) 0.002(5) 0.012(5)
 C00W 0.046(5) 0.030(6) 0.029(5) -0.008(4) 0.011(4) 0.008(4)

_geom_special_details
;
 All esds (except the esd in the dihedral angle between two l.s. planes)
 are estimated using the full covariance matrix.  The cell esds are taken
 into account individually in the estimation of esds in distances, angles
 and torsion angles; correlations between esds in cell parameters are only
 used when they are defined by crystal symmetry.  An approximate (isotropic)
 treatment of cell esds is used for estimating esds involving l.s. planes.
;
loop_
  _geom_bond_atom_site_label_1
  _geom_bond_atom_site_label_2
  _geom_bond_distance
  _geom_bond_site_symmetry_2
  _geom_bond_publ_flag
 Re01 Cl02 2.475(2) . ?
 Re01 N007 2.158(6) . ?
 Re01 N009 2.180(7) . ?
 Re01 C00F 1.902(9) . ?
 Re01 C00K 1.922(8) . ?
 Re01 C00U 1.912(9) . ?
 C0C C00G 1.431(11) . ?
 C0C C00J 1.409(12) . ?
 C0C C00M 1.403(10) . ?
 Cl03 C00V 1.781(13) . ?
 Cl04 C00V 1.731(12) . ?
 Cl5 C00V 1.758(12) . ?
 O006 C00F 1.157(11) . ?
 N007 C00I 1.359(10) . ?
 N007 C00M 1.328(11) . ?
 N008 C00G 1.329(12) . ?
 N008 C00I 1.326(11) . ?
 N009 C00N 1.374(10) . ?
 N009 C00O 1.357(10) . ?
 O00A C00U 1.151(11) . ?
 N00B C00L 1.370(10) . ?
 N00B C00N 1.292(12) . ?
 O00D C00K 1.139(10) . ?
 C00E C00L 1.414(10) . ?
 C00E C00O 1.388(11) . ?
 C00E C00P 1.425(11) . ?
 C00G C00R 1.428(11) . ?
 C00H H00H 0.9500 . ?
 C00H C00J 1.361(12) . ?
 C00H C00T 1.433(13) . ?
 C00I H00I 0.9500 . ?
 C00J C00P 1.477(11) . ?
 C00L C00S 1.416(12) . ?
 C00M C00O 1.449(10) . ?
 C00N H00N 0.9500 . ?
 C00P C00Q 1.363(13) . ?
 C00Q H00Q 0.9500 . ?
 C00Q C00W 1.408(13) . ?
 C00R H00R 0.9500 . ?
 C00R C00T 1.349(14) . ?
 C00S H00S 0.9500 . ?
 C00S C00W 1.370(13) . ?
 C00T H00T 0.9500 . ?
 C00V H00V 1.0000 . ?
 C00W H00W 0.9500 . ?

loop_
  _geom_angle_atom_site_label_1
  _geom_angle_atom_site_label_2
  _geom_angle_atom_site_label_3
  _geom_angle
  _geom_angle_site_symmetry_1
  _geom_angle_site_symmetry_3
  _geom_angle_publ_flag
 N007 Re01 Cl02 84.10(19) . . ?
 N007 Re01 N009 75.2(2) . . ?
 N009 Re01 Cl02 81.50(19) . . ?
 C00F Re01 Cl02 177.8(2) . . ?
 C00F Re01 N007 93.8(3) . . ?
 C00F Re01 N009 98.5(3) . . ?
 C00F Re01 C00K 87.6(3) . . ?
 C00F Re01 C00U 88.0(4) . . ?
 C00K Re01 Cl02 94.5(3) . . ?
 C00K Re01 N007 173.2(3) . . ?
 C00K Re01 N009 98.0(3) . . ?
 C00U Re01 Cl02 91.7(3) . . ?
 C00U Re01 N007 97.7(3) . . ?
 C00U Re01 N009 170.6(3) . . ?
 C00U Re01 C00K 89.0(4) . . ?
 C00J C0C C00G 123.4(7) . . ?
 C00M C0C C00G 114.6(7) . . ?
 C00M C0C C00J 122.0(7) . . ?
 C00I N007 Re01 128.7(6) . . ?
 C00M N007 Re01 116.5(5) . . ?
 C00M N007 C00I 114.8(7) . . ?
 C00I N008 C00G 117.2(7) . . ?
 C00N N009 Re01 129.4(6) . . ?
 C00O N009 Re01 115.1(5) . . ?
 C00O N009 C00N 115.2(7) . . ?
 C00N N00B C00L 119.0(7) . . ?
 C00L C00E C00P 122.3(7) . . ?
 C00O C00E C00L 116.4(7) . . ?
 C00O C00E C00P 121.2(7) . . ?
 O006 C00F Re01 175.9(7) . . ?
 N008 C00G C0C 121.9(7) . . ?
 N008 C00G C00R 121.4(8) . . ?
 C00R C00G C0C 116.7(8) . . ?
 C00J C00H H00H 119.3 . . ?
 C00J C00H C00T 121.4(8) . . ?
 C00T C00H H00H 119.3 . . ?
 N007 C00I H00I 116.4 . . ?
 N008 C00I N007 127.2(8) . . ?
 N008 C00I H00I 116.4 . . ?
 C0C C00J C00P 118.7(7) . . ?
 C00H C00J C0C 116.9(8) . . ?
 C00H C00J C00P 124.3(8) . . ?
 O00D C00K Re01 177.2(8) . . ?
 N00B C00L C00E 120.0(8) . . ?
 N00B C00L C00S 121.9(7) . . ?
 C00E C00L C00S 118.2(7) . . ?
 C0C C00M C00O 118.6(7) . . ?
 N007 C00M C0C 124.4(7) . . ?
 N007 C00M C00O 117.0(7) . . ?
 N009 C00N H00N 117.0 . . ?
 N00B C00N N009 126.0(8) . . ?
 N00B C00N H00N 117.0 . . ?
 N009 C00O C00E 123.3(7) . . ?
 N009 C00O C00M 116.0(7) . . ?
 C00E C00O C00M 120.7(7) . . ?
 C00E C00P C00J 118.3(8) . . ?
 C00Q C00P C00E 116.8(8) . . ?
 C00Q C00P C00J 124.9(8) . . ?
 C00P C00Q H00Q 119.0 . . ?
 C00P C00Q C00W 122.1(8) . . ?
 C00W C00Q H00Q 119.0 . . ?
 C00G C00R H00R 120.0 . . ?
 C00T C00R C00G 120.0(8) . . ?
 C00T C00R H00R 120.0 . . ?
 C00L C00S H00S 120.4 . . ?
 C00W C00S C00L 119.2(8) . . ?
 C00W C00S H00S 120.4 . . ?
 C00H C00T H00T 119.2 . . ?
 C00R C00T C00H 121.5(7) . . ?
 C00R C00T H00T 119.2 . . ?
 O00A C00U Re01 179.0(8) . . ?
 Cl03 C00V H00V 108.6 . . ?
 Cl04 C00V Cl03 109.0(7) . . ?
 Cl04 C00V Cl5 114.7(7) . . ?
 Cl04 C00V H00V 108.6 . . ?
 Cl5 C00V Cl03 107.1(6) . . ?
 Cl5 C00V H00V 108.6 . . ?
 C00Q C00W H00W 119.3 . . ?
 C00S C00W C00Q 121.4(9) . . ?
 C00S C00W H00W 119.3 . . ?

loop_
  _refln_index_h
  _refln_index_k
  _refln_index_l
  _refln_F_squared_meas
  _refln_F_squared_sigma
 1 0 -1 0.3 3.6
 1 0 -1 0 1.2
 1 0 -1 8.1 7.9
 -1 0 1 0.6 1.1
 -1 0 1 1.6 6.8
 -1 0 1 2 3.7
 2 0 -2 49.7 18.9
 2 0 -2 23.3 8.9
 -2 0 2 24 10.3
 -2 0 2 33 6.6
 -2 0 2 32.5 19.3
 2 0 -2 31.8 6.6
 -3 0 3 11.6 5.4
 3 0 -3 -17.5 37.2
 3 0 -3 103.09 23.4
 4 0 -4 290.47 42.7
 -4 0 4 329.87 56.29
 -4 0 4 312.47 61.09
 -5 0 5 16.1 31.1
 5 0 -5 -34.9 45.8
 5 0 -5 9.4 32.6
 -5 0 5 7.9 23.5
 5 0 -5 0.5 7.3
 6 0 -6 1150.38 145.29
 -6 0 6 931.01 162.58
 -6 0 6 1134.39 165.78
 6 0 -6 1071.89 183.48
 7 0 -7 -25.5 19.7
 7 0 -7 9.7 60.39
 -7 0 7 14.4 30.1
 -7 0 7 4.9 37.8
 7 0 -7 -0.8 11.5
 -8 0 8 31.5 44.8
 8 0 -8 7.5 15.4
 8 0 -8 25.9 17.7
 -8 0 8 43.4 42.4
 8 0 -8 106.69 72.19
 -1 1 1 981.9 123.99
 -1 1 1 1007.8 123.49
 1 1 -1 789.82 125.89
 1 1 -1 875.81 121.59
 1 1 -1 1042.4 122.49
 -1 -1 1 898.91 126.49
 -1 -1 1 1034.5 122.69
 1 -1 -1 1002.7 123.19
 -1 -1 1 943.91 121.59
 1 -1 -1 841.02 123.89
 -2 1 2 360.46 66.59
 2 1 -2 512.05 62.69
 2 1 -2 494.85 60.59
 -2 -1 2 447.76 59.89
 2 -1 -2 467.85 59.99
 -2 -1 2 477.85 64.19
 -2 -1 2 352.66 70.89
 2 -1 -2 408.66 67.89
 2 -1 -2 487.05 63.39
 3 1 -3 599.44 88.79
 3 1 -3 804.52 113.69
 -3 1 3 484.45 98.79
 3 1 -3 701.33 84.79
 -3 -1 3 848.22 110.59
 3 -1 -3 667.03 88.99
 -3 -1 3 626.14 83.69
 3 -1 -3 571.64 107.39
 3 -1 -3 598.34 83.69
 -3 -1 3 645.44 93.09
 4 1 -4 149.09 25.9
 -4 1 4 176.48 43.3
 -4 1 4 192.88 45.2
 4 1 -4 156.78 54.29
 -4 -1 4 200.78 51.29
 4 -1 -4 169.98 34
 -4 -1 4 157.78 24
 -4 -1 4 154.98 40.6
 4 -1 -4 155.18 24.9
 5 1 -5 223.98 31.4
 -5 1 5 209.28 54.39
 5 1 -5 175.38 66.59
 5 1 -5 57.09 50.09
 -5 1 5 209.08 49.8
 -5 -1 5 223.48 49.4
 5 -1 -5 211.48 65.69
 5 -1 -5 184.48 28.6
 -5 -1 5 179.08 51.59
 5 -1 -5 100.49 44.3
 6 1 -6 47.1 15.3
 6 1 -6 29.4 23.3
 -6 1 6 13.2 29.5
 6 1 -6 41.9 57.49
 -6 1 6 51.79 36.6
 6 -1 -6 36.1 27.7
 -6 -1 6 42.3 39.8
 6 -1 -6 0.6 50.19
 6 -1 -6 60.29 15
 -6 -1 6 98.89 41.2
 7 1 -7 -8.7 11.9
 -7 1 7 64.09 41.9
 7 1 -7 24.3 21.5
 7 1 -7 -36.6 62.19
 -7 1 7 34.6 33
 7 -1 -7 -55.79 51.39
 7 -1 -7 9.2 12.1
 7 -1 -7 2 24.8
 -7 -1 7 -4.1 31.6
 -7 -1 7 82.19 43.9
 -8 1 8 75.79 47.2
 8 1 -8 90.99 71.99
 -8 1 8 89.59 44.9
 8 1 -8 32.9 21.2
 8 -1 -8 4 14.2
 -8 -1 8 22.8 44.1
 8 -1 -8 39.5 19
 -8 -1 8 42.1 43.1
 8 -1 -8 82.69 83.59
 0 2 0 4.5 2.1
 0 2 0 3.5 5
 0 -2 0 6.2 5.4
 0 -2 0 7.8 2.5
 -1 2 1 3989.7 505.25
 -1 2 1 3882.91 505.55
 1 2 -1 4016.3 504.15
 -1 -2 1 3195.88 508.65
 1 -2 -1 3953.9 505.65
 -1 -2 1 3723.43 503.85
 -1 -2 1 4487.85 504.25
 1 -2 -1 4235.38 505.35
 -2 2 2 92.19 23.6
 -2 2 2 113.69 23.4
 2 2 -2 87.09 29.3
 2 2 -2 114.09 19.5
 2 2 -2 94.49 18.1
 2 -2 -2 81.29 21.1
 -2 -2 2 101.89 15.6
 2 -2 -2 97.49 25.2
 -2 -2 2 129.49 21.7
 -3 2 3 3.6 27.3
 3 2 -3 61.69 12.9
 3 2 -3 13.4 41.4
 -3 -2 3 42.2 9.8
 3 -2 -3 39.3 35.4
 3 -2 -3 60.79 10.8
 3 -2 -3 48.3 16.1
 4 2 -4 18.1 37
 4 2 -4 16.2 8.6
 -4 2 4 18.7 19.1
 -4 2 4 -8.2 22.6
 -4 -2 4 17.7 28.2
 4 -2 -4 18.4 15.5
 4 -2 -4 15.7 6.7
 4 -2 -4 37.1 29.6
 -4 -2 4 10.6 16.6
 4 -2 -4 14 32.6
 -4 -2 4 18.9 6.5
 5 2 -5 682.23 99.79
 5 2 -5 614.24 137.19
 -5 2 5 799.92 117.89
 -5 2 5 809.72 117.69
 5 -2 -5 727.33 98.49
 -5 -2 5 598.24 122.79
 5 -2 -5 561.24 129.79
 -5 -2 5 813.02 98.09
 -5 -2 5 824.92 116.39
 6 2 -6 57.79 61.89
 -6 2 6 95.19 40.8
 6 2 -6 37 23.5
 -6 2 6 60.09 36.9
 6 2 -6 95.49 21.1
 -6 -2 6 125.59 51.39
 6 -2 -6 132.79 22
 6 -2 -6 75.39 35
 -6 -2 6 133.59 42.7
 6 -2 -6 75.39 56.49
 7 2 -7 280.77 97.29
 -7 2 7 303.57 71.19
 7 2 -7 240.08 43.1
 -7 2 7 240.28 63.19
 7 2 -7 286.27 48.4
 -7 -2 7 367.96 85.49
 7 -2 -7 151.38 52.59
 7 -2 -7 317.57 44.2
 7 -2 -7 240.98 91.29
 -7 -2 7 395.36 80.49
 -8 2 8 52.69 40.8
 8 2 -8 -28.6 16.5
 -8 -2 8 19.1 71.89
 8 -2 -8 16.7 15.5
 0 3 0 3.5 8.8
 0 3 0 4.4 3.1
 0 -3 0 -0.3 2.3
 0 -3 0 -1.5 6.9
 -1 3 1 196.98 27.8
 -1 3 1 177.28 29.3
 -1 -3 1 180.58 27.3
 1 -3 -1 183.48 28.6
 1 -3 -1 173.48 27.9
 -1 -3 1 222.68 26.3
 2 3 -2 3444.76 548.55
 -2 3 2 4368.26 543.65
 -2 3 2 4176.68 542.65
 2 3 -2 4520.65 539.65
 -2 -3 2 4271.67 550.84
 -2 -3 2 3865.61 539.45
 2 -3 -2 4246.18 541.95
 -2 -3 2 4729.23 541.55
 3 3 -3 17.5 43.2
 3 -3 -3 99.29 35.5
 3 -3 -3 26.2 39.2
 3 -3 -3 28.3 7.6
 -3 -3 3 -4.9 38.2
 -3 -3 3 3.5 15.2
 -3 -3 3 21.7 7.7
 3 -3 -3 33.3 15.1
 4 3 -4 1001.3 189.68
 4 3 -4 1275.27 168.98
 -4 3 4 1238.18 177.98
 -4 3 4 1283.77 178.18
 -4 -3 4 1438.26 191.58
 4 -3 -4 1426.06 173.78
 4 -3 -4 1230.88 186.08
 4 -3 -4 1291.57 167.38
 -4 -3 4 1364.26 177.18
 -4 -3 4 1264.67 167.28
 -5 3 5 173.08 47.5
 5 3 -5 139.69 63.09
 5 3 -5 140.89 31.4
 -5 3 5 302.37 59.09
 5 -3 -5 147.29 26.3
 5 -3 -5 237.98 64.59
 -5 -3 5 207.88 58.09
 -5 -3 5 149.59 25.8
 -5 -3 5 153.58 42.5
 6 3 -6 11.3 8.2
 -6 3 6 -4.8 28.9
 6 3 -6 1.6 15
 6 3 -6 -11.4 10.6
 6 3 -6 -37.9 50.39
 -6 3 6 -19.3 23.2
 -6 -3 6 -36.8 34.4
 6 -3 -6 47.7 52.49
 6 -3 -6 -14.1 29.5
 6 -3 -6 19 9.8
 7 3 -7 -60.69 54.89
 -7 3 7 8.9 29
 -7 3 7 11.1 32.9
 7 3 -7 -20.6 12.7
 7 -3 -7 -27.4 26.4
 7 -3 -7 52.19 57.09
 -7 -3 7 29.5 42.1
 -7 -3 7 53.49 40.9
 7 -3 -7 20.9 11.4
 0 -4 0 2023.7 265.27
 -1 4 1 101.59 29.1
 -1 4 1 116.29 27.1
 1 -4 -1 136.99 27.8
 -1 -4 1 170.08 21
 2 4 -2 587.44 95.69
 -2 4 2 684.23 99.79
 -2 -4 2 758.02 94.89
 -2 -4 2 655.73 115.19
 2 -4 -2 803.72 101.59
 -2 -4 2 873.81 96.89
 2 -4 -2 718.53 97.99
 3 4 -3 117.69 22.3
 3 -4 -3 53.09 21.5
 -4 4 4 259.17 47.4
 4 4 -4 167.08 28.7
 -4 4 4 251.57 51.19
 4 4 -4 127.79 30.6
 -4 -4 4 176.58 43.3
 4 -4 -4 266.07 63.19
 4 -4 -4 138.69 51.69
 -4 -4 4 182.08 58.59
 4 -4 -4 203.48 37.7
 -4 -4 4 171.68 27.2
 4 -4 -4 189.38 26.9
 -5 4 5 110.59 38.7
 -5 4 5 85.29 33.1
 5 4 -5 108.09 24
 5 4 -5 150.38 23.3
 5 4 -5 106.39 57.39
 -5 -4 5 144.59 22.3
 -5 -4 5 159.88 61.89
 5 -4 -5 134.89 54.29
 -5 -4 5 156.68 41.8
 5 -4 -5 32 40.9
 5 -4 -5 143.89 22.6
 -6 4 6 806.42 121.99
 6 4 -6 504.25 142.59
 -6 4 6 667.93 123.99
 6 -4 -6 763.72 103.19
 -6 -4 6 863.31 102.69
 -6 -4 6 748.03 123.69
 -6 -4 6 847.02 136.49
 6 -4 -6 622.44 139.29
 -7 4 7 242.18 62.19
 -7 4 7 241.48 57.49
 -7 -4 7 275.47 71.09
 7 -4 -7 193.18 33.6
 7 -4 -7 135.89 74.19
 -7 -4 7 254.37 61.49
 7 -4 -7 91.59 46.5
 0 5 0 159.28 28.8
 0 -5 0 229.48 57.79
 -1 5 1 1779.32 232.18
 -1 5 1 1919.21 234.58
 1 -5 -1 1861.81 233.78
 -1 -5 1 1670.43 235.48
 -2 5 2 5.8 10.4
 2 5 -2 -1.8 8.6
 -2 5 2 2.5 11.1
 -2 -5 2 1.6 7
 2 -5 -2 2.5 10.2
 2 -5 -2 29.7 33.6
 -2 -5 2 -0.8 5.7
 2 -5 -2 0.2 11.7
 -2 -5 2 -20 30
 -3 5 3 1502.15 181.28
 3 5 -3 1199.08 176.28
 -3 -5 3 1266.07 174.68
 -3 -5 3 1524.85 179.28
 3 -5 -3 1437.46 185.88
 3 -5 -3 1301.87 178.58
 -3 -5 3 1307.67 199.68
 4 5 -4 28.9 13.3
 -4 5 4 114.99 30.1
 4 -5 -4 51.69 43
 4 -5 -4 61.59 11.8
 -4 -5 4 57.49 49.8
 -4 -5 4 50.59 23.9
 4 -5 -4 40.5 33.9
 -4 -5 4 47.7 10.8
 5 5 -5 329.07 41.2
 -5 5 5 212.08 58.29
 -5 -5 5 256.67 38.5
 5 -5 -5 260.27 72.99
 -5 -5 5 233.98 60.89
 -5 -5 5 126.39 66.99
 5 -5 -5 224.68 38.1
 -6 5 6 2.2 28.8
 -6 5 6 13.5 28.4
 -6 -5 6 15.6 8.7
 -6 -5 6 -14.8 39.1
 6 -5 -6 0.5 7.1
 6 -5 -6 18.8 30.9
 -6 -5 6 -2.6 24.7
 6 -5 -6 6.5 46.4
 -7 5 7 72.99 47.4
 -7 5 7 189.28 48.4
 7 -5 -7 111.39 72.79
 7 -5 -7 119.09 24.3
 -7 -5 7 232.58 68.19
 -7 -5 7 82.69 42.7
 7 -5 -7 52.19 41.7
 0 -6 0 4654.13 575.64
 0 -6 0 4363.66 575.74
 1 6 -1 77.79 25.4
 -1 6 1 124.39 24.4
 -1 -6 1 101.09 28
 1 -6 -1 138.49 22.6
 -2 6 2 531.05 90.69
 -2 6 2 630.44 95.09
 -2 -6 2 729.13 88.09
 -2 -6 2 705.83 89.99
 2 -6 -2 582.44 91.69
 -2 -6 2 692.33 125.09
 2 -6 -2 759.82 96.59
 3 6 -3 196.28 42.6
 -3 6 3 293.97 46.3
 -3 6 3 303.67 51.29
 3 -6 -3 252.47 50.89
 3 -6 -3 309.87 43.4
 -3 -6 3 252.97 37.9
 -3 -6 3 296.67 77.59
 -4 6 4 217.98 51.29
 4 6 -4 143.59 37.5
 -4 6 4 159.28 44.1
 4 -6 -4 100.99 53.29
 -4 -6 4 224.68 45.5
 -4 -6 4 329.07 80.49
 -4 -6 4 255.17 31.3
 4 -6 -4 209.78 40.1
 4 -6 -4 203.18 50.19
 -5 6 5 233.98 61.39
 -5 6 5 183.08 51.09
 -5 -6 5 240.28 33.8
 5 -6 -5 185.18 64.09
 -5 -6 5 212.88 54.69
 5 -6 -5 118.89 50.99
 -5 -6 5 376.26 86.59
 5 -6 -5 250.67 33.4
 -6 6 6 356.96 88.79
 -6 6 6 522.35 84.39
 6 -6 -6 449.86 64.69
 -6 -6 6 641.74 114.39
 6 -6 -6 456.45 109.49
 -6 -6 6 519.85 64.69
 6 -6 -6 269.47 97.79
 -6 -6 6 471.45 86.89
 -7 6 7 233.38 77.59
 -7 6 7 450.85 79.39
 -7 -6 7 376.76 52.79
 7 -6 -7 322.07 53.49
 -7 -6 7 510.35 105.29
 -7 -6 7 380.46 94.09
 7 -6 -7 349.96 98.19
 0 -7 0 1.4 3.4
 0 -7 0 10.6 25.4
 0 -7 0 -4 6.2
 1 7 -1 16.5 18.7
 1 -7 -1 224.98 57.59
 1 -7 -1 39.3 13.6
 -1 -7 1 27.8 17.9
 1 -7 -1 40.6 12.2
 -2 7 2 1435.36 189.78
 -2 7 2 1551.44 191.68
 -2 -7 2 1439.86 188.08
 -2 -7 2 1374.56 184.18
 2 -7 -2 1368.66 187.98
 -3 7 3 6.8 14.6
 3 7 -3 7.2 13.7
 -3 7 3 10.5 13.1
 -3 -7 3 5.1 11.1
 3 -7 -3 5.2 18.5
 3 -7 -3 0.2 32.2
 3 -7 -3 2 8.5
 -3 -7 3 -30 33.5
 -3 -7 3 4.2 6.8
 -4 7 4 1199.78 202.08
 -4 7 4 1582.24 199.58
 -4 -7 4 1530.65 198.58
 4 -7 -4 1412.16 206.88
 -4 -7 4 1402.26 225.08
 -4 -7 4 1429.56 191.98
 4 -7 -4 1673.23 198.98
 -5 7 5 64.59 33.5
 -5 7 5 55.99 28.2
 5 -7 -5 83.39 16
 5 -7 -5 -15 31.1
 -5 -7 5 96.49 63.09
 5 -7 -5 86.49 42
 -5 -7 5 97.59 19.9
 -5 -7 5 98.29 32.8
 -6 7 6 -1.9 22.9
 -6 7 6 -4 24.2
 -6 -7 6 1.5 6.8
 6 -7 -6 -15.6 30.1
 -6 -7 6 31.3 51.09
 6 -7 -6 -2.2 6
 6 -7 -6 -10 44.7
 -6 -7 6 2.2 25.4
 -7 7 7 8.5 28.2
 -7 7 7 37.6 46.7
 7 -7 -7 -6.8 8.9
 -7 -7 7 7.9 8.2
 -7 -7 7 -26.8 67.29
 7 -7 -7 -30.9 48.9
 7 -7 -7 -46.2 35.8
 -7 -7 7 15.7 35.3
 0 -8 0 883.01 113.19
 0 -8 0 845.52 112.59
 1 -8 -1 755.82 132.39
 -1 -8 1 758.42 115.19
 -2 8 2 119.09 32.7
 -2 -8 2 172.18 36.3
 2 -8 -2 148.59 31
 2 -8 -2 104.69 31.6
 -3 8 3 36.4 17.3
 -3 8 3 19.4 19.2
 3 8 -3 -1.3 14.8
 -3 8 3 45 17
 3 -8 -3 35.2 22.8
 -3 -8 3 64.39 50.89
 -3 -8 3 45.4 14.2
 -3 -8 3 40.4 11.3
 3 -8 -3 -6.2 35.7
 3 -8 -3 29.8 13.3
 -4 8 4 -16.5 20.9
 4 8 -4 -2.6 14.8
 -4 8 4 -13.8 17.5
 4 -8 -4 -15.9 26.7
 -4 -8 4 -20.6 51.39
 4 -8 -4 -2.7 13.6
 4 -8 -4 -18.3 34.6
 -4 -8 4 39.2 20.9
 -4 -8 4 8.9 8.9
 -5 8 5 415.76 91.39
 -5 8 5 567.94 84.69
 -5 -8 5 550.04 71.69
 -5 -8 5 459.95 83.19
 5 -8 -5 537.75 70.59
 -5 -8 5 480.55 115.69
 5 -8 -5 472.35 98.29
 -6 8 6 127.69 49.2
 -6 8 6 166.38 43.7
 6 -8 -6 222.08 70.49
 -6 -8 6 90.69 67.69
 6 -8 -6 190.68 29.4
 -6 -8 6 135.69 44.9
 6 -8 -6 126.59 88.39
 -6 -8 6 195.88 29.6
 -7 8 7 285.87 63.29
 -7 8 7 234.28 71.79
 -7 -8 7 391.56 101.79
 7 -8 -7 263.27 42.5
 -7 -8 7 295.87 42.1
 7 -8 -7 248.18 85.39
 -7 -8 7 326.27 72.49
 7 -8 -7 151.68 68.19
 -1 9 1 304.07 53.09
 1 9 -1 371.26 88.39
 1 -9 -1 360.76 50.39
 -1 -9 1 241.88 70.29
 2 9 -2 40.9 28.2
 -2 9 2 107.79 28
 2 -9 -2 32.1 39.2
 -2 -9 2 99.79 30.1
 2 -9 -2 91.39 23.3
 2 -9 -2 181.28 32.9
 -3 9 3 712.63 109.49
 3 9 -3 659.03 123.99
 -3 9 3 666.33 111.19
 -3 -9 3 680.63 145.89
 3 -9 -3 819.12 104.89
 3 -9 -3 768.92 111.99
 -3 -9 3 743.93 99.99
 -3 -9 3 777.02 101.39
 -4 9 4 371.66 75.99
 -4 9 4 434.06 73.59
 -4 9 4 343.57 64.49
 -4 -9 4 333.97 61.49
 4 -9 -4 475.25 80.19
 4 -9 -4 225.18 79.99
 -4 -9 4 502.75 123.79
 -4 -9 4 416.36 56.89
 4 -9 -4 504.45 67.09
 -5 9 5 329.97 77.99
 -5 9 5 250.07 69.59
 -5 9 5 290.27 60.19
 -5 -9 5 354.96 46.5
 -5 -9 5 370.96 99.19
 5 -9 -5 350.36 79.19
 5 -9 -5 199.98 69.69
 -5 -9 5 287.07 61.79
 -6 9 6 37 32.6
 -6 9 6 82.99 35.9
 -6 9 6 22.7 27.5
 -6 -9 6 3.8 28.5
 6 -9 -6 17.2 9.2
 -6 -9 6 28.7 10.6
 6 -9 -6 -50.69 44.8
 6 -9 -6 28 38
 -6 -9 6 6.9 57.69
 -7 9 7 12.4 29.3
 -7 9 7 50.19 43.3
 -7 9 7 13.5 33
 7 -9 -7 -10.5 39
 7 -9 -7 38.7 18.1
 7 -9 -7 101.69 72.99
 -7 -9 7 24.1 57.99
 0 -10 0 6008.1 762.02
 0 -10 0 5917.91 762.32
 -1 10 1 271.07 50.19
 1 10 -1 283.17 75.29
 1 -10 -1 359.36 47
 -1 -10 1 257.87 67.99
 2 10 -2 112.99 43.2
 -2 10 2 204.88 42.3
 -2 -10 2 237.88 42.1
 2 -10 -2 156.78 58.89
 2 -10 -2 188.08 38.2
 2 -10 -2 222.98 35
 3 10 -3 -25.4 28.6
 -3 10 3 21.7 26.1
 -3 -10 3 35.2 16
 -3 -10 3 127.39 64.09
 3 -10 -3 35.1 41.4
 3 -10 -3 26 26.1
 3 -10 -3 26.8 16.3
 -3 -10 3 57.69 14.2
 4 10 -4 382.46 74.99
 -4 10 4 293.67 53.99
 -4 10 4 269.07 64.59
 -4 10 4 256.57 63.99
 4 -10 -4 156.58 68.89
 4 -10 -4 274.47 67.59
 -4 -10 4 313.87 45.2
 -4 -10 4 422.06 122.59
 -4 -10 4 233.88 50.69
 4 -10 -4 340.17 53.89
 -5 10 5 20.2 25.9
 -5 10 5 25.6 30.3
 -5 10 5 -3.1 31.1
 -5 -10 5 19 55.89
 5 -10 -5 7.3 43.8
 -5 -10 5 45.4 26.3
 -5 -10 5 20.7 10.9
 5 -10 -5 -1.3 35.2
 -6 10 6 723.43 130.09
 -6 10 6 722.73 132.39
 -6 10 6 703.53 116.69
 -6 -10 6 702.13 161.58
 6 -10 -6 806.72 143.09
 6 -10 -6 826.82 105.19
 -6 -10 6 808.12 105.69
 -7 10 7 3.1 37
 -7 10 7 -9 28.7
 -7 10 7 20.7 38.5
 -7 -10 7 -18.6 62.69
 7 -10 -7 2 8.5
 7 -10 -7 -35.7 47.9
 7 -10 -7 -23.6 39.4
 -7 -10 7 -8.7 7.2
 0 11 0 -0.3 33.6
 0 -11 0 27.2 9.1
 0 -11 0 51.69 12.4
 1 11 -1 178.18 56.09
 -1 11 1 223.78 41.8
 -1 -11 1 316.57 60.79
 1 -11 -1 198.78 60.79
 -2 11 2 613.34 78.59
 2 11 -2 376.36 93.39
 2 -11 -2 316.87 93.19
 2 -11 -2 537.45 71.79
 2 -11 -2 490.65 75.39
 -2 -11 2 473.65 79.19
 -3 11 3 186.58 49.9
 -3 11 3 259.27 48.3
 3 -11 -3 209.48 56.79
 -3 -11 3 287.27 46.5
 3 -11 -3 139.39 70.89
 3 -11 -3 266.47 45.6
 -3 -11 3 180.68 86.19
 -4 11 4 224.78 61.79
 4 -11 -4 151.18 70.39
 -4 -11 4 301.37 95.19
 4 -11 -4 398.36 73.09
 -4 -11 4 330.67 46.3
 -5 11 5 85.69 40.6
 -5 11 5 189.08 40.8
 -5 11 5 43.3 32.1
 -5 -11 5 79.19 73.99
 -5 -11 5 154.38 25.7
 5 -11 -5 43.7 46.3
 5 -11 -5 153.98 51.89
 -6 11 6 42.7 29.9
 -6 11 6 65.49 39.6
 -6 11 6 7.1 27.4
 6 -11 -6 41.7 12.2
 6 -11 -6 -2.4 43.8
 -6 -11 6 36.5 13
 -6 -11 6 4.6 63.39
 6 -11 -6 15.9 42.9
 -7 11 7 129.69 41.2
 -7 11 7 32.8 44.6
 -7 11 7 30.5 64.89
 7 -11 -7 75.39 17.3
 7 -11 -7 31.2 52.99
 7 -11 -7 -27.4 56.49
 -7 -11 7 58.19 16
 0 -12 0 9.3 33.4
 0 -12 0 39.1 10.1
 0 -12 0 27.4 10.9
 -1 -12 1 1653.53 199.98
 1 -12 -1 1620.04 200.48
 -1 -12 1 1215.58 212.78
 2 12 -2 -10.7 35.3
 -2 12 2 7.8 19.5
 2 -12 -2 119.29 48.6
 2 -12 -2 2.6 10.7
 -2 -12 2 5.4 18.2
 2 -12 -2 10.9 20.4
 -3 12 3 8.1 22.2
 3 12 -3 13.6 37.2
 3 -12 -3 11.4 17.3
 3 -12 -3 -21.1 25.9
 3 -12 -3 32.5 45.6
 -3 -12 3 -0.2 15.1
 -3 -12 3 82.79 61.69
 -4 12 4 97.59 26.3
 4 12 -4 -1.7 30
 -4 12 4 69.19 33.6
 -4 -12 4 25.7 64.49
 -4 -12 4 55.49 17.5
 4 -12 -4 82.79 39.2
 4 -12 -4 28.2 47.3
 -5 12 5 568.74 94.39
 -5 12 5 451.05 93.99
 -5 -12 5 515.75 135.39
 5 -12 -5 347.37 103.19
 -5 -12 5 549.35 72.19
 5 -12 -5 520.15 100.29
 -6 12 6 86.59 38.7
 -6 12 6 49.7 39.5
 -6 12 6 108.99 34.6
 6 -12 -6 16.9 53.09
 6 -12 -6 29.9 11.5
 6 -12 -6 20.1 49.3
 -6 -12 6 112.29 88.59
 -6 -12 6 55.89 17.2
 7 -12 -7 401.86 55.69
 -7 -12 7 327.47 54.99
 0 -13 0 6.2 8.2
 0 -13 0 -9 43.4
 -1 -13 1 525.75 74.39
 1 -13 -1 565.84 77.29
 -1 -13 1 488.45 101.49
 2 -13 -2 1053.99 149.99
 -2 -13 2 995.1 155.88
 2 -13 -2 1155.98 146.59
 -3 13 3 49.5 26.7
 3 -13 -3 17.3 15.4
 -3 -13 3 0.5 15.5
 3 -13 -3 6.5 25.9
 3 -13 -3 29.1 44.5
 -4 13 4 542.85 103.29
 -4 13 4 524.55 91.49
 4 -13 -4 680.63 107.39
 -4 -13 4 650.03 147.59
 -4 -13 4 678.83 88.09
 -5 13 5 30.1 25.4
 -5 13 5 52.29 34.3
 -5 -13 5 7.5 76.89
 -5 -13 5 58.89 18.2
 5 -13 -5 18.6 46.4
 5 -13 -5 65.49 40.9
 -6 13 6 24.4 31.7
 -6 -13 6 -78.59 65.29
 6 -13 -6 20.5 51.49
 -6 -13 6 -6.1 10.6
 6 -13 -6 14.9 9
 6 -13 -6 9.2 44.4
 0 -14 0 1702.93 200.98
 0 -14 0 1190.18 227.88
 -1 -14 1 6 6.4
 1 -14 -1 -2.8 50.49
 -2 14 2 205.28 50.69
 -2 -14 2 295.87 66.79
 2 -14 -2 127.59 75.19
 -2 -14 2 298.97 43.5
 2 -14 -2 222.78 54.69
 2 -14 -2 324.87 51.09
 -3 14 3 31 27.1
 3 -14 -3 2.3 43.7
 -3 -14 3 32.6 18.7
 -3 -14 3 86.09 72.69
 3 -14 -3 20.2 28.5
 -4 14 4 102.99 40
 4 -14 -4 192.68 49.7
 4 -14 -4 9 47.9
 -4 -14 4 164.38 85.99
 -4 -14 4 130.29 26.7
 -5 14 5 -15.7 20.2
 -5 14 5 8.6 29.1
 5 -14 -5 32.2 53.59
 -5 -14 5 -65.09 63.49
 5 -14 -5 25.2 40
 -5 -14 5 10 13.7
 -6 14 6 357.36 98.89
 -6 14 6 438.76 83.99
 -6 -14 6 507.15 133.99
 6 -14 -6 363.76 95.19
 6 -14 -6 248.08 93.89
 -6 -14 6 571.14 67.19
 0 -15 0 -0.7 38.9
 -1 -15 1 833.82 155.78
 -1 -15 1 970.5 126.19
 2 -15 -2 28.8 26.8
 -2 -15 2 19.7 9.6
 -2 -15 2 -14.1 21.9
 -3 15 3 414.46 88.19
 3 -15 -3 556.84 88.69
 -3 -15 3 547.55 136.59
 3 -15 -3 475.55 133.69
 -4 15 4 24.3 33.7
 -4 -15 4 17.5 16.5
 4 -15 -4 25.2 34
 4 -15 -4 40.9 50.89
 -4 -15 4 -25.2 61.79
 -5 15 5 48.9 38.9
 -5 -15 5 238.68 94.89
 -5 -15 5 122.49 27.7
 5 -15 -5 172.98 57.49
 5 -15 -5 87.59 64.09
 -6 15 6 -14.8 26.1
 -6 15 6 12.2 8.3
 -6 15 6 -27.6 35.8
 -6 -15 6 -0.8 11.5
 6 -15 -6 -19.1 58.69
 6 -15 -6 77.29 45.4
 -6 -15 6 -83.79 65.09
 0 -16 0 1429.96 187.98
 0 -16 0 1389.86 225.98
 -1 -16 1 497.05 109.49
 1 -16 -1 407.16 119.19
 -1 -16 1 602.24 78.59
 2 -16 -2 34.5 26.8
 2 -16 -2 -19.4 50.99
 -2 -16 2 33.6 29.3
 -2 -16 2 31.9 12.3
 3 -16 -3 -34.5 46.2
 -3 -16 3 8.2 18
 3 -16 -3 44.7 32.2
 -3 -16 3 -18.9 67.09
 -3 -16 3 -2.5 9.8
 -4 16 4 81.79 38.2
 -4 -16 4 100.69 26.1
 4 -16 -4 104.79 45.6
 -4 -16 4 162.88 91.99
 4 -16 -4 38.9 59.19
 -5 16 5 121.99 52.09
 -5 -16 5 123.89 30
 -5 -16 5 243.28 109.89
 5 -16 -5 97.29 68.49
 5 -16 -5 133.59 55.49
 -6 -16 6 89.19 24.6
 6 -16 -6 100.79 73.09
 6 -16 -6 117.99 53.59
 0 -17 0 -12 43.6
 0 -17 0 9.5 13.2
 -1 -17 1 10.1 35.4
 -1 -17 1 8.4 9.9
 1 -17 -1 -8.4 46.7
 -2 -17 2 956.2 148.99
 2 -17 -2 672.33 176.68
 -2 -17 2 982.2 128.79
 2 -17 -2 939.51 137.09
 -3 -17 3 9.6 9.6
 -3 -17 3 -13.1 16
 -3 -17 3 14.8 63.79
 3 -17 -3 14.1 29.8
 3 -17 -3 -11.9 55.39
 -4 -17 4 568.44 78.29
 -4 -17 4 435.46 75.79
 -4 -17 4 481.15 137.39
 4 -17 -4 328.07 112.99
 4 -17 -4 440.06 94.69
 5 -17 -5 1.9 57.79
 -5 -17 5 8.1 15.9
 5 -17 -5 66.59 49.1
 -5 -17 5 -32.3 82.49
 0 -18 0 150.88 66.79
 -1 -18 1 471.65 68.69
 -1 -18 1 419.16 104.59
 1 -18 -1 433.36 110.69
 -2 -18 2 159.98 30.5
 2 -18 -2 125.89 67.79
 2 -18 -2 108.49 39.3
 -2 -18 2 63.69 40.1
 -3 -18 3 95.19 78.09
 3 -18 -3 63.29 66.89
 -3 -18 3 25.4 23
 3 -18 -3 8.9 31.8
 4 -18 -4 89.99 72.79
 4 -18 -4 64.69 43.3
 -4 -18 4 21.3 90.39
 -4 -18 4 4.4 19
 -4 -18 4 51.29 19.3
 -5 -18 5 241.68 108.39
 -5 -18 5 215.58 46.3
 5 -18 -5 291.67 74.69
 -5 -18 5 186.28 47.7
 5 -18 -5 159.68 77.19
 0 -19 0 -20.3 41.7
 -1 -19 1 113.69 25.9
 -1 -19 1 81.29 50.29
 1 -19 -1 83.89 62.99
 -2 -19 2 67.59 19.9
 2 -19 -2 102.49 38.7
 2 -19 -2 44.1 55.69
 -2 -19 2 39.5 34.2
 -3 -19 3 462.35 91.69
 -3 -19 3 471.35 68.19
 3 -19 -3 322.37 80.69
 -3 -19 3 339.47 117.69
 3 -19 -3 303.27 105.59
 -4 -19 4 21.6 20.8
 -4 -19 4 62.79 21.2
 4 -19 -4 41.6 63.09
 -4 -19 4 -26.7 77.89
 4 -19 -4 80.49 46.3
 0 -20 0 891.41 174.98
 1 -20 -1 72.09 60.69
 -1 -20 1 78.39 47.6
 -1 -20 1 39.8 22
 1 -20 -1 118.89 39.5
 2 -20 -2 86.39 62.19
 -2 -20 2 47.1 19.4
 -2 -20 2 69.99 42.1
 2 -20 -2 89.89 41.1
 3 -20 -3 4.4 31.9
 -3 -20 3 -4.7 12.1
 -3 -20 3 -14.4 84.69
 3 -20 -3 1.7 58.89
 -3 -20 3 4 22.4
 -4 -20 4 75.09 24.6
 4 -20 -4 43.3 44.7
 -4 -20 4 80.79 88.69
 -4 -20 4 118.69 33.9
 4 -20 -4 144.09 74.69
 0 -21 0 -41.8 44.1
 1 -21 -1 80.79 63.09
 -1 -21 1 67.59 23.7
 1 -21 -1 142.89 43.1
 -1 -21 1 22.3 41.6
 2 -21 -2 207.88 50.39
 -2 -21 2 115.19 32.3
 -2 -21 2 164.58 57.49
 -3 -21 3 164.28 39.9
 -3 -21 3 158.78 95.39
 3 -21 -3 112.59 47.7
 -3 -21 3 211.38 63.79
 3 -21 -3 114.59 71.69
 0 -22 0 -22.1 40.5
 -1 -22 1 304.77 96.09
 1 -22 -1 268.07 65.79
 -1 -22 1 222.68 47.6
 -2 -22 2 31.9 34
 -2 -22 2 -9.2 14.1
 2 -22 -2 25.4 65.59
 2 -22 -2 19.5 34.5
 -3 -22 3 -2.4 25.5
 -3 -22 3 -11 14.9
 3 -22 -3 10.4 33.3
 -3 -22 3 11.3 79.39
 0 -23 0 10.8 52.19
 1 -23 -1 46.9 67.19
 -1 -23 1 39.4 46.7
 -1 -23 1 -16.6 21
 1 -23 -1 32.2 33.7
 -2 -23 2 236.98 51.79
 -2 -23 2 298.57 90.89
 0 -24 0 156.48 68.59
 -8 0 7 -21.3 36.3
 8 0 -7 -4.2 64.29
 -8 0 7 18.1 43.4
 8 0 -7 -27.2 13.8
 8 0 -7 26.2 15.8
 -7 0 6 606.44 95.89
 -7 0 6 496.85 93.49
 7 0 -6 394.16 57.49
 7 0 -6 323.77 102.79
 7 0 -6 225.48 71.99
 6 0 -5 3 33.4
 -6 0 5 -10.4 33.7
 6 0 -5 -86.49 42.2
 6 0 -5 -5.3 9.1
 -6 0 5 5.4 24.3
 5 0 -4 346.87 43.3
 5 0 -4 113.19 66.39
 -5 0 4 256.27 66.39
 4 0 -3 -17.8 27.1
 -4 0 3 -24.8 18.1
 4 0 -3 5.6 9
 -4 0 3 -1.2 14.6
 4 0 -3 1.8 4.8
 3 0 -2 615.14 75.69
 -3 0 2 564.54 86.09
 3 0 -2 472.15 100.59
 -3 0 2 506.35 92.59
 -2 0 1 -0.3 7.4
 -2 0 1 0.1 2.5
 2 0 -1 -6.3 14.9
 2 0 -1 7.1 7.2
 -2 0 1 -17.2 18.5
 -1 0 0 3230.28 457.95
 -1 0 0 3919.91 459.95
 1 0 0 3530.25 458.05
 1 0 0 3679.03 459.95
 1 0 -2 1360.76 193.68
 -1 0 2 1533.85 193.88
 -1 0 2 1539.15 189.78
 1 0 -2 1491.85 189.88
 2 0 -3 -15.8 11.8
 2 0 -3 -0.2 2.7
 -2 0 3 -3 2.1
 2 0 -3 -2.3 14.4
 3 0 -4 319.37 82.29
 -3 0 4 552.04 83.99
 3 0 -4 504.95 62.39
 -4 0 5 -11.6 22.4
 4 0 -5 81.79 25.4
 -4 0 5 21.9 15.8
 4 0 -5 7.8 6.8
 5 0 -6 2088.29 274.17
 5 0 -6 1756.62 297.87
 -5 0 6 2321.17 287.07
 -5 0 6 2237.98 293.07
 -6 0 7 0.6 27.4
 6 0 -7 -70.09 45.8
 6 0 -7 0.4 9.2
 -6 0 7 -12.2 34.8
 6 0 -7 -15.2 19.6
 7 0 -8 72.79 70.69
 7 0 -8 88.29 27.2
 -7 0 8 156.78 52.59
 7 0 -8 160.78 28.9
 -7 0 8 144.19 52.19
 8 1 -7 -40.8 63.79
 8 1 -7 13.1 20.7
 8 1 -7 13.7 14.7
 -8 1 7 -3.3 39
 -8 1 7 -8.9 38.7
 -8 -1 7 65.29 44
 -8 -1 7 109.79 52.39
 8 -1 -7 3.4 19.5
 8 -1 -7 7.3 63.19
 8 -1 -7 32.2 18.3
 7 1 -6 -18.7 19.7
 -7 1 6 -26.8 28.4
 7 1 -6 -22.8 56.09
 -7 1 6 -7.8 37.2
 7 1 -6 -19.4 9.4
 7 -1 -6 -1.3 25.1
 7 -1 -6 -36.1 52.99
 -7 -1 6 -1.4 33.5
 -7 -1 6 25.5 41.4
 7 -1 -6 10.9 11.4
 -6 1 5 326.27 75.89
 6 1 -5 223.08 85.69
 6 1 -5 380.66 52.69
 -6 1 5 305.57 76.39
 -6 -1 5 487.05 83.59
 6 -1 -5 389.56 51.19
 -6 -1 5 329.47 74.69
 6 -1 -5 208.28 66.89
 6 -1 -5 437.36 99.79
 -5 1 4 780.72 125.29
 -5 1 4 1073.89 130.59
 5 1 -4 602.04 140.89
 5 1 -4 760.42 107.69
 5 -1 -4 835.62 113.99
 5 -1 -4 720.83 137.09
 5 -1 -4 852.71 107.39
 -5 -1 4 811.72 130.49
 -5 -1 4 677.53 123.69
 -4 1 3 1268.57 160.88
 4 1 -3 1264.37 152.08
 -4 1 3 1012.4 156.98
 4 1 -3 939.11 166.58
 4 1 -3 1132.19 148.09
 -4 -1 3 1084.89 156.88
 4 -1 -3 1026 165.68
 -4 -1 3 1159.98 163.38
 4 -1 -3 1134.69 151.88
 4 -1 -3 1137.69 147.49
 -4 -1 3 1152.68 147.09
 3 1 -2 839.72 117.69
 -3 1 2 749.82 129.09
 3 1 -2 969.1 143.89
 3 -1 -2 1006.7 117.59
 -3 -1 2 863.21 116.99
 -3 -1 2 690.03 136.99
 3 -1 -2 1226.28 140.09
 -3 -1 2 951.5 126.29
 2 1 -1 5.2 17.6
 -2 1 1 -3.4 12.8
 2 1 -1 10.7 6.4
 2 -1 -1 2.1 3.3
 -2 -1 1 13.5 8.9
 -2 -1 1 9.5 4
 2 -1 -1 9.4 13.7
 2 -1 -1 1.9 7.8
 -2 -1 1 46.1 20.3
 -1 1 0 210.68 35.5
 -1 1 0 273.27 35.4
 1 1 0 240.88 34.6
 1 1 0 229.88 38.9
 1 1 0 276.07 33.3
 1 -1 0 250.97 35.9
 -1 -1 0 244.78 39.8
 -1 -1 0 289.77 33.2
 1 -1 0 269.77 35.8
 -1 -1 0 204.28 34.3
 -1 1 2 1238.08 140.29
 1 1 -2 1034.2 138.59
 -1 1 2 1161.88 141.59
 1 1 -2 874.31 142.69
 1 -1 -2 1037.9 141.59
 -1 -1 2 1123.29 138.49
 -1 -1 2 1054.29 143.59
 -2 1 3 53.29 13.8
 -2 1 3 43.2 20.7
 2 1 -3 47.7 8.5
 2 1 -3 57.69 24.9
 2 -1 -3 8.3 15.6
 2 -1 -3 29 6.8
 -2 -1 3 42.2 7.5
 -2 -1 3 56.59 11.8
 -2 -1 3 46.7 26.6
 2 -1 -3 43.9 17.3
 3 1 -4 520.25 64.59
 3 1 -4 667.63 100.29
 -3 1 4 370.16 80.79
 -3 -1 4 407.36 85.79
 3 -1 -4 592.04 88.59
 3 -1 -4 458.75 63.69
 -3 -1 4 466.85 63.39
 3 -1 -4 271.27 86.09
 -3 -1 4 561.24 73.09
 4 1 -5 240.58 63.39
 -4 1 5 471.35 63.19
 4 1 -5 267.47 37.8
 4 -1 -5 263.37 36.7
 -4 -1 5 318.37 51.39
 4 -1 -5 210.38 60.19
 4 -1 -5 124.09 53.59
 -4 -1 5 213.58 59.19
 5 1 -6 47.8 20.5
 -5 1 6 -4.7 20.1
 5 1 -6 -21.5 6.4
 5 1 -6 -5.5 47
 -5 1 6 -54.09 26.5
 5 -1 -6 2.7 7.5
 5 -1 -6 -25.2 40.4
 -5 -1 6 40.3 26.3
 5 -1 -6 -20.4 22.7
 -5 -1 6 -13.5 32
 6 1 -7 124.39 67.09
 -6 1 7 174.18 50.69
 6 1 -7 153.38 28
 -6 1 7 108.39 40.9
 6 -1 -7 60.89 32.6
 -6 -1 7 82.19 48
 6 -1 -7 157.78 25.9
 -6 -1 7 191.08 45.1
 6 -1 -7 111.49 62.29
 7 1 -8 84.09 23.4
 -7 1 8 127.29 49.3
 -7 1 8 103.69 47.7
 7 1 -8 80.29 70.59
 7 1 -8 137.09 26.4
 -7 -1 8 57.09 41.5
 7 -1 -8 63.39 27.7
 7 -1 -8 48.5 19.9
 7 -1 -8 42.7 63.19
 -7 -1 8 96.09 51.49
 -8 2 7 196.98 68.39
 8 2 -7 201.58 44.5
 -8 2 7 327.07 77.89
 8 -2 -7 206.38 55.69
 8 -2 -7 259.77 45.3
 -8 -2 7 240.58 70.69
 8 -2 -7 177.48 84.29
 -7 2 6 42.7 41.5
 -7 2 6 35.8 37.9
 7 2 -6 34.9 23.3
 7 2 -6 9.6 14.6
 7 2 -6 25.9 65.59
 -7 -2 6 59.39 44.9
 7 -2 -6 47.3 33.9
 7 -2 -6 60.49 17.6
 7 -2 -6 -5.5 52.39
 -7 -2 6 175.18 54.29
 6 2 -5 304.97 46.5
 6 2 -5 147.69 75.89
 -6 2 5 338.17 72.09
 6 2 -5 202.98 65.69
 -6 2 5 320.47 70.09
 6 -2 -5 156.18 60.39
 6 -2 -5 298.87 84.09
 -6 -2 5 543.25 84.89
 -6 -2 5 413.96 87.69
 6 -2 -5 330.17 44.1
 -5 2 4 46.6 32.2
 5 2 -4 25.8 12.2
 -5 2 4 -4.8 23.7
 5 2 -4 10.2 49.3
 -5 -2 4 81.19 42
 5 -2 -4 -3.4 6.8
 -5 -2 4 5.7 25.3
 -5 -2 4 4.1 5.7
 5 -2 -4 29.2 44.3
 5 -2 -4 47.3 18.9
 -4 2 3 12.8 16
 4 2 -3 11.7 7.2
 -4 2 3 -2 20.7
 4 2 -3 4.5 10.3
 4 2 -3 3.2 33.7
 -4 -2 3 8.6 4.6
 -4 -2 3 9.1 17.7
 4 -2 -3 11 5.5
 4 -2 -3 38.5 32.2
 -4 -2 3 -8.4 26.5
 3 2 -2 908.21 115.99
 3 2 -2 619.14 137.69
 -3 2 2 1049.79 126.69
 3 2 -2 817.12 118.09
 -3 2 2 952.1 126.29
 -3 -2 2 791.52 122.49
 3 -2 -2 1094.29 134.49
 -3 -2 2 846.72 114.79
 -3 -2 2 669.53 135.99
 3 -2 -2 970.4 114.99
 2 2 -1 2612.54 302.27
 2 2 -1 2350.06 300.87
 -2 2 1 2566.24 304.87
 2 2 -1 1906.41 313.87
 -2 2 1 2187.88 304.47
 2 -2 -1 2351.76 305.67
 -2 -2 1 2252.77 302.97
 -2 -2 1 2169.58 309.77
 2 -2 -1 2487.45 300.27
 -1 2 0 30.3 10.1
 -1 2 0 59.89 10.2
 1 2 0 42.4 9.5
 -1 -2 0 40.1 10.7
 1 -2 0 37.8 10.3
 1 -2 0 57.79 10.3
 -1 -2 0 74.29 11.2
 0 2 1 1343.97 187.98
 0 -2 -1 1532.55 186.38
 0 -2 -1 1474.55 187.98
 -1 2 2 469.45 59.49
 -1 2 2 451.65 59.89
 1 2 -2 335.47 63.29
 -1 -2 2 458.45 57.19
 -1 -2 2 439.26 64.89
 1 -2 -2 469.15 60.59
 -1 -2 2 424.66 57.69
 -2 2 3 -1.4 18
 2 2 -3 -0.8 3.8
 -2 2 3 3.2 7.6
 2 2 -3 12.4 21.7
 -2 -2 3 7.1 6.8
 2 -2 -3 3.5 7.5
 2 -2 -3 -10.2 16.3
 2 -2 -3 13.5 13.3
 -2 -2 3 0.8 2.9
 -2 -2 3 9.2 17.7
 3 2 -4 12.4 8.1
 -3 2 4 15.8 25.7
 -3 2 4 -4.1 14
 3 2 -4 -73.19 32.9
 -3 -2 4 -28.7 32.2
 -3 -2 4 12.3 14
 3 -2 -4 14.5 31.8
 -3 -2 4 -0.7 4.5
 3 -2 -4 4.1 4.7
 -4 2 5 1019.5 136.19
 -4 2 5 946.61 132.39
 4 2 -5 898.11 122.39
 -4 -2 5 933.31 120.99
 -4 -2 5 953.5 141.99
 4 -2 -5 704.13 141.89
 -4 -2 5 1036.3 131.69
 4 -2 -5 900.51 121.19
 5 2 -6 30.3 13.7
 5 2 -6 117.89 60.89
 -5 2 6 79.69 37.4
 5 2 -6 39.3 19.5
 -5 2 6 74.59 30.3
 5 -2 -6 21.6 29.9
 5 -2 -6 84.39 15.3
 -5 -2 6 83.49 14.1
 5 -2 -6 53.69 47.4
 -5 -2 6 68.09 43
 -5 -2 6 132.89 37.3
 6 2 -7 409.36 103.69
 -6 2 7 375.56 81.29
 -6 2 7 535.75 86.99
 6 2 -7 413.36 61.19
 6 2 -7 318.67 61.09
 -6 -2 7 509.55 84.09
 6 -2 -7 346.27 79.79
 6 -2 -7 522.15 59.79
 -6 -2 7 505.15 94.69
 6 -2 -7 408.56 104.59
 7 2 -8 -17.6 54.29
 -7 2 8 43.3 37.2
 7 2 -8 45.2 20.8
 -7 2 8 4 37
 7 -2 -8 50.19 29
 -7 -2 8 4 34.6
 7 -2 -8 92.99 71.29
 -7 -2 8 39.8 43.4
 7 -2 -8 24.1 14
 -8 3 7 -55.89 38.9
 -8 3 7 -6.8 36.7
 -8 -3 7 24.3 44.3
 8 -3 -7 52.79 30
 8 -3 -7 -6 12
 8 -3 -7 56.59 64.89
 7 3 -6 118.59 78.59
 7 3 -6 65.69 21.8
 7 3 -6 103.29 22
 7 3 -6 58.49 21.3
 -7 3 6 195.18 59.99
 -7 -3 6 138.69 51.09
 7 -3 -6 41.4 34.6
 7 -3 -6 184.88 79.69
 7 -3 -6 73.39 18.8
 -7 -3 6 145.69 53.69
 6 3 -5 2.5 39.3
 6 3 -5 60.89 17.8
 -6 3 5 67.39 35.7
 -6 3 5 37.6 28.9
 6 3 -5 68.69 57.29
 -6 -3 5 87.39 46.1
 -6 -3 5 39.7 10.8
 6 -3 -5 -12.7 46.1
 6 -3 -5 54.99 43.2
 -6 -3 5 72.69 41
 6 -3 -5 78.99 16.4
 5 3 -4 847.72 112.69
 -5 3 4 799.82 126.19
 -5 3 4 697.73 127.99
 5 3 -4 747.23 147.49
 -5 -3 4 891.11 109.99
 5 -3 -4 860.11 110.49
 5 -3 -4 865.61 140.99
 -5 -3 4 736.23 137.49
 -5 -3 4 708.93 125.89
 5 -3 -4 917.91 118.59
 -4 3 3 262.57 55.09
 4 3 -3 242.08 76.89
 4 3 -3 256.87 43.5
 -4 3 3 444.46 62.39
 -4 -3 3 317.67 41.3
 4 -3 -3 427.26 75.19
 4 -3 -3 261.07 40.7
 4 -3 -3 315.07 48.5
 -4 -3 3 205.28 65.49
 3 3 -2 1185.38 153.58
 -3 3 2 827.52 133.39
 3 3 -2 994.6 126.79
 -3 3 2 945.51 133.29
 -3 -3 2 930.11 124.09
 -3 -3 2 1020.9 149.39
 3 -3 -2 927.61 123.69
 -3 -3 2 895.61 131.19
 3 -3 -2 951 129.89
 3 -3 -2 1081.29 140.29
 2 3 -1 -1 4
 -2 3 1 1.3 10
 2 3 -1 3.9 4.5
 -2 3 1 0.7 8
 2 3 -1 1.4 5.3
 2 -3 -1 3.3 8.5
 -2 -3 1 5.3 8.1
 2 -3 -1 -2.3 11.4
 -2 -3 1 -4.1 3.4
 -2 -3 1 38.5 23.1
 1 3 0 398.46 53.39
 -1 3 0 400.56 51.89
 -1 3 0 316.37 53.49
 1 3 0 361.16 50.79
 1 -3 0 363.96 53.59
 -1 -3 0 429.26 52.79
 1 -3 0 439.06 52.59
 0 3 1 483.95 58.29
 0 -3 -1 359.46 61.79
 0 -3 -1 470.65 58.89
 -1 3 2 2395.06 267.67
 -1 3 2 1855.11 268.27
 -1 3 2 2122.29 267.17
 -1 -3 2 1861.81 273.07
 1 -3 -2 2062.49 267.67
 -2 3 3 146.39 34.9
 2 3 -3 215.48 28.2
 2 3 -3 121.19 45.1
 -2 -3 3 152.78 30.4
 2 -3 -3 214.88 39.7
 2 -3 -3 187.08 32.8
 -2 -3 3 238.78 29.6
 -2 -3 3 223.88 56.09
 3 3 -4 3321.27 381.36
 3 3 -4 2818.92 382.96
 -3 3 4 2864.71 388.66
 -3 3 4 2823.72 389.76
 3 -3 -4 2693.83 393.06
 3 -3 -4 2823.42 381.56
 -3 -3 4 3541.95 404.66
 -3 -3 4 3317.97 387.16
 -3 -3 4 2760.22 381.86
 -4 3 5 41.3 20.3
 4 3 -5 -57.79 36.9
 4 3 -5 -7 8
 -4 3 5 -16.5 18.3
 4 3 -5 -10.8 14.6
 4 -3 -5 99.89 38.7
 -4 -3 5 7.3 15.6
 4 -3 -5 2.2 27.8
 4 -3 -5 0.5 4.6
 -4 -3 5 -0.1 4.6
 -4 -3 5 -40.6 31.8
 5 3 -6 85.59 23.3
 -5 3 6 51.39 35.8
 5 3 -6 85.69 19.2
 5 3 -6 62.39 13.8
 -5 3 6 52.59 27.2
 -5 -3 6 42.8 12.1
 -5 -3 6 6.9 39.7
 5 -3 -6 26.2 31.3
 5 -3 -6 73.39 14.6
 5 -3 -6 29.1 52.09
 -5 -3 6 40.5 28.5
 -6 3 7 22.8 32.9
 -6 3 7 5.5 25.3
 6 3 -7 8.4 13.3
 6 3 -7 -13.2 55.79
 -6 -3 7 19.3 39.7
 6 -3 -7 14.7 28.8
 -6 -3 7 30.6 27.7
 6 -3 -7 -60.59 39.6
 6 -3 -7 31.5 11.3
 7 3 -8 437.96 73.79
 -7 3 8 526.45 97.89
 7 3 -8 332.97 114.99
 -7 3 8 477.55 100.99
 7 -3 -8 453.05 119.39
 7 -3 -8 584.34 71.49
 -7 -3 8 731.73 113.79
 -7 -3 8 401.26 99.49
 7 -3 -8 407.96 88.49
 -7 4 6 407.46 82.09
 -7 4 6 365.66 91.09
 7 -4 -6 275.37 98.49
 -7 -4 6 326.77 90.89
 7 -4 -6 283.27 88.59
 7 -4 -6 411.26 57.29
 -7 -4 6 549.95 101.39
 6 4 -5 104.69 27.4
 -6 4 5 123.59 42
 -6 4 5 99.69 44.3
 6 4 -5 152.78 28.2
 -6 -4 5 105.59 55.79
 6 -4 -5 178.78 70.49
 -6 -4 5 173.98 49.7
 -6 -4 5 190.08 25.4
 6 -4 -5 70.89 49.7
 6 -4 -5 155.78 26.6
 -5 4 4 106.49 35.6
 -5 4 4 109.19 38
 5 4 -4 88.29 22.8
 5 4 -4 210.38 72.09
 5 4 -4 76.89 19.8
 5 -4 -4 23.8 48.8
 -5 -4 4 76.19 33.8
 -5 -4 4 95.39 52.89
 -5 -4 4 112.89 18.3
 5 -4 -4 157.88 54.29
 5 -4 -4 119.99 30.6
 5 -4 -4 88.29 18.5
 -4 4 3 32.7 21.7
 4 4 -3 24.1 11.9
 -4 4 3 36.9 22.6
 4 4 -3 81.09 49.9
 4 4 -3 38.6 11.3
 4 -4 -3 38.5 15
 4 -4 -3 4.6 30.6
 -4 -4 3 22.7 40
 -4 -4 3 66.59 24.9
 4 -4 -3 30.7 8.7
 -4 -4 3 15.6 7.5
 3 4 -2 1815.32 226.28
 -3 4 2 1713.83 233.68
 3 4 -2 1922.61 227.08
 -3 4 2 1765.72 231.28
 -3 -4 2 1666.43 224.78
 3 -4 -2 1608.44 229.18
 3 -4 -2 1594.84 234.58
 -3 -4 2 1279.27 246.78
 -3 -4 2 2024.8 231.08
 -2 4 1 1260.67 160.08
 2 4 -1 1393.56 157.58
 2 4 -1 1231.88 159.28
 -2 4 1 986.9 161.58
 -2 -4 1 1120.49 175.38
 2 -4 -1 1346.17 161.18
 -2 -4 1 1133.89 157.38
 2 -4 -1 1414.96 163.38
 -2 -4 1 1014 158.38
 1 4 0 3036.7 415.56
 1 -4 0 3443.96 419.36
 1 -4 0 3342.77 418.06
 0 4 1 47.2 8.7
 0 4 1 37.6 8.8
 0 -4 -1 45.8 14.6
 0 -4 -1 50.89 10
 0 -4 1 25.6 17.1
 -1 4 2 2623.04 333.87
 -1 4 2 2767.62 332.47
 1 -4 -2 2642.14 331.97
 -1 -4 2 2160.68 343.47
 -1 -4 2 2548.55 333.57
 2 4 -3 13.3 7.4
 2 4 -3 13.7 25.6
 -2 4 3 42.5 16.3
 -2 4 3 9.6 10.8
 -2 -4 3 -0.1 5.9
 -2 -4 3 4.3 6.2
 2 -4 -3 -8.4 8.7
 2 -4 -3 -9.7 13.9
 -2 -4 3 30.3 30.4
 -3 4 4 573.24 92.49
 -3 4 4 423.76 92.59
 3 4 -4 798.62 117.09
 3 4 -4 663.53 83.19
 3 -4 -4 665.13 99.29
 -3 -4 4 548.25 82.49
 -3 -4 4 554.34 113.69
 3 -4 -4 775.42 90.09
 -3 -4 4 667.43 88.39
 -4 4 5 368.56 56.29
 4 4 -5 157.98 64.29
 -4 4 5 276.17 55.09
 -4 -4 5 310.17 74.69
 4 -4 -5 257.67 36.8
 4 -4 -5 299.97 69.39
 -4 -4 5 288.17 51.29
 -4 -4 5 229.28 36.9
 -5 4 6 894.01 134.19
 5 4 -6 547.55 150.78
 5 4 -6 747.53 119.89
 -5 4 6 788.82 155.78
 5 -4 -6 747.63 146.69
 -5 -4 6 938.71 117.99
 -5 -4 6 934.51 150.48
 5 -4 -6 1039.5 119.29
 -5 -4 6 1090.79 134.09
 -6 4 7 250.57 63.89
 -6 4 7 268.27 63.19
 6 4 -7 162.08 83.09
 -6 -4 7 229.18 32.4
 6 -4 -7 81.49 62.39
 6 -4 -7 171.68 32.6
 -6 -4 7 307.17 75.79
 -7 4 8 90.79 46.6
 -7 4 8 100.79 47.6
 7 4 -8 69.29 73.89
 7 -4 -8 128.89 25.5
 -7 -4 8 133.99 48.2
 7 -4 -8 79.39 39.7
 -7 -4 8 60.29 54.39
 7 -4 -8 19.1 61.49
 -7 5 6 34.6 36.1
 -7 5 6 3.7 29.2
 7 -5 -6 5.8 9.6
 7 -5 -6 -39 28.9
 -7 -5 6 -0.2 33.1
 -7 -5 6 3.6 42.8
 7 -5 -6 -61.09 49.3
 6 5 -5 280.87 42.6
 -6 5 5 228.68 62.49
 -6 5 5 142.49 55.79
 6 -5 -5 291.17 89.89
 6 -5 -5 231.68 74.89
 -6 -5 5 277.27 39.4
 6 -5 -5 249.18 40.2
 -6 -5 5 401.96 88.29
 -6 -5 5 283.67 71.49
 -5 5 4 -3.2 25.2
 5 5 -4 0.3 9.6
 5 -5 -4 12 16.8
 5 -5 -4 -39.7 40.2
 -5 -5 4 -33 41.1
 5 -5 -4 4.2 6.5
 -5 -5 4 -8.7 4.9
 5 -5 -4 -20.5 34.4
 -5 -5 4 -3.1 23.9
 4 5 -3 1330.07 162.38
 -4 5 3 1354.96 169.18
 -4 5 3 1016.4 171.18
 -4 -5 3 1087.79 168.28
 4 -5 -3 1157.18 165.18
 4 -5 -3 1244.08 176.48
 -4 -5 3 1337.77 190.98
 4 -5 -3 1272.57 159.48
 -4 -5 3 1202.08 159.88
 3 5 -2 14.3 11.1
 -3 5 2 9.1 18.6
 3 -5 -2 -7.5 21.5
 -3 -5 2 -2.6 7.2
 -3 -5 2 59.09 18
 3 -5 -2 -3.3 12.4
 -2 5 1 395.16 48.2
 -2 5 1 263.77 49.7
 2 5 -1 317.77 48
 2 -5 -1 359.86 49.8
 2 -5 -1 347.67 48.6
 -2 -5 1 319.47 44.5
 -2 -5 1 238.18 69.09
 -2 -5 1 265.07 44.3
 -1 5 0 49.5 16.1
 1 -5 0 47.1 13.5
 -1 -5 0 80.39 23.6
 1 -5 0 101.29 18.9
 1 5 -2 144.69 33.8
 -1 5 2 100.59 20.2
 -1 5 2 131.39 22
 -1 5 2 48.7 32.1
 1 -5 -2 133.39 22
 1 -5 -2 111.59 22.5
 -2 5 3 2695.43 375.36
 -2 5 3 2850.01 374.06
 -2 5 3 2683.73 372.56
 -2 -5 3 3126.99 370.06
 -2 -5 3 3327.67 370.66
 2 -5 -3 3162.28 373.16
 -2 -5 3 2811.62 386.96
 -2 -5 3 2438.16 369.76
 2 -5 -3 2746.63 374.66
 -3 5 4 90.49 23.9
 3 5 -4 30.1 36.7
 3 5 -4 23 11.9
 -3 5 4 47.2 18.6
 3 -5 -4 65.19 27.5
 -3 -5 4 35 9.3
 -3 -5 4 -18.4 36
 3 -5 -4 0.8 26.1
 -3 -5 4 94.49 22
 3 -5 -4 57.49 18.9
 -4 5 5 243.58 48.4
 4 5 -5 96.79 61.69
 -4 5 5 172.88 41.2
 -4 -5 5 168.88 62.29
 4 -5 -5 133.89 45
 -4 -5 5 216.88 42.1
 4 -5 -5 254.57 69.59
 4 -5 -5 172.98 26.7
 -4 -5 5 173.88 27.6
 -5 5 6 23.4 26.6
 -5 5 6 28.5 29.1
 5 5 -6 10.2 49.5
 5 -5 -6 -2.3 29.5
 -5 -5 6 50.09 11.6
 5 -5 -6 46.6 11.8
 5 -5 -6 69.79 42.5
 -5 -5 6 18.4 22.7
 -5 -5 6 137.49 70.79
 6 5 -7 294.27 93.79
 -6 5 7 280.07 66.69
 -6 5 7 231.08 59.59
 6 -5 -7 167.68 59.99
 -6 -5 7 229.68 59.79
 6 -5 -7 271.07 85.09
 6 -5 -7 331.27 43
 -6 -5 7 321.97 42
 -6 -5 7 400.06 89.79
 -7 5 8 1.3 34
 -7 5 8 -57.89 27.5
 -7 -5 8 7.4 31.7
 7 -5 -8 35.7 63.29
 7 -5 -8 24 13
 -7 -5 8 34.4 47.6
 7 -5 -8 16.7 34
 -7 6 6 242.18 65.69
 -7 6 6 195.68 65.19
 -7 -6 6 319.57 42.8
 7 -6 -6 323.37 45
 -7 -6 6 245.28 83.09
 7 -6 -6 121.09 87.59
 7 -6 -6 305.87 96.59
 -6 6 5 159.48 48.3
 -6 6 5 157.58 56.19
 6 -6 -5 62.69 56.09
 6 -6 -5 268.17 33.5
 -6 -6 5 226.58 32.1
 -6 -6 5 241.18 75.99
 6 -6 -5 256.37 72.59
 -6 -6 5 141.59 50.59
 -5 6 4 68.69 36.3
 -5 6 4 116.09 32.5
 5 6 -4 54.29 18.6
 5 -6 -4 94.19 47
 5 -6 -4 71.99 23
 -5 -6 4 82.29 16.5
 5 -6 -4 66.99 49.4
 5 -6 -4 73.59 15.5
 -5 -6 4 78.79 76.19
 -5 -6 4 54.09 29.9
 -4 6 3 90.69 25.5
 4 6 -3 135.89 28.1
 -4 6 3 24.4 25.5
 4 -6 -3 66.09 21.4
 -4 -6 3 80.79 17.7
 4 -6 -3 26.8 50.39
 -4 -6 3 61.99 51.29
 4 -6 -3 108.29 36.6
 -4 -6 3 60.09 24.2
 -3 6 2 1108.19 139.09
 3 6 -2 977.3 138.59
 -3 6 2 884.41 142.39
 3 -6 -2 1037.5 143.49
 -3 -6 2 968.3 137.49
 3 -6 -2 1216.58 140.89
 -3 -6 2 1076.39 135.29
 -3 -6 2 892.71 162.38
 2 6 -1 1214.28 195.28
 -2 6 1 1286.87 196.28
 -2 6 1 1613.64 192.98
 2 -6 -1 1537.65 194.28
 2 -6 -1 1531.95 219.08
 2 -6 -1 1686.43 195.98
 -1 6 0 680.43 110.49
 1 -6 0 939.01 110.49
 -1 -6 0 853.81 113.09
 0 6 1 305.47 40.8
 0 6 1 200.38 65.29
 0 -6 -1 368.76 41.8
 0 -6 1 242.98 41.7
 -1 6 2 602.34 72.69
 -1 6 2 458.45 72.09
 1 -6 -2 440.16 71.49
 1 -6 -2 538.35 71.09
 1 -6 -2 557.54 72.49
 -2 6 3 20.9 20.1
 2 -6 -3 130.79 25
 -2 -6 3 -2.9 49
 -2 -6 3 38.4 13.3
 -3 6 4 463.15 77.39
 -3 6 4 620.94 77.59
 3 -6 -4 499.75 81.29
 -3 -6 4 522.05 98.79
 3 -6 -4 553.24 75.29
 -3 -6 4 462.75 69.49
 -4 6 5 274.77 60.79
 -4 6 5 321.97 59.79
 -4 -6 5 271.37 45.6
 -4 -6 5 434.46 91.99
 4 -6 -5 423.66 74.89
 -4 -6 5 417.66 59.09
 -5 6 6 694.03 117.19
 -5 6 6 764.32 114.59
 -5 -6 6 762.12 115.39
 -5 -6 6 786.12 101.39
 5 -6 -6 646.54 127.09
 -5 -6 6 854.31 143.09
 5 -6 -6 769.82 100.99
 -6 6 7 99.99 40.7
 -6 6 7 171.98 43
 6 -6 -7 78.49 44.5
 -6 -6 7 168.38 45
 -6 -6 7 145.09 24
 6 -6 -7 110.49 61.29
 6 -6 -7 130.09 24.3
 -6 -6 7 176.58 63.69
 -7 6 8 87.99 40.3
 -7 -6 8 95.79 19.7
 7 -6 -8 97.79 20.9
 7 -6 -8 57.49 68.29
 -7 -6 8 35.1 41.3
 7 -6 -8 70.69 42.8
 -7 7 6 53.69 37
 -7 -7 6 47.9 14.3
 7 -7 -6 -8.1 59.89
 7 -7 -6 45.7 15.8
 -7 -7 6 156.58 71.19
 7 -7 -6 43.1 45.2
 -6 7 5 14.1 32.7
 -6 7 5 25.7 26.9
 6 -7 -5 -8.8 39.8
 -6 -7 5 28 31.4
 -6 -7 5 -14.7 46.8
 6 -7 -5 48.4 49.2
 -6 -7 5 15 9.9
 6 -7 -5 32 10.7
 -5 7 4 608.24 110.59
 5 7 -4 559.24 97.19
 -5 7 4 831.02 105.99
 -5 -7 4 671.33 98.19
 -5 -7 4 757.82 141.79
 5 -7 -4 762.22 93.19
 5 -7 -4 781.12 122.09
 5 -7 -4 793.92 103.29
 -5 -7 4 634.04 106.89
 -4 7 3 126.09 30.6
 -4 7 3 76.19 31.7
 4 7 -3 69.59 23.8
 -4 -7 3 121.39 29.9
 -4 -7 3 98.09 61.99
 4 -7 -3 86.69 37.6
 4 -7 -3 -11.8 50.19
 4 -7 -3 113.59 28.1
 -4 -7 3 104.29 20.1
 -3 7 2 1465.55 225.18
 -3 7 2 1800.42 221.18
 3 7 -2 1418.96 221.78
 -3 -7 2 1858.81 245.58
 -3 -7 2 1495.95 218.88
 3 -7 -2 1894.51 222.98
 -3 -7 2 1758.62 218.38
 3 -7 -2 1988 227.28
 2 7 -1 16.4 24.4
 -2 7 1 53.79 18.1
 2 -7 -1 55.39 16.6
 -2 -7 1 11.3 11.4
 2 -7 -1 -37.5 17.9
 1 7 0 13.3 15.7
 -1 -7 0 36.9 16.4
 1 -7 0 56.89 14.4
 0 7 1 -18.7 22.7
 0 7 1 26.1 8.9
 0 -7 -1 -4.7 23.6
 -1 7 2 2810.12 381.56
 1 -7 -2 3143.79 384.66
 1 -7 -2 3005.4 383.56
 -2 -7 3 -13.2 48.7
 -3 7 4 2100.69 287.37
 -3 7 4 2250.17 284.97
 -3 7 4 2088.69 288.47
 -3 -7 4 1983.1 280.37
 3 -7 -4 2510.55 285.77
 3 -7 -4 2209.28 289.57
 -3 -7 4 2014.1 302.47
 -4 7 5 22.5 21.8
 -4 7 5 20.6 18.2
 4 -7 -5 46.6 34.3
 4 -7 -5 -34.8 29.8
 -4 -7 5 69.89 56.79
 -4 -7 5 3.9 6.9
 -4 -7 5 -6.6 13.8
 -5 7 6 52.99 28.3
 -5 7 6 79.69 32.7
 -5 -7 6 88.69 57.29
 5 -7 -6 0.5 35.6
 -5 -7 6 93.19 29.9
 5 -7 -6 80.79 43.8
 -5 -7 6 116.19 18.5
 -6 7 7 -1.8 27
 -6 7 7 -9.2 24
 -6 -7 7 6.7 51.19
 6 -7 -7 7.2 33.2
 6 -7 -7 -2.8 6
 6 -7 -7 21.4 47
 -6 -7 7 -2.2 6.3
 -6 -7 7 13.2 26.7
 -7 7 8 592.54 92.29
 -7 7 8 369.56 88.69
 -7 -7 8 492.85 95.19
 -7 -7 8 475.15 61.79
 7 -7 -8 396.96 109.89
 7 -7 -8 263.17 85.69
 -7 -7 8 458.45 112.29
 7 -7 -8 423.26 62.29
 -7 8 6 140.29 48.1
 -7 8 6 120.79 52.69
 -7 -8 6 188.98 77.19
 7 -8 -6 180.08 76.49
 7 -8 -6 153.58 29.4
 7 -8 -6 156.98 62.09
 -7 -8 6 154.18 27.9
 -6 8 5 130.49 42.6
 -6 8 5 128.19 47.5
 -6 -8 5 284.87 86.79
 6 -8 -5 198.08 30.3
 -6 -8 5 187.88 30.5
 6 -8 -5 266.87 72.39
 -5 8 4 46.4 25.4
 5 8 -4 26.1 18.3
 -5 8 4 18.6 25.4
 5 -8 -4 39.8 10.8
 5 -8 -4 68.59 38.2
 5 -8 -4 5.9 45.7
 -5 -8 4 23.9 10.9
 -5 -8 4 13.3 23.6
 5 -8 -4 20.5 17.5
 -5 -8 4 33.8 54.59
 -4 8 3 43.3 27.2
 -4 8 3 72.89 27
 4 8 -3 140.69 39.2
 4 -8 -3 60.29 35.6
 -4 -8 3 66.29 23.2
 -4 -8 3 48 58.19
 -4 -8 3 43.3 13.6
 4 -8 -3 -10.9 48.5
 4 -8 -3 47.4 19.7
 -3 8 2 204.18 38.7
 -3 8 2 166.98 46.6
 3 8 -2 366.06 58.59
 -3 -8 2 214.28 35.1
 3 -8 -2 223.58 41.2
 3 -8 -2 154.08 60.59
 -3 -8 2 147.99 66.99
 3 -8 -2 210.28 45.3
 2 -8 -1 1165.88 238.18
 2 -8 -1 1811.02 211.28
 2 -8 -1 1642.34 212.08
 -2 -8 1 1566.24 211.68
 1 8 0 266.37 74.39
 -1 8 0 386.26 62.59
 1 -8 0 473.25 62.19
 -1 -8 0 419.06 70.49
 0 8 1 1394.86 210.78
 0 8 1 1776.12 228.58
 0 -8 -1 1461.75 225.18
 0 -8 1 1630.44 211.38
 0 -8 -1 1928.21 211.98
 -1 8 2 29.2 6.4
 1 8 -2 -55.39 33.7
 1 -8 -2 16 12.4
 1 -8 -2 34.1 36.8
 1 -8 -2 24.2 13.8
 -2 8 3 0.4 12.7
 -2 8 3 20 14.1
 2 -8 -3 4.3 10.9
 -2 -8 3 -52.79 48.9
 2 -8 -3 -23.9 35.5
 -3 8 4 99.99 29.1
 -3 8 4 115.49 32.6
 3 8 -4 52.19 26.8
 -3 8 4 116.29 30
 -3 -8 4 152.58 56.89
 3 -8 -4 75.89 29.1
 3 -8 -4 103.79 44
 -3 -8 4 168.48 28.2
 3 -8 -4 124.59 31.6
 -3 -8 4 103.09 22.7
 -4 8 5 1226.28 185.18
 -4 8 5 1288.67 178.78
 -4 8 5 1148.79 183.28
 -4 -8 5 1362.66 171.88
 -4 -8 5 1458.75 178.28
 -4 -8 5 1266.37 213.48
 4 -8 -5 1309.17 188.88
 -5 8 6 96.69 40.9
 -5 8 6 120.69 39.4
 -5 8 6 171.98 46.1
 -5 -8 6 176.88 74.49
 5 -8 -6 235.28 96.99
 -5 -8 6 126.59 38.3
 5 -8 -6 105.09 47
 5 -8 -6 125.39 22.1
 -5 -8 6 135.49 24.4
 -6 8 7 175.58 56.79
 -6 8 7 158.68 54.19
 -6 8 7 244.58 58.19
 6 -8 -7 129.09 58.39
 -6 -8 7 261.37 89.69
 -6 -8 7 257.17 36.7
 6 -8 -7 390.46 90.19
 -6 -8 7 284.17 64.69
 6 -8 -7 265.07 36.6
 -7 8 8 27.9 31.5
 -7 8 8 12 29.2
 -7 8 8 4.3 37.2
 -7 -8 8 37.4 36.8
 7 -8 -8 25.8 43.2
 -7 -8 8 13.1 52.99
 7 -8 -8 -24.4 57.69
 7 -8 -8 9.7 10.9
 -7 -8 8 29.4 11.6
 -7 9 6 -47.3 33.8
 -7 9 6 -34 26
 -7 -9 6 6.8 11.8
 -7 -9 6 49.2 65.09
 7 -9 -6 28.4 55.99
 7 -9 -6 6.7 10.2
 7 -9 -6 1.2 41.2
 -6 9 5 157.38 55.09
 -6 9 5 222.18 52.29
 6 -9 -5 192.78 32.7
 -6 -9 5 270.27 35
 6 -9 -5 78.59 55.09
 -6 -9 5 302.67 92.19
 6 -9 -5 271.37 74.59
 -5 9 4 229.18 50.39
 5 9 -4 184.58 45.8
 -5 9 4 192.18 57.49
 5 -9 -4 351.76 72.99
 5 -9 -4 135.49 65.79
 5 -9 -4 244.38 49
 -5 -9 4 540.95 113.59
 -5 -9 4 237.48 36.7
 -4 9 3 989.9 135.39
 4 9 -3 886.21 139.29
 -4 9 3 884.91 143.39
 4 -9 -3 1111.09 148.29
 -4 -9 3 1112.69 180.98
 -4 -9 3 949.6 129.79
 4 -9 -3 1014.9 136.09
 -3 9 2 242.38 52.49
 3 9 -2 184.68 54.79
 -3 9 2 185.88 44.8
 -3 -9 2 359.36 42.1
 3 -9 -2 229.98 51.59
 3 -9 -2 323.97 46.3
 -3 -9 2 113.89 77.29
 3 -9 -2 101.89 62.49
 -2 9 1 31.1 17.6
 2 9 -1 50.09 22.3
 -2 -9 1 72.49 21.6
 2 -9 -1 61.89 20.8
 2 -9 -1 129.79 26.2
 2 -9 -1 1.1 41.6
 1 9 0 329.87 82.19
 0 -9 1 529.25 84.89
 0 -9 1 571.94 121.29
 0 -9 -1 467.05 112.89
 0 -9 1 677.23 82.69
 0 -9 -1 741.13 85.79
 -1 9 2 694.13 76.89
 -1 9 2 345.67 118.29
 -1 -9 2 683.83 103.59
 1 -9 -2 612.14 122.69
 -1 -9 2 509.25 77.29
 1 -9 -2 517.55 85.89
 -2 9 3 695.13 114.59
 -2 9 3 646.94 111.49
 2 -9 -3 993.3 114.39
 2 -9 -3 858.91 116.39
 -2 -9 3 791.72 125.79
 -2 -9 3 809.42 146.49
 -2 -9 3 922.31 107.59
 -3 9 4 148.99 55.79
 -3 9 4 264.37 54.29
 -3 9 4 200.08 44.4
 3 -9 -4 303.27 56.09
 -3 -9 4 252.47 38.8
 3 -9 -4 113.99 56.09
 -3 -9 4 272.57 38.6
 -3 -9 4 234.08 80.59
 -4 9 5 49.2 31.6
 -4 9 5 20 23.6
 -4 9 5 54.49 29.9
 4 -9 -5 61.49 36.9
 -4 -9 5 158.28 77.39
 -4 -9 5 75.29 24.3
 -4 -9 5 88.79 17.1
 4 -9 -5 -1.6 40.9
 -5 9 6 -8.4 23.4
 -5 9 6 34.7 29.9
 -5 9 6 15.5 23.6
 -5 -9 6 1.8 7.3
 5 -9 -6 -21.7 35.3
 -5 -9 6 -21.5 56.29
 -5 -9 6 15.1 23.1
 5 -9 -6 21.5 40.2
 -6 9 7 176.58 43.8
 -6 9 7 85.09 40
 -6 9 7 104.29 42.9
 6 -9 -7 305.87 79.39
 -6 -9 7 158.48 73.69
 -6 -9 7 152.18 46
 -6 -9 7 132.09 25.5
 6 -9 -7 142.59 25
 6 -9 -7 108.39 54.19
 -7 9 8 45.1 37
 -7 9 8 42.1 34
 -7 9 8 -1.4 38.7
 -7 -9 8 30.9 20.4
 -7 -9 8 30.3 59.19
 7 -9 -8 58.59 49
 7 -9 -8 94.09 67.49
 -7 -9 8 -24.2 32.6
 -7 10 6 262.77 58.99
 -7 10 6 106.79 56.39
 -7 10 6 293.57 68.69
 -7 -10 6 178.58 88.49
 7 -10 -6 309.67 91.99
 -7 -10 6 284.07 41.3
 7 -10 -6 328.57 42.1
 7 -10 -6 161.38 73.99
 -6 10 5 -4.5 31.3
 -6 10 5 9.3 23.4
 -6 10 5 0.4 28.9
 6 -10 -5 31.6 49.5
 -6 -10 5 3.2 8.5
 6 -10 -5 7.6 7.2
 6 -10 -5 -38.2 36.5
 -6 -10 5 64.89 65.59
 -5 10 4 67.89 27.1
 -5 10 4 24.5 30
 5 10 -4 -1.5 23.6
 -5 10 4 20.5 32.1
 5 -10 -4 59.29 44.7
 5 -10 -4 12.2 33.4
 -5 -10 4 37.8 14.2
 5 -10 -4 109.69 30.9
 -5 -10 4 26.3 66.29
 4 10 -3 43.4 24.3
 -4 10 3 39.7 28
 -4 10 3 41.9 21.4
 -4 10 3 42.3 24.3
 4 -10 -3 52.29 34.3
 -4 -10 3 53.99 15.5
 -4 -10 3 -18.4 57.79
 4 -10 -3 49.3 18.9
 4 -10 -3 2.9 50.99
 -3 10 2 633.74 102.59
 -3 10 2 865.91 113.19
 3 -10 -2 745.23 103.19
 -3 -10 2 695.33 99.19
 3 -10 -2 383.16 135.79
 3 -10 -2 969.6 111.69
 -3 -10 2 679.73 144.99
 -2 10 1 34 19.2
 2 10 -1 -1.2 18.6
 2 -10 -1 45.8 17.4
 2 -10 -1 20.7 13.3
 -2 -10 1 21.9 15.1
 2 -10 -1 9.9 39.1
 -1 -10 0 2982.4 449.06
 -1 -10 0 3865.11 441.16
 1 -10 0 3381.76 441.06
 0 10 1 138.89 25.9
 0 -10 -1 -10 37
 0 -10 1 75.29 17.1
 0 -10 1 -49.9 39.6
 0 -10 -1 144.99 23.1
 0 -10 1 74.39 13.6
 -1 10 2 761.72 109.99
 -1 10 2 428.36 71.79
 -1 -10 2 496.75 65.39
 2 10 -3 57.69 30.1
 -2 10 3 36.9 12.2
 -2 10 3 70.89 23.5
 2 -10 -3 55.49 35.6
 2 -10 -3 32.4 19.6
 2 -10 -3 77.39 20.6
 -2 -10 3 47.6 18.4
 -3 10 4 834.82 126.39
 3 -10 -4 933.81 129.39
 -3 -10 4 760.62 160.88
 -3 -10 4 805.42 117.29
 -3 -10 4 935.01 133.19
 3 -10 -4 848.22 151.08
 -3 -10 4 878.61 115.99
 -4 10 5 21.4 27.6
 -4 10 5 38 27.5
 -4 10 5 56.59 24.3
 4 -10 -5 25.2 39.7
 -4 -10 5 42.5 14.5
 4 -10 -5 41 35.4
 -4 -10 5 59.49 107.89
 -4 -10 5 34.6 19.8
 -5 10 6 1079.39 153.18
 -5 10 6 995.1 162.58
 -5 10 6 807.62 158.08
 -5 -10 6 1122.79 143.89
 5 -10 -6 1279.57 172.78
 -5 -10 6 1068.89 151.58
 -5 -10 6 1585.24 204.58
 -6 10 7 5.5 25.1
 -6 10 7 45.6 32.1
 -6 10 7 62.49 30.4
 -6 -10 7 23.2 11.2
 6 -10 -7 6.6 48.3
 -6 -10 7 100.79 73.19
 6 -10 -7 6.5 39.2
 6 -10 -7 59.79 14.6
 -6 -10 7 28.7 30.3
 -7 10 8 115.79 61.39
 -7 10 8 31.5 34.3
 -7 10 8 160.68 56.29
 -7 -10 8 71.19 17.3
 7 -10 -8 191.38 76.59
 7 -10 -8 70.79 17.9
 7 -10 -8 60.19 46.7
 -7 -10 8 90.39 61.39
 -7 11 6 20.9 31.6
 -7 11 6 -25.2 36.3
 -7 11 6 48.3 39.6
 7 -11 -6 17.5 52.69
 7 -11 -6 31.8 43.2
 7 -11 -6 16 10.7
 -7 -11 6 26.9 11.8
 -7 -11 6 5.3 68.99
 -6 11 5 89.99 34.6
 -6 11 5 70.49 34.1
 -6 11 5 48.1 39.3
 -6 -11 5 82.09 19.6
 6 -11 -5 81.39 58.09
 -6 -11 5 103.59 77.19
 6 -11 -5 84.99 18.9
 6 -11 -5 87.19 52.99
 -5 11 4 759.52 122.99
 -5 11 4 860.81 138.79
 -5 11 4 559.84 125.09
 5 -11 -4 850.81 172.48
 -5 -11 4 788.32 162.78
 -5 -11 4 848.42 106.79
 5 -11 -4 785.22 115.19
 -4 11 3 347.37 75.69
 4 -11 -3 527.05 81.49
 -4 -11 3 439.96 112.59
 4 -11 -3 463.65 85.29
 -3 11 2 411.06 88.19
 3 11 -2 522.45 97.29
 3 -11 -2 599.24 81.09
 -3 -11 2 447.46 114.19
 -3 -11 2 626.34 82.19
 3 -11 -2 464.65 88.29
 -2 11 1 191.38 44.8
 2 -11 -1 303.97 46
 2 -11 -1 121.49 59.89
 -2 -11 1 267.27 50.49
 2 -11 -1 286.57 49
 -1 -11 0 146.99 48.4
 -1 -11 0 220.78 32
 1 -11 0 189.18 34.4
 0 -11 -1 784.82 115.59
 0 -11 -1 709.83 135.19
 0 -11 1 985.8 113.99
 0 -11 1 878.21 114.79
 -1 11 2 460.85 75.49
 -1 -11 2 626.24 68.69
 -1 -11 2 369.26 89.39
 1 -11 -2 368.66 95.99
 -2 11 3 585.84 94.09
 -2 -11 3 598.74 95.69
 2 -11 -3 650.33 125.99
 2 -11 -3 678.43 94.39
 -3 11 4 20.2 27.1
 -3 11 4 18.6 22
 -3 -11 4 58.09 19.1
 -3 -11 4 60.09 66.59
 3 -11 -4 59.29 33.6
 -3 -11 4 87.89 16.4
 3 -11 -4 72.99 52.09
 -4 11 5 140.09 40.6
 -4 11 5 201.18 55.09
 -4 -11 5 295.17 94.99
 4 -11 -5 105.69 57.69
 -4 -11 5 178.08 32.3
 4 -11 -5 189.08 50.39
 -5 11 6 -9.1 21.2
 -5 11 6 24.9 27
 -5 11 6 87.29 38
 5 -11 -6 71.99 48.4
 -5 -11 6 46.1 60.89
 5 -11 -6 -15 32.4
 -5 -11 6 25.5 11.8
 -5 -11 6 -2.1 20.8
 -6 11 7 127.19 43.5
 -6 11 7 105.89 38.9
 -6 11 7 10 39.3
 6 -11 -7 78.69 51.39
 -6 -11 7 131.09 24.4
 -6 -11 7 87.69 37.6
 -6 -11 7 80.19 79.59
 6 -11 -7 102.19 20.7
 6 -11 -7 81.59 53.69
 -7 11 8 249.48 60.29
 -7 11 8 131.59 60.19
 -7 -11 8 153.08 30.1
 7 -11 -8 157.38 95.59
 7 -11 -8 93.29 57.99
 7 -11 -8 176.98 30.3
 -7 12 6 10.4 28.3
 -7 12 6 1.4 43.6
 7 -12 -6 15.2 54.99
 7 -12 -6 17 48.5
 7 -12 -6 54.69 14.9
 -7 -12 6 20.2 12.3
 -6 12 5 169.68 59.29
 -6 12 5 147.09 53.49
 6 -12 -5 76.99 58.79
 6 -12 -5 209.88 31.7
 6 -12 -5 246.98 71.69
 -6 -12 5 200.38 34.5
 -6 -12 5 155.98 86.79
 -5 12 4 -18.8 29.2
 -5 12 4 -35.5 20.2
 5 12 -4 -29.9 25.8
 5 -12 -4 25.7 49.4
 -5 -12 4 -2.6 9.7
 -5 -12 4 43.5 72.59
 5 -12 -4 10.1 33.8
 4 12 -3 21.6 31.9
 -4 12 3 14 30.5
 -4 12 3 25.5 21.7
 -4 -12 3 29.7 16.9
 4 -12 -3 46.8 19.3
 4 -12 -3 60.29 51.99
 4 -12 -3 52.69 32.8
 -4 -12 3 50.39 68.39
 -3 12 2 -3.2 24.6
 3 12 -2 -45 32.1
 3 -12 -2 18.1 26.7
 -3 -12 2 -64.59 54.09
 -3 -12 2 16.6 19
 3 -12 -2 76.79 54.69
 3 -12 -2 66.59 22.5
 2 -12 -1 1484.85 202.38
 -2 -12 1 1618.44 199.58
 -2 -12 1 1317.17 205.68
 2 -12 -1 1592.04 200.78
 1 -12 0 0.2 10.8
 -1 -12 0 34.8 24.8
 1 -12 0 -21.4 34.6
 -1 -12 0 -7.6 4.6
 0 -12 -1 859.61 122.29
 0 -12 -1 649.43 142.69
 0 -12 1 972.7 120.19
 0 -12 1 1013.7 121.49
 -1 12 2 -13.4 14.5
 -1 -12 2 32.5 28.8
 1 -12 -2 -31.2 39.6
 -2 12 3 63.09 22.5
 2 -12 -3 43.7 23.4
 -2 -12 3 13.9 20.3
 2 -12 -3 -1.6 39.3
 -3 12 4 -11.3 19.9
 -3 12 4 -13.2 14.6
 -3 -12 4 -12.8 12.7
 -3 -12 4 -110.19 60.29
 3 -12 -4 8.8 30
 3 -12 -4 -33.4 37.2
 -4 12 5 630.84 101.09
 -4 12 5 658.53 110.79
 -4 -12 5 933.21 162.58
 4 -12 -5 454.95 130.69
 -4 -12 5 736.73 95.09
 4 -12 -5 773.62 115.99
 -5 12 6 33.6 30.4
 -5 12 6 -23.3 27.7
 -5 -12 6 -10.8 57.99
 5 -12 -6 -13.7 33.7
 -5 -12 6 1.1 9.8
 5 -12 -6 11.8 48.9
 -6 12 7 381.36 71.59
 -6 12 7 274.57 70.49
 -6 12 7 309.67 83.59
 6 -12 -7 484.25 101.69
 -6 -12 7 360.96 52.79
 6 -12 -7 341.97 50.39
 -6 -12 7 273.87 153.78
 6 -12 -7 257.97 91.49
 -6 13 5 65.99 36.6
 6 -13 -5 106.69 53.49
 -6 -13 5 101.79 21.1
 -6 -13 5 232.48 94.89
 6 -13 -5 40.4 13
 6 -13 -5 51.59 61.09
 -5 13 4 198.98 57.29
 -5 13 4 229.08 50.89
 -5 -13 4 334.07 44.2
 5 -13 -4 182.68 72.59
 -5 -13 4 190.38 86.69
 5 -13 -4 222.48 62.79
 -4 13 3 150.78 49.5
 4 13 -3 103.79 49.4
 4 -13 -3 226.48 46.5
 -4 -13 3 258.97 40.3
 4 -13 -3 173.98 72.19
 4 -13 -3 188.08 53.09
 -4 -13 3 549.85 129.89
 -3 13 2 337.27 86.09
 3 13 -2 334.97 102.39
 -3 -13 2 629.64 84.09
 3 -13 -2 568.54 87.99
 3 -13 -2 563.74 78.69
 2 13 -1 14.7 45.7
 2 -13 -1 42.9 41
 -2 -13 1 15.5 22.1
 2 -13 -1 -12.5 10.5
 2 -13 -1 30.1 24.5
 -2 -13 1 5.7 7.6
 1 13 0 142.89 59.09
 1 -13 0 17.9 49
 -1 -13 0 96.99 20.6
 -1 -13 0 46.9 31.5
 1 -13 0 95.09 23.3
 0 13 1 107.89 59.89
 0 -13 1 47.7 50.39
 0 -13 1 197.68 29.3
 0 -13 1 161.58 25.7
 0 -13 -1 375.46 88.59
 0 -13 -1 129.39 32
 -1 13 2 1278.77 190.08
 -1 -13 2 1556.14 211.78
 1 -13 -2 1532.35 224.18
 -2 -13 3 68.69 30.6
 2 -13 -3 126.59 35.5
 2 -13 -3 48.1 55.39
 -3 13 4 1065.69 195.88
 -3 -13 4 1633.24 194.78
 3 -13 -4 1496.15 200.18
 -4 13 5 64.69 26.8
 -4 13 5 62.69 32
 -4 -13 5 51.89 18.4
 -4 -13 5 41.8 72.69
 4 -13 -5 33.5 46.9
 4 -13 -5 58.99 39.6
 -5 13 6 21.5 27.8
 -5 13 6 -27.8 18.4
 5 -13 -6 54.39 52.89
 5 -13 -6 -6 32.7
 -5 -13 6 30.4 13.2
 -5 -13 6 -55.79 54.49
 -6 13 7 22.2 37.9
 -6 13 7 55.29 37.4
 -6 -13 7 27.8 15.2
 6 -13 -7 21.7 55.79
 6 -13 -7 28.2 10.4
 6 -13 -7 23.9 44.3
 -6 -13 7 25.1 82.79
 -6 14 5 59.69 38.1
 -6 14 5 150.98 24.4
 6 -14 -5 -5 49.8
 -6 -14 5 105.29 23.6
 6 -14 -5 152.28 59.89
 -6 -14 5 54.39 86.19
 -5 14 4 34.7 8.8
 -5 14 4 18.3 18.5
 -5 14 4 6.9 30.8
 5 -14 -4 -1.2 49.2
 -5 -14 4 -13.8 64.09
 5 -14 -4 5.4 33.3
 -5 -14 4 5.4 13.8
 -4 14 3 26.6 32.5
 4 14 -3 31.5 39.8
 4 -14 -3 22.9 32.6
 -4 -14 3 208.88 86.09
 4 -14 -3 11 16
 4 -14 -3 3.6 47
 -4 -14 3 1.8 14.1
 -3 -14 2 526.85 142.79
 -3 -14 2 584.34 89.59
 3 -14 -2 380.16 128.19
 3 -14 -2 611.34 93.39
 2 14 -1 103.99 58.29
 -2 -14 1 90.69 38.2
 -2 -14 1 202.38 31.6
 2 -14 -1 180.78 36.9
 2 -14 -1 428.36 113.89
 -1 -14 0 1315.87 157.28
 1 -14 0 1198.78 156.38
 -1 -14 0 906.21 173.38
 0 14 1 35.3 54.79
 0 -14 1 96.89 19.6
 0 -14 -1 55.99 17.9
 0 -14 -1 10.8 43.7
 0 -14 1 44 56.29
 -1 14 2 44.5 23.8
 -1 -14 2 54.19 14
 1 -14 -2 56.09 55.09
 -2 14 3 17.1 23
 -2 -14 3 16.6 24.1
 2 -14 -3 15 24.7
 2 -14 -3 -7.3 52.89
 -3 14 4 52.69 29.8
 -3 -14 4 52.49 22.3
 3 -14 -4 63.89 35
 -3 -14 4 32.2 67.09
 3 -14 -4 58.19 59.39
 -4 14 5 27.6 17.7
 -4 14 5 -20.8 24.7
 4 -14 -5 1.3 52.59
 4 -14 -5 1.6 32.7
 -4 -14 5 31.4 16.5
 -4 -14 5 -3.8 74.69
 -5 14 6 545.75 111.59
 -5 14 6 526.95 100.39
 5 -14 -6 870.41 124.39
 5 -14 -6 471.45 140.09
 -5 -14 6 717.93 91.49
 -5 -14 6 728.93 166.58
 -6 14 7 41 28
 -6 14 7 43.4 40
 -6 -14 7 32.3 19.8
 -6 -14 7 -63.79 74.39
 6 -14 -7 72.39 48.2
 6 -14 -7 33 54.89
 -6 15 5 13.5 22.5
 -6 -15 5 93.49 23.1
 -6 -15 5 72.29 81.39
 6 -15 -5 100.99 54.19
 6 -15 -5 79.69 66.89
 -5 -15 4 60.89 86.29
 -5 -15 4 6.6 14.1
 5 -15 -4 24.1 59.09
 5 -15 -4 13.4 37.1
 -4 -15 3 508.65 142.99
 -4 -15 3 728.53 97.69
 4 -15 -3 630.84 112.29
 3 15 -2 -16.2 45
 -3 -15 2 149.88 86.99
 3 -15 -2 15.4 16.4
 3 -15 -2 7.8 47.7
 -3 -15 2 22.7 19.9
 3 -15 -2 -18 26.1
 -3 -15 2 15.5 11.3
 2 15 -1 -52.49 43.5
 2 -15 -1 19.5 25.1
 -2 -15 1 4.2 21.3
 -2 -15 1 17.9 9.5
 2 -15 -1 -54.39 46.5
 2 -15 -1 -6.2 10.4
 1 15 0 -27 49.8
 -1 -15 0 32.4 12.9
 -1 -15 0 60.39 35.2
 1 -15 0 0 50.99
 1 -15 0 19 14
 0 -15 -1 414.06 67.19
 0 -15 -1 307.07 87.09
 0 -15 1 410.06 107.19
 0 -15 1 467.45 60.79
 -1 -15 2 105.39 22.9
 -1 -15 2 107.79 49.4
 1 -15 -2 125.59 60.69
 -2 15 3 801.12 146.19
 2 -15 -3 934.61 182.98
 2 -15 -3 1227.08 149.99
 -2 -15 3 1178.78 158.88
 -3 15 4 262.57 57.09
 3 -15 -4 -2.2 54.09
 -3 -15 4 104.99 31.9
 -3 -15 4 52.29 75.29
 3 -15 -4 115.89 41.8
 -4 15 5 102.59 38.1
 4 -15 -5 16.1 54.69
 4 -15 -5 108.69 43.3
 -4 -15 5 78.89 80.79
 -4 -15 5 79.19 23.8
 -5 15 6 59.09 27
 -5 15 6 47.5 33.5
 5 -15 -6 -56.69 34.3
 -5 -15 6 12.3 14.7
 5 -15 -6 39.7 61.99
 -5 -15 6 45.9 77.39
 -6 15 7 37.3 39.2
 -6 15 7 56.39 36.1
 -6 -15 7 60.99 17.8
 6 -15 -7 129.69 77.29
 6 -15 -7 69.29 49.3
 6 -16 -5 358.16 84.69
 -6 -16 5 167.18 39.9
 6 -16 -5 157.88 80.79
 -6 -16 5 272.27 55.19
 5 -16 -4 13 55.69
 -5 -16 4 24.6 18
 -5 -16 4 -7.7 13.7
 5 -16 -4 81.69 44.8
 -5 -16 4 -31.4 79.59
 -4 -16 3 39 20.5
 4 -16 -3 16.9 53.19
 -4 -16 3 34.7 17.2
 -4 -16 3 49.6 78.59
 4 -16 -3 78.79 40.3
 -3 -16 2 103.69 87.99
 -3 -16 2 191.48 41.2
 3 -16 -2 196.78 61.69
 3 -16 -2 240.68 48.8
 -3 -16 2 335.47 60.29
 3 -16 -2 156.28 74.09
 2 -16 -1 440.06 68.99
 2 -16 -1 253.97 97.99
 -2 -16 1 503.85 67.19
 -2 -16 1 473.15 88.59
 2 -16 -1 403.16 75.09
 -1 -16 0 666.53 117.99
 1 -16 0 758.02 91.09
 1 -16 0 361.46 123.99
 -1 -16 0 591.84 89.49
 0 -16 1 158.48 68.79
 0 -16 -1 186.78 41.8
 0 -16 -1 182.38 63.19
 0 -16 1 224.28 35.5
 -1 -16 2 98.39 51.39
 -1 -16 2 109.09 22.9
 1 -16 -2 43.2 52.49
 -2 16 3 26.5 25.1
 2 -16 -3 7.2 51.79
 -2 -16 3 1.1 22.9
 -2 -16 3 12.7 10
 -3 -16 4 122.59 35.4
 -3 -16 4 158.28 84.69
 3 -16 -4 117.59 43
 3 -16 -4 120.29 73.89
 -4 16 5 163.28 50.59
 4 -16 -5 193.98 57.99
 -4 -16 5 260.77 103.29
 4 -16 -5 225.28 84.39
 -4 -16 5 170.98 37.6
 -5 16 6 191.88 61.69
 -5 -16 6 287.67 50.39
 5 -16 -6 248.88 91.79
 -5 -16 6 374.26 130.39
 5 -16 -6 359.46 84.69
 -5 -17 4 420.56 72.19
 -5 -17 4 228.78 112.49
 -5 -17 4 428.86 67.59
 5 -17 -4 477.15 101.99
 4 -17 -3 12.4 52.09
 4 -17 -3 4 33.9
 -4 -17 3 33.5 17.1
 -4 -17 3 -2.6 17.5
 -4 -17 3 18.4 72.89
 -3 -17 2 642.44 156.48
 -3 -17 2 591.94 85.79
 3 -17 -2 475.65 95.69
 -3 -17 2 602.14 97.49
 2 -17 -1 78.79 61.09
 -2 -17 1 4.6 27
 2 -17 -1 -46.5 47.3
 -2 -17 1 -4.4 7.3
 1 -17 0 169.28 74.39
 -1 -17 0 144.69 32.9
 -1 -17 0 118.59 45.8
 0 -17 -1 14.2 23.8
 0 -17 1 -11.5 43.1
 0 -17 -1 -28.1 38.8
 -1 -17 2 688.23 85.29
 1 -17 -2 430.26 136.19
 -1 -17 2 459.55 120.79
 2 -17 -3 64.29 59.29
 2 -17 -3 171.88 45.2
 -2 -17 3 139.69 30.5
 -2 -17 3 150.58 49.99
 -3 17 4 352.16 92.39
 3 -17 -4 393.26 131.89
 3 -17 -4 571.84 95.09
 -3 -17 4 583.64 148.79
 -3 -17 4 670.53 94.19
 -4 17 5 20.6 33.5
 -4 -17 5 -24 14.3
 4 -17 -5 9.5 38.6
 -4 -17 5 49.2 83.89
 4 -17 -5 -45.1 45.3
 -5 17 6 -49.5 29.5
 -5 -17 6 -2.8 14.4
 5 -17 -6 8.2 40
 -5 -17 6 47.2 85.19
 5 -17 -6 1.2 54.29
 -5 -18 4 35.7 92.69
 -5 -18 4 23.4 20
 5 -18 -4 34 45.2
 -5 -18 4 18.4 15.9
 5 -18 -4 -9.9 54.79
 -4 -18 3 13.7 83.69
 4 -18 -3 1.8 35.2
 -4 -18 3 -1.3 9.7
 -4 -18 3 -22 18.3
 4 -18 -3 -20.2 56.19
 -3 -18 2 -36.4 73.29
 -3 -18 2 75.29 31.2
 3 -18 -2 90.29 38
 3 -18 -2 108.79 73.19
 -3 -18 2 59.89 24
 2 -18 -1 575.94 99.59
 -2 -18 1 676.03 91.89
 2 -18 -1 500.85 149.09
 -1 -18 0 335.17 53.59
 1 -18 0 227.58 85.09
 -1 -18 0 262.37 75.79
 0 -18 -1 305.27 85.29
 0 -18 -1 372.46 73.49
 0 -18 1 312.67 87.79
 -1 -18 2 51.39 16.1
 1 -18 -2 19.4 49.8
 -1 -18 2 22.9 41.8
 2 -18 -3 15.8 27.1
 -2 -18 3 4.9 31.4
 -2 -18 3 -6.8 7.6
 2 -18 -3 -43.6 38
 3 -18 -4 79.59 39.9
 -3 -18 4 97.59 83.39
 3 -18 -4 68.29 51.39
 -3 -18 4 71.09 30.8
 -4 -18 5 413.26 69.99
 -4 -18 5 686.23 170.48
 4 -18 -5 394.76 91.79
 4 -18 -5 325.97 110.19
 -5 -18 6 101.19 115.19
 5 -18 -6 127.19 55.89
 -5 -18 6 103.89 29.1
 5 -18 -6 68.79 60.39
 -4 -19 3 489.05 78.49
 4 -19 -3 536.75 100.39
 -4 -19 3 234.18 121.09
 4 -19 -3 291.87 108.19
 -4 -19 3 549.54 77.99
 -3 -19 2 39.5 17.2
 -3 -19 2 11.3 74.49
 3 -19 -2 27.8 33.6
 3 -19 -2 2.4 65.39
 -3 -19 2 53.19 28.5
 -2 -19 1 6.8 12.2
 2 -19 -1 -33.3 50.79
 -2 -19 1 3 29.4
 2 -19 -1 -23.3 25.4
 1 -19 0 1.5 49.99
 -1 -19 0 -5.3 13.7
 -1 -19 0 -0.6 36
 0 -19 1 166.48 67.69
 0 -19 -1 129.29 61.39
 1 -19 -2 30.9 51.49
 1 -19 -2 23.8 27.9
 -1 -19 2 32.8 13.9
 -1 -19 2 35.3 39.1
 2 -19 -3 466.15 87.29
 -2 -19 3 545.65 75.59
 2 -19 -3 500.45 139.69
 -2 -19 3 415.36 102.79
 -3 -19 4 93.89 36.2
 3 -19 -4 34.6 61.29
 -3 -19 4 67.69 21.2
 -3 -19 4 70.09 84.89
 3 -19 -4 106.59 44.2
 -4 -19 5 43.9 83.89
 4 -19 -5 30.9 43.4
 -4 -19 5 76.49 22.9
 -4 -19 5 38.3 22.7
 4 -19 -5 49.6 56.29
 -4 -20 3 18.1 23.6
 -4 -20 3 21 14.7
 -4 -20 3 214.68 101.49
 4 -20 -3 -16.7 61.29
 4 -20 -3 11.6 38.1
 -3 -20 2 284.77 51.99
 3 -20 -2 192.28 57.49
 3 -20 -2 243.08 113.49
 -3 -20 2 391.26 183.18
 -3 -20 2 269.07 70.39
 -2 -20 1 28.5 18.5
 2 -20 -1 6.9 30.7
 2 -20 -1 55.29 69.29
 -2 -20 1 10.5 30.8
 1 -20 0 455.45 137.89
 -1 -20 0 547.35 112.29
 -1 -20 0 525.65 82.99
 0 -20 1 124.59 58.29
 0 -20 -1 37.6 48.6
 -1 -20 2 152.58 34.4
 1 -20 -2 159.58 45.5
 -1 -20 2 163.98 60.29
 1 -20 -2 90.59 63.19
 2 -20 -3 -9.6 27.1
 -2 -20 3 -5.1 31.5
 -2 -20 3 8.1 12
 2 -20 -3 -6.6 53.79
 -3 -20 4 242.98 66.59
 3 -20 -4 239.88 63.09
 -3 -20 4 264.27 47.6
 3 -20 -4 219.78 87.89
 -3 -20 4 198.38 112.89
 4 -20 -5 50.19 60.09
 -4 -20 5 251.47 103.89
 4 -20 -5 122.49 49
 -4 -20 5 106.69 33.2
 -4 -20 5 52.79 27.1
 -4 -20 5 44.9 19.9
 3 -21 -2 211.98 94.89
 -3 -21 2 240.98 47.9
 -3 -21 2 171.18 105.59
 3 -21 -2 177.38 55.89
 -3 -21 2 179.38 53.09
 2 -21 -1 23 31.8
 -2 -21 1 24.6 19.6
 -2 -21 1 9 35.2
 1 -21 0 -12.6 56.19
 -1 -21 0 56.29 23.6
 -1 -21 0 19.5 41.8
 1 -21 0 84.19 36.7
 0 -21 -1 63.69 51.49
 0 -21 1 45.6 56.69
 -1 -21 2 379.76 109.29
 1 -21 -2 472.65 118.89
 1 -21 -2 432.86 77.29
 -1 -21 2 310.17 63.59
 2 -21 -3 125.99 100.39
 2 -21 -3 219.58 56.19
 -2 -21 3 147.59 56.29
 -2 -21 3 221.58 42.4
 -3 -21 4 153.28 92.99
 3 -21 -4 147.79 81.09
 -3 -21 4 189.78 42.1
 -3 -21 4 220.78 63.99
 3 -21 -4 149.69 52.19
 -3 -22 2 23.2 29.2
 -3 -22 2 -77.99 77.69
 3 -22 -2 30.5 35.3
 -3 -22 2 0.7 18.5
 2 -22 -1 469.55 88.49
 2 -22 -1 295.87 110.89
 -2 -22 1 617.64 113.09
 -2 -22 1 412.66 79.39
 -1 -22 0 16.9 46.8
 -1 -22 0 11.4 23.8
 1 -22 0 49.2 36.1
 1 -22 0 27.3 109.79
 0 -22 -1 253.67 82.49
 0 -22 1 211.78 84.59
 -1 -22 2 -18.9 17.4
 1 -22 -2 -23.4 53.89
 -1 -22 2 -2.8 38.7
 1 -22 -2 -5.9 32.9
 2 -22 -3 0.9 32.9
 -2 -22 3 -19.5 32.8
 -2 -22 3 13.1 16.8
 2 -22 -3 7 56.59
 -3 -22 4 28 28.6
 3 -22 -4 3.8 48.6
 -3 -22 4 19.6 76.09
 -3 -22 4 -4.5 13.9
 -2 -23 1 33.2 39
 -2 -23 1 -14.2 23.7
 2 -23 -1 23.8 36.4
 -1 -23 0 33.7 44.7
 1 -23 0 9.3 59.79
 -1 -23 0 -55.59 22.3
 1 -23 0 0.7 29.6
 0 -23 -1 58.59 52.89
 0 -23 1 17.3 64.59
 -1 -23 2 364.36 107.49
 1 -23 -2 256.37 91.59
 -2 -23 3 68.29 49.5
 -2 -23 3 118.79 31.2
 2 -23 -3 188.88 52.19
 0 -24 1 20.2 51.49
 0 -24 -1 -6.3 40.6
 -8 0 6 296.77 71.69
 8 0 -6 209.08 46.2
 8 0 -6 219.08 93.69
 7 0 -5 -51.89 34.4
 7 0 -5 3.6 11.2
 -7 0 5 15 35.4
 -7 0 5 42.1 39.9
 7 0 -5 71.49 62.29
 -6 0 4 23.7 30
 6 0 -4 -92.19 46.7
 -6 0 4 -0.4 32.5
 6 0 -4 16.7 10.8
 5 0 -3 37.8 47.6
 -5 0 3 -20.1 22.4
 -5 0 3 -32 29
 5 0 -3 -20.5 10.9
 5 0 -3 3.9 8.5
 4 0 -2 1324.97 195.18
 4 0 -2 1432.66 180.98
 -4 0 2 1238.58 185.58
 4 0 -2 1338.77 176.48
 -4 0 2 1447.86 189.68
 -3 0 1 -28.7 23.3
 3 0 -1 2.9 34.9
 -3 0 1 -5.3 4.4
 3 0 -1 0.1 11.6
 -2 0 0 956.3 120.09
 2 0 0 822.92 127.09
 2 0 0 985.2 119.69
 -2 0 0 863.81 126.69
 2 0 0 934.41 123.09
 -1 0 -1 4.5 6.1
 1 0 1 2.1 7
 -1 0 -1 -0.1 1.1
 -1 0 -1 3.5 3
 1 0 1 0.3 1.3
 0 0 2 0.6 4.8
 0 0 -2 15.1 3.8
 0 0 -2 13.2 5.8
 0 0 2 12 3
 1 0 -3 1 2.5
 -1 0 3 1 1.2
 1 0 -3 -7.6 6.7
 1 0 -3 -2.3 1.2
 -1 0 3 4.9 8.8
 -1 0 3 -0.3 4.5
 -2 0 4 3563.64 410.46
 2 0 -4 2976.1 415.36
 -2 0 4 3180.28 406.96
 -2 0 4 2952.9 413.76
 2 0 -4 3198.08 407.16
 -3 0 5 -16.1 27.2
 -4 0 6 3088.49 399.36
 4 0 -6 2748.02 403.66
 4 0 -6 3088.99 385.46
 5 0 -7 -33.5 17.9
 5 0 -7 -49.3 42.7
 5 0 -7 -5.3 6.9
 -5 0 7 -6.6 28
 -5 0 7 38.2 22.2
 -6 0 8 149.49 51.09
 6 0 -8 123.69 25.1
 6 0 -8 97.49 61.19
 -6 0 8 98.99 38.3
 6 0 -8 46 35.6
 7 0 -9 -1.3 11.9
 -7 0 9 41.4 42.7
 7 0 -9 -1.7 9.8
 -7 0 9 -28.5 24.3
 7 0 -9 19.1 60.19
 -8 1 6 34.2 36.5
 8 1 -6 -23.2 15.3
 8 1 -6 0.4 16.6
 -8 -1 6 -25.1 40.8
 8 -1 -6 -8.2 66.69
 8 -1 -6 -0.9 21.4
 8 -1 -6 7.6 14.8
 7 1 -5 125.89 71.89
 -7 1 5 227.88 57.39
 7 1 -5 151.98 31.6
 -7 1 5 98.99 46.8
 7 -1 -5 65.59 65.79
 7 -1 -5 174.88 30
 -7 -1 5 114.99 51.49
 7 -1 -5 25 42.3
 -7 -1 5 175.38 54.59
 -6 1 4 624.84 104.39
 6 1 -4 548.65 126.19
 -6 1 4 519.45 106.09
 6 1 -4 564.54 81.79
 6 -1 -4 568.94 80.89
 -6 -1 4 683.93 109.19
 -6 -1 4 635.84 107.79
 6 -1 -4 522.05 123.59
 5 1 -3 827.02 115.69
 -5 1 3 1034.6 135.19
 -5 1 3 671.23 128.89
 5 1 -3 578.74 144.39
 5 1 -3 968.6 120.89
 5 -1 -3 728.33 147.89
 -5 -1 3 1135.29 141.39
 5 -1 -3 894.11 120.69
 5 -1 -3 893.01 115.19
 -5 -1 3 770.32 132.39
 4 1 -2 643.94 78.49
 -4 1 2 512.05 88.89
 4 1 -2 564.54 81.79
 4 1 -2 525.25 103.19
 -4 1 2 515.15 89.49
 4 -1 -2 510.55 98.69
 -4 -1 2 585.84 88.79
 -4 -1 2 648.54 95.49
 4 -1 -2 600.94 77.59
 -4 -1 2 590.94 76.89
 4 -1 -2 569.14 83.29
 -3 1 1 129.19 42.5
 3 1 -1 84.79 52.79
 3 1 -1 241.38 33.2
 3 -1 -1 182.98 57.59
 -3 -1 1 255.87 31.8
 -3 -1 1 216.28 54.99
 3 -1 -1 294.27 42.7
 -2 1 0 583.24 80.19
 2 1 0 463.75 83.59
 2 1 0 606.64 74.59
 2 -1 0 612.14 81.99
 -2 -1 0 484.95 78.29
 -2 -1 0 616.64 85.79
 2 -1 0 576.84 74.09
 2 -1 0 591.74 78.69
 -1 1 -1 762.42 88.09
 -1 1 -1 687.63 88.39
 1 1 1 629.64 87.09
 -1 -1 -1 648.14 86.99
 1 -1 1 629.74 88.79
 1 -1 1 690.03 86.89
 -1 -1 -1 685.13 88.49
 0 1 2 1800.52 207.18
 0 1 -2 1613.44 206.58
 0 1 2 1461.05 208.18
 0 -1 -2 1535.25 208.08
 0 -1 -2 1791.62 206.28
 0 -1 2 1527.45 206.38
 0 -1 2 1476.75 207.98
 1 1 -3 2849.01 368.96
 -1 1 3 2846.22 372.06
 1 1 -3 2753.62 374.06
 -1 1 3 2872.11 374.76
 -1 -1 3 2998.8 368.86
 1 -1 -3 2976.8 372.76
 -1 -1 3 2878.61 369.06
 -1 -1 3 2951.8 374.06
 2 1 -4 391.46 52.99
 2 1 -4 183.58 33
 2 1 -4 237.38 31.8
 -2 1 4 235.48 40.9
 -2 1 4 271.47 36.5
 -2 -1 4 267.67 45.9
 2 -1 -4 237.28 44.2
 -2 -1 4 236.38 31.3
 2 -1 -4 239.58 31.2
 3 1 -5 -1.1 5.9
 3 1 -5 -4.7 40.1
 -3 1 5 72.79 20.2
 -3 1 5 3.7 27.7
 3 -1 -5 -31.5 20.1
 -3 -1 5 -3.3 4.5
 3 -1 -5 -0.5 4.8
 -3 -1 5 20.2 34.1
 3 -1 -5 76.49 40.7
 4 1 -6 -33.6 34.6
 -4 1 6 -13.9 23.2
 4 1 -6 8.1 16
 -4 1 6 13.8 16.4
 4 1 -6 2 7
 4 -1 -6 7 20
 4 -1 -6 61.29 41.9
 -4 -1 6 -8.7 28.4
 4 -1 -6 0.2 5.2
 -5 1 7 246.08 54.49
 5 1 -7 278.97 36.6
 5 1 -7 152.08 68.29
 -5 1 7 243.88 63.59
 5 1 -7 152.08 42.9
 -5 -1 7 303.17 69.59
 -5 -1 7 242.08 54.29
 5 -1 -7 201.48 67.39
 5 -1 -7 266.87 34.9
 5 -1 -7 154.78 53.29
 6 1 -8 211.98 32.5
 6 1 -8 157.18 73.69
 -6 1 8 258.67 64.19
 6 1 -8 146.79 32.1
 -6 1 8 234.18 57.59
 -6 -1 8 141.99 45.5
 -6 -1 8 183.08 55.89
 6 -1 -8 87.99 65.49
 6 -1 -8 171.98 30.1
 6 -1 -8 126.79 35.7
 -7 1 9 288.67 69.59
 7 1 -9 226.78 44.9
 7 1 -9 93.69 80.09
 -7 1 9 263.27 69.59
 7 -1 -9 275.77 44.1
 -7 -1 9 232.48 65.59
 -7 -1 9 255.47 70.39
 7 -1 -9 151.88 83.79
 7 -1 -9 273.07 47.9
 -8 2 6 57.59 39.7
 8 2 -6 3.7 14.8
 8 2 -6 -26.5 16
 8 2 -6 10.8 8.4
 -8 -2 6 12 42.3
 8 -2 -6 67.29 31.2
 8 -2 -6 -60.29 69.29
 8 -2 -6 15.8 15.5
 -7 2 5 269.27 65.99
 -7 2 5 139.49 54.39
 7 2 -5 171.18 82.39
 7 2 -5 190.38 39.3
 7 -2 -5 181.88 35.1
 7 -2 -5 131.19 77.99
 -7 -2 5 245.38 64.99
 -7 -2 5 223.48 67.69
 6 2 -4 28.6 14.2
 6 2 -4 -61.79 45.4
 -6 2 4 43.8 33.8
 -6 2 4 21.5 34.3
 6 -2 -4 32.7 49.8
 6 -2 -4 30.4 44.9
 -6 -2 4 16.4 35.9
 6 -2 -4 13.8 10.2
 5 2 -3 255.47 40.6
 -5 2 3 257.37 62.49
 -5 2 3 217.38 56.09
 5 2 -3 280.77 47
 5 2 -3 261.47 78.79
 5 -2 -3 229.68 37.7
 -5 -2 3 222.58 54.89
 5 -2 -3 179.38 67.09
 -5 -2 3 241.88 36.7
 5 -2 -3 305.57 48.1
 -5 -2 3 377.26 74.09
 -4 2 2 303.27 56.79
 4 2 -2 296.37 41.7
 4 2 -2 276.27 44.5
 -4 2 2 299.97 55.29
 4 2 -2 240.68 62.79
 -4 -2 2 276.87 64.69
 -4 -2 2 256.17 39
 4 -2 -2 275.57 65.59
 -4 -2 2 230.08 52.39
 4 -2 -2 323.07 49.4
 4 -2 -2 300.67 40.1
 -3 2 1 633.44 98.59
 3 2 -1 418.06 112.59
 3 2 -1 629.34 91.59
 -3 2 1 564.84 98.69
 3 2 -1 696.93 88.09
 3 -2 -1 702.73 86.69
 -3 -2 1 659.63 86.79
 -3 -2 1 606.74 94.79
 3 -2 -1 833.92 94.39
 -3 -2 1 609.94 111.49
 2 2 0 645.54 82.09
 -2 2 0 748.83 86.29
 -2 2 0 514.65 86.39
 2 2 0 637.64 83.79
 2 -2 0 614.14 87.19
 2 -2 0 689.13 81.29
 -2 -2 0 678.43 81.69
 2 -2 0 531.15 86.59
 -2 -2 0 600.34 93.59
 -2 -2 0 520.85 84.69
 -1 2 -1 2478.25 296.77
 -1 2 -1 2290.17 296.57
 1 -2 1 2347.77 297.07
 -1 -2 -1 2429.96 297.77
 -1 -2 -1 2050.99 296.27
 0 2 2 437.86 60.49
 0 2 -2 387.06 60.59
 0 2 2 462.45 60.69
 0 -2 2 469.35 62.39
 0 -2 -2 529.05 60.89
 0 -2 -2 392.56 60.69
 0 -2 2 421.96 60.49
 -1 2 3 2695.83 316.47
 -1 2 3 2368.76 318.77
 1 2 -3 2322.37 319.67
 1 -2 -3 2094.69 317.47
 -1 -2 3 2595.84 320.17
 1 -2 -3 2637.24 316.97
 -1 -2 3 2484.45 313.57
 -2 2 4 530.55 71.29
 2 2 -4 537.35 67.49
 -2 2 4 541.35 74.59
 2 2 -4 373.96 82.89
 2 -2 -4 454.15 75.79
 -2 -2 4 578.04 81.69
 -2 -2 4 496.45 66.59
 3 2 -5 1731.13 225.88
 -3 2 5 1404.56 210.88
 3 2 -5 1476.65 200.68
 -3 2 5 1655.23 206.58
 3 -2 -5 1845.82 217.58
 -3 -2 5 1560.04 218.48
 -3 -2 5 1568.74 199.78
 3 -2 -5 1436.86 199.58
 4 2 -6 -30.3 35.9
 -4 2 6 50.79 28.4
 4 2 -6 -15.1 9.5
 4 -2 -6 3.9 5.9
 -4 -2 6 5.7 5.1
 4 -2 -6 -20.5 31.8
 -4 -2 6 -58.09 22.7
 -4 -2 6 -14.6 14.2
 5 2 -7 400.16 64.59
 -5 2 7 609.14 83.29
 5 2 -7 444.06 108.09
 -5 2 7 507.35 88.79
 5 2 -7 585.14 67.49
 5 -2 -7 283.27 80.19
 -5 -2 7 544.45 95.59
 -5 -2 7 641.34 83.29
 5 -2 -7 498.05 104.99
 5 -2 -7 488.05 64.59
 -6 2 8 37.1 35
 6 2 -8 48.3 15.2
 -6 2 8 40.1 29.7
 6 2 -8 24.8 54.09
 -6 -2 8 22.1 26.1
 -6 -2 8 -2.8 36.3
 6 -2 -8 17.2 10
 6 -2 -8 5.4 25.3
 6 -2 -8 35.1 53.09
 -7 2 9 26.9 36.5
 -7 2 9 -13.5 32.9
 7 2 -9 -70.99 48.8
 7 2 -9 40.9 17.9
 7 -2 -9 -20.2 51.79
 -7 -2 9 26.9 33.4
 -7 -2 9 69.19 47.7
 7 -2 -9 32.5 23.9
 7 -2 -9 19 13.2
 -8 3 6 82.39 40.1
 8 -3 -6 48.3 19
 8 -3 -6 40.6 80.89
 -8 -3 6 134.09 54.09
 8 -3 -6 9.7 31.2
 7 3 -5 9.5 10
 7 3 -5 -16.6 29.2
 7 3 -5 1 14.2
 -7 3 5 -8.4 25.4
 -7 3 5 24.8 35.1
 7 -3 -5 1.5 9.6
 -7 -3 5 24.1 38.7
 -7 -3 5 -3.4 40
 7 -3 -5 -1.3 41.8
 7 -3 -5 89.49 64.09
 6 3 -4 657.73 159.28
 -6 3 4 964.4 136.59
 -6 3 4 785.02 137.79
 6 3 -4 755.12 117.59
 -6 -3 4 916.81 114.69
 6 -3 -4 936.01 116.19
 -6 -3 4 968.5 145.99
 6 -3 -4 914.71 124.99
 6 -3 -4 761.62 152.68
 -6 -3 4 708.73 136.89
 5 3 -3 210.38 74.89
 -5 3 3 148.99 44.9
 5 3 -3 211.08 37.3
 -5 3 3 285.47 60.09
 5 -3 -3 169.68 62.49
 -5 -3 3 210.68 67.49
 5 -3 -3 224.08 33.2
 -5 -3 3 186.88 31.7
 5 -3 -3 259.57 43.7
 -5 -3 3 368.76 65.89
 -4 3 2 573.74 91.39
 4 3 -2 401.26 105.19
 -4 3 2 744.73 90.69
 4 3 -2 582.54 80.89
 4 3 -2 518.85 78.29
 -4 -3 2 520.45 102.09
 -4 -3 2 583.64 90.09
 -4 -3 2 549.74 76.59
 4 -3 -2 612.94 76.99
 4 -3 -2 599.74 84.69
 4 -3 -2 543.15 99.29
 -3 3 1 20.4 22.9
 3 3 -1 24.9 11.5
 -3 3 1 41.5 21.1
 -3 -3 1 51.59 10.1
 3 -3 -1 46.1 8.8
 3 -3 -1 -10.2 28.4
 -3 -3 1 38.6 20.5
 2 3 0 252.07 36.4
 -2 3 0 172.58 42.3
 -2 3 0 269.37 37.8
 2 3 0 231.28 35.1
 -2 -3 0 274.77 34.6
 2 -3 0 275.77 40.7
 2 -3 0 214.28 39.3
 -2 -3 0 339.87 68.39
 1 3 1 3.6 4.3
 -1 3 -1 3.6 2.8
 -1 3 -1 1.6 3.5
 1 -3 1 5.4 8.1
 1 -3 1 0.1 3.5
 -1 -3 -1 4.7 4.1
 -1 -3 -1 6.9 5.2
 0 3 2 6270.77 746.13
 0 3 2 5171.58 747.83
 0 -3 -2 5858.31 746.43
 0 -3 -2 6085.69 748.13
 0 -3 2 5818.92 746.63
 -1 3 3 1286.47 150.48
 -1 3 3 967.9 150.48
 -1 3 3 1197.58 159.78
 1 -3 -3 1061.09 151.68
 1 -3 -3 1100.59 157.78
 -1 -3 3 1157.28 153.18
 -1 -3 3 1452.55 166.08
 -2 3 4 1058.29 119.39
 2 3 -4 656.33 127.19
 2 -3 -4 948.71 123.69
 -2 -3 4 828.12 114.29
 -2 -3 4 864.51 128.99
 -3 3 5 24.4 15
 3 3 -5 6.9 8.1
 3 3 -5 -21.9 35.1
 -3 -3 5 23.6 6.7
 3 -3 -5 6.7 4.8
 3 -3 -5 28.8 28.8
 -3 -3 5 91.29 43.7
 -4 3 6 -2.2 27.6
 -4 3 6 42.4 24.7
 4 3 -6 58.09 15.9
 4 3 -6 132.29 52.19
 -4 -3 6 134.49 31.8
 4 -3 -6 68.09 13.4
 4 -3 -6 70.29 43
 -4 -3 6 65.39 12.9
 -4 -3 6 38.1 37.5
 5 3 -7 17.7 81.69
 -5 3 7 -28.9 26.4
 5 3 -7 4.2 11.1
 -5 3 7 2.9 21.2
 5 -3 -7 23.7 25.9
 5 -3 -7 13.3 7.6
 -5 -3 7 -25.7 35.7
 -5 -3 7 6.5 5.5
 -5 -3 7 48.9 22.2
 5 -3 -7 25.3 41.9
 6 3 -8 709.93 112.29
 -6 3 8 997.4 134.69
 6 3 -8 507.15 150.98
 -6 3 8 784.32 129.69
 -6 -3 8 736.23 138.59
 -6 -3 8 1057.89 132.89
 6 -3 -8 946.51 155.18
 6 -3 -8 849.41 110.89
 7 3 -9 42.1 67.49
 -7 3 9 -5.3 28.8
 -7 3 9 72.49 42.4
 -7 -3 9 56.39 46.5
 7 -3 -9 23.3 14
 -7 -3 9 -18.4 30.2
 7 -3 -9 113.49 75.09
 7 -3 -9 36.7 27.3
 8 -4 -6 85.69 87.39
 -8 -4 6 459.45 89.59
 8 -4 -6 212.38 42.4
 -7 4 5 106.49 43.5
 7 4 -5 109.89 34.3
 -7 4 5 117.89 49.6
 -7 -4 5 87.59 50.29
 7 -4 -5 40.3 45.9
 7 -4 -5 6.7 58.79
 7 -4 -5 72.09 20.5
 6 4 -4 14.8 10.9
 6 4 -4 -8.8 11.6
 -6 4 4 18.5 29.1
 -6 4 4 19.4 28.2
 -6 -4 4 -16.8 33.6
 -6 -4 4 -33.4 23.6
 -6 -4 4 6.8 6.4
 6 -4 -4 1.4 8.1
 6 -4 -4 33 51.59
 6 -4 -4 -5.1 13.6
 6 -4 -4 -29.2 43.6
 -5 4 3 33.7 35.2
 -5 4 3 32.3 28.6
 5 4 -3 30.5 13.5
 5 -4 -3 12 16.4
 5 -4 -3 -3.8 40.5
 -5 -4 3 20 44.5
 -5 -4 3 48.6 29.8
 -5 -4 3 42.9 10.9
 5 -4 -3 39.7 10.7
 4 4 -2 1354.46 162.28
 -4 4 2 1293.27 167.68
 4 4 -2 1207.38 160.68
 -4 4 2 952.2 169.28
 -4 -4 2 1194.08 158.78
 4 -4 -2 1236.48 176.08
 -4 -4 2 1318.87 184.98
 4 -4 -2 1366.86 166.18
 4 -4 -2 1188.08 158.38
 -4 -4 2 1082.59 167.48
 -3 4 1 1381.86 161.08
 3 4 -1 1135.69 152.28
 -3 4 1 1441.26 157.18
 -3 -4 1 1032.7 149.09
 -3 -4 1 981.6 154.58
 -3 -4 1 1005.1 177.28
 3 -4 -1 1200.98 155.48
 3 -4 -1 1035.6 159.68
 2 4 0 1496.05 179.18
 -2 4 0 1413.76 180.38
 -2 4 0 1268.07 183.98
 2 4 0 1498.65 181.18
 2 -4 0 1393.16 182.78
 -2 -4 0 1324.87 178.68
 -2 -4 0 1052.99 193.18
 2 -4 0 1393.96 182.48
 1 4 1 436.46 78.19
 -1 4 -1 564.34 72.59
 1 -4 1 735.73 80.29
 -1 -4 -1 556.44 74.29
 0 4 2 179.48 34.1
 0 4 2 165.38 24.2
 0 -4 -2 129.59 29.1
 0 -4 -2 168.78 26.7
 0 -4 2 159.48 27.7
 -1 4 3 107.39 19
 1 -4 -3 41.6 19.4
 -2 4 4 1833.52 253.37
 -2 4 4 2152.28 249.88
 -2 4 4 1889.31 249.58
 -2 -4 4 1722.43 259.37
 2 -4 -4 1977.6 252.07
 -2 -4 4 1829.12 245.48
 -3 4 5 315.87 49.9
 3 4 -5 169.68 62.39
 3 -4 -5 228.98 66.69
 -3 -4 5 273.27 70.09
 3 -4 -5 249.97 56.09
 -3 -4 5 384.46 46.8
 -3 -4 5 262.97 39.4
 -4 4 6 896.91 140.29
 4 4 -6 1018.7 161.48
 -4 4 6 944.21 139.19
 -4 -4 6 1111.99 160.98
 4 -4 -6 1101.79 150.78
 -4 -4 6 1078.59 137.29
 4 -4 -6 924.21 128.49
 -4 -4 6 989.1 128.89
 -5 4 7 4.8 22.6
 5 4 -7 -38.9 47.2
 -5 4 7 47.8 31.9
 5 -4 -7 20.9 29.8
 -5 -4 7 20.4 21.7
 5 -4 -7 13.9 7.4
 5 -4 -7 6.9 39.2
 -5 -4 7 20.1 8
 -5 -4 7 -17.3 39
 6 4 -8 27.7 58.89
 -6 4 8 -4.6 26.8
 -6 4 8 -0.6 30.5
 -6 -4 8 29.8 43.6
 6 -4 -8 10.8 8.4
 6 -4 -8 24 51.59
 -6 -4 8 -8.5 25.3
 -6 -4 8 6.1 6.2
 6 -4 -8 15.4 32.5
 -7 4 9 48.2 39.1
 7 4 -9 35 70.79
 -7 4 9 -12.2 27.8
 -7 -4 9 20.7 43
 -7 -4 9 -1.6 29.4
 7 -4 -9 -64.59 53.29
 7 -4 -9 -9.8 8
 7 -4 -9 14.8 26.7
 -7 5 5 362.06 68.79
 7 5 -5 287.57 44.7
 -7 5 5 309.57 77.79
 -7 -5 5 349.17 88.79
 7 -5 -5 146.79 65.49
 7 -5 -5 343.17 95.69
 -7 -5 5 275.57 41.6
 7 -5 -5 240.58 43.4
 6 5 -4 10.3 11.2
 -6 5 4 4.6 33.5
 -6 5 4 -29.6 22.5
 6 -5 -4 34.7 50.49
 -6 -5 4 51.69 34.3
 -6 -5 4 14.4 8.1
 6 -5 -4 27 21.2
 6 -5 -4 6.9 8.2
 6 -5 -4 -66.89 42.8
 -6 -5 4 21.8 43.3
 -5 5 3 930.91 128.89
 5 5 -3 942.21 118.89
 -5 5 3 768.82 151.78
 5 -5 -3 856.01 115.29
 5 -5 -3 881.51 127.09
 -5 -5 3 687.33 130.39
 -5 -5 3 952.5 115.79
 5 -5 -3 771.92 140.99
 -5 -5 3 707.03 147.39
 -4 5 2 -16.6 19.2
 4 5 -2 11.5 9.9
 -4 5 2 -8.8 17.3
 4 -5 -2 7.3 4.3
 4 -5 -2 -33.3 27.5
 -4 -5 2 21.3 20.2
 -4 -5 2 8.3 48.6
 -4 -5 2 -0.2 6.4
 -3 5 1 50.09 27.1
 3 5 -1 62.19 17.5
 3 5 -1 118.59 23.4
 3 -5 -1 92.39 29.1
 -3 -5 1 97.49 51.39
 -3 -5 1 61.49 15.1
 3 -5 -1 112.99 28.7
 2 5 0 106.29 22.4
 -2 5 0 88.49 19.4
 -2 5 0 63.49 21.3
 2 5 0 106.59 15.7
 2 -5 0 85.19 19.7
 2 -5 0 57.29 17.3
 -2 -5 0 61.39 14.1
 -1 -5 -1 349.87 45.4
 1 -5 1 266.27 49.4
 -1 -5 -1 350.46 49.3
 1 -5 1 306.77 44.9
 0 5 2 280.07 42.7
 0 -5 -2 375.66 47.3
 -1 5 3 7009.8 787.72
 -1 5 3 5561.14 788.62
 -1 -5 3 5558.24 795.72
 1 -5 -3 6600.54 788.72
 1 -5 -3 5932.11 789.72
 -2 5 4 384.56 59.49
 -2 5 4 338.97 59.29
 2 -5 -4 348.27 62.89
 -2 -5 4 381.76 53.09
 -2 -5 4 476.95 55.09
 -2 -5 4 379.26 84.89
 2 -5 -4 430.16 83.09
 -3 5 5 54.39 23.7
 3 5 -5 32.4 35
 -3 5 5 74.99 20.7
 3 -5 -5 77.09 29.2
 -3 -5 5 85.79 14.3
 3 -5 -5 24.4 27.4
 -3 -5 5 22 37.4
 -3 -5 5 98.59 21.9
 -4 5 6 -17.1 15.4
 4 5 -6 -34.1 39.4
 -4 5 6 5.9 22.9
 -4 -5 6 2.2 38.8
 4 -5 -6 10.6 5.8
 -4 -5 6 0.4 5.9
 4 -5 -6 9.5 31.5
 4 -5 -6 -30.4 26.5
 -4 -5 6 2.4 15.4
 5 5 -7 283.47 94.39
 -5 5 7 532.65 83.39
 -5 5 7 490.95 84.49
 -5 -5 7 497.55 65.09
 5 -5 -7 309.77 91.19
 5 -5 -7 509.15 100.69
 -5 -5 7 593.94 105.69
 -5 -5 7 511.15 80.39
 5 -5 -7 495.15 65.09
 -6 5 8 -14.9 22.1
 6 5 -8 56.19 57.99
 -6 5 8 14.9 27.9
 6 -5 -8 77.09 37.6
 6 -5 -8 -2.7 6.3
 -6 -5 8 22.7 43.2
 -6 -5 8 -2.3 5.5
 6 -5 -8 14.4 49.2
 -7 5 9 491.35 118.09
 -7 5 9 745.83 107.79
 -7 -5 9 486.15 106.99
 -7 -5 9 449.95 157.68
 7 -5 -9 463.55 100.69
 7 -5 -9 464.95 125.19
 7 -5 -9 610.54 78.79
 -7 6 5 100.79 57.59
 -7 6 5 169.88 50.09
 -7 -6 5 185.28 30.4
 -7 -6 5 199.58 71.49
 7 -6 -5 104.59 66.79
 7 -6 -5 211.08 33.8
 6 6 -4 -1.9 15.5
 -6 6 4 -10.8 27.5
 -6 6 4 2.9 25.7
 6 -6 -4 1.9 16.9
 6 -6 -4 -41.9 45.8
 -6 -6 4 -7.3 6.1
 6 -6 -4 2.8 8.1
 6 -6 -4 25.4 52.09
 -6 -6 4 -45 45.3
 5 6 -3 81.69 23.4
 -5 6 3 50.19 35.1
 -5 6 3 133.59 34.9
 5 -6 -3 128.79 49.8
 5 -6 -3 165.98 33
 5 -6 -3 15.5 54.39
 -5 -6 3 37.7 53.19
 -5 -6 3 93.09 19
 -5 -6 3 68.29 34.3
 -4 6 2 487.75 98.99
 -4 6 2 639.34 92.29
 4 -6 -2 765.92 93.99
 4 -6 -2 601.24 100.79
 -4 -6 2 438.16 91.99
 -4 -6 2 874.31 129.79
 -4 -6 2 695.53 84.69
 3 6 -1 790.02 109.39
 -3 6 1 740.03 107.69
 3 6 -1 951.2 105.09
 -3 6 1 620.34 112.59
 -3 -6 1 666.63 133.19
 3 -6 -1 844.22 110.39
 -3 -6 1 745.03 104.49
 3 -6 -1 771.02 112.59
 -2 6 0 1538.55 244.08
 2 6 0 1639.54 243.58
 -2 6 0 1933.81 240.28
 2 6 0 1981.1 237.38
 2 -6 0 1776.12 242.78
 2 -6 0 2202.58 244.68
 1 6 1 302.47 51.29
 -1 -6 -1 258.97 37.8
 1 -6 1 211.48 41.5
 -1 -6 -1 284.67 44.1
 0 6 2 357.36 43.7
 0 6 2 315.47 43
 0 -6 -2 228.68 68.49
 0 -6 -2 291.37 45.9
 -1 6 3 98.89 38.6
 -1 6 3 60.49 19.3
 1 -6 -3 94.39 24.2
 1 -6 -3 37.1 31.5
 1 -6 -3 109.99 24.5
 -2 6 4 1481.05 194.78
 -2 6 4 1294.57 200.08
 -2 6 4 1395.26 194.68
 2 -6 -4 1662.23 199.28
 -2 -6 4 1521.35 192.08
 -2 -6 4 1389.96 218.88
 -3 6 5 536.95 92.99
 -3 6 5 627.14 88.89
 -3 6 5 619.24 88.09
 -3 -6 5 755.22 84.89
 3 -6 -5 411.36 98.39
 -3 -6 5 482.65 107.19
 -3 -6 5 620.74 81.09
 3 -6 -5 613.54 92.79
 -4 6 6 904.01 131.59
 -4 6 6 943.31 130.99
 4 -6 -6 901.01 140.39
 -4 -6 6 901.71 155.98
 -4 -6 6 1005 128.29
 -4 -6 6 851.71 120.29
 -5 6 7 28.1 28.4
 -5 6 7 2.7 21.5
 5 6 -7 -1.2 47.7
 -5 -6 7 -26.8 43.3
 -5 -6 7 3.9 21
 -5 -6 7 12.5 8
 5 -6 -7 4.5 6.3
 5 -6 -7 5.8 29.4
 5 -6 -7 47.4 55.49
 -6 6 8 47.4 29.5
 -6 6 8 41.4 31
 6 -6 -8 66.19 37.3
 -6 -6 8 31.8 28.9
 -6 -6 8 41.5 11.4
 6 -6 -8 80.49 57.29
 6 -6 -8 51.79 13.7
 -6 -6 8 19 42.7
 -7 6 9 -16.3 29.2
 -7 6 9 0.2 31.4
 -7 6 9 -28.1 35.1
 7 -6 -9 1.7 9.4
 7 -6 -9 -33.4 25.3
 -7 -6 9 97.69 57.19
 -7 -6 9 -0.7 32
 7 -6 -9 -8.1 61.09
 -7 7 5 -53.69 57.09
 -7 7 5 -15.3 25.9
 7 -7 -5 -4.5 58.59
 7 -7 -5 -9.5 7.3
 -7 -7 5 17.2 9.1
 7 -7 -5 8.3 43.8
 -7 -7 5 40.8 53.09
 6 7 -4 710.93 114.79
 -6 7 4 694.03 135.09
 -6 7 4 923.51 124.59
 -6 -7 4 842.22 111.49
 6 -7 -4 814.02 146.69
 6 -7 -4 957 112.29
 6 -7 -4 878.61 122.39
 -6 -7 4 847.12 154.28
 -5 7 3 60.59 29.8
 5 7 -3 90.79 25.6
 -5 7 3 79.89 35.7
 5 -7 -3 77.09 24.8
 5 -7 -3 10 55.89
 5 -7 -3 101.49 47.2
 -5 -7 3 153.08 61.89
 -5 -7 3 102.69 20.2
 5 -7 -3 115.49 19.1
 -4 7 2 450.35 67.89
 -4 7 2 238.38 77.59
 -4 -7 2 347.27 92.89
 4 -7 -2 433.96 70.09
 -4 -7 2 505.45 60.69
 4 -7 -2 441.26 79.19
 -3 7 1 4.2 10.9
 3 7 -1 10.4 12.2
 -3 7 1 -8.6 15.9
 3 -7 -1 -4.1 15.5
 -3 -7 1 1.5 5.8
 3 -7 -1 -8.5 10.1
 -3 -7 1 22.8 38.3
 -2 7 0 406.26 50.89
 2 -7 0 348.67 61.79
 2 -7 0 347.77 60.49
 1 7 1 29.6 19.3
 1 -7 1 69.69 38.5
 1 -7 1 26.4 13.7
 -1 -7 -1 24.9 16.3
 0 7 2 2631.74 322.57
 0 7 2 2746.43 322.57
 0 -7 -2 2293.77 323.97
 0 -7 -2 2316.17 332.07
 -1 7 3 268.17 80.39
 -1 7 3 327.07 48
 -1 7 3 343.77 48.8
 1 -7 -3 413.76 50.99
 1 -7 -3 192.98 69.49
 -1 -7 3 273.17 60.29
 1 -7 -3 309.57 56.39
 -2 7 4 1383.16 175.48
 -2 7 4 1378.86 175.78
 -2 7 4 968.4 178.38
 -2 -7 4 1234.28 173.38
 -2 -7 4 1313.77 205.68
 2 -7 -4 1604.74 179.58
 -3 7 5 115.29 29.1
 -3 7 5 90.09 28.4
 -3 7 5 84.89 24.6
 -3 -7 5 137.09 52.19
 -3 -7 5 141.39 21.5
 3 -7 -5 54.69 36.2
 -3 -7 5 155.48 26.6
 3 -7 -5 89.99 29.8
 -4 7 6 330.57 50.69
 -4 7 6 151.88 38.9
 -4 7 6 144.39 41.7
 -4 -7 6 209.28 41.6
 -4 -7 6 161.98 27.4
 4 -7 -6 74.49 45.4
 -4 -7 6 208.98 73.09
 4 -7 -6 144.59 47.3
 -5 7 7 18 33.8
 -5 7 7 -2.7 21.7
 -5 7 7 46.1 31.6
 -5 -7 7 -2.9 5.7
 5 -7 -7 -11.4 31.7
 -5 -7 7 -8.3 17.2
 5 -7 -7 52.39 39
 5 -7 -7 3.1 7.1
 -5 -7 7 26.9 46.7
 -6 7 8 584.94 112.99
 -6 7 8 643.84 131.19
 -6 7 8 778.82 112.39
 -6 -7 8 675.23 94.19
 -6 -7 8 784.42 139.69
 6 -7 -8 650.83 134.79
 6 -7 -8 724.13 94.79
 -6 -7 8 738.13 113.19
 -7 7 9 -11.7 27.3
 -7 7 9 73.09 41.1
 -7 7 9 8.5 33.6
 7 -7 -9 -4.9 36.1
 -7 -7 9 4.1 31.2
 7 -7 -9 10.8 11.1
 -7 -7 9 0.3 8.9
 7 -7 -9 12.8 55.09
 -7 -7 9 70.99 54.69
 -7 8 5 21.5 40.5
 -7 8 5 63.99 35
 7 -8 -5 18.4 11.3
 -7 -8 5 35.5 13.3
 7 -8 -5 -5.1 58.99
 7 -8 -5 -11.2 39.4
 6 8 -4 13.9 17.5
 -6 8 4 -10.8 23.9
 -6 8 4 -13.8 22.7
 6 -8 -4 19.6 10.1
 6 -8 -4 4.3 45.3
 6 -8 -4 1.5 51.49
 -6 -8 4 40.6 56.69
 -6 -8 4 10.8 8.6
 6 -8 -4 25 17.6
 -5 8 3 180.88 53.09
 5 8 -3 176.78 44.3
 -5 8 3 207.38 43.3
 5 -8 -3 160.48 54.39
 5 -8 -3 140.69 63.99
 -5 -8 3 149.39 28.5
 5 -8 -3 161.08 27
 -5 -8 3 147.39 67.89
 5 -8 -3 167.98 39.6
 -4 8 2 340.97 52.29
 -4 8 2 256.67 67.29
 4 -8 -2 273.27 52.29
 4 -8 -2 151.88 75.39
 4 -8 -2 264.97 63.49
 -4 -8 2 242.78 83.09
 -4 -8 2 324.77 43.9
 -3 8 1 730.43 132.09
 -3 8 1 1007.7 126.89
 3 8 -1 767.52 131.19
 3 -8 -1 1043.6 132.29
 3 -8 -1 965.2 129.39
 -3 -8 1 1064.99 125.29
 -3 -8 1 1077.59 159.18
 2 8 0 229.48 70.19
 2 -8 0 381.36 58.59
 2 -8 0 452.85 60.99
 -2 -8 0 373.16 59.59
 -1 -8 -1 882.61 118.19
 1 -8 1 729.73 149.59
 -1 -8 -1 772.22 107.29
 0 8 2 477.25 97.89
 0 -8 -2 580.64 76.59
 -1 8 3 14.1 14
 -1 -8 3 -80.09 50.49
 1 -8 -3 -43.3 35.4
 -2 8 4 531.25 71.09
 -2 8 4 411.26 71.69
 -2 -8 4 527.25 110.19
 -2 -8 4 441.06 70.49
 2 -8 -4 478.05 72.49
 -3 8 5 1568.04 188.38
 -3 8 5 1338.47 179.78
 -3 8 5 1552.44 183.68
 -3 -8 5 1393.56 211.18
 3 -8 -5 1210.78 184.48
 3 -8 -5 1078.69 196.38
 -3 -8 5 1274.07 174.78
 -4 8 6 133.39 39.2
 -4 8 6 266.17 46.8
 -4 8 6 156.28 46.4
 -4 -8 6 177.08 72.19
 -4 -8 6 191.88 41.2
 4 -8 -6 153.88 50.69
 -4 -8 6 166.88 27.6
 4 -8 -6 48 48.3
 -5 8 7 360.36 69.29
 -5 8 7 380.56 83.29
 -5 8 7 316.97 74.19
 5 -8 -7 363.06 51.79
 5 -8 -7 347.27 92.59
 -5 -8 7 471.45 110.09
 -5 -8 7 431.86 69.89
 5 -8 -7 326.37 86.69
 -6 8 8 50.89 29.7
 -6 8 8 -1.4 27.3
 6 -8 -8 19.4 49
 -6 -8 8 6.2 7.4
 -6 -8 8 -20.1 50.99
 -6 -8 8 -3 26.7
 6 -8 -8 -2.2 34.8
 6 -8 -8 7.8 7.3
 -7 8 9 31.6 38.9
 -7 8 9 0.3 33.3
 -7 8 9 5.4 31.5
 7 -8 -9 37 63.89
 -7 -8 9 24.3 30.8
 7 -8 -9 23.9 34.2
 -7 -8 9 100.09 59.19
 7 -8 -9 8.4 9.6
 -7 -8 9 3.4 7.7
 -7 9 5 68.19 56.49
 -7 9 5 171.88 43.9
 7 -9 -5 30.3 48.4
 7 -9 -5 147.59 26.7
 -7 -9 5 130.89 25.4
 -7 -9 5 226.88 88.69
 7 -9 -5 98.19 67.39
 -6 9 4 216.28 51.49
 -6 9 4 190.58 58.89
 6 -9 -4 253.07 36.1
 -6 -9 4 255.57 37
 6 -9 -4 299.87 77.49
 6 -9 -4 94.09 64.69
 6 -9 -4 217.78 52.69
 -6 -9 4 246.68 86.39
 -5 9 3 651.73 94.39
 -5 9 3 431.16 107.59
 -5 -9 3 703.43 86.79
 5 -9 -3 632.44 94.79
 -5 -9 3 647.44 139.89
 5 -9 -3 575.54 108.29
 -4 9 2 35.4 34.2
 -4 9 2 134.89 31.9
 4 -9 -2 16.9 62.19
 4 -9 -2 288.37 44.8
 4 -9 -2 85.19 38.6
 -4 -9 2 65.69 67.89
 -4 -9 2 156.78 27.7
 3 9 -1 -20.9 18.1
 -3 9 1 -17.4 20.3
 -3 -9 1 16.6 11.5
 3 -9 -1 11.2 20.6
 3 -9 -1 18.5 50.99
 -3 -9 1 113.29 54.39
 3 -9 -1 14.7 15.3
 2 9 0 79.49 31.8
 -2 -9 0 129.69 29
 2 -9 0 142.59 28.5
 2 -9 0 116.79 29.4
 -1 -9 -1 565.74 70.69
 -1 -9 -1 410.96 81.49
 1 -9 1 503.25 73.89
 1 -9 1 539.15 133.69
 0 9 2 1629.34 181.58
 0 -9 2 1131.99 181.98
 0 -9 -2 1389.26 183.08
 0 -9 -2 1596.24 203.68
 0 -9 2 1197.58 206.78
 -1 9 3 2055.69 233.88
 -1 9 3 1911.81 229.78
 1 -9 -3 1669.43 235.88
 1 -9 -3 1336.37 251.57
 1 -9 -3 1715.33 234.48
 -2 9 4 214.58 36
 -2 9 4 132.89 36.1
 2 -9 -4 53.89 43.4
 -2 -9 4 180.48 57.39
 2 -9 -4 266.87 39
 -2 -9 4 143.79 35.5
 -3 9 5 -4.1 16.7
 -3 9 5 18 23.1
 -3 9 5 37.6 20
 -3 -9 5 -64.69 50.19
 -3 -9 5 35 11.4
 3 -9 -5 6.8 25.1
 3 -9 -5 -19 34.4
 -3 -9 5 39 12.7
 -3 -9 5 12.6 11.5
 -4 9 6 -9 25.8
 4 -9 -6 -4 32.2
 -4 -9 6 63.79 65.09
 -4 -9 6 13.2 16.2
 4 -9 -6 64.89 44.7
 -5 9 7 270.77 55.79
 -5 9 7 142.79 49.5
 -5 9 7 170.88 52.69
 -5 -9 7 227.98 35.9
 5 -9 -7 310.97 76.09
 5 -9 -7 117.59 58.39
 -5 -9 7 406.06 58.59
 -5 -9 7 278.67 88.89
 -6 9 8 28.4 38.5
 -6 9 8 36 30.6
 -6 9 8 54.79 33.6
 -6 -9 8 143.09 71.49
 6 -9 -8 28.2 41.8
 -6 -9 8 39.1 31.6
 -6 -9 8 61.79 15.3
 6 -9 -8 88.49 58.89
 6 -9 -8 49.4 13.8
 -7 9 9 269.27 69.19
 -7 9 9 190.88 65.79
 -7 -9 9 310.87 89.69
 7 -9 -9 202.88 62.39
 7 -9 -9 164.28 43.3
 -7 -9 9 219.78 58.39
 -7 -9 9 206.78 35.8
 -7 10 5 -7.6 26.9
 7 -10 -5 0.9 7.9
 7 -10 -5 43.7 59.09
 -7 -10 5 -3.3 7.7
 -7 -10 5 -83.39 59.39
 7 -10 -5 1.6 45.2
 -6 10 4 -39.1 26.3
 -6 10 4 -1.3 20.2
 6 -10 -4 -10.6 42.1
 -6 -10 4 4 9.4
 6 -10 -4 16.5 20.6
 -6 -10 4 35 68.69
 6 -10 -4 3.1 38.3
 6 -10 -4 7.2 8.2
 5 10 -3 23.4 23.8
 -5 10 3 -2 20.9
 -5 10 3 -32.8 24.8
 5 -10 -3 -32.2 52.79
 5 -10 -3 1.8 14.7
 -5 -10 3 -34.7 55.89
 5 -10 -3 9 33.5
 -5 -10 3 15.8 10.8
 -4 10 2 1229.48 207.68
 4 -10 -2 1493.15 201.28
 4 -10 -2 1629.64 209.48
 -4 -10 2 1570.04 195.98
 -4 -10 2 1458.25 237.78
 3 10 -1 -29.4 20
 -3 10 1 36.8 25.7
 -3 10 1 21.4 13.7
 -3 10 1 10.2 4.4
 3 -10 -1 -5.9 13.6
 3 -10 -1 19 22
 -3 -10 1 75.69 58.39
 -3 -10 1 9.2 10.9
 3 -10 -1 -2.6 53.49
 -2 -10 0 695.73 97.89
 2 -10 0 746.23 100.19
 -2 -10 0 717.63 102.29
 2 -10 0 696.13 99.89
 1 10 1 -19.1 23.5
 1 -10 1 1.5 11.5
 -1 -10 -1 17.9 7.5
 -1 -10 -1 21.8 20.1
 1 -10 1 -5.6 46.3
 0 10 2 538.25 74.19
 0 -10 -2 599.74 77.49
 0 -10 -2 774.72 107.09
 0 -10 2 516.15 114.29
 0 -10 2 439.46 75.09
 -1 10 3 38.6 14.5
 -1 10 3 49.8 39.6
 -1 10 3 33 8
 -1 -10 3 27.2 27.2
 1 -10 -3 32.5 20.6
 1 -10 -3 35.6 20.1
 1 -10 -3 42.1 37
 -2 10 4 1490.05 178.78
 -2 10 4 1308.27 174.38
 -2 -10 4 1319.77 203.78
 -2 -10 4 1201.48 178.98
 2 -10 -4 1012.3 193.98
 2 -10 -4 1541.85 180.18
 -3 10 5 -0.7 17
 -3 10 5 -4.9 16.2
 3 -10 -5 10.9 39.4
 -3 -10 5 39.9 12.8
 3 -10 -5 88.99 32.4
 -3 -10 5 44.4 62.59
 -3 -10 5 -3.1 11.8
 -3 -10 5 15.8 11.8
 -4 10 6 1165.28 164.58
 -4 10 6 1068.69 153.78
 -4 -10 6 1239.58 151.28
 -4 -10 6 956.7 192.78
 4 -10 -6 1061.69 164.68
 -4 -10 6 1042.8 146.99
 -5 10 7 53.29 32.6
 -5 10 7 113.69 40.7
 -5 10 7 100.09 35.4
 -5 -10 7 97.69 21
 -5 -10 7 126.29 35.3
 5 -10 -7 93.69 47.8
 -5 -10 7 146.49 73.29
 -6 10 8 155.38 54.79
 -6 10 8 89.09 36.5
 -6 10 8 48.2 35.6
 -6 -10 8 13.6 62.29
 -6 -10 8 67.89 34.7
 -6 -10 8 84.29 19.2
 6 -10 -8 122.89 20.6
 6 -10 -8 17 43.8
 6 -10 -8 59.69 45.1
 -7 10 9 37.2 52.19
 -7 10 9 -22.9 28.4
 -7 10 9 -7 29.3
 7 -10 -9 -42 49.2
 7 -10 -9 4.6 8.7
 -7 -10 9 -53.49 31
 -7 -10 9 -5.7 7.4
 7 -10 -9 23.3 35.8
 -7 11 5 84.59 23.8
 -7 11 5 113.49 45.3
 -7 11 5 111.19 37.7
 -7 -11 5 126.09 24.9
 7 -11 -5 125.09 69.99
 7 -11 -5 25.8 47.7
 7 -11 -5 144.29 25
 -7 -11 5 95.09 69.89
 -6 11 4 598.34 86.59
 -6 11 4 375.56 98.39
 -6 11 4 454.55 95.29
 -6 -11 4 568.94 142.39
 -6 -11 4 507.55 73.79
 6 -11 -4 541.05 72.59
 6 -11 -4 506.75 109.89
 5 11 -3 102.29 38
 -5 11 3 170.78 51.39
 -5 11 3 171.78 43.2
 5 -11 -3 60.09 61.49
 5 -11 -3 221.48 44.1
 5 -11 -3 160.38 51.39
 -5 -11 3 265.37 33.9
 -5 -11 3 218.58 81.89
 -4 11 2 333.47 86.69
 4 11 -2 250.97 67.29
 4 -11 -2 416.46 68.09
 -4 -11 2 463.05 60.39
 4 -11 -2 480.75 79.29
 4 -11 -2 389.46 121.39
 -4 -11 2 640.24 131.79
 3 11 -1 9.4 27.9
 -3 11 1 18.4 27.3
 -3 -11 1 38.6 17.1
 -3 -11 1 -20.8 62.09
 3 -11 -1 10.5 16.5
 3 -11 -1 11.7 54.49
 3 -11 -1 77.49 29
 2 11 0 104.09 41.9
 2 -11 0 277.97 41.9
 2 -11 0 74.79 60.89
 -2 -11 0 206.38 31.7
 -2 -11 0 234.98 46.7
 2 -11 0 130.99 37.2
 1 11 1 14.6 23.4
 -1 -11 -1 40.2 12.7
 -1 -11 -1 44.6 21.8
 1 -11 1 53.69 45.5
 1 -11 1 45.2 15.5
 0 11 2 1763.92 271.07
 0 -11 2 2322.57 272.57
 0 -11 -2 2124.19 289.57
 0 -11 -2 2244.18 274.17
 -1 11 3 917.91 113.99
 -1 11 3 850.51 119.49
 1 -11 -3 929.71 123.19
 1 -11 -3 816.62 141.89
 -1 -11 3 725.73 133.39
 1 -11 -3 1069.79 122.99
 -1 -11 3 803.22 114.49
 -2 11 4 283.27 39
 -2 11 4 212.98 46.2
 -2 -11 4 527.75 106.59
 2 -11 -4 167.18 47.5
 2 -11 -4 144.89 65.09
 -3 11 5 522.15 66.99
 -3 -11 5 313.27 97.19
 3 -11 -5 128.19 68.89
 -3 -11 5 297.57 49.8
 3 -11 -5 308.97 65.49
 -3 -11 5 277.37 44.4
 -4 11 6 7.8 21.1
 -4 11 6 71.59 30.4
 -4 -11 6 19.3 17.2
 -4 -11 6 -23.4 59.29
 4 -11 -6 37.5 41.3
 4 -11 -6 29.1 31.2
 -4 -11 6 8.1 11.7
 -5 11 7 184.48 47.4
 -5 11 7 107.79 45
 -5 11 7 78.59 40.3
 -5 -11 7 167.28 40.2
 5 -11 -7 164.78 57.69
 -5 -11 7 188.88 81.69
 5 -11 -7 178.98 62.39
 -5 -11 7 178.28 29.5
 -6 11 8 259.57 58.99
 -6 11 8 188.38 58.49
 -6 11 8 135.49 55.99
 -6 -11 8 226.98 36.2
 6 -11 -8 138.59 62.99
 6 -11 -8 226.98 34.7
 -6 -11 8 226.38 54.09
 -6 -11 8 338.07 102.69
 6 -11 -8 169.28 65.79
 -7 -11 9 141.99 26.6
 -7 -11 9 115.29 56.99
 7 -11 -9 217.68 78.79
 7 -11 -9 96.79 24.7
 -7 12 5 234.98 53.99
 7 -12 -5 147.69 29.5
 7 -12 -5 175.48 71.69
 -7 -12 5 144.39 30.9
 6 12 -4 -11.4 37.2
 -6 12 4 13.3 8.7
 -6 12 4 8.1 26.6
 6 -12 -4 6.6 39.9
 6 -12 -4 -17.6 43.5
 -6 -12 4 -121.59 52.69
 6 -12 -4 7.2 8
 -6 -12 4 33.4 15.3
 -5 12 3 162.88 41.4
 -5 12 3 142.69 54.59
 5 12 -3 348.57 63.89
 -5 12 3 219.08 32
 5 -12 -3 208.48 93.79
 -5 -12 3 162.28 34.6
 5 -12 -3 199.08 46.9
 5 -12 -3 64.79 57.09
 -5 -12 3 330.27 100.29
 -4 12 2 56.99 23.5
 4 12 -2 8.6 27.9
 -4 12 2 56.99 35.9
 -4 -12 2 272.67 87.29
 -4 -12 2 27.5 13.3
 4 -12 -2 2.2 29.9
 4 -12 -2 24 16.9
 4 -12 -2 -41.7 49.5
 -3 -12 1 1216.38 156.48
 3 -12 -1 1042 154.78
 3 -12 -1 1079.09 158.98
 2 12 0 35.7 35.5
 2 -12 0 62.49 56.49
 2 -12 0 76.69 22.7
 2 -12 0 77.59 27.4
 -2 -12 0 112.89 30.9
 -2 -12 0 81.59 19.9
 1 12 1 326.67 95.89
 -1 -12 -1 543.65 67.79
 -1 -12 -1 489.05 83.29
 1 -12 1 288.07 87.99
 1 -12 1 504.05 68.49
 0 -12 2 -6 28.3
 0 -12 -2 16.1 30.5
 -1 12 3 190.48 34.8
 -1 12 3 66.49 54.69
 -1 -12 3 91.09 45.8
 1 -12 -3 121.89 52.49
 -2 12 4 150.88 22.6
 -2 12 4 100.69 31.1
 2 -12 -4 102.19 34.3
 2 -12 -4 99.99 57.09
 -2 -12 4 139.79 74.49
 -3 12 5 585.74 107.19
 -3 12 5 641.24 111.19
 3 -12 -5 809.62 116.99
 -3 -12 5 811.62 98.49
 -3 -12 5 760.62 105.79
 -3 -12 5 668.33 154.88
 -4 12 6 -18.7 20.8
 -4 12 6 -21.2 20.7
 -4 -12 6 -13.4 11.1
 4 -12 -6 1.9 33.3
 -4 -12 6 -5.8 60.29
 -5 12 7 187.28 57.09
 -5 12 7 208.78 54.89
 5 -12 -7 329.27 99.49
 5 -12 -7 221.18 65.99
 -5 -12 7 267.67 40.5
 -5 -12 7 236.38 96.49
 -5 -12 7 235.38 48.4
 -6 12 8 -23.5 26.9
 -6 12 8 65.59 39.6
 -6 -12 8 -4.9 8.6
 6 -12 -8 -9.4 6.3
 -6 -12 8 -39 66.39
 6 -12 -8 27 48.3
 6 -12 -8 -35.1 39
 -6 -12 8 -5.1 27.6
 -6 13 4 625.64 75.99
 -6 13 4 398.66 98.89
 -6 -13 4 602.24 157.78
 6 -13 -4 469.05 74.49
 -6 -13 4 515.05 76.99
 6 -13 -4 494.75 109.69
 -5 13 3 247.78 31.9
 5 13 -3 82.69 46.7
 -5 13 3 206.58 44.2
 -5 -13 3 169.78 36.2
 5 -13 -3 168.08 71.79
 5 -13 -3 172.88 53.69
 -5 -13 3 164.48 89.89
 5 -13 -3 237.78 50.29
 4 13 -2 23.5 30.4
 4 -13 -2 104.79 41.2
 4 -13 -2 19.8 50.19
 4 -13 -2 27.4 19.6
 -4 -13 2 181.48 84.39
 -4 -13 2 60.69 18.3
 3 13 -1 3.4 30.6
 -3 -13 1 29.1 14.2
 3 -13 -1 56.99 22
 3 -13 -1 45.1 56.89
 3 -13 -1 66.89 30.1
 -3 -13 1 38.2 21.5
 2 13 0 4.6 33.3
 -2 -13 0 29.9 11.1
 2 -13 0 42.8 19.8
 2 -13 0 24.7 23.1
 -2 -13 0 54.69 24.6
 2 -13 0 30.2 47.2
 1 13 1 456.05 103.29
 1 -13 1 428.96 64.99
 -1 -13 -1 435.86 85.09
 -1 -13 -1 418.86 63.39
 0 -13 2 1378.46 185.58
 0 -13 2 1415.66 181.68
 -1 13 3 179.68 46
 1 -13 -3 129.29 64.49
 -1 -13 3 132.99 59.79
 -1 -13 3 242.48 33.9
 1 -13 -3 353.46 54.99
 -2 13 4 341.57 67.39
 2 -13 -4 422.26 110.09
 2 -13 -4 495.05 71.09
 -2 -13 4 379.36 105.89
 -2 -13 4 317.07 75.59
 -3 13 5 51.29 27.8
 -3 13 5 71.19 18.4
 -3 -13 5 70.29 23.4
 -3 -13 5 346.67 104.29
 -4 13 6 -31.7 24
 -4 13 6 -8.9 21
 -4 -13 6 7.5 13
 4 -13 -6 7.6 48.6
 -4 -13 6 6 13.8
 -4 -13 6 -32.3 65.39
 4 -13 -6 29.6 35.2
 -5 13 7 53.19 23.9
 -5 13 7 -5.3 28
 5 -13 -7 5.6 36.9
 -5 -13 7 23.4 12.9
 -5 -13 7 -1.6 70.29
 5 -13 -7 37.4 52.39
 -5 -13 7 16.7 19.6
 -6 13 8 266.07 74.89
 -6 13 8 383.56 94.79
 6 -13 -8 243.88 81.59
 -6 -13 8 370.06 56.09
 6 -13 -8 498.65 105.19
 -6 -13 8 317.97 114.09
 6 -13 -8 441.76 54.89
 -6 14 4 2.6 8.7
 -6 14 4 27.6 31.3
 -6 -14 4 18.9 13.8
 6 -14 -4 -17.7 37.8
 -6 -14 4 140.89 92.89
 6 -14 -4 7.2 53.09
 5 14 -3 16.5 35.8
 -5 -14 3 -49.5 63.79
 5 -14 -3 2.6 19.6
 -5 -14 3 8 12.1
 5 -14 -3 -16.8 46.1
 5 -14 -3 54.79 38.2
 -4 -14 2 559.34 153.78
 4 -14 -2 715.93 105.49
 -4 -14 2 756.22 105.89
 4 -14 -2 683.53 117.09
 -4 -14 2 727.03 102.09
 3 14 -1 116.69 52.69
 3 -14 -1 141.09 63.19
 -3 -14 1 187.88 45.7
 3 -14 -1 142.69 38.2
 -3 -14 1 154.38 33.4
 3 -14 -1 294.37 54.99
 -2 -14 0 1714.83 214.28
 2 -14 0 1448.16 215.88
 2 -14 0 1611.84 215.08
 -2 -14 0 1645.94 224.58
 1 14 1 58.29 56.09
 -1 -14 -1 151.18 28.9
 -1 -14 -1 76.99 36.1
 1 -14 1 100.29 55.19
 1 -14 1 184.68 33.8
 0 14 2 -12.5 51.29
 0 -14 -2 61.69 20.3
 0 -14 2 42.2 22.5
 0 -14 -2 38.6 39.1
 0 -14 2 48 49.6
 0 -14 2 59.69 13.4
 -1 14 3 62.09 23.1
 1 -14 -3 4.8 43.1
 -1 -14 3 2.5 37.3
 -2 14 4 843.72 134.89
 2 -14 -4 1016.8 136.49
 2 -14 -4 875.11 168.58
 -2 -14 4 993.8 144.99
 -3 14 5 98.39 34.9
 3 -14 -5 137.69 60.59
 3 -14 -5 43.4 55.89
 -3 -14 5 211.08 48.7
 -3 -14 5 71.99 80.29
 -4 14 6 368.36 84.29
 -4 14 6 351.86 76.29
 -4 -14 6 702.73 150.98
 4 -14 -6 558.94 94.39
 4 -14 -6 500.85 121.19
 -4 -14 6 498.25 69.99
 -5 14 7 47.1 35.4
 -5 14 7 21.4 28.6
 -5 -14 7 155.38 94.29
 -5 -14 7 33.2 15
 5 -14 -7 12.4 50.89
 5 -14 -7 64.49 47.7
 -6 14 8 9.6 26.8
 -6 14 8 -19.9 31.9
 6 -14 -8 -21.6 40.8
 -6 -14 8 -38.6 69.49
 6 -14 -8 24.4 46.3
 -6 -15 4 -7.9 16.4
 -6 -15 4 103.69 83.49
 6 -15 -4 -26.3 55.19
 6 -15 -4 39.2 41.8
 -6 -15 4 -4.9 12.7
 -5 -15 3 391.56 126.09
 -5 -15 3 555.54 84.79
 5 -15 -3 307.67 109.39
 5 -15 -3 583.24 103.89
 5 -15 -3 595.04 87.89
 -5 -15 3 511.85 77.19
 4 15 -2 82.29 46
 -4 -15 2 10.4 10.5
 4 -15 -2 -7.2 49.1
 -4 -15 2 1.8 15.8
 4 -15 -2 21.6 49.1
 4 -15 -2 6.9 15.3
 -4 -15 2 11.5 67.29
 3 15 -1 -42.7 40.8
 3 -15 -1 2.9 49.2
 -3 -15 1 -6.5 17.7
 3 -15 -1 14.9 16
 -3 -15 1 2 9.3
 2 15 0 15.5 52.79
 -2 -15 0 141.99 40.6
 -2 -15 0 154.98 30.2
 2 -15 0 66.99 56.29
 2 -15 0 181.58 43.7
 2 -15 0 167.58 35.6
 1 15 1 141.99 64.59
 -1 -15 -1 214.98 35.5
 1 -15 1 154.98 37.7
 1 -15 1 95.09 62.89
 0 -15 2 99.89 25.6
 0 -15 -2 25.3 41.8
 0 -15 -2 74.39 23.7
 0 -15 2 57.99 55.39
 0 -15 2 92.19 17.7
 1 -15 -3 1682.63 247.68
 -1 -15 3 1686.43 207.58
 -1 -15 3 1288.57 233.18
 -2 15 4 41 22.7
 -2 -15 4 52.29 32.5
 2 -15 -4 47.2 48.8
 2 -15 -4 50.09 29.4
 -3 15 5 26.4 26.3
 -3 -15 5 9.4 22.7
 3 -15 -5 123.39 62.69
 3 -15 -5 25.7 32.8
 -3 -15 5 35.8 71.99
 -4 15 6 3.6 22.9
 4 -15 -6 -2.6 32.1
 4 -15 -6 -19.1 46.9
 -4 -15 6 44.3 77.79
 -4 -15 6 5.7 15
 -5 15 7 162.58 51.99
 -5 15 7 179.38 45.2
 -5 -15 7 252.47 41.2
 5 -15 -7 193.58 71.39
 -5 -15 7 166.68 97.39
 5 -15 -7 194.28 63.89
 -6 15 8 -13.8 28.6
 -6 15 8 22 38.8
 -6 -15 8 6 12.4
 6 -15 -8 10.4 48.7
 6 -15 -8 -3.6 45.7
 6 -16 -4 -13.4 52.29
 6 -16 -4 91.59 47.4
 -6 -16 4 -1 16
 -6 -16 4 2.9 14.4
 5 -16 -3 45.9 55.09
 -5 -16 3 47 20.3
 -5 -16 3 30.5 18.1
 5 -16 -3 33.7 42.5
 4 16 -2 81.19 56.79
 4 -16 -2 274.77 49
 4 -16 -2 89.69 65.19
 -4 -16 2 233.38 41.2
 4 -16 -2 155.88 51.49
 -4 -16 2 143.49 86.69
 -4 -16 2 148.39 37.1
 3 -16 -1 769.72 109.99
 -3 -16 1 739.63 106.39
 -3 -16 1 763.92 115.49
 3 -16 -1 650.03 113.29
 2 16 0 68.39 59.99
 2 -16 0 179.48 75.79
 2 -16 0 185.08 39.5
 -2 -16 0 216.68 61.89
 -2 -16 0 226.98 38
 2 -16 0 191.98 49.9
 1 16 1 156.28 74.19
 -1 -16 -1 292.97 75.89
 1 -16 1 172.08 80.99
 1 -16 1 321.67 47.6
 -1 -16 -1 303.27 48.5
 0 16 2 60.89 62.19
 0 -16 2 48.1 58.09
 0 -16 -2 215.18 49.9
 0 -16 -2 10.4 36.6
 0 -16 2 68.59 17.6
 0 -16 2 92.49 20.1
 1 -16 -3 224.38 54.79
 1 -16 -3 120.19 61.19
 -1 -16 3 179.58 31.4
 -1 -16 3 230.88 67.39
 -2 16 4 106.79 35.7
 2 -16 -4 94.79 58.59
 2 -16 -4 204.28 49.9
 -2 -16 4 111.59 42.1
 3 -16 -5 272.87 95.19
 -3 -16 5 496.05 81.09
 3 -16 -5 511.95 85.49
 -3 -16 5 340.77 114.69
 -4 16 6 212.08 58.39
 -4 -16 6 248.08 51.29
 4 -16 -6 335.17 77.79
 -4 -16 6 532.05 127.29
 4 -16 -6 264.77 84.39
 -5 16 7 64.89 40.8
 5 -16 -7 133.29 55.59
 5 -16 -7 86.59 60.29
 -5 -16 7 111.79 104.09
 -5 -16 7 109.49 28.5
 -5 -17 3 4.1 86.59
 -5 -17 3 21.1 16.4
 5 -17 -3 34.4 58.69
 5 -17 -3 50.69 44
 -5 -17 3 -2 17.1
 4 17 -2 148.29 63.29
 4 -17 -2 110.59 73.19
 -4 -17 2 193.38 99.99
 4 -17 -2 278.27 54.59
 4 -17 -2 265.17 68.29
 -4 -17 2 243.98 51.09
 -4 -17 2 304.97 48.8
 3 17 -1 7 47.6
 3 -17 -1 -4.4 13.4
 3 -17 -1 -4.2 51.59
 -3 -17 1 7.3 19.6
 3 -17 -1 -5.2 27.2
 -3 -17 1 -9.6 9.4
 2 -17 0 310.27 66.59
 -2 -17 0 338.17 79.49
 -2 -17 0 347.87 58.39
 2 -17 0 381.06 58.79
 1 17 1 66.99 77.49
 1 -17 1 77.19 21.8
 -1 -17 -1 60.99 21.9
 1 -17 1 39.3 57.19
 0 -17 2 1942.61 252.97
 1 -17 -3 20.8 26.2
 1 -17 -3 48.6 50.59
 -1 -17 3 26.1 10.1
 -1 -17 3 -4.5 38.1
 -2 17 4 393.26 79.19
 2 -17 -4 524.05 83.49
 2 -17 -4 399.26 127.09
 -2 -17 4 482.35 95.79
 -3 17 5 18.9 28.4
 3 -17 -5 -30 43.8
 -3 -17 5 55.19 28.2
 -3 -17 5 131.89 84.99
 3 -17 -5 72.29 38.1
 -4 17 6 33.7 32.2
 -4 -17 6 37.7 21.6
 4 -17 -6 17.6 37.4
 -4 -17 6 82.19 84.19
 4 -17 -6 -1 47
 -5 17 7 22.9 42.4
 5 -17 -7 14.7 50.69
 5 -17 -7 36.4 46.5
 -5 -17 7 -1.8 18.7
 -5 -17 7 -4.1 84.99
 -5 -18 3 25.8 21.6
 -5 -18 3 16.9 78.89
 5 -18 -3 -5.1 58.69
 -5 -18 3 4.8 13.8
 5 -18 -3 74.99 41.5
 4 -18 -2 61.99 62.69
 -4 -18 2 123.19 33.5
 -4 -18 2 103.59 91.19
 -4 -18 2 166.08 37.6
 4 -18 -2 108.89 48.9
 3 18 -1 163.18 75.29
 3 -18 -1 248.28 62.69
 -3 -18 1 304.97 65.39
 3 -18 -1 152.48 76.09
 -3 -18 1 201.68 45.2
 3 -18 -1 321.37 52.59
 2 18 0 -25.5 52.09
 -2 -18 0 101.49 41.1
 -2 -18 0 59.69 21.5
 2 -18 0 113.19 37.5
 2 -18 0 143.89 30.4
 2 -18 0 29.4 60.89
 1 -18 1 402.26 62.49
 1 -18 1 310.57 103.69
 -1 -18 -1 359.46 98.49
 -1 -18 -1 429.96 67.79
 0 -18 -2 51.89 44.9
 0 -18 2 17.3 47.3
 0 -18 -2 60.59 27.5
 -1 -18 3 19.7 10.1
 1 -18 -3 13.9 26.5
 1 -18 -3 41.3 51.89
 -1 -18 3 55.09 51.99
 2 -18 -4 208.98 52.59
 -2 -18 4 151.78 54.79
 2 -18 -4 151.28 73.19
 -2 -18 4 259.27 39.4
 -3 18 5 200.38 59.29
 3 -18 -5 365.86 101.19
 3 -18 -5 270.97 68.69
 -3 -18 5 371.66 72.09
 -3 -18 5 276.97 109.09
 -4 18 6 52.29 37.6
 4 -18 -6 75.89 63.89
 -4 -18 6 67.99 27
 -4 -18 6 170.28 164.48
 -4 -18 6 201.58 44.3
 4 -18 -6 100.89 48.3
 -5 18 7 38.7 39.8
 -5 -18 7 128.89 28.6
 5 -18 -7 172.08 75.69
 5 -19 -3 485.85 105.69
 -4 -19 2 49.1 20.7
 -4 -19 2 -42.6 75.39
 4 -19 -2 65.59 40.2
 4 -19 -2 -38.1 61.69
 -4 -19 2 52.99 26.8
 -3 -19 1 24.6 16.4
 3 -19 -1 29.3 60.69
 -3 -19 1 10 25.1
 3 -19 -1 17.9 35.2
 -2 -19 0 53.79 20.2
 -2 -19 0 33 32.1
 2 -19 0 32.1 29
 2 -19 0 31.2 49.99
 -1 -19 -1 735.83 127.39
 -1 -19 -1 590.24 93.89
 1 -19 1 471.25 149.99
 0 -19 -2 73.99 27.7
 0 -19 2 13.4 52.29
 0 -19 -2 131.09 60.89
 1 -19 -3 526.85 145.89
 -1 -19 3 760.22 100.49
 -1 -19 3 644.54 143.39
 1 -19 -3 788.12 113.69
 2 -19 -4 -42.5 38.1
 -2 -19 4 -9.2 7.6
 2 -19 -4 0.5 27.6
 -2 -19 4 2 29.8
 -3 -19 5 13.5 12.5
 3 -19 -5 27 56.69
 3 -19 -5 38.9 37.6
 -3 -19 5 -10.2 73.69
 -3 -19 5 -3.4 25.6
 -4 19 6 -42 32
 4 -19 -6 17.1 55.19
 -4 -19 6 -41.8 81.89
 -4 -19 6 12.6 19.2
 4 -19 -6 -18.5 33.7
 -4 -19 6 -16.9 20.3
 -4 -20 2 386.26 62.09
 -4 -20 2 240.68 55.29
 -4 -20 2 208.98 109.49
 4 -20 -2 194.78 94.19
 4 -20 -2 377.76 83.99
 3 -20 -1 3.6 76.09
 -3 -20 1 24.1 18.2
 -3 -20 1 35.6 28.1
 3 -20 -1 15 31.8
 -2 -20 0 395.16 93.09
 -2 -20 0 420.66 68.69
 2 -20 0 326.67 116.79
 2 -20 0 367.16 77.99
 1 -20 1 9.8 60.99
 -1 -20 -1 -6 31.7
 -1 -20 -1 35.7 21.8
 0 -20 -2 155.98 64.99
 0 -20 2 143.39 69.89
 1 -20 -3 0.5 44.4
 -1 -20 3 -8.6 9.8
 -1 -20 3 33.8 47.8
 1 -20 -3 1.6 25
 -2 -20 4 444.36 67.59
 2 -20 -4 561.84 140.79
 -2 -20 4 411.66 104.99
 2 -20 -4 375.46 83.69
 -3 -20 5 46.8 32.5
 3 -20 -5 37 59.99
 -3 -20 5 17.2 83.39
 -3 -20 5 30.7 15.4
 3 -20 -5 3.8 36.7
 -4 -20 6 407.86 64.49
 4 -20 -6 251.37 95.79
 -4 -20 6 396.26 71.09
 -4 -20 6 273.47 123.79
 -4 -20 6 253.27 63.89
 4 -21 -2 187.48 59.89
 3 -21 -1 -5.7 30.3
 -3 -21 1 -13.3 23.9
 -3 -21 1 -2.3 16.5
 3 -21 -1 33.1 69.29
 -2 -21 0 23 35.5
 2 -21 0 19 32.8
 -2 -21 0 3.9 21.2
 2 -21 0 39 104.19
 1 -21 1 15.5 60.19
 -1 -21 -1 38 41.2
 -1 -21 -1 -18.2 22.5
 0 -21 2 279.67 93.19
 0 -21 -2 404.96 110.69
 1 -21 -3 248.88 58.79
 -1 -21 3 205.88 40.4
 -1 -21 3 130.29 62.79
 1 -21 -3 132.99 67.79
 2 -21 -4 170.08 81.09
 -2 -21 4 192.78 36.6
 -2 -21 4 134.09 54.19
 2 -21 -4 146.49 52.39
 3 -21 -5 27 57.79
 -3 -21 5 -57.59 71.49
 -3 -21 5 -0.7 13.3
 -3 -21 5 13 26.6
 3 -21 -5 27.4 36.9
 -3 -22 1 465.55 91.99
 -3 -22 1 358.36 73.79
 3 -22 -1 372.46 84.79
 2 -22 0 -25 32.6
 2 -22 0 -48.9 48.4
 -2 -22 0 -21.2 20.8
 -2 -22 0 10 34.3
 -1 -22 -1 255.07 76.69
 -1 -22 -1 230.38 52.49
 1 -22 1 373.86 68.99
 1 -22 1 192.28 105.19
 0 -22 -2 -49.4 38.8
 0 -22 2 96.99 63.09
 -1 -22 3 71.49 31.3
 1 -22 -3 56.19 59.29
 1 -22 -3 60.99 37.8
 2 -22 -4 28.7 60.39
 -2 -22 4 -49.3 75.59
 2 -22 -4 -11.4 33.9
 -2 -22 4 6.9 13.8
 -2 -22 4 20.6 38.9
 -3 -22 5 95.69 91.99
 -3 -22 5 333.27 76.49
 -3 -22 5 262.87 52.39
 3 -22 -5 249.18 67.09
 -2 -23 0 3 33.3
 2 -23 0 8.7 30.5
 -2 -23 0 -25.1 23.6
 1 -23 1 21.2 32.6
 1 -23 1 20.7 58.79
 -1 -23 -1 4.1 67.09
 -1 -23 -1 21.8 30.7
 0 -23 -2 203.08 74.39
 -1 -23 3 88.59 57.79
 1 -23 -3 57.19 57.29
 1 -23 -3 63.89 37.7
 -2 -23 4 188.78 107.59
 -2 -23 4 209.18 43.9
 2 -23 -4 127.89 50.29
 -2 -23 4 170.48 62.99
 0 -24 -2 27.3 47.7
 0 -24 2 -5.6 49.7
 -8 0 5 32 47.2
 8 0 -5 0.9 15.7
 8 0 -5 -12.2 28.7
 -7 0 4 83.49 41
 7 0 -4 36.6 16.1
 7 0 -4 70.79 65.79
 7 0 -4 6.7 41.7
 -6 0 3 -5.9 51.59
 6 0 -3 42.1 55.49
 -6 0 3 27.3 31.6
 6 0 -3 4.2 18.3
 6 0 -3 -2.3 8.6
 5 0 -2 1760.32 226.38
 -5 0 2 1826.22 237.98
 -5 0 2 1523.85 235.38
 5 0 -2 1483.55 246.58
 5 0 -2 1774.02 221.58
 4 0 -1 -14.4 26.8
 -4 0 1 -25.7 18.2
 4 0 -1 -2.9 9.5
 -4 0 1 -22.2 13.7
 4 0 -1 -3.7 5
 -3 0 0 1138.89 199.48
 3 0 0 1564.24 189.68
 -3 0 0 1514.85 189.08
 3 0 0 1506.45 207.58
 3 0 0 1508.65 194.78
 -2 0 -1 -6.1 11.5
 2 0 1 8.4 15.4
 -2 0 -1 1.8 2.5
 2 0 1 -1.8 9.1
 2 0 1 1 2.7
 -1 0 -2 274.97 37.6
 1 0 2 326.17 40.3
 -1 0 -2 309.37 40.4
 1 0 2 268.77 37.7
 0 0 3 -1.3 2.3
 0 0 -3 0 0.7
 0 0 -3 4.4 7.5
 0 0 3 -3.1 8.8
 0 0 -3 -0.3 2.6
 0 0 3 0.6 0.8
 -1 0 4 940.31 129.19
 1 0 -4 1067.89 131.49
 -1 0 4 780.72 131.89
 1 0 -4 1038.5 125.99
 -1 0 4 1099.09 127.29
 1 0 -4 859.01 124.09
 2 0 -5 1.7 7.1
 -2 0 5 -24.7 15.1
 2 0 -5 1.9 3.3
 2 0 -5 -22.1 18.4
 -2 0 5 -25.2 16.7
 3 0 -6 2400.06 296.57
 -3 0 6 2732.33 311.87
 3 0 -6 2008.7 299.57
 -3 0 6 2455.05 301.57
 3 0 -6 2078.29 312.37
 4 0 -7 8.7 6.6
 -4 0 7 -1.5 28
 4 0 -7 20.1 38.7
 4 0 -7 -14.8 12.9
 -4 0 7 -11.4 13
 5 0 -8 199.48 39.2
 -5 0 8 126.79 49.6
 5 0 -8 93.09 64.89
 -5 0 8 142.49 40.5
 5 0 -8 122.19 25.8
 6 0 -9 14.2 10.7
 6 0 -9 -0.7 11.5
 -6 0 9 0.8 33.8
 -6 0 9 16.2 23.1
 6 0 -9 -52.49 45.1
 7 0 -10 227.98 96.69
 -7 0 10 434.16 86.89
 -7 0 10 374.36 92.59
 7 0 -10 402.96 59.89
 8 1 -5 60.19 32.6
 8 1 -5 131.39 32.5
 8 -1 -5 115.19 89.59
 8 -1 -5 175.18 32.6
 -8 -1 5 171.68 55.29
 7 1 -4 101.79 69.99
 7 1 -4 221.18 36.8
 -7 1 4 166.88 50.99
 -7 -1 4 222.38 60.39
 7 -1 -4 179.38 34.3
 7 -1 -4 84.99 54.99
 7 -1 -4 147.09 76.79
 -6 1 3 226.98 71.29
 -6 1 3 315.97 83.29
 6 1 -3 343.67 52.79
 6 1 -3 379.06 64.19
 6 1 -3 278.87 87.39
 6 -1 -3 340.17 50.99
 -6 -1 3 353.36 79.19
 6 -1 -3 407.06 61.89
 -6 -1 3 329.17 83.79
 -5 1 2 126.29 44.3
 5 1 -2 133.69 29.1
 -5 1 2 115.89 43.5
 5 1 -2 45.3 55.79
 5 1 -2 214.78 36.6
 5 -1 -2 207.28 28.4
 5 -1 -2 66.09 56.19
 -5 -1 2 161.68 53.49
 5 -1 -2 170.18 37.3
 -4 1 1 -3 17.1
 4 1 -1 -16.8 8.5
 4 1 -1 -10.8 33
 -4 1 1 0.2 19.3
 4 1 -1 -11.1 4.5
 4 -1 -1 -40.9 25.3
 -4 -1 1 3.3 17.1
 -4 -1 1 -15.1 23.1
 4 -1 -1 -4.8 3.9
 4 -1 -1 0 10.9
 -4 -1 1 -1 3.8
 -3 1 0 144.69 36.8
 3 1 0 233.78 28
 3 1 0 74.69 45
 3 1 0 165.98 36.6
 3 -1 0 149.79 37.5
 -3 -1 0 285.07 49.9
 -3 -1 0 142.09 47.9
 -3 -1 0 154.68 25.3
 3 -1 0 192.48 26.3
 2 1 1 790.82 123.29
 2 1 1 996.8 120.39
 -2 1 -1 945.11 124.49
 -2 -1 -1 935.61 119.89
 2 -1 1 989 119.89
 2 -1 1 862.11 125.79
 -2 -1 -1 941.91 128.99
 -1 1 -2 3218.78 427.76
 -1 1 -2 3297.27 426.96
 1 1 2 3516.35 428.06
 1 1 2 3178.98 426.26
 1 -1 2 3251.07 425.86
 1 -1 2 2787.32 427.16
 -1 -1 -2 3638.14 428.56
 1 -1 2 3850.51 427.86
 -1 -1 -2 3377.46 426.16
 0 1 3 901.11 104.79
 0 1 3 731.53 108.69
 0 1 -3 773.12 104.89
 0 1 3 939.81 105.89
 0 -1 3 674.93 108.39
 0 -1 -3 653.33 107.89
 0 -1 -3 816.02 104.59
 0 -1 3 822.72 104.69
 -1 1 4 991.9 117.29
 -1 1 4 653.83 109.29
 -1 1 4 766.02 109.29
 1 1 -4 810.12 104.89
 1 1 -4 822.72 115.49
 -1 -1 4 910.71 105.89
 -1 -1 4 810.92 104.49
 1 -1 -4 880.41 108.39
 -1 -1 4 767.52 116.69
 -1 -1 4 806.52 111.99
 1 -1 -4 760.82 110.79
 -2 1 5 177.58 45.3
 -2 1 5 206.78 52.49
 2 1 -5 273.57 34
 2 1 -5 216.98 53.49
 2 1 -5 283.97 33.9
 2 -1 -5 228.18 41.4
 2 -1 -5 289.67 49.9
 -2 -1 5 232.08 33
 -2 -1 5 152.78 45
 3 1 -6 256.77 40.8
 -3 1 6 307.97 62.89
 3 1 -6 272.57 38.5
 -3 1 6 349.77 46.8
 -3 -1 6 319.17 37.6
 3 -1 -6 291.17 37.6
 3 -1 -6 192.88 60.29
 3 -1 -6 195.48 45.4
 -3 -1 6 208.98 57.09
 -4 1 7 430.36 63.49
 4 1 -7 313.17 78.69
 4 1 -7 474.65 52.89
 -4 1 7 385.46 73.99
 4 1 -7 339.37 53.49
 4 -1 -7 367.16 50.89
 -4 -1 7 346.77 76.19
 4 -1 -7 232.08 62.19
 -4 -1 7 450.85 62.39
 4 -1 -7 437.96 89.79
 5 1 -8 485.25 76.49
 5 1 -8 594.44 77.49
 -5 1 8 576.24 90.49
 -5 1 8 803.62 104.69
 -5 -1 8 726.93 123.09
 -5 -1 8 620.74 91.69
 5 -1 -8 608.74 121.39
 5 -1 -8 468.75 88.29
 5 -1 -8 594.74 76.39
 6 1 -9 333.47 95.99
 -6 1 9 444.66 85.39
 -6 1 9 443.06 76.99
 6 1 -9 431.06 58.09
 6 -1 -9 282.47 61.89
 6 -1 -9 399.06 99.29
 6 -1 -9 390.76 56.19
 -6 -1 9 403.36 76.59
 -6 -1 9 537.75 92.89
 -7 1 10 35.3 42.2
 7 1 -10 128.69 75.29
 -7 1 10 52.49 38.1
 7 1 -10 8.7 16.2
 7 -1 -10 52.79 66.69
 -7 -1 10 6.1 39.9
 -7 -1 10 41.7 33.5
 7 -1 -10 31.8 16.4
 8 2 -5 88.59 21.2
 8 2 -5 -11.8 17.6
 8 2 -5 41.5 24.1
 -8 2 5 52.49 50.89
 8 -2 -5 -14.4 31.2
 8 -2 -5 33 66.69
 -8 -2 5 99.79 49.3
 8 -2 -5 47.7 19.3
 7 2 -4 19.7 15.2
 -7 2 4 17.9 32.8
 -7 -2 4 39.5 43.6
 7 -2 -4 129.19 73.39
 7 -2 -4 -6.1 9.7
 7 -2 -4 -2.1 48.1
 6 2 -3 422.86 60.79
 -6 2 3 420.76 81.19
 -6 2 3 328.87 91.19
 6 2 -3 163.18 85.99
 6 -2 -3 485.05 68.59
 -6 -2 3 352.46 84.79
 6 -2 -3 438.76 111.79
 6 -2 -3 420.46 58.19
 -5 2 2 23.7 32.3
 5 2 -2 53.79 49.3
 5 2 -2 122.09 28.3
 -5 2 2 59.59 33.9
 5 2 -2 96.89 19.1
 -5 -2 2 16.9 39.9
 5 -2 -2 89.09 27
 -5 -2 2 64.19 13.9
 -5 -2 2 21.8 30.2
 5 -2 -2 62.19 13.7
 4 2 -1 958.6 118.59
 -4 2 1 1052.69 128.99
 4 2 -1 1046.8 122.79
 4 2 -1 681.63 139.69
 -4 2 1 732.83 128.59
 -4 -2 1 918.11 116.69
 -4 -2 1 974.1 137.09
 4 -2 -1 788.52 134.79
 -4 -2 1 737.73 126.79
 4 -2 -1 895.81 123.59
 4 -2 -1 855.31 116.79
 -3 2 0 40.9 26.8
 3 2 0 51.09 17.4
 -3 2 0 61.99 24.6
 -3 -2 0 44.4 9.7
 -3 -2 0 109.99 43.5
 3 -2 0 49.7 10.8
 2 2 1 571.54 72.49
 -2 2 -1 571.04 75.19
 2 2 1 497.75 75.39
 2 -2 1 600.64 71.69
 -2 -2 -1 435.46 82.89
 2 -2 1 464.55 77.39
 2 -2 1 540.35 77.59
 -2 -2 -1 595.74 72.09
 -1 2 -2 13.6 3.5
 1 2 2 9.8 4.9
 -1 -2 -2 11 4.6
 1 -2 2 10.9 4.6
 -1 -2 -2 8.7 3.6
 1 -2 2 15.4 5.2
 0 2 -3 379.06 64.79
 0 2 3 460.35 67.39
 0 2 3 506.75 66.09
 0 2 -3 496.95 69.19
 0 -2 -3 551.14 65.69
 0 -2 3 465.25 64.89
 0 -2 3 487.85 68.49
 0 -2 -3 539.95 64.19
 0 -2 -3 417.66 68.59
 -1 2 4 2469.85 282.97
 1 2 -4 2148.78 287.77
 -1 2 4 2057.29 287.37
 1 -2 -4 1874.71 282.47
 -1 -2 4 2383.36 287.47
 1 -2 -4 2431.16 284.17
 1 -2 -4 1807.22 285.67
 -1 -2 4 2256.97 278.57
 2 2 -5 1307.27 168.88
 2 2 -5 1030.1 179.08
 -2 2 5 1430.86 175.48
 -2 2 5 1561.04 172.78
 -2 -2 5 1308.77 168.28
 2 -2 -5 1357.76 177.48
 2 -2 -5 1079.49 174.58
 -2 -2 5 1410.16 181.58
 3 2 -6 473.05 60.99
 -3 2 6 396.86 75.69
 -3 2 6 464.85 67.39
 3 2 -6 385.36 87.29
 -3 -2 6 470.15 65.09
 3 -2 -6 469.65 80.99
 -3 -2 6 428.86 59.29
 3 -2 -6 469.05 59.39
 3 -2 -6 393.96 77.09
 -3 -2 6 444.56 82.39
 -4 2 7 1127.39 161.48
 4 2 -7 802.52 170.38
 4 2 -7 1131.19 147.89
 -4 2 7 1154.58 156.08
 4 -2 -7 1149.69 146.69
 -4 -2 7 1283.17 155.38
 -4 -2 7 1142.49 146.39
 4 -2 -7 1062.09 168.78
 -4 -2 7 1054.39 166.48
 5 2 -8 -10.1 8.5
 -5 2 8 -14 28
 5 2 -8 -0.5 55.79
 5 -2 -8 3.3 6.9
 -5 -2 8 22.4 57.19
 -5 -2 8 -11.4 18
 5 -2 -8 2.1 21.4
 5 -2 -8 30.5 44.4
 -6 2 9 111.19 35.2
 -6 2 9 145.89 47.1
 6 2 -9 64.59 63.89
 6 2 -9 115.39 24.4
 -6 -2 9 48.9 33.5
 6 -2 -9 109.39 61.99
 6 -2 -9 100.39 31.7
 -6 -2 9 164.28 57.19
 6 -2 -9 99.19 20.7
 7 2 -10 56.39 21.2
 -7 2 10 15.5 30.2
 7 2 -10 57.59 73.29
 -7 2 10 85.29 42.2
 -7 -2 10 128.29 56.69
 7 -2 -10 27.9 15.1
 -7 -2 10 25.7 33.5
 7 -2 -10 40.9 20.3
 7 -2 -10 37.9 59.69
 8 3 -5 2.2 9.8
 8 3 -5 1.1 15.1
 -8 3 5 -22.4 34
 8 -3 -5 36.9 66.39
 -8 -3 5 68.39 45.2
 8 -3 -5 -21 10.9
 8 -3 -5 -8.6 47.9
 7 3 -4 486.55 80.99
 -7 3 4 506.15 95.69
 -7 -3 4 597.94 110.69
 7 -3 -4 472.85 122.79
 7 -3 -4 610.14 78.49
 -6 3 3 47.4 32.3
 6 3 -3 89.69 23.1
 -6 3 3 67.49 40
 6 -3 -3 93.59 59.99
 -6 -3 3 90.19 17.1
 -6 -3 3 131.69 50.39
 6 -3 -3 78.89 18
 6 -3 -3 51.09 22.7
 -5 3 2 51.19 34.2
 5 3 -2 52.79 18.1
 5 3 -2 59.09 18.9
 5 -3 -2 86.69 16.6
 -5 -3 2 29.3 47.9
 -5 -3 2 37.5 32.5
 5 -3 -2 95.69 27.1
 5 -3 -2 225.68 60.89
 -5 -3 2 58.89 13.2
 4 3 -1 131.29 25.7
 -4 3 1 246.68 41.7
 4 3 -1 126.99 31.4
 -4 3 1 89.19 33.4
 -4 -3 1 127.19 21.3
 -4 -3 1 110.29 50.49
 4 -3 -1 144.79 21.5
 -4 -3 1 131.59 36.9
 4 -3 -1 89.29 40.7
 -3 3 0 213.08 51.39
 3 3 0 214.88 33.6
 -3 -3 0 108.49 54.29
 3 -3 0 219.78 29.7
 3 -3 0 91.99 45.1
 3 -3 0 334.27 44.9
 -3 -3 0 193.38 30.5
 2 3 1 580.44 96.49
 2 3 1 682.33 94.69
 -2 3 -1 812.92 95.09
 2 -3 1 786.72 98.99
 -2 -3 -1 835.52 94.49
 2 -3 1 588.94 99.39
 1 3 2 2148.78 294.97
 -1 3 -2 2462.95 294.87
 1 3 2 2539.75 297.07
 1 -3 2 2181.58 293.67
 -1 -3 -2 2136.19 295.37
 0 3 -3 318.17 49.8
 0 3 3 372.66 49.99
 0 3 3 339.87 50.09
 0 -3 -3 376.36 49.5
 0 -3 3 341.87 53.39
 0 -3 -3 296.67 52.19
 0 -3 3 321.07 49.8
 1 -3 -4 992.7 141.79
 1 -3 -4 916.71 137.79
 -1 -3 4 1213.78 145.19
 2 3 -5 -7 23.8
 -2 3 5 -8.8 14.1
 -2 3 5 4.6 7.4
 -2 3 5 32.8 23.6
 -2 3 5 6.4 12.9
 2 -3 -5 11.8 15.5
 2 -3 -5 -14.3 13.7
 -2 -3 5 11.5 4.9
 -2 -3 5 -14.7 20.1
 3 3 -6 205.88 32.1
 3 3 -6 173.88 54.39
 -3 3 6 161.18 45
 -3 3 6 259.67 40.7
 -3 -3 6 256.37 36.4
 -3 -3 6 212.08 55.79
 -3 -3 6 215.58 30.3
 3 -3 -6 202.28 58.59
 3 -3 -6 213.38 29.6
 3 -3 -6 156.68 44.2
 -4 3 7 89.79 34.1
 4 3 -7 136.59 24.9
 -4 3 7 97.79 27.7
 4 3 -7 112.09 53.49
 -4 -3 7 128.29 18.6
 -4 -3 7 96.09 42.4
 -4 -3 7 124.19 28.6
 4 -3 -7 101.59 18.4
 4 -3 -7 133.19 49.5
 4 -3 -7 82.29 38.5
 -5 3 8 1038.6 153.88
 5 3 -8 790.72 163.98
 -5 3 8 958.1 149.09
 5 3 -8 931.41 130.69
 -5 -3 8 1032.8 156.88
 5 -3 -8 984.3 128.69
 5 -3 -8 878.11 143.19
 -5 -3 8 1083.49 128.49
 5 -3 -8 960.9 193.38
 -5 -3 8 991.5 140.49
 -6 3 9 31.1 26.2
 6 3 -9 20.3 13.2
 6 3 -9 21.1 59.49
 -6 3 9 9.9 34.1
 6 -3 -9 22.5 23.4
 -6 -3 9 7.1 23
 -6 -3 9 -9.1 38.5
 6 -3 -9 -8.8 48.6
 6 -3 -9 11.1 8.9
 -7 3 10 199.68 60.09
 -7 3 10 241.98 65.49
 7 3 -10 220.88 87.19
 -7 -3 10 350.86 142.19
 7 -3 -10 108.89 76.99
 7 -3 -10 154.88 51.19
 7 -3 -10 259.27 39.6
 -7 -3 10 312.27 69.69
 -8 4 5 61.29 43.8
 -8 -4 5 122.89 55.29
 8 -4 -5 22.6 43.2
 8 -4 -5 111.09 80.39
 -7 4 4 13.6 32.1
 7 4 -4 1.6 10.9
 7 -4 -4 3.8 50.39
 -7 -4 4 -2.6 39.8
 7 -4 -4 4.9 9.2
 7 -4 -4 -8.8 52.29
 6 4 -3 70.69 20.8
 -6 4 3 87.79 35.2
 -6 4 3 49.2 39.7
 6 4 -3 88.89 22.5
 -6 -4 3 84.99 17.6
 6 -4 -3 109.49 57.09
 6 -4 -3 86.59 18.6
 -6 -4 3 153.38 54.99
 6 -4 -3 64.09 25.5
 -5 4 2 913.41 125.49
 -5 4 2 661.33 110.19
 5 4 -2 750.12 101.39
 5 4 -2 800.82 103.29
 -5 -4 2 735.93 97.89
 5 -4 -2 732.93 127.59
 5 -4 -2 706.93 106.89
 5 -4 -2 681.63 97.99
 -5 -4 2 694.03 129.49
 -4 4 1 269.47 71.09
 4 4 -1 391.16 56.09
 4 4 -1 414.16 54.99
 -4 4 1 369.06 62.79
 4 -4 -1 442.66 76.79
 4 -4 -1 418.26 61.39
 -4 -4 1 287.77 82.79
 -4 -4 1 353.46 51.09
 4 -4 -1 351.76 50.69
 3 4 0 2541.75 314.67
 -3 4 0 2567.94 316.87
 3 4 0 2129.29 313.17
 3 -4 0 2638.34 322.27
 3 -4 0 2365.36 318.27
 -3 -4 0 2389.06 312.47
 2 4 1 49.7 14
 -2 4 -1 76.79 12.5
 -2 4 -1 67.39 18
 2 4 1 69.49 17.9
 2 -4 1 57.49 17.1
 2 -4 1 50.89 17.3
 -2 -4 -1 66.19 13.7
 1 -4 2 470.25 62.79
 1 4 -4 7363.06 1127.09
 -1 4 4 8683.63 1125.49
 1 -4 -4 7834.42 1126.49
 1 -4 -4 9999 1124.19
 -1 -4 4 9460.95 1130.29
 1 -4 -4 9444.46 1127.19
 -2 4 5 604.14 125.99
 -2 4 5 821.52 109.89
 -2 4 5 1106.29 132.09
 2 -4 -5 792.02 113.79
 -2 -4 5 784.22 122.39
 2 -4 -5 784.02 119.59
 -3 4 6 1367.26 159.58
 -3 4 6 1103.59 163.58
 3 4 -6 847.02 167.08
 -3 4 6 1155.28 154.78
 3 -4 -6 996.5 159.48
 -3 -4 6 1264.77 152.48
 -3 -4 6 1152.68 148.59
 -3 -4 6 1090.39 168.18
 -4 4 7 201.08 48.6
 -4 4 7 183.78 42.9
 4 4 -7 96.29 57.49
 -4 -4 7 156.88 24.9
 -4 -4 7 208.98 40.3
 4 -4 -7 97.89 42.4
 4 -4 -7 63.89 43.5
 4 -4 -7 199.98 25.4
 -4 -4 7 223.08 58.09
 5 4 -8 -37.5 47
 -5 4 8 5.1 20.7
 5 -4 -8 31.9 29.3
 5 -4 -8 31.5 9.8
 -5 -4 8 30.6 22.7
 -5 -4 8 83.99 48.1
 -5 -4 8 36 9.4
 5 -4 -8 11.3 70.69
 -6 4 9 48.4 29.8
 -6 4 9 14.5 32.5
 6 4 -9 94.09 64.09
 -6 -4 9 81.59 32.3
 6 -4 -9 77.59 16.5
 6 -4 -9 22.6 55.09
 -6 -4 9 4 38.8
 6 -4 -9 34.7 29.8
 -7 4 10 339.07 78.79
 -7 4 10 235.28 71.39
 7 -4 -10 271.07 44.7
 7 -4 -10 270.57 63.69
 -7 -4 10 297.07 82.79
 7 -4 -10 355.06 101.09
 -7 -4 10 256.47 66.49
 7 5 -4 -10.6 11.9
 -7 5 4 18.5 28.6
 7 -5 -4 2.2 56.79
 -7 -5 4 69.39 45.6
 7 -5 -4 -41 59.89
 -7 -5 4 3.8 6.1
 7 -5 -4 -10.7 7.4
 6 5 -3 346.57 51.89
 -6 5 3 296.67 63.69
 -6 5 3 208.48 64.69
 6 -5 -3 364.36 58.49
 -6 -5 3 283.27 81.29
 6 -5 -3 305.07 46
 -6 -5 3 341.87 45.5
 6 -5 -3 133.29 73.59
 6 -5 -3 400.36 100.49
 -5 5 2 20.8 30.3
 5 5 -2 14 13.8
 5 5 -2 1.4 10
 -5 5 2 -10.9 21.6
 -5 -5 2 -3.3 44.8
 5 -5 -2 -9.8 18.9
 -5 -5 2 1.7 6.4
 5 -5 -2 -8.4 37
 5 -5 -2 1.1 6.2
 4 5 -1 -17.3 8.6
 -4 5 1 25.6 19.6
 4 5 -1 -7.2 8.6
 -4 5 1 24.1 23.6
 4 -5 -1 -9.4 27.5
 4 -5 -1 -0.7 4
 -4 -5 1 5.4 43
 -4 -5 1 -10.3 5
 -3 5 0 -5.6 15.8
 3 5 0 21.7 9.4
 -3 5 0 -14.4 14.4
 3 5 0 7.6 10.2
 3 -5 0 13 20.7
 -3 -5 0 1.6 5.4
 -3 -5 0 -44.3 37.5
 3 -5 0 3.3 13.4
 2 5 1 1394.06 211.98
 -2 5 -1 1806.02 211.78
 2 5 1 1779.92 217.18
 -2 5 -1 1617.94 212.58
 2 -5 1 1513.45 216.78
 2 -5 1 1704.33 214.68
 -2 -5 -1 1726.03 214.68
 -2 -5 -1 1605.04 212.48
 -1 5 -2 48.6 12.8
 1 5 2 71.09 22.2
 -1 -5 -2 71.99 18.8
 1 -5 2 33 16.9
 1 -5 2 83.49 11.3
 -1 -5 -2 79.19 15.5
 0 5 3 216.48 31.9
 0 -5 3 219.88 42.6
 0 -5 -3 184.08 35.9
 -1 5 4 559.14 66.29
 -1 5 4 423.86 71.39
 1 -5 -4 512.95 65.79
 1 -5 -4 348.27 71.39
 -1 -5 4 422.46 77.89
 1 -5 -4 415.06 73.69
 -2 5 5 207.38 33.3
 -2 5 5 143.89 31.5
 -2 5 5 142.79 57.89
 -2 -5 5 197.58 25.9
 -2 -5 5 100.79 24.5
 -2 -5 5 334.17 76.89
 2 -5 -5 132.19 42.5
 2 -5 -5 146.19 35.2
 3 5 -6 2.7 29.2
 -3 5 6 36.8 19.3
 -3 5 6 -2.4 13.5
 -3 5 6 10 11.3
 3 -5 -6 8.7 19
 -3 -5 6 6.6 5.6
 3 -5 -6 -14.4 23.4
 -3 -5 6 -19.9 31.5
 -3 -5 6 2.6 8.6
 4 5 -7 229.08 77.99
 -4 5 7 447.56 71.19
 -4 5 7 339.07 65.99
 4 -5 -7 369.26 52.39
 4 -5 -7 286.47 78.29
 -4 -5 7 387.46 53.19
 -4 -5 7 536.55 65.29
 -4 -5 7 286.97 83.89
 4 -5 -7 508.85 89.79
 -5 5 8 -4.8 27
 5 5 -8 1.9 50.29
 -5 5 8 -9 18.1
 5 -5 -8 -38.3 35.3
 5 -5 -8 10.8 6.6
 5 -5 -8 23.3 31.2
 -5 -5 8 25.7 41.3
 -5 -5 8 1.9 5.4
 -5 -5 8 22.3 21.8
 -6 5 9 744.73 108.49
 -6 5 9 516.55 101.69
 6 5 -9 476.25 134.09
 -6 -5 9 662.83 102.59
 -6 -5 9 652.73 84.09
 6 -5 -9 476.45 125.79
 6 -5 -9 484.05 105.79
 6 -5 -9 669.33 85.09
 -6 -5 9 784.52 126.19
 -7 5 10 2 45.9
 -7 5 10 58.39 36.8
 7 5 -10 -22.1 71.09
 -7 5 10 9.2 39.7
 -7 -5 10 66.99 51.39
 -7 -5 10 -4.3 31.3
 7 -5 -10 20.2 12
 7 -5 -10 11.6 27.1
 7 -5 -10 -73.49 54.49
 -7 6 4 38.9 29.1
 7 6 -4 10.4 14.9
 7 -6 -4 9.8 51.99
 7 -6 -4 22.1 12.1
 7 -6 -4 -62.59 51.69
 -7 -6 4 28.1 46.7
 -7 -6 4 4.3 8.3
 -6 6 3 -10.7 23.9
 -6 6 3 26.9 37.3
 6 6 -3 15.3 14
 6 -6 -3 85.59 62.69
 6 -6 -3 5.6 9.1
 -6 -6 3 46.4 49.2
 -6 -6 3 9.2 7.5
 6 -6 -3 -36.4 52.59
 6 -6 -3 27.1 19.3
 -5 6 2 548.65 99.79
 5 6 -2 600.34 82.69
 -5 6 2 598.44 89.09
 5 -6 -2 490.05 104.49
 5 -6 -2 591.64 88.39
 5 -6 -2 517.75 77.09
 -5 -6 2 562.34 118.49
 4 6 -1 987.1 124.69
 4 6 -1 991 127.89
 -4 6 1 691.13 135.69
 -4 6 1 984.6 129.39
 4 -6 -1 877.11 136.59
 -4 -6 1 888.81 122.89
 -4 -6 1 915.91 155.78
 4 -6 -1 979.5 131.19
 3 6 0 1703.73 226.58
 -3 6 0 1767.72 224.58
 3 6 0 1794.82 222.58
 3 -6 0 1755.82 228.78
 -3 -6 0 1697.03 222.48
 -3 -6 0 1361.26 242.38
 3 -6 0 1743.83 228.18
 2 6 1 596.34 88.29
 -2 6 -1 693.53 87.89
 2 6 1 689.43 97.69
 -2 -6 -1 725.63 91.79
 2 -6 1 716.63 93.39
 2 -6 1 682.13 97.29
 -2 -6 -1 626.24 90.29
 1 6 2 -7.6 12.5
 -1 -6 -2 -1.1 5.4
 -1 -6 -2 11.1 9.4
 0 6 3 944.81 108.09
 0 6 3 616.34 115.09
 0 -6 -3 774.72 113.69
 0 -6 3 846.32 110.49
 0 -6 -3 849.52 110.39
 -1 6 4 1898.21 218.58
 -1 6 4 1601.94 221.68
 -1 -6 4 1630.14 231.48
 1 -6 -4 1752.02 220.18
 1 -6 -4 1434.66 227.28
 1 -6 -4 1680.23 224.48
 -2 6 5 2899.81 380.66
 -2 6 5 2706.23 386.16
 -2 6 5 3217.88 380.86
 -2 -6 5 2708.33 395.86
 2 -6 -5 3007.8 384.06
 -3 6 6 528.45 99.69
 3 6 -6 510.75 110.59
 -3 6 6 671.73 92.69
 -3 6 6 570.74 91.49
 -3 -6 6 668.73 85.49
 3 -6 -6 612.34 97.79
 -3 -6 6 618.04 111.99
 -3 -6 6 751.12 88.59
 -5 6 8 -22.2 22.6
 -5 6 8 33.7 31.2
 5 6 -8 81.79 56.09
 -5 6 8 -3 16.7
 5 -6 -8 -19.7 34.5
 -5 -6 8 -0.9 6
 5 -6 -8 -1.4 30.5
 -5 -6 8 -26.2 16.3
 5 -6 -8 0.9 5.7
 -5 -6 8 -44.9 42.2
 -6 6 9 26.5 28.9
 -6 6 9 19.9 26.8
 -6 6 9 38.7 38.4
 6 6 -9 45.1 59.19
 -6 -6 9 66.39 14.2
 6 -6 -9 63.89 14.8
 -6 -6 9 24.4 45.3
 6 -6 -9 53.69 50.89
 6 -6 -9 36.5 34
 -7 6 10 133.19 51.09
 -7 6 10 175.98 61.79
 -7 6 10 216.68 70.79
 -7 -6 10 154.18 52.69
 7 -6 -10 169.38 31.4
 7 -6 -10 138.69 47.6
 7 -6 -10 82.89 70.89
 -7 -6 10 288.47 84.59
 -7 7 4 301.87 66.79
 7 -7 -4 309.47 46.8
 -7 -7 4 294.47 45.3
 -7 -7 4 258.77 86.69
 7 -7 -4 247.88 86.79
 6 7 -3 49.2 22.5
 -6 7 3 66.09 43.7
 6 -7 -3 -54.09 81.39
 -6 -7 3 86.99 17.4
 6 -7 -3 65.79 15.4
 -6 -7 3 23.5 50.39
 6 -7 -3 60.29 26.5
 6 -7 -3 45.8 75.49
 -5 7 2 104.69 44.2
 5 7 -2 232.18 45.4
 -5 7 2 194.48 48.4
 -5 -7 2 183.78 32.1
 5 -7 -2 239.38 59.39
 5 -7 -2 252.27 32.4
 5 -7 -2 222.68 45.4
 5 -7 -2 113.89 68.19
 -4 7 1 55.49 21.2
 -4 7 1 17.4 27.7
 4 -7 -1 32 19
 -4 -7 1 108.59 17.8
 -4 -7 1 -15.5 47.4
 4 -7 -1 23.9 28.8
 3 7 0 320.67 45.4
 3 7 0 323.17 54.39
 -3 7 0 340.77 45.3
 -3 7 0 181.28 57.29
 -3 7 0 366.06 49.8
 3 -7 0 289.97 54.19
 -3 -7 0 389.46 81.89
 -3 -7 0 319.87 46.8
 3 -7 0 375.76 55.99
 -2 7 -1 375.46 61.49
 2 7 1 533.85 62.19
 2 7 1 520.65 77.29
 2 -7 1 546.75 70.29
 -2 -7 -1 358.06 64.59
 2 -7 1 587.24 73.69
 -2 -7 -1 496.25 70.69
 -1 -7 -2 4116.69 496.25
 1 -7 2 3524.65 493.65
 0 7 3 343.07 42
 0 7 3 305.07 42.5
 0 -7 -3 312.87 48.1
 0 -7 -3 214.58 54.09
 0 -7 3 263.47 47.2
 -1 7 4 1066.39 167.08
 -1 7 4 1330.37 165.88
 1 -7 -4 1290.97 168.38
 1 -7 -4 1494.95 176.78
 -1 -7 4 1154.38 187.48
 -2 7 5 -62.79 40.2
 -2 7 5 7 13.3
 -2 7 5 5.7 20.2
 -2 -7 5 0.6 53.49
 2 -7 -5 -1.7 39.1
 2 -7 -5 52.59 28.5
 -3 7 6 327.17 59.19
 -3 7 6 250.97 72.19
 -3 7 6 461.85 62.59
 -3 -7 6 490.85 96.19
 3 -7 -6 325.47 66.49
 3 -7 -6 440.86 85.29
 -3 -7 6 345.37 51.99
 -3 -7 6 388.86 54.09
 -4 7 7 -25.3 25.9
 -4 7 7 -29.9 20.9
 -4 7 7 -20.7 15.8
 4 -7 -7 -36.2 35.1
 -4 -7 7 11.2 13.9
 4 -7 -7 -30.6 30.3
 -4 -7 7 -11.7 5.8
 -4 -7 7 -44 44.4
 -5 7 8 741.33 115.89
 -5 7 8 684.83 126.79
 -5 7 8 667.63 114.69
 5 -7 -8 741.63 100.29
 -5 -7 8 697.23 142.39
 5 -7 -8 739.03 129.49
 -5 -7 8 866.51 113.99
 -5 -7 8 777.22 100.49
 -6 7 9 -17.1 21.8
 -6 7 9 -24.5 26.9
 -6 7 9 -10.9 31.6
 -6 -7 9 2.7 6.5
 6 -7 -9 -6.1 28
 6 -7 -9 61.39 54.39
 -6 -7 9 -5.6 20.9
 -6 -7 9 49.99 52.99
 6 -7 -9 9.3 7.2
 -7 7 10 215.38 60.69
 -7 7 10 230.88 70.69
 -7 7 10 248.78 73.19
 -7 -7 10 276.87 66.39
 -7 -7 10 286.57 40.8
 -7 -7 10 225.28 77.49
 7 -7 -10 293.87 42.9
 7 -7 -10 175.98 81.59
 7 -7 -10 260.87 162.58
 7 8 -4 36.2 15.8
 -7 8 4 35.5 32.1
 -7 -8 4 7.9 56.79
 7 -8 -4 -59.79 51.59
 7 -8 -4 -0.4 14.6
 7 -8 -4 -50.79 52.49
 -6 8 3 231.78 68.99
 -6 8 3 273.47 53.89
 6 8 -3 198.98 49.7
 -6 -8 3 219.78 35.7
 -6 -8 3 264.77 82.99
 6 -8 -3 262.47 69.59
 6 -8 -3 202.08 35.3
 6 -8 -3 289.27 51.89
 6 -8 -3 165.08 76.39
 5 8 -2 107.99 30.2
 -5 8 2 137.99 47
 -5 8 2 136.39 32.3
 5 -8 -2 -17.2 60.69
 5 -8 -2 101.79 30.4
 5 -8 -2 131.19 21.6
 -5 -8 2 141.39 69.49
 5 -8 -2 187.78 52.89
 -5 -8 2 121.09 23.5
 4 8 -1 981.7 156.48
 -4 8 1 1189.38 153.58
 -4 -8 1 1139.39 149.59
 4 -8 -1 1266.77 157.98
 4 -8 -1 1123.59 162.18
 -4 -8 1 1139.29 187.38
 3 8 0 718.43 118.59
 -3 8 0 904.01 109.69
 -3 -8 0 882.71 112.19
 -3 -8 0 721.73 142.09
 2 8 1 494.65 99.39
 2 -8 1 800.12 95.79
 2 -8 1 618.94 91.49
 -2 -8 -1 699.03 89.89
 -2 -8 -1 650.33 94.39
 1 -8 2 -10.2 16.6
 0 8 3 876.71 113.49
 0 8 3 849.61 113.79
 0 8 3 623.74 130.29
 0 -8 -3 1134.69 132.89
 -1 8 4 969.9 144.79
 -1 8 4 1113.79 165.68
 -1 8 4 1046.5 145.49
 1 -8 -4 1307.57 149.29
 -2 8 5 343.27 90.39
 -2 8 5 502.75 66.49
 -2 8 5 348.57 70.89
 2 -8 -5 401.46 91.39
 2 -8 -5 506.65 70.69
 -2 -8 5 486.05 99.29
 -3 8 6 290.37 47.8
 -3 8 6 215.08 51.49
 -3 8 6 192.18 47.9
 -3 -8 6 186.38 37.7
 -3 -8 6 550.94 100.39
 -3 -8 6 286.67 39.5
 3 -8 -6 228.28 64.29
 3 -8 -6 240.58 56.79
 -4 8 7 242.98 63.39
 -4 8 7 243.68 54.89
 -4 8 7 311.27 56.09
 -4 -8 7 256.47 48
 4 -8 -7 205.78 58.29
 -4 -8 7 279.97 38.8
 -4 -8 7 199.18 74.49
 4 -8 -7 191.58 68.89
 -5 8 8 54.09 27.5
 -5 8 8 33.7 27.5
 -5 8 8 12.5 28.8
 -5 -8 8 0.2 18.7
 -5 -8 8 5 48.1
 5 -8 -8 -14.1 32
 5 -8 -8 -6.9 36.2
 5 -8 -8 6.5 6.4
 -5 -8 8 -3.7 6.3
 -6 8 9 29 32.4
 -6 8 9 42.3 37
 -6 8 9 98.99 36.8
 -6 -8 9 -2.7 24.5
 -6 -8 9 39.1 12
 6 -8 -9 37.2 34.4
 6 -8 -9 30.7 10.5
 6 -8 -9 22.1 50.89
 -6 -8 9 72.19 58.59
 -7 8 10 23.1 34.3
 -7 8 10 41.5 35.1
 -7 8 10 38.5 42.3
 7 -8 -10 58.99 16.2
 -7 -8 10 65.99 14.9
 7 -8 -10 3.6 34.2
 -7 -8 10 77.39 59.29
 7 -8 -10 19.4 64.89
 -7 -8 10 94.19 43.4
 -7 9 4 52.29 19
 -7 9 4 124.89 36
 -7 -9 4 161.58 75.89
 7 -9 -4 -33.3 43.2
 7 -9 -4 -31.4 55.39
 7 -9 -4 51.59 15.8
 -7 -9 4 110.69 20.2
 6 9 -3 311.67 63.89
 -6 9 3 362.46 64.69
 6 -9 -3 351.86 63.79
 6 -9 -3 313.87 82.89
 -6 -9 3 402.86 104.09
 6 -9 -3 307.27 49.4
 -6 -9 3 373.86 51.29
 -5 9 2 129.69 32.9
 5 9 -2 128.39 35.4
 -5 9 2 98.89 41.9
 5 -9 -2 150.58 37.3
 -5 -9 2 92.99 71.29
 5 -9 -2 135.99 22.7
 5 -9 -2 72.09 69.09
 -5 -9 2 140.49 26.8
 5 -9 -2 61.59 41
 -4 9 1 25.9 20.8
 4 9 -1 -5.1 23
 -4 9 1 27.6 9
 -4 -9 1 51.59 15.1
 -4 -9 1 19.2 56.29
 4 -9 -1 9.5 28.7
 4 -9 -1 9.7 21.4
 -3 9 0 61.69 12.1
 3 9 0 22.9 25
 -3 -9 0 87.69 20.1
 3 -9 0 150.98 64.09
 -3 -9 0 105.99 61.69
 3 -9 0 52.69 25.1
 3 -9 0 48.2 22.7
 -2 -9 -1 1408.76 174.78
 -2 -9 -1 1270.47 177.18
 2 -9 1 1349.77 174.78
 2 -9 1 1233.48 176.28
 1 9 2 1171.18 188.98
 -1 -9 -2 1380.56 182.88
 1 -9 2 1234.58 175.88
 -1 -9 -2 1424.26 174.18
 0 9 3 2325.87 291.47
 0 9 3 2264.47 291.37
 0 -9 3 2270.67 295.67
 0 -9 -3 2165.38 295.07
 -1 9 4 29.9 13.6
 -1 9 4 -68.59 35.8
 1 -9 -4 66.19 27.6
 -1 -9 4 53.39 32.5
 1 -9 -4 35.5 39.4
 -2 9 5 -6.1 14.5
 -2 9 5 17.3 35.4
 -2 9 5 16 12.6
 -2 -9 5 -37.4 33.7
 -2 -9 5 8.9 14.3
 2 -9 -5 12.8 16.4
 2 -9 -5 12.5 26.1
 -3 9 6 171.28 44.4
 -3 9 6 180.48 44
 -3 9 6 154.78 39.9
 -3 -9 6 209.38 33.8
 -3 -9 6 241.98 33.8
 3 -9 -6 133.99 61.49
 3 -9 -6 152.68 45
 -3 -9 6 210.68 35.3
 -3 -9 6 177.98 71.99
 -4 9 7 109.59 39
 -4 9 7 119.59 31.4
 -4 9 7 62.89 29.5
 4 -9 -7 31.9 36.8
 -4 -9 7 114.39 27.3
 4 -9 -7 88.29 52.39
 -4 -9 7 85.39 81.49
 -4 -9 7 87.89 18.6
 -5 9 8 259.87 54.49
 -5 9 8 157.18 45.7
 -5 9 8 262.07 64.09
 -5 -9 8 222.28 34.4
 -5 -9 8 257.67 82.89
 -5 -9 8 236.38 49.7
 5 -9 -8 123.19 58.29
 5 -9 -8 277.17 69.19
 -6 9 9 337.97 74.59
 -6 9 9 327.07 68.29
 -6 9 9 239.78 77.49
 6 -9 -9 302.17 76.79
 -6 -9 9 304.17 47.3
 6 -9 -9 333.57 47.2
 -6 -9 9 344.97 71.89
 6 -9 -9 368.26 93.39
 -6 -9 9 342.97 101.99
 -7 9 10 21.1 34.7
 -7 9 10 8.7 30.9
 -7 9 10 2.7 49.2
 -7 -9 10 75.59 38
 -7 -9 10 71.59 72.99
 7 -9 -10 7.9 33.7
 -7 -9 10 36.1 12.1
 7 -9 -10 -17.2 11.8
 7 -9 -10 37.1 61.29
 -7 10 4 47.4 29.8
 -7 10 4 6.8 10.3
 7 -10 -4 30.4 54.39
 -7 -10 4 -21.1 6.4
 -7 -10 4 28.6 62.49
 7 -10 -4 -41.5 49.4
 7 -10 -4 4.9 8
 -6 10 3 71.59 29.1
 -6 10 3 64.79 17.1
 6 10 -3 13.8 23.6
 6 -10 -3 -29.5 36.8
 6 -10 -3 54.99 14.9
 -6 -10 3 44.2 15
 6 -10 -3 47 61.09
 6 -10 -3 52.29 25.8
 -6 -10 3 108.29 66.49
 -5 10 2 825.12 101.99
 5 10 -2 614.24 112.59
 -5 10 2 790.72 108.89
 5 -10 -2 654.33 108.69
 5 -10 -2 880.51 125.89
 -5 -10 2 743.83 101.59
 -5 -10 2 686.43 153.18
 4 10 -1 37.7 29.9
 -4 10 1 63.79 14.2
 4 -10 -1 167.58 75.69
 4 -10 -1 99.49 35.6
 -4 -10 1 -7.1 58.19
 4 -10 -1 68.29 27.7
 -4 -10 1 35 14.9
 -3 -10 0 1537.75 225.68
 -3 -10 0 1914.11 229.48
 3 -10 0 1817.32 231.98
 3 -10 0 1638.64 230.08
 2 10 1 7.7 23
 2 -10 1 22.1 15.3
 -2 -10 -1 22.2 9.5
 -2 -10 -1 8.1 12.7
 2 -10 1 28.8 14.4
 2 -10 1 -28.4 42
 1 10 2 26.3 29.8
 -1 -10 -2 53.99 14.9
 -1 -10 -2 141.29 39.1
 1 -10 2 66.99 53.79
 1 -10 2 68.99 19.9
 0 10 3 20.8 9.3
 0 10 3 -10.9 24.4
 0 -10 3 20.2 14.6
 0 -10 -3 14.3 14.7
 0 -10 3 -5.5 40.9
 0 -10 -3 27.7 25.5
 -1 10 4 1664.03 213.88
 -1 10 4 1786.92 216.58
 1 -10 -4 1390.56 220.28
 1 -10 -4 1729.53 218.68
 1 -10 -4 1586.84 234.48
 -2 10 5 19.4 42.1
 -2 10 5 45 19.9
 -2 10 5 89.39 23.4
 -2 -10 5 25.4 20.9
 -2 -10 5 48.1 57.09
 2 -10 -5 21.2 36.2
 2 -10 -5 38.5 24.9
 -3 10 6 1240.68 169.68
 -3 10 6 1130.39 170.08
 -3 -10 6 1395.36 207.28
 3 -10 -6 894.91 188.98
 -3 -10 6 1213.18 162.18
 3 -10 -6 1255.97 174.68
 -3 -10 6 1355.26 162.98
 -4 10 7 39.2 26.3
 -4 10 7 18.4 23.1
 -4 10 7 -23.8 24.7
 -4 -10 7 -3.7 14.1
 -4 -10 7 44.7 12.2
 -4 -10 7 59.99 59.89
 4 -10 -7 -21.3 37.3
 4 -10 -7 -24.6 29.2
 -5 10 8 50.09 28.7
 -5 10 8 3.6 25
 -5 10 8 -7.4 30.9
 -5 -10 8 19.5 10.7
 5 -10 -8 13.6 37
 5 -10 -8 3.6 64.39
 -5 -10 8 9.6 67.09
 -5 -10 8 30.6 21.1
 -6 10 9 -36.3 60.09
 -6 10 9 21.2 30.3
 -6 10 9 -6.6 26.9
 6 -10 -9 11.6 46.2
 -6 -10 9 100.39 71.29
 6 -10 -9 6.2 7.4
 -6 -10 9 13.9 24.6
 6 -10 -9 -19.6 32
 -6 -10 9 -2.8 7.1
 -7 10 10 336.27 74.59
 -7 10 10 315.97 80.59
 -7 -10 10 353.86 50.69
 -7 -10 10 421.66 82.09
 7 -10 -10 468.55 116.39
 7 -10 -10 316.97 49.4
 7 -10 -10 213.18 68.69
 -7 11 4 212.28 49.4
 -7 11 4 147.19 54.69
 -7 11 4 237.18 38.3
 -7 -11 4 205.68 87.79
 7 -11 -4 150.78 31
 -7 -11 4 172.98 32
 7 -11 -4 140.39 72.09
 7 -11 -4 59.99 60.09
 6 11 -3 100.59 36
 -6 11 3 196.98 32.2
 -6 11 3 216.78 46.9
 -6 -11 3 143.89 30.3
 6 -11 -3 169.78 64.49
 -6 -11 3 195.68 86.19
 6 -11 -3 109.69 70.29
 6 -11 -3 169.98 27.8
 6 -11 -3 172.98 41.8
 -5 11 2 135.69 21.9
 5 11 -2 56.59 32.9
 -5 -11 2 148.39 79.29
 5 -11 -2 89.79 28.8
 -5 -11 2 124.39 25
 5 -11 -2 92.79 41.9
 5 -11 -2 -25.7 58.89
 4 -11 -1 83.89 68.49
 -4 -11 1 542.95 116.79
 4 -11 -1 -21 25
 3 11 0 28.5 32.9
 3 -11 0 92.19 64.79
 -3 -11 0 76.19 19.4
 3 -11 0 70.79 29.2
 2 -11 1 410.36 144.19
 2 -11 1 835.42 107.99
 2 -11 1 738.83 105.39
 -2 -11 -1 780.02 108.99
 -2 -11 -1 760.02 103.39
 -1 -11 -2 1733.73 209.58
 -1 -11 -2 1481.75 216.38
 1 -11 2 1525.55 208.88
 0 11 3 214.18 32.2
 0 11 3 105.59 43.1
 0 -11 -3 233.48 56.39
 0 -11 -3 238.08 40.1
 0 -11 3 155.08 53.09
 0 -11 3 204.28 35.8
 0 -11 3 216.88 39
 -1 11 4 472.35 57.59
 -1 11 4 380.76 61.79
 1 -11 -4 459.55 65.99
 -1 -11 4 323.47 80.79
 1 -11 -4 310.47 73.69
 1 -11 -4 422.86 90.79
 -2 11 5 333.57 95.39
 -2 11 5 38.5 15.7
 -2 -11 5 65.49 61.09
 2 -11 -5 37.1 41.7
 2 -11 -5 10.8 23.2
 -2 -11 5 31.7 25.7
 -3 11 6 57.39 27.4
 -3 -11 6 98.89 22.5
 -3 -11 6 50.59 19.5
 3 -11 -6 -15.2 45.9
 -3 -11 6 59.79 67.79
 3 -11 -6 30.8 33.2
 -4 11 7 146.49 42.7
 -4 11 7 257.27 56.49
 -4 -11 7 268.57 42.3
 4 -11 -7 134.49 61.29
 -4 -11 7 185.68 82.99
 4 -11 -7 222.78 56.19
 -4 -11 7 184.38 34.8
 -5 11 8 495.15 92.29
 -5 11 8 604.24 88.49
 -5 11 8 366.26 101.89
 -5 -11 8 514.65 73.69
 5 -11 -8 710.53 110.49
 -5 -11 8 663.53 142.59
 -5 -11 8 545.05 85.39
 5 -11 -8 385.16 110.79
 -6 11 9 126.89 51.49
 -6 11 9 219.88 54.09
 -6 11 9 312.87 71.89
 6 -11 -9 149.79 65.49
 6 -11 -9 193.08 73.69
 6 -11 -9 236.98 36.1
 -6 -11 9 255.77 58.79
 -6 -11 9 275.77 38.2
 -7 12 4 -1.6 33.2
 -7 12 4 -2.3 12.3
 7 -12 -4 -24.5 52.29
 7 -12 -4 -12.9 53.69
 -7 -12 4 -17.2 9.3
 7 -12 -4 20.2 10.7
 -6 12 3 277.07 39.6
 -6 12 3 147.49 46.4
 -6 -12 3 239.98 97.79
 6 -12 -3 394.76 61.79
 -6 -12 3 248.28 40.2
 6 -12 -3 84.29 65.79
 6 -12 -3 215.38 36.7
 6 -12 -3 199.28 73.39
 -5 12 2 1.3 18.9
 -5 12 2 4.7 6.6
 5 12 -2 -14.9 23.8
 -5 -12 2 -4.4 9.4
 5 -12 -2 -22.5 26.6
 5 -12 -2 -5.8 16.8
 -5 -12 2 -61.29 50.89
 5 -12 -2 -36.8 54.19
 -4 -12 1 367.36 118.59
 4 -12 -1 623.24 95.99
 -4 -12 1 597.74 84.89
 -4 -12 1 540.95 79.29
 4 -12 -1 514.85 86.39
 3 12 0 278.27 76.29
 3 -12 0 153.48 81.49
 -3 -12 0 235.68 42.7
 -3 -12 0 297.97 53.09
 3 -12 0 264.87 56.69
 3 -12 0 238.88 50.19
 2 12 1 570.24 101.79
 2 -12 1 517.25 76.59
 2 -12 1 292.47 102.99
 2 -12 1 448.76 75.29
 -2 -12 -1 496.95 80.49
 -2 -12 -1 550.84 72.59
 1 12 2 -6.7 30.1
 -1 -12 -2 9.1 20
 -1 -12 -2 21.8 10.6
 1 -12 2 3 14.2
 1 -12 2 -8.2 47
 0 12 3 257.27 91.19
 0 -12 3 421.76 61.39
 0 -12 -3 428.06 62.99
 0 -12 -3 312.17 79.29
 -1 12 4 348.47 46.9
 -1 12 4 322.67 54.19
 1 -12 -4 491.45 62.19
 1 -12 -4 492.35 72.09
 -1 -12 4 154.38 67.39
 1 -12 -4 339.07 94.99
 -1 -12 4 309.57 51.79
 -2 12 5 875.11 110.89
 2 -12 -5 751.72 147.79
 -2 -12 5 968.7 163.38
 2 -12 -5 898.51 121.09
 -2 -12 5 661.43 123.99
 -3 12 6 6.4 19.3
 3 -12 -6 -3 28.6
 -3 -12 6 17 62.89
 3 -12 -6 32.2 44.5
 -3 -12 6 10.1 16.9
 -3 -12 6 18.9 10.5
 -4 12 7 348.27 84.49
 -4 12 7 425.06 86.39
 -4 -12 7 518.55 131.69
 -4 -12 7 473.45 70.19
 4 -12 -7 581.44 97.09
 -4 -12 7 584.44 73.29
 4 -12 -7 355.46 112.09
 -5 12 8 6.3 27.1
 -5 12 8 7.5 25.4
 -5 -12 8 16.3 11.4
 -5 -12 8 -0.1 19
 5 -12 -8 57.69 39.7
 5 -12 -8 2.4 37.4
 -5 -12 8 -45 58.19
 -6 12 9 110.79 39
 -6 12 9 42.7 41.6
 -6 12 9 -30.3 37.3
 6 -12 -9 97.29 53.99
 6 -12 -9 93.09 53.29
 -6 -12 9 94.59 33.4
 -6 -12 9 178.18 92.09
 -6 -12 9 69.59 18.5
 6 -12 -9 64.79 16.5
 6 13 -3 8.5 33.5
 -6 13 3 138.39 39.5
 -6 13 3 58.99 17
 -6 -13 3 31.4 17.9
 6 -13 -3 85.59 51.99
 6 -13 -3 68.59 18.5
 6 -13 -3 50.29 65.09
 -6 -13 3 66.39 28.5
 -6 -13 3 34.2 93.19
 -5 13 2 24 10
 5 13 -2 2.4 28
 -5 13 2 25.4 24.5
 5 -13 -2 43 22.6
 -5 -13 2 -31.9 56.09
 -5 -13 2 45.8 17.1
 5 -13 -2 102.19 46.8
 5 -13 -2 34.5 61.69
 -5 -13 2 51.29 18.6
 4 13 -1 -0.6 28.8
 -4 -13 1 -87.19 62.89
 4 -13 -1 2.4 56.69
 4 -13 -1 -7.7 17.7
 -4 -13 1 -1.6 11.8
 -4 -13 1 -1.6 9.5
 4 -13 -1 23.3 29.5
 3 -13 0 192.88 47.2
 3 -13 0 260.97 48.6
 -3 -13 0 212.18 38.8
 -3 -13 0 202.78 49
 2 13 1 77.59 45.8
 -2 -13 -1 182.38 31.1
 2 -13 1 187.48 38.9
 -2 -13 -1 217.68 48.8
 2 -13 1 113.69 34.8
 2 -13 1 40.3 60.89
 -1 -13 -2 1287.07 159.28
 1 -13 2 1129.29 157.68
 -1 -13 -2 1079.69 171.48
 0 13 3 77.89 55.19
 0 -13 -3 137.89 46.6
 0 -13 3 232.28 37.1
 0 -13 -3 216.08 44.9
 0 -13 3 200.48 40.5
 -1 13 4 71.59 61.39
 -1 13 4 215.18 43
 1 -13 -4 323.67 60.69
 1 -13 -4 169.38 56.59
 -1 -13 4 198.98 34.5
 -1 -13 4 120.19 55.69
 -2 13 5 7.6 7.8
 -2 13 5 5.9 19.3
 2 -13 -5 58.49 27
 2 -13 -5 -15.5 47.3
 -2 -13 5 38.1 29.5
 -2 -13 5 -16.6 58.19
 -3 13 6 205.88 45.1
 -3 13 6 151.78 40.2
 -3 -13 6 196.78 30
 -3 -13 6 193.28 44.4
 3 -13 -6 112.29 65.09
 -3 -13 6 139.09 83.49
 3 -13 -6 111.79 42.8
 -4 13 7 100.79 35.1
 -4 13 7 146.19 43.9
 4 -13 -7 186.18 55.19
 -4 -13 7 79.49 77.09
 4 -13 -7 181.48 61.39
 -4 -13 7 147.69 31.8
 -5 13 8 499.35 99.49
 -5 13 8 490.95 96.69
 -5 -13 8 886.71 160.98
 5 -13 -8 676.63 114.79
 -5 -13 8 571.14 86.19
 -5 -13 8 617.44 79.79
 5 -13 -8 332.87 118.89
 -6 13 9 6.2 29.8
 -6 13 9 79.89 35.6
 6 -13 -9 46.4 47
 -6 -13 9 48.7 16
 -6 -13 9 91.79 36
 -6 -13 9 111.69 92.89
 6 -13 -9 54.19 13.7
 6 -13 -9 91.49 53.89
 -6 14 3 23.5 12.5
 6 14 -3 20.5 34.1
 -6 14 3 55.99 29.8
 -6 -14 3 32.1 86.09
 6 -14 -3 75.19 48.4
 -6 -14 3 34.8 16.5
 6 -14 -3 11.2 61.99
 -6 -14 3 22.1 17.7
 6 -14 -3 39.9 28.9
 5 -14 -2 213.08 86.09
 5 -14 -2 415.36 85.09
 -5 -14 2 434.86 67.29
 5 -14 -2 397.16 68.59
 -5 -14 2 374.36 111.39
 -5 -14 2 401.56 60.59
 4 14 -1 26.1 33.1
 -4 -14 1 93.29 22.3
 4 -14 -1 32.5 60.09
 -4 -14 1 66.29 20.2
 4 -14 -1 104.59 29.5
 -4 -14 1 47.1 69.19
 4 -14 -1 62.79 37.4
 3 -14 0 943.51 141.09
 -3 -14 0 881.51 135.39
 3 -14 0 962.3 138.89
 -3 -14 0 1127.79 142.99
 2 14 1 118.99 51.49
 2 -14 1 71.29 66.99
 2 -14 1 200.88 45.3
 -2 -14 -1 236.98 54.59
 2 -14 1 210.88 43.5
 -2 -14 -1 205.78 36
 -1 -14 -2 512.65 97.99
 0 14 3 -38.7 50.99
 0 14 3 19.7 16.9
 0 -14 -3 15.1 20.9
 0 -14 3 42 15.9
 0 -14 3 18 15.4
 0 -14 -3 23.1 31.1
 0 -14 3 21.9 7.1
 0 -14 3 14.4 42.8
 -1 14 4 866.21 128.29
 -1 -14 4 644.34 154.78
 -1 -14 4 937.01 122.19
 1 -14 -4 1161.98 134.59
 1 -14 -4 897.01 162.08
 -2 14 5 112.99 32.3
 2 -14 -5 150.38 40.2
 -2 -14 5 32.1 67.39
 2 -14 -5 8.5 82.69
 -2 -14 5 45.9 34.1
 -3 14 6 766.52 110.09
 -3 14 6 781.92 121.89
 -3 -14 6 878.91 120.29
 -3 -14 6 900.41 173.78
 3 -14 -6 702.93 124.79
 3 -14 -6 922.21 158.18
 -4 14 7 49.3 30.7
 -4 14 7 52.89 26.3
 -4 -14 7 27.1 17.2
 4 -14 -7 73.29 39.8
 -4 -14 7 30.2 72.19
 4 -14 -7 43.7 46.1
 -4 -14 7 86.19 21.5
 -5 14 8 -32.4 24.2
 -5 14 8 -20.8 26.6
 -5 -14 8 18.7 20.7
 -5 -14 8 2.2 12.2
 5 -14 -8 0.6 40.4
 5 -14 -8 27.8 46.7
 -5 -14 8 -62.79 68.09
 -6 14 9 12 30.5
 -6 14 9 18.8 35.6
 6 -14 -9 -67.79 50.79
 -6 -14 9 3.8 19.6
 -6 -14 9 36.8 82.69
 6 -14 -9 -18.6 41.2
 6 15 -3 182.58 61.69
 6 -15 -3 153.78 77.19
 -6 -15 3 333.77 114.09
 -6 -15 3 260.67 44
 6 -15 -3 373.66 84.69
 5 15 -2 -16.1 38.1
 5 -15 -2 -26.4 48.8
 -5 -15 2 12.6 13.5
 -5 -15 2 33.4 81.49
 5 -15 -2 0 18.8
 5 -15 -2 29.1 34.5
 -5 -15 2 10.4 14.6
 4 15 -1 29.7 41
 -4 -15 1 5.2 14.7
 -4 -15 1 0.9 10
 4 -15 -1 55.69 33.2
 4 -15 -1 -50.69 44.8
 -4 -15 1 -17.1 60.59
 4 -15 -1 21.7 19
 3 15 0 -8.7 34.9
 -3 -15 0 3 9
 3 -15 0 -34 42
 -3 -15 0 -7.3 17.5
 3 -15 0 -11.1 26.3
 3 -15 0 10.4 19.3
 -2 -15 -1 474.95 83.89
 2 -15 1 424.26 69.89
 2 -15 1 388.66 72.09
 -2 -15 -1 477.15 68.39
 2 -15 1 365.06 122.89
 1 15 2 36.4 49.4
 -1 -15 -2 5.8 24.9
 1 -15 2 -10.2 13.2
 1 -15 2 -22.5 42
 -1 -15 -2 12.8 14.2
 0 -15 3 428.36 81.69
 0 -15 -3 570.74 90.39
 0 -15 3 543.35 128.79
 0 -15 3 576.84 78.99
 0 -15 3 578.14 74.19
 0 -15 -3 576.54 114.59
 -1 15 4 -12.7 14.7
 -1 -15 4 29.2 43.7
 1 -15 -4 -9.2 21.6
 -1 -15 4 4.7 9.3
 1 -15 -4 -40.4 36.8
 1 -15 -4 -8.8 22.1
 -2 15 5 10.5 21.8
 -2 -15 5 87.99 93.49
 2 -15 -5 20.2 48.1
 -2 -15 5 34.5 32.6
 2 -15 -5 -5.7 31.1
 -3 15 6 11.9 7.7
 -3 15 6 69.39 34.9
 -3 -15 6 69.49 74.49
 -3 -15 6 4.8 19
 3 -15 -6 38.9 47.5
 3 -15 -6 11.8 30.9
 -4 15 7 248.28 67.79
 -4 15 7 277.77 51.09
 4 -15 -7 234.68 66.89
 -4 -15 7 258.87 100.89
 4 -15 -7 292.17 85.19
 -4 -15 7 302.57 50.89
 -5 15 8 -50.99 30.3
 -5 15 8 50.19 34.6
 5 -15 -8 25.8 53.09
 -5 -15 8 31.3 119.09
 5 -15 -8 23.5 43
 -5 -15 8 -1.7 14.2
 -6 15 9 233.98 60.49
 -6 15 9 225.98 69.79
 6 -15 -9 467.25 100.79
 -6 -15 9 433.06 55.09
 6 -15 -9 348.47 109.79
 6 -16 -3 63.19 46.9
 -6 -16 3 24.5 22.5
 6 -16 -3 46.4 57.59
 -6 -16 3 40.5 23.1
 5 16 -2 143.09 60.59
 -5 -16 2 230.28 47.5
 5 -16 -2 307.47 77.79
 5 -16 -2 285.77 58.79
 5 -16 -2 116.09 72.09
 -5 -16 2 60.79 156.28
 -5 -16 2 320.77 51.79
 -4 -16 1 471.75 73.49
 -4 -16 1 459.35 72.39
 4 -16 -1 447.86 99.59
 4 -16 -1 394.16 131.29
 -4 -16 1 348.47 116.79
 4 -16 -1 437.86 74.89
 3 -16 0 79.19 63.29
 -3 -16 0 203.08 39
 -3 -16 0 241.88 55.39
 3 -16 0 250.57 58.79
 3 -16 0 174.78 47.1
 2 -16 1 196.18 85.59
 2 -16 1 333.07 56.99
 -2 -16 -1 315.17 54.09
 -2 -16 -1 331.17 73.69
 2 -16 1 312.77 60.79
 1 16 2 32 53.39
 -1 -16 -2 12.5 29.4
 -1 -16 -2 -0.7 13.4
 1 -16 2 24.8 16.3
 1 -16 2 -25.5 47.3
 0 16 3 12.5 71.89
 0 -16 3 82.09 59.79
 0 -16 -3 101.89 80.69
 0 -16 -3 126.09 34.4
 0 -16 3 171.08 30.2
 -1 16 4 37.5 62.89
 -1 16 4 221.78 46.9
 -1 -16 4 218.78 32.2
 1 -16 -4 206.48 75.59
 -1 -16 4 173.68 61.49
 1 -16 -4 249.08 52.39
 1 -16 -4 194.48 46.4
 -2 16 5 629.74 102.69
 2 -16 -5 683.33 104.09
 -2 -16 5 675.63 117.49
 2 -16 -5 648.74 144.19
 -2 -16 5 595.44 149.59
 -3 16 6 149.09 46.8
 3 -16 -6 240.38 76.09
 3 -16 -6 273.67 64.09
 -3 -16 6 207.68 95.49
 -3 -16 6 200.68 56.29
 -4 16 7 42.1 31.7
 4 -16 -7 55.69 56.19
 4 -16 -7 85.19 44.7
 -4 -16 7 123.19 85.59
 -4 -16 7 54.39 22.6
 -5 16 8 15.8 18.8
 -5 16 8 18.1 33.8
 -5 -16 8 87.59 92.19
 -5 -16 8 -1.4 14.8
 5 -16 -8 11.5 48.8
 5 -16 -8 75.99 50.99
 5 17 -2 55.99 56.29
 -5 -17 2 129.09 33.5
 -5 -17 2 191.88 106.69
 5 -17 -2 236.38 52.09
 -5 -17 2 191.48 41.8
 5 -17 -2 113.59 53.99
 5 -17 -2 92.79 65.59
 4 17 -1 -8.3 47.7
 4 -17 -1 15.9 17.6
 4 -17 -1 -14 47.3
 4 -17 -1 15.8 38.6
 -4 -17 1 25.3 18.6
 -4 -17 1 44.9 71.09
 -4 -17 1 8.4 12.1
 3 17 0 113.69 66.99
 3 -17 0 285.67 59.19
 3 -17 0 190.38 45.4
 -3 -17 0 279.57 58.19
 3 -17 0 136.69 67.59
 2 17 1 -41.2 53.69
 -2 -17 -1 54.29 33.8
 -2 -17 -1 35.1 16.6
 2 -17 1 39.8 57.09
 2 -17 1 70.79 24.3
 2 -17 1 40.6 28
 1 -17 2 1073.69 125.89
 -1 -17 -2 805.62 147.29
 -1 -17 -2 746.43 126.69
 0 17 3 0.8 55.09
 0 -17 -3 57.49 45.5
 0 -17 3 37.5 94.59
 0 -17 -3 24.6 27.4
 0 -17 3 27.4 15.9
 -1 -17 4 552.94 68.89
 -1 -17 4 510.65 72.49
 1 -17 -4 375.56 121.39
 1 -17 -4 520.95 86.39
 -1 -17 4 344.07 115.29
 -2 17 5 -10.5 20.9
 -2 -17 5 284.17 70.79
 2 -17 -5 12.1 28.7
 2 -17 -5 56.29 49.6
 -2 -17 5 -52.99 58.79
 -3 17 6 115.89 39.2
 3 -17 -6 217.88 51.99
 -3 -17 6 265.47 100.99
 3 -17 -6 83.29 56.89
 -3 -17 6 146.39 40.7
 -4 17 7 51.59 34.9
 4 -17 -7 -25.9 30.9
 -4 -17 7 15.6 17.9
 -4 -17 7 0.9 75.59
 4 -17 -7 43 55.89
 5 -17 -8 609.44 121.19
 5 -17 -8 435.86 132.09
 -5 -17 8 540.45 148.49
 -5 -18 2 81.89 27.4
 -5 -18 2 97.29 30
 5 -18 -2 75.69 69.39
 -5 -18 2 264.07 105.09
 5 -18 -2 166.78 56.69
 4 18 -1 172.88 78.19
 -4 -18 1 375.06 56.59
 4 -18 -1 115.29 79.49
 4 -18 -1 248.98 64.39
 4 -18 -1 327.87 60.29
 -4 -18 1 240.68 110.69
 -4 -18 1 265.77 53.69
 3 -18 0 405.56 70.69
 3 -18 0 394.36 81.29
 -3 -18 0 481.35 72.49
 -3 -18 0 454.95 83.49
 2 18 1 25.8 59.79
 2 -18 1 5.2 15.1
 -2 -18 -1 -12.9 26.8
 -2 -18 -1 18.5 15.2
 2 -18 1 13 60.59
 1 18 2 -69.59 51.39
 -1 -18 -2 -27.5 15.7
 -1 -18 -2 11.9 34.2
 1 -18 2 -15.2 11.3
 1 -18 2 -6.9 55.99
 0 18 3 21.4 56.39
 0 -18 -3 18.2 26.6
 0 -18 3 19.8 58.19
 0 -18 -3 -29.1 28.2
 -1 -18 4 165.58 112.79
 -1 -18 4 207.68 33
 1 -18 -4 130.19 61.09
 1 -18 -4 181.98 47.5
 -2 18 5 250.57 62.19
 -2 -18 5 273.57 99.19
 2 -18 -5 294.17 63.59
 2 -18 -5 193.68 75.59
 -2 -18 5 258.97 78.79
 -3 18 6 106.29 43.6
 3 -18 -6 245.08 56.59
 -3 -18 6 289.37 107.39
 -3 -18 6 185.58 47.8
 3 -18 -6 149.59 66.49
 -4 18 7 117.69 47.4
 -4 -18 7 123.49 36
 4 -18 -7 227.78 149.99
 -4 -18 7 183.38 45.9
 4 -18 -7 183.18 59.69
 -5 18 8 25.2 35.8
 5 -18 -8 24.4 42.5
 -5 -18 8 -35.6 12.1
 5 -18 -8 17 49.1
 5 -19 -2 68.09 45.8
 -5 -19 2 10.6 20.1
 4 19 -1 7 55.59
 4 -19 -1 33.1 65.79
 4 -19 -1 47.3 41
 -4 -19 1 23.2 23
 4 -19 -1 65.69 30.8
 -4 -19 1 -2.1 77.89
 -4 -19 1 55.99 21.5
 3 19 0 96.99 68.99
 -3 -19 0 40.1 28.6
 -3 -19 0 28.3 18.3
 3 -19 0 26.8 19.9
 3 -19 0 33.8 60.39
 -2 -19 -1 666.53 105.19
 -2 -19 -1 533.65 83.29
 2 -19 1 276.77 110.19
 2 -19 1 476.05 87.39
 2 -19 1 544.95 79.79
 1 19 2 84.39 68.79
 -1 -19 -2 305.97 82.79
 -1 -19 -2 209.78 42.5
 1 -19 2 187.18 37.5
 1 -19 2 107.69 69.09
 0 -19 3 640.64 142.29
 0 -19 -3 399.96 90.89
 0 -19 -3 689.03 124.09
 1 -19 -4 94.99 37.4
 -1 -19 4 40.6 49.3
 1 -19 -4 57.79 49.6
 -1 -19 4 68.69 17.3
 2 -19 -5 -26.3 42
 -2 -19 5 43.4 12.8
 -2 -19 5 -12.5 53.49
 -2 -19 5 27.1 71.79
 2 -19 -5 -4.2 28
 -3 19 6 4.1 30
 3 -19 -6 69.79 54.19
 -3 -19 6 -1.3 27.1
 -3 -19 6 -54.09 75.89
 3 -19 -6 14.9 33.7
 -4 19 7 123.89 57.59
 4 -19 -7 238.78 82.79
 -4 -19 7 198.78 59.09
 4 -19 -7 266.67 71.89
 -4 -19 7 295.47 113.69
 -4 -19 7 369.06 59.69
 4 -20 -1 96.89 40.5
 4 -20 -1 61.29 72.39
 -4 -20 1 30.3 22.3
 -4 -20 1 48 27.4
 -4 -20 1 18.3 71.69
 3 20 0 127.39 84.19
 3 -20 0 349.17 76.29
 3 -20 0 187.68 107.09
 -3 -20 0 393.26 78.79
 3 -20 0 480.55 66.69
 -3 -20 0 310.97 61.99
 2 20 1 47.8 60.99
 2 -20 1 -13.2 56.49
 2 -20 1 37.5 32.1
 -2 -20 -1 15.7 21.1
 2 -20 1 23.7 18.6
 -2 -20 -1 11.8 27.9
 1 -20 2 20.7 17
 1 -20 2 -11.4 57.49
 -1 -20 -2 34.4 37.7
 -1 -20 -2 9.9 22.1
 0 -20 -3 92.09 33.2
 0 -20 3 59.59 55.59
 0 -20 -3 69.69 46.3
 -1 -20 4 311.97 70.19
 -1 -20 4 356.66 112.69
 1 -20 -4 289.17 91.19
 -1 -20 4 404.66 56.49
 1 -20 -4 370.36 73.99
 2 -20 -5 32.6 34.2
 -2 -20 5 53.99 16.5
 -2 -20 5 32 39
 -2 -20 5 36.5 71.89
 2 -20 -5 21.2 48.3
 -3 -20 6 237.98 118.49
 -3 -20 6 388.66 54.99
 -3 -20 6 300.97 86.79
 3 -20 -6 222.38 66.79
 3 -20 -6 161.58 83.79
 -4 20 7 -12.7 33.3
 -4 -20 7 -1.4 19.1
 4 -20 -7 20.6 83.09
 -4 -20 7 80.29 82.99
 4 -20 -7 36.1 41.1
 -4 -20 7 -27.5 18.2
 -3 -21 0 50.79 31.8
 -3 -21 0 29.5 20.6
 3 -21 0 20.4 61.99
 3 -21 0 70.29 41.1
 -2 -21 -1 134.89 47.2
 2 -21 1 191.78 146.99
 2 -21 1 152.38 48.6
 -2 -21 -1 165.58 41.6
 -1 -21 -2 437.86 86.09
 -1 -21 -2 555.34 115.29
 1 -21 2 419.16 119.79
 0 -21 3 154.48 70.69
 0 -21 -3 152.08 67.69
 -1 -21 4 55.79 18.6
 1 -21 -4 91.99 61.39
 -1 -21 4 99.29 56.39
 1 -21 -4 81.59 40
 -1 -21 4 117.39 33.9
 2 -21 -5 -8.2 46.2
 -2 -21 5 -68.39 71.09
 -2 -21 5 6 33.6
 -2 -21 5 -8.5 8.9
 2 -21 -5 17.2 31.8
 -3 -21 6 69.59 37.6
 3 -21 -6 108.19 72.99
 -3 -21 6 11.7 79.39
 3 -21 -6 31.1 61.79
 -3 -21 6 70.49 22.2
 3 -22 0 15.8 34.5
 -3 -22 0 27.6 28.9
 2 -22 1 255.87 65.69
 2 -22 1 211.08 92.09
 -2 -22 -1 233.28 74.69
 -2 -22 -1 149.39 45.3
 -1 -22 -2 0.6 30.1
 -1 -22 -2 -14 34.1
 1 -22 2 35.3 66.89
 0 -22 3 159.38 75.99
 0 -22 -3 70.39 52.69
 -1 -22 4 -5 15.1
 1 -22 -4 28.1 47.4
 -1 -22 4 52.89 49.6
 -1 -22 4 1.5 29.4
 1 -22 -4 26.6 34.6
 2 -22 -5 458.25 92.49
 2 -22 -5 368.66 109.99
 -2 -22 5 433.26 65.49
 -2 -22 5 355.26 106.29
 -2 -22 5 329.07 122.79
 2 -23 1 90.79 39
 -2 -23 -1 30.8 30.9
 -2 -23 -1 44 34.7
 -1 -23 -2 368.76 72.09
 1 -23 2 314.97 104.39
 1 -23 2 388.46 76.79
 -1 -23 -2 394.56 106.29
 0 -23 -3 152.48 63.69
 1 -23 -4 42.9 40
 -1 -23 4 36.6 48.2
 1 -23 -4 31 49.5
 -2 -23 5 -12.2 13.1
 -2 -23 5 -13.4 78.59
 -2 -23 5 10.2 39.8
 2 -23 -5 -15.1 34
 -2 -23 5 -4.4 28.8
 8 0 -4 25 43.5
 -8 0 4 100.39 49.8
 8 0 -4 12.5 16.8
 7 0 -3 21.3 61.39
 -7 0 3 48.3 38.9
 7 0 -3 -5.5 10.2
 6 0 -2 1039.2 144.09
 6 0 -2 1058.99 138.49
 -6 0 2 1170.68 158.18
 6 0 -2 734.53 169.28
 5 0 -1 11.5 46
 5 0 -1 -40.1 13.3
 -5 0 1 22.3 33.3
 5 0 -1 14.9 8.9
 4 0 0 1607.44 196.88
 -4 0 0 1616.34 209.08
 4 0 0 1233.98 212.48
 4 0 0 1509.55 201.98
 -3 0 -1 84.99 32.3
 3 0 1 -3 5.3
 3 0 1 -0.6 15.4
 -2 0 -2 593.24 77.99
 2 0 2 612.24 78.39
 -2 0 -2 550.04 84.59
 -2 0 -2 629.64 80.99
 0 0 -4 2930.51 455.55
 0 0 -4 3446.76 450.15
 0 0 4 4073.99 452.45
 0 0 -4 3801.32 452.55
 0 0 4 3320.97 456.65
 1 0 -5 33.1 21.1
 2 0 -6 2218.68 284.07
 2 0 -6 2060.49 293.97
 -2 0 6 2081.79 291.97
 2 0 -6 2418.26 286.17
 -3 0 7 4.5 8.8
 3 0 -7 -1.2 4.1
 -3 0 7 -24.2 21.3
 3 0 -7 -53.99 26.5
 3 0 -7 -9.5 7.9
 -4 0 8 103.39 26.5
 4 0 -8 116.69 27
 -4 0 8 46 34.1
 4 0 -8 130.29 48.5
 4 0 -8 64.79 15.3
 5 0 -9 28.8 11.1
 5 0 -9 -42.5 40.7
 -5 0 9 26.9 34.9
 -5 0 9 -1.6 16.5
 5 0 -9 6.2 8.1
 -6 0 10 492.25 98.79
 -6 0 10 436.36 86.09
 6 0 -10 482.65 118.39
 6 0 -10 435.26 70.19
 6 0 -10 526.15 67.29
 7 0 -11 -10.7 13
 7 0 -11 84.29 75.39
 -7 0 11 -1.9 28.2
 -8 1 4 87.39 43.1
 8 1 -4 54.89 22
 8 1 -4 70.19 41.6
 8 -1 -4 148.19 88.79
 8 -1 -4 27.1 18
 8 -1 -4 -11.8 44.3
 -7 1 3 169.68 52.69
 7 1 -3 140.69 31.1
 7 -1 -3 143.09 30.9
 7 -1 -3 219.18 47.9
 -7 -1 3 163.58 54.09
 7 -1 -3 133.39 74.49
 -6 1 2 32.5 33.3
 6 1 -2 10.7 16.9
 6 1 -2 21.5 13.1
 6 -1 -2 43.1 53.69
 6 -1 -2 40.4 19.6
 -6 -1 2 10.4 54.19
 6 -1 -2 24.5 11.4
 5 1 -1 24.9 10.6
 -5 1 1 -9.5 25.7
 5 1 -1 17.1 18
 5 1 -1 36.6 50.19
 5 -1 -1 56.09 48.7
 5 -1 -1 15.6 9.2
 5 -1 -1 10.2 17.9
 -5 -1 1 22.4 33.2
 -4 1 0 133.09 36.5
 4 1 0 173.38 24.6
 4 1 0 129.49 32.3
 4 1 0 69.19 43.2
 4 -1 0 99.19 21.6
 -4 -1 0 173.58 22
 4 -1 0 123.49 29
 -4 -1 0 157.48 42.2
 4 -1 0 108.09 44.4
 3 1 1 745.93 116.59
 3 1 1 836.02 110.59
 -3 1 -1 909.11 121.39
 3 -1 1 815.52 129.09
 -3 -1 -1 729.13 126.09
 3 -1 1 1003.4 120.29
 3 -1 1 859.61 110.09
 -3 -1 -1 831.72 109.79
 -2 1 -2 1168.08 153.38
 2 1 2 1212.38 149.69
 2 -1 2 905.51 154.28
 -2 -1 -2 1310.67 152.48
 -2 -1 -2 1090.99 157.38
 -2 -1 -2 1187.58 149.19
 2 -1 2 1278.67 149.29
 2 -1 2 987.9 155.08
 1 1 3 2328.67 319.97
 -1 1 -3 2644.14 323.37
 1 1 3 2761.12 322.87
 -1 1 -3 2133.89 320.47
 -1 -1 -3 2536.05 319.87
 1 -1 3 2514.35 322.27
 1 -1 3 2500.45 319.67
 -1 -1 -3 2708.23 323.57
 0 1 4 520.85 82.89
 0 1 -4 481.25 80.89
 0 1 4 642.34 75.89
 0 1 -4 603.64 76.39
 0 -1 -4 594.94 89.09
 0 -1 4 553.04 75.59
 0 -1 -4 629.84 76.09
 0 -1 4 447.26 82.19
 -1 1 5 -3.2 15.5
 1 -1 -5 -26.9 16.9
 -1 -1 5 120.29 31.2
 -2 1 6 641.84 100.39
 2 1 -6 701.83 92.29
 2 1 -6 716.13 106.49
 -2 1 6 720.03 108.59
 -2 -1 6 741.83 91.89
 2 -1 -6 627.74 101.89
 2 -1 -6 732.53 96.59
 2 -1 -6 741.23 91.89
 -2 -1 6 687.83 103.39
 3 1 -7 905.51 138.29
 -3 1 7 918.41 124.89
 3 1 -7 846.22 119.59
 3 1 -7 916.51 120.19
 -3 1 7 1042.4 134.59
 -3 -1 7 883.71 135.29
 3 -1 -7 959.3 119.69
 -3 -1 7 1069.39 125.59
 3 -1 -7 776.72 134.39
 3 -1 -7 884.51 124.99
 -3 -1 7 965.4 119.49
 4 1 -8 1189.88 143.89
 -4 1 8 1150.48 160.38
 -4 1 8 1184.78 153.58
 4 1 -8 1029.5 144.79
 4 -1 -8 1116.29 144.39
 -4 -1 8 1289.67 153.18
 4 -1 -8 968.7 168.48
 -4 -1 8 1108.09 162.18
 4 -1 -8 920.81 149.49
 5 1 -9 427.26 100.99
 5 1 -9 436.46 57.39
 -5 1 9 479.05 81.49
 -5 1 9 465.25 75.09
 5 -1 -9 316.27 86.69
 5 -1 -9 366.36 55.49
 -5 -1 9 360.76 84.19
 5 -1 -9 363.16 70.19
 -5 -1 9 396.96 68.79
 6 1 -10 31.8 57.29
 -6 1 10 40.1 38.1
 -6 1 10 13.3 20.7
 6 1 -10 30.4 13.6
 -6 -1 10 -1.5 36.9
 6 -1 -10 -12.5 8.1
 -6 -1 10 4.1 22.4
 6 -1 -10 29.2 56.79
 -7 1 11 -7.9 25.4
 7 1 -11 -25.3 13
 7 1 -11 -23.6 92.09
 7 -1 -11 -14.8 12
 -7 -1 11 78.99 78.49
 7 -1 -11 5.1 5.6
 -7 -1 11 16.5 27.5
 7 -1 -11 7.7 61.09
 8 2 -4 -11.2 17.5
 -8 2 4 113.09 44
 8 2 -4 35.5 31.3
 -8 -2 4 23.6 39.4
 8 -2 -4 36 68.19
 8 -2 -4 -44.3 54.79
 8 -2 -4 -4.6 13.1
 -7 2 3 220.08 55.19
 7 2 -3 172.18 39
 7 -2 -3 100.09 69.59
 7 -2 -3 176.78 34.8
 -7 -2 3 159.28 53.99
 7 -2 -3 225.08 48.9
 6 2 -2 0.1 12.3
 6 2 -2 6.8 20.1
 -6 2 2 58.39 35.5
 6 -2 -2 42.2 12.9
 -6 -2 2 33.5 35.3
 6 -2 -2 13.8 54.29
 6 -2 -2 23.6 18.4
 5 2 -1 1707.83 209.68
 5 2 -1 1507.75 204.88
 -5 2 1 1629.04 216.98
 5 -2 -1 1710.43 212.08
 5 -2 -1 1464.25 203.58
 -5 -2 1 1477.75 224.18
 5 -2 -1 1379.16 226.78
 -4 2 0 91.89 30.3
 4 2 0 101.59 20
 4 2 0 83.79 22.5
 4 -2 0 98.09 28.6
 4 -2 0 107.99 17.3
 -4 -2 0 72.79 15.7
 4 -2 0 84.59 39.2
 3 2 1 262.07 34.7
 3 2 1 262.97 43.7
 -3 -2 -1 143.69 51.79
 3 -2 1 244.78 48.1
 -3 -2 -1 206.28 32.1
 3 -2 1 229.88 31.9
 3 -2 1 180.58 47.8
 -2 2 -2 -0.1 4.2
 -2 2 -2 5.1 9.8
 2 2 2 -16.3 12.9
 2 -2 2 -14.2 14
 -2 -2 -2 19.9 23.2
 2 -2 2 -0.6 3
 -2 -2 -2 3.6 4.5
 1 2 3 937.51 117.59
 1 -2 3 836.62 116.59
 -1 -2 -3 844.32 114.89
 -1 -2 -3 962.2 118.59
 0 2 -4 352.16 59.09
 0 2 4 341.87 48.4
 0 2 4 266.57 52.59
 0 -2 -4 251.37 54.59
 0 -2 4 329.67 46.5
 0 -2 -4 412.66 48.2
 0 -2 4 284.87 52.59
 0 -2 -4 328.57 46
 -1 2 5 1088.99 178.58
 1 2 -5 1676.53 183.88
 -1 2 5 1483.65 178.18
 -1 -2 5 1343.37 181.48
 -1 -2 5 1309.87 173.08
 1 -2 -5 1236.98 183.28
 1 -2 -5 1332.67 178.88
 1 -2 -5 1450.05 178.38
 -1 -2 5 1367.86 184.98
 -2 2 6 530.35 73.59
 2 2 -6 644.04 85.79
 2 2 -6 471.05 65.19
 -2 2 6 489.95 81.09
 2 -2 -6 438.26 76.69
 -2 -2 6 500.25 64.19
 -2 -2 6 566.54 80.29
 2 -2 -6 436.46 71.19
 3 2 -7 160.88 24.5
 -3 2 7 260.07 33.2
 -3 2 7 173.18 43.3
 3 2 -7 181.08 52.49
 3 -2 -7 167.28 37.5
 -3 -2 7 77.19 40.9
 3 -2 -7 179.98 45.1
 -3 -2 7 129.99 21.9
 3 -2 -7 142.29 22.1
 -3 -2 7 174.88 31.2
 4 2 -8 26 10.7
 4 2 -8 67.79 43.3
 -4 2 8 66.29 21.8
 -4 2 8 29.6 27.7
 4 -2 -8 30.2 8.9
 -4 -2 8 22.1 7
 -4 -2 8 49.1 39.7
 4 -2 -8 57.09 40.1
 4 -2 -8 36.8 22.2
 5 2 -9 172.58 70.09
 5 2 -9 163.08 33.3
 -5 2 9 220.98 52.69
 -5 2 9 179.18 52.59
 5 -2 -9 193.68 67.49
 5 -2 -9 161.78 45.3
 -5 -2 9 191.88 59.89
 5 -2 -9 226.98 31.4
 -5 -2 9 258.27 49.5
 6 2 -10 81.99 62.79
 6 2 -10 52.09 19.1
 -6 2 10 85.89 42.1
 -6 2 10 74.59 30.8
 -6 -2 10 83.89 32.3
 6 -2 -10 181.48 38.9
 -6 -2 10 33.7 43.5
 6 -2 -10 124.69 62.99
 6 -2 -10 55.79 16.1
 7 2 -11 314.87 169.68
 -7 2 11 290.07 75.09
 7 -2 -11 289.57 46.5
 7 -2 -11 256.27 47.6
 7 -2 -11 290.17 99.69
 -7 -2 11 347.77 85.69
 -7 -2 11 308.27 76.79
 8 3 -4 355.86 56.19
 -8 3 4 440.36 84.89
 8 3 -4 264.17 58.59
 -8 -3 4 564.04 96.99
 8 -3 -4 246.08 98.99
 8 -3 -4 346.77 57.39
 -7 3 3 37.6 30.1
 7 3 -3 41.5 19.7
 -7 -3 3 40.6 39.3
 7 -3 -3 37.2 62.09
 7 -3 -3 -3.5 18.2
 7 -3 -3 0.4 9
 7 -3 -3 13.2 52.49
 -6 3 2 83.59 35.6
 6 3 -2 131.79 27.8
 6 3 -2 172.78 35.5
 6 -3 -2 101.39 22.7
 6 -3 -2 109.79 32.3
 -6 -3 2 119.09 50.49
 6 -3 -2 64.29 56.39
 -6 -3 2 109.79 20.8
 5 3 -1 6.5 10.5
 5 3 -1 -1.4 11.4
 -5 3 1 9.2 25.3
 -5 -3 1 25.4 7.1
 -5 -3 1 -15.6 40.2
 5 -3 -1 16.6 17.6
 5 -3 -1 -1.9 6.6
 4 3 0 1175.18 162.08
 -4 3 0 1400.06 167.38
 4 3 0 1194.18 159.38
 4 -3 0 1296.07 157.88
 4 -3 0 1008 172.78
 4 -3 0 1094.59 165.08
 -4 -3 0 1227.98 157.68
 -4 -3 0 1233.48 178.98
 -3 3 -1 441.36 60.99
 3 3 1 547.95 62.39
 3 -3 1 368.66 76.29
 -3 -3 -1 395.06 59.29
 3 -3 1 398.06 58.39
 -3 -3 -1 763.02 101.09
 -2 3 -2 3889.31 465.45
 2 3 2 3130.79 464.05
 -2 3 -2 3677.93 464.65
 -2 -3 -2 3633.24 463.95
 2 -3 2 3554.84 466.65
 -2 -3 -2 3891.01 466.95
 0 3 4 840.12 112.29
 0 -3 -4 937.41 109.09
 0 -3 4 727.83 114.19
 0 -3 -4 655.03 115.39
 1 3 -5 674.73 104.59
 -1 3 5 799.92 105.89
 -1 3 5 625.24 102.29
 1 -3 -5 737.13 101.29
 -1 -3 5 743.73 108.19
 1 -3 -5 693.33 108.09
 1 -3 -5 863.81 100.99
 -1 -3 5 778.82 105.69
 -2 3 6 1829.62 224.38
 -2 -3 6 1600.64 216.78
 3 3 -7 258.07 75.49
 -3 3 7 365.46 56.49
 -3 3 7 398.36 75.69
 -3 3 7 363.56 62.59
 3 -3 -7 313.07 63.59
 -3 -3 7 414.86 49.7
 3 -3 -7 377.66 49.2
 3 -3 -7 329.57 66.09
 -3 -3 7 372.76 71.89
 4 3 -8 1215.48 200.88
 -4 3 8 1377.36 181.78
 -4 3 8 1481.45 187.88
 4 3 -8 1272.67 173.78
 -4 -3 8 1388.06 195.48
 4 -3 -8 1247.08 195.68
 -4 -3 8 1463.05 180.18
 -4 -3 8 1370.66 172.18
 4 -3 -8 1358.46 172.28
 4 -3 -8 1105.89 183.18
 5 3 -9 123.29 62.79
 5 3 -9 115.09 25.7
 -5 3 9 157.68 36.9
 -5 3 9 126.69 41.3
 5 -3 -9 161.98 57.49
 -5 -3 9 145.19 52.79
 -5 -3 9 147.69 36.9
 5 -3 -9 148.79 23.9
 -5 -3 9 165.88 23.2
 5 -3 -9 105.19 35.6
 -6 3 10 110.79 36
 -6 3 10 192.68 51.19
 6 3 -10 80.49 65.39
 -6 -3 10 141.59 40.1
 6 -3 -10 95.09 32.5
 6 -3 -10 116.49 59.89
 6 -3 -10 112.89 23.8
 -6 -3 10 197.78 60.19
 -7 3 11 -25.5 38.5
 -7 3 11 52.59 72.09
 -7 3 11 -22.2 29.4
 7 3 -11 -12.9 66.09
 -7 -3 11 -24.6 44.5
 -7 -3 11 -36.8 23.4
 7 -3 -11 -55.49 64.89
 7 -3 -11 -7.1 9.1
 7 -3 -11 -9.4 13.2
 8 4 -4 -6.8 24.9
 -8 4 4 37.2 32.8
 -8 4 4 24.2 17.9
 8 4 -4 33.3 13.1
 -8 -4 4 39.2 44.3
 8 -4 -4 -58.59 51.39
 8 -4 -4 -34.4 58.59
 8 -4 -4 16.1 15.8
 7 4 -3 29.7 15.3
 -7 4 3 -3 28
 7 -4 -3 -42.1 57.49
 -7 -4 3 90.69 46.4
 7 -4 -3 20.3 11.1
 7 -4 -3 77.69 61.99
 7 -4 -3 -2.4 21
 6 4 -2 827.02 103.69
 6 4 -2 606.24 98.49
 -6 4 2 742.43 110.49
 6 -4 -2 726.83 105.59
 -6 -4 2 662.13 127.09
 6 -4 -2 530.85 127.99
 6 -4 -2 708.23 96.19
 -6 -4 2 713.53 95.19
 -5 4 1 364.96 61.89
 5 4 -1 271.57 47
 5 4 -1 276.27 48
 -5 -4 1 306.97 75.69
 5 -4 -1 411.86 84.69
 -5 -4 1 255.47 41.4
 5 -4 -1 277.17 55.99
 5 -4 -1 306.27 42.5
 4 4 0 705.23 95.19
 4 4 0 650.63 92.89
 -4 -4 0 689.63 90.69
 4 -4 0 646.84 108.29
 4 -4 0 682.83 90.19
 -4 -4 0 685.13 120.79
 3 4 1 351.96 53.39
 3 4 1 309.07 54.49
 -3 4 -1 395.96 51.79
 3 -4 1 316.27 61.79
 -3 -4 -1 473.65 94.69
 -3 -4 -1 382.66 50.79
 3 -4 1 466.95 67.29
 3 -4 1 350.76 49.4
 -2 4 -2 9.1 6.7
 2 4 2 5 7.4
 2 4 2 -5.2 10.2
 -2 4 -2 -2.2 3.6
 2 -4 2 -2.3 12.7
 -2 -4 -2 -0.4 4.8
 2 -4 2 -6.3 8.1
 -2 -4 -2 5.5 5.3
 -1 4 -3 265.67 50.99
 1 4 3 334.07 50.49
 1 4 3 372.56 48.2
 1 -4 3 322.17 46.6
 1 -4 3 359.46 44.9
 0 4 -4 1290.87 203.58
 0 4 4 1764.22 204.18
 0 -4 4 1528.75 206.48
 0 -4 4 1638.44 207.08
 0 -4 -4 1545.15 204.28
 -1 4 5 4323.87 520.45
 1 4 -5 3690.93 530.35
 -1 4 5 3785.92 523.55
 -1 -4 5 4594.54 527.45
 1 -4 -5 4116.89 520.95
 1 -4 -5 4186.48 526.25
 1 -4 -5 3654.23 523.35
 -2 4 6 1820.92 249.38
 -2 4 6 2039.3 239.48
 2 4 -6 1385.16 249.88
 -2 4 6 1946.31 241.28
 -2 -4 6 1895.51 252.57
 2 -4 -6 1528.95 244.78
 2 -4 -6 2034.7 245.28
 -2 -4 6 1869.51 234.88
 -3 4 7 2 10.6
 -3 4 7 2.1 15.8
 -3 4 7 -1.9 15.9
 3 4 -7 1 27.8
 3 -4 -7 28.4 21.1
 -3 -4 7 36.8 32.5
 -3 -4 7 12.3 4.9
 3 -4 -7 5.8 18.2
 -4 4 8 18.5 27.9
 -4 4 8 19.7 26.6
 -4 4 8 19.7 16.2
 4 4 -8 -60.19 36
 -4 -4 8 15.6 6.7
 -4 -4 8 12.6 15.1
 4 -4 -8 28.6 26.5
 4 -4 -8 3.5 4.7
 -4 -4 8 60.29 41.4
 4 -4 -8 -7.9 31
 -5 4 9 24.7 23.8
 -5 4 9 61.79 38.2
 5 4 -9 103.89 57.39
 -5 4 9 58.89 34.1
 -5 -4 9 49.5 11.8
 -5 -4 9 25.5 21.7
 5 -4 -9 79.39 49.6
 5 -4 -9 49.9 12
 -5 -4 9 50.29 44.6
 5 -4 -9 40 26.5
 6 4 -10 430.96 119.69
 -6 4 10 545.75 94.59
 -6 4 10 634.94 121.09
 -6 4 10 573.94 99.39
 -6 -4 10 636.54 95.29
 -6 -4 10 564.34 113.89
 6 -4 -10 477.15 89.29
 6 -4 -10 573.64 76.39
 6 -4 -10 523.55 121.59
 -7 4 11 65.09 44.7
 7 4 -11 67.09 71.59
 -7 4 11 47 49.2
 -7 4 11 108.69 53.09
 -7 -4 11 53.39 38.7
 7 -4 -11 -38.2 105.09
 7 -4 -11 67.39 26.7
 -7 -4 11 56.99 51.09
 7 -4 -11 99.29 20.8
 -7 5 3 255.67 55.79
 7 5 -3 212.88 39.6
 7 -5 -3 9.8 70.19
 7 -5 -3 174.18 35.3
 -7 -5 3 235.68 33.9
 -7 -5 3 501.85 92.79
 7 -5 -3 243.08 82.89
 7 -5 -3 167.38 44.7
 -6 5 2 11.2 24.7
 6 5 -2 2.1 11.4
 6 -5 -2 8.1 7.6
 6 -5 -2 3.9 46.7
 6 -5 -2 -11.4 13.9
 -6 -5 2 -4.6 5.3
 -6 -5 2 50.39 47.7
 5 5 -1 15.3 13.6
 -5 5 1 5.4 22.9
 5 5 -1 8.9 11.6
 5 -5 -1 -3.7 36
 -5 -5 1 27.1 11.6
 5 -5 -1 18.7 22.2
 -5 -5 1 14.5 42.6
 4 5 0 129.19 30.6
 -4 5 0 138.69 36.7
 4 5 0 121.79 29.8
 4 -5 0 190.18 40
 -4 -5 0 136.99 23.3
 4 -5 0 164.88 43.5
 4 -5 0 129.39 21.8
 -4 -5 0 138.39 55.49
 3 5 1 3156.68 366.56
 -3 5 -1 3103.39 363.36
 -3 5 -1 2782.62 363.86
 3 -5 1 2698.43 367.76
 -3 -5 -1 2702.03 362.06
 3 -5 1 2638.54 368.16
 -3 -5 -1 2411.66 379.46
 -2 5 -2 13.6 9.2
 -2 5 -2 25.3 6.9
 2 5 2 -1.6 10.5
 2 -5 2 36.1 20.9
 -2 -5 -2 18.7 8.2
 1 5 3 148.99 34.5
 -1 -5 -3 199.38 33
 1 -5 3 181.68 27.2
 -1 -5 -3 181.18 30.2
 0 5 4 74.39 17
 0 5 4 28.8 14.9
 0 -5 -4 58.79 18.3
 0 -5 -4 44.8 15
 0 -5 4 44.7 16.6
 -1 5 5 0.7 20.4
 -1 5 5 48 16.7
 -1 5 5 24 20.1
 1 -5 -5 40.4 16.9
 -1 -5 5 32.8 55.59
 1 -5 -5 22 18.1
 2 5 -6 -46 36.7
 -2 5 6 16.4 12.2
 -2 -5 6 -1 11.4
 -2 -5 6 -36.1 36.7
 -3 5 7 721.33 115.39
 3 5 -7 619.54 118.49
 -3 5 7 824.82 102.99
 -3 5 7 766.92 104.19
 3 -5 -7 576.84 110.09
 -3 -5 7 747.73 119.09
 -3 -5 7 731.03 95.29
 3 -5 -7 779.52 110.39
 -4 5 8 6.2 25.2
 4 5 -8 -9.5 47.5
 -4 5 8 -14.1 12.9
 -4 5 8 -6.2 24.3
 4 -5 -8 57.09 28.5
 4 -5 -8 -9.8 30.8
 -4 -5 8 -2.1 5.2
 -4 -5 8 -5.1 41.1
 -4 -5 8 6.6 13.6
 4 -5 -8 2.4 4.5
 -5 5 9 214.88 52.69
 -5 5 9 200.88 50.89
 5 5 -9 205.98 77.19
 -5 5 9 197.88 59.49
 -5 -5 9 236.18 30.7
 5 -5 -9 122.39 44
 -5 -5 9 213.18 66.89
 5 -5 -9 201.48 30.6
 -5 -5 9 227.18 48
 5 -5 -9 188.08 63.49
 -6 5 10 -14.1 26.9
 6 5 -10 -21 54.39
 -6 5 10 39.9 38.8
 -6 5 10 25.2 27.3
 6 -5 -10 15 46.7
 -6 -5 10 3.3 5.8
 6 -5 -10 -4.6 6.7
 -6 -5 10 9.9 22.4
 6 -5 -10 2.7 22.6
 -6 -5 10 59.49 49.9
 -7 5 11 21.2 43
 -7 5 11 -35.2 30
 7 5 -11 7.3 72.29
 -7 5 11 3.3 27.7
 7 -5 -11 5 21.1
 7 -5 -11 30.5 80.69
 -7 -5 11 -8.6 32.8
 -7 -5 11 30.3 45.4
 7 -5 -11 9.9 10.7
 -7 6 3 29.1 15.7
 7 6 -3 60.09 21.2
 -7 6 3 78.39 34.4
 7 -6 -3 54.29 64.49
 7 -6 -3 72.29 17.8
 7 -6 -3 5.4 53.59
 -7 -6 3 56.59 47.8
 -7 -6 3 43.5 12.6
 7 -6 -3 56.59 26.1
 -6 6 2 203.98 52.49
 6 6 -2 212.28 42.2
 6 -6 -2 229.98 48.1
 6 -6 -2 241.88 35.3
 -6 -6 2 183.58 68.49
 6 -6 -2 182.38 67.59
 -6 -6 2 207.58 34
 -5 6 1 486.35 76.99
 5 6 -1 509.05 73.99
 5 6 -1 540.25 71.79
 -5 -6 1 463.55 67.09
 5 -6 -1 424.56 66.29
 5 -6 -1 491.65 79.29
 -5 -6 1 512.25 108.59
 5 -6 -1 538.65 98.39
 -4 6 0 546.05 88.39
 4 6 0 648.84 89.59
 -4 6 0 638.14 85.19
 4 6 0 686.63 86.89
 -4 -6 0 618.64 83.59
 4 -6 0 630.24 93.59
 -4 -6 0 435.56 118.69
 4 -6 0 505.15 98.29
 4 -6 0 634.84 82.49
 -3 6 -1 306.17 42.4
 3 6 1 343.57 49
 3 6 1 264.37 43.7
 -3 -6 -1 298.77 42.8
 3 -6 1 293.67 52.29
 3 -6 1 274.47 49.6
 -3 -6 -1 282.87 76.09
 -3 -6 -1 282.27 45.7
 2 6 2 413.06 63.19
 -2 -6 -2 456.35 61.49
 -2 -6 -2 438.36 61.99
 2 -6 2 428.06 73.49
 -1 6 -3 13.7 10.5
 1 6 3 4.8 12
 1 6 3 5.6 5.5
 -1 -6 -3 10.6 9.7
 1 -6 3 9 5.7
 -1 -6 -3 3.5 6.4
 0 6 4 923.31 114.19
 0 -6 -4 785.32 118.89
 0 -6 -4 880.31 118.99
 0 -6 4 806.62 119.19
 -1 6 5 2050.59 293.97
 1 -6 -5 2183.08 298.27
 1 -6 -5 2039.4 297.57
 1 -6 -5 2578.44 292.87
 -1 -6 5 2361.36 303.57
 -2 6 6 2585.84 381.46
 -2 6 6 2635.74 374.46
 -2 6 6 2993.6 373.76
 -2 -6 6 2777.82 390.86
 2 -6 -6 2927.31 385.26
 2 -6 -6 3344.47 379.26
 3 6 -7 397.36 101.09
 -3 6 7 541.75 81.39
 -3 6 7 554.54 95.09
 -3 6 7 523.55 80.69
 3 -6 -7 446.86 93.69
 -3 -6 7 612.74 73.49
 3 -6 -7 595.14 89.99
 -3 -6 7 584.34 103.89
 4 6 -8 82.59 55.99
 -4 6 8 50.19 30.3
 -4 6 8 -4.2 14.9
 -4 6 8 48.5 26.8
 4 -6 -8 -10.2 33.1
 -4 -6 8 -1.6 5.5
 -4 -6 8 3.8 46.9
 4 -6 -8 -17.1 28.1
 -4 -6 8 1.7 13.7
 -5 6 9 157.08 46.6
 5 6 -9 117.29 63.89
 -5 6 9 177.18 53.59
 -5 6 9 169.98 43
 -5 -6 9 170.18 26.9
 5 -6 -9 170.48 26.6
 5 -6 -9 136.69 46.7
 -5 -6 9 195.38 64.89
 -5 -6 9 189.18 41.4
 5 -6 -9 183.88 59.49
 -6 6 10 273.67 77.09
 -6 6 10 289.27 70.99
 -6 6 10 327.47 72.39
 6 6 -10 165.78 83.39
 -6 -6 10 441.66 72.09
 6 -6 -10 346.07 91.19
 -6 -6 10 365.66 49.1
 -6 -6 10 485.85 100.49
 6 -6 -10 357.06 49.8
 6 -6 -10 289.97 75.49
 -7 6 11 225.88 63.79
 -7 6 11 244.98 63.89
 -7 6 11 254.67 78.39
 -7 -6 11 222.18 77.09
 -7 -6 11 204.58 58.19
 7 -6 -11 379.56 99.79
 7 -6 -11 238.28 39.2
 7 -6 -11 216.28 61.29
 7 7 -3 17.1 17.6
 -7 7 3 74.39 34.9
 -7 7 3 38.3 15.8
 7 -7 -3 8.1 54.79
 -7 -7 3 76.19 64.49
 -7 -7 3 47.5 14.1
 7 -7 -3 -19.3 60.09
 7 -7 -3 41.6 13.8
 -6 7 2 110.09 33.8
 6 7 -2 82.79 26.1
 6 -7 -2 120.09 33.2
 6 -7 -2 49.9 64.29
 -6 -7 2 122.09 65.69
 -6 -7 2 103.89 20.4
 6 -7 -2 50.69 48.6
 6 -7 -2 85.99 19.6
 -5 7 1 -18.8 18.6
 5 7 -1 3.4 14.7
 -5 -7 1 -4.1 6.3
 5 -7 -1 -29.9 29.9
 -5 -7 1 11.2 53.09
 5 -7 -1 28.9 20.1
 5 -7 -1 8.5 6.8
 4 7 0 1594.24 213.58
 -4 7 0 1618.84 210.68
 -4 7 0 1707.53 208.38
 4 7 0 1498.05 207.38
 4 -7 0 1487.65 217.48
 4 -7 0 1604.94 215.38
 -4 -7 0 1709.53 207.48
 -4 -7 0 1299.07 234.78
 -3 7 -1 28.5 13
 3 7 1 22.9 9.7
 3 7 1 21.8 13.4
 -3 7 -1 45.1 10.5
 3 -7 1 45.2 17.8
 -3 -7 -1 22.5 9.7
 -3 -7 -1 26.1 35.6
 -3 -7 -1 15.2 8.5
 3 -7 1 35.6 17.9
 -2 7 -2 622.44 94.39
 2 7 2 642.04 94.89
 2 7 2 760.22 107.99
 2 -7 2 924.91 107.09
 -2 -7 -2 760.52 97.59
 2 -7 2 714.43 97.89
 1 7 3 102.39 22.1
 -1 7 -3 122.59 26.8
 -1 -7 -3 141.99 26.8
 -1 -7 -3 219.38 36.7
 0 7 4 418.96 57.79
 0 7 4 349.57 75.09
 0 -7 4 502.65 67.69
 0 -7 -4 347.07 64.39
 0 -7 -4 426.26 69.59
 -1 7 5 18.7 16.5
 -1 7 5 26.6 13.6
 -1 7 5 -11.2 28.3
 1 -7 -5 23.9 19.8
 1 -7 -5 13.5 25.4
 -1 -7 5 97.79 49.6
 -1 -7 5 32.9 40.7
 1 -7 -5 -3.6 25.3
 -2 7 6 711.43 108.89
 -2 7 6 730.83 103.19
 -2 7 6 746.13 100.89
 -2 -7 6 712.03 125.69
 2 -7 -6 629.14 118.09
 2 -7 -6 819.32 107.89
 -3 7 7 381.26 53.69
 -3 7 7 259.17 50.99
 -3 7 7 291.87 59.69
 3 -7 -7 265.97 60.79
 -3 -7 7 299.27 42
 -3 -7 7 193.98 70.19
 3 -7 -7 218.18 73.69
 -4 7 8 824.22 125.99
 -4 7 8 830.62 146.39
 -4 7 8 824.12 127.39
 -4 -7 8 1003.3 157.58
 4 -7 -8 742.93 137.09
 -4 -7 8 1053.49 123.19
 -4 -7 8 900.41 115.49
 4 -7 -8 723.73 140.79
 -5 7 9 36.7 25.1
 -5 7 9 85.19 36.3
 -5 7 9 61.99 41.2
 5 -7 -9 47 36.3
 5 -7 -9 66.99 14.1
 -5 -7 9 76.99 16.3
 5 -7 -9 113.49 48.5
 -5 -7 9 50.49 59.79
 -5 -7 9 52.19 23.2
 -6 7 10 65.19 33.2
 -6 7 10 138.89 45.9
 -6 7 10 140.59 54.19
 6 -7 -10 98.99 38.8
 -6 -7 10 83.19 56.19
 6 -7 -10 116.19 22.3
 6 -7 -10 152.98 67.19
 -6 -7 10 174.08 48.2
 -6 -7 10 123.49 21.7
 -7 7 11 -36.9 43.4
 -7 7 11 6.1 35.9
 -7 7 11 -14.1 26.4
 7 -7 -11 8.3 26.8
 -7 -7 11 8.6 26.6
 7 -7 -11 0.9 8.3
 7 -7 -11 -60.79 54.89
 -7 -7 11 58.89 52.19
 7 8 -3 62.89 22.4
 -7 8 3 36.1 16.9
 -7 8 3 45 30.8
 7 -8 -3 -105.59 60.49
 -7 -8 3 84.49 61.89
 7 -8 -3 49.8 24
 -7 -8 3 31.7 13.6
 7 -8 -3 51.89 30.3
 7 -8 -3 12 57.09
 6 8 -2 66.19 25.1
 -6 8 2 108.79 22.4
 -6 8 2 49 27
 6 -8 -2 60.69 25.5
 6 -8 -2 50.39 14.8
 -6 -8 2 54.19 58.39
 6 -8 -2 -58.39 58.19
 6 -8 -2 28.7 45.4
 -6 -8 2 51.89 15.1
 -5 8 1 1362.46 169.28
 5 8 -1 1206.48 174.78
 -5 8 1 1290.47 172.28
 5 -8 -1 1235.08 165.78
 -5 -8 1 1119.59 204.08
 5 -8 -1 1090.69 184.08
 5 -8 -1 1451.75 178.08
 -5 -8 1 1247.98 166.78
 -4 8 0 168.58 44.2
 -4 8 0 270.77 38
 4 8 0 219.98 53.09
 4 8 0 325.57 40.2
 -4 -8 0 319.57 85.39
 -4 -8 0 198.38 38.5
 4 -8 0 256.57 51.49
 4 -8 0 228.78 57.29
 -3 8 -1 10.5 6
 3 8 1 2.8 14.8
 3 8 1 6.7 8.7
 3 -8 1 41 19.4
 3 -8 1 18.4 17.8
 -3 -8 -1 10.2 8.8
 -3 -8 -1 12 7.5
 2 8 2 -11.9 16.9
 -2 -8 -2 -6.8 10.8
 2 -8 2 11.3 17.3
 2 -8 2 24.3 13.8
 -2 -8 -2 -0.8 4.9
 1 8 3 488.75 95.49
 -1 -8 -3 592.84 78.99
 0 8 4 647.34 99.59
 0 -8 -4 854.61 117.19
 0 -8 4 868.61 110.79
 -1 8 5 1515.15 184.68
 -1 8 5 1431.16 180.78
 1 -8 -5 1044.5 194.48
 -1 -8 5 1353.86 205.78
 1 -8 -5 1401.76 184.48
 1 -8 -5 1508.05 203.78
 -2 8 6 1310.07 161.48
 -2 8 6 995.2 164.48
 -2 -8 6 1330.47 184.58
 2 -8 -6 1117.89 175.28
 2 -8 -6 1281.57 164.78
 -3 8 7 99.89 34.2
 -3 8 7 100.09 35
 -3 8 7 150.98 36.5
 3 -8 -7 251.87 74.59
 3 -8 -7 129.39 41.8
 -3 -8 7 134.19 25.1
 -3 -8 7 142.59 61.89
 -4 8 8 -22.4 21.5
 -4 8 8 2.5 17.4
 -4 8 8 -24.7 26.8
 -4 -8 8 13.7 47.3
 4 -8 -8 -38.7 30.5
 -4 -8 8 18.1 8
 4 -8 -8 -29 27.2
 -4 -8 8 13.2 16.3
 -5 8 9 50.19 31.4
 -5 8 9 142.09 52.99
 -5 8 9 98.39 34.8
 5 -8 -9 136.59 19.7
 -5 -8 9 81.99 18.4
 5 -8 -9 67.29 41.3
 -5 -8 9 126.69 33.4
 -5 -8 9 76.19 59.79
 5 -8 -9 40.2 44.4
 -6 8 10 120.69 40.8
 -6 8 10 52.79 32.4
 -6 8 10 171.78 57.59
 6 -8 -10 49.9 55.19
 -6 -8 10 96.99 20.7
 -6 -8 10 148.09 66.99
 -6 -8 10 119.39 41.5
 6 -8 -10 106.49 21
 6 -8 -10 105.19 42.9
 -7 8 11 264.67 71.39
 -7 8 11 167.18 76.49
 -7 8 11 162.48 60.19
 -7 -8 11 242.68 64.39
 7 -8 -11 281.37 43.1
 -7 -8 11 285.17 41.8
 -7 -8 11 495.75 115.29
 7 -8 -11 267.87 74.69
 7 -8 -11 436.06 106.49
 -7 9 3 178.48 47.3
 7 9 -3 198.88 45.7
 -7 9 3 233.58 41.9
 7 -9 -3 226.48 80.69
 -7 -9 3 334.47 57.39
 7 -9 -3 230.88 36.8
 -7 -9 3 197.88 35.3
 -7 -9 3 169.68 114.39
 7 -9 -3 10.4 72.59
 7 -9 -3 264.77 59.49
 -6 9 2 21.1 11.6
 -6 9 2 -0.4 21.6
 6 9 -2 27.6 24.7
 6 -9 -2 29.3 66.39
 6 -9 -2 -17.4 59.69
 6 -9 -2 8.2 19
 -6 -9 2 4.6 8.5
 6 -9 -2 21.4 9.1
 -6 -9 2 18.8 55.89
 -5 9 1 11.7 20.3
 -5 9 1 34.6 11.6
 5 9 -1 3.7 20.9
 5 -9 -1 -19 75.09
 5 -9 -1 -8.3 34.3
 5 -9 -1 15.7 8.5
 -5 -9 1 29.5 53.99
 -5 -9 1 19.7 11.5
 5 -9 -1 27.8 24
 -4 9 0 104.79 19.6
 4 9 0 79.99 29.9
 -4 9 0 78.09 25.6
 -4 -9 0 137.19 28.2
 4 -9 0 71.19 30.1
 -4 -9 0 124.69 24.6
 4 -9 0 117.79 39.4
 3 9 1 600.44 114.49
 -3 9 -1 775.12 102.79
 3 9 1 825.02 101.69
 3 -9 1 725.63 111.09
 3 -9 1 794.02 113.29
 -3 -9 -1 743.33 105.89
 -3 -9 -1 930.41 109.49
 2 9 2 337.87 75.89
 2 -9 2 417.56 70.69
 -2 -9 -2 535.85 67.39
 2 -9 2 470.75 66.19
 -2 -9 -2 491.35 70.29
 -1 -9 -3 794.82 106.49
 1 -9 3 787.72 111.79
 -1 -9 -3 727.13 113.89
 0 -9 4 477.25 118.29
 0 -9 4 529.45 84.99
 -1 9 5 21.7 9.8
 -1 9 5 9.7 9.2
 -1 -9 5 -51.19 29.3
 1 -9 -5 133.29 30.6
 1 -9 -5 -6.3 26.3
 -1 -9 5 15.1 41.8
 -2 9 6 93.59 22.1
 -2 9 6 48.7 40.7
 -2 9 6 60.79 25.6
 2 -9 -6 20.6 29
 2 -9 -6 74.79 26.3
 -2 -9 6 107.89 53.19
 -2 -9 6 55.19 23.7
 -3 9 7 724.83 117.59
 -3 9 7 836.72 118.99
 -3 9 7 622.64 121.49
 3 -9 -7 773.12 141.59
 3 -9 -7 875.71 127.89
 -3 -9 7 788.72 111.89
 -3 -9 7 972.9 111.09
 -3 -9 7 887.61 156.88
 -4 9 8 725.03 152.48
 -4 9 8 922.91 139.29
 -4 9 8 777.42 159.98
 -4 -9 8 945.61 177.48
 4 -9 -8 1108.49 154.68
 -4 -9 8 1215.18 137.19
 -4 -9 8 959 130.89
 4 -9 -8 1029.8 162.78
 -5 9 9 422.06 83.29
 -5 9 9 382.86 103.69
 -5 9 9 441.16 82.69
 -5 -9 9 469.95 123.49
 5 -9 -9 554.54 102.49
 -5 -9 9 501.65 66.59
 5 -9 -9 526.15 65.69
 5 -9 -9 305.37 98.19
 -5 -9 9 510.85 78.89
 -6 9 10 30.2 28.9
 -6 9 10 46.5 33.8
 -6 9 10 56.89 46.6
 6 -9 -10 14.2 32.8
 -6 -9 10 29.2 10.8
 -6 -9 10 36.2 31.2
 6 -9 -10 41.9 12
 6 -9 -10 32.8 57.59
 -6 -9 10 123.89 67.39
 -7 9 11 2.4 32.8
 -7 9 11 64.79 51.69
 7 -9 -11 41 16.7
 7 -9 -11 -37 57.09
 7 -9 -11 17.3 31.1
 -7 -9 11 8.2 34.1
 -7 -9 11 9.6 10.8
 -7 10 3 -7.7 10.3
 7 10 -3 -9.3 14.6
 -7 10 3 35.8 24.4
 7 -10 -3 9.2 53.19
 7 -10 -3 -60.49 59.29
 -7 -10 3 115.79 67.89
 7 -10 -3 -3 7
 -7 -10 3 -8.5 15.1
 -7 -10 3 7.4 8.6
 7 -10 -3 -19.3 16.8
 -6 10 2 587.54 95.29
 6 10 -2 491.85 97.49
 -6 10 2 655.33 87.39
 6 -10 -2 632.84 97.59
 6 -10 -2 557.14 117.39
 -6 -10 2 523.25 139.29
 -6 -10 2 618.84 85.19
 6 -10 -2 620.64 84.09
 -6 -10 2 711.53 99.59
 -5 10 1 7 21.2
 5 10 -1 6.4 23.3
 -5 10 1 10.7 8.2
 -5 -10 1 3.5 10
 5 -10 -1 38.7 33.2
 -5 -10 1 12.9 10
 -5 -10 1 57.29 61.29
 5 -10 -1 -36.1 60.59
 5 -10 -1 -1.7 19.8
 4 10 0 570.54 108.29
 -4 10 0 725.33 91.79
 -4 -10 0 446.66 136.69
 4 -10 0 594.94 104.99
 4 -10 0 676.63 103.09
 -4 -10 0 739.53 99.39
 -4 -10 0 774.02 96.19
 3 10 1 34.1 26.8
 -3 -10 -1 21.7 13.3
 3 -10 1 3.1 15.8
 3 -10 1 3.9 20.4
 -3 -10 -1 1.3 5.5
 2 10 2 443.16 93.79
 2 -10 2 521.25 84.69
 2 -10 2 616.64 81.39
 -2 -10 -2 556.94 84.79
 -2 -10 -2 675.63 82.49
 1 10 3 64.59 29.7
 1 10 3 67.49 12.4
 -1 -10 -3 53.59 16
 -1 -10 -3 41.8 19.4
 1 -10 3 49 22.2
 1 -10 3 310.77 83.59
 0 10 4 463.45 64.39
 0 10 4 532.25 65.29
 0 -10 4 454.95 73.39
 0 -10 -4 414.46 73.19
 0 -10 -4 406.66 81.39
 -1 10 5 17.9 26
 -1 10 5 22.2 10.6
 -1 10 5 16.2 9.6
 -1 -10 5 0.5 22.8
 1 -10 -5 27.8 24.2
 1 -10 -5 24.4 15.8
 -1 -10 5 26.9 41.5
 1 -10 -5 -10.8 20
 -2 10 6 972.9 198.28
 -2 10 6 1280.17 178.48
 -2 10 6 1585.84 177.08
 -2 -10 6 1342.77 205.38
 2 -10 -6 1513.25 180.68
 -2 -10 6 1064.39 179.58
 2 -10 -6 1352.56 198.88
 -3 10 7 -14.7 15.6
 -3 10 7 -5.5 23.8
 -3 -10 7 -3.2 54.79
 -3 -10 7 -3.6 10.7
 -3 -10 7 -8.8 12.2
 3 -10 -7 -29.5 34.8
 3 -10 -7 29.1 31.7
 -4 10 8 -26.3 21
 -4 10 8 13.3 31.3
 -4 10 8 -10.3 17.8
 -4 -10 8 2.7 52.79
 -4 -10 8 2.2 9
 -4 -10 8 12.3 14.5
 4 -10 -8 4.8 37.4
 4 -10 -8 -7.8 29
 -5 10 9 20 24.4
 -5 10 9 26.7 33.1
 -5 10 9 -2.9 25.6
 5 -10 -9 -1.9 35.3
 -5 -10 9 4.5 8.6
 -5 -10 9 8 18.5
 -5 -10 9 -35.7 46.9
 5 -10 -9 -3.1 36.1
 -6 10 10 354.96 86.29
 -6 10 10 384.96 75.29
 -6 10 10 341.37 80.29
 -6 -10 10 417.66 77.69
 -6 -10 10 389.06 54.39
 6 -10 -10 384.66 53.69
 -6 -10 10 533.65 132.09
 6 -10 -10 253.57 75.79
 6 -10 -10 421.36 98.69
 -7 -10 11 5.5 9.2
 7 -10 -11 2.9 8.9
 -7 11 3 218.48 48.2
 7 11 -3 69.59 24.9
 7 -11 -3 126.09 48.2
 7 -11 -3 133.89 25.3
 -7 -11 3 185.98 28.4
 7 -11 -3 112.89 72.39
 -7 -11 3 122.99 78.69
 -7 -11 3 103.89 34.5
 7 -11 -3 98.79 67.59
 -6 11 2 32.2 12
 -6 11 2 25.1 23.7
 6 11 -2 -23.1 26.1
 6 -11 -2 27.1 23
 6 -11 -2 45 71.99
 -6 -11 2 19.9 12.5
 6 -11 -2 45.9 12.9
 -6 -11 2 63.19 71.89
 6 -11 -2 22.7 46.8
 -6 -11 2 2.6 13.4
 5 11 -1 28.8 27.2
 -5 11 1 11.1 8.9
 -5 -11 1 18.3 13
 5 -11 -1 33.3 30.8
 -5 -11 1 33.2 12.4
 5 -11 -1 19.7 25
 5 -11 -1 65.09 64.09
 -5 -11 1 -34.9 52.69
 -4 11 0 110.69 20.5
 4 11 0 103.39 36.3
 -4 -11 0 77.89 21.2
 -4 -11 0 59.49 21.1
 4 -11 0 147.09 38.3
 -4 -11 0 167.28 74.69
 3 11 1 369.36 87.19
 3 -11 1 377.46 72.69
 3 -11 1 391.56 72.99
 -3 -11 -1 497.15 67.29
 -3 -11 -1 510.75 67.19
 2 -11 2 957.9 143.79
 -2 -11 -2 1128.29 141.69
 -2 -11 -2 1040.5 145.89
 2 -11 2 1009.9 140.79
 1 11 3 249.18 34.2
 1 11 3 183.08 57.09
 -1 -11 -3 339.27 44.7
 1 -11 3 85.59 64.89
 1 -11 3 212.78 44.5
 -1 -11 -3 297.37 53.99
 0 11 4 193.18 63.69
 0 11 4 373.06 42.8
 0 -11 4 170.28 63.99
 0 -11 -4 306.17 61.79
 0 -11 4 324.17 53.69
 0 -11 -4 255.77 53.49
 0 -11 4 242.78 48.7
 -1 11 5 9.1 35.9
 1 -11 -5 21.9 31.6
 -1 -11 5 4.4 25.6
 -2 11 6 385.86 104.89
 -2 11 6 361.06 57.19
 2 -11 -6 290.37 90.29
 -2 -11 6 460.05 111.99
 -2 -11 6 274.97 68.79
 -3 11 7 330.37 75.59
 -3 11 7 391.86 67.29
 -3 -11 7 439.86 108.19
 3 -11 -7 331.47 89.09
 3 -11 -7 344.87 74.49
 -3 -11 7 397.26 61.29
 -4 11 8 854.01 147.19
 -4 11 8 973 146.29
 -4 -11 8 1008.6 134.99
 4 -11 -8 933.61 154.58
 -4 -11 8 1257.87 139.09
 -4 -11 8 1292.47 192.48
 4 -11 -8 720.33 164.08
 -5 11 9 199.18 58.09
 -5 11 9 258.57 53.99
 -5 11 9 153.98 46
 -5 -11 9 270.77 48.8
 5 -11 -9 185.88 60.39
 5 -11 -9 133.09 59.09
 -5 -11 9 159.68 32.1
 -5 -11 9 269.17 94.79
 -6 11 10 4.6 31.3
 -6 11 10 25.1 39.2
 6 -11 -10 58.49 52.99
 6 -11 -10 42.6 42.3
 -6 -11 10 31.5 12.8
 6 -11 -10 30.2 10.9
 -6 -11 10 14.1 71.09
 -6 -11 10 33.2 29
 -7 12 3 174.38 36.2
 -7 12 3 95.49 44.2
 7 -12 -3 231.18 43.7
 -7 -12 3 229.18 138.89
 7 -12 -3 68.99 125.19
 7 -12 -3 106.59 65.19
 -6 12 2 1.6 8.6
 6 12 -2 -13.9 24.1
 -6 -12 2 -0.8 68.99
 6 -12 -2 -12.7 16.4
 6 -12 -2 8.9 7.9
 6 -12 -2 -109.89 56.69
 6 -12 -2 41.7 47
 -6 -12 2 -4.3 11.5
 -6 -12 2 -2.2 11.1
 -5 12 1 928.71 126.09
 -5 -12 1 948.81 128.29
 5 -12 -1 896.51 136.79
 -5 -12 1 1049.4 137.29
 5 -12 -1 920.31 145.19
 -5 -12 1 843.92 179.78
 4 12 0 -21.4 29.1
 4 -12 0 -25.9 57.89
 -4 -12 0 -30.7 59.39
 -4 -12 0 17.3 11.2
 4 -12 0 15.9 19.8
 4 -12 0 -14.9 25.8
 -4 -12 0 -2 11.3
 3 12 1 144.89 53.19
 3 -12 1 227.98 52.09
 3 -12 1 103.69 81.49
 3 -12 1 219.28 49.2
 -3 -12 -1 245.98 38.9
 2 12 2 10.8 32.2
 2 -12 2 444.06 111.89
 1 12 3 200.18 61.49
 1 12 3 336.17 42.9
 1 -12 3 164.98 81.49
 -1 -12 -3 408.06 69.09
 0 12 4 18.6 32.1
 0 12 4 14.5 13
 0 -12 4 34.2 21.2
 0 -12 -4 35.1 20.5
 0 -12 4 49.9 19.3
 0 -12 4 21.1 46.1
 -1 12 5 1503.45 205.38
 1 -12 -5 1722.73 230.38
 1 -12 -5 1484.65 214.28
 1 -12 -5 1540.35 208.78
 -2 12 6 251.07 50.19
 -2 12 6 285.17 45.1
 -2 -12 6 258.77 66.59
 2 -12 -6 141.29 62.09
 -2 -12 6 292.97 88.09
 2 -12 -6 311.17 57.19
 -3 12 7 94.09 37.3
 -3 12 7 95.59 31.6
 3 -12 -7 113.09 56.49
 3 -12 -7 132.39 43.4
 -3 -12 7 151.58 71.29
 -3 -12 7 124.29 29.6
 -4 12 8 -31.1 25
 -4 12 8 -1.3 22.8
 -4 -12 8 78.79 71.19
 4 -12 -8 20.6 36
 4 -12 -8 19.7 41.3
 -4 -12 8 10 14.6
 -5 12 9 119.59 38.3
 -5 12 9 143.79 46.2
 5 -12 -9 109.79 52.49
 -5 -12 9 121.99 27.2
 -5 -12 9 179.88 37.1
 -5 -12 9 125.49 81.89
 5 -12 -9 116.69 55.69
 -6 12 10 25.4 28.9
 -6 12 10 63.19 35.3
 -6 12 10 74.89 52.29
 -6 -12 10 11.3 70.49
 6 -12 -10 85.29 55.19
 -6 -12 10 35.7 30.4
 6 -12 -10 44 13.5
 -6 -12 10 36.6 14.2
 6 -12 -10 13.1 37.9
 6 13 -2 -6.2 26.7
 -6 13 2 60.39 29.3
 -6 13 2 40.6 13.8
 6 -13 -2 91.59 57.19
 -6 -13 2 17.1 15.7
 -6 -13 2 46.3 21.1
 6 -13 -2 22 64.69
 -5 13 1 6.1 17.3
 5 13 -1 9 29.5
 5 -13 -1 5.6 19
 -5 -13 1 29.4 68.79
 -5 -13 1 -0.3 10.8
 5 -13 -1 -6.8 29.9
 5 -13 -1 -5.2 60.69
 -5 -13 1 -1.5 11.8
 4 -13 0 569.34 96.49
 -4 -13 0 630.44 86.29
 -4 -13 0 498.95 135.09
 4 -13 0 550.14 91.49
 -4 -13 0 503.45 81.39
 3 13 1 165.58 59.69
 -3 -13 -1 249.58 51.09
 3 -13 1 234.88 48.4
 3 -13 1 110.39 83.89
 -3 -13 -1 245.08 41.4
 3 -13 1 201.28 52.69
 2 -13 2 1011.4 154.48
 -2 -13 -2 1109.49 158.88
 2 -13 2 1133.19 153.68
 -2 -13 -2 1222.78 154.08
 -1 -13 -3 322.17 71.99
 1 -13 3 313.97 55.29
 1 -13 3 132.69 77.69
 -1 -13 -3 421.46 58.19
 0 13 4 21.1 41.6
 0 -13 4 109.59 27
 0 -13 4 114.29 28.6
 0 -13 -4 71.79 39.8
 0 -13 -4 85.59 31.7
 0 -13 4 5 43
 -1 13 5 10.2 49.4
 -1 13 5 15.6 13.8
 1 -13 -5 -31.6 21.7
 1 -13 -5 -3 23.1
 -1 -13 5 -46.3 32.6
 1 -13 -5 8.5 36.7
 -2 13 6 359.86 75.39
 -2 13 6 582.84 78.39
 2 -13 -6 474.15 81.59
 2 -13 -6 670.63 118.89
 -2 -13 6 321.47 108.49
 -3 13 7 297.47 66.49
 -3 13 7 322.17 68.49
 -3 -13 7 389.16 68.39
 -3 -13 7 475.75 57.19
 3 -13 -7 372.76 77.29
 -3 -13 7 589.74 131.89
 3 -13 -7 316.87 103.29
 -4 13 8 525.95 98.79
 -4 13 8 491.35 100.39
 -4 -13 8 703.93 87.29
 -4 -13 8 627.14 148.79
 4 -13 -8 604.04 126.29
 4 -13 -8 605.24 108.79
 -4 -13 8 565.14 84.89
 -5 13 9 34.3 32.5
 -5 13 9 25.6 30.7
 5 -13 -9 42.8 40.3
 -5 -13 9 58.19 26
 5 -13 -9 63.19 48
 -5 -13 9 200.08 93.39
 -5 -13 9 60.29 17.8
 -6 13 10 47.3 33.5
 -6 13 10 96.39 43.5
 -6 -13 10 102.39 35.2
 -6 -13 10 102.39 21.4
 6 -13 -10 68.59 58.29
 6 -13 -10 64.09 16.7
 6 -13 -10 51.29 46.5
 -6 -13 10 90.09 86.29
 -6 14 2 405.26 70.89
 -6 -14 2 251.97 46.8
 6 -14 -2 93.29 75.59
 6 -14 -2 231.38 70.89
 -6 -14 2 388.46 62.49
 -6 -14 2 160.08 100.69
 6 -14 -2 360.16 66.69
 5 14 -1 53.29 34.9
 5 -14 -1 81.89 41.9
 -5 -14 1 72.09 78.89
 -5 -14 1 46.4 19.2
 5 -14 -1 58.99 29.4
 5 -14 -1 22.8 64.89
 -5 -14 1 43.5 17.3
 4 14 0 242.08 89.09
 -4 -14 0 468.35 66.69
 4 -14 0 464.05 74.39
 -4 -14 0 468.85 68.39
 4 -14 0 560.04 83.49
 4 -14 0 225.08 102.19
 -4 -14 0 340.17 110.79
 3 14 1 49.1 34.4
 3 -14 1 26.5 19.4
 -3 -14 -1 71.79 25.5
 -3 -14 -1 23.9 12.8
 3 -14 1 -15.2 62.39
 3 -14 1 24.1 25.6
 2 14 2 -35.7 30.2
 2 -14 2 -2.7 16.4
 2 -14 2 -3.8 64.29
 -2 -14 -2 7.8 11.3
 2 -14 2 3.6 21.5
 1 14 3 31.8 37.3
 -1 -14 -3 8.6 26.2
 1 -14 3 128.19 63.89
 -1 -14 -3 28 15.9
 1 -14 3 14.8 18.6
 0 14 4 1083.79 151.48
 0 -14 4 989.3 187.48
 0 -14 -4 1089.89 160.98
 0 -14 -4 1366.16 178.58
 0 -14 4 1223.58 153.98
 0 -14 4 1053.89 157.58
 -1 14 5 144.09 77.29
 -1 14 5 320.87 54.69
 -1 14 5 409.26 48.6
 1 -14 -5 318.27 61.99
 1 -14 -5 294.37 92.19
 1 -14 -5 291.97 60.79
 -1 -14 5 311.97 94.29
 -1 -14 5 245.68 48
 -2 14 6 847.22 111.99
 -2 14 6 839.22 117.99
 2 -14 -6 699.53 149.59
 -2 -14 6 856.31 160.98
 -2 -14 6 697.93 131.89
 2 -14 -6 853.41 121.89
 -3 14 7 -6.8 12.1
 -3 14 7 11.5 20.6
 -3 -14 7 52.69 70.89
 3 -14 -7 10.5 31.3
 -3 -14 7 4.6 10.2
 3 -14 -7 51.29 45.1
 -3 -14 7 24 19.1
 -4 14 8 17.3 26.6
 -4 14 8 46.4 28.4
 4 -14 -8 26.9 36.3
 -4 -14 8 -26.1 72.19
 -4 -14 8 12 13.5
 4 -14 -8 7.8 42.4
 -4 -14 8 22.5 23
 -5 14 9 6.6 29.1
 -5 14 9 -18.4 25.9
 -5 -14 9 105.99 87.29
 5 -14 -9 18.9 43.8
 -5 -14 9 15.3 22.2
 5 -14 -9 95.79 48.8
 -5 -14 9 37.2 15.5
 -6 14 10 177.68 61.69
 -6 14 10 268.67 63.39
 -6 -14 10 212.58 49.99
 -6 -14 10 305.97 44.9
 6 -14 -10 419.06 93.99
 6 -14 -10 163.28 68.19
 6 15 -2 63.99 44
 6 -15 -2 12.7 57.09
 -6 -15 2 2.8 14.7
 -6 -15 2 17.1 76.89
 6 -15 -2 0.4 40.3
 6 -15 -2 0.6 22
 -6 -15 2 16.4 15.7
 5 15 -1 -5.6 34.5
 -5 -15 1 4.7 11
 -5 -15 1 -34.3 69.79
 5 -15 -1 -3.3 33.7
 5 -15 -1 -29.1 50.79
 -5 -15 1 -13.8 13.3
 4 15 0 1.5 32.3
 4 -15 0 80.79 71.59
 -4 -15 0 122.09 84.29
 -4 -15 0 57.89 20.2
 4 -15 0 81.09 30.8
 4 -15 0 73.59 35.8
 -4 -15 0 75.59 23.9
 3 -15 1 586.34 170.08
 3 -15 1 801.22 126.19
 -3 -15 -1 856.71 122.39
 3 -15 1 875.61 124.59
 -3 -15 -1 970.6 129.29
 2 15 2 22.4 37
 -2 -15 -2 111.19 33.5
 2 -15 2 12 58.29
 -2 -15 -2 88.19 24.3
 2 -15 2 84.59 25.6
 2 -15 2 110.39 31.2
 1 15 3 376.36 105.99
 -1 -15 -3 469.25 93.09
 -1 -15 -3 500.65 76.09
 1 -15 3 372.16 123.29
 1 -15 3 459.55 71.49
 0 15 4 2.4 13.6
 0 15 4 48.6 54.69
 0 -15 4 1.8 4.3
 0 -15 -4 4.2 23.3
 0 -15 4 -0.3 12.8
 0 -15 4 0.7 17.3
 0 -15 4 -25.2 43.7
 0 -15 -4 -23.3 25.9
 -1 15 5 26.1 18.3
 -1 15 5 38 52.59
 -1 -15 5 21.9 12.7
 1 -15 -5 -2.2 27.5
 -1 -15 5 4.7 42.5
 1 -15 -5 9.8 26.4
 1 -15 -5 31.8 40.8
 -2 15 6 50.89 23.4
 -2 15 6 4.6 4.9
 2 -15 -6 -19.6 42.2
 2 -15 -6 -36.6 20.5
 -2 -15 6 -17 26.9
 -2 -15 6 12.5 126.09
 -2 -15 6 -5.3 10
 -3 15 7 594.04 81.79
 -3 15 7 512.05 98.19
 3 -15 -7 620.74 101.59
 -3 -15 7 593.14 141.99
 -3 -15 7 603.34 94.49
 3 -15 -7 453.35 127.19
 -4 15 8 76.09 30.7
 -4 15 8 -10.6 15.8
 -4 -15 8 8.9 14.9
 -4 -15 8 -21.8 68.39
 4 -15 -8 -15.5 37.5
 4 -15 -8 -34.9 31.6
 -4 -15 8 -3.2 12.8
 -5 15 9 200.48 49.8
 -5 15 9 90.19 46.2
 5 -15 -9 213.48 65.79
 -5 -15 9 220.38 118.49
 -5 -15 9 190.78 42.6
 -5 -15 9 221.78 38.5
 5 -15 -9 161.08 64.49
 6 16 -2 96.49 50.29
 6 -16 -2 297.57 61.89
 -6 -16 2 217.68 47.2
 6 -16 -2 36.7 66.39
 6 -16 -2 168.38 58.59
 5 16 -1 104.19 56.29
 5 -16 -1 181.48 56.19
 -5 -16 1 193.98 43.9
 5 -16 -1 295.97 52.79
 5 -16 -1 39.9 69.09
 4 16 0 67.29 47.8
 4 -16 0 190.58 45.8
 4 -16 0 160.68 46.4
 -4 -16 0 115.69 29.8
 -4 -16 0 44.2 76.69
 4 -16 0 36.3 56.59
 -4 -16 0 224.68 40.1
 3 16 1 46.5 44.8
 -3 -16 -1 78.09 23
 -3 -16 -1 150.68 46
 3 -16 1 96.09 35.8
 3 -16 1 59.69 59.59
 2 16 2 11.5 41.2
 -2 -16 -2 13.5 19.5
 2 -16 2 41.6 53.99
 2 -16 2 19.4 18.5
 2 -16 2 21 23.4
 -2 -16 -2 23 16
 1 -16 3 252.17 46.3
 -1 -16 -3 212.28 69.39
 -1 -16 -3 194.38 50.49
 0 -16 4 467.05 67.89
 0 -16 -4 378.56 96.39
 0 -16 4 479.75 61.19
 0 -16 4 399.56 118.09
 0 -16 -4 343.77 80.99
 -1 16 5 518.25 98.59
 -1 -16 5 749.82 92.99
 1 -16 -5 677.43 109.09
 1 -16 -5 653.83 131.39
 1 -16 -5 782.02 107.29
 -1 -16 5 662.03 133.99
 -2 16 6 148.19 40.8
 -2 16 6 213.88 28
 2 -16 -6 137.49 60.49
 -2 -16 6 159.98 84.79
 -2 -16 6 117.89 50.49
 -3 16 7 124.79 20.4
 -3 16 7 43.3 31
 -3 -16 7 84.89 34.3
 3 -16 -7 79.19 38.4
 3 -16 -7 91.59 54.59
 -3 -16 7 157.38 87.79
 -4 16 8 -1.2 12.1
 -4 16 8 12.5 25.5
 4 -16 -8 47 48.5
 -4 -16 8 7.5 74.49
 -4 -16 8 2.1 15.5
 4 -16 -8 6 38.2
 -5 16 9 86.79 30.8
 -5 16 9 134.99 53.79
 5 -16 -9 93.69 63.49
 -5 -16 9 87.59 96.69
 -5 -16 9 103.09 26.8
 5 -16 -9 221.38 63.69
 5 17 -1 -56.69 46.2
 -5 -17 1 54.19 85.69
 5 -17 -1 51.39 38
 -5 -17 1 9 16.4
 5 -17 -1 -51.99 50.89
 -5 -17 1 7.5 15.2
 5 -17 -1 -3.9 18.5
 -4 -17 0 255.37 51.79
 4 -17 0 225.38 59.79
 -4 -17 0 245.68 102.39
 4 -17 0 118.89 71.69
 -4 -17 0 302.47 51.49
 4 -17 0 241.18 52.99
 3 17 1 53.19 61.19
 3 -17 1 62.09 58.89
 -2 -17 -2 872.21 110.89
 -2 -17 -2 815.02 120.49
 2 -17 2 430.26 137.69
 2 -17 2 707.43 110.39
 2 -17 2 729.13 107.79
 1 17 3 -62.49 52.49
 1 -17 3 19.3 17
 1 -17 3 -29.3 50.39
 -1 -17 -3 -6.3 17.6
 -1 -17 -3 9.7 29.2
 0 17 4 153.78 77.59
 0 -17 4 236.78 41.8
 0 -17 4 115.19 95.19
 0 -17 -4 338.07 64.99
 -1 17 5 43.7 24.5
 -1 17 5 33.8 60.69
 1 -17 -5 21.5 38.7
 -1 -17 5 55.09 30.7
 1 -17 -5 64.69 32.2
 -1 -17 5 -24.4 43.8
 1 -17 -5 42.4 32.2
 -1 -17 5 42.4 13.1
 -2 17 6 400.86 81.49
 2 -17 -6 603.14 127.69
 -2 -17 6 549.85 132.99
 -2 -17 6 452.05 103.29
 2 -17 -6 521.05 87.29
 -3 17 7 75.09 32.7
 -3 -17 7 37.7 29.3
 3 -17 -7 112.09 40
 3 -17 -7 57.29 52.09
 -3 -17 7 32.6 70.59
 -4 17 8 385.36 103.39
 4 -17 -8 506.05 138.19
 -4 -17 8 739.23 92.49
 -4 -17 8 607.54 91.89
 4 -17 -8 561.24 113.49
 -4 -17 8 572.64 150.08
 -5 17 9 -3.1 30.1
 5 -17 -9 23 45
 -5 -17 9 -25.3 74.39
 5 -17 -9 -2.6 40.8
 5 -18 -1 604.74 97.19
 5 -18 -1 686.83 109.19
 -5 -18 1 480.35 82.69
 -5 -18 1 409.96 133.09
 5 -18 -1 339.07 120.49
 -5 -18 1 581.14 90.29
 4 18 0 43.4 64.39
 -4 -18 0 185.38 43.1
 -4 -18 0 164.08 140.09
 4 -18 0 268.87 51.19
 -4 -18 0 200.68 44.9
 4 -18 0 83.89 82.89
 4 -18 0 236.68 58.89
 3 18 1 34.5 54.79
 -3 -18 -1 5.9 22.9
 3 -18 1 31.2 59.79
 -3 -18 -1 5.5 14.8
 3 -18 1 4.7 32.7
 3 -18 1 1.2 15.7
 2 18 2 1.8 57.49
 -2 -18 -2 3.1 15.1
 -2 -18 -2 21 22.8
 2 -18 2 1.2 19.6
 2 -18 2 -24.9 47
 2 -18 2 -32.5 21.9
 1 18 3 48.8 64.99
 -1 -18 -3 181.18 57.49
 1 -18 3 203.68 42
 -1 -18 -3 251.57 53.99
 1 -18 3 150.88 73.39
 0 18 4 77.39 75.39
 0 -18 -4 322.17 94.29
 0 -18 4 298.57 43.9
 0 -18 -4 225.68 49.5
 0 -18 4 170.38 84.79
 -1 -18 5 451.35 60.99
 -1 -18 5 447.26 63.59
 -1 -18 5 356.06 77.99
 1 -18 -5 505.35 117.09
 1 -18 -5 416.26 80.09
 -2 18 6 110.99 36.9
 2 -18 -6 127.59 64.29
 2 -18 -6 202.98 50.29
 -2 -18 6 155.08 50.99
 -2 -18 6 137.49 79.49
 -3 18 7 29 29.4
 -3 -18 7 -9.9 22.3
 3 -18 -7 -11 48.6
 -3 -18 7 131.99 81.59
 3 -18 -7 31.9 37.8
 -4 18 8 14.1 29.2
 4 -18 -8 26 58.39
 -4 -18 8 -4 18.1
 4 -18 -8 28.1 39.7
 -4 -18 8 -67.89 83.89
 -4 -18 8 15.3 17.3
 -5 -18 9 -1.9 15.8
 5 -19 -1 16.8 24.6
 4 19 0 -8.9 51.19
 4 -19 0 18.4 68.59
 4 -19 0 16.5 33.7
 -4 -19 0 12.8 76.79
 4 -19 0 36 24.7
 -4 -19 0 24.5 20
 -4 -19 0 35 25.3
 3 19 1 241.28 96.69
 -3 -19 -1 475.65 76.59
 3 -19 1 488.05 74.09
 3 -19 1 479.95 84.59
 3 -19 1 240.78 106.89
 -3 -19 -1 537.65 87.69
 2 19 2 152.38 74.19
 2 -19 2 173.28 45.5
 2 -19 2 170.68 39.6
 -2 -19 -2 179.78 42
 -2 -19 -2 183.18 58.39
 2 -19 2 103.89 72.39
 1 19 3 33.1 70.69
 -1 -19 -3 201.78 61.49
 1 -19 3 205.88 39.5
 1 -19 3 90.99 72.29
 -1 -19 -3 160.18 41.9
 0 19 4 26.8 59.69
 0 -19 -4 34.7 28.4
 0 -19 4 78.29 63.79
 0 -19 4 93.29 21.9
 0 -19 -4 105.29 49.1
 1 -19 -5 -13.7 26
 -1 -19 5 18.2 9.4
 -1 -19 5 2.8 20.3
 -1 -19 5 15.1 44.2
 1 -19 -5 -2.4 33.7
 -2 19 6 -52.69 26.7
 2 -19 -6 16.8 39.9
 -2 -19 6 -3.4 65.89
 -2 -19 6 23.5 40.9
 2 -19 -6 86.89 36
 -3 19 7 323.97 88.99
 -3 -19 7 754.92 162.88
 3 -19 -7 499.75 93.89
 -3 -19 7 510.95 94.09
 3 -19 -7 459.75 138.19
 -4 19 8 56.59 38.2
 -4 -19 8 18.5 41.5
 -4 -19 8 71.19 94.59
 4 -19 -8 32.4 50.19
 4 -19 -8 73.79 51.79
 -4 -19 8 66.99 25.7
 4 20 0 141.49 76.99
 -4 -20 0 287.27 110.19
 4 -20 0 317.67 70.89
 4 -20 0 292.37 59.89
 -4 -20 0 299.67 59.19
 4 -20 0 140.29 88.89
 3 20 1 -67.69 63.69
 -3 -20 -1 31 30.7
 3 -20 1 4.2 64.99
 3 -20 1 -8.6 16.9
 -3 -20 -1 13.9 19.3
 3 -20 1 -8.5 30.3
 2 20 2 -49.8 63.49
 2 -20 2 72.79 34.4
 2 -20 2 44.6 62.09
 -2 -20 -2 55.79 34
 -2 -20 -2 48.1 26.6
 2 -20 2 80.49 25.2
 1 20 3 -52.39 54.29
 1 -20 3 30.9 59.79
 -1 -20 -3 -5 29.9
 -1 -20 -3 -3.4 22.5
 1 -20 3 14.7 14.6
 0 -20 -4 555.74 122.19
 0 -20 4 402.06 135.19
 0 -20 4 542.35 72.59
 0 -20 -4 390.56 90.29
 -1 -20 5 -7.1 48.6
 1 -20 -5 8 41.9
 -1 -20 5 25.8 11.7
 -1 -20 5 17.4 23.4
 1 -20 -5 52.59 32.5
 -2 20 6 241.88 65.69
 -2 -20 6 247.28 104.99
 2 -20 -6 225.08 59.99
 2 -20 -6 245.88 79.09
 -2 -20 6 400.46 95.19
 -3 20 7 -7 30.2
 -3 -20 7 3.7 27.9
 -3 -20 7 138.89 147.19
 3 -20 -7 1.3 36.2
 3 -20 -7 47.5 57.89
 -4 20 8 0.7 32.6
 -4 -20 8 -27.3 17.9
 -4 -20 8 -32.9 74.69
 -4 -20 8 16.7 21
 4 -20 -8 6.2 38.7
 3 21 1 99.29 80.29
 3 -21 1 140.89 49.5
 -3 -21 -1 136.89 41.3
 3 -21 1 95.59 81.49
 3 -21 1 326.07 53.79
 -3 -21 -1 254.17 67.99
 2 21 2 159.58 88.09
 -2 -21 -2 358.56 78.39
 2 -21 2 340.27 69.79
 -2 -21 -2 213.48 53.89
 -1 -21 -3 98.89 39.2
 1 -21 3 192.28 38.7
 -1 -21 -3 128.49 51.09
 1 -21 3 98.89 78.79
 0 -21 4 38.2 61.99
 0 -21 -4 61.79 28
 0 -21 -4 123.29 56.49
 -1 -21 5 -3.3 10.2
 -1 -21 5 24.4 26.7
 1 -21 -5 2.4 30.6
 1 -21 -5 -2.7 38.9
 -1 -21 5 -38.8 41.8
 -2 -21 6 95.59 47.6
 -2 -21 6 110.89 42.4
 -2 -21 6 115.59 26.3
 2 -21 -6 43.7 57.09
 2 -21 -6 105.59 44.9
 -2 -21 6 -70.79 65.19
 -3 21 7 -30 34.2
 -3 -21 7 71.79 22.2
 3 -21 -7 112.09 46.4
 -3 -21 7 101.89 41.5
 3 -21 -7 47.4 53.99
 -3 -21 7 20.7 83.89
 3 -22 1 33.3 39.3
 -3 -22 -1 69.39 32.6
 -3 -22 -1 49.2 32.8
 2 -22 2 -44 60.89
 2 -22 2 10.4 32.9
 -2 -22 -2 -9.6 25.8
 -2 -22 -2 24 30.9
 -1 -22 -3 78.99 41.4
 1 -22 3 179.38 143.69
 -1 -22 -3 142.89 55.89
 0 -22 4 79.89 63.09
 0 -22 -4 21.4 76.29
 1 -22 -5 524.15 130.39
 -1 -22 5 609.34 143.89
 -1 -22 5 603.34 80.19
 1 -22 -5 417.06 118.79
 -1 -22 5 467.05 100.19
 -2 -22 6 25.8 41.5
 2 -22 -6 21.3 47
 -2 -22 6 4.2 29
 -2 -22 6 -6 11.1
 -2 -22 6 -45.8 70.79
 2 -22 -6 5.4 34.6
 2 -23 2 271.07 65.79
 -2 -23 -2 138.29 60.49
 1 -23 3 90.99 68.09
 -1 -23 -3 97.39 52.29
 -1 -23 -3 27 42.2
 1 -23 3 98.29 39
 0 -23 -4 15.2 46.8
 1 -23 -5 7.2 44.5
 -1 -23 5 -2.5 46.7
 1 -23 -5 -1 30.4
 -8 0 3 -6.3 14.8
 8 0 -3 -18.4 13.8
 8 0 -3 -6.9 43.5
 -8 0 3 33.6 39.4
 -7 0 2 759.92 131.39
 7 0 -2 782.72 112.89
 7 0 -2 805.72 119.79
 -7 0 2 905.61 122.49
 6 0 -1 2.6 15.6
 6 0 -1 -4 9.6
 6 0 -1 -21.8 46.7
 -6 0 1 -21.8 27.8
 5 0 0 795.12 128.49
 -5 0 0 539.75 106.39
 5 0 0 626.94 89.69
 5 0 0 748.63 99.19
 4 0 1 -14.8 12.8
 4 0 1 -51.99 30
 4 0 1 -3.2 5.2
 -4 0 -1 -0.3 5.4
 -4 0 -1 8.7 21.8
 3 0 2 124.29 38.6
 -3 0 -2 186.78 31.2
 3 0 2 259.37 30.2
 -3 0 -2 194.58 45.6
 -3 0 -2 178.28 27.5
 -2 0 -3 8.3 3.8
 -2 0 -3 8 6.1
 2 0 3 4.8 4.5
 1 0 4 8856.41 1105.69
 -1 0 -4 8406.86 1106.49
 -1 0 -4 8490.85 1101.69
 1 0 4 8844.42 1101.99
 -1 0 6 449.76 94.39
 -1 0 6 585.94 75.19
 1 0 -6 530.45 83.89
 1 0 -6 597.14 71.19
 1 0 -6 503.25 78.39
 -1 0 6 490.55 77.09
 2 0 -7 -19.4 25.1
 -2 0 7 74.69 27.6
 -2 0 7 13.2 19
 3 0 -8 555.54 72.09
 -3 0 8 542.55 86.69
 3 0 -8 450.85 90.29
 3 0 -8 561.84 74.29
 4 0 -9 4.4 6.4
 4 0 -9 14.4 8.9
 4 0 -9 74.49 43.7
 -4 0 9 38 32.7
 -4 0 9 8 12.6
 5 0 -10 910.51 112.19
 5 0 -10 578.54 142.29
 5 0 -10 771.32 112.49
 -5 0 10 968.8 138.29
 -6 0 11 -17 21.2
 6 0 -11 14.9 11.5
 -6 0 11 22.8 37
 6 0 -11 18.7 49.3
 -7 0 12 173.98 62.09
 7 0 -12 181.88 40.2
 -7 0 12 234.98 59.89
 7 0 -12 179.78 87.79
 -8 1 3 96.89 44.9
 8 1 -3 57.89 22.9
 -8 1 3 60.49 24.5
 8 -1 -3 30.2 20.3
 8 -1 -3 31.6 79.79
 -8 -1 3 116.59 31.3
 -8 -1 3 71.79 46.2
 -7 1 2 -31.1 28.8
 7 1 -2 4 11.9
 -7 1 2 -4.1 11
 7 1 -2 6.3 15.7
 7 -1 -2 4.6 11.4
 7 -1 -2 -13.7 57.19
 7 -1 -2 -6.6 15.8
 -7 -1 2 57.59 36.1
 -6 1 1 62.49 35.6
 6 1 -1 131.79 31.4
 6 1 -1 129.49 27.8
 -6 -1 1 109.39 45.1
 6 -1 -1 100.59 33.5
 6 -1 -1 145.89 25.9
 6 -1 -1 40.5 55.49
 -5 1 0 298.37 64.09
 5 1 0 344.27 52.99
 5 1 0 252.87 43.1
 5 -1 0 311.97 42.5
 -5 -1 0 242.48 62.99
 5 -1 0 264.47 53.89
 5 -1 0 196.98 68.79
 4 1 1 472.45 73.39
 4 1 1 463.05 66.09
 -4 1 -1 518.15 70.09
 -4 1 -1 516.35 78.49
 -4 -1 -1 528.65 70.69
 4 -1 1 336.67 89.19
 -4 -1 -1 464.95 85.89
 4 -1 1 493.55 74.89
 -4 -1 -1 480.05 64.79
 4 -1 1 465.35 65.49
 3 1 2 523.05 85.99
 -3 1 -2 356.26 85.29
 -3 1 -2 576.24 77.29
 3 1 2 548.15 75.29
 3 -1 2 587.14 89.09
 3 -1 2 583.84 95.19
 -3 -1 -2 626.84 97.39
 -3 -1 -2 611.44 78.29
 3 -1 2 578.84 74.69
 -3 -1 -2 572.74 74.09
 -2 1 -3 1120.09 145.69
 2 1 3 1227.78 141.99
 -2 1 -3 1125.49 144.59
 -2 -1 -3 1041.8 141.09
 2 -1 3 1050.79 141.19
 -2 -1 -3 888.51 149.19
 -2 -1 -3 1171.48 145.19
 1 1 4 235.68 42.2
 1 1 4 292.77 38.7
 1 -1 4 302.17 37.8
 -1 -1 -4 293.27 38.1
 -1 -1 -4 273.97 45.7
 0 1 5 2147.99 276.57
 -1 1 6 240.38 40.3
 -1 1 6 248.68 39.8
 1 1 -6 261.57 43.9
 1 1 -6 245.18 52.49
 1 -1 -6 270.27 52.39
 -1 -1 6 257.07 33.3
 -1 -1 6 262.37 41.9
 -1 -1 6 283.77 65.99
 1 -1 -6 295.07 46.2
 2 1 -7 1765.62 214.58
 2 1 -7 1500.55 227.78
 -2 1 7 1704.93 224.08
 -2 1 7 1596.34 232.68
 -2 -1 7 1733.93 213.98
 2 -1 -7 1697.43 227.08
 -2 -1 7 1586.54 232.38
 2 -1 -7 1719.13 218.08
 -2 -1 7 1541.35 224.98
 2 -1 -7 1657.33 213.98
 -3 1 8 1191.78 150.78
 -3 1 8 1179.98 167.98
 3 1 -8 1115.89 164.58
 3 1 -8 1072.39 144.89
 -3 1 8 1095.09 156.68
 3 -1 -8 922.91 158.38
 -3 -1 8 1099.59 158.98
 3 -1 -8 1109.09 144.39
 3 -1 -8 1209.78 149.19
 -4 1 9 408.96 69.59
 -4 1 9 411.46 82.29
 4 1 -9 424.16 60.79
 4 1 -9 513.05 94.69
 -4 -1 9 471.65 85.19
 -4 -1 9 476.35 69.59
 4 -1 -9 387.26 59.49
 4 -1 -9 509.65 96.09
 4 -1 -9 491.55 66.49
 -5 1 10 180.58 48.1
 5 1 -10 128.09 59.29
 -5 1 10 129.19 36.6
 5 1 -10 135.59 26.3
 5 -1 -10 117.69 30.4
 5 -1 -10 127.89 23.9
 -5 -1 10 150.68 39.2
 -5 -1 10 150.98 53.49
 5 -1 -10 171.18 64.39
 6 1 -11 8.7 12
 6 1 -11 -5.9 48.5
 -6 1 11 -46.1 28.1
 -6 1 11 13.2 21.1
 -6 -1 11 -0.6 21.4
 6 -1 -11 11.5 9.8
 6 -1 -11 -13 8.2
 6 -1 -11 -1.6 51.69
 -6 -1 11 1.8 35.1
 -7 1 12 132.69 68.89
 7 1 -12 61.09 24
 -7 1 12 88.79 41
 -7 1 12 106.79 50.39
 7 1 -12 30.7 77.69
 -7 -1 12 81.39 52.79
 -7 -1 12 95.69 40.2
 7 -1 -12 -27.8 61.49
 7 -1 -12 132.09 25.7
 -8 2 3 254.87 60.09
 -8 2 3 220.58 48.9
 8 2 -3 175.58 40
 8 -2 -3 143.19 32.9
 8 -2 -3 11 67.69
 8 -2 -3 63.29 68.19
 -8 -2 3 228.48 49.8
 -8 -2 3 286.87 107.69
 -7 2 2 49.8 19.2
 7 2 -2 72.69 27.3
 -7 2 2 74.39 36.3
 7 2 -2 63.59 20.2
 7 -2 -2 85.39 19.9
 7 -2 -2 40 60.49
 -7 -2 2 87.49 40.7
 7 -2 -2 47.2 23.2
 -7 -2 2 24.6 16.2
 6 2 -1 709.23 99.19
 -6 2 1 733.73 113.99
 6 -2 -1 671.73 97.09
 6 -2 -1 805.82 108.39
 -6 -2 1 739.83 136.99
 6 -2 -1 567.34 133.99
 -5 2 0 -27.8 21.6
 5 2 0 4.2 9.7
 5 -2 0 21.7 17.5
 5 -2 0 -4.5 42.5
 5 -2 0 -2.7 6.2
 -5 -2 0 0.2 4.4
 -5 -2 0 -41.9 31.3
 -4 2 -1 10.5 19.9
 -4 2 -1 19.4 9.1
 4 2 1 25.5 9.1
 4 -2 1 15 17.2
 -4 -2 -1 9.5 32.4
 -4 -2 -1 12.8 8.6
 4 -2 1 26.6 7.8
 -3 2 -2 -7.2 20.1
 3 2 2 5.8 8.3
 -3 2 -2 4.5 5.2
 -3 -2 -2 3.4 7.3
 3 -2 2 89.69 44.3
 -3 -2 -2 4.4 5.5
 -3 -2 -2 -65.69 34.8
 -2 2 -3 744.13 99.89
 -2 2 -3 859.51 103.79
 2 2 3 729.53 98.59
 -2 -2 -3 831.32 102.19
 2 -2 3 733.43 97.59
 -2 -2 -3 771.42 98.09
 2 -2 3 628.84 102.69
 -1 2 -4 117.49 30.8
 1 2 4 125.09 24.8
 1 -2 4 184.68 28.6
 -1 -2 -4 154.18 21.4
 0 2 -5 2307.07 313.67
 0 2 5 2410.16 312.07
 0 2 5 2477.55 308.37
 0 2 -5 2253.87 307.47
 0 -2 -5 2400.06 306.17
 0 -2 5 2288.77 306.27
 0 -2 5 2523.55 313.87
 -1 2 6 104.79 21.2
 -1 2 6 65.49 21.2
 1 2 -6 91.99 25
 1 -2 -6 104.49 22.9
 -1 -2 6 89.09 11.6
 -1 -2 6 133.39 34.3
 -1 -2 6 66.29 20.8
 1 -2 -6 80.89 19.1
 1 -2 -6 35.5 16.6
 2 2 -7 74.69 40.1
 -2 2 7 115.19 46.7
 -2 -2 7 101.19 35.9
 -2 -2 7 106.59 15.2
 -2 -2 7 57.69 32.2
 2 -2 -7 108.09 14.9
 2 -2 -7 88.89 22.9
 2 -2 -7 87.39 35
 -3 2 8 -5.6 15.8
 -3 2 8 -19.7 15.6
 -3 2 8 -7.1 22.6
 -3 2 8 -5.8 9.1
 3 2 -8 5.3 28.6
 3 2 -8 -0.8 6.2
 -3 -2 8 1.6 3.3
 3 -2 -8 2.5 20.9
 3 -2 -8 0.5 3.3
 3 -2 -8 -0.6 9.8
 -3 -2 8 -7.3 21.5
 4 2 -9 389.56 53.89
 -4 2 9 374.96 62.89
 -4 2 9 422.56 91.59
 -4 2 9 440.96 76.79
 4 2 -9 339.27 92.49
 -4 -2 9 388.96 77.99
 4 -2 -9 362.76 85.99
 -4 -2 9 394.56 60.69
 4 -2 -9 377.86 63.09
 4 -2 -9 339.37 50.99
 -5 2 10 173.78 46.8
 5 2 -10 157.68 32.7
 5 2 -10 273.97 77.69
 -5 2 10 247.98 61.39
 -5 -2 10 87.79 49.99
 5 -2 -10 102.09 64.69
 5 -2 -10 181.28 28.3
 -5 -2 10 170.68 45.8
 5 -2 -10 198.88 41.4
 -6 2 11 395.46 81.79
 -6 2 11 479.35 90.29
 6 2 -11 405.46 65.59
 6 2 -11 456.25 113.09
 -6 2 11 381.56 102.69
 6 -2 -11 326.17 104.09
 -6 -2 11 394.36 97.19
 -6 -2 11 475.55 83.59
 6 -2 -11 490.35 68.49
 6 -2 -11 452.35 63.49
 -7 2 12 -19.3 38.6
 7 2 -12 10.7 65.59
 -7 2 12 82.29 47
 -7 -2 12 -4.4 46.7
 -7 -2 12 45.9 37.6
 7 -2 -12 34.4 16.1
 7 -2 -12 13.2 58.89
 8 3 -3 37.1 20.2
 -8 3 3 75.89 38.3
 8 3 -3 19 14.5
 -8 -3 3 13.9 16.5
 8 -3 -3 -12 14
 8 -3 -3 -79.79 51.39
 8 -3 -3 -18.1 59.19
 -8 -3 3 66.89 38
 -7 3 2 36 33.4
 -7 3 2 54.69 19.4
 7 3 -2 37.1 18.8
 7 -3 -2 50.79 26.8
 7 -3 -2 21.6 56.29
 -7 -3 2 34.1 17.4
 7 -3 -2 29.2 13.1
 -7 -3 2 38.2 37.4
 6 3 -1 112.79 28.5
 -6 3 1 140.19 32.2
 6 3 -1 121.89 27
 -6 3 1 98.59 38.1
 -6 -3 1 123.69 21.8
 6 -3 -1 140.19 63.49
 -6 -3 1 139.09 52.29
 6 -3 -1 106.29 34.5
 6 -3 -1 107.39 24.1
 -5 3 0 976.2 138.59
 5 3 0 859.11 128.69
 5 3 0 907.41 132.79
 -5 3 0 1152.68 133.59
 5 -3 0 950.8 136.49
 5 -3 0 856.11 153.08
 -5 -3 0 986.6 152.88
 -5 -3 0 970.5 126.49
 5 -3 0 953 127.09
 4 3 1 151.58 29.4
 4 3 1 135.09 36.3
 -4 3 -1 192.48 30.6
 -4 3 -1 165.28 36.4
 -4 -3 -1 173.78 31.7
 -4 -3 -1 178.98 57.09
 -4 -3 -1 163.08 25.9
 4 -3 1 281.57 44.6
 4 -3 1 165.88 46.7
 4 -3 1 155.58 26
 -3 3 -2 2053.79 248.98
 -3 3 -2 2120.89 247.38
 3 3 2 1940.31 245.68
 3 3 2 1553.74 248.58
 -3 -3 -2 2237.68 249.58
 -3 -3 -2 2020.1 244.68
 3 -3 2 1557.24 252.27
 3 -3 2 1899.81 254.17
 -3 -3 -2 1525.95 260.77
 3 -3 2 1868.11 244.08
 -2 3 -3 61.09 13.6
 -2 3 -3 75.59 15.8
 2 3 3 36 10.4
 -2 -3 -3 68.19 12
 2 -3 3 39.8 15
 -2 -3 -3 72.79 15.7
 1 3 4 87.99 21.5
 -1 3 -4 119.09 24.5
 1 -3 4 119.09 23.2
 -1 -3 -4 108.69 17.6
 -1 -3 -4 146.99 26.9
 0 3 -5 6.6 14.1
 0 3 -5 -4.6 12.6
 0 3 5 2.6 10.6
 0 3 5 6 11.3
 0 -3 -5 -9.3 8.5
 0 -3 -5 -15.1 9.3
 0 -3 -5 17.6 14.2
 0 -3 5 3.2 15.5
 0 -3 5 6.5 13
 -1 3 6 1697.73 204.68
 1 -3 -6 1441.76 213.68
 1 -3 -6 1601.64 206.08
 -1 -3 6 1385.26 211.98
 1 -3 -6 1585.84 205.68
 -1 -3 6 1537.05 208.88
 2 3 -7 334.47 72.09
 -2 3 7 137.39 34.7
 -2 3 7 87.39 46.4
 2 -3 -7 225.48 50.29
 2 -3 -7 132.89 38.8
 -2 -3 7 169.68 23.7
 -2 -3 7 142.59 47.8
 -3 3 8 1380.26 170.98
 3 3 -8 988.5 180.88
 -3 3 8 1388.26 175.38
 -3 3 8 1232.28 184.68
 3 -3 -8 1304.27 164.38
 3 -3 -8 1315.77 179.88
 3 -3 -8 1173.18 172.38
 -3 -3 8 1295.17 164.48
 -3 -3 8 1319.17 181.38
 -4 3 9 159.28 43.1
 -4 3 9 109.59 46.5
 -4 3 9 228.88 40.9
 4 3 -9 107.79 57.59
 -4 -3 9 124.29 19.6
 4 -3 -9 110.59 52.19
 -4 -3 9 87.09 41.6
 4 -3 -9 91.59 29.1
 -4 -3 9 127.79 29.3
 4 -3 -9 118.19 19.9
 5 3 -10 107.49 59.39
 -5 3 10 160.88 45.6
 -5 3 10 91.39 29.8
 -5 3 10 49 40.8
 -5 -3 10 122.29 31.1
 5 -3 -10 80.19 17.7
 5 -3 -10 106.59 52.29
 5 -3 -10 71.29 25.3
 -5 -3 10 40.6 39.1
 6 3 -11 -47 49.6
 -6 3 11 24.6 38.4
 -6 3 11 -40.8 29
 -6 3 11 4.6 19.6
 6 -3 -11 49.2 53.49
 -6 -3 11 23.5 24.6
 6 -3 -11 6.1 8.8
 -6 -3 11 5.3 39.2
 6 -3 -11 13.6 15.2
 -7 3 12 174.38 51.89
 -7 3 12 197.48 60.99
 7 3 -12 136.19 85.89
 -7 3 12 145.39 62.39
 -7 -3 12 193.98 64.89
 7 -3 -12 43.5 78.59
 7 -3 -12 205.28 35.6
 7 -3 -12 169.98 32.8
 -7 -3 12 183.38 54.49
 8 4 -3 121.09 30
 -8 4 3 98.19 27.7
 -8 4 3 162.08 44.3
 8 -4 -3 36.1 72.29
 -8 -4 3 97.09 36.9
 8 -4 -3 3.5 59.29
 -8 -4 3 138.69 54.99
 -7 4 2 403.26 76.89
 7 4 -2 428.96 63.29
 7 4 -2 294.77 62.09
 -7 4 2 456.05 66.19
 7 -4 -2 245.08 90.39
 -7 -4 2 288.97 82.99
 7 -4 -2 347.87 57.49
 7 -4 -2 386.16 69.89
 -7 -4 2 455.55 71.49
 -6 4 1 71.19 30.8
 -6 4 1 30.7 15.2
 6 4 -1 28.5 16.3
 6 4 -1 43.9 19.2
 6 -4 -1 41.1 13.1
 6 -4 -1 17.5 45.4
 -6 -4 1 61.39 46.3
 6 -4 -1 15.1 21.4
 -6 -4 1 35.8 11.3
 5 4 0 306.77 54.89
 5 4 0 307.47 52.09
 -5 4 0 326.97 51.59
 -5 4 0 408.96 63.39
 5 -4 0 303.07 82.59
 5 -4 0 289.17 59.89
 -5 -4 0 376.46 88.49
 5 -4 0 360.76 49.1
 -5 -4 0 316.27 46.9
 -4 4 -1 -28.9 15.5
 4 4 1 1.3 12.2
 4 4 1 24.8 12.3
 -4 -4 -1 2.1 5.5
 4 -4 1 6 5.2
 4 -4 1 -15.4 27.2
 -4 -4 -1 149.29 50.69
 4 -4 1 24.4 18.5
 -3 4 -2 79.99 21.4
 -3 4 -2 84.99 17.5
 3 4 2 96.49 18.3
 3 4 2 71.79 20.9
 3 -4 2 90.79 29.3
 -3 -4 -2 79.69 43.6
 -3 -4 -2 95.19 20.3
 -3 -4 -2 101.89 17.2
 3 -4 2 100.39 31.7
 3 -4 2 85.49 14.9
 2 4 3 105.79 29.3
 -2 4 -3 121.69 18.2
 -2 -4 -3 74.49 18.2
 -2 -4 -3 99.29 21
 1 4 4 1557.74 199.38
 1 4 4 1678.13 201.98
 -1 4 -4 1354.76 200.98
 1 -4 4 1408.66 198.58
 -1 -4 -4 1627.24 201.88
 0 4 5 735.03 98.59
 0 4 5 671.23 98.49
 0 4 -5 675.53 99.59
 0 -4 -5 774.02 97.29
 0 -4 -5 592.04 107.79
 0 -4 5 647.64 96.59
 0 -4 -5 800.92 95.19
 0 -4 5 623.04 99.59
 1 4 -6 1090.99 175.58
 -1 4 6 1148.29 175.18
 -1 4 6 1174.48 185.48
 -1 4 6 1358.36 169.88
 1 -4 -6 1287.47 172.48
 -1 -4 6 1440.36 184.78
 -1 -4 6 1230.18 177.28
 1 -4 -6 1278.57 179.68
 1 -4 -6 1505.95 171.78
 -2 4 7 90.19 35.5
 -2 4 7 15.4 23.5
 2 4 -7 -34.9 36.6
 -2 -4 7 73.09 12.5
 2 -4 -7 33.2 18.4
 3 4 -8 206.38 63.39
 -3 4 8 309.37 50.99
 -3 4 8 195.28 57.49
 -3 4 8 287.27 44.7
 -3 4 8 259.17 65.29
 3 -4 -8 232.18 51.69
 -3 -4 8 288.97 37.5
 -3 -4 8 340.77 62.29
 3 -4 -8 288.97 56.89
 -4 4 9 84.19 28.8
 4 4 -9 108.79 59.79
 -4 4 9 77.99 34.8
 -4 4 9 96.89 41.5
 -4 -4 9 95.79 47
 4 -4 -9 66.99 27.1
 4 -4 -9 79.19 43
 -4 -4 9 155.78 30.4
 4 -4 -9 82.09 15.7
 -4 -4 9 94.09 16.2
 -5 4 10 746.33 116.79
 -5 4 10 608.84 134.99
 5 4 -10 691.93 148.19
 -5 4 10 877.31 124.29
 5 -4 -10 770.52 104.09
 -5 -4 10 849.41 116.29
 -5 -4 10 874.01 104.09
 5 -4 -10 824.52 140.29
 5 -4 -10 669.83 115.99
 -5 -4 10 833.42 136.79
 6 4 -11 153.58 77.39
 -6 4 11 268.87 67.19
 -6 4 11 137.99 54.89
 -6 4 11 229.68 59.19
 -6 -4 11 190.58 64.89
 6 -4 -11 253.97 37.1
 6 -4 -11 210.98 72.89
 6 -4 -11 265.57 54.79
 -6 -4 11 225.38 53.39
 -7 4 12 270.57 80.59
 -7 4 12 264.47 72.19
 7 4 -12 114.99 81.69
 -7 4 12 320.27 78.89
 -7 -4 12 294.67 83.79
 7 -4 -12 278.77 45.8
 7 -4 -12 170.18 91.09
 -7 -4 12 295.27 74.89
 7 -4 -12 329.67 53.69
 -7 5 2 -23.4 25.3
 7 5 -2 -0.8 12.7
 -7 5 2 8.2 11.3
 7 -5 -2 -9.5 17.1
 -7 -5 2 18.3 15.6
 7 -5 -2 -35.2 47.6
 -7 -5 2 0.5 36.9
 -7 -5 2 0.8 6.9
 7 -5 -2 11.3 11.9
 -6 5 1 -8.4 23.7
 6 5 -1 13.9 13.8
 -6 5 1 15.7 10.4
 6 5 -1 1.3 12
 -6 -5 1 4.7 6.3
 6 -5 -1 15.9 9.5
 -6 -5 1 -11.1 44.8
 6 -5 -1 -11.7 17.8
 6 -5 -1 -52.09 36.3
 5 5 0 18.6 14.4
 -5 5 0 -16.7 19.8
 -5 5 0 5.5 7.5
 5 5 0 -17.7 11
 5 -5 0 -14.5 35.9
 -5 -5 0 4.3 6.9
 -5 -5 0 -21.6 37.9
 5 -5 0 4.4 5.8
 -4 5 -1 1665.43 209.98
 -4 5 -1 1506.25 211.48
 4 5 1 1503.35 210.48
 4 5 1 1864.21 213.58
 -4 -5 -1 1298.67 229.08
 4 -5 1 1611.54 216.58
 4 -5 1 1581.84 220.28
 4 -5 1 1644.54 206.98
 -4 -5 -1 1541.95 207.28
 -4 -5 -1 1562.54 212.88
 3 5 2 325.87 45.6
 3 5 2 255.47 43.4
 -3 5 -2 306.87 40
 -3 5 -2 229.58 40.9
 -3 -5 -2 253.67 38.2
 -3 -5 -2 216.38 62.49
 3 -5 2 213.38 55.19
 3 -5 2 215.48 50.49
 -3 -5 -2 279.97 42.2
 -2 5 -3 2629.34 354.26
 2 5 3 3205.58 358.76
 2 -5 3 2821.72 353.86
 2 -5 3 2233.08 359.46
 -2 -5 -3 2633.04 352.86
 -2 -5 -3 2882.01 356.46
 1 5 4 86.39 27.3
 -1 5 -4 65.19 20.5
 1 5 4 94.39 18.3
 -1 -5 -4 129.89 26.9
 1 -5 4 86.49 21.7
 0 5 5 295.17 49.9
 0 5 5 331.97 55.19
 0 5 -5 293.97 54.39
 0 -5 -5 267.87 62.19
 0 -5 -5 303.37 48.7
 -1 5 6 108.89 24.3
 -1 5 6 70.79 25.7
 -1 5 6 62.49 26.3
 -1 -5 6 28.3 27.4
 1 -5 -6 59.89 17.8
 1 -5 -6 32 17.4
 -1 -5 6 13.8 16.6
 2 5 -7 1991.9 304.57
 -2 5 7 1884.91 300.27
 -2 5 7 2441.86 292.57
 -2 -5 7 2278.57 285.87
 2 -5 -7 2298.37 295.87
 -2 -5 7 2594.54 308.97
 2 -5 -7 2062.59 296.67
 -3 5 8 16.1 13
 -3 5 8 48.4 22.3
 -3 5 8 59.39 32.4
 3 5 -8 86.59 43.8
 -3 5 8 44.5 40.8
 3 -5 -8 49.7 23.4
 -3 -5 8 7.4 34.9
 -3 -5 8 29.3 8.1
 3 -5 -8 7.3 25.9
 -4 5 9 184.78 47
 4 5 -9 127.19 67.19
 -4 5 9 201.18 47.4
 -4 5 9 192.28 57.79
 4 -5 -9 235.68 32.1
 -4 -5 9 216.78 32.5
 4 -5 -9 224.08 61.69
 -4 -5 9 265.37 68.29
 -4 -5 9 274.67 43.4
 4 -5 -9 200.78 57.59
 -5 5 10 54.89 33.7
 -5 5 10 86.49 31.9
 -5 5 10 72.49 40.5
 5 5 -10 101.99 60.29
 5 -5 -10 27.4 25.7
 -5 -5 10 87.89 28.5
 5 -5 -10 56.39 13.2
 -5 -5 10 72.79 14.4
 -5 -5 10 32.6 44.9
 5 -5 -10 41.8 47.3
 -6 5 11 -17.2 28.3
 -6 5 11 -0.5 21.7
 -6 5 11 36.3 33.1
 6 5 -11 32.1 58.39
 6 -5 -11 -8.3 6.1
 6 -5 -11 3 52.09
 -6 -5 11 -20.1 18.9
 -6 -5 11 6.3 41.6
 6 -5 -11 16.1 21.9
 -7 5 12 31.4 46.5
 7 5 -12 -14.4 63.79
 -7 5 12 12.6 28.9
 -7 5 12 61.99 39.8
 7 -5 -12 -9.1 15.8
 7 -5 -12 66.79 69.79
 -7 -5 12 30.2 49
 -7 -5 12 -25.5 28.2
 7 -5 -12 -22.1 9.2
 7 6 -2 395.36 68.09
 -7 6 2 428.56 65.79
 -7 6 2 305.17 72.49
 -7 -6 2 487.85 74.29
 -7 -6 2 446.06 111.59
 -7 -6 2 394.56 57.49
 7 -6 -2 384.36 59.39
 7 -6 -2 263.67 91.79
 7 -6 -2 433.06 73.49
 6 6 -1 132.89 36.1
 -6 6 1 140.69 29.6
 6 6 -1 147.39 35.8
 -6 6 1 119.39 35.8
 6 -6 -1 154.08 41.6
 6 -6 -1 113.09 24.2
 -6 -6 1 108.29 23
 -6 -6 1 153.58 36.5
 6 -6 -1 179.68 62.29
 -6 -6 1 123.29 62.59
 -5 6 0 298.27 41.6
 5 6 0 268.37 46.7
 -5 6 0 266.07 49.5
 5 -6 0 177.18 57.69
 5 -6 0 218.38 36
 -5 -6 0 195.78 71.79
 -5 -6 0 233.68 44.4
 5 -6 0 200.38 51.69
 -5 -6 0 246.08 37.2
 4 6 1 -6.1 11.8
 -4 6 -1 6.5 6.9
 4 6 1 -3 12.5
 -4 6 -1 -7.2 14.7
 4 -6 1 -17.3 16.8
 4 -6 1 -7.3 4.6
 -4 -6 -1 -20.6 43
 4 -6 1 -7.8 25.3
 -4 -6 -1 1.9 7.3
 -4 -6 -1 -2.4 7
 3 6 2 724.83 89.99
 -3 6 -2 638.24 83.99
 -3 6 -2 595.14 83.79
 -3 -6 -2 593.24 86.49
 -3 -6 -2 437.56 107.99
 -3 -6 -2 659.23 83.39
 3 -6 2 579.54 92.09
 3 -6 2 564.94 88.09
 -2 6 -3 136.09 29.9
 2 6 3 147.99 39
 -2 -6 -3 135.29 27.1
 2 -6 3 143.59 29.4
 -2 -6 -3 120.99 25.4
 1 6 4 1566.04 208.68
 1 6 4 1605.54 215.28
 -1 -6 -4 1719.73 212.18
 -1 -6 -4 1692.73 212.18
 1 -6 4 1448.66 207.48
 0 6 5 621.34 91.19
 0 -6 -5 582.14 86.09
 0 -6 5 561.14 89.09
 0 -6 5 564.04 90.39
 0 -6 -5 614.84 90.29
 -1 6 6 872.11 135.89
 -1 6 6 1015.4 144.29
 1 -6 -6 696.13 141.59
 1 -6 -6 933.71 128.29
 -1 -6 6 1119.49 139.19
 2 6 -7 66.89 36.7
 -2 6 7 18.8 21.4
 -2 6 7 50.99 33.4
 -2 6 7 12.7 19.6
 -2 6 7 47.2 16.1
 -2 -6 7 142.19 38
 2 -6 -7 27.4 24.5
 -2 -6 7 73.59 39.2
 2 -6 -7 8.3 24.6
 -3 6 8 148.19 59.69
 3 6 -8 291.47 72.89
 -3 6 8 349.27 48.4
 -3 6 8 211.28 54.59
 -3 6 8 242.48 50.79
 3 -6 -8 293.17 61.09
 -3 -6 8 284.57 37.6
 3 -6 -8 212.68 60.59
 -4 6 9 112.49 29.6
 4 6 -9 232.08 72.89
 -4 6 9 210.38 49
 -4 6 9 86.19 48
 4 -6 -9 107.39 17.9
 -4 -6 9 103.19 25.8
 4 -6 -9 53.29 35.4
 -4 -6 9 167.38 67.29
 4 -6 -9 98.19 47.1
 -4 -6 9 97.69 19.2
 -5 6 10 200.88 48.9
 5 6 -10 79.19 75.79
 -5 6 10 242.58 55.89
 -5 6 10 356.76 74.99
 -5 -6 10 228.48 31.5
 5 -6 -10 176.88 30.6
 5 -6 -10 237.68 63.79
 -5 -6 10 238.98 48.1
 -5 -6 10 398.46 86.59
 5 -6 -10 144.19 45.6
 -6 6 11 548.15 90.49
 6 6 -11 242.38 105.69
 -6 6 11 460.45 111.69
 -6 6 11 410.06 88.09
 6 -6 -11 564.34 120.29
 6 -6 -11 427.06 85.99
 -6 -6 11 540.05 88.69
 6 -6 -11 457.05 67.59
 -6 -6 11 622.14 115.99
 -6 -6 11 564.44 67.89
 -7 6 12 203.58 56.59
 7 6 -12 136.89 88.49
 -7 6 12 98.89 58.99
 -7 6 12 153.98 53.59
 -7 -6 12 279.77 65.99
 -7 -6 12 263.47 78.09
 7 -6 -12 167.28 33
 7 -6 -12 180.38 53.69
 7 -6 -12 138.09 75.49
 -7 7 2 78.89 37
 7 7 -2 96.29 29.4
 -7 7 2 68.99 21.3
 7 -7 -2 -31.3 67.69
 7 -7 -2 29.5 60.59
 7 -7 -2 155.48 28.7
 -7 -7 2 183.58 72.19
 -6 7 1 31 13.1
 6 7 -1 44.8 20.3
 -6 7 1 53.09 27.3
 6 -7 -1 33.8 23.6
 6 -7 -1 37.9 11.5
 -6 -7 1 40.5 11
 -6 -7 1 -12.7 47.2
 6 -7 -1 25.6 47
 -6 -7 1 1.6 11.4
 5 7 0 875.71 124.79
 -5 7 0 949.01 125.69
 -5 7 0 899.21 128.69
 5 7 0 909.01 129.79
 -5 -7 0 1028.2 132.29
 -5 -7 0 750.82 158.18
 5 -7 0 1066.69 146.89
 5 -7 0 893.31 121.99
 5 -7 0 922.61 133.79
 -5 -7 0 928.01 122.79
 -4 7 -1 25.6 16.5
 -4 7 -1 10.3 6.8
 4 7 1 22.6 12.6
 4 7 1 16.4 14.5
 4 -7 1 13.7 26.3
 -4 -7 -1 1.9 8.2
 4 -7 1 -4.8 15.1
 -4 -7 -1 15.9 8.6
 -4 -7 -1 -41.3 44
 3 7 2 1954.7 248.18
 3 7 2 1712.63 241.28
 3 -7 2 1809.82 249.18
 3 -7 2 1887.31 245.48
 -3 -7 -2 1886.61 241.58
 -3 -7 -2 1937.71 245.48
 -2 7 -3 12.8 12.9
 -2 -7 -3 31 11.4
 2 -7 3 63.19 17.6
 -1 7 -4 319.67 44.7
 1 7 4 195.68 52.69
 1 7 4 151.58 28.4
 -1 -7 -4 242.08 40.8
 1 -7 4 147.79 30.1
 0 7 5 47.6 30.5
 0 7 5 42.1 12.3
 0 -7 -5 59.19 22.4
 0 -7 5 18 24.5
 0 -7 -5 51.19 22.5
 -1 7 6 2532.05 345.07
 1 -7 -6 2754.22 343.57
 1 -7 -6 2337.57 348.07
 -1 -7 6 3006.3 358.46
 -1 -7 6 2687.63 351.26
 -2 7 7 81.99 38.6
 -2 7 7 251.77 32.7
 -2 7 7 264.77 37.5
 -2 7 7 151.28 36.7
 2 -7 -7 203.68 50.69
 -2 -7 7 183.98 56.49
 2 -7 -7 189.08 41
 -2 -7 7 103.89 30.6
 3 7 -8 1106.29 190.98
 -3 7 8 1400.46 172.38
 -3 7 8 1081.69 182.18
 3 -7 -8 1072.99 179.98
 3 -7 -8 1332.67 178.38
 -3 -7 8 1481.45 197.28
 -3 -7 8 1266.47 162.68
 -4 7 9 194.78 61.59
 4 7 -9 171.48 74.49
 -4 7 9 275.77 54.19
 -4 7 9 333.87 59.39
 4 -7 -9 400.46 75.29
 4 -7 -9 216.28 59.39
 -4 -7 9 261.57 40.1
 -4 -7 9 401.86 100.09
 -4 -7 9 323.47 48.9
 5 7 -10 156.58 78.99
 -5 7 10 287.67 60.29
 -5 7 10 196.48 52.69
 -5 7 10 197.58 65.39
 -5 -7 10 249.48 36.9
 5 -7 -10 260.17 36.6
 -5 -7 10 266.87 75.79
 -5 -7 10 356.56 54.39
 5 -7 -10 245.38 68.79
 5 -7 -10 202.08 56.19
 -6 7 11 32.8 31.8
 -6 7 11 -5.6 42
 -6 7 11 18.1 23.7
 6 -7 -11 16.8 50.69
 -6 -7 11 -0.4 6.9
 -6 -7 11 72.69 52.89
 6 -7 -11 19.1 8.8
 -6 -7 11 26.4 27
 6 -7 -11 29.3 26.7
 -7 7 12 106.09 45.2
 -7 7 12 156.58 71.69
 -7 7 12 233.28 59.99
 7 -7 -12 221.88 33.2
 -7 -7 12 235.08 59.69
 7 -7 -12 136.19 44.2
 -7 -7 12 146.29 82.69
 7 -7 -12 119.19 78.19
 -7 8 2 39.6 17.4
 -7 8 2 44.5 28.4
 7 8 -2 53.59 26.1
 7 -8 -2 -13.7 66.99
 7 -8 -2 67.69 18
 -7 -8 2 109.59 69.89
 7 -8 -2 66.89 58.39
 -7 -8 2 69.39 17.9
 7 -8 -2 66.69 32.4
 -7 -8 2 61.59 26.1
 6 8 -1 583.14 97.59
 -6 8 1 674.33 90.09
 -6 8 1 583.04 94.79
 -6 -8 1 514.35 128.69
 6 -8 -1 532.05 116.39
 -6 -8 1 619.04 86.09
 -6 -8 1 810.82 101.29
 6 -8 -1 580.64 99.49
 6 -8 -1 633.94 86.09
 -5 8 0 63.49 22.5
 5 8 0 40.2 21.5
 -5 8 0 18.9 10.5
 5 8 0 30.4 14.6
 -5 -8 0 51.89 54.29
 5 -8 0 15.3 33.7
 5 -8 0 47.2 22.6
 -5 -8 0 34.3 11.8
 -5 -8 0 25.3 14.4
 5 -8 0 10.4 8.6
 -4 8 -1 59.99 13.7
 4 8 1 30.7 20.7
 4 8 1 56.59 17.1
 -4 8 -1 48.1 20.1
 4 -8 1 50.79 28.7
 -4 -8 -1 60.09 12.9
 -4 -8 -1 -11.2 53.89
 -4 -8 -1 39.4 14.9
 4 -8 1 24.2 22.8
 3 8 2 85.39 20.8
 3 8 2 59.79 24.6
 -3 -8 -2 85.99 21
 3 -8 2 102.39 26.4
 3 -8 2 124.19 30.6
 -2 8 -3 823.22 128.19
 2 8 3 908.31 137.59
 2 -8 3 1004.9 136.79
 2 -8 3 1097.19 129.09
 -2 -8 -3 1015.6 131.59
 1 8 4 253.67 40.8
 -1 -8 -4 331.47 50.59
 -1 -8 -4 350.96 54.39
 1 -8 4 236.68 40.6
 0 8 5 962.1 176.78
 0 8 5 1207.58 161.88
 0 -8 -5 1310.57 172.18
 0 -8 -5 1459.75 173.18
 -1 8 6 97.59 37.6
 -1 8 6 283.47 40.4
 1 -8 -6 85.69 30.5
 -1 -8 6 145.99 38.3
 1 -8 -6 194.28 50.69
 -2 8 7 492.35 62.09
 -2 8 7 402.46 74.19
 -2 -8 7 500.55 90.89
 2 -8 -7 436.46 77.49
 2 -8 -7 438.76 67.59
 -2 -8 7 296.67 64.49
 -3 8 8 44.6 27.1
 -3 8 8 47 31.6
 -3 8 8 -14.6 45.2
 -3 -8 8 128.19 58.19
 3 -8 -8 46.2 35.3
 -4 8 9 305.67 62.79
 -4 8 9 374.56 91.89
 -4 8 9 253.67 73.09
 -4 -8 9 367.36 52.89
 4 -8 -9 209.08 64.49
 4 -8 -9 293.47 95.29
 -4 -8 9 337.37 45.5
 -5 8 10 106.79 38.7
 -5 8 10 188.08 45.8
 -5 8 10 185.58 54.79
 -5 -8 10 171.88 72.29
 5 -8 -10 154.58 55.59
 -5 -8 10 175.88 43.7
 -5 -8 10 181.18 26.9
 5 -8 -10 136.59 47.9
 5 -8 -10 141.69 25.7
 -6 8 11 214.98 66.29
 -6 8 11 227.58 58.49
 -6 8 11 162.78 49.6
 -6 -8 11 222.48 56.69
 6 -8 -11 149.19 47.3
 6 -8 -11 136.89 68.49
 6 -8 -11 181.68 30.4
 -6 -8 11 278.07 79.19
 -6 -8 11 181.08 30
 -7 8 12 28.5 46.6
 -7 8 12 38.4 37.9
 -7 -8 12 36.5 12
 7 -8 -12 42.8 14.1
 7 -8 -12 8.2 30.9
 -7 -8 12 88.39 40.2
 7 -8 -12 17.8 60.49
 -7 9 2 33.7 28.3
 7 9 -2 -4.8 20.4
 -7 9 2 13.7 12.7
 -7 -9 2 8 9.6
 7 -9 -2 -7 72.79
 -7 -9 2 86.19 122.69
 -7 -9 2 8.5 15.3
 7 -9 -2 -10 51.69
 7 -9 -2 -6.7 19.4
 7 -9 -2 15.9 10.3
 6 9 -1 67.39 27.6
 -6 9 1 75.79 19.3
 -6 9 1 96.79 30.8
 6 -9 -1 49.6 14.9
 -6 -9 1 57.69 61.69
 6 -9 -1 77.89 49.2
 -6 -9 1 117.39 29.7
 6 -9 -1 122.19 37.9
 -6 -9 1 86.09 18.6
 6 -9 -1 -13.8 63.39
 -5 9 0 404.66 56.59
 5 9 0 285.07 67.19
 -5 9 0 374.66 61.79
 -5 -9 0 357.96 54.89
 -5 -9 0 320.57 102.09
 5 -9 0 487.45 84.59
 -5 -9 0 471.35 65.69
 5 -9 0 382.16 53.29
 5 -9 0 314.87 67.19
 4 9 1 654.43 104.29
 4 9 1 636.04 87.39
 -4 9 -1 647.34 88.39
 -4 -9 -1 367.16 123.89
 4 -9 1 634.54 101.59
 -4 -9 -1 687.63 89.49
 4 -9 1 624.44 100.39
 -4 -9 -1 717.93 94.89
 3 9 2 151.88 27
 -3 9 -2 163.08 30.1
 3 9 2 249.38 52.99
 3 -9 2 180.78 44.7
 3 -9 2 156.28 39.4
 -3 -9 -2 138.39 30.7
 -3 -9 -2 221.68 32.6
 2 9 3 705.83 122.19
 2 -9 3 817.42 112.99
 -2 -9 -3 914.21 118.59
 -2 -9 -3 911.41 116.49
 1 9 4 0.3 5.1
 1 9 4 -27.7 19.8
 -1 -9 -4 -2.4 10.9
 -1 -9 -4 4.5 10.1
 0 9 5 29.1 10
 0 9 5 5.8 37.1
 0 -9 -5 41.7 23
 0 -9 -5 43 22.4
 0 -9 5 15.4 22.2
 -1 9 6 257.07 35.7
 -1 9 6 199.48 58.49
 -1 9 6 213.18 42.1
 -1 -9 6 235.38 51.89
 1 -9 -6 216.58 54.89
 -1 -9 6 152.38 51.69
 1 -9 -6 226.68 41.9
 -1 -9 6 195.18 57.59
 1 -9 -6 192.18 45.2
 -2 9 7 2057.19 252.77
 -2 9 7 1685.23 257.07
 -2 -9 7 2221.58 279.57
 2 -9 -7 1827.82 266.37
 2 -9 -7 1901.31 256.27
 -3 9 8 188.88 39
 -3 9 8 75.89 35.3
 -3 9 8 263.37 41.7
 -3 -9 8 130.49 26.3
 -3 -9 8 157.08 28.9
 3 -9 -8 237.58 55.59
 3 -9 -8 90.99 46.5
 -3 -9 8 85.49 60.79
 -4 9 9 646.54 105.69
 -4 9 9 662.73 105.69
 -4 9 9 701.63 125.99
 4 -9 -9 531.85 121.29
 4 -9 -9 708.53 118.89
 -4 -9 9 825.62 100.69
 -4 -9 9 711.93 143.39
 -4 -9 9 727.53 94.59
 -5 9 10 2.9 40.1
 -5 9 10 19.3 30.6
 -5 9 10 26 23.8
 -5 -9 10 23.7 56.29
 -5 -9 10 52.69 22.8
 -5 -9 10 25.3 11.3
 5 -9 -10 26.8 9.1
 5 -9 -10 90.19 49.2
 5 -9 -10 33.7 37.4
 -6 9 11 -6.7 39.2
 -6 9 11 6.6 24.7
 -6 9 11 10.7 32
 -6 -9 11 2.4 7.4
 -6 -9 11 39.5 61.29
 6 -9 -11 -1.2 51.89
 6 -9 -11 20.2 31.1
 6 -9 -11 8.8 7.4
 -7 -9 12 51.89 15.5
 7 -9 -12 48.5 16
 -7 10 2 624.74 85.19
 -7 10 2 566.04 90.49
 7 10 -2 415.16 88.19
 7 -10 -2 496.05 124.29
 7 -10 -2 561.54 78.89
 -7 -10 2 622.84 79.39
 7 -10 -2 337.07 124.79
 7 -10 -2 574.84 94.79
 -7 -10 2 555.34 144.19
 -7 -10 2 754.72 99.89
 6 10 -1 13.1 25.6
 -6 10 1 13.9 10.6
 -6 10 1 57.39 24.9
 6 -10 -1 29.2 72.69
 6 -10 -1 46.5 48.1
 6 -10 -1 41.8 27.7
 6 -10 -1 21.4 8.9
 -6 -10 1 34.7 19.9
 -6 -10 1 10.3 10.3
 -6 -10 1 25.6 65.19
 5 10 0 322.97 74.79
 -5 10 0 447.56 59.69
 -5 -10 0 405.06 58.79
 -5 -10 0 400.86 107.19
 5 -10 0 432.16 86.49
 5 -10 0 196.18 99.39
 5 -10 0 396.06 73.69
 -5 -10 0 464.65 67.79
 4 10 1 -6.9 21.1
 -4 10 -1 -4 6.4
 -4 -10 -1 -49.6 49.7
 4 -10 1 -13.2 17.9
 4 -10 1 -3.9 25.5
 -4 -10 -1 3.6 6.7
 3 10 2 106.39 36.2
 -3 -10 -2 100.29 24.4
 3 -10 2 88.89 27.4
 3 -10 2 111.89 32.9
 -3 -10 -2 88.89 21.4
 2 10 3 67.59 28.6
 2 10 3 62.49 14.3
 -2 -10 -3 21.9 15.3
 2 -10 3 14 19.2
 -2 -10 -3 21 11.8
 -1 -10 -4 4145.08 484.95
 1 -10 4 3249.27 479.85
 0 10 5 26.5 9.4
 0 10 5 14.7 25.1
 0 10 5 21.2 8.8
 0 -10 -5 28.2 21.4
 0 -10 -5 21.1 18.8
 0 -10 5 56.09 21.2
 0 -10 5 -37.2 36
 -1 10 6 594.74 75.99
 -1 10 6 558.84 73.09
 -1 10 6 380.66 92.69
 1 -10 -6 531.55 90.69
 -1 -10 6 361.66 96.69
 1 -10 -6 459.05 87.99
 1 -10 -6 543.85 77.79
 -2 10 7 18 15.4
 -2 10 7 23.2 22.6
 -2 -10 7 28.2 48.8
 -2 -10 7 36.7 27.3
 2 -10 -7 48 25.5
 -3 10 8 157.38 42.6
 -3 10 8 400.56 75.69
 -3 -10 8 209.38 34.6
 3 -10 -8 185.48 49.6
 3 -10 -8 76.89 50.69
 -3 -10 8 111.29 74.19
 -3 -10 8 185.28 34.8
 -4 10 9 -3.6 19.7
 -4 10 9 9.9 26.7
 -4 10 9 -5.1 26.4
 4 -10 -9 8 33.5
 -4 -10 9 0.2 58.59
 -4 -10 9 -1.5 8.4
 4 -10 -9 3.2 33.8
 -4 -10 9 5.7 11.6
 -5 10 10 378.86 78.09
 -5 10 10 493.25 78.69
 -5 10 10 396.16 87.29
 -5 -10 10 441.16 60.79
 -5 -10 10 510.75 123.29
 5 -10 -10 291.07 92.49
 -5 -10 10 474.75 72.79
 5 -10 -10 415.86 96.19
 -6 10 11 5.2 31.1
 -6 10 11 157.68 56.09
 -6 -10 11 69.39 70.39
 6 -10 -11 -3.9 28.5
 -6 -10 11 -7.3 7.7
 6 -10 -11 -39.7 39.8
 -6 -10 11 -36.6 20.6
 6 -10 -11 -10.6 5.8
 -7 11 2 0.5 15.5
 -7 11 2 -30.6 20.9
 7 11 -2 22.5 19.3
 7 -11 -2 -55.19 64.49
 -7 -11 2 40.5 70.29
 7 -11 -2 -59.89 48
 7 -11 -2 0.9 9.4
 -7 -11 2 10.5 10.4
 -7 -11 2 0.7 15.9
 -6 11 1 12 10.6
 6 11 -1 0.1 24.9
 -6 -11 1 -56.19 56.99
 -6 -11 1 5.1 10.4
 6 -11 -1 -13.5 73.19
 6 -11 -1 8.8 9.3
 -6 -11 1 4 12.9
 6 -11 -1 2.9 18.1
 -5 11 0 240.88 40.1
 5 11 0 211.38 66.89
 5 -11 0 229.78 56.69
 5 -11 0 61.39 81.59
 5 -11 0 334.87 68.19
 -5 -11 0 283.47 49.4
 -5 -11 0 292.77 41.8
 -5 -11 0 236.38 90.89
 4 11 1 345.97 87.19
 -4 11 -1 493.95 70.29
 4 -11 1 212.18 102.69
 4 -11 1 484.95 81.29
 4 -11 1 500.15 84.19
 -4 -11 -1 696.93 97.49
 -4 -11 -1 556.94 69.79
 -4 -11 -1 498.85 119.59
 3 11 2 668.23 101.19
 -3 -11 -2 382.86 71.49
 -3 -11 -2 529.05 74.29
 3 -11 2 460.55 80.29
 3 -11 2 482.95 78.29
 2 11 3 459.15 102.69
 2 -11 3 577.44 90.89
 2 -11 3 606.24 84.19
 -2 -11 -3 579.84 90.29
 -2 -11 -3 635.94 85.59
 -1 -11 -4 197.88 38.3
 1 -11 4 74.39 29.7
 -1 -11 -4 153.48 44.5
 0 11 5 50.29 14.5
 0 11 5 74.79 16.2
 0 11 5 -3.3 31
 0 -11 -5 74.29 27.8
 0 -11 5 50.69 50.59
 0 -11 5 120.89 28.7
 0 -11 -5 50.59 24.8
 -1 11 6 383.36 57.59
 -1 11 6 416.76 60.09
 -1 11 6 513.35 96.99
 1 -11 -6 395.26 81.49
 -1 -11 6 269.37 84.89
 1 -11 -6 335.27 70.69
 -2 11 7 482.15 88.89
 -2 11 7 643.54 87.99
 -2 -11 7 594.44 132.19
 2 -11 -7 632.44 114.29
 2 -11 -7 626.84 93.59
 -3 11 8 764.72 111.99
 -3 11 8 707.23 118.79
 -3 -11 8 844.12 107.29
 3 -11 -8 662.83 134.89
 3 -11 -8 661.63 118.49
 -3 -11 8 879.81 157.28
 -3 -11 8 720.83 103.59
 -4 11 9 28.4 29.8
 -4 11 9 57.09 24.8
 -4 -11 9 82.49 22.4
 4 -11 -9 18.3 38
 -4 -11 9 4 59.59
 4 -11 -9 25.8 65.79
 -4 -11 9 47.8 15.1
 -5 11 10 155.58 42.1
 -5 11 10 70.69 34.9
 -5 11 10 73.19 39.5
 -5 -11 10 109.29 21.8
 5 -11 -10 85.09 46.8
 -5 -11 10 123.39 71.89
 -5 -11 10 117.09 32.8
 5 -11 -10 77.29 48.6
 -6 11 11 79.59 49.9
 -6 11 11 23.7 42.8
 -6 11 11 -11.7 30.5
 6 -11 -11 27.3 36.2
 6 -11 -11 17.4 9.8
 6 -11 -11 40.7 49.99
 -6 -11 11 -4.9 65.69
 -6 -11 11 17.3 26
 -6 -11 11 -3.7 9.1
 -7 12 2 -12.1 14.2
 7 12 -2 -0.8 18.7
 7 -12 -2 -36.9 49.8
 -7 -12 2 9.6 68.49
 7 -12 -2 3.6 66.59
 6 12 -1 271.57 80.49
 -6 12 1 348.07 57.09
 6 -12 -1 439.06 73.39
 6 -12 -1 164.58 104.29
 6 -12 -1 405.06 94.99
 -6 -12 1 277.87 105.99
 -6 -12 1 372.96 66.99
 -6 -12 1 446.06 58.49
 6 -12 -1 425.06 55.69
 5 12 0 -4.1 24.3
 -5 12 0 -2.6 8.8
 -5 -12 0 -4.6 59.59
 5 -12 0 -2.3 21.6
 5 -12 0 -11.2 26.8
 -5 -12 0 17.6 12
 -5 -12 0 -1.8 10.2
 5 -12 0 32.5 72.09
 4 12 1 16.4 31.1
 -4 -12 -1 107.49 22.1
 -4 -12 -1 35.7 63.99
 4 -12 1 50.09 27.1
 -4 -12 -1 55.39 19.1
 4 -12 1 95.09 34.5
 4 -12 1 54.29 70.19
 3 -12 2 -18.3 69.29
 3 -12 2 12.1 19.1
 -3 -12 -2 9.3 10
 3 -12 2 -17.5 22.1
 2 12 3 456.85 115.99
 2 -12 3 669.93 94.79
 -2 -12 -3 771.82 97.29
 2 -12 3 646.84 100.69
 -2 -12 -3 677.23 101.89
 1 12 4 15.3 33.7
 1 12 4 22.8 8.9
 1 -12 4 5.2 19.1
 -1 -12 -4 24.6 14.9
 -1 -12 -4 29.9 26.3
 1 -12 4 56.39 62.79
 0 12 5 1498.05 196.18
 0 12 5 1405.96 195.68
 0 -12 -5 1831.02 217.58
 0 -12 5 1439.76 204.28
 0 -12 -5 1408.16 206.48
 -1 12 6 -10.9 12.1
 -1 12 6 7.5 7.8
 -1 12 6 -39.1 29
 1 -12 -6 39.9 30.8
 1 -12 -6 -7 21.6
 -1 -12 6 -8 35.2
 1 -12 -6 38 30.1
 -1 -12 6 -10 21.9
 -1 -12 6 -52.99 46.3
 -2 12 7 70.39 25.2
 -2 12 7 50.29 59.19
 -2 12 7 60.09 21.3
 2 -12 -7 88.39 42.9
 2 -12 -7 170.78 40.2
 -2 -12 7 34 59.89
 -2 -12 7 65.49 38.2
 -3 12 8 -10.1 16.7
 -3 12 8 -12.4 21.5
 3 -12 -8 41.9 39.7
 3 -12 -8 23.8 33.9
 -3 -12 8 18.1 19.6
 -3 -12 8 -21.5 48.6
 -4 12 9 366.46 64.29
 -4 12 9 200.08 56.49
 4 -12 -9 225.18 68.59
 -4 -12 9 285.57 96.79
 -4 -12 9 228.98 56.09
 4 -12 -9 316.87 78.59
 -4 -12 9 325.97 50.39
 -5 12 10 -2.5 28.2
 -5 12 10 6.6 23.9
 -5 -12 10 16.6 65.09
 5 -12 -10 9.2 39.5
 -5 -12 10 57.99 23.7
 -5 -12 10 44.9 14.2
 5 -12 -10 38.9 37.3
 -6 12 11 236.98 72.49
 -6 12 11 207.48 67.59
 -6 12 11 371.46 77.29
 -6 -12 11 533.25 130.69
 6 -12 -11 278.47 91.79
 -6 -12 11 380.46 54.99
 6 -12 -11 445.96 107.59
 6 -12 -11 443.76 54.19
 -6 -12 11 509.45 78.59
 -6 13 1 17.3 13.5
 -6 13 1 42.6 25.2
 6 13 -1 10.3 31
 6 -13 -1 34.4 32
 -6 -13 1 52.19 21
 -6 -13 1 33.1 16
 -6 -13 1 -9.8 120.49
 6 -13 -1 -90.69 63.49
 6 -13 -1 33 12.9
 6 -13 -1 -34.1 44
 5 13 0 305.77 89.19
 -5 13 0 436.06 61.99
 -5 -13 0 270.87 104.29
 5 -13 0 184.88 101.59
 -5 -13 0 486.65 70.69
 5 -13 0 443.86 82.89
 5 -13 0 470.15 77.89
 -5 -13 0 414.96 62.49
 4 13 1 99.69 45.3
 -4 -13 -1 86.99 24.2
 4 -13 1 91.29 34.2
 -4 -13 -1 22.9 66.99
 4 -13 1 55.09 72.89
 -4 -13 -1 69.89 22.6
 4 -13 1 87.49 37.8
 3 13 2 955.7 166.08
 3 -13 2 1045.3 146.99
 -3 -13 -2 1153.68 146.79
 3 -13 2 1003.5 148.79
 2 13 3 272.57 83.89
 2 -13 3 201.68 44.7
 -2 -13 -3 219.58 53.49
 2 -13 3 165.78 90.39
 2 -13 3 177.08 49.2
 -2 -13 -3 233.78 42.3
 1 13 4 15.7 8.5
 1 13 4 -8.9 32
 -1 -13 -4 3.5 23.7
 1 -13 4 31.1 20.1
 -1 -13 -4 33.9 17.2
 1 -13 4 17.3 66.09
 0 13 5 -15 37.9
 0 13 5 -9.1 10.3
 0 -13 5 -11.8 51.59
 0 -13 -5 -14 26.3
 0 -13 5 33.1 20
 0 -13 5 -57.89 19.4
 -1 13 6 1077.69 134.59
 -1 13 6 1046.1 138.29
 1 -13 -6 874.31 141.39
 -1 -13 6 967.5 148.89
 -1 -13 6 1041.5 178.18
 -2 13 7 224.18 44.3
 -2 13 7 227.18 37.6
 -2 13 7 38 57.89
 2 -13 -7 214.98 53.99
 2 -13 -7 144.89 54.99
 -2 -13 7 112.29 47.8
 -2 -13 7 201.48 84.79
 -3 13 8 441.36 77.19
 -3 13 8 421.56 76.09
 -3 -13 8 524.45 129.19
 3 -13 -8 448.36 85.79
 3 -13 -8 397.76 108.09
 -3 -13 8 473.65 74.79
 -4 13 9 310.37 70.29
 -4 13 9 144.19 42.9
 4 -13 -9 94.69 54.59
 -4 -13 9 284.67 90.09
 4 -13 -9 204.78 58.49
 -4 -13 9 136.19 30.1
 -4 -13 9 215.88 37.6
 -5 13 10 19.5 27.8
 -5 13 10 49.2 35.5
 -5 -13 10 52.79 15.9
 -5 -13 10 46 23.3
 5 -13 -10 29 44.9
 5 -13 -10 25 41.3
 -5 -13 10 54.79 78.79
 -6 13 11 53.99 34.9
 -6 13 11 36.7 30.4
 -6 -13 11 36.7 77.29
 -6 -13 11 -3.2 23.7
 6 -13 -11 11.6 32.4
 6 -13 -11 -3.7 7
 -6 -13 11 -2.2 9.8
 6 -13 -11 -16.9 40
 -6 14 1 21 24.8
 6 14 -1 17.5 31.1
 -6 -14 1 -6.5 69.49
 6 -14 -1 -13.6 116.09
 6 -14 -1 42.2 45.6
 6 -14 -1 10.8 21.7
 -6 -14 1 25.7 17.1
 -6 -14 1 23.4 14.2
 5 14 0 129.99 50.49
 -5 -14 0 112.39 30.5
 5 -14 0 77.49 81.49
 5 -14 0 142.29 46.8
 5 -14 0 113.99 37.6
 -5 -14 0 142.39 83.49
 -5 -14 0 86.49 25.4
 4 14 1 10 36.2
 -4 -14 -1 12.8 13.7
 -4 -14 -1 -34.4 55.19
 -4 -14 -1 -1.8 10
 4 -14 1 -26.5 63.29
 4 -14 1 10.2 20.5
 4 -14 1 8.2 26.8
 3 14 2 22.8 36.7
 -3 -14 -2 62.99 20.2
 3 -14 2 42.6 72.79
 3 -14 2 58.79 28.1
 3 -14 2 58.69 27.2
 2 14 3 43.9 38.4
 -2 -14 -3 10.9 13
 -2 -14 -3 27 22
 2 -14 3 52.89 24.6
 2 -14 3 144.99 75.59
 1 14 4 681.03 96.79
 1 -14 4 680.03 108.09
 -1 -14 -4 916.21 124.29
 1 -14 4 493.05 153.78
 -1 -14 -4 899.41 111.49
 0 14 5 108.49 56.49
 0 14 5 280.27 40.2
 0 -14 5 264.27 49.3
 0 -14 5 130.69 62.59
 0 -14 -5 343.27 78.99
 0 -14 5 186.48 41.9
 -1 14 6 787.02 99.99
 -1 14 6 698.83 105.09
 -1 -14 6 574.04 143.49
 1 -14 -6 726.23 111.79
 1 -14 -6 719.23 131.79
 1 -14 -6 750.32 121.69
 -1 -14 6 784.62 116.69
 -2 14 7 -43.8 49.1
 -2 14 7 47.8 20.8
 -2 14 7 27.8 11.5
 2 -14 -7 40.8 28.7
 -2 -14 7 12.2 28.2
 -2 -14 7 44.6 62.19
 2 -14 -7 24.1 37.7
 -3 14 8 59.49 21.7
 3 -14 -8 34.8 43.8
 -3 -14 8 88.59 28.8
 3 -14 -8 142.19 44.8
 -3 -14 8 19.9 67.89
 -4 14 9 34.6 28
 -4 14 9 22.2 24.9
 4 -14 -9 47.2 44.2
 -4 -14 9 6 13.2
 -4 -14 9 24.4 15.9
 -4 -14 9 68.59 73.19
 4 -14 -9 45.2 40.2
 -5 14 10 291.87 70.89
 -5 14 10 380.56 81.49
 -5 -14 10 437.76 65.39
 5 -14 -10 371.56 101.89
 -5 -14 10 412.26 129.69
 -5 -14 10 326.47 55.99
 5 -14 -10 437.46 98.39
 -6 14 11 21.1 36.7
 -6 14 11 44.5 52.19
 -6 -14 11 65.69 30.9
 -6 -14 11 69.99 18.6
 6 -14 -11 39.6 44.6
 6 -14 -11 43.2 47.4
 6 -14 -11 44.6 12.8
 6 15 -1 -8.4 31.8
 -6 -15 1 -14.3 74.89
 -6 -15 1 42 23.5
 6 -15 -1 11.5 21.9
 -6 -15 1 35.4 17.7
 6 -15 -1 27.7 43.5
 6 -15 -1 28 59.49
 5 15 0 19 32.7
 -5 -15 0 -101.09 67.29
 -5 -15 0 -2.2 13.4
 5 -15 0 31.5 25.2
 5 -15 0 88.89 75.69
 5 -15 0 8.9 31.6
 -5 -15 0 0.7 11.7
 4 -15 1 607.34 103.79
 4 -15 1 660.33 101.99
 -4 -15 -1 690.63 98.39
 -4 -15 -1 592.94 92.99
 -4 -15 -1 568.74 148.69
 3 15 2 27.3 41.2
 -3 -15 -2 62.99 20.6
 3 -15 2 49.1 27.1
 -3 -15 -2 89.29 31.3
 3 -15 2 108.59 33
 3 -15 2 72.69 72.99
 2 -15 3 746.13 116.29
 -2 -15 -3 917.21 118.49
 2 -15 3 434.16 161.58
 2 -15 3 815.42 115.59
 -2 -15 -3 872.01 123.99
 1 15 4 -6.2 37.5
 -1 -15 -4 3.6 17.9
 1 -15 4 -4.5 16.3
 -1 -15 -4 7.5 25.3
 1 -15 4 53.89 58.29
 0 15 5 21.3 58.29
 0 15 5 93.39 23.2
 0 -15 -5 125.19 35.6
 0 -15 5 136.69 29.4
 0 -15 5 -0.9 43.9
 0 -15 -5 91.89 42.7
 0 -15 5 52.99 30
 -1 15 6 15.6 17.9
 -1 15 6 58.09 13.9
 -1 15 6 47.2 55.69
 -1 -15 6 4.1 38.2
 -1 -15 6 57.79 20
 1 -15 -6 46.6 32.3
 1 -15 -6 13.5 30.1
 1 -15 -6 30.5 29.2
 -1 -15 6 32.8 24.8
 -2 15 7 793.32 101.99
 -2 15 7 719.53 111.09
 -2 -15 7 617.24 127.29
 2 -15 -7 737.33 116.09
 2 -15 -7 884.31 145.69
 -3 15 8 85.89 21.6
 -3 15 8 54.19 30.2
 -3 -15 8 85.69 73.79
 3 -15 -8 56.09 36.7
 -3 -15 8 123.09 21.5
 3 -15 -8 52.89 45.6
 -3 -15 8 59.49 28.6
 -4 15 9 184.28 52.39
 -4 15 9 155.48 39.7
 -4 -15 9 274.87 40
 4 -15 -9 149.79 57.09
 -4 -15 9 196.28 39.6
 -4 -15 9 84.49 80.59
 4 -15 -9 147.59 62.89
 -5 15 10 -59.69 27.3
 -5 15 10 33.6 32.7
 5 -15 -10 7.2 42.6
 -5 -15 10 -21.5 17.6
 -5 -15 10 -4.1 12
 -5 -15 10 87.49 90.39
 5 -15 -10 -9.6 38.3
 6 16 -1 78.59 49.9
 -6 -16 1 64.79 24.9
 6 -16 -1 149.69 44
 6 -16 -1 15 69.99
 6 -16 -1 144.79 55.09
 5 16 0 35.3 39.7
 5 -16 0 76.09 29.7
 5 -16 0 119.29 44.5
 -5 -16 0 95.89 26.5
 -5 -16 0 63.49 24.9
 5 -16 0 -11.9 63.89
 -5 -16 0 96.79 136.99
 4 16 1 -30.1 29.9
 4 -16 1 18.7 24.5
 -4 -16 -1 -1.7 15.2
 -4 -16 -1 -2.4 11
 -4 -16 -1 57.79 69.69
 4 -16 1 -8.7 66.59
 4 -16 1 -4.5 27.1
 -3 -16 -2 126.59 37.4
 3 -16 2 182.58 44.4
 3 -16 2 58.69 67.89
 3 -16 2 59.59 33
 2 16 3 118.29 67.89
 -2 -16 -3 212.08 47.8
 2 -16 3 223.58 49.4
 -2 -16 -3 270.57 60.09
 2 -16 3 107.59 78.79
 2 -16 3 300.27 53.09
 1 -16 4 793.52 166.38
 1 -16 4 834.82 118.79
 -1 -16 -4 855.61 136.99
 -1 -16 -4 819.72 123.59
 0 16 5 389.36 59.99
 0 16 5 246.58 92.49
 0 -16 -5 441.06 78.79
 0 -16 -5 465.65 94.89
 0 -16 5 433.26 62.59
 0 -16 5 376.66 68.69
 0 -16 5 230.58 84.59
 -1 16 6 211.38 45.7
 -1 16 6 123.29 72.79
 -1 -16 6 230.68 56.99
 -1 -16 6 185.38 40.4
 1 -16 -6 259.47 55.29
 1 -16 -6 304.77 69.29
 -1 -16 6 137.59 66.49
 -2 16 7 3.7 58.89
 -2 16 7 92.09 16.8
 -2 16 7 38.7 25.5
 -2 -16 7 56.29 65.59
 -2 -16 7 58.09 19.2
 2 -16 -7 70.29 34
 -2 -16 7 30 36.9
 2 -16 -7 99.89 49.9
 -3 16 8 97.69 37.1
 -3 16 8 92.79 23.2
 -3 -16 8 139.49 79.99
 -3 -16 8 72.09 31.3
 -3 -16 8 121.89 20.9
 3 -16 -8 57.29 51.39
 3 -16 -8 74.89 42.7
 -4 16 9 67.59 35.2
 -4 16 9 55.89 23.9
 4 -16 -9 121.59 54.59
 -4 -16 9 177.38 31.9
 -4 -16 9 198.18 96.89
 4 -16 -9 72.49 47.9
 -5 16 10 98.59 53.19
 -5 16 10 44.1 28.1
 5 -16 -10 88.99 55.49
 5 -16 -10 100.39 99.79
 -5 -16 10 126.49 26.5
 -5 -16 10 129.09 92.19
 5 -17 0 318.57 65.89
 5 -17 0 133.79 84.29
 -5 -17 0 288.07 118.59
 5 -17 0 370.16 77.89
 -5 -17 0 285.07 55.49
 -5 -17 0 366.76 62.99
 4 17 1 -31 39.4
 4 -17 1 8.4 29.6
 4 -17 1 9.3 22.7
 -4 -17 -1 -3.5 72.19
 -4 -17 -1 -11.2 11.1
 4 -17 1 18.7 59.09
 -4 -17 -1 18 20.6
 3 -17 2 714.13 109.89
 -3 -17 -2 668.63 108.19
 3 -17 2 737.73 111.29
 -3 -17 -2 754.12 116.49
 2 17 3 -7.2 39.3
 2 -17 3 15 24.2
 -2 -17 -3 7.1 21.7
 -2 -17 -3 11.9 17.1
 2 -17 3 15.8 19.9
 2 -17 3 -29.3 49.5
 1 17 4 45.1 55.29
 -1 -17 -4 133.69 37.8
 1 -17 4 186.08 41.3
 -1 -17 -4 156.78 47.6
 1 -17 4 75.99 63.29
 0 17 5 41.5 19.2
 0 17 5 40.4 62.89
 0 -17 -5 66.99 41.5
 0 -17 5 37.2 58.99
 0 -17 -5 45.6 29.8
 0 -17 5 39.8 19.1
 -1 17 6 291.37 57.99
 -1 17 6 153.48 86.09
 1 -17 -6 337.97 92.89
 -1 -17 6 376.66 53.19
 1 -17 -6 261.97 62.79
 -1 -17 6 325.27 71.39
 1 -17 -6 359.86 75.29
 -1 -17 6 245.88 86.39
 -2 17 7 8.8 6.3
 -2 17 7 11.4 21
 2 -17 -7 26.1 39.6
 -2 -17 7 36.4 70.49
 -2 -17 7 76.99 39.2
 2 -17 -7 -11.4 26.2
 -3 17 8 609.94 85.39
 -3 -17 8 611.24 150.08
 3 -17 -8 691.93 111.49
 3 -17 -8 507.75 130.19
 -3 -17 8 711.33 108.09
 -4 17 9 -3 13.9
 -4 17 9 6 29.1
 -4 -17 9 28 85.59
 4 -17 -9 44.7 44.4
 -4 -17 9 14.2 17.7
 4 -17 -9 44.9 48.2
 -4 -17 9 26.1 17
 -5 17 10 84.79 40.9
 -5 -17 10 45.6 30.6
 5 -17 -10 54.89 51.09
 -5 -17 10 36.7 87.29
 5 -17 -10 144.29 56.79
 5 18 0 -30.5 51.99
 5 -18 0 -56.49 59.59
 5 -18 0 66.69 37.9
 -5 -18 0 18.7 19.4
 5 -18 0 28.3 24.9
 -5 -18 0 8.7 85.89
 -5 -18 0 10 17.3
 4 18 1 -27.3 50.29
 -4 -18 -1 10.9 16.6
 4 -18 1 10.3 20.4
 -4 -18 -1 21 42.2
 4 -18 1 18.8 34.3
 3 18 2 -2.4 50.39
 3 -18 2 58.99 30.6
 3 -18 2 50.79 27.5
 3 -18 2 -2.6 57.19
 -3 -18 -2 79.49 32.7
 -3 -18 -2 40.1 21
 2 18 3 105.99 70.99
 2 -18 3 255.27 54.59
 2 -18 3 283.37 50.79
 -2 -18 -3 251.87 61.19
 2 -18 3 141.09 75.09
 -2 -18 -3 218.68 54.79
 -1 -18 -4 315.77 81.99
 1 -18 4 240.98 97.49
 -1 -18 -4 310.47 70.49
 1 -18 4 383.76 59.29
 0 18 5 241.48 106.19
 0 -18 5 417.26 128.09
 0 -18 -5 373.66 90.89
 0 -18 -5 722.63 117.69
 0 -18 5 563.14 74.19
 -1 18 6 71.69 68.39
 -1 18 6 181.18 44.8
 1 -18 -6 284.67 53.29
 1 -18 -6 218.58 54.69
 -1 -18 6 176.18 44.5
 1 -18 -6 137.89 52.19
 -2 18 7 4.9 22.7
 -2 -18 7 59.09 67.39
 2 -18 -7 15.8 29
 -2 -18 7 9.4 35.3
 2 -18 -7 -22.5 35.9
 -3 18 8 14.7 25.3
 -3 -18 8 12.6 26.3
 3 -18 -8 22.2 46.5
 3 -18 -8 68.09 40.8
 -3 -18 8 -85.59 64.69
 -4 18 9 114.79 43.2
 -4 -18 9 74.69 27.8
 -4 -18 9 11.1 83.99
 4 -18 -9 81.89 51.99
 4 -18 -9 -3.6 49.5
 -4 -18 9 130.99 35.9
 4 19 1 395.56 127.19
 4 -19 1 455.15 91.39
 -4 -19 -1 498.55 82.69
 -4 -19 -1 334.57 77.39
 4 -19 1 485.35 79.99
 -4 -19 -1 476.85 143.29
 3 19 2 7 57.49
 -3 -19 -2 6.2 23.5
 3 -19 2 16.1 59.29
 3 -19 2 34.7 25
 -3 -19 -2 -8.3 15.1
 3 -19 2 14.7 30
 2 19 3 54.39 66.59
 2 -19 3 181.68 43.2
 2 -19 3 22.7 59.79
 -2 -19 -3 122.09 41.7
 2 -19 3 125.59 40.1
 -2 -19 -3 110.79 36.6
 1 19 4 14.1 61.49
 -1 -19 -4 -11.9 26.8
 1 -19 4 -19.5 50.19
 1 -19 4 -2 15.2
 -1 -19 -4 8.9 23.9
 0 19 5 -9.7 60.49
 0 -19 -5 -2.7 34.3
 0 -19 -5 2.2 28.2
 0 -19 5 27.8 16.6
 0 -19 5 47.9 59.29
 -1 19 6 13.4 57.99
 -1 19 6 5.2 22.2
 1 -19 -6 23.8 24.1
 -1 -19 6 32.5 12.9
 -1 -19 6 53.49 34.6
 -1 -19 6 26.1 44.4
 -1 -19 6 102.59 21.8
 1 -19 -6 38.5 43
 1 -19 -6 61.89 35.8
 -2 19 7 512.05 88.59
 -2 -19 7 616.04 119.09
 2 -19 -7 609.04 129.79
 -2 -19 7 470.15 100.19
 2 -19 -7 465.75 94.09
 -2 -19 7 547.85 139.09
 -3 19 8 98.99 41.7
 -3 -19 8 142.89 96.69
 3 -19 -8 91.79 45.2
 3 -19 -8 153.78 95.39
 -3 -19 8 102.49 42.3
 -4 19 9 121.39 49.99
 4 -19 -9 211.08 75.79
 -4 -19 9 405.56 123.89
 -4 -19 9 292.37 50.29
 4 -19 -9 125.49 58.59
 4 20 1 -84.69 53.89
 4 -20 1 -2 20.2
 4 -20 1 11.3 57.29
 -4 -20 -1 -9.6 82.59
 4 -20 1 -0.8 33.8
 -4 -20 -1 -9.9 20.1
 -4 -20 -1 -4.3 21.6
 -3 -20 -2 31.1 23.2
 3 -20 2 70.79 37.2
 3 -20 2 31.1 23.5
 -3 -20 -2 65.89 32.6
 3 -20 2 27.5 63.79
 2 20 3 23.6 70.49
 2 -20 3 82.29 34.6
 2 -20 3 93.79 34.3
 2 -20 3 21.9 59.29
 -2 -20 -3 50.79 33.1
 -2 -20 -3 105.59 34.9
 1 20 4 78.79 78.89
 -1 -20 -4 327.57 78.09
 -1 -20 -4 517.75 95.39
 1 -20 4 249.38 94.69
 0 20 5 34.2 61.29
 0 -20 -5 57.69 45
 0 -20 -5 49.9 29.9
 0 -20 5 73.29 22.8
 0 -20 5 77.99 75.19
 -1 -20 6 178.88 96.99
 -1 -20 6 191.28 77.89
 -1 -20 6 356.06 45.6
 -1 -20 6 400.36 50.39
 -1 -20 6 224.38 60.49
 1 -20 -6 227.98 79.59
 1 -20 -6 296.47 70.19
 -2 -20 7 61.39 79.29
 2 -20 -7 -10.8 29
 -2 -20 7 -22.5 32.1
 -2 -20 7 -3.3 25.6
 -3 20 8 50.59 35.1
 -3 -20 8 14.4 29.7
 3 -20 -8 -1.7 44.8
 3 -20 -8 70.79 49.8
 3 21 2 171.28 88.29
 3 -21 2 279.77 68.29
 -3 -21 -2 272.57 72.89
 -3 -21 -2 241.38 57.69
 3 -21 2 268.47 54.99
 3 -21 2 174.98 94.59
 2 21 3 36.6 77.09
 2 -21 3 80.19 26.1
 2 -21 3 28.2 35.5
 -2 -21 -3 49.99 38.4
 2 -21 3 -29.2 70.09
 -2 -21 -3 78.39 41.2
 1 21 4 63.59 72.09
 -1 -21 -4 -6.5 31.8
 1 -21 4 7.9 61.19
 -1 -21 -4 -0.5 34.5
 1 -21 4 34.5 18.7
 0 21 5 -58.69 69.19
 0 -21 -5 59.69 49.4
 0 -21 5 88.79 74.59
 0 -21 -5 17.3 28.9
 0 -21 5 150.98 27.7
 -1 -21 6 135.69 72.39
 -1 -21 6 128.19 87.19
 -1 -21 6 214.98 49.8
 -1 -21 6 178.78 31.7
 1 -21 -6 141.09 112.89
 1 -21 -6 121.59 49.3
 -2 21 7 104.99 43.3
 -2 -21 7 226.78 36.3
 -2 -21 7 149.19 58.79
 -2 -21 7 140.29 49
 2 -21 -7 131.59 64.99
 -2 -21 7 67.69 82.59
 2 -21 -7 173.38 86.49
 -3 21 8 375.16 88.59
 3 -21 -8 510.15 95.09
 -3 -21 8 316.47 121.49
 -3 -21 8 470.55 93.69
 -3 -21 8 370.36 89.39
 3 22 2 5.6 56.29
 3 -22 2 43.8 30.1
 3 -22 2 24.9 24.5
 -3 -22 -2 14.8 27.9
 -3 -22 -2 -39.1 23.4
 2 22 3 30.3 67.59
 2 -22 3 198.28 42.2
 2 -22 3 183.08 49.2
 -2 -22 -3 176.68 54.49
 -2 -22 -3 97.79 43.2
 2 -22 3 24 68.79
 1 22 4 65.09 74.19
 -1 -22 -4 50.29 49.2
 -1 -22 -4 -29 32.3
 1 -22 4 -0.7 14.8
 0 -22 -5 470.25 87.39
 0 -22 -5 363.16 108.29
 0 -22 5 233.78 94.09
 1 -22 -6 -51.79 24.7
 -1 -22 6 -6.3 9.7
 -1 -22 6 -49.3 66.19
 -1 -22 6 6.7 27.9
 1 -22 -6 17.8 50.19
 -1 -22 6 91.49 59.69
 -2 -22 7 10.5 72.19
 -2 -22 7 42.4 15.3
 2 -22 -7 -23.6 59.89
 2 -22 -7 59.79 42.2
 -2 -22 7 -15.8 34
 -2 -22 7 24.8 32.5
 2 -23 3 53.19 38.9
 -2 -23 -3 105.79 43.9
 -2 -23 -3 83.29 36.7
 -1 -23 -4 -4 35.4
 1 -23 4 -6.1 67.89
 -1 -23 -4 -52.59 30.3
 0 -23 -5 45.6 48
 0 -23 5 178.58 114.79
 0 -23 -5 102.09 44.2
 -1 -23 6 143.59 69.59
 -1 -23 6 104.99 133.29
 1 -23 -6 123.39 46.9
 -8 0 2 408.86 66.59
 -8 0 2 345.77 82.09
 8 0 -2 261.07 55.29
 7 0 -1 -19.9 14.3
 7 0 -1 4.6 11.6
 -7 0 1 10.1 31.9
 -7 0 1 -4.4 10.5
 -6 0 0 302.27 49.7
 -6 0 0 245.68 65.39
 6 0 0 264.87 55.99
 6 0 0 246.78 43
 -5 0 -1 7.6 8.1
 5 0 1 -1.6 18.6
 5 0 1 5.9 8.2
 -5 0 -1 -1.8 26.2
 4 0 2 225.68 47
 -4 0 -2 187.28 36.9
 4 0 2 282.57 35.5
 -3 0 -3 -22.5 27.3
 -3 0 -3 0.8 5.8
 3 0 3 -35.8 17.6
 -3 0 -3 -9.1 3.9
 -2 0 -4 7504.05 982.3
 -2 0 -4 7193.98 977.7
 2 0 4 7657.33 978.1
 2 0 4 8363.46 981.7
 1 0 5 -1.9 2.3
 1 0 5 8 10.1
 -1 0 -5 -0.4 1.9
 -1 0 -5 1.4 9.4
 0 0 -6 86.99 26.6
 0 0 -6 97.69 20.7
 0 0 6 300.77 48.4
 0 0 6 112.39 20.8
 1 0 -7 7.4 12.9
 -1 0 7 47.8 23.8
 -1 0 7 -9.4 6.6
 1 0 -7 -1.9 15.7
 2 0 -8 591.74 77.99
 -2 0 8 920.81 115.29
 -2 0 8 500.05 88.59
 2 0 -8 744.43 99.69
 -3 0 9 11.3 22.2
 -3 0 9 -11.3 17.8
 3 0 -9 -23.1 20.6
 3 0 -9 0.5 4.1
 -3 0 9 -12.1 17.3
 4 0 -10 2022 318.17
 -4 0 10 2521.85 328.17
 -4 0 10 2386.36 303.07
 -4 0 10 2407.16 313.07
 4 0 -10 2222.48 295.97
 -5 0 11 -53.49 25.6
 -5 0 11 -18.3 23.8
 5 0 -11 -4.3 8.8
 5 0 -11 9.9 49.9
 -5 0 11 27.8 20.3
 -6 0 12 142.79 52.39
 6 0 -12 170.08 68.99
 -6 0 12 127.99 55.39
 -6 0 12 142.39 39.6
 6 0 -12 100.79 24.5
 -7 0 13 51.29 36.5
 -7 0 13 0.2 39
 7 0 -13 38.6 61.29
 7 0 -13 -26.7 13.1
 -7 0 13 5.7 44.6
 -8 1 2 -0.9 14.2
 8 1 -2 -5.7 16.3
 -8 1 2 11.4 31
 -8 -1 2 -18.1 13.6
 -8 -1 2 54.69 42.6
 8 -1 -2 -17.3 12.6
 7 1 -1 175.28 37.7
 7 1 -1 79.99 23.1
 -7 1 1 92.29 25.8
 -7 1 1 83.59 40.4
 -7 -1 1 85.99 43
 7 -1 -1 84.89 30.3
 -7 -1 1 149.69 35.1
 7 -1 -1 95.49 23.6
 -6 1 0 359.56 73.69
 -6 1 0 355.86 59.49
 6 1 0 384.86 55.09
 6 1 0 295.77 63.39
 -6 -1 0 422.16 62.29
 -6 -1 0 367.76 76.39
 6 -1 0 267.37 84.89
 6 -1 0 345.17 53.19
 -5 1 -1 629.94 113.19
 5 1 1 705.63 100.89
 -5 1 -1 842.02 106.39
 5 1 1 909.11 110.49
 5 -1 1 717.33 99.99
 -5 -1 -1 773.92 106.49
 5 -1 1 640.04 129.99
 -5 -1 -1 761.42 119.49
 5 -1 1 655.93 109.99
 4 1 2 539.15 80.79
 4 1 2 506.05 71.19
 -4 1 -2 454.75 81.09
 -4 1 -2 569.44 74.99
 -4 -1 -2 639.44 93.19
 -4 -1 -2 508.25 74.69
 4 -1 2 572.14 70.89
 4 -1 2 472.85 80.49
 4 -1 2 399.86 92.09
 -4 -1 -2 504.85 69.49
 3 1 3 307.57 70.49
 3 1 3 406.96 56.99
 -3 1 -3 451.05 60.19
 -3 1 -3 367.86 68.09
 -3 -1 -3 504.95 61.49
 3 -1 3 455.75 56.49
 -3 -1 -3 415.46 55.69
 -3 -1 -3 300.67 75.89
 3 -1 3 310.07 74.29
 -2 1 -4 -0.7 9.8
 2 1 4 10 6.3
 -2 1 -4 9.6 8.6
 2 1 4 4.1 4.4
 -2 -1 -4 2.3 3.1
 2 -1 4 8.5 5.8
 -2 -1 -4 10.3 7
 2 -1 4 4.7 3.1
 1 1 5 1026.3 137.79
 -1 1 -5 1152.88 137.49
 1 1 5 1081.19 145.89
 -1 -1 -5 1019.9 144.59
 1 -1 5 1101.19 137.39
 1 -1 5 1044.3 142.99
 -1 -1 -5 1028.6 137.39
 0 1 6 293.37 72.59
 0 1 6 246.28 37.6
 0 1 -6 255.77 38.3
 0 1 -6 211.58 53.29
 0 -1 -6 254.77 33.3
 0 -1 6 257.97 37.5
 0 -1 -6 209.98 50.69
 0 -1 6 235.58 55.49
 0 -1 -6 291.57 38.1
 1 1 -7 312.27 57.39
 1 1 -7 321.87 51.39
 -1 1 7 304.47 46.8
 -1 1 7 197.88 50.09
 -1 1 7 286.67 45.4
 1 -1 -7 228.28 62.09
 -1 -1 7 532.75 72.99
 1 -1 -7 243.68 48.6
 -1 -1 7 268.57 55.19
 2 1 -8 547.85 70.79
 -2 1 8 496.75 103.39
 -2 1 8 502.85 84.79
 -2 1 8 607.74 86.39
 2 -1 -8 461.75 88.19
 -2 -1 8 631.44 116.39
 2 -1 -8 541.05 69.79
 3 1 -9 675.03 103.59
 -3 1 9 525.35 102.49
 -3 1 9 614.64 93.19
 3 1 -9 566.14 80.09
 3 -1 -9 533.65 96.49
 -3 -1 9 595.44 94.89
 3 -1 -9 651.93 84.09
 3 -1 -9 619.84 79.49
 -3 -1 9 650.23 109.49
 4 1 -10 1.8 40.5
 4 1 -10 44.3 12.6
 -4 1 10 -6.1 28.4
 -4 1 10 134.19 38.5
 -4 -1 10 29.2 37.1
 4 -1 -10 75.09 22.2
 -4 -1 10 24.7 15.4
 4 -1 -10 49.6 11.4
 4 -1 -10 79.99 45.3
 -5 1 11 26.9 31.4
 -5 1 11 8.9 20.3
 5 1 -11 16.8 47.7
 5 1 -11 16.6 11.5
 -5 1 11 26 35.5
 -5 -1 11 19.3 38.7
 -5 -1 11 -2.7 18.5
 5 -1 -11 -57.19 39.5
 5 -1 -11 15.9 10.2
 5 -1 -11 -2.4 7.6
 6 1 -12 144.79 72.39
 -6 1 12 199.18 49.6
 6 1 -12 170.08 36.4
 -6 1 12 127.69 51.89
 -6 1 12 173.58 55.59
 -6 -1 12 189.98 61.19
 6 -1 -12 155.58 76.89
 6 -1 -12 193.28 33.4
 -6 -1 12 249.48 55.89
 7 1 -13 183.98 44.2
 -7 1 13 280.87 90.79
 -7 1 13 313.37 85.09
 -7 1 13 208.08 67.59
 7 1 -13 185.08 83.89
 -7 -1 13 240.48 82.19
 -7 -1 13 470.75 89.69
 -7 -1 13 360.66 72.39
 7 -1 -13 162.98 41.3
 7 -1 -13 232.08 91.59
 -8 2 2 118.29 42.2
 8 2 -2 12.7 21.4
 -8 2 2 54.39 23.4
 8 -2 -2 50.89 26.3
 -8 -2 2 55.09 24
 -8 -2 2 155.68 51.69
 8 -2 -2 57.49 22.6
 -7 2 1 320.77 75.89
 -7 2 1 457.95 67.69
 7 2 -1 420.06 67.39
 7 2 -1 322.47 60.99
 -7 -2 1 436.96 87.89
 7 -2 -1 433.36 70.89
 7 -2 -1 350.56 59.29
 7 -2 -1 323.97 96.29
 -7 -2 1 426.76 69.59
 6 2 0 0.8 10.5
 -6 2 0 19 27.8
 -6 2 0 0.9 10.3
 -6 -2 0 17.3 13.4
 6 -2 0 18.5 22
 -6 -2 0 1.7 33.2
 6 -2 0 -112.59 38.9
 6 -2 0 19.9 9.9
 -5 2 -1 28.7 11.7
 5 2 1 13.4 9.9
 -5 2 -1 11.4 25.9
 5 2 1 17.8 17.9
 5 -2 1 25.8 9.7
 5 -2 1 43.6 42.5
 -5 -2 -1 17.3 37.5
 -5 -2 -1 24.4 7.4
 5 -2 1 36.6 22.6
 -5 -2 -1 22.9 12.4
 -4 2 -2 93.99 19.6
 -4 2 -2 62.19 25.9
 4 2 2 72.59 17.3
 4 2 2 85.29 25
 -4 -2 -2 95.39 21.5
 -4 -2 -2 89.59 40.4
 -4 -2 -2 74.99 15.3
 4 -2 2 53.39 37.9
 4 -2 2 86.59 16.9
 -3 2 -3 1872.31 235.18
 3 2 3 1528.95 237.08
 -3 2 -3 1863.41 233.88
 3 2 3 1747.73 231.08
 -3 -2 -3 1887.61 230.18
 -3 -2 -3 2076.39 235.58
 3 -2 3 1637.54 239.28
 -3 -2 -3 1606.34 243.58
 3 -2 3 1954.2 230.28
 3 -2 3 1485.05 239.08
 -2 2 -4 1329.27 176.08
 2 2 4 1456.25 179.18
 -2 2 -4 1392.56 179.68
 2 2 4 1307.57 175.88
 2 -2 4 1279.67 174.78
 -2 -2 -4 1372.16 180.18
 2 -2 4 1517.15 178.38
 -2 -2 -4 1284.07 175.08
 -1 2 -5 2468.95 372.56
 1 2 5 2992.5 371.66
 -1 -2 -5 3047.7 373.66
 1 -2 5 2890.21 371.46
 -1 -2 -5 2934.41 366.76
 0 2 -6 211.58 34.6
 0 2 6 218.48 34.6
 0 2 6 187.18 47.8
 0 -2 6 222.78 32.4
 0 -2 -6 213.68 32.6
 0 -2 -6 176.78 46.5
 -1 2 7 -8.4 11.7
 -1 2 7 0.2 17
 1 2 -7 -28.8 15.4
 1 -2 -7 8.9 8.4
 1 -2 -7 4.9 20.8
 1 -2 -7 33.7 16.3
 -1 -2 7 1.8 2
 -1 -2 7 -25.7 16.4
 -1 -2 7 12 20.1
 2 2 -8 -53.49 30.1
 -2 2 8 12.9 31.5
 -2 2 8 -0.9 24.1
 -2 2 8 57.89 27.6
 -2 -2 8 -44.9 22.8
 -2 -2 8 -33.7 20.6
 2 -2 -8 -1.7 3
 2 -2 -8 3.8 12
 -2 -2 8 1.2 2.9
 2 -2 -8 35.9 27.7
 -2 -2 8 18.3 9.6
 3 2 -9 905.31 129.49
 -3 2 9 1040.3 140.69
 3 2 -9 721.23 146.09
 -3 2 9 917.71 152.08
 3 -2 -9 1078.19 135.19
 -3 -2 9 1026.9 156.98
 3 -2 -9 976.8 145.39
 -3 -2 9 1084.29 128.69
 -3 -2 9 1099.09 146.59
 3 -2 -9 973.5 128.59
 -4 2 10 22.1 35
 4 2 -10 135.69 60.69
 -4 2 10 130.79 41.7
 4 2 -10 98.29 20.5
 -4 2 10 104.59 26.6
 -4 -2 10 119.09 48.2
 4 -2 -10 121.99 32.4
 4 -2 -10 96.39 51.09
 -4 -2 10 144.09 32.8
 4 -2 -10 101.19 18.4
 5 2 -11 377.26 113.99
 -5 2 11 618.14 92.49
 -5 2 11 652.03 123.09
 -5 2 11 580.24 101.89
 5 2 -11 492.35 79.89
 5 -2 -11 604.84 83.79
 5 -2 -11 626.14 78.59
 5 -2 -11 527.85 120.29
 -5 -2 11 616.94 107.99
 -6 2 12 4.2 35.2
 -6 2 12 38.7 32
 -6 2 12 20.3 25.7
 6 2 -12 57.69 63.69
 6 -2 -12 54.39 14.8
 -6 -2 12 57.29 27
 6 -2 -12 35.4 14.3
 6 -2 -12 26.2 52.19
 -6 -2 12 4.1 36.2
 -7 2 13 32.2 51.89
 -7 2 13 20.6 29.7
 7 2 -13 -72.69 51.49
 -7 2 13 29.3 44.4
 -7 -2 13 15.6 44
 7 -2 -13 -76.89 50.29
 7 -2 -13 -7.5 11.5
 -7 -2 13 18.3 46.8
 -7 -2 13 4.4 24.6
 -8 3 2 33.3 34.6
 8 3 -2 33.9 19
 8 -3 -2 -28.9 53.49
 -8 -3 2 -8.4 14.4
 8 -3 -2 29.3 23.9
 -7 3 1 44.2 33
 7 3 -1 52.09 24.7
 7 3 -1 29.8 16.9
 -7 3 1 23.5 14.4
 7 -3 -1 8.1 10.9
 7 -3 -1 22.7 21.2
 -7 -3 1 6.6 13.3
 -7 -3 1 16.2 38.7
 7 -3 -1 44.2 60.09
 -6 3 0 105.59 27.3
 -6 3 0 118.69 36.1
 6 3 0 116.49 26.4
 6 3 0 138.99 35.9
 -6 -3 0 82.79 19.3
 -6 -3 0 127.19 31.3
 6 -3 0 127.39 23.8
 6 -3 0 107.99 34.7
 6 -3 0 46.7 54.59
 5 3 1 75.39 24.2
 -5 3 -1 60.39 18
 5 3 1 74.69 19.6
 -5 3 -1 80.09 30.3
 -5 -3 -1 95.29 16.8
 -5 -3 -1 103.69 25.2
 -5 -3 -1 54.19 45.8
 5 -3 1 71.99 16.7
 5 -3 1 57.99 45.7
 5 -3 1 87.39 31
 4 3 2 1987.8 259.87
 -4 3 -2 2224.38 262.77
 -4 3 -2 2140.99 264.57
 4 3 2 1896.91 264.17
 4 -3 2 1607.64 270.47
 -4 -3 -2 2224.88 264.77
 -4 -3 -2 1756.12 275.37
 4 -3 2 2032.9 258.27
 4 -3 2 1892.91 267.67
 -4 -3 -2 2037.9 258.27
 -3 3 -3 8.7 6.8
 -3 3 -3 -5.2 12.2
 3 3 3 12.1 8
 3 3 3 38.5 19.9
 3 -3 3 20.2 6.3
 -3 -3 -3 7.4 6.1
 -3 -3 -3 4.1 4.6
 3 -3 3 -10 15.8
 3 -3 3 -13.5 20.3
 -3 -3 -3 42.3 35.9
 0 3 -6 2359.56 332.27
 0 3 6 2750.12 334.27
 0 3 6 2589.04 336.07
 0 -3 6 2860.51 331.57
 0 -3 6 2442.26 337.37
 0 -3 -6 2297.37 336.77
 1 3 -7 72.59 27.1
 -1 3 7 120.69 31.7
 -1 3 7 37.1 18.8
 -1 3 7 151.18 24.5
 1 -3 -7 75.79 20.9
 1 -3 -7 47.2 27.1
 1 -3 -7 72.99 22.5
 -1 -3 7 103.69 31.6
 -2 3 8 3489.25 396.56
 -2 3 8 2614.94 381.16
 -2 3 8 2404.86 385.46
 -2 -3 8 3193.68 389.06
 2 -3 -8 2743.33 385.36
 -2 -3 8 3338.67 376.26
 -2 -3 8 2885.51 374.16
 2 -3 -8 2954.5 381.46
 -2 -3 8 2862.61 394.56
 -3 3 9 324.47 46.5
 -3 3 9 363.86 77.59
 3 3 -9 424.16 77.59
 -3 3 9 288.07 51.79
 -3 3 9 182.98 54.49
 3 -3 -9 421.16 63.59
 -3 -3 9 265.97 35.3
 3 -3 -9 178.68 45.3
 3 -3 -9 234.28 35.1
 -3 -3 9 421.46 64.29
 -4 3 10 40.8 28.9
 4 3 -10 -48 42.8
 -4 3 10 33.2 34.9
 -4 3 10 -3.7 13.3
 -4 -3 10 -8.7 33.2
 4 -3 -10 27.8 37.1
 -4 -3 10 0.5 4.6
 4 -3 -10 24.5 16.8
 5 3 -11 24.5 52.29
 -5 3 11 51.49 37.5
 -5 3 11 18.2 32.5
 -5 3 11 46.7 23.2
 5 -3 -11 27 19.1
 5 -3 -11 119.79 55.39
 5 -3 -11 69.59 14.1
 -5 -3 11 126.59 49.9
 -5 -3 11 102.59 29.9
 6 3 -12 194.38 83.09
 -6 3 12 300.17 78.39
 -6 3 12 350.16 76.09
 -6 3 12 288.07 67.99
 6 -3 -12 302.77 46.7
 -6 -3 12 424.96 68.99
 6 -3 -12 237.38 84.29
 6 -3 -12 306.97 52.99
 -6 -3 12 408.06 88.49
 -7 3 13 47.5 45.7
 7 3 -13 -7.9 66.09
 -7 3 13 40.6 36
 -7 -3 13 110.99 55.29
 7 -3 -13 41.6 16.9
 -7 -3 13 17.4 30.4
 7 -3 -13 -9.5 59.99
 7 -3 -13 54.99 17.3
 8 4 -2 307.67 56.79
 -8 4 2 400.26 63.39
 8 -4 -2 363.36 85.09
 8 -4 -2 134.19 88.49
 7 4 -1 71.59 23.7
 -7 4 1 131.79 44.1
 -7 4 1 55.09 21.1
 7 4 -1 91.39 26.4
 7 4 -1 152.28 37.3
 -7 -4 1 82.39 48.5
 7 -4 -1 97.29 34
 7 -4 -1 153.88 26.4
 -7 -4 1 79.79 28.4
 7 -4 -1 84.99 65.69
 -6 4 0 32.9 27
 6 4 0 29.6 14.2
 -6 4 0 32 14.7
 6 4 0 17.2 15.3
 -6 -4 0 16.8 11.6
 6 -4 0 20.1 9.6
 6 -4 0 32.5 43.9
 -6 -4 0 23.5 9.4
 6 -4 0 40.9 24.4
 -6 -4 0 45.3 42.6
 5 4 1 -7.4 13.4
 -5 4 -1 -4.1 5.7
 -5 4 -1 -18.7 18.4
 5 4 1 20.9 16
 5 -4 1 -10.7 17.1
 -5 -4 -1 0.6 12.3
 -5 -4 -1 23.6 38.8
 5 -4 1 -5.6 35.9
 5 -4 1 1.9 8.4
 4 4 2 815.82 102.09
 4 4 2 601.54 95.99
 -4 4 -2 767.42 98.09
 -4 4 -2 806.42 100.89
 -4 -4 -2 729.03 100.09
 4 -4 2 684.73 93.79
 4 -4 2 614.04 110.89
 -4 -4 -2 624.54 123.19
 -4 -4 -2 734.13 94.29
 4 -4 2 582.64 105.99
 -3 4 -3 619.44 85.39
 -3 4 -3 605.64 84.19
 3 4 3 517.95 89.09
 3 -4 3 667.23 81.89
 3 -4 3 600.74 94.89
 3 -4 3 596.74 90.49
 -3 -4 -3 669.13 82.79
 -3 -4 -3 693.23 87.69
 -3 -4 -3 481.25 103.69
 2 4 4 2524.25 299.17
 2 4 4 2243.58 296.57
 -2 -4 -4 1964 293.07
 -2 -4 -4 2266.57 297.97
 2 -4 4 2426.36 294.97
 1 4 5 298.97 43.6
 1 4 5 326.67 47.2
 -1 4 -5 264.97 49.9
 1 -4 5 251.07 38.3
 -1 -4 -5 257.97 47.7
 1 -4 5 342.67 46.8
 0 4 -6 426.66 110.19
 0 4 6 528.85 86.49
 0 4 6 731.13 90.39
 0 -4 6 561.44 83.79
 0 -4 6 573.84 91.89
 0 -4 -6 639.74 84.49
 0 -4 -6 633.74 96.39
 -2 4 8 59.79 37.3
 -2 4 8 73.49 41.5
 2 -4 -8 230.58 42
 -2 -4 8 138.69 20.7
 -2 -4 8 71.39 44.1
 2 -4 -8 192.38 48
 -2 -4 8 147.99 42.2
 3 4 -9 -6.5 37.5
 -3 4 9 40.2 16.7
 -3 4 9 9.8 34.3
 -3 4 9 67.39 32.2
 3 -4 -9 31.5 20.2
 -3 -4 9 40.6 34.5
 -3 -4 9 60.09 11.2
 3 -4 -9 52.69 29.2
 3 -4 -9 63.79 10.2
 4 4 -10 846.82 190.78
 -4 4 10 1238.88 177.18
 -4 4 10 1267.77 195.68
 -4 4 10 1213.08 170.68
 4 -4 -10 1182.58 186.38
 -4 -4 10 1295.17 161.58
 -4 -4 10 1215.68 187.78
 -4 -4 10 1458.25 170.38
 4 -4 -10 1209.78 161.38
 4 -4 -10 1265.07 173.98
 -5 4 11 439.56 105.59
 5 4 -11 402.06 101.89
 -5 4 11 391.66 80.69
 -5 4 11 410.76 72.09
 5 -4 -11 366.76 55.89
 5 -4 -11 365.96 95.39
 -5 -4 11 427.36 71.19
 -5 -4 11 464.65 55.99
 -5 -4 11 467.45 93.89
 5 -4 -11 344.87 70.29
 -6 4 12 83.99 51.79
 -6 4 12 189.28 55.79
 -6 4 12 176.38 49.9
 6 4 -12 98.39 67.39
 6 -4 -12 209.18 31.9
 -6 -4 12 204.68 66.99
 -6 -4 12 241.28 56.89
 6 -4 -12 294.07 82.09
 6 -4 -12 186.58 45.1
 -7 4 13 -1 38.2
 -7 4 13 -18.2 53.79
 7 4 -13 36.9 69.89
 -7 4 13 13.7 25.9
 -7 -4 13 31.1 31.3
 7 -4 -13 -74.79 59.19
 7 -4 -13 -8.4 10.3
 -7 -4 13 61.69 51.29
 7 -4 -13 9.3 10.3
 -7 5 1 50.89 17.7
 -7 5 1 51.29 33.4
 7 5 -1 61.89 22.1
 7 -5 -1 16.5 55.09
 7 -5 -1 49.6 30.8
 -7 -5 1 27.5 17.3
 7 -5 -1 52.19 15.4
 -7 -5 1 38.7 12.9
 -7 -5 1 72.29 50.09
 -6 5 0 3.7 8.7
 6 5 0 25.4 15.7
 -6 5 0 12.9 22.7
 6 5 0 12.2 15.8
 6 -5 0 0.2 21.1
 -6 -5 0 -2.2 6.5
 -6 -5 0 -6.6 39.6
 6 -5 0 18.8 46.8
 -6 -5 0 19.1 12.9
 6 -5 0 22.4 10.8
 5 5 1 1158.18 147.79
 -5 5 -1 1155.98 145.39
 -5 5 -1 1049.4 147.69
 5 5 1 1111.29 145.99
 -5 -5 -1 1010.1 140.19
 5 -5 1 991.6 140.09
 -5 -5 -1 1174.58 149.59
 5 -5 1 1100.69 157.38
 -5 -5 -1 904.71 167.78
 5 -5 1 843.72 159.98
 -4 5 -2 -1.3 15.2
 4 5 2 7.6 12.7
 4 5 2 -4.9 12.9
 -4 5 -2 13.7 7.4
 4 -5 2 17.2 7.5
 4 -5 2 -22 17.1
 -4 -5 -2 12.6 6.8
 -4 -5 -2 40.6 41.8
 4 -5 2 43.5 30.7
 -4 -5 -2 4.4 6.4
 3 5 3 604.94 97.29
 -3 5 -3 681.93 94.99
 -3 5 -3 716.63 93.09
 3 -5 3 784.12 99.89
 3 -5 3 553.34 102.59
 -3 -5 -3 746.43 92.79
 -3 -5 -3 512.95 114.49
 -3 -5 -3 842.92 98.69
 2 5 4 -8.7 12.3
 -2 -5 -4 10 9.3
 2 -5 4 0.9 4.7
 2 -5 4 -17.6 9.6
 -1 5 -5 328.07 56.09
 1 5 5 311.87 54.29
 1 5 5 340.77 49.3
 1 -5 5 370.86 52.29
 1 -5 5 295.97 50.09
 -1 -5 -5 365.16 55.19
 0 5 6 -2.9 11
 0 5 6 -1.7 10.4
 0 -5 -6 -1.9 7.9
 0 -5 6 -1.5 12.9
 0 -5 -6 -4.6 14.8
 0 -5 -6 0.2 11
 0 -5 6 20 16.3
 -1 5 7 2514.45 317.97
 1 5 -7 2726.23 327.47
 -1 5 7 2787.12 326.27
 1 -5 -7 2985.8 333.47
 -1 -5 7 2081.39 325.97
 1 -5 -7 2070.19 317.77
 -1 -5 7 2118.69 324.17
 1 -5 -7 2509.15 321.77
 -2 5 8 208.58 73.89
 -2 5 8 580.04 79.29
 2 5 -8 320.17 77.79
 -2 -5 8 366.96 83.49
 2 -5 -8 511.85 69.89
 2 -5 -8 388.16 67.19
 -2 -5 8 331.37 76.89
 -3 5 9 1064.89 138.19
 -3 5 9 763.82 156.98
 -3 5 9 1063.89 142.59
 3 5 -9 827.52 157.18
 -3 -5 9 1052.79 155.18
 3 -5 -9 947.31 147.99
 -3 -5 9 1057.09 131.09
 3 -5 -9 1020.4 145.29
 4 5 -10 -22.3 46.8
 -4 5 10 -26.1 24.5
 -4 5 10 -13.4 35.2
 -4 5 10 3.5 14.8
 -4 -5 10 12.4 5.9
 4 -5 -10 -52.39 27.9
 -4 -5 10 69.89 46
 -4 -5 10 -16 11.3
 4 -5 -10 6.8 18.4
 4 -5 -10 -5.1 4.3
 -5 5 11 29.4 22.5
 -5 5 11 10.3 28.5
 5 5 -11 -33.9 46.6
 -5 5 11 36.5 63.79
 -5 -5 11 45.2 45.3
 5 -5 -11 15.6 8.2
 5 -5 -11 62.89 56.09
 -5 -5 11 4.2 19.8
 -5 -5 11 44 10.3
 5 -5 -11 57.59 25.7
 -6 5 12 23.9 38.7
 -6 5 12 14.6 31.4
 6 5 -12 -17.9 48
 -6 5 12 -3.2 21.4
 6 -5 -12 -10.2 17.6
 -6 -5 12 29.9 25.1
 -6 -5 12 11 40.1
 6 -5 -12 5.8 7.9
 6 -5 -12 -5.1 52.79
 -7 5 13 203.48 61.09
 -7 5 13 171.98 72.29
 -7 5 13 186.18 58.69
 7 5 -13 114.59 80.19
 7 -5 -13 270.37 47.3
 -7 -5 13 248.78 77.69
 -7 -5 13 370.86 72.29
 7 -5 -13 249.97 40.4
 7 -5 -13 139.79 84.49
 -7 6 1 70.19 25.1
 7 6 -1 141.89 35.1
 -7 6 1 129.39 38.6
 7 -6 -1 131.89 38.4
 7 -6 -1 109.99 67.49
 -7 -6 1 83.09 28.3
 -7 -6 1 92.89 22.1
 7 -6 -1 141.49 26.5
 -7 -6 1 132.79 65.89
 6 6 0 231.48 51.29
 6 6 0 279.37 47.9
 -6 6 0 311.77 47.7
 -6 6 0 262.57 54.19
 6 -6 0 279.97 42.1
 6 -6 0 266.07 59.79
 -6 -6 0 370.26 55.19
 -6 -6 0 196.48 75.29
 -6 -6 0 264.17 41
 6 -6 0 183.08 68.19
 -5 6 -1 63.09 17.3
 5 6 1 80.89 22.3
 5 6 1 70.69 22
 -5 6 -1 84.29 26.6
 -5 -6 -1 58.49 19.4
 5 -6 1 48.6 28.7
 -5 -6 -1 140.09 60.39
 5 -6 1 73.29 16.6
 5 -6 1 53.39 40.2
 -5 -6 -1 81.99 16.5
 4 6 2 282.37 50.99
 4 6 2 331.57 54.59
 -4 6 -2 313.57 50.19
 -4 6 -2 337.27 47.6
 4 -6 2 231.58 65.19
 4 -6 2 234.28 58.99
 -4 -6 -2 253.87 76.19
 -4 -6 -2 328.87 45.4
 -4 -6 -2 347.27 51.09
 4 -6 2 306.67 43.6
 3 6 3 465.85 82.19
 -3 6 -3 634.04 82.39
 3 6 3 694.53 87.29
 -3 6 -3 639.34 79.79
 -3 -6 -3 591.84 79.79
 -3 -6 -3 585.54 84.09
 3 -6 3 575.74 84.99
 3 -6 3 479.35 90.59
 2 6 4 1233.08 157.88
 -2 6 -4 958.8 152.58
 2 -6 4 1299.77 150.28
 -2 -6 -4 1088.19 153.88
 -2 -6 -4 1020.9 149.99
 2 -6 4 1200.38 149.49
 -1 -6 -5 908.91 126.19
 0 6 6 488.75 69.79
 0 6 6 393.16 78.29
 0 -6 6 599.74 82.19
 0 -6 -6 388.96 81.69
 0 -6 -6 448.96 70.29
 0 -6 6 467.15 76.79
 -1 6 7 58.19 30.8
 -1 6 7 -21.8 21.9
 -1 -6 7 28.7 25.1
 1 -6 -7 -5.2 18.5
 -1 -6 7 95.29 38.5
 1 -6 -7 4.9 28.4
 -2 6 8 652.03 103.69
 -2 6 8 640.04 93.39
 2 6 -8 506.75 105.49
 2 -6 -8 784.92 102.09
 2 -6 -8 676.53 96.89
 -2 -6 8 726.33 110.39
 -2 -6 8 599.54 85.89
 -3 6 9 198.08 56.59
 -3 6 9 375.16 56.49
 3 6 -9 306.07 77.69
 -3 6 9 320.57 48.8
 -3 -6 9 267.87 39.7
 3 -6 -9 258.57 61.79
 -3 -6 9 311.87 73.29
 3 -6 -9 236.18 59.29
 -4 6 10 846.92 143.39
 -4 6 10 1072.69 145.69
 -4 6 10 909.31 164.78
 4 6 -10 745.13 165.98
 -4 -6 10 1063.89 163.88
 4 -6 -10 981.2 147.99
 4 -6 -10 1025 130.39
 4 -6 -10 979.4 154.38
 -4 -6 10 1082.29 138.49
 -4 -6 10 1042.5 130.89
 -5 6 11 458.05 119.49
 -5 6 11 481.35 78.79
 5 6 -11 229.48 96.19
 -5 6 11 480.55 82.79
 -5 -6 11 471.95 60.59
 5 -6 -11 477.55 101.09
 5 -6 -11 350.86 77.09
 -5 -6 11 509.25 102.39
 5 -6 -11 447.96 60.49
 -5 -6 11 447.46 75.59
 -6 6 12 95.99 44.3
 -6 6 12 135.49 44.1
 6 6 -12 74.09 64.69
 -6 6 12 177.48 71.89
 -6 -6 12 245.68 73.79
 -6 -6 12 180.78 25.2
 6 -6 -12 101.09 35.9
 6 -6 -12 115.09 64.99
 6 -6 -12 107.89 24.9
 -6 -6 12 335.77 58.69
 -7 6 13 18.3 31.6
 -7 6 13 -14.5 53.19
 7 6 -13 -7.7 65.69
 -7 6 13 19.5 39.9
 7 -6 -13 53.99 60.09
 7 -6 -13 24.3 18
 7 -6 -13 9.7 11.8
 -7 -6 13 28.6 28.7
 -7 7 1 90.29 36.8
 7 7 -1 83.89 27.6
 -7 7 1 66.19 22.3
 7 -7 -1 70.59 47.1
 -7 -7 1 61.39 35.2
 -7 -7 1 74.49 18.3
 7 -7 -1 103.09 65.39
 7 -7 -1 86.39 83.29
 7 -7 -1 51.19 19.7
 -7 -7 1 69.89 62.79
 -6 7 0 411.36 70.39
 6 7 0 413.36 68.79
 -6 7 0 380.36 63.69
 6 7 0 450.05 64.89
 -6 -7 0 488.45 72.69
 -6 -7 0 286.37 89.69
 6 -7 0 405.76 58.99
 -6 -7 0 459.75 59.49
 6 -7 0 366.06 75.49
 6 -7 0 320.17 84.39
 -5 7 -1 4.8 8.2
 5 7 1 17.7 14.2
 -5 7 -1 10.1 17.6
 5 7 1 9.3 14.5
 5 -7 1 3.9 21
 5 -7 1 9.7 5.8
 -5 -7 -1 8.5 9.6
 5 -7 1 23.5 32.5
 -5 -7 -1 -20.9 41.8
 -5 -7 -1 5 6.5
 -4 7 -2 1337.27 173.58
 4 7 2 1368.06 178.98
 4 7 2 1207.28 173.58
 -4 7 -2 1275.47 173.08
 -4 -7 -2 988.8 198.88
 4 -7 2 1257.97 182.68
 -4 -7 -2 1474.05 172.18
 -4 -7 -2 1335.47 177.48
 4 -7 2 1352.26 183.28
 3 -7 3 0.5 14.8
 -2 7 -4 222.28 39.8
 2 7 4 128.09 39.6
 -2 -7 -4 104.49 27
 -2 -7 -4 152.28 30.1
 2 -7 4 166.78 28.4
 2 -7 4 213.88 51.39
 1 7 5 21.7 23.5
 1 7 5 18.2 8.1
 -1 7 -5 48.7 22.4
 -1 -7 -5 9.2 16
 -1 -7 -5 41.7 16.8
 0 7 6 1487.45 186.68
 0 7 6 1492.05 197.88
 0 -7 6 1441.16 193.38
 0 -7 -6 1189.08 193.48
 0 -7 6 1302.57 196.28
 1 -7 -7 305.47 70.59
 1 -7 -7 155.68 34.5
 -1 -7 7 108.39 37.5
 -2 7 8 2237.48 284.97
 -2 7 8 2329.27 283.57
 -2 7 8 1860.01 289.47
 2 -7 -8 2156.48 287.77
 -2 -7 8 2160.98 297.67
 2 -7 -8 2181.98 292.67
 -3 7 9 5.5 45.4
 -3 7 9 53.99 28.2
 -3 7 9 11.4 36.4
 -3 7 9 63.89 21.2
 3 7 -9 62.39 46.7
 -3 -7 9 50.69 12.4
 -3 -7 9 161.38 53.99
 3 -7 -9 46.1 33.5
 3 -7 -9 40 27.6
 -4 7 10 -3.2 18.2
 -4 7 10 25.2 44.7
 -4 7 10 -0.9 34.8
 4 -7 -10 30.2 45.4
 -4 -7 10 8.9 6.9
 -4 -7 10 32.6 15.4
 4 -7 -10 -18.2 20.8
 -4 -7 10 -2.9 80.89
 -5 7 11 17.9 21.2
 -5 7 11 27.2 28.6
 -5 7 11 61.19 40.9
 5 7 -11 38.9 53.69
 -5 -7 11 43.6 23.6
 5 -7 -11 39.1 40.6
 5 -7 -11 7.6 22.9
 -5 -7 11 46.7 46.5
 5 -7 -11 19.2 7.9
 -5 -7 11 17.1 8.2
 6 7 -12 81.49 86.29
 -6 7 12 332.37 86.29
 -6 7 12 362.26 76.69
 -6 7 12 317.97 70.69
 -6 -7 12 339.77 69.89
 6 -7 -12 286.37 71.49
 6 -7 -12 297.57 94.09
 -6 -7 12 282.37 87.59
 6 -7 -12 352.46 47.9
 -6 -7 12 350.66 47.3
 -7 7 13 25.5 37.1
 -7 7 13 64.09 60.89
 7 -7 -13 29.7 24.5
 7 -7 -13 28.8 12.9
 -7 -7 13 1.8 29.5
 7 -7 -13 -15.4 59.79
 -7 8 1 153.18 39.4
 7 8 -1 237.98 55.09
 -7 8 1 230.48 52.19
 -7 -8 1 201.58 33.3
 -7 -8 1 154.68 75.19
 7 -8 -1 172.98 33.9
 -7 -8 1 270.17 51.99
 7 -8 -1 150.38 68.39
 7 -8 -1 270.37 56.29
 7 -8 -1 27.2 79.69
 6 8 0 33.2 20.9
 -6 8 0 23.8 12
 -6 8 0 38.4 23.8
 6 -8 0 73.59 30.6
 6 -8 0 11.5 9
 6 -8 0 -7.2 38.5
 -6 -8 0 28.2 14.7
 -6 -8 0 29.1 11.3
 -5 8 -1 51.99 14.4
 -5 8 -1 41.1 20.4
 5 8 1 25.8 20.8
 5 8 1 35.3 15.5
 5 -8 1 37.3 26.8
 -5 -8 -1 37.6 55.69
 5 -8 1 28.8 8.6
 5 -8 1 69.19 38.6
 -5 -8 -1 26.5 13.8
 -5 -8 -1 35.4 10.7
 -4 8 -2 218.68 32.2
 4 8 2 61.59 27.7
 -4 8 -2 121.69 24
 4 8 2 95.89 22.4
 -4 -8 -2 63.59 20.3
 4 -8 2 155.38 40.8
 -4 -8 -2 118.99 23.4
 3 8 3 454.65 89.49
 3 8 3 572.34 81.29
 3 -8 3 702.93 85.79
 -3 -8 -3 653.93 85.09
 3 -8 3 463.65 91.29
 -3 -8 -3 626.24 80.79
 -2 8 -4 219.18 47.5
 2 8 4 298.17 56.49
 2 -8 4 314.67 42.9
 2 -8 4 252.37 58.19
 -2 -8 -4 313.27 47.7
 1 8 5 1153.08 152.98
 -1 8 -5 925.91 139.39
 1 8 5 1082.69 138.29
 -1 -8 -5 1029.6 143.19
 -1 -8 -5 983.5 144.09
 1 -8 5 1058.69 138.09
 0 8 6 29.7 11.1
 0 -8 6 69.79 42.9
 0 -8 6 49.2 26.6
 0 -8 -6 78.79 28.4
 -1 8 7 277.07 77.99
 -1 8 7 464.25 69.09
 1 -8 -7 555.14 77.99
 -1 -8 7 344.67 83.09
 1 -8 -7 490.65 66.69
 -1 -8 7 462.85 79.79
 1 -8 -7 253.47 78.69
 -2 8 8 92.39 21.4
 -2 8 8 42.4 27
 -2 8 8 23 30.5
 2 -8 -8 118.29 30.7
 2 -8 -8 69.49 30.7
 2 -8 -8 37.3 29.9
 -2 -8 8 71.49 46.7
 -2 -8 8 67.29 30.3
 -3 8 9 907.01 161.78
 -3 8 9 1142.89 155.88
 -3 8 9 1130.39 153.28
 -3 -8 9 1185.58 146.69
 -3 -8 9 1273.67 183.88
 3 -8 -9 1268.87 165.48
 3 -8 -9 951.9 164.48
 -4 8 10 417.96 69.69
 -4 8 10 403.66 83.79
 -4 8 10 363.76 79.19
 4 -8 -10 345.37 81.59
 4 -8 -10 326.87 81.29
 -4 -8 10 397.36 101.89
 -4 -8 10 464.55 65.19
 -4 -8 10 426.46 57.09
 -5 8 11 394.26 86.59
 -5 8 11 516.35 88.49
 -5 8 11 400.86 96.39
 -5 -8 11 600.74 71.49
 -5 -8 11 554.94 120.09
 5 -8 -11 626.44 109.09
 -5 -8 11 592.74 84.19
 5 -8 -11 405.86 92.29
 -6 8 12 109.39 41.9
 -6 8 12 73.29 36.8
 -6 8 12 16.8 44.2
 6 -8 -12 78.09 62.89
 6 -8 -12 84.39 34.9
 -6 -8 12 91.99 36.9
 -6 -8 12 103.19 59.69
 -6 -8 12 85.59 18.4
 6 -8 -12 60.69 15.6
 7 -8 -13 29 11.2
 -7 9 1 144.39 40.1
 -7 9 1 170.78 36.5
 7 9 -1 123.19 38.8
 7 -9 -1 197.18 31.2
 -7 -9 1 142.39 72.19
 -7 -9 1 162.78 29.2
 7 -9 -1 75.89 60.39
 -7 -9 1 194.28 43.2
 7 -9 -1 35.2 79.39
 7 -9 -1 106.99 39.5
 6 9 0 120.59 36.4
 -6 9 0 140.79 35.6
 -6 9 0 128.89 30.8
 6 -9 0 151.78 25.9
 6 -9 0 425.86 83.89
 -6 -9 0 118.99 25.8
 -6 -9 0 146.19 36.1
 -6 -9 0 82.69 62.89
 6 -9 0 131.99 41.2
 5 9 1 587.34 79.19
 -5 9 -1 558.04 80.79
 5 9 1 482.05 92.59
 -5 9 -1 522.55 83.39
 5 -9 1 486.15 92.19
 5 -9 1 900.11 110.49
 -5 -9 -1 590.04 132.39
 5 -9 1 536.95 76.79
 -5 -9 -1 625.64 87.79
 -5 -9 -1 574.54 78.89
 4 9 2 106.19 36.5
 -4 9 -2 201.58 32.6
 4 9 2 190.28 31.8
 4 -9 2 181.68 42.3
 -4 -9 -2 163.38 31.2
 -4 -9 -2 90.29 66.69
 4 -9 2 225.98 53.39
 -4 -9 -2 200.98 35.8
 -3 9 -3 183.08 33.6
 3 9 3 75.79 31.4
 3 9 3 109.29 27.5
 -3 -9 -3 155.28 29.7
 -3 -9 -3 164.88 29
 3 -9 3 162.08 37.7
 3 -9 3 141.69 37.2
 2 9 4 -3.5 17.3
 -2 9 -4 1.9 10.6
 2 -9 4 -1.7 10.1
 2 -9 4 14.8 18.8
 -2 -9 -4 7.7 8.1
 1 9 5 11.9 7.4
 1 9 5 5.9 20
 -1 -9 -5 0 11.7
 -1 -9 -5 11.5 12.8
 1 -9 5 7.1 9
 0 9 6 65.89 33.5
 0 9 6 167.38 26
 0 -9 -6 258.57 52.59
 0 -9 6 120.09 43
 0 -9 6 182.58 36.3
 0 -9 -6 77.39 29.9
 -1 9 7 203.48 70.79
 -1 9 7 390.26 58.59
 1 -9 -7 394.36 68.49
 1 -9 -7 432.96 58.69
 -1 -9 7 311.17 67.89
 -1 -9 7 322.67 75.39
 1 -9 -7 327.47 72.09
 -2 9 8 844.42 138.59
 -2 9 8 1097.29 127.99
 -2 9 8 809.22 150.08
 -2 -9 8 814.02 153.78
 2 -9 -8 903.51 133.79
 2 -9 -8 856.51 141.09
 2 -9 -8 1025.8 144.59
 -3 9 9 426.16 97.69
 -3 9 9 583.04 85.09
 -3 9 9 591.44 86.89
 -3 -9 9 595.94 75.99
 -3 -9 9 699.73 127.49
 3 -9 -9 421.96 93.89
 -3 -9 9 511.75 75.99
 3 -9 -9 497.05 105.19
 -4 9 10 20.2 32.5
 -4 9 10 45 27.7
 -4 9 10 27.9 21
 -4 -9 10 48.8 19.3
 4 -9 -10 43.3 32.8
 -4 -9 10 63.49 14.1
 4 -9 -10 40.4 37.9
 -4 -9 10 94.99 63.09
 -5 9 11 60.09 31.5
 -5 9 11 29.5 26
 -5 9 11 -15.7 37.6
 -5 -9 11 23.1 16.2
 5 -9 -11 44.5 10.8
 -5 -9 11 52.19 23.5
 5 -9 -11 100.39 49.6
 5 -9 -11 16.3 26.9
 -5 -9 11 33 58.09
 -6 9 12 101.99 41.9
 -6 9 12 155.88 58.69
 -6 -9 12 97.29 20
 -6 -9 12 81.19 34.3
 6 -9 -12 70.89 16.7
 6 -9 -12 198.88 73.99
 6 -9 -12 42.8 31.8
 -6 -9 12 190.28 112.39
 -7 10 1 7.6 13.5
 7 10 -1 25 26.2
 -7 10 1 23.9 24.6
 -7 -10 1 19.4 16.9
 7 -10 -1 19.8 11.3
 -7 -10 1 9.1 9.4
 7 -10 -1 -1.6 21.6
 -7 -10 1 3.7 64.89
 7 -10 -1 26.8 52.09
 7 -10 -1 -81.09 73.09
 -6 10 0 167.78 31.8
 6 10 0 104.79 36.9
 -6 10 0 121.19 32.4
 6 -10 0 93.19 54.59
 -6 -10 0 122.69 26.5
 6 -10 0 206.28 49.6
 6 -10 0 129.29 24.4
 6 -10 0 10.1 67.89
 -6 -10 0 144.69 36.4
 -6 -10 0 63.49 69.09
 -5 10 -1 37.6 13.7
 5 10 1 45.5 26.7
 5 -10 1 57.59 38.2
 5 -10 1 46.2 25.4
 -5 -10 -1 30.9 15.4
 -5 -10 -1 75.89 62.99
 -5 -10 -1 46.7 14.7
 4 10 2 133.89 42.7
 -4 10 -2 203.78 37.1
 -4 -10 -2 215.68 35.4
 -4 -10 -2 141.09 72.79
 4 -10 2 271.37 52.49
 -4 -10 -2 216.98 43.8
 3 10 3 88.69 22.4
 3 10 3 154.78 42.7
 -3 -10 -3 142.69 28.2
 3 -10 3 115.89 33.8
 -3 -10 -3 108.99 23.5
 3 -10 3 108.69 28.7
 -2 -10 -4 2713.33 326.67
 2 -10 4 2654.63 319.77
 -2 -10 -4 2284.87 323.67
 2 -10 4 2103.79 325.97
 1 10 5 75.79 16.1
 1 10 5 39.2 28.3
 1 -10 5 26.7 10.5
 -1 -10 -5 31.9 16.2
 -1 -10 -5 24.7 15.3
 0 10 6 361.76 89.69
 0 10 6 566.84 72.29
 0 -10 6 561.84 83.79
 0 -10 -6 578.14 85.09
 0 -10 -6 385.36 83.89
 -1 10 7 6.9 28.2
 -1 10 7 50.69 15.2
 -1 10 7 45.3 16.8
 1 -10 -7 15.4 21.7
 -1 -10 7 1.5 45.3
 1 -10 -7 22.1 27.9
 1 -10 -7 33.9 22.4
 -1 -10 7 66.79 43
 -1 -10 7 15.1 21.4
 -2 10 8 223.68 51.59
 -2 10 8 333.97 46.2
 -2 10 8 159.18 61.49
 2 -10 -8 188.28 56.59
 2 -10 -8 191.78 53.69
 2 -10 -8 374.26 70.79
 -2 -10 8 302.87 75.69
 -2 -10 8 221.98 61.59
 -3 10 9 -11.1 58.49
 -3 10 9 465.55 77.19
 -3 10 9 156.88 40.4
 -3 -10 9 163.98 35.6
 -3 -10 9 172.88 31.9
 3 -10 -9 124.59 51.69
 3 -10 -9 153.58 47.1
 -3 -10 9 257.47 79.49
 -4 10 10 1393.06 175.48
 -4 10 10 934.51 178.48
 -4 10 10 1141.89 173.08
 4 -10 -10 1264.87 185.98
 -4 -10 10 1156.98 163.18
 -4 -10 10 1564.04 214.88
 -4 -10 10 1469.15 168.68
 4 -10 -10 1137.69 186.88
 -5 10 11 46.2 40.6
 -5 10 11 -18 25.7
 -5 10 11 -2.4 20.7
 5 -10 -11 33.3 31.5
 -5 -10 11 15.1 18.4
 -5 -10 11 -45.6 49.3
 -5 -10 11 22.6 9.9
 5 -10 -11 30 39.7
 -6 10 12 104.89 51.19
 -6 10 12 29.2 29
 -6 -10 12 49.5 30.2
 -6 -10 12 83.89 17.4
 6 -10 -12 56.39 15.3
 6 -10 -12 50.49 61.89
 -6 -10 12 143.39 74.59
 6 -10 -12 70.09 36.9
 -7 11 1 36.9 22.8
 7 11 -1 62.99 29.3
 -7 -11 1 18.5 67.09
 -7 -11 1 95.39 22.1
 7 -11 -1 62.59 17.4
 7 -11 -1 21.1 88.89
 -7 -11 1 55.59 23.6
 7 -11 -1 74.99 60.79
 -6 11 0 272.37 47.8
 6 11 0 247.88 70.19
 -6 -11 0 260.27 44.3
 6 -11 0 316.67 43.2
 6 -11 0 327.57 69.79
 6 -11 0 75.89 92.69
 -6 -11 0 296.17 55.69
 -6 -11 0 319.97 107.49
 6 -11 0 234.38 69.49
 5 11 1 306.07 77.19
 -5 11 -1 375.06 58.79
 5 -11 1 378.96 80.99
 -5 -11 -1 404.86 65.89
 -5 -11 -1 558.64 121.69
 5 -11 1 468.85 75.89
 -5 -11 -1 359.76 56.99
 4 11 2 604.74 87.39
 -4 -11 -2 297.57 59.79
 4 -11 2 410.86 75.79
 4 -11 2 409.16 71.89
 -4 -11 -2 271.07 97.39
 -4 -11 -2 466.75 67.19
 3 11 3 212.78 29.7
 3 11 3 165.48 50.29
 3 -11 3 158.68 44.8
 -3 -11 -3 216.18 39.1
 3 -11 3 176.68 48
 2 11 4 14.5 30.8
 2 -11 4 57.69 27.6
 2 -11 4 35.9 16.7
 -2 -11 -4 24.8 12.1
 -2 -11 -4 -4.3 16.4
 -1 -11 -5 152.88 38.9
 -1 -11 -5 238.18 48.3
 1 -11 5 225.38 34.2
 1 -11 5 229.88 56.19
 0 11 6 675.03 83.19
 0 11 6 559.84 83.19
 0 -11 -6 520.85 98.19
 0 -11 -6 482.65 98.39
 0 -11 6 808.22 103.09
 -1 11 7 357.26 101.39
 -1 11 7 584.74 79.79
 -1 11 7 571.44 77.79
 1 -11 -7 524.75 100.59
 1 -11 -7 637.34 85.69
 -1 -11 7 509.05 113.19
 -1 -11 7 590.74 95.59
 1 -11 -7 434.96 98.69
 -1 -11 7 485.45 115.39
 -2 11 8 358.16 62.49
 -2 11 8 344.17 56.29
 -2 -11 8 427.46 105.79
 -2 -11 8 198.98 70.69
 2 -11 -8 426.06 80.39
 2 -11 -8 350.76 80.99
 2 -11 -8 303.27 63.39
 -3 11 9 483.55 73.29
 -3 11 9 460.65 85.59
 3 -11 -9 463.55 94.19
 3 -11 -9 369.86 86.49
 -3 -11 9 350.96 62.09
 -3 -11 9 516.45 119.69
 -3 -11 9 367.76 58.79
 -4 11 10 93.39 38.7
 -4 11 10 99.89 33.2
 -4 -11 10 115.29 25.7
 4 -11 -10 244.28 72.09
 -4 -11 10 146.49 78.39
 4 -11 -10 74.69 50.49
 -4 -11 10 116.19 30
 -5 11 11 35.4 28.2
 -5 11 11 10.3 26.8
 -5 11 11 53.09 31.3
 -5 -11 11 47.4 14.1
 -5 -11 11 99.99 27.8
 5 -11 -11 42.1 45.6
 -5 -11 11 -24.1 64.69
 5 -11 -11 47.4 35.7
 -6 11 12 116.29 55.79
 -6 11 12 107.89 44.2
 -6 11 12 159.58 50.79
 -6 -11 12 188.28 84.59
 6 -11 -12 192.08 68.49
 -6 -11 12 116.19 25.4
 6 -11 -12 81.79 43.2
 6 -11 -12 162.38 25
 7 12 -1 93.59 36.8
 -7 12 1 87.39 23.8
 7 -12 -1 97.49 64.79
 -7 -12 1 184.68 85.49
 7 -12 -1 -44.9 77.69
 -6 12 0 22 14.8
 6 12 0 -24.4 26.2
 6 -12 0 -37.9 76.39
 -6 -12 0 13.2 72.69
 -6 -12 0 20.1 15.4
 -6 -12 0 14 12.7
 6 -12 0 39.5 11.7
 6 -12 0 44 45.9
 6 -12 0 1.8 28.5
 -5 12 -1 -4 12
 5 12 1 2.6 27.8
 -5 -12 -1 7 12.3
 -5 -12 -1 19.3 12.3
 5 -12 1 -4.5 20.1
 5 -12 1 -8.4 27.9
 -5 -12 -1 -72.09 50.89
 5 -12 1 -3 64.39
 4 12 2 6.5 30.1
 4 -12 2 -0.9 22.9
 4 -12 2 28.2 26.3
 -4 -12 -2 3.2 12.2
 -4 -12 -2 20.4 61.09
 -4 -12 -2 8.6 9.1
 3 12 3 827.52 163.28
 -3 -12 -3 965.2 146.29
 -3 -12 -3 1228.28 151.88
 3 -12 3 1233.18 150.98
 3 -12 3 1131.39 155.48
 2 12 4 1.3 29.6
 2 -12 4 -5.9 15.2
 2 -12 4 26.2 23.1
 -2 -12 -4 21.9 19.1
 -2 -12 -4 3.2 11
 1 12 5 1057.99 158.98
 1 12 5 1078.49 127.29
 1 -12 5 716.03 136.79
 -1 -12 -5 989.6 141.79
 -1 -12 -5 920.61 139.19
 0 12 6 3.3 6.5
 0 12 6 18.2 32.9
 0 -12 6 -23.7 56.79
 0 -12 -6 -8.2 22.8
 0 -12 -6 12.8 27.1
 -1 12 7 17.2 35.1
 -1 12 7 26.7 10.5
 -1 12 7 13.1 14.4
 1 -12 -7 3.2 27.4
 1 -12 -7 86.09 29.6
 -1 -12 7 -18 19.1
 1 -12 -7 26.1 32.7
 -1 -12 7 -12.5 39.3
 -1 -12 7 53.39 50.49
 -2 12 8 79.29 24.2
 -2 12 8 3.1 55.49
 2 -12 -8 78.89 34.5
 -2 -12 8 137.79 68.69
 2 -12 -8 90.59 43.8
 -2 -12 8 28.7 36
 -3 12 9 284.07 55.89
 -3 12 9 161.98 85.89
 -3 12 9 286.67 58.19
 3 -12 -9 350.16 67.39
 -4 12 10 61.69 33.1
 -4 12 10 16.7 21.8
 4 -12 -10 42.9 39.7
 4 -12 -10 50.19 37.7
 -4 -12 10 78.59 66.89
 -4 -12 10 19.8 15.3
 -4 -12 10 12.1 11.8
 -5 12 11 449.46 98.89
 -5 12 11 336.37 81.59
 -5 -12 11 532.95 76.49
 5 -12 -11 550.64 104.79
 5 -12 -11 406.06 98.39
 -5 -12 11 447.86 64.89
 -5 -12 11 484.05 123.59
 -6 12 12 42.5 33.1
 -6 12 12 118.09 43
 -6 12 12 61.09 36.4
 6 -12 -12 5 7.7
 -6 -12 12 5.1 24
 -6 -12 12 -61.59 61.99
 6 -12 -12 10.5 45.5
 6 -12 -12 36.4 34.6
 -6 -12 12 11.9 9.8
 -6 13 0 135.59 31.4
 6 13 0 101.59 48.1
 6 -13 0 53.09 81.39
 6 -13 0 317.17 61.79
 6 -13 0 184.28 27.8
 -6 -13 0 151.98 153.28
 6 -13 0 65.39 65.49
 -6 -13 0 99.19 25.5
 5 13 1 78.99 40.6
 -5 -13 -1 151.98 30.6
 -5 -13 -1 44.6 71.39
 5 -13 1 133.09 44.2
 -5 -13 -1 176.98 36.4
 5 -13 1 130.69 38.1
 5 -13 1 1.2 79.09
 4 13 2 656.23 140.79
 -4 -13 -2 707.13 173.38
 -4 -13 -2 1022.1 122.39
 4 -13 2 883.01 129.79
 4 -13 2 928.81 132.49
 -4 -13 -2 916.41 126.79
 3 13 3 68.49 37.5
 3 -13 3 125.59 35.2
 -3 -13 -3 77.39 21.4
 3 -13 3 2.4 68.99
 3 -13 3 85.09 28.6
 2 13 4 8.3 40
 2 -13 4 69.19 73.59
 -2 -13 -4 213.98 36.4
 2 -13 4 21.1 24.5
 1 13 5 182.28 28.3
 1 13 5 93.29 55.39
 -1 -13 -5 139.09 41.2
 1 -13 5 172.68 45.8
 1 -13 5 84.99 75.59
 -1 -13 -5 292.07 54.09
 0 13 6 1160.38 146.99
 0 13 6 1160.68 146.89
 0 -13 6 866.41 162.78
 0 -13 6 904.71 188.38
 0 -13 -6 1037.6 160.78
 0 -13 -6 1237.28 168.88
 -1 13 7 124.39 31.6
 -1 13 7 56.29 45.3
 -1 13 7 131.39 24.3
 -1 -13 7 51.09 34.9
 1 -13 -7 131.79 43.6
 -1 -13 7 106.79 61.09
 -1 -13 7 66.19 45.5
 1 -13 -7 117.89 38.1
 -2 13 8 831.72 112.09
 -2 13 8 884.41 113.99
 2 -13 -8 928.01 154.18
 -2 -13 8 586.54 123.79
 2 -13 -8 706.63 135.89
 -2 -13 8 785.62 153.88
 -3 13 9 115.99 38.4
 -3 -13 9 166.08 44.4
 3 -13 -9 287.97 64.79
 -3 -13 9 203.68 86.79
 3 -13 -9 348.87 87.79
 -4 13 10 -4.6 20.6
 -4 13 10 21.8 33
 4 -13 -10 17.6 36.2
 -4 -13 10 12.7 14.4
 -4 -13 10 -26.9 62.69
 -4 -13 10 25.1 13.4
 4 -13 -10 40.5 36.5
 -5 13 11 -2 27.4
 -5 13 11 7.3 32.3
 5 -13 -11 -16.7 35.9
 -5 -13 11 6.7 19.5
 -5 -13 11 -7.4 9.1
 5 -13 -11 18.7 34.8
 -5 -13 11 17.1 66.19
 -6 13 12 293.87 71.09
 -6 13 12 191.48 63.49
 6 -13 -12 122.79 53.29
 6 -13 -12 223.28 34.4
 6 -13 -12 425.36 91.89
 -6 -13 12 186.58 50.79
 -6 -13 12 223.98 37
 -6 14 0 59.89 26.8
 -6 14 0 47.3 21.4
 6 14 0 49.9 44.9
 6 -14 0 87.79 88.39
 6 -14 0 70.69 18.4
 -6 -14 0 180.38 38.7
 6 -14 0 93.39 33.2
 -6 -14 0 105.09 23.8
 -6 -14 0 43.5 72.39
 6 -14 0 50.59 48.3
 5 14 1 19.7 39.7
 -5 -14 -1 28.3 68.19
 5 -14 1 -48.4 22
 -5 -14 -1 5.8 13
 5 -14 1 -121.09 63.99
 5 -14 1 26 30.4
 -5 -14 -1 -13.1 9.6
 4 14 2 258.37 84.69
 4 -14 2 271.67 61.09
 4 -14 2 253.17 59.19
 -4 -14 -2 268.87 47.6
 -4 -14 -2 284.17 51.29
 -4 -14 -2 121.89 91.79
 3 14 3 54.29 46.7
 3 -14 3 84.79 31.5
 3 -14 3 125.99 34.1
 3 -14 3 54.29 72.39
 -2 -14 -4 1668.03 209.78
 -2 -14 -4 1616.34 212.48
 2 -14 4 1386.46 208.08
 2 -14 4 1437.66 203.28
 1 14 5 120.29 22
 1 14 5 46.1 46
 1 -14 5 24.3 67.99
 1 -14 5 78.69 31.2
 -1 -14 -5 80.39 35.2
 -1 -14 -5 131.59 32.4
 0 14 6 139.39 30
 0 14 6 40 46.1
 0 14 6 147.99 24.9
 0 -14 -6 109.19 41.4
 0 -14 -6 229.28 46.5
 0 -14 6 192.78 46.1
 0 -14 6 103.69 37.8
 0 -14 6 30.4 63.09
 -1 14 7 17.1 8.5
 -1 14 7 6.7 14.8
 -1 14 7 -0.5 67.19
 -1 -14 7 13.8 23
 1 -14 -7 28.8 43.8
 -1 -14 7 -15.7 47.9
 1 -14 -7 21.3 29.7
 -1 -14 7 13.4 36.8
 -2 14 8 72.99 20.4
 -2 14 8 27.2 56.59
 -2 14 8 61.09 25
 -2 -14 8 64.19 67.59
 2 -14 -8 84.29 41.5
 2 -14 -8 99.19 37.5
 -2 -14 8 94.39 43.4
 -3 14 9 -17.7 18.4
 -3 14 9 26.5 17.7
 3 -14 -9 23.4 31.8
 -3 -14 9 10.8 18.3
 -3 -14 9 78.19 65.19
 3 -14 -9 24.6 36.9
 -4 14 10 414.96 80.39
 -4 14 10 391.36 88.39
 -4 -14 10 623.14 142.09
 4 -14 -10 448.16 106.79
 -4 -14 10 500.25 68.29
 4 -14 -10 407.06 93.89
 -5 14 11 68.49 37.5
 -5 14 11 77.19 36.5
 5 -14 -11 96.29 49.7
 -5 -14 11 99.29 30
 -5 -14 11 61.19 19.8
 5 -14 -11 50.39 40.4
 6 15 0 13 32.7
 6 -15 0 1 82.79
 6 -15 0 -13.2 38.7
 -6 -15 0 0 15.8
 -6 -15 0 -16.1 71.79
 -6 -15 0 5.3 12.8
 6 -15 0 18.5 26
 5 15 1 287.47 101.69
 5 -15 1 237.08 119.89
 5 -15 1 601.14 94.19
 -5 -15 -1 406.26 130.39
 -5 -15 -1 514.45 80.19
 5 -15 1 561.94 88.99
 -5 -15 -1 516.55 73.49
 4 15 2 61.89 46.4
 -4 -15 -2 74.79 22.3
 -4 -15 -2 79.19 76.19
 4 -15 2 -1.5 71.29
 4 -15 2 96.49 36.2
 -4 -15 -2 69.99 21.8
 4 -15 2 83.89 33
 3 15 3 365.86 88.39
 3 -15 3 295.77 108.19
 2 15 4 0.5 35.2
 2 -15 4 30.4 21.4
 -2 -15 -4 5.7 17.8
 2 -15 4 3.3 62.59
 -2 -15 -4 39.1 23
 1 15 5 345.77 49.9
 1 15 5 172.48 74.09
 -1 -15 -5 366.76 70.69
 1 -15 5 473.55 66.19
 -1 -15 -5 411.66 82.19
 0 15 6 5.9 46.3
 0 15 6 93.39 22.5
 0 -15 6 42.6 50.29
 0 -15 6 70.29 26.6
 0 -15 -6 167.58 38.7
 0 -15 6 109.19 30.2
 0 -15 -6 78.99 41.4
 -1 15 7 453.85 66.39
 -1 15 7 414.86 57.99
 -1 -15 7 233.38 80.69
 -1 -15 7 419.66 81.59
 1 -15 -7 475.05 101.99
 1 -15 -7 390.96 90.59
 1 -15 -7 447.36 73.29
 -1 -15 7 339.07 98.39
 -2 15 8 31.1 22.7
 -2 15 8 -24.8 57.19
 -2 15 8 22.3 10.4
 -2 -15 8 54.69 35.1
 2 -15 -8 27.2 33.8
 -2 -15 8 -33.4 33.6
 -2 -15 8 -40.5 97.19
 2 -15 -8 -16.5 34
 -3 15 9 162.78 42.3
 -3 15 9 189.58 50.09
 -3 -15 9 201.38 51.39
 -3 -15 9 150.98 77.09
 3 -15 -9 209.08 54.89
 3 -15 -9 186.08 65.39
 -4 15 10 25.8 26
 -4 15 10 -23.4 17.2
 -4 -15 10 22.2 15.2
 -4 -15 10 -10.9 12.6
 4 -15 -10 21.2 40.1
 -4 -15 10 -53.89 62.19
 4 -15 -10 -15.2 32.6
 -5 15 11 16.8 32.3
 5 -15 -11 41.5 48.9
 -5 -15 11 35 22.4
 -5 -15 11 -14.7 77.09
 -5 -15 11 45 18.4
 5 -15 -11 65.89 43.5
 6 16 0 80.39 46
 -6 -16 0 69.19 29.2
 6 -16 0 43.9 84.49
 6 -16 0 85.59 51.39
 5 -16 1 -12.9 25.7
 5 -16 1 38.4 124.39
 -5 -16 -1 7.8 13.2
 -5 -16 -1 82.19 87.69
 5 -16 1 -34.5 26.2
 -5 -16 -1 -20.3 12
 4 16 2 44.4 47.8
 4 -16 2 94.29 35.4
 -4 -16 -2 29.1 17.7
 4 -16 2 48 75.09
 -4 -16 -2 44.2 21.7
 -4 -16 -2 60.39 79.89
 4 -16 2 76.29 30.3
 3 16 3 366.56 117.59
 3 -16 3 630.34 98.09
 -3 -16 -3 754.62 104.79
 -3 -16 -3 613.54 94.79
 3 -16 3 574.84 94.79
 -2 -16 -4 635.44 97.69
 2 -16 4 548.05 89.29
 -2 -16 -4 693.33 101.49
 2 -16 4 496.75 91.29
 2 -16 4 531.95 156.38
 1 16 5 161.48 31.9
 1 16 5 146.19 60.59
 -1 -16 -5 286.17 60.89
 1 -16 5 179.18 82.19
 1 -16 5 240.98 49.1
 -1 -16 -5 247.78 67.69
 0 16 6 0.1 49
 0 16 6 53.59 20.2
 0 -16 6 97.49 27.9
 0 -16 6 122.79 29.8
 0 -16 6 66.79 53.99
 0 -16 -6 71.59 40.7
 0 -16 -6 62.09 33.3
 -1 16 7 -11.7 13.7
 -1 16 7 35 58.49
 -1 16 7 -3.1 5.6
 -1 -16 7 -17.3 16.3
 -1 -16 7 -39.8 38.1
 1 -16 -7 -19.9 27.9
 -1 -16 7 -10.6 27
 -1 -16 7 -54.69 43.8
 1 -16 -7 -35.8 27.6
 1 -16 -7 5.8 26.5
 -2 16 8 44.9 60.69
 -2 16 8 44.6 23.9
 -2 16 8 51.89 13.7
 2 -16 -8 78.99 49.9
 -2 -16 8 45.5 35.6
 2 -16 -8 64.09 35.5
 -2 -16 8 20.8 61.69
 -2 -16 8 85.89 35.1
 -3 16 9 176.88 44.6
 -3 16 9 141.79 32.8
 3 -16 -9 153.18 48.8
 -3 -16 9 140.19 41.4
 -3 -16 9 354.66 106.29
 3 -16 -9 153.68 60.09
 -4 16 10 145.79 39.3
 -4 16 10 181.58 51.09
 4 -16 -10 165.78 62.59
 -4 -16 10 201.48 41.6
 4 -16 -10 330.97 76.49
 -4 -16 10 251.47 39.8
 -4 -16 10 144.19 94.59
 -5 16 11 148.09 47.8
 -5 16 11 124.49 38.6
 -5 -16 11 103.39 84.69
 5 -16 -11 163.18 60.19
 5 -16 -11 117.39 58.89
 -5 -16 11 161.48 39.7
 -5 -16 11 124.19 28.8
 5 17 1 -16.9 34.1
 5 -17 1 8.7 72.69
 -5 -17 -1 -8 17.1
 -5 -17 -1 -16.2 13.9
 -5 -17 -1 -21.5 77.29
 5 -17 1 35.4 33.9
 4 17 2 404.96 118.19
 4 -17 2 306.87 120.29
 -4 -17 -2 587.44 87.69
 4 -17 2 643.74 99.29
 -4 -17 -2 377.36 132.59
 -4 -17 -2 704.23 95.29
 4 -17 2 649.24 96.79
 3 17 3 -11.3 36.8
 3 -17 3 73.29 28.4
 3 -17 3 -9.8 66.09
 -3 -17 -3 46.6 22.1
 -3 -17 -3 38.4 24.5
 3 -17 3 35.1 26.9
 2 17 4 -9.4 37.8
 -2 -17 -4 32 25.8
 -2 -17 -4 40.2 23.5
 2 -17 4 78.59 29.4
 2 -17 4 46.2 65.09
 2 -17 4 -9.8 17.9
 1 17 5 4.3 42.9
 1 -17 5 23.4 20.8
 -1 -17 -5 38.8 32.8
 -1 -17 -5 39 27.5
 1 -17 5 29.7 55.69
 0 17 6 337.67 62.49
 0 -17 -6 520.55 101.89
 0 -17 6 485.35 68.59
 0 -17 6 209.68 84.49
 0 -17 -6 465.35 84.99
 0 -17 6 451.95 75.79
 -1 17 7 1.6 60.09
 -1 17 7 15.7 19.3
 -1 -17 7 15.3 18.6
 -1 -17 7 -32.5 86.69
 1 -17 -7 -1.6 35.8
 1 -17 -7 18.7 29.9
 -1 -17 7 33.9 47
 1 -17 -7 22.9 31.2
 -1 -17 7 27.7 31.4
 -2 17 8 551.24 77.09
 -2 17 8 522.65 90.39
 -2 -17 8 507.75 111.19
 -2 -17 8 595.54 105.29
 2 -17 -8 593.64 98.59
 2 -17 -8 588.14 122.39
 -2 -17 8 572.84 81.79
 -2 -17 8 646.14 141.19
 -3 17 9 8.5 8.9
 -3 17 9 19.7 24.9
 -3 -17 9 -20.3 22.5
 3 -17 -9 -3.2 33.7
 -3 -17 9 11.4 9.9
 -3 -17 9 160.68 89.09
 3 -17 -9 21.9 33.4
 -4 17 10 46.7 33.3
 -4 17 10 5.8 15.4
 4 -17 -10 -3.4 39.1
 4 -17 -10 13.9 40.6
 -4 -17 10 50.89 84.29
 -4 -17 10 44.4 16.6
 -4 -17 10 14.2 20.1
 -5 17 11 13.9 31.7
 5 -17 -11 40.9 41.5
 -5 -17 11 -1.4 22.1
 5 -17 -11 56.89 50.79
 5 18 1 -1.1 40.2
 -5 -18 -1 71.69 90.09
 5 -18 1 89.89 37.3
 5 -18 1 41.9 27.9
 5 -18 1 0.4 60.59
 -5 -18 -1 -23.5 25.3
 4 18 2 -19.6 45.9
 -4 -18 -2 40.3 26.8
 4 -18 2 143.39 53.89
 -4 -18 -2 141.39 99.29
 4 -18 2 139.89 43.2
 -4 -18 -2 75.39 29
 4 -18 2 61.49 69.49
 3 -18 3 395.96 72.39
 3 -18 3 417.06 75.89
 -3 -18 -3 422.86 80.89
 -3 -18 -3 355.46 72.59
 2 18 4 92.99 55.49
 2 -18 4 109.19 68.79
 2 -18 4 164.98 42
 -2 -18 -4 184.38 58.69
 2 -18 4 200.68 45.5
 -2 -18 -4 146.19 39.9
 -1 -18 -5 840.82 132.49
 -1 -18 -5 767.72 121.39
 1 -18 5 682.63 109.69
 0 18 6 29 58.59
 0 18 6 69.19 22.9
 0 -18 6 20 53.79
 0 -18 -6 94.99 39.3
 0 -18 6 95.29 26.3
 0 -18 -6 68.49 42.4
 -1 18 7 14.3 18.4
 -1 18 7 32.2 61.79
 1 -18 -7 14.3 37.5
 1 -18 -7 -16.6 24.6
 -1 -18 7 -46.7 41.3
 -1 -18 7 -3.1 60.99
 -1 -18 7 16 15.2
 -1 -18 7 3.5 28.7
 1 -18 -7 -3.4 28
 -2 18 8 27.1 26.3
 -2 -18 8 107.09 22.5
 -2 -18 8 47.3 28.9
 2 -18 -8 -1.5 37.7
 -2 -18 8 21.8 41.2
 -2 -18 8 -21.5 62.19
 2 -18 -8 62.99 34.3
 -3 18 9 245.18 64.09
 -3 18 9 295.27 40.5
 3 -18 -9 178.98 68.39
 -3 -18 9 279.97 103.09
 -3 -18 9 241.18 68.69
 3 -18 -9 343.77 77.19
 -3 -18 9 208.58 68.69
 -4 18 10 106.69 28.3
 -4 18 10 92.49 42.8
 4 -18 -10 105.39 53.69
 -4 -18 10 165.58 35.2
 -4 -18 10 97.99 29.9
 -4 -18 10 45.6 90.09
 4 -18 -10 92.79 54.39
 4 19 2 16.8 56.89
 -4 -19 -2 27.9 24
 -4 -19 -2 146.29 92.39
 4 -19 2 50.09 37.4
 -4 -19 -2 7.1 18.5
 4 -19 2 -5.6 22.3
 4 -19 2 20.7 67.39
 3 19 3 29.5 60.59
 3 -19 3 66.09 71.09
 3 -19 3 73.89 30.2
 -3 -19 -3 82.29 35.9
 3 -19 3 56.09 52.79
 -3 -19 -3 36.3 27
 2 19 4 51.19 64.19
 -2 -19 -4 48.4 28.6
 2 -19 4 18.7 23.4
 2 -19 4 -0.1 24.6
 2 -19 4 7.8 56.59
 -2 -19 -4 50.39 31
 1 19 5 8.9 60.29
 1 -19 5 -68.59 52.79
 -1 -19 -5 9.6 30.5
 1 -19 5 16.5 19.7
 -1 -19 -5 33.4 30
 0 19 6 -38 57.89
 0 -19 6 36.7 54.09
 0 -19 -6 68.49 41
 0 -19 6 67.39 22.3
 0 -19 -6 120.09 40.4
 -1 19 7 298.47 65.19
 -1 19 7 163.48 94.49
 1 -19 -7 508.15 110.59
 1 -19 -7 470.75 88.29
 -1 -19 7 461.15 60.29
 -1 -19 7 422.16 86.79
 -1 -19 7 391.16 102.59
 -1 -19 7 417.46 104.99
 2 -19 -8 65.39 52.49
 -2 -19 8 26.1 41.5
 -2 -19 8 77.59 36.6
 2 -19 -8 57.49 35.9
 -2 -19 8 74.79 70.59
 -3 19 9 116.29 43.6
 -3 -19 9 134.29 91.89
 -3 -19 9 194.48 61.19
 3 -19 -9 188.18 58.49
 3 -19 -9 58.49 52.99
 -3 -19 9 129.59 44.7
 -4 19 10 -32.8 26.9
 -4 -19 10 10.7 16.8
 -4 -19 10 9 75.19
 4 -19 -10 13.9 46.2
 4 -19 -10 -0.2 38.1
 4 20 2 54.09 62.99
 -4 -20 -2 19.5 34.6
 -4 -20 -2 0 20.9
 4 -20 2 80.89 39.3
 4 -20 2 39.2 28.1
 3 20 3 13 66.19
 -3 -20 -3 15.9 27.4
 3 -20 3 -5.9 67.69
 3 -20 3 73.79 32.2
 3 -20 3 52.79 33.1
 -3 -20 -3 -1 24.4
 2 -20 4 828.12 109.99
 -2 -20 -4 709.73 123.69
 2 -20 4 585.34 109.29
 1 20 5 53.99 73.79
 1 -20 5 127.09 31.3
 1 -20 5 13.2 66.19
 -1 -20 -5 131.99 47.6
 -1 -20 -5 58.99 44.8
 0 20 6 81.29 83.89
 0 -20 6 257.77 43.4
 0 -20 6 95.39 73.89
 0 -20 -6 188.08 61.89
 0 -20 -6 200.58 49.1
 -1 20 7 -4 20.6
 -1 20 7 -5.4 65.09
 1 -20 -7 -6.8 39.7
 1 -20 -7 38.6 33.8
 -1 -20 7 5.2 48.8
 -1 -20 7 -93.59 48.4
 1 -20 -7 17.7 24.9
 -1 -20 7 -9.9 26
 -1 -20 7 -1.3 14.8
 -1 -20 7 -6.2 6.8
 -2 20 8 43.5 29.9
 -2 -20 8 101.89 42.9
 2 -20 -8 99.09 60.79
 2 -20 -8 60.79 39.3
 -2 -20 8 62.19 48
 -2 -20 8 43.5 76.69
 -3 20 9 39.8 33.1
 -3 -20 9 36.1 30.2
 3 -20 -9 37.9 39.4
 3 -20 -9 0.4 39.7
 -3 -20 9 44.6 40.1
 -3 -20 9 81.49 100.79
 3 21 3 -24.4 71.99
 -3 -21 -3 66.59 36.1
 3 -21 3 70.69 27.9
 -3 -21 -3 33.8 34.3
 3 -21 3 86.19 70.19
 3 -21 3 59.89 37.1
 2 21 4 1.1 70.09
 2 -21 4 25.6 32.6
 2 -21 4 4.6 23.3
 -2 -21 -4 21.6 27.5
 -2 -21 -4 2.8 28.9
 2 -21 4 -23.2 57.49
 1 21 5 20.7 71.69
 1 -21 5 107.09 31.3
 1 -21 5 37 66.89
 -1 -21 -5 124.69 49
 -1 -21 -5 92.89 44.4
 0 21 6 9.2 74.49
 0 -21 6 158.08 39.2
 0 -21 -6 392.16 70.49
 0 -21 -6 131.09 59.49
 0 -21 6 97.59 83.49
 -1 -21 7 84.79 76.59
 -1 -21 7 238.68 36.6
 -1 -21 7 193.48 77.99
 1 -21 -7 205.98 75.59
 1 -21 -7 223.78 84.29
 -1 -21 7 181.68 53.69
 -2 21 8 253.47 65.39
 2 -21 -8 233.58 60.89
 -2 -21 8 173.78 67.39
 2 -21 -8 236.48 78.99
 -2 -21 8 258.67 66.79
 -2 -21 8 258.97 100.39
 -3 21 9 -16.6 32.5
 -3 -21 9 11.5 38
 -3 -21 9 108.69 87.49
 3 -21 -9 48.5 39.2
 -3 -21 9 14.4 31.8
 2 22 4 68.99 80.29
 2 -22 4 25.5 21.2
 2 -22 4 34.6 66.59
 2 -22 4 -35.8 28.7
 -2 -22 -4 3.3 30.1
 -2 -22 -4 -17.5 51.89
 1 22 5 61.39 128.69
 1 -22 5 133.69 96.29
 -1 -22 -5 126.19 54.59
 -1 -22 -5 268.67 81.19
 1 -22 5 279.77 46.7
 0 22 6 37.8 69.29
 0 -22 -6 88.69 45.5
 0 -22 -6 34.6 37.1
 0 -22 -6 31.6 43.5
 0 -22 6 77.49 72.99
 0 -22 6 54.19 18.8
 1 -22 -7 46.8 35.5
 -1 -22 7 28.6 11.9
 1 -22 -7 34.4 51.09
 -1 -22 7 50.39 64.39
 -1 -22 7 -7.9 55.19
 -1 -22 7 -8.5 25
 -2 22 8 8.1 26.7
 2 -22 -8 46.1 41.9
 -2 -22 8 -14.6 35.4
 -2 -22 8 6.2 12.9
 -2 -22 8 -22 74.39
 -2 -22 8 89.59 37.8
 1 23 5 67.19 78.59
 -1 -23 -5 3.8 30.8
 -1 -23 -5 6.2 34.8
 1 -23 5 57.19 69.49
 1 -23 5 35.6 17.7
 0 -23 -6 474.35 94.29
 0 -23 -6 499.05 88.59
 0 -23 6 306.17 113.09
 0 -23 -6 406.56 116.59
 -1 -23 7 101.39 63.49
 1 -23 -7 154.88 65.39
 -1 -23 7 57.99 89.39
 -8 0 1 -1 14.7
 -8 0 1 3.9 33.5
 8 0 -1 -5.6 21.2
 8 0 -1 -21.2 14.7
 -7 0 0 26.6 16.1
 7 0 0 10.1 12.8
 7 0 0 16.4 18.9
 -7 0 0 49.1 34.6
 -6 0 -1 28.5 28.3
 -6 0 -1 -3.2 8.4
 6 0 1 -11.3 7.8
 6 0 1 -27 15.8
 -5 0 -2 780.02 101.69
 5 0 2 765.12 96.39
 -5 0 -2 633.94 110.09
 5 0 2 590.74 104.99
 -4 0 -3 1.4 6.1
 -4 0 -3 15.1 24.1
 4 0 3 -8.7 17.7
 4 0 3 0.2 6.9
 -3 0 -4 1163.28 152.78
 -3 0 -4 1222.38 158.38
 -3 0 -4 1138.79 161.68
 3 0 4 1196.08 153.58
 -2 0 -5 0.9 9.9
 2 0 5 -1.3 5.6
 -2 0 -5 -29.8 19.5
 -2 0 -5 8.3 3.7
 -1 0 -6 2677.03 333.47
 -1 0 -6 2782.42 342.17
 -1 0 -6 2463.65 332.17
 1 0 6 2608.54 332.57
 1 0 6 2533.35 339.07
 0 0 7 -0.7 24.9
 0 0 7 12.1 8.8
 0 0 -7 -16.5 10.9
 0 0 -7 -25.4 9.8
 1 0 -8 266.77 73.39
 -1 0 8 345.67 56.39
 1 0 -8 320.37 59.89
 -1 0 8 411.26 54.59
 -1 0 8 357.46 74.29
 -3 0 10 3021 471.55
 3 0 -10 3409.46 467.45
 3 0 -10 3662.53 450.25
 -3 0 10 3796.52 463.45
 -4 0 11 -16.5 28.9
 4 0 -11 5.9 7.5
 4 0 -11 169.28 58.19
 -4 0 11 -14.5 33
 -4 0 11 -10.9 14.9
 -5 0 12 229.48 60.59
 5 0 -12 146.19 66.29
 -5 0 12 189.38 48.5
 -5 0 12 189.98 62.69
 5 0 -12 212.38 33.5
 -6 0 13 -27.4 33.2
 6 0 -13 -57.59 44.7
 -6 0 13 -4.3 40.2
 -6 0 13 22.1 24.4
 6 0 -13 -14.1 18.2
 -7 0 14 226.28 78.69
 7 0 -14 249.58 95.39
 7 0 -14 204.38 40.5
 -7 0 14 268.37 66.49
 -7 0 14 193.88 67.49
 -8 1 1 87.09 42.3
 8 1 -1 118.09 37.7
 -8 1 1 101.99 27.8
 -8 -1 1 166.08 49.99
 8 -1 -1 90.09 31.6
 -8 -1 1 81.59 28.9
 7 1 0 300.97 62.49
 -7 1 0 422.66 64.49
 7 1 0 317.77 57.19
 -7 1 0 410.06 78.59
 -7 -1 0 443.86 65.39
 7 -1 0 323.47 68.29
 7 -1 0 305.07 55.69
 -7 -1 0 404.96 81.89
 6 1 1 441.96 65.59
 6 1 1 475.05 75.29
 -6 1 -1 476.45 70.79
 -6 1 -1 435.26 80.59
 -6 -1 -1 533.65 87.09
 6 -1 1 388.96 63.69
 -6 -1 -1 522.15 72.69
 6 -1 1 334.57 74.39
 5 1 2 63.69 27.2
 -5 1 -2 81.99 21.3
 -5 1 -2 71.09 32.8
 5 1 2 59.59 17.8
 -5 -1 -2 77.59 39.5
 -5 -1 -2 109.89 24.9
 5 -1 2 102.09 20.5
 5 -1 2 122.49 34.5
 -4 1 -3 92.19 32.5
 4 1 3 173.88 42.3
 -4 1 -3 104.79 24.2
 4 1 3 169.58 24.4
 -4 -1 -3 135.09 26.1
 4 -1 3 58.59 28.8
 -4 -1 -3 325.17 58.29
 4 -1 3 130.29 22
 -4 -1 -3 100.19 19.3
 3 1 4 399.36 65.09
 3 1 4 361.16 47.2
 -3 1 -4 324.37 55.69
 -3 1 -4 333.47 50.99
 3 -1 4 342.57 46.2
 3 -1 4 269.67 64.39
 -3 -1 -4 325.57 45.6
 -3 -1 -4 377.26 52.19
 -3 -1 -4 241.38 62.69
 2 1 5 681.13 83.59
 -2 1 -5 694.63 86.19
 -2 -1 -5 590.24 78.49
 2 -1 5 592.74 82.39
 2 -1 5 520.05 78.49
 1 1 6 715.33 95.99
 -1 1 -6 505.85 100.69
 1 1 6 667.83 88.29
 -1 1 -6 728.73 88.59
 1 -1 6 659.43 87.59
 -1 -1 -6 736.33 87.79
 -1 -1 -6 574.24 97.59
 1 -1 6 669.63 95.69
 0 1 7 721.13 89.49
 0 1 7 531.65 104.79
 0 1 -7 777.42 91.89
 0 -1 -7 485.75 100.09
 0 -1 -7 766.32 90.99
 0 -1 -7 600.14 84.99
 -1 1 8 730.63 90.49
 1 1 -8 544.95 94.19
 1 1 -8 923.41 107.49
 -1 1 8 608.94 100.49
 -1 1 8 614.34 89.39
 -1 -1 8 452.05 89.49
 -1 -1 8 556.44 107.89
 1 -1 -8 768.42 94.49
 -2 1 9 1243.58 157.48
 2 1 -9 1056.09 162.38
 -2 1 9 1085.49 161.18
 -2 1 9 746.03 170.08
 2 -1 -9 1082.99 160.28
 2 -1 -9 1130.49 144.49
 -2 -1 9 1157.68 177.08
 -2 -1 9 1393.66 162.18
 -3 1 10 -7.4 20.7
 3 1 -10 -1.4 5.9
 -3 1 10 -34.8 20.3
 3 -1 -10 3.5 4.7
 3 -1 -10 -6.1 8.6
 -3 -1 10 11.8 15.7
 3 -1 -10 10.4 31.5
 4 1 -11 221.88 73.49
 4 1 -11 216.98 37.6
 -4 1 11 201.58 46.6
 -4 1 11 218.28 60.39
 -4 1 11 217.18 65.89
 4 -1 -11 282.37 36.5
 4 -1 -11 227.98 71.89
 -4 -1 11 324.17 50.29
 -4 -1 11 267.07 70.59
 -4 -1 11 112.29 51.69
 4 -1 -11 292.47 42.8
 -5 1 12 105.39 49.6
 5 1 -12 110.49 65.39
 -5 1 12 162.48 48.5
 5 1 -12 131.59 27.6
 -5 1 12 140.19 35.7
 5 -1 -12 60.19 60.79
 -5 -1 12 129.69 49.1
 -5 -1 12 77.49 46.2
 5 -1 -12 140.09 24.9
 -5 -1 12 120.59 35.3
 6 1 -13 24.8 59.49
 6 1 -13 130.69 41.5
 -6 1 13 133.19 51.49
 -6 1 13 83.29 36.8
 -6 1 13 161.18 58.69
 -6 -1 13 101.69 48
 -6 -1 13 247.28 63.49
 -6 -1 13 145.09 40.4
 6 -1 -13 119.29 71.99
 6 -1 -13 182.88 30.1
 -7 1 14 164.38 46.4
 -7 1 14 66.19 50.39
 -7 1 14 132.89 57.89
 7 1 -14 52.19 70.89
 7 -1 -14 122.19 25.5
 -7 -1 14 46.5 63.29
 7 -1 -14 240.28 88.89
 -7 -1 14 183.68 63.69
 -8 2 1 150.58 50.39
 -8 2 1 233.98 49.7
 8 -2 -1 129.79 41
 -8 -2 1 166.48 51.59
 -8 -2 1 253.57 51.39
 -7 2 0 17.8 32
 7 2 0 -12.9 11.9
 -7 2 0 23.9 14.1
 7 2 0 15.7 19
 7 -2 0 22.5 13
 -7 -2 0 0.8 10.5
 7 -2 0 19.9 22.8
 -7 -2 0 6.9 34.6
 6 2 1 7 18.5
 -6 2 -1 13.5 27.9
 6 2 1 -2.7 10.1
 -6 2 -1 3 8.5
 6 -2 1 -30 43.6
 6 -2 1 -3.1 19
 6 -2 1 8 8.7
 -6 -2 -1 4.8 9.7
 -6 -2 -1 6.9 28.1
 -5 2 -2 61.39 28.6
 5 2 2 40.7 16.9
 5 2 2 25.1 20.8
 -5 2 -2 28.4 12.3
 -5 -2 -2 63.19 38.6
 5 -2 2 49.4 25.7
 -5 -2 -2 37.4 13
 5 -2 2 43.5 14.2
 -5 -2 -2 34 13.5
 5 -2 2 15 39.2
 4 2 3 1198.58 163.38
 -4 2 -3 1314.77 169.68
 -4 2 -3 1360.26 167.38
 4 2 3 1121.39 170.58
 -4 -2 -3 1408.86 168.78
 -4 -2 -3 1273.17 161.88
 4 -2 3 1088.49 177.88
 4 -2 3 1100.39 172.78
 -4 -2 -3 1034.3 177.68
 4 -2 3 1343.77 162.58
 3 2 4 71.29 27.8
 -3 2 -4 82.59 19.4
 -3 2 -4 40.8 18
 3 2 4 59.99 13.9
 -3 -2 -4 42.9 13.9
 3 -2 4 67.89 12.5
 3 -2 4 64.99 29
 -3 -2 -4 136.59 37.8
 -3 -2 -4 81.29 12.9
 -2 2 -5 1943.31 270.67
 2 2 5 1988.3 268.87
 -2 2 -5 2312.27 265.57
 2 2 5 1961.5 265.67
 -2 -2 -5 2002.7 264.87
 -2 -2 -5 1990.9 270.97
 2 -2 5 2170.08 268.57
 2 -2 5 2083.89 264.77
 1 2 6 3.2 7.2
 -1 2 -6 4.6 16.7
 1 -2 6 1.1 11
 -1 -2 -6 13.6 4.4
 -1 -2 -6 2.7 14.9
 1 -2 6 4.2 2.7
 0 2 7 105.39 25.8
 0 2 -7 103.79 24.5
 0 2 -7 100.59 33.2
 0 2 7 84.39 30.2
 0 -2 -7 110.29 28
 0 -2 7 99.89 29.4
 0 -2 -7 122.39 36.9
 -2 2 9 2251.77 307.37
 2 2 -9 1875.71 298.37
 -2 2 9 2190.78 293.57
 2 -2 -9 1989.1 295.67
 -2 -2 9 2245.98 297.17
 -2 -2 9 2551.24 288.97
 -2 -2 9 2106.79 306.77
 2 -2 -9 2150.38 283.97
 -2 -2 9 2355.86 283.97
 -3 2 10 86.09 34.8
 -3 2 10 110.39 47.4
 3 2 -10 34.3 42.1
 -3 -2 10 66.39 39.6
 3 -2 -10 114.09 15.6
 3 -2 -10 44.4 34.9
 3 -2 -10 80.29 26.4
 -3 -2 10 102.59 30.4
 -3 -2 10 114.39 38.2
 -4 2 11 881.61 129.39
 -4 2 11 777.42 118.89
 -4 2 11 678.03 150.18
 4 2 -11 597.54 142.69
 4 -2 -11 881.01 142.59
 -4 -2 11 777.82 152.08
 -4 -2 11 780.62 132.59
 4 -2 -11 930.21 116.99
 4 -2 -11 820.62 110.49
 -4 -2 11 980.5 121.49
 -5 2 12 40.6 36.7
 5 2 -12 75.99 59.29
 -5 2 12 102.99 32
 -5 2 12 54.49 42.5
 -5 -2 12 131.19 51.89
 5 -2 -12 30.3 47.2
 -5 -2 12 71.19 27.3
 -5 -2 12 90.59 45.9
 5 -2 -12 66.79 15.7
 5 -2 -12 75.79 19.1
 -6 2 13 0.1 40
 -6 2 13 27 34.5
 -6 2 13 11.8 23.3
 6 2 -13 -10.9 55.19
 6 -2 -13 5.8 10.4
 -6 -2 13 -13.4 32.3
 -6 -2 13 -12.4 37.8
 -6 -2 13 -6.1 20.1
 6 -2 -13 -17.1 50.49
 -7 2 14 61.59 49.99
 7 2 -14 -6.8 59.19
 -7 2 14 13.5 26.3
 -7 2 14 -16.3 34
 -7 -2 14 12.9 47.7
 7 -2 -14 7.2 13.6
 -7 -2 14 23.2 31.7
 -7 -2 14 -21.6 39.3
 7 -2 -14 -20.8 56.39
 -8 3 1 50.69 34.1
 8 3 -1 15 16.7
 -8 -3 1 42 41
 -8 -3 1 3.8 15.2
 8 -3 -1 35.3 27.1
 7 3 0 562.44 85.89
 -7 3 0 529.35 93.89
 -7 3 0 617.24 86.79
 7 3 0 380.66 80.59
 7 -3 0 543.05 77.99
 7 -3 0 588.44 92.99
 -7 -3 0 618.54 107.99
 7 -3 0 248.38 104.99
 -7 -3 0 736.93 92.49
 6 3 1 14.3 14.5
 -6 3 -1 32 28.1
 6 3 1 55.79 26.1
 -6 3 -1 48.4 15.3
 -6 -3 -1 57.29 40.5
 -6 -3 -1 37.5 17.2
 6 -3 1 42.7 25.3
 -6 -3 -1 24 9.9
 6 -3 1 19.7 11
 6 -3 1 -7.9 41
 -5 3 -2 501.85 86.39
 5 3 2 590.24 86.79
 -5 3 -2 687.63 83.49
 5 3 2 525.05 83.79
 -5 -3 -2 547.65 80.59
 5 -3 2 507.05 104.49
 5 -3 2 606.34 91.79
 -5 -3 -2 606.44 106.09
 -5 -3 -2 543.25 83.69
 5 -3 2 475.15 78.59
 4 3 3 62.79 25.6
 4 3 3 40.3 14.9
 -4 3 -3 123.79 22.3
 -4 3 -3 58.29 22.8
 4 -3 3 93.39 16.3
 4 -3 3 42.7 32.9
 -4 -3 -3 118.89 22.7
 4 -3 3 38.2 27
 -4 -3 -3 55.59 40
 -4 -3 -3 76.19 14.9
 -3 3 -4 42.8 12.7
 3 3 4 80.49 14.2
 -3 3 -4 45.8 14.5
 -3 -3 -4 -10.8 26.6
 -3 -3 -4 53.29 11.2
 3 -3 4 45.9 25.8
 3 -3 4 42.2 21.2
 -3 -3 -4 28.5 13.4
 3 -3 4 51.29 10.1
 -2 3 -5 336.37 65.99
 2 3 5 410.46 61.79
 2 -3 5 428.26 57.39
 -2 -3 -5 455.85 65.89
 2 -3 5 452.45 60.99
 -2 -3 -5 479.05 58.59
 1 3 6 1481.55 166.68
 1 3 6 1186.28 165.08
 -1 3 -6 1097.09 168.88
 -1 -3 -6 1172.08 159.78
 -1 -3 -6 1210.98 168.68
 0 3 -7 257.77 47.7
 0 3 -7 329.97 62.09
 0 3 7 313.27 48.2
 0 3 7 387.96 57.59
 0 -3 7 229.88 63.89
 0 -3 -7 251.37 59.99
 0 -3 -7 349.96 46.1
 0 -3 7 272.27 44.8
 -1 3 8 2087.49 272.67
 1 3 -8 2261.37 275.67
 -1 3 8 1866.21 267.07
 1 -3 -8 2229.38 268.67
 -1 -3 8 2270.57 283.37
 -1 -3 8 1809.52 270.07
 1 -3 -8 1926.01 269.47
 2 3 -9 78.59 35.6
 -2 3 9 27.1 28.2
 -2 3 9 -12.2 19.4
 -2 3 9 21 22.7
 -2 -3 9 39.8 10.5
 -2 -3 9 15.5 24.8
 -2 -3 9 12.3 24.2
 -2 -3 9 47.4 7.8
 2 -3 -9 34.9 14.1
 -3 3 10 31 34.2
 3 3 -10 63.39 40.5
 -3 3 10 29.4 26.3
 -3 3 10 -16.3 25.9
 -3 -3 10 -17.1 27.8
 3 -3 -10 -8.6 27.9
 -3 -3 10 15 5
 -3 -3 10 4.5 32.1
 3 -3 -10 7.7 12
 -3 -3 10 16.7 14.1
 3 -3 -10 6.5 4.6
 -4 3 11 12.2 14.4
 4 3 -11 -9.6 43.8
 -4 3 11 13.4 29.2
 -4 3 11 -60.29 35.4
 -4 -3 11 -32 27.6
 -4 -3 11 -1.4 31.7
 4 -3 -11 6.8 13.5
 4 -3 -11 36.7 38.1
 4 -3 -11 4.6 5.6
 -5 3 12 580.84 96.79
 5 3 -12 555.74 128.69
 -5 3 12 665.13 131.79
 -5 3 12 549.85 104.69
 5 -3 -12 669.43 125.59
 5 -3 -12 530.95 82.09
 -5 -3 12 849.12 119.69
 5 -3 -12 598.14 88.79
 -5 -3 12 702.73 96.59
 -5 -3 12 917.81 146.39
 -6 3 13 -23.8 32.8
 6 3 -13 154.58 72.29
 -6 3 13 7.8 20.1
 -6 3 13 -21 36
 -6 -3 13 36.6 41.3
 6 -3 -13 -2 12.3
 -6 -3 13 7 23.6
 6 -3 -13 -11.7 8.1
 6 -3 -13 12.8 52.39
 -6 -3 13 26.4 43.8
 -7 3 14 228.68 84.29
 -7 3 14 328.47 72.99
 7 3 -14 264.07 100.39
 -7 3 14 347.87 82.69
 7 -3 -14 278.07 45.5
 -7 -3 14 256.47 80.89
 -7 -3 14 268.27 69.39
 -7 -3 14 160.48 74.59
 7 -3 -14 270.67 94.99
 -7 4 0 3 30.2
 7 4 0 77.59 24.2
 -7 4 0 41.5 19.4
 7 -4 0 69.49 18.7
 -7 -4 0 57.29 21.9
 7 -4 0 39.8 29.1
 -7 -4 0 84.59 46
 7 -4 0 21.6 55.19
 6 4 1 -5.5 13
 -6 4 -1 -2.2 20.9
 6 4 1 0.6 15.6
 6 -4 1 -13.9 5.8
 -6 -4 -1 16.4 11.2
 -6 -4 -1 6.7 38.4
 6 -4 1 33.7 47.4
 6 -4 1 -3.1 19.4
 -6 -4 -1 1.2 5.7
 -5 4 -2 367.06 66.59
 -5 4 -2 467.65 63.39
 5 4 2 326.67 66.19
 5 4 2 353.16 60.69
 -5 -4 -2 400.36 56.59
 5 -4 2 480.65 57.99
 -5 -4 -2 430.26 65.59
 5 -4 2 391.36 87.39
 -5 -4 -2 349.07 91.69
 4 4 3 575.24 88.69
 -4 4 -3 694.13 91.19
 4 4 3 665.73 96.39
 -4 4 -3 638.34 91.59
 4 -4 3 569.74 101.29
 -4 -4 -3 739.33 93.89
 4 -4 3 659.53 86.39
 -4 -4 -3 633.84 86.49
 4 -4 3 558.44 103.29
 -4 -4 -3 725.33 116.79
 -3 4 -4 1937.61 233.78
 -3 4 -4 1931.91 229.48
 -3 -4 -4 1861.21 229.18
 3 -4 4 1476.05 238.38
 3 -4 4 1922.31 228.68
 3 -4 4 1515.55 233.38
 -3 -4 -4 1873.71 234.98
 -3 -4 -4 1399.06 243.48
 2 4 5 9 7
 -2 -4 -5 16.4 6.7
 2 -4 5 16.5 7.6
 1 4 6 176.68 32.8
 -1 -4 -6 206.78 38.9
 0 4 7 19.4 15.9
 0 4 7 52.89 19.5
 0 -4 -7 50.89 17.6
 0 -4 -7 44.5 23.7
 0 -4 7 41 16
 -1 4 8 631.84 108.29
 1 4 -8 616.04 121.09
 -1 4 8 767.92 118.19
 -1 4 8 896.01 127.89
 1 -4 -8 616.44 128.69
 1 -4 -8 802.32 110.99
 1 -4 -8 845.32 112.59
 -1 -4 8 986.9 119.39
 -1 -4 8 1093.89 138.69
 -2 4 9 185.18 39.6
 -2 4 9 212.78 47.3
 2 4 -9 129.19 46.6
 -2 4 9 146.09 43.1
 -2 -4 9 302.17 69.99
 2 -4 -9 217.58 43.9
 -2 -4 9 202.18 46.3
 2 -4 -9 165.58 35.5
 -2 -4 9 161.48 24.1
 3 4 -10 1019.2 185.88
 -3 4 10 1315.57 172.98
 -3 4 10 1683.33 195.78
 3 -4 -10 968.6 175.88
 -3 -4 10 1358.96 196.38
 -3 -4 10 1223.98 181.88
 3 -4 -10 1240.88 171.18
 3 -4 -10 1256.07 160.68
 -3 -4 10 1285.87 160.98
 -4 4 11 100.89 39.2
 -4 4 11 102.19 30.1
 -4 4 11 67.89 48.7
 4 -4 -11 100.99 18.9
 -4 -4 11 145.69 19.6
 -4 -4 11 163.98 54.19
 4 -4 -11 118.89 45.9
 4 -4 -11 129.59 41.6
 -5 4 12 93.49 39.7
 -5 4 12 97.59 53.49
 5 4 -12 74.09 62.99
 -5 4 12 118.79 33.9
 5 -4 -12 142.39 59.19
 5 -4 -12 103.69 29.7
 -5 -4 12 166.58 42.2
 5 -4 -12 99.29 20.6
 -5 -4 12 151.88 53.59
 -6 4 13 14.2 33.2
 6 4 -13 -12.4 52.09
 -6 4 13 31.5 47
 -6 4 13 2 24.8
 6 -4 -13 26.1 56.79
 -6 -4 13 18.5 45.6
 -6 -4 13 24.3 26.3
 -6 -4 13 51.99 44.3
 6 -4 -13 7.3 13.4
 6 -4 -13 15.6 10.1
 -7 4 14 10.8 56.79
 7 4 -14 43.4 74.09
 -7 4 14 20.2 39.9
 -7 4 14 91.89 37.7
 -7 -4 14 9 28
 7 -4 -14 17.1 68.09
 -7 -4 14 60.69 64.79
 7 -4 -14 42.3 14.3
 7 -4 -14 21.2 11
 -7 5 0 16.8 25
 -7 5 0 11.5 12.3
 7 5 0 2.9 16.7
 7 5 0 -6.7 14.5
 -7 -5 0 -5.8 39.4
 -7 -5 0 -3.7 6.3
 -7 -5 0 32.9 16
 7 -5 0 -59.49 21
 7 -5 0 -12.5 8.4
 7 -5 0 35.8 55.29
 6 5 1 876.21 129.59
 -6 5 -1 930.71 132.19
 6 5 1 993.2 131.79
 -6 5 -1 1037.3 130.69
 6 -5 1 933.71 137.09
 -6 -5 -1 834.92 122.39
 -6 -5 -1 899.81 154.58
 6 -5 1 685.13 149.39
 -6 -5 -1 1013 134.79
 6 -5 1 916.31 123.69
 5 5 2 21 17.2
 -5 5 -2 29.8 20.1
 -5 5 -2 15.9 9.9
 5 -5 2 7.4 20.1
 5 -5 2 29.1 9.2
 -5 -5 -2 9 43.7
 5 -5 2 -33.7 31.8
 -5 -5 -2 19 8.3
 -5 -5 -2 16.4 10.6
 -4 5 -3 246.28 45
 4 5 3 206.78 51.29
 -4 5 -3 297.27 44.3
 4 -5 3 221.98 58.79
 -4 -5 -3 337.27 47.3
 4 -5 3 258.67 38.6
 -4 -5 -3 310.77 40.1
 4 -5 3 228.38 55.29
 -4 -5 -3 222.38 66.69
 -3 5 -4 13.4 8
 3 5 4 1 14.1
 3 5 4 -4 8.6
 -3 5 -4 -4.9 6.3
 3 -5 4 8.5 20
 3 -5 4 2.1 3.3
 -3 -5 -4 -4.3 4.6
 3 -5 4 -4.8 13.9
 -3 -5 -4 -3.5 5.9
 2 5 5 176.58 29.7
 2 -5 5 142.89 29.7
 -2 -5 -5 177.18 28.6
 2 -5 5 163.98 27.6
 -2 -5 -5 184.68 35.4
 1 5 6 35.4 11.6
 1 -5 6 22.2 14.7
 0 5 7 3476.85 495.35
 0 5 -7 3541.15 497.85
 0 5 7 4341.17 499.75
 0 -5 -7 3258.87 498.05
 0 -5 -7 4362.06 495.65
 0 -5 7 3879.01 493.95
 0 -5 -7 4144.39 492.65
 0 -5 7 3290.27 497.85
 -1 5 8 150.58 34.5
 -1 5 8 30.2 27.6
 1 5 -8 63.39 37.7
 1 -5 -8 -12.1 34.2
 -1 -5 8 -54.69 30.3
 1 -5 -8 35.3 18.3
 2 5 -9 484.25 93.49
 -2 5 9 461.05 87.49
 -2 5 9 377.36 86.79
 -2 5 9 571.34 79.09
 2 -5 -9 498.45 82.49
 -2 -5 9 570.84 70.39
 -2 -5 9 561.54 96.09
 -2 -5 9 640.74 91.29
 2 -5 -9 577.24 82.09
 -3 5 10 52.89 34.7
 3 5 -10 -31.5 42.1
 -3 5 10 36 15.1
 -3 5 10 21.4 26.4
 -3 5 10 -11.5 34.2
 -3 -5 10 30.1 7.6
 3 -5 -10 7.1 17.9
 -3 -5 10 4.6 35.3
 3 -5 -10 -23.2 27
 -3 -5 10 151.58 47.7
 -4 5 11 424.86 103.89
 -4 5 11 230.88 69.79
 4 5 -11 159.78 76.69
 -4 -5 11 350.86 46.7
 4 -5 -11 342.67 65.39
 4 -5 -11 365.96 46.6
 -4 -5 11 372.36 85.09
 -5 5 12 67.39 37.1
 5 5 -12 26.9 58.29
 -5 5 12 27.3 39.9
 -5 5 12 41.2 26.4
 5 -5 -12 57.89 52.49
 5 -5 -12 32 10.9
 -5 -5 12 43.5 42.8
 -5 -5 12 72.49 13.5
 5 -5 -12 61.09 23.6
 6 5 -13 403.76 124.69
 -6 5 13 521.65 101.09
 -6 5 13 608.34 104.19
 -6 5 13 573.04 141.69
 -6 -5 13 748.43 125.59
 6 -5 -13 564.24 89.79
 -6 -5 13 639.84 97.79
 6 -5 -13 439.76 125.49
 6 -5 -13 596.84 79.59
 -7 5 14 68.29 31.2
 -7 5 14 -7.4 51.59
 7 -5 -14 -14.3 9
 7 -5 -14 -37.7 52.69
 -7 -5 14 30.2 29.3
 7 -5 -14 -2.2 9.1
 -7 6 0 29.8 26.1
 7 6 0 14.7 18.3
 -7 6 0 6.5 12.5
 7 6 0 44.3 20.4
 7 -6 0 -21 32.2
 7 -6 0 30.3 17.9
 -7 -6 0 0.1 13.4
 -7 -6 0 -36.7 41.9
 7 -6 0 48.7 59.19
 -7 -6 0 7.3 13.2
 6 6 1 -1.8 12.8
 -6 6 -1 -6.1 7.3
 -6 6 -1 16.3 19.8
 6 6 1 12.6 15.2
 6 -6 1 57.89 45.2
 -6 -6 -1 -7.6 5.8
 -6 -6 -1 0.8 7.9
 -6 -6 -1 -46.7 40.6
 6 -6 1 -6.9 18.3
 6 -6 1 3.4 8
 -5 6 -2 194.18 44.1
 -5 6 -2 226.18 40.7
 5 6 2 190.78 44.3
 5 6 2 281.87 49
 5 -6 2 235.38 61.89
 -5 -6 -2 285.07 74.89
 5 -6 2 224.28 58.49
 -5 -6 -2 262.27 37.1
 -5 -6 -2 321.17 47.5
 5 -6 2 218.68 35.8
 4 6 3 935.51 133.49
 -4 6 -3 1037.6 132.29
 4 6 3 1105.39 136.89
 -4 6 -3 1037.1 130.29
 4 -6 3 924.91 142.49
 -4 -6 -3 790.12 158.28
 4 -6 3 757.32 138.69
 -4 -6 -3 985.4 134.49
 4 -6 3 955.3 127.19
 -4 -6 -3 948.51 128.09
 -3 6 -4 887.01 114.49
 3 6 4 956.4 118.49
 3 6 4 620.94 114.39
 -3 -6 -4 846.22 110.09
 -3 -6 -4 830.62 115.49
 3 -6 4 759.82 121.49
 3 -6 4 875.41 114.99
 2 6 5 430.36 67.99
 -2 6 -5 523.35 80.19
 2 6 5 386.66 62.09
 2 -6 5 452.65 58.89
 -2 -6 -5 421.96 65.89
 -2 -6 -5 379.16 59.89
 2 -6 5 474.35 60.19
 -1 6 -6 198.48 45.9
 1 6 6 192.18 52.09
 1 6 6 261.97 39.3
 1 -6 6 292.37 46.6
 1 -6 6 256.97 47.3
 -1 -6 -6 216.08 50.69
 0 6 7 22.6 23.6
 0 6 -7 66.69 23.9
 0 -6 7 21.3 26.2
 0 -6 -7 26.9 16.8
 -1 6 8 147.19 48.9
 1 6 -8 207.48 53.69
 1 -6 -8 134.29 50.89
 1 -6 -8 322.97 46.9
 -1 -6 8 174.78 46.2
 -1 -6 8 172.38 51.09
 -2 6 9 235.18 39.3
 -2 6 9 140.29 46.1
 2 6 -9 167.68 51.39
 -2 6 9 117.59 38.7
 -2 -6 9 268.97 62.29
 2 -6 -9 283.27 60.69
 2 -6 -9 184.18 42.9
 -2 -6 9 195.58 28.5
 2 -6 -9 206.58 42.1
 -2 -6 9 241.98 56.09
 -3 6 10 1149.08 152.08
 -3 6 10 740.03 169.28
 -3 6 10 1149.08 155.28
 3 6 -10 907.51 172.88
 3 -6 -10 1145.09 164.38
 -3 -6 10 1271.27 172.78
 3 -6 -10 1147.29 160.08
 -3 -6 10 1135.59 182.58
 -3 -6 10 1141.69 144.39
 -4 6 11 121.39 32.1
 4 6 -11 67.09 67.49
 -4 6 11 55.09 42.3
 -4 6 11 99.09 36.9
 4 -6 -11 68.99 13.9
 -4 -6 11 77.39 15.3
 4 -6 -11 34 38.1
 -5 6 12 97.39 39.1
 -5 6 12 82.79 30
 5 6 -12 148.29 68.59
 -5 6 12 64.79 41.6
 5 -6 -12 61.69 28.1
 -5 -6 12 69.39 50.69
 -5 -6 12 81.39 26.2
 -5 -6 12 48.7 12.8
 5 -6 -12 71.89 15.1
 5 -6 -12 40.7 47.7
 -6 6 13 28.8 26.8
 -6 6 13 36.2 45.7
 6 6 -13 -25.7 56.29
 -6 6 13 7.4 36.3
 6 -6 -13 13 20.4
 6 -6 -13 11.7 9.9
 -6 -6 13 18.7 46.2
 -6 -6 13 22.1 23.6
 6 -6 -13 -34.5 45.9
 -7 6 14 119.99 71.79
 7 -6 -14 27.8 15.6
 -7 -6 14 44.7 29.2
 7 -6 -14 32.4 13.7
 7 7 0 414.16 73.89
 -7 7 0 397.66 67.69
 -7 7 0 360.16 72.69
 -7 -7 0 400.76 59.39
 7 -7 0 400.46 61.69
 7 -7 0 488.35 82.39
 7 -7 0 505.85 117.29
 -7 -7 0 382.36 104.29
 -7 -7 0 431.36 75.29
 -6 7 -1 18.7 14.6
 -6 7 -1 107.79 26.4
 6 7 1 46.7 18.2
 6 7 1 46.3 20.2
 -6 -7 -1 52.09 18.3
 6 -7 1 25.5 43.3
 6 -7 1 60.69 29.8
 -6 -7 -1 39.3 11.7
 6 -7 1 32.8 11.9
 -6 -7 -1 75.09 57.09
 -5 7 -2 682.73 100.89
 5 7 2 686.13 106.29
 -5 7 -2 822.52 102.39
 5 7 2 725.93 101.69
 -5 -7 -2 722.23 105.29
 5 -7 2 685.73 112.09
 5 -7 2 733.33 96.69
 5 -7 2 716.13 120.19
 -5 -7 -2 587.34 133.19
 -5 -7 -2 723.43 97.29
 -4 7 -3 -24.5 13.8
 4 7 3 -14.4 14.2
 4 7 3 1.2 13.2
 4 -7 3 24.7 24.3
 -4 -7 -3 -2.6 7.3
 4 -7 3 -40.6 24
 4 -7 3 -0.3 4.7
 -4 -7 -3 1.4 7.4
 -4 -7 -3 34 55.69
 3 7 4 -13.4 15.7
 3 7 4 11.4 13.6
 -3 7 -4 1.9 11
 3 -7 4 -18.8 13.8
 -3 -7 -4 12.4 8.1
 -3 -7 -4 11.8 9.7
 2 7 5 12.8 16
 -2 7 -5 20.4 16.5
 -2 -7 -5 -10.5 6.6
 -2 -7 -5 4.1 10.1
 2 -7 5 22.1 6.9
 2 -7 5 4.8 7.5
 1 7 6 2713.93 343.57
 1 7 6 2719.53 351.56
 -1 7 -6 2227.68 345.67
 -1 -7 -6 2861.61 348.97
 1 -7 6 2706.13 344.37
 0 7 7 239.88 47.6
 0 -7 7 282.97 66.99
 0 -7 -7 317.67 70.49
 0 -7 7 267.67 68.09
 -1 7 8 1386.56 212.18
 -1 7 8 1284.67 216.28
 1 -7 -8 1597.34 208.88
 -1 -7 8 1712.03 217.88
 -1 -7 8 1665.13 220.38
 1 -7 -8 1872.41 215.58
 1 -7 -8 1432.76 218.58
 -2 7 9 80.29 26.4
 -2 7 9 59.09 33.9
 -2 7 9 148.79 39.5
 2 7 -9 53.19 45.2
 2 -7 -9 135.99 41.3
 2 -7 -9 195.38 42
 -2 -7 9 86.89 44.8
 -2 -7 9 169.68 48.1
 2 -7 -9 61.79 28.6
 -3 7 10 181.18 40.4
 -3 7 10 85.19 23
 -3 7 10 44.3 48
 -3 7 10 47.5 28.6
 3 7 -10 109.59 52.39
 -3 -7 10 69.29 51.79
 -3 -7 10 88.69 17.7
 3 -7 -10 76.09 31.6
 3 -7 -10 81.99 38.8
 -4 7 11 -14.6 23.7
 -4 7 11 56.69 38.6
 4 7 -11 48.5 52.89
 4 -7 -11 -22.1 18.5
 -4 -7 11 -1.4 5.8
 4 -7 -11 -45.4 26.1
 -4 -7 11 -44.1 34.4
 5 7 -12 486.75 140.99
 -5 7 12 690.53 116.19
 -5 7 12 685.83 114.09
 -5 7 12 620.04 144.39
 -5 -7 12 771.42 111.29
 5 -7 -12 792.52 99.79
 5 -7 -12 824.72 120.09
 -5 -7 12 761.62 99.79
 5 -7 -12 704.83 133.09
 -5 -7 12 914.41 144.59
 6 7 -13 -105.09 60.89
 -6 7 13 23.4 46.5
 -6 7 13 11.2 30.9
 -6 7 13 -1.7 23.4
 6 -7 -13 -32.2 48.6
 -6 -7 13 3.4 6.9
 6 -7 -13 -5.6 19.3
 -6 -7 13 6.5 24.4
 -6 -7 13 -7.4 50.99
 6 -7 -13 2.6 6.9
 -7 8 0 13.7 13.8
 7 8 0 35.8 25.4
 -7 8 0 14.5 24.9
 -7 -8 0 18.5 15.1
 -7 -8 0 39.7 13.6
 7 -8 0 84.69 59.69
 7 -8 0 17.9 11.2
 -7 -8 0 39.4 54.49
 7 -8 0 31 25.8
 6 8 1 10.9 18.5
 -6 8 -1 1.4 17.4
 6 8 1 7.7 13.1
 -6 8 -1 11.5 10.7
 -6 -8 -1 -11 44.6
 -6 -8 -1 -0.4 7.6
 6 -8 1 -13.9 20.1
 6 -8 1 2.3 6.5
 -6 -8 -1 2.1 9.5
 6 -8 1 -47.8 35.2
 5 8 2 159.58 35.7
 -5 8 -2 145.89 31.6
 -5 8 -2 159.88 35.8
 5 8 2 142.89 45.8
 5 -8 2 160.48 27
 -5 -8 -2 153.88 28.2
 -5 -8 -2 165.68 66.09
 5 -8 2 121.09 48.2
 -5 -8 -2 184.88 37.6
 5 -8 2 222.68 54.79
 4 8 3 846.32 128.09
 4 8 3 979.8 137.49
 -4 -8 -3 1022.7 126.79
 4 -8 3 969.4 137.09
 4 -8 3 902.71 141.49
 -4 -8 -3 1069.59 133.99
 -4 -8 -3 705.43 160.78
 3 8 4 333.67 58.29
 -3 8 -4 301.17 48.9
 3 8 4 178.88 45.5
 -3 -8 -4 287.97 42
 -3 -8 -4 288.77 46.4
 3 -8 4 239.38 61.19
 3 -8 4 248.18 45.8
 -2 8 -5 873.51 146.99
 2 8 5 993.4 153.08
 -2 -8 -5 1149.08 149.99
 2 -8 5 1120.59 142.19
 2 -8 5 1214.68 142.19
 -1 8 -6 59.89 23
 1 8 6 56.39 16.2
 1 8 6 74.99 30.1
 -1 -8 -6 66.69 20.3
 1 -8 6 65.99 18.5
 -1 -8 -6 59.49 20.5
 0 8 7 -0.2 9.2
 0 -8 7 -28 25.4
 0 -8 7 5.2 17.1
 0 -8 -7 -22.7 14.8
 0 -8 -7 2.3 12.1
 -1 8 8 140.09 48.4
 -1 8 8 232.08 47
 -1 -8 8 250.87 52.29
 1 -8 -8 175.58 47.2
 1 -8 -8 195.68 40.7
 1 -8 -8 221.08 46.7
 -1 -8 8 229.08 56.69
 -2 8 9 2039.5 275.37
 -2 -8 9 2043.1 282.67
 -2 -8 9 2024.9 281.87
 2 -8 -9 1984.8 270.37
 2 -8 -9 1979.8 278.27
 -3 8 10 21.5 16.6
 -3 8 10 57.79 28.6
 -3 8 10 22.8 30.2
 3 -8 -10 41.4 35.2
 -3 -8 10 106.39 56.89
 3 -8 -10 73.99 31
 -3 -8 10 30.7 10.8
 -4 8 11 210.68 61.79
 -4 8 11 286.67 58.39
 4 8 -11 217.38 84.29
 -4 8 11 304.77 56.59
 4 -8 -11 274.87 68.79
 -4 -8 11 297.17 40
 -4 -8 11 277.77 82.09
 4 -8 -11 159.08 62.59
 -5 8 12 39.2 28.5
 -5 8 12 82.99 49.8
 -5 8 12 48.2 31.6
 -5 -8 12 201.28 40.6
 5 -8 -12 24.5 28.7
 5 -8 -12 38.4 18.2
 -5 -8 12 80.79 16.2
 -5 -8 12 28.5 50.59
 5 -8 -12 59.49 47.1
 -6 8 13 54.49 46.5
 -6 8 13 42.3 45.4
 6 -8 -13 26.7 33.1
 -6 -8 13 67.89 13.6
 -6 -8 13 30.5 27.1
 6 -8 -13 -3 56.29
 -6 -8 13 33.6 71.49
 6 -8 -13 43.2 12.9
 -7 9 0 93.39 31.9
 -7 9 0 76.19 22.4
 7 9 0 106.09 33.9
 -7 -9 0 101.29 29.7
 7 -9 0 103.89 61.59
 7 -9 0 159.58 44.5
 -7 -9 0 -15.2 56.79
 -7 -9 0 60.49 17.1
 7 -9 0 68.39 18.7
 7 -9 0 87.49 87.29
 6 9 1 475.85 91.19
 -6 9 -1 536.05 81.59
 -6 9 -1 507.35 80.19
 6 9 1 600.54 78.69
 -6 -9 -1 478.95 123.89
 6 -9 1 374.66 103.69
 6 -9 1 565.94 93.19
 -6 -9 -1 555.44 75.59
 -6 -9 -1 616.14 88.39
 6 -9 1 512.15 74.39
 5 9 2 159.38 41.3
 5 9 2 163.48 33.6
 -5 9 -2 204.28 37.5
 -5 9 -2 133.19 32.9
 5 -9 2 122.09 48.8
 -5 -9 -2 136.39 70.59
 -5 -9 -2 167.78 30
 5 -9 2 204.48 48.8
 -5 -9 -2 169.28 37.2
 5 -9 2 160.48 27.4
 4 9 3 112.99 36.4
 -4 9 -3 159.68 34.7
 4 9 3 121.69 30.6
 -4 -9 -3 161.28 71.89
 4 -9 3 170.18 43.6
 4 -9 3 189.38 48.3
 -4 -9 -3 158.38 32.4
 -4 -9 -3 159.78 32.9
 -3 9 -4 63.79 38.6
 3 9 4 50.19 19.1
 3 9 4 169.68 49
 3 -9 4 85.89 33.9
 -3 -9 -4 44.5 17.7
 3 -9 4 103.59 27.1
 -3 -9 -4 145.09 25.5
 2 9 5 583.84 102.89
 -2 9 -5 492.65 93.09
 2 -9 5 666.53 89.09
 -2 -9 -5 692.93 97.09
 2 -9 5 695.13 87.29
 2 -9 5 918.01 108.49
 1 9 6 325.07 45.4
 1 9 6 219.18 58.39
 1 -9 6 273.87 48.5
 -1 -9 -6 292.17 52.19
 -1 -9 -6 340.37 56.19
 0 9 7 782.02 142.49
 0 9 7 1080.89 129.89
 0 -9 7 948.01 134.99
 0 -9 -7 883.21 138.19
 0 -9 7 859.91 138.79
 0 -9 -7 1025.1 135.49
 -1 9 8 79.49 23.1
 -1 9 8 55.99 36.7
 1 -9 -8 80.69 24.8
 -1 -9 8 39.3 34.5
 -1 -9 8 67.49 35.8
 1 -9 -8 75.89 27.7
 -2 9 9 44.6 39.2
 -2 9 9 121.09 29.3
 -2 9 9 94.49 36.5
 2 -9 -9 111.69 42.3
 -2 -9 9 100.99 39.3
 -2 -9 9 44.3 47.8
 2 -9 -9 193.48 44
 2 -9 -9 90.79 36.8
 -3 9 10 54.69 29.6
 -3 9 10 18.8 55.89
 -3 9 10 112.49 41.4
 -3 9 10 37.8 19.9
 3 -9 -10 55.29 37.9
 3 -9 -10 16 29.8
 -3 -9 10 44.5 12.9
 -3 -9 10 44.5 54.89
 -3 -9 10 35.7 13.6
 -4 9 11 134.59 36
 -4 9 11 146.49 46.6
 -4 9 11 78.49 36.8
 4 -9 -11 162.48 54.69
 4 -9 -11 106.09 44
 -4 -9 11 139.39 66.79
 -4 -9 11 180.38 25.7
 -5 9 12 61.39 32.8
 -5 9 12 40.3 28.5
 -5 9 12 16.7 44.5
 5 -9 -12 33.4 31.2
 -5 -9 12 91.39 27.4
 -5 -9 12 143.09 63.89
 5 -9 -12 70.39 47.2
 5 -9 -12 39.7 10.9
 -5 -9 12 65.09 14.7
 -6 9 13 58.09 59.99
 -6 9 13 170.58 59.09
 -6 9 13 255.07 64.99
 6 -9 -13 152.38 49.4
 6 -9 -13 236.78 33.5
 -6 -9 13 382.06 94.89
 6 -9 -13 134.89 106.09
 -6 -9 13 213.88 50.79
 -6 -9 13 225.18 33.6
 -7 10 0 50.79 25.4
 -7 10 0 -16.7 14.3
 7 10 0 5 20.3
 -7 -10 0 72.79 30.3
 7 -10 0 59.29 27.7
 7 -10 0 -0.7 10.3
 7 -10 0 -46.9 74.59
 -7 -10 0 25.3 13.1
 -7 -10 0 28.1 66.49
 7 -10 0 10.7 49.6
 6 10 1 17.5 22.7
 -6 10 -1 0.2 10.9
 6 -10 1 17 9.8
 6 -10 1 29.9 26.7
 -6 -10 -1 -8.9 10.7
 6 -10 1 -26.6 40.9
 -6 -10 -1 31.8 60.39
 -6 -10 -1 10.8 11.1
 -5 10 -2 173.08 36.9
 5 10 2 178.38 33.7
 5 10 2 205.08 59.09
 5 -10 2 240.78 56.59
 -5 -10 -2 220.58 80.39
 5 -10 2 173.38 45.8
 -5 -10 -2 201.28 33.7
 5 -10 2 184.48 30.2
 -5 -10 -2 188.38 41.6
 -4 10 -3 -13.9 10
 4 10 3 18.8 10.7
 4 10 3 36.4 24.2
 4 -10 3 10.7 21.1
 4 -10 3 32.8 24.3
 -4 -10 -3 -34.2 53.49
 -4 -10 -3 -1 8.5
 -4 -10 -3 -8.7 7.7
 3 10 4 1493.75 197.18
 -3 10 -4 1455.55 184.48
 3 10 4 1135.09 179.68
 3 -10 4 1429.56 184.08
 -3 -10 -4 1461.25 187.88
 3 -10 4 1367.76 193.48
 -3 -10 -4 1401.36 181.88
 -2 10 -5 345.97 58.29
 1 10 6 331.97 84.99
 1 10 6 489.35 64.09
 1 -10 6 456.05 66.79
 -1 -10 -6 420.36 72.29
 0 10 7 28.2 11.8
 0 10 7 16.4 30.6
 0 -10 -7 44.8 21.8
 0 -10 7 65.59 36.5
 0 -10 -7 51.39 27.9
 0 -10 7 71.79 25.7
 -1 10 8 552.74 82.09
 -1 10 8 561.94 109.49
 1 -10 -8 367.96 99.09
 1 -10 -8 571.74 83.49
 -1 -10 8 496.35 102.29
 -1 -10 8 477.85 107.69
 1 -10 -8 571.14 93.59
 -2 10 9 -31.3 32.7
 -2 10 9 49.9 18
 -2 10 9 43.4 27.9
 2 -10 -9 23.1 28.9
 -2 -10 9 79.59 34.4
 2 -10 -9 26.5 27.1
 -2 -10 9 7.9 29.7
 2 -10 -9 -7.3 28.2
 -2 -10 9 58.09 50.99
 -3 10 10 2463.15 313.27
 -3 10 10 2001.8 319.87
 3 -10 -10 2150.68 327.07
 -3 -10 10 2168.58 307.67
 -3 -10 10 2961.1 344.77
 -3 -10 10 2587.04 306.67
 3 -10 -10 2473.35 326.47
 -4 10 11 83.69 37.2
 -4 10 11 199.98 46.2
 -4 10 11 140.29 36.3
 4 -10 -11 147.69 53.79
 -4 -10 11 139.79 24.3
 -4 -10 11 54.79 61.59
 4 -10 -11 73.49 34.9
 -5 10 12 60.89 39.6
 -5 10 12 110.39 37.3
 -5 10 12 132.49 42.8
 5 -10 -12 95.79 19.3
 -5 -10 12 117.69 34.4
 -5 -10 12 211.48 78.79
 5 -10 -12 146.79 44.5
 5 -10 -12 63.59 49.8
 -5 -10 12 99.49 21.5
 -6 10 13 34 34.5
 -6 10 13 -1.3 41.3
 -6 10 13 22.8 28.6
 6 -10 -13 -1 25.2
 6 -10 -13 35.9 50.79
 -6 -10 13 9.8 9.4
 6 -10 -13 19.6 9.2
 -6 -10 13 139.39 72.59
 -6 -10 13 -6.6 23
 7 11 0 241.88 71.09
 -7 11 0 246.68 59.09
 7 -11 0 150.48 104.69
 -7 -11 0 345.67 101.39
 7 -11 0 290.47 80.59
 7 -11 0 241.28 44.2
 -7 -11 0 401.86 72.79
 -6 11 -1 177.38 40.7
 6 11 1 158.88 48.2
 -6 -11 -1 241.68 47.6
 6 -11 1 155.98 49.1
 6 -11 1 50.49 80.09
 -6 -11 -1 285.87 94.89
 6 -11 1 211.88 32.6
 -6 -11 -1 194.08 34.7
 6 -11 1 214.78 65.19
 -5 11 -2 297.57 49.9
 5 11 2 269.77 68.89
 5 -11 2 249.08 62.59
 -5 -11 -2 265.57 50.59
 5 -11 2 252.57 61.99
 -5 -11 -2 298.37 95.19
 -5 -11 -2 212.08 41
 4 11 3 132.29 44.1
 4 11 3 141.49 28
 -4 11 -3 135.09 29.5
 4 -11 3 144.59 39
 4 -11 3 146.79 43.5
 -4 -11 -3 201.88 37.4
 -4 -11 -3 157.78 82.69
 -4 -11 -3 186.58 32.8
 3 11 4 107.19 21.2
 3 11 4 50.39 33
 3 -11 4 153.68 35.9
 -3 -11 -4 142.09 32.1
 3 -11 4 117.19 40.9
 -3 -11 -4 116.29 25.4
 2 11 5 177.28 52.59
 -2 -11 -5 158.08 46.6
 2 -11 5 246.08 37.3
 2 -11 5 165.68 45.8
 1 11 6 421.46 96.89
 1 11 6 445.56 66.79
 -1 -11 -6 490.75 79.39
 -1 -11 -6 571.74 80.99
 1 -11 6 442.96 67.59
 0 11 7 758.52 95.99
 0 11 7 502.15 118.49
 0 -11 7 608.24 104.69
 0 -11 -7 590.84 110.39
 0 -11 -7 851.61 112.89
 0 -11 7 688.13 120.39
 -1 11 8 229.58 79.99
 -1 11 8 485.85 62.99
 -1 11 8 376.86 65.49
 -1 -11 8 365.26 89.99
 1 -11 -8 420.46 84.29
 1 -11 -8 506.45 70.79
 1 -11 -8 385.86 90.99
 -1 -11 8 480.35 94.89
 -2 11 9 195.38 39.7
 -2 11 9 55.59 51.09
 -2 11 9 116.59 37.2
 -2 -11 9 168.68 73.39
 2 -11 -9 393.66 73.59
 -2 -11 9 404.66 78.09
 -2 -11 9 263.87 66.59
 2 -11 -9 153.28 45.1
 2 -11 -9 154.18 52.39
 -3 11 10 -5.3 51.49
 -3 11 10 38.5 19.7
 -3 11 10 51.39 32.5
 3 -11 -10 21.2 27.5
 -3 -11 10 41.2 14.1
 -3 -11 10 28.6 52.59
 3 -11 -10 17.6 31.5
 -4 11 11 101.29 45.4
 -4 11 11 126.99 37.3
 -4 -11 11 124.29 25.7
 4 -11 -11 97.59 41.7
 4 -11 -11 80.29 48
 -4 -11 11 151.48 34.9
 -4 -11 11 221.88 79.49
 -5 11 12 142.19 41.7
 -5 11 12 209.78 48.7
 -5 -11 12 136.39 27
 5 -11 -12 158.18 54.59
 5 -11 -12 74.19 46
 -5 -11 12 194.78 44.8
 -5 -11 12 179.28 85.29
 -6 11 13 100.69 39.6
 -6 11 13 88.09 41.7
 -6 11 13 131.09 45.4
 6 -11 -13 86.59 40.3
 6 -11 -13 115.89 22.8
 -6 -11 13 272.87 95.09
 6 -11 -13 90.99 54.89
 -6 -11 13 146.99 24.4
 -6 -11 13 82.49 36.4
 -6 12 -1 -3.3 15.2
 6 12 1 35.1 33.3
 -6 -12 -1 36 19.7
 -6 -12 -1 11.5 66.29
 6 -12 1 -16.3 41.3
 -6 -12 -1 55.19 21.7
 6 -12 1 2.2 86.89
 6 -12 1 2.9 8.9
 -5 12 -2 10.9 14.9
 5 12 2 35 32.4
 5 -12 2 62.59 37.9
 -5 -12 -2 15.8 11.6
 -5 -12 -2 14.4 12.3
 -5 -12 -2 30 64.79
 5 -12 2 84.99 32.4
 4 12 3 542.55 112.19
 4 -12 3 675.93 98.79
 -4 -12 -3 509.45 135.99
 -4 -12 -3 650.93 90.89
 -4 -12 -3 697.23 97.39
 3 12 4 45.9 33.9
 3 12 4 60.39 15.8
 3 -12 4 72.69 24.5
 3 -12 4 56.99 30.2
 -3 -12 -4 62.69 19.7
 2 12 5 640.24 144.39
 -2 -12 -5 1038.6 131.59
 2 -12 5 963.4 120.59
 2 -12 5 641.04 129.89
 -2 -12 -5 953.5 128.79
 1 12 6 47.8 42.4
 -1 -12 -6 68.99 26.8
 -1 -12 -6 95.79 29
 1 -12 6 68.99 31.7
 1 -12 6 63.09 16.6
 0 12 7 4.4 10.2
 0 12 7 11.6 37.6
 0 12 7 -3.4 5.8
 0 -12 7 12.6 20.9
 0 -12 7 -17.5 43.9
 0 -12 7 9.5 55.59
 0 -12 -7 50.09 29.3
 0 -12 -7 2.9 22
 -1 12 8 -0.5 38.7
 -1 12 8 42.4 14.9
 -1 12 8 27.1 15.2
 -1 -12 8 46.2 49.99
 1 -12 -8 48 26.6
 1 -12 -8 39 33.1
 -1 -12 8 125.19 38.8
 1 -12 -8 66.79 37
 -1 -12 8 68.79 56.39
 -2 12 9 820.02 114.99
 -2 12 9 782.92 118.29
 2 -12 -9 832.52 131.79
 -2 -12 9 720.83 149.39
 2 -12 -9 781.92 136.09
 2 -12 -9 779.42 126.99
 -2 -12 9 951.7 138.39
 -3 12 10 -22.4 60.59
 -3 12 10 94.59 35.9
 -3 12 10 79.79 31.1
 -3 -12 10 59.59 64.49
 -3 -12 10 85.89 21.8
 3 -12 -10 116.29 45.7
 3 -12 -10 104.69 41.7
 -3 -12 10 110.39 29.9
 -4 12 11 397.46 74.69
 -4 12 11 336.17 89.39
 -4 -12 11 361.66 59.69
 -4 -12 11 621.04 131.49
 4 -12 -11 392.16 90.69
 4 -12 -11 538.05 95.79
 -5 12 12 12.8 24.5
 -5 12 12 20.9 34.6
 -5 -12 12 -10.7 8.4
 -5 -12 12 -24.7 59.59
 5 -12 -12 11.2 29.8
 5 -12 -12 15.7 41.7
 -5 -12 12 -3.3 17
 -6 12 13 14 26.8
 -6 12 13 52.99 36.1
 -6 12 13 52.99 39.5
 -6 -12 13 7.4 24
 6 -12 -13 4.7 8
 -6 -12 13 51.89 101.39
 -6 -12 13 -5.2 8.3
 6 -12 -13 -3.6 29.1
 6 -12 -13 32.4 48.1
 6 13 1 94.89 43.7
 -6 -13 -1 151.88 33
 6 -13 1 177.38 60.39
 6 -13 1 154.38 28
 -6 -13 -1 181.78 45.2
 6 -13 1 224.08 57.59
 -6 -13 -1 134.89 135.99
 6 -13 1 16.5 94.09
 5 13 2 206.88 60.99
 5 -13 2 104.59 90.39
 5 -13 2 318.27 65.49
 -5 -13 -2 308.67 45
 5 -13 2 306.47 64.79
 -5 -13 -2 237.68 49.8
 -5 -13 -2 201.18 96.59
 4 13 3 -16 30.3
 4 -13 3 28.9 24.8
 4 -13 3 -4.2 22.4
 -4 -13 -3 -7.4 11
 -4 -13 -3 -1.6 10.2
 3 13 4 0.2 33.3
 -3 -13 -4 -10 9.4
 3 -13 4 10.8 23
 3 -13 4 23.8 21.6
 -3 -13 -4 -1 13.4
 2 13 5 -15.8 31.9
 2 -13 5 22.2 19.3
 -2 -13 -5 41.3 22.3
 2 -13 5 37.9 27
 -2 -13 -5 7.4 17.4
 1 13 6 468.15 134.39
 1 -13 6 649.24 114.29
 -1 -13 -6 824.52 119.39
 1 -13 6 760.72 164.28
 -1 -13 -6 964.3 120.09
 0 13 7 1.3 41
 0 13 7 108.69 24.2
 0 13 7 103.49 21
 0 -13 7 46.5 55.29
 0 -13 7 17.5 65.99
 0 -13 7 46.9 25.3
 0 -13 -7 73.59 33.2
 0 -13 -7 123.49 39.4
 -1 13 8 831.42 114.29
 -1 13 8 728.03 112.19
 -1 -13 8 788.92 133.89
 1 -13 -8 659.23 137.39
 1 -13 -8 904.71 122.49
 1 -13 -8 933.41 138.39
 -1 -13 8 945.91 151.38
 -2 13 9 -14.5 53.59
 -2 13 9 23.2 18.5
 2 -13 -9 56.99 30.8
 -2 -13 9 32.6 31.4
 2 -13 -9 33.6 35.7
 -2 -13 9 59.19 34.9
 -2 -13 9 80.39 59.69
 -3 13 10 1.6 19.2
 -3 13 10 -49.2 52.69
 -3 13 10 -24.3 18
 -3 -13 10 30.4 18.9
 3 -13 -10 -16.1 27
 -3 -13 10 -11.8 62.19
 3 -13 -10 34.2 35.1
 -4 13 11 0.3 18.7
 -4 13 11 -9.8 29.3
 4 -13 -11 43.5 33.5
 4 -13 -11 2.1 32.9
 -4 -13 11 -46.3 58.29
 -4 -13 11 22.6 13.3
 -4 -13 11 16.4 14.7
 -5 13 12 274.47 77.99
 -5 13 12 416.86 83.99
 5 -13 -12 444.56 99.59
 -5 -13 12 483.25 74.69
 -5 -13 12 444.76 63.89
 -5 -13 12 563.44 139.69
 5 -13 -12 488.15 99.49
 6 -13 -13 93.79 18.7
 -6 -13 13 49.3 16.6
 6 14 1 -40.8 34.3
 6 -14 1 -16.5 78.39
 6 -14 1 -3.5 6.3
 -6 -14 -1 -21.2 13.2
 6 -14 1 -13.5 28.6
 -6 -14 -1 -7.6 11.7
 -6 -14 -1 -33.6 67.19
 6 -14 1 29.6 40.1
 5 14 2 200.38 62.09
 -5 -14 -2 217.28 43.7
 5 -14 2 208.18 54.69
 5 -14 2 401.66 70.39
 5 -14 2 139.19 99.79
 -5 -14 -2 317.57 54.09
 -5 -14 -2 184.28 91.59
 4 14 3 185.98 60.09
 -4 -14 -3 270.37 50.19
 4 -14 3 223.68 54.89
 -4 -14 -3 224.98 44.4
 4 -14 3 234.28 98.69
 4 -14 3 282.17 56.79
 3 14 4 617.94 116.99
 3 -14 4 454.75 131.19
 2 14 5 12 40.2
 -2 -14 -5 58.39 26.5
 2 -14 5 20.7 19.1
 2 -14 5 25.6 71.29
 -2 -14 -5 49.99 24.1
 2 -14 5 52.79 27.7
 1 14 6 44.6 15.2
 1 14 6 -12.5 36.6
 1 -14 6 15.7 26.5
 1 -14 6 9.2 69.39
 -1 -14 -6 36 23.4
 -1 -14 -6 21.8 26.1
 0 14 7 12.8 46
 0 14 7 8 7.6
 0 14 7 20.7 13.3
 0 -14 -7 14.2 28.8
 0 -14 7 74.29 64.79
 0 -14 -7 22.7 28.8
 -1 14 8 102.49 53.79
 -1 14 8 202.68 37.2
 -1 14 8 168.78 30.9
 -1 -14 8 111.59 64.59
 -1 -14 8 110.69 51.69
 1 -14 -8 227.18 50.99
 -1 -14 8 141.69 45
 1 -14 -8 167.68 49.8
 -2 14 9 38.4 59.19
 -2 14 9 63.39 24.1
 -2 14 9 58.19 19.3
 2 -14 -9 110.69 37.3
 2 -14 -9 57.19 33.9
 -2 -14 9 65.59 38.7
 -2 -14 9 61.09 41.7
 -2 -14 9 82.79 62.19
 2 -14 -9 79.69 44.5
 -3 14 10 718.83 122.59
 -3 14 10 866.51 123.79
 3 -14 -10 842.42 132.59
 -3 -14 10 1006.2 174.28
 -3 -14 10 816.42 122.59
 3 -14 -10 843.52 144.59
 -4 14 11 54.39 31.4
 -4 14 11 26.2 24.8
 -4 -14 11 21.7 14.8
 -4 -14 11 7.7 62.79
 4 -14 -11 37.9 39.2
 4 -14 -11 -0.2 29.5
 -4 -14 11 44.1 18.3
 -5 14 12 34.7 40.5
 -5 14 12 21 40.9
 -5 -14 12 59.49 16.7
 5 -14 -12 53.89 40.9
 5 -14 -12 56.69 53.69
 -5 -14 12 40.7 23.9
 -5 -14 12 136.29 88.89
 6 15 1 184.08 71.89
 -6 -15 -1 270.07 58.49
 -6 -15 -1 267.07 52.79
 6 -15 1 308.47 71.79
 -6 -15 -1 107.79 89.99
 6 -15 1 313.77 67.79
 6 -15 1 33.6 87.79
 5 15 2 0.9 38.4
 -5 -15 -2 14.1 16.9
 5 -15 2 12.1 26.1
 -5 -15 -2 1.3 13.3
 -5 -15 -2 -91.49 62.59
 5 -15 2 21.7 26
 5 -15 2 -24.2 77.99
 4 15 3 -10.1 45.2
 -4 -15 -3 80.09 24.1
 -4 -15 -3 40.9 20.9
 4 -15 3 96.09 33.3
 4 -15 3 86.69 36.7
 4 -15 3 -24.4 77.99
 3 15 4 -14.6 64.59
 3 -15 4 29.5 77.79
 3 -15 4 44.3 26.1
 -3 -15 -4 24.1 18.3
 3 -15 4 31.1 26.2
 2 15 5 110.49 62.49
 -2 -15 -5 169.08 60.09
 2 -15 5 138.59 41.1
 -2 -15 -5 116.69 36.3
 2 -15 5 152.78 35.5
 2 -15 5 190.38 88.79
 1 15 6 128.79 52.19
 1 15 6 26.1 11.3
 -1 -15 -6 22.6 22.8
 -1 -15 -6 -7.3 18.8
 1 -15 6 37.3 25.5
 1 -15 6 -17.1 78.89
 0 15 7 1096.09 140.59
 0 15 7 1206.28 141.09
 0 -15 -7 799.52 153.48
 0 -15 -7 1157.48 164.48
 0 -15 7 1013.9 149.29
 0 -15 7 836.72 146.89
 -1 15 8 109.09 27.7
 -1 15 8 157.68 24.4
 -1 15 8 12.5 54.79
 1 -15 -8 118.19 34.9
 1 -15 -8 86.99 43
 -1 -15 8 72.99 37.9
 -1 -15 8 48.5 43.3
 -1 -15 8 93.89 61.69
 1 -15 -8 113.19 44.7
 -2 15 9 222.98 87.59
 -2 15 9 374.56 53.39
 -2 15 9 370.26 62.79
 2 -15 -9 321.27 69.09
 -2 -15 9 416.86 110.49
 -2 -15 9 375.86 82.09
 2 -15 -9 307.77 93.59
 -2 -15 9 248.38 74.79
 -3 15 10 -10.8 13.1
 -3 15 10 -15.5 16
 3 -15 -10 21.1 32.2
 -3 -15 10 -18.6 17.3
 -3 -15 10 -42.6 31.9
 3 -15 -10 3.2 34.3
 -3 -15 10 88.89 73.99
 -4 15 11 123.59 39.4
 -4 15 11 260.37 58.09
 -4 -15 11 193.88 39.7
 4 -15 -11 179.38 62.99
 4 -15 -11 184.88 61.59
 -4 -15 11 253.27 94.29
 -4 -15 11 141.99 34.1
 -5 15 12 -13.4 26.8
 -5 15 12 -17.1 29.8
 5 -15 -12 0.4 36.5
 -5 -15 12 15.6 22.4
 -5 -15 12 14.1 13.3
 5 -15 -12 95.59 56.69
 -5 -15 12 20.8 68.59
 5 16 2 30.2 44.4
 -5 -16 -2 49.6 20.3
 -5 -16 -2 76.59 29
 -5 -16 -2 -24.5 66.69
 5 -16 2 69.49 37.2
 5 -16 2 100.69 89.99
 5 -16 2 78.49 36.2
 4 16 3 261.97 84.49
 4 -16 3 173.38 102.79
 4 -16 3 477.35 77.79
 4 -16 3 559.24 78.19
 -4 -16 -3 352.56 62.79
 -4 -16 -3 389.26 69.59
 3 16 4 50.39 47.6
 -3 -16 -4 80.29 27
 3 -16 4 73.09 30.7
 3 -16 4 104.99 32.1
 3 -16 4 49.7 75.29
 2 16 5 64.59 50.79
 2 -16 5 200.98 40.8
 2 -16 5 206.78 97.89
 -2 -16 -5 223.28 55.59
 -2 -16 -5 157.38 40.9
 2 -16 5 131.49 39.3
 1 16 6 18.2 42.9
 1 16 6 101.99 23.8
 1 -16 6 135.59 35.9
 -1 -16 -6 83.59 33.6
 -1 -16 -6 91.19 34.6
 1 -16 6 17 75.69
 0 16 7 17.3 13.3
 0 16 7 6.3 40.2
 0 -16 -7 -26.1 23.4
 0 -16 7 17.8 23
 0 -16 7 3.1 42.1
 0 -16 -7 -9.2 25.7
 0 -16 7 -24.7 23.5
 -1 16 8 35.1 11
 -1 16 8 40.9 54.69
 -1 16 8 58.19 22.2
 1 -16 -8 39.6 34
 -1 -16 8 -5.9 40.4
 -1 -16 8 64.49 61.09
 1 -16 -8 73.79 44.3
 1 -16 -8 10.2 28.6
 -1 -16 8 146.29 40.9
 -2 16 9 302.57 57.79
 -2 16 9 352.46 47.8
 -2 16 9 147.79 84.29
 -2 -16 9 174.98 80.89
 -2 -16 9 322.77 84.99
 2 -16 -9 231.28 72.59
 -2 -16 9 283.27 69.79
 2 -16 -9 399.86 72.89
 -3 16 10 423.66 69.79
 -3 16 10 447.16 77.69
 -3 -16 10 455.75 109.59
 -3 -16 10 422.86 79.49
 3 -16 -10 404.86 85.89
 -3 -16 10 483.05 124.49
 3 -16 -10 452.25 102.49
 -4 16 11 81.29 26.6
 -4 16 11 99.69 39.2
 -4 -16 11 86.59 24.3
 4 -16 -11 157.78 55.09
 4 -16 -11 34.9 40.7
 -4 -16 11 149.59 95.59
 -4 -16 11 124.99 31.8
 -5 16 12 29.2 32.1
 -5 16 12 0.9 29.3
 -5 -16 12 96.09 24.2
 5 -16 -12 74.49 44.8
 -5 -16 12 105.19 27
 -5 -16 12 17.1 73.39
 5 -16 -12 75.39 45
 5 -17 2 424.16 96.19
 -5 -17 -2 255.57 55.39
 -5 -17 -2 381.26 69.59
 -5 -17 -2 144.39 102.09
 5 -17 2 328.77 73.19
 4 17 3 27.5 46.6
 4 -17 3 -35.9 71.99
 4 -17 3 21.8 26.5
 -4 -17 -3 -19 13.3
 -4 -17 -3 14.6 20.6
 4 -17 3 33.4 29.6
 3 17 4 92.59 55.79
 3 -17 4 94.39 80.59
 3 -17 4 247.18 48.8
 3 -17 4 153.98 40.7
 -3 -17 -4 120.89 35.9
 2 17 5 4.4 40.7
 2 -17 5 18.5 22.8
 -2 -17 -5 -12.8 18.6
 -2 -17 -5 -14.1 16.7
 2 -17 5 -13.7 18.6
 2 -17 5 29.6 79.59
 1 17 6 402.26 61.09
 1 17 6 265.97 89.69
 1 -17 6 650.23 81.39
 -1 -17 -6 484.25 93.69
 -1 -17 -6 553.64 90.49
 1 -17 6 397.96 115.59
 0 17 7 -5.6 14.8
 0 17 7 -32 49.5
 0 -17 -7 64.49 33.6
 0 -17 7 24.3 22.2
 0 -17 7 4.4 47
 0 -17 -7 67.99 35.1
 -1 17 8 778.32 109.39
 -1 17 8 848.42 103.19
 -1 -17 8 669.33 108.49
 1 -17 -8 797.12 117.99
 -1 -17 8 777.32 127.19
 1 -17 -8 921.81 143.09
 -1 -17 8 472.05 139.79
 1 -17 -8 615.34 128.99
 -1 -17 8 578.94 187.58
 -2 17 9 1.7 20.6
 -2 17 9 3.7 7.1
 -2 17 9 -29.1 56.09
 -2 -17 9 -9 30.1
 -2 -17 9 1.9 27.6
 2 -17 -9 5.3 41
 -2 -17 9 -57.19 55.79
 2 -17 -9 -0.2 30
 -3 17 10 24 26.3
 -3 17 10 13.2 12
 -3 -17 10 -13.5 68.89
 3 -17 -10 -7.7 33.6
 3 -17 -10 1.7 39.4
 -3 -17 10 -10.6 34.2
 -3 -17 10 13.5 24.6
 -4 17 11 -22.4 15.1
 -4 17 11 20.4 27.2
 4 -17 -11 47.9 42.1
 -4 -17 11 9 43.2
 -4 -17 11 -17.2 15.7
 -4 -17 11 172.18 144.89
 -4 -17 11 -9.3 14
 5 18 2 -1.5 42.9
 -5 -18 -2 26.7 23.5
 5 -18 2 48.7 35.2
 5 -18 2 25.9 32.5
 4 18 3 129.69 60.19
 4 -18 3 22.6 79.69
 4 -18 3 122.39 40.7
 -4 -18 -3 105.79 31.4
 -4 -18 -3 101.79 34
 4 -18 3 255.37 60.39
 3 18 4 16 48.1
 -3 -18 -4 83.79 35.2
 3 -18 4 -44.5 75.19
 3 -18 4 193.88 43.2
 3 -18 4 144.69 38.9
 2 18 5 198.88 75.89
 2 -18 5 357.66 65.09
 -2 -18 -5 286.67 73.09
 -2 -18 -5 327.87 73.49
 2 -18 5 389.66 61.69
 1 18 6 -1.1 44.2
 1 -18 6 32.6 20.6
 -1 -18 -6 4 32.7
 1 -18 6 5.6 55.59
 -1 -18 -6 9.9 25.7
 0 18 7 40.6 56.59
 0 18 7 16.8 17.7
 0 -18 7 -54.19 35.9
 0 -18 -7 11.9 33
 0 -18 7 -6.9 18.1
 0 -18 7 47 27.6
 0 -18 -7 22.9 28.6
 -1 18 8 77.99 30.5
 -1 18 8 59.29 67.19
 1 -18 -8 115.09 40.3
 -1 -18 8 120.79 42.2
 -1 -18 8 99.59 59.79
 1 -18 -8 95.49 49.2
 1 -18 -8 116.29 45.1
 -1 -18 8 71.59 59.59
 -1 -18 8 133.99 30.7
 -2 18 9 436.76 59.89
 -2 -18 9 573.84 135.99
 2 -18 -9 414.06 109.69
 -2 -18 9 355.66 101.69
 -2 -18 9 396.56 65.39
 2 -18 -9 434.96 85.39
 -2 -18 9 365.16 83.09
 -3 18 10 143.49 29.2
 -3 18 10 152.58 45.5
 3 -18 -10 167.08 65.89
 -3 -18 10 187.98 55.89
 3 -18 -10 145.59 51.99
 -3 -18 10 283.57 103.89
 -3 -18 10 169.98 28.5
 -3 -18 10 110.49 41.7
 -4 18 11 238.38 47.9
 -4 18 11 203.68 59.29
 4 -18 -11 350.96 87.69
 4 -18 -11 215.98 71.99
 -4 -18 11 344.67 48.5
 -4 -18 11 253.97 52.89
 -4 -18 11 109.09 94.99
 -4 -18 11 195.08 78.79
 4 19 3 39 52.49
 4 -19 3 2.2 60.19
 4 -19 3 40.9 32.7
 -4 -19 -3 10 22.2
 -4 -19 -3 22.5 23.8
 3 19 4 -25.8 47.5
 3 -19 4 -20.9 25.5
 3 -19 4 4.1 22.8
 3 -19 4 -35.3 66.49
 -3 -19 -4 16.3 25.2
 2 19 5 124.09 68.09
 2 -19 5 105.09 77.89
 2 -19 5 238.38 59.79
 2 -19 5 228.18 52.09
 -2 -19 -5 294.97 68.19
 1 19 6 -44 49.7
 -1 -19 -6 -30 32.2
 1 -19 6 31.6 57.29
 -1 -19 -6 7.8 24.7
 1 -19 6 23.3 20.7
 0 19 7 419.66 60.99
 0 19 7 321.57 101.19
 0 -19 7 311.77 99.39
 0 -19 -7 339.07 84.39
 -1 19 8 41.1 72.49
 -1 19 8 37.9 24
 1 -19 -8 40.5 35.1
 1 -19 -8 58.89 35.6
 1 -19 -8 48.2 42.1
 -1 -19 8 44.8 38.1
 -1 -19 8 44.3 57.89
 -1 -19 8 36.7 51.69
 -1 -19 8 64.89 22.8
 -2 19 9 60.99 29.7
 -2 -19 9 36.2 39.7
 2 -19 -9 92.29 55.79
 -2 -19 9 34.3 72.49
 2 -19 -9 80.39 42.7
 -2 -19 9 49.3 46
 -2 -19 9 43.4 20.6
 -3 19 10 31.5 27.9
 -3 19 10 2.1 8
 -3 -19 10 -0.9 32.8
 3 -19 -10 -22 39.6
 -3 -19 10 -24.3 70.09
 -3 -19 10 -32.1 25.2
 3 -19 -10 36.6 39.2
 -4 -19 11 21.1 38.9
 4 20 3 -32 55.39
 4 -20 3 4.9 27.4
 -4 -20 -3 -5.3 23.3
 4 -20 3 36.8 33.2
 3 -20 4 469.15 76.29
 3 -20 4 412.56 77.39
 -3 -20 -4 439.56 90.09
 3 -20 4 175.68 96.59
 2 20 5 4.2 64.69
 2 -20 5 115.59 34
 -2 -20 -5 55.99 36.7
 -2 -20 -5 47.2 33.4
 2 -20 5 29.4 65.89
 2 -20 5 72.39 33.1
 1 20 6 28.9 69.79
 1 -20 6 202.98 46.1
 -1 -20 -6 112.19 44
 1 -20 6 142.19 78.89
 -1 -20 -6 202.48 56.19
 0 20 7 45.7 70.79
 0 -20 7 19.1 56.79
 0 -20 7 8.1 17.8
 0 -20 -7 -0.1 32.7
 0 -20 -7 18.1 30
 0 -20 -7 -12.7 28.6
 -1 20 8 137.79 85.69
 -1 20 8 134.59 38.7
 1 -20 -8 156.18 49.7
 -1 -20 8 152.68 76.59
 -1 -20 8 210.48 79.89
 -1 -20 8 200.88 38.2
 1 -20 -8 168.68 64.69
 -1 -20 8 200.38 52.99
 1 -20 -8 172.58 46.4
 -2 20 9 60.29 30.6
 -2 -20 9 53.29 39.3
 2 -20 -9 86.89 55.69
 -2 -20 9 -1.7 69.59
 -2 -20 9 15.3 39.5
 2 -20 -9 23.9 48.8
 -3 20 10 287.87 78.39
 -3 -20 10 450.95 86.79
 -3 -20 10 468.25 129.49
 3 -20 -10 452.45 90.49
 -3 -20 10 278.67 78.89
 3 -20 -10 422.56 115.49
 3 21 4 -41.3 63.39
 3 -21 4 21.7 26.7
 3 -21 4 76.19 33.9
 -3 -21 -4 -57.59 24
 3 -21 4 -53.09 55.69
 2 21 5 29.4 73.69
 -2 -21 -5 48.8 35.7
 2 -21 5 27.6 23.5
 2 -21 5 54.09 33.5
 2 -21 5 -45.3 55.79
 -2 -21 -5 53.49 37.6
 1 21 6 74.69 83.79
 1 -21 6 232.58 52.79
 1 -21 6 203.68 92.19
 -1 -21 -6 387.46 81.29
 -1 -21 -6 234.38 68.69
 0 21 7 98.79 132.79
 0 -21 -7 79.09 54.49
 0 -21 7 112.49 28.7
 0 -21 -7 91.19 39.7
 0 -21 7 90.79 74.89
 0 -21 -7 133.59 60.59
 -1 21 8 31.2 75.79
 -1 21 8 120.69 40.8
 -1 -21 8 197.58 88.09
 1 -21 -8 277.77 61.69
 1 -21 -8 212.58 59.79
 -1 -21 8 219.68 37.8
 -1 -21 8 257.77 35.2
 1 -21 -8 266.87 80.09
 -1 -21 8 129.29 69.49
 -1 -21 8 121.79 43.4
 -2 21 9 41.1 31.6
 -2 -21 9 71.69 49
 -2 -21 9 98.79 47.6
 2 -21 -9 76.19 53.09
 2 -21 -9 98.79 44.1
 -2 -21 9 142.99 81.79
 2 22 5 35.1 95.69
 2 -22 5 210.38 92.49
 -2 -22 -5 201.08 60.69
 2 -22 5 275.17 55.79
 2 -22 5 337.37 67.59
 -2 -22 -5 438.96 85.99
 1 22 6 21.1 69.29
 1 -22 6 4.7 63.29
 1 -22 6 7.6 21.1
 -1 -22 -6 9 31
 -1 -22 -6 7.8 36.2
 0 22 7 78.29 76.49
 0 -22 7 32.9 65.59
 0 -22 7 -18.1 17
 0 -22 7 71.19 66.59
 0 -22 -7 -24.3 30.4
 0 -22 -7 17.9 36.2
 0 -22 -7 -19.6 33.2
 1 -22 -8 -35 33.2
 -1 -22 8 -10.6 56.69
 -1 -22 8 30.9 51.29
 -1 -22 8 6.5 9.3
 1 -22 -8 -26.8 35.7
 -1 -22 8 10.4 27.3
 1 23 6 85.69 84.99
 -1 -23 -6 346.57 83.79
 1 -23 6 278.17 47.8
 -1 -23 -6 125.09 53.19
 1 -23 6 170.98 93.99
 0 23 7 2.8 85.99
 0 -23 7 78.19 21.7
 0 -23 7 -41.6 56.89
 0 -23 7 58.39 66.79
 0 -23 -7 71.09 39.6
 -8 0 0 3.3 16.1
 8 0 0 11.1 21
 -8 0 0 30.2 34.4
 7 0 1 -8.5 12
 -7 0 -1 -9.7 10.1
 7 0 1 -4.9 23.6
 -7 0 -1 11.3 31.3
 6 0 2 445.76 70.49
 6 0 2 507.25 82.59
 -6 0 -2 457.75 87.39
 -6 0 -2 542.55 77.99
 -5 0 -3 -32.6 20.6
 5 0 3 -3.4 17.8
 -5 0 -3 -5.2 5.5
 4 0 4 796.12 135.89
 -4 0 -4 913.51 135.79
 4 0 4 1007.1 124.59
 -4 0 -4 983.4 129.79
 -3 0 -5 -0.1 2.9
 -3 0 -5 7.5 18.1
 3 0 5 -0.4 4.2
 -3 0 -5 -8 5.8
 2 0 6 230.88 33.3
 2 0 6 243.38 37.9
 -2 0 -6 198.48 45.9
 -2 0 -6 235.98 32
 -1 0 -7 -2.9 2.4
 -1 0 -7 -7.2 6.9
 0 0 -8 1199.28 202.98
 0 0 8 1496.95 207.88
 0 0 -8 1479.05 195.18
 0 0 8 1654.43 194.08
 -1 0 9 -54.79 17.5
 1 0 -9 -26.3 28.3
 -1 0 9 -19 20.4
 -1 0 9 -8.6 10.8
 -2 0 10 1675.13 233.08
 2 0 -10 1881.81 225.58
 2 0 -10 1773.32 239.58
 -2 0 10 1833.42 236.58
 -2 0 10 1479.45 247.48
 -3 0 11 -30.1 25.2
 3 0 -11 -1.5 5.5
 -3 0 11 67.19 41.7
 -3 0 11 -9 20.2
 3 0 -11 -24.4 31.4
 -4 0 12 342.67 74.29
 4 0 -12 222.18 74.69
 4 0 -12 340.67 44.6
 -4 0 12 233.28 67.19
 5 0 -13 -3.8 9.2
 -5 0 13 43.2 39.7
 -5 0 13 -2.7 31.5
 -5 0 13 31.9 20.7
 5 0 -13 -60.09 39.5
 -6 0 14 214.88 71.19
 -6 0 14 363.86 80.29
 6 0 -14 148.09 82.39
 -6 0 14 243.98 59.79
 6 0 -14 276.87 44.6
 -7 0 15 12.4 26.2
 -7 0 15 22.5 47.1
 7 0 -15 -6.4 63.49
 -8 1 0 343.47 59.59
 8 1 0 211.28 56.19
 -8 1 0 298.17 70.59
 -8 -1 0 223.98 55.89
 -8 -1 0 304.57 74.89
 8 -1 0 239.18 58.69
 7 1 1 400.86 62.89
 -7 1 -1 539.85 71.99
 7 1 1 330.67 72.79
 -7 1 -1 241.28 70.79
 7 -1 1 362.16 75.59
 -7 -1 -1 476.65 71.19
 7 -1 1 391.76 61.69
 -7 -1 -1 439.46 84.29
 6 1 2 201.88 38.1
 6 1 2 176.88 45
 -6 1 -2 237.88 42.9
 -6 1 -2 240.08 56.19
 6 -1 2 252.47 37.2
 -6 -1 -2 145.59 48.1
 6 -1 2 193.18 46.7
 -6 -1 -2 204.58 42.3
 5 1 3 130.89 30
 -5 1 -3 154.68 30.4
 5 1 3 146.79 39
 -5 1 -3 97.19 36.4
 5 -1 3 104.09 28.8
 -5 -1 -3 123.89 45.5
 5 -1 3 79.49 34.1
 -5 -1 -3 158.08 30.6
 -4 1 -4 47.6 23.6
 -4 1 -4 39.5 14.6
 4 1 4 51.69 12.7
 4 1 4 13.6 21.8
 4 -1 4 19.6 26.1
 -4 -1 -4 29.7 8.1
 4 -1 4 30.7 10.2
 -4 -1 -4 28.6 30.3
 -4 -1 -4 27.2 13.1
 -3 1 -5 723.43 100.79
 -3 1 -5 657.33 99.49
 3 1 5 785.72 95.49
 3 -1 5 763.72 94.69
 -3 -1 -5 688.43 100.59
 -3 -1 -5 640.94 105.69
 -3 -1 -5 710.63 93.89
 2 1 6 2147.69 282.67
 2 1 6 2276.07 287.07
 -2 1 -6 2211.28 290.17
 -2 -1 -6 2189.28 290.27
 -2 -1 -6 2133.59 281.77
 2 -1 6 2163.68 282.07
 2 -1 6 2310.47 286.87
 -1 1 -7 2379.66 304.67
 1 1 7 2479.25 312.07
 1 1 7 2256.97 303.97
 1 -1 7 2536.05 303.57
 1 -1 7 2079.79 310.97
 -1 -1 -7 2352.36 303.37
 -1 -1 -7 2437.66 305.57
 -1 -1 -7 2455.25 316.47
 0 1 -8 271.47 46.2
 0 1 -8 443.46 74.39
 0 1 8 290.97 43.5
 0 -1 -8 266.97 49.3
 0 -1 -8 281.07 36.9
 0 -1 8 366.96 71.39
 0 -1 8 274.17 43
 -1 1 9 15.6 29.2
 1 1 -9 -21.3 23.1
 1 1 -9 -42.7 21.6
 -1 1 9 12.5 19.1
 -1 -1 9 37.8 30.5
 1 -1 -9 5.8 31.3
 -1 -1 9 -5.8 20.5
 2 1 -10 149.29 41.4
 -2 1 10 114.59 42.5
 -2 1 10 156.78 35.8
 -2 1 10 122.79 37.6
 -2 -1 10 129.59 32.8
 -2 -1 10 168.58 50.29
 2 -1 -10 189.98 44.2
 2 -1 -10 172.98 21.5
 -2 -1 10 159.88 42
 3 1 -11 220.58 35
 -3 1 11 225.98 54.29
 3 1 -11 166.98 60.19
 -3 1 11 288.77 70.29
 3 -1 -11 241.78 33.7
 -3 -1 11 231.08 60.09
 3 -1 -11 282.67 65.79
 -3 -1 11 432.86 64.49
 4 1 -12 462.35 96.09
 -4 1 12 352.06 59.39
 4 1 -12 302.17 48.3
 -4 1 12 317.67 72.39
 -4 1 12 277.07 71.29
 -4 -1 12 448.26 78.09
 -4 -1 12 477.75 108.39
 4 -1 -12 326.97 46.7
 4 -1 -12 329.57 88.49
 -5 1 13 581.64 77.39
 5 1 -13 355.06 101.59
 -5 1 13 280.47 82.79
 5 1 -13 443.16 62.59
 -5 1 13 380.66 85.39
 -5 -1 13 421.96 73.19
 5 -1 -13 449.16 106.49
 -5 -1 13 391.76 87.89
 -5 -1 13 427.96 107.89
 5 -1 -13 453.05 61.19
 -6 1 14 8.7 23.6
 -6 1 14 11.1 42.7
 6 1 -14 -76.19 44.9
 -6 1 14 -2.7 36
 -6 -1 14 18.6 21.9
 -6 -1 14 34.7 42.1
 -6 -1 14 20.5 38
 6 -1 -14 -1.5 19.8
 6 -1 -14 20.2 51.29
 7 1 -15 74.29 99.39
 -7 1 15 28.5 29.3
 -7 1 15 17.2 63.09
 -7 -1 15 -12.3 45.3
 -7 -1 15 30.7 27.9
 7 -1 -15 -30.6 13.5
 7 -1 -15 -94.99 79.99
 -8 2 0 28.7 18.1
 8 -2 0 -18.5 20.1
 -8 -2 0 -3.4 14.5
 -7 2 -1 187.78 43
 -7 2 -1 170.78 51.39
 7 2 1 199.78 49.9
 7 2 1 181.08 37.4
 7 -2 1 180.68 36.1
 -7 -2 -1 183.78 54.09
 7 -2 1 181.68 46.2
 -7 -2 -1 194.08 44.4
 -6 2 -2 59.29 29.8
 -6 2 -2 47.3 17.2
 6 2 2 53.29 17.5
 6 2 2 47.2 23
 -6 -2 -2 45.4 18.5
 6 -2 2 65.49 30.6
 6 -2 2 47.4 16
 -6 -2 -2 87.89 39.4
 -5 2 -3 263.67 43.9
 5 2 3 423.06 57.29
 -5 2 -3 178.08 50.99
 5 2 3 264.07 41.6
 -5 -2 -3 203.38 37.3
 5 -2 3 240.28 38.6
 5 -2 3 277.37 57.49
 -5 -2 -3 343.47 70.99
 -5 -2 -3 222.98 43.7
 4 2 4 269.37 37.8
 -4 2 -4 240.78 40.4
 -4 2 -4 155.68 43.4
 4 2 4 228.68 56.69
 -4 -2 -4 255.17 64.49
 -4 -2 -4 234.28 33.6
 4 -2 4 254.37 58.39
 -4 -2 -4 255.07 41.1
 4 -2 4 210.58 34.4
 -3 2 -5 843.62 118.19
 -3 2 -5 979.5 122.69
 3 2 5 910.31 116.79
 -3 -2 -5 885.31 115.29
 -3 -2 -5 848.52 121.79
 3 -2 5 949.01 115.69
 -3 -2 -5 709.73 127.29
 1 2 7 58.19 20.8
 1 -2 7 42.3 9
 -1 -2 -7 136.19 42.3
 -1 -2 -7 56.89 11.1
 0 2 -8 433.56 115.19
 0 -2 8 712.33 114.49
 0 -2 -8 739.63 91.39
 0 -2 8 736.83 90.59
 0 -2 -8 635.04 96.89
 0 -2 -8 841.32 115.79
 -1 2 9 861.01 124.89
 1 2 -9 928.71 130.49
 1 2 -9 803.42 133.89
 -1 2 9 1131.69 142.69
 1 -2 -9 930.61 143.19
 1 -2 -9 882.21 126.09
 -1 -2 9 816.72 124.79
 -1 -2 9 900.31 144.99
 -2 2 10 10.6 16.1
 -2 2 10 5.5 24.1
 2 2 -10 4.5 23.7
 -2 2 10 -8.1 17.6
 2 -2 -10 -7.3 18.3
 2 -2 -10 10.6 2.9
 -2 -2 10 9.6 8
 -2 -2 10 27.8 28.3
 -2 -2 10 3.5 20.3
 -3 2 11 1169.78 199.28
 -3 2 11 1236.48 178.28
 3 2 -11 1127.19 189.38
 -3 -2 11 1349.36 184.48
 -3 -2 11 1243.88 198.98
 3 -2 -11 1275.77 165.28
 3 -2 -11 1479.35 172.68
 3 -2 -11 1095.39 182.78
 -4 2 12 25.6 41.9
 4 2 -12 -23.8 41.7
 -4 2 12 25.5 37.3
 -4 2 12 -11.6 13.9
 4 -2 -12 -7.6 10.3
 4 -2 -12 4.7 78.49
 4 -2 -12 -2.6 5
 -4 -2 12 34.1 47.7
 -4 -2 12 -20.2 31.8
 5 2 -13 -70.39 43.7
 -5 2 13 10.2 30.8
 -5 2 13 33.4 22.1
 -5 2 13 -18.6 27.2
 -5 -2 13 51.39 45.4
 -5 -2 13 -15.2 13.4
 5 -2 -13 -3.7 6.8
 -5 -2 13 42 40.7
 5 -2 -13 12.4 47.1
 -6 2 14 -3.8 37.3
 -6 2 14 31.3 48.3
 6 2 -14 13.1 56.49
 -6 2 14 3.2 22.8
 6 -2 -14 40.9 16.6
 -6 -2 14 34.5 41.6
 6 -2 -14 15.8 58.39
 -6 -2 14 56.49 28.7
 -6 -2 14 47.4 44.1
 -7 2 15 129.19 59.89
 -7 2 15 334.77 71.59
 -7 -2 15 239.88 62.59
 7 -2 -15 216.48 41.4
 7 3 1 62.79 22.3
 7 3 1 99.89 31.5
 -7 3 -1 101.49 35.3
 -7 3 -1 72.39 21.9
 -7 -3 -1 58.29 22.7
 7 -3 1 120.29 38.7
 7 -3 1 88.79 20.3
 -7 -3 -1 87.09 45.5
 -6 3 -2 327.57 66.09
 -6 3 -2 387.46 59.89
 6 3 2 374.26 74.69
 6 3 2 402.26 57.69
 6 -3 2 321.77 68.59
 6 -3 2 334.47 52.29
 -6 -3 -2 295.47 75.89
 -6 -3 -2 327.07 50.19
 -6 -3 -2 397.76 62.69
 -5 3 -3 72.89 26.2
 5 3 3 68.39 18
 -5 3 -3 34.3 14.5
 5 3 3 92.69 27.1
 -5 -3 -3 35.9 42.2
 -5 -3 -3 33 16.6
 5 -3 3 64.09 14.3
 -5 -3 -3 46.4 12
 4 3 4 191.68 42.3
 -4 3 -4 142.89 31.9
 4 3 4 135.39 30.2
 -4 3 -4 169.38 37.3
 -4 -3 -4 162.18 52.59
 4 -3 4 155.88 26.2
 -4 -3 -4 176.18 33.3
 -4 -3 -4 155.28 25.7
 4 -3 4 361.86 60.29
 3 3 5 84.59 17
 -3 3 -5 81.39 18.3
 -3 3 -5 82.49 20.8
 -3 -3 -5 68.19 19.8
 -3 -3 -5 59.59 31.5
 3 -3 5 84.99 14.2
 -3 -3 -5 81.69 14.7
 2 3 6 1829.52 250.27
 -2 3 -6 2025.7 254.97
 2 -3 6 1989.2 249.78
 2 -3 6 1840.72 245.28
 -2 -3 -6 1913.31 245.88
 -2 -3 -6 1914.31 254.47
 1 3 7 632.24 87.19
 -1 3 -7 435.16 95.69
 1 3 7 717.33 89.49
 -1 -3 -7 671.93 95.49
 1 -3 7 609.44 90.69
 -1 -3 -7 552.24 79.39
 0 3 -8 989.5 184.18
 0 3 8 1100.59 178.68
 0 3 8 1485.65 176.58
 0 3 -8 1607.14 176.18
 0 -3 -8 1399.56 173.18
 0 -3 8 1049.89 182.78
 0 -3 -8 1095.99 183.98
 -1 3 9 1.7 18.3
 1 3 -9 20.8 29.5
 -1 3 9 53.59 24.1
 -1 3 9 -2 26.2
 1 3 -9 34 23.2
 1 -3 -9 -34.3 21.6
 1 -3 -9 -24.8 33.5
 -1 -3 9 -49.6 20
 -2 3 10 70.69 29.1
 -2 3 10 88.59 24.6
 -2 3 10 122.69 36.8
 2 3 -10 95.89 38.5
 2 -3 -10 90.69 25.5
 -2 -3 10 90.39 12.9
 -2 -3 10 52.19 35.4
 -2 -3 10 78.59 19.6
 -2 -3 10 85.19 29.6
 2 -3 -10 162.68 37.4
 -3 3 11 -9.7 25.5
 -3 3 11 20.7 23.8
 -3 3 11 17.2 36.3
 3 3 -11 50.59 43.7
 3 -3 -11 25.4 6.5
 -3 -3 11 44.1 7.9
 -3 -3 11 37.6 33.4
 3 -3 -11 16.4 13.2
 3 -3 -11 21 30.4
 -3 -3 11 27.8 37
 -3 -3 11 25.3 16.6
 -4 3 12 1140.09 179.98
 -4 3 12 1203.88 196.08
 4 3 -12 1082.99 210.78
 4 -3 -12 1306.87 165.08
 -4 -3 12 1206.08 183.88
 -4 -3 12 1008.4 244.38
 4 -3 -12 1227.98 157.08
 4 -3 -12 1094.69 184.58
 5 3 -13 64.29 61.89
 -5 3 13 63.89 39.2
 -5 3 13 42.6 25.8
 -5 3 13 129.69 61.09
 5 -3 -13 8.6 13.6
 -5 -3 13 43.1 44.2
 5 -3 -13 50.49 49.2
 -5 -3 13 42.3 23.5
 5 -3 -13 23.2 9.4
 -5 -3 13 92.59 43.8
 -6 3 14 707.93 111.89
 -6 3 14 554.84 132.49
 6 3 -14 627.44 144.19
 -6 3 14 625.94 99.99
 -6 -3 14 320.97 104.69
 6 -3 -14 695.33 138.19
 -6 -3 14 799.62 123.29
 6 -3 -14 563.44 81.19
 -6 -3 14 589.44 97.99
 -7 3 15 6.7 54.09
 -7 3 15 48.4 33.9
 7 -3 -15 10 12.8
 -7 -3 15 -2.1 28.3
 -7 4 -1 2.3 12.7
 -7 4 -1 36 33.9
 7 4 1 17.7 19
 -7 -4 -1 13.4 14.6
 7 -4 1 9.6 10.6
 -7 -4 -1 -30.5 33.2
 7 -4 1 -32.2 20.4
 6 4 2 294.37 51.09
 -6 4 -2 345.37 53.79
 6 4 2 300.67 55.89
 -6 4 -2 315.97 59.09
 6 -4 2 265.57 64.39
 -6 -4 -2 265.47 44.3
 6 -4 2 224.78 75.69
 -6 -4 -2 290.47 89.69
 -6 -4 -2 331.77 55.79
 6 -4 2 350.36 47.3
 5 4 3 309.37 51.59
 -5 4 -3 368.76 54.29
 -5 4 -3 299.57 56.29
 5 4 3 276.47 57.39
 5 -4 3 353.36 48.1
 -5 -4 -3 329.97 46.9
 -5 -4 -3 327.47 55.79
 5 -4 3 357.86 67.39
 -5 -4 -3 340.07 77.69
 5 -4 3 282.57 78.09
 -4 4 -4 1313.07 164.78
 4 4 4 1154.98 163.28
 4 4 4 1285.87 171.18
 -4 4 -4 1186.08 166.38
 4 -4 4 1081.89 172.68
 4 -4 4 1152.88 175.68
 -4 -4 -4 1129.99 183.98
 -4 -4 -4 1323.47 161.58
 4 -4 4 1285.17 161.28
 -4 -4 -4 1292.87 168.68
 -3 4 -5 532.85 75.99
 -3 4 -5 516.15 67.59
 -3 -4 -5 548.95 75.89
 3 -4 5 515.15 67.59
 -3 -4 -5 486.95 67.99
 3 -4 5 404.16 83.09
 2 4 6 3.5 13.4
 -2 4 -6 -2.2 13.7
 2 4 6 -1.8 5.6
 -2 -4 -6 17.9 6.9
 2 -4 6 6.3 6.4
 -1 4 -7 105.59 40.8
 1 4 7 169.48 37.5
 1 -4 7 272.87 49.8
 -1 -4 -7 220.58 31.7
 -1 -4 -7 427.66 58.49
 0 4 8 2416.06 285.97
 0 4 -8 1996.6 288.17
 0 4 8 2063.19 282.17
 0 -4 -8 2336.37 277.87
 0 -4 -8 1734.93 286.97
 0 -4 8 2106.39 276.87
 -1 4 9 664.93 110.99
 1 4 -9 369.46 96.89
 1 -4 -9 696.33 89.19
 -1 -4 9 502.25 115.19
 1 -4 -9 565.04 112.69
 1 -4 -9 668.13 92.59
 -1 -4 9 557.84 94.29
 2 4 -10 483.55 88.19
 -2 4 10 369.56 84.19
 -2 4 10 518.55 75.49
 -2 4 10 330.77 81.49
 2 -4 -10 592.24 76.19
 -2 -4 10 625.94 103.59
 -2 -4 10 539.65 65.39
 2 -4 -10 501.65 88.89
 -2 -4 10 464.65 81.19
 2 -4 -10 487.15 79.89
 -3 4 11 281.07 71.69
 -3 4 11 293.27 77.49
 -3 4 11 296.47 57.59
 3 4 -11 279.57 74.99
 3 -4 -11 261.87 67.89
 -3 -4 11 336.27 73.89
 -3 -4 11 306.57 39.2
 3 -4 -11 253.57 38.8
 -3 -4 11 260.17 68.49
 3 -4 -11 311.77 53.19
 -3 -4 11 302.57 45.7
 -4 4 12 65.49 28.8
 -4 4 12 21.6 16.5
 4 4 -12 13.6 63.19
 -4 4 12 6 34.9
 -4 -4 12 20 6.2
 -4 -4 12 32.6 39
 4 -4 -12 19.9 7.3
 4 -4 -12 23.5 35.8
 4 -4 -12 10.4 15.1
 -5 4 13 22.8 43.5
 -5 4 13 23.3 22.4
 -5 4 13 24.8 33.7
 5 4 -13 35.6 54.89
 5 -4 -13 40 18.6
 5 -4 -13 115.29 59.29
 5 -4 -13 35.9 10.9
 -5 -4 13 30.2 40.9
 -5 -4 13 14.6 39.5
 -5 -4 13 36.9 21.1
 -6 4 14 186.38 57.09
 6 4 -14 105.59 74.39
 -6 4 14 63.69 51.39
 -6 4 14 135.59 40.1
 6 -4 -14 128.49 34.7
 -6 -4 14 145.19 43.1
 6 -4 -14 118.39 25.4
 -6 -4 14 99.99 61.79
 -6 -4 14 228.38 72.59
 6 -4 -14 119.69 67.89
 -7 4 15 57.09 60.09
 7 -4 -15 7.8 13.5
 -7 5 -1 383.96 104.49
 -7 5 -1 399.46 68.89
 7 5 1 453.75 71.49
 7 5 1 390.56 67.59
 -7 -5 -1 395.46 65.29
 -7 -5 -1 496.35 76.19
 -7 -5 -1 391.06 103.19
 7 -5 1 328.27 79.89
 7 -5 1 374.66 61.89
 6 5 2 4.3 14.5
 -6 5 -2 22.2 22.3
 6 5 2 15 18.3
 -6 5 -2 21.9 15.1
 6 -5 2 31.3 23.7
 -6 -5 -2 20.4 13.4
 -6 -5 -2 10 8
 -6 -5 -2 40.8 41.4
 6 -5 2 38.3 45
 6 -5 2 11.2 9
 5 5 3 11.2 16.8
 -5 5 -3 12.8 11.2
 -5 5 -3 -16.7 16.5
 5 -5 3 11.4 7.8
 -5 -5 -3 -19.3 40.2
 5 -5 3 15.7 20.1
 -5 -5 -3 15.5 12.6
 5 -5 3 64.59 38.9
 -5 -5 -3 3.4 6.9
 4 5 4 8.9 19.5
 -4 5 -4 11.8 9.9
 -4 -5 -4 8.4 7.8
 4 -5 4 8 23.6
 4 -5 4 37.4 28.3
 -4 -5 -4 -1.8 7
 -4 -5 -4 17.9 41
 4 -5 4 0 5.6
 -3 5 -5 423.26 56.59
 -3 5 -5 354.86 45.4
 3 5 5 413.36 59.39
 3 -5 5 214.88 59.89
 -3 -5 -5 345.37 47
 3 -5 5 235.98 51.89
 -3 -5 -5 318.77 53.79
 3 -5 5 318.07 45.5
 2 5 6 25.4 16.8
 2 5 6 16.5 8.6
 -2 5 -6 20.2 19.1
 -2 -5 -6 10 11.5
 -2 -5 -6 20.4 8.3
 2 -5 6 20.4 7.9
 1 5 7 2691.03 322.77
 1 5 7 2190.78 318.47
 1 -5 7 2436.36 312.57
 1 -5 7 2612.64 321.87
 -1 -5 -7 2259.27 323.37
 0 5 8 249.68 53.39
 0 5 -8 166.18 42.5
 1 5 -9 163.88 47.5
 -1 5 9 142.29 42.9
 -1 5 9 288.67 59.09
 -1 -5 9 510.95 86.39
 1 -5 -9 140.89 48.9
 1 -5 -9 230.38 45.5
 -1 -5 9 327.87 53.79
 -2 5 10 -3.2 14.9
 -2 5 10 -2.4 20.1
 -2 5 10 36.3 27.2
 2 5 -10 13.7 31.8
 -2 -5 10 18.9 23.9
 2 -5 -10 4.3 18.5
 2 -5 -10 4.9 10.4
 2 -5 -10 19.1 21.4
 -2 -5 10 -3.4 4.1
 -2 -5 10 16.4 25
 -3 5 11 202.78 57.09
 3 5 -11 106.39 64.69
 -3 5 11 220.68 53.69
 -3 5 11 141.49 53.99
 -3 -5 11 274.47 68.29
 -3 -5 11 283.77 34
 3 -5 -11 222.58 58.89
 3 -5 -11 272.57 50.89
 -3 -5 11 275.17 64.39
 4 5 -12 14.5 45
 -4 5 12 2.5 35.9
 -4 5 12 25.2 16.5
 -4 5 12 18.6 25.4
 -4 -5 12 -1 37.5
 4 -5 -12 16.4 6.5
 -4 -5 12 11.8 6.2
 4 -5 -12 29.2 36.1
 4 -5 -12 9.1 16.3
 -4 -5 12 0.8 36.4
 -5 5 13 1449.76 200.78
 -5 5 13 1324.37 195.18
 5 5 -13 1069.49 218.58
 -5 5 13 1479.05 228.68
 5 -5 -13 1320.17 214.18
 -5 -5 13 1470.25 193.88
 5 -5 -13 1494.25 193.28
 5 -5 -13 1319.27 182.78
 -5 -5 13 1631.84 217.58
 -5 -5 13 1614.34 233.88
 -6 5 14 -6.2 32.1
 -6 5 14 102.19 58.39
 6 5 -14 32.5 67.09
 -6 5 14 29.9 27.1
 -6 -5 14 17.7 26.9
 6 -5 -14 16.9 10.4
 6 -5 -14 5.6 16.9
 -6 -5 14 -9.7 47.7
 -6 -5 14 38.1 50.49
 6 -5 -14 62.19 57.49
 7 6 1 5 16.4
 -7 6 -1 16.7 30.5
 -7 6 -1 11.1 12.6
 7 6 1 5.9 17.2
 -7 -6 -1 0.3 8.8
 -7 -6 -1 14 49.4
 7 -6 1 14.2 11.3
 -6 6 -2 289.27 50.19
 -6 6 -2 271.67 52.79
 6 6 2 246.48 52.69
 6 6 2 285.97 54.79
 6 -6 2 239.18 68.89
 6 -6 2 402.06 67.39
 -6 -6 -2 328.97 54.99
 6 -6 2 255.27 42.5
 -6 -6 -2 248.68 41.5
 -6 -6 -2 376.26 92.09
 5 6 3 513.35 75.79
 5 6 3 409.46 72.19
 -5 6 -3 516.25 70.89
 -5 6 -3 529.35 71.79
 -5 -6 -3 448.86 64.49
 5 -6 3 307.17 87.59
 5 -6 3 464.65 82.69
 5 -6 3 422.56 63.89
 -5 -6 -3 538.35 74.69
 -5 -6 -3 342.87 93.49
 -4 6 -4 915.91 116.69
 4 6 4 876.61 120.39
 4 6 4 905.61 119.49
 4 -6 4 856.11 109.89
 -4 -6 -4 655.13 140.89
 -4 -6 -4 774.72 116.89
 4 -6 4 665.43 124.99
 4 -6 4 749.73 122.99
 -4 -6 -4 862.31 110.79
 -3 6 -5 355.16 58.49
 3 6 5 439.96 63.39
 -3 -6 -5 357.56 57.69
 3 -6 5 309.17 56.59
 -3 -6 -5 344.77 50.49
 3 -6 5 339.77 71.49
 2 6 6 170.08 35.5
 -2 6 -6 139.89 32.1
 2 6 6 145.79 26.4
 -2 -6 -6 124.89 22.6
 -2 -6 -6 91.19 28.4
 2 -6 6 119.99 23.1
 1 6 7 29.5 10.9
 -1 6 -7 47.5 24.1
 1 -6 7 37.3 15.8
 -1 -6 -7 35.7 21.7
 1 -6 7 48.1 19.2
 0 6 8 1184.98 138.49
 0 6 8 825.02 140.29
 0 6 -8 775.72 138.09
 0 -6 8 998 135.99
 0 -6 -8 1090.89 136.29
 0 -6 -8 831.32 142.09
 0 -6 8 1017.2 148.79
 -1 6 9 505.35 91.99
 1 6 -9 411.16 88.39
 -1 6 9 637.64 97.29
 1 -6 -9 658.73 85.79
 -1 -6 9 522.35 103.49
 1 -6 -9 530.65 101.49
 -1 -6 9 525.55 89.09
 1 -6 -9 602.84 84.09
 2 6 -10 426.86 102.29
 -2 6 10 382.86 96.49
 -2 6 10 465.25 104.69
 -2 6 10 544.45 84.69
 2 -6 -10 715.03 89.69
 2 -6 -10 584.44 102.29
 -2 -6 10 591.34 97.49
 2 -6 -10 590.44 91.39
 -2 -6 10 559.64 75.29
 -2 -6 10 957.6 122.29
 -3 6 11 100.09 41.1
 -3 6 11 117.39 47.7
 3 6 -11 202.48 66.79
 -3 6 11 202.48 41.6
 -3 6 11 191.48 43
 3 -6 -11 173.18 49.3
 -3 -6 11 239.98 59.69
 3 -6 -11 307.07 51.89
 -3 -6 11 72.89 40.7
 -3 -6 11 152.18 25.1
 -4 6 12 59.79 22.8
 -4 6 12 99.49 36.7
 -4 6 12 53.79 41.3
 4 6 -12 26.6 52.89
 4 -6 -12 72.69 40.3
 -4 -6 12 90.39 51.39
 4 -6 -12 80.59 14.7
 -4 -6 12 115.79 48.3
 -4 -6 12 103.69 15.9
 4 -6 -12 48.4 25.6
 -5 6 13 4.2 31.5
 5 6 -13 21.1 58.19
 -5 6 13 -4.9 35.9
 -5 6 13 13.8 21
 5 -6 -13 30.4 8.3
 5 -6 -13 -1.1 37.5
 -5 -6 13 -3.5 16.2
 -5 -6 13 4.4 6.4
 -5 -6 13 57.89 48.5
 -5 -6 13 23.6 46.5
 5 -6 -13 18.6 19.7
 -6 6 14 99.09 45
 -6 6 14 171.18 65.09
 -6 6 14 127.59 58.99
 6 6 -14 82.39 80.89
 -6 -6 14 108.49 35.1
 6 -6 -14 81.49 65.59
 6 -6 -14 80.59 20.6
 6 -6 -14 189.78 39.9
 -6 -6 14 266.47 119.99
 7 7 1 23.6 20.2
 -7 7 -1 34.4 18.9
 7 7 1 48 20.6
 -7 7 -1 35.5 28.8
 -7 -7 -1 51.39 22.8
 -7 -7 -1 48.5 13.8
 7 -7 1 28.3 31.8
 7 -7 1 -56.09 86.79
 7 -7 1 39 13.1
 -7 -7 -1 95.89 59.99
 6 7 2 253.17 48.6
 -6 7 -2 166.58 42
 -6 7 -2 192.58 39.8
 6 7 2 146.29 42.3
 -6 -7 -2 200.68 70.79
 6 -7 2 187.88 49.6
 6 -7 2 180.38 31.8
 -6 -7 -2 199.28 31.8
 -6 -7 -2 204.48 42.5
 6 -7 2 123.19 55.79
 5 7 3 49.1 20.5
 -5 7 -3 33.6 13.4
 -5 7 -3 46.9 18
 5 7 3 13.2 17.6
 -5 -7 -3 32.1 13.9
 5 -7 3 50.69 33.8
 5 -7 3 35.1 35.4
 -5 -7 -3 -20.6 44.8
 5 -7 3 12.5 8.7
 -5 -7 -3 4.8 7.7
 4 7 4 119.19 30.9
 -4 7 -4 121.59 27.6
 4 7 4 176.38 42.5
 -4 7 -4 196.48 31.4
 4 -7 4 78.99 36.1
 -4 -7 -4 119.49 65.29
 -4 -7 -4 70.99 19.1
 4 -7 4 117.69 20.9
 -4 -7 -4 142.49 30.3
 4 -7 4 145.89 42.2
 -3 7 -5 91.59 24
 3 7 5 114.89 34
 -3 -7 -5 69.39 17.5
 -3 -7 -5 115.09 27.7
 3 -7 5 76.39 24.8
 -2 7 -6 1271.87 208.78
 2 7 6 1644.14 214.18
 2 7 6 1664.03 207.98
 -2 -7 -6 1417.86 203.58
 2 -7 6 1634.54 201.78
 2 -7 6 1725.83 204.98
 -2 -7 -6 1539.85 211.98
 -1 7 -7 312.97 70.89
 1 7 7 400.06 70.89
 1 7 7 449.46 61.59
 1 -7 7 416.46 66.69
 1 -7 7 427.26 62.69
 -1 -7 -7 402.76 72.09
 0 7 8 1238.18 190.08
 0 7 8 1416.06 184.68
 0 -7 -8 1157.78 189.08
 0 -7 8 1315.27 185.38
 0 -7 -8 1493.95 185.38
 0 -7 8 1305.17 190.08
 0 -7 -8 1474.25 182.08
 -1 7 9 44 24.7
 -1 7 9 27.5 20
 -1 -7 9 15.3 22
 1 -7 -9 21.5 15.6
 1 -7 -9 23.1 25
 -1 -7 9 20.2 26
 1 -7 -9 40.5 18.8
 -2 7 10 49.8 36
 -2 7 10 -23.9 18.3
 -2 7 10 17.9 27
 2 7 -10 1.7 37.2
 2 -7 -10 48.6 30
 2 -7 -10 45.9 26.3
 -2 -7 10 10.1 27.1
 -2 -7 10 20.7 35.1
 -3 7 11 23 16.3
 -3 7 11 -23.7 20.9
 3 7 -11 41.7 51.69
 -3 7 11 -48.5 28.3
 -3 7 11 10.8 45.8
 -3 -7 11 14.6 34.3
 -3 -7 11 10.2 7.3
 3 -7 -11 -32.5 32.2
 3 -7 -11 39 24.8
 -3 -7 11 21.8 42.7
 -4 7 12 694.13 166.28
 4 7 -12 707.53 169.98
 -4 7 12 1052.39 148.59
 -4 7 12 968.2 145.09
 4 -7 -12 1039.2 134.29
 4 -7 -12 905.01 157.58
 4 -7 -12 1098.29 151.58
 -4 -7 12 1069.29 183.08
 -4 -7 12 1179.58 135.19
 -4 -7 12 1166.98 170.98
 -5 7 13 7.2 28.8
 -5 7 13 -16.1 15.4
 -5 7 13 -35.8 33.5
 5 7 -13 -2.6 53.79
 -5 -7 13 -12.5 14
 5 -7 -13 -5.9 17.4
 -5 -7 13 5 6.3
 -5 -7 13 -13.6 37.2
 5 -7 -13 14.2 7.1
 -5 -7 13 -14.7 35.5
 5 -7 -13 -2.7 34.9
 -6 7 14 296.97 86.79
 -6 7 14 444.36 102.79
 6 7 -14 230.78 146.29
 -6 7 14 385.96 103.09
 6 -7 -14 477.15 59.79
 -6 -7 14 316.27 101.99
 6 -7 -14 419.06 74.89
 -6 -7 14 385.66 78.19
 -6 -7 14 563.74 115.69
 7 8 1 219.48 52.39
 -7 8 -1 104.29 36
 -7 8 -1 75.29 28
 7 -8 1 158.68 46.5
 -7 -8 -1 169.88 74.79
 -7 -8 -1 78.39 20.8
 -7 -8 -1 92.09 31.2
 7 -8 1 120.19 25.5
 -6 8 -2 64.29 24.2
 6 8 2 59.69 26.2
 6 8 2 69.49 21.9
 -6 8 -2 87.49 24.6
 6 -8 2 91.49 48.3
 -6 -8 -2 53.09 15.4
 -6 -8 -2 42.1 18.1
 6 -8 2 104.39 19.3
 -6 -8 -2 111.59 61.29
 6 -8 2 107.59 37.8
 -5 8 -3 446.36 70.99
 -5 8 -3 506.75 69.19
 5 8 3 476.85 70.69
 5 8 3 422.06 78.39
 5 -8 3 466.05 85.39
 -5 -8 -3 458.75 117.89
 -5 -8 -3 496.25 66.09
 -5 -8 -3 464.55 74.19
 5 -8 3 410.66 88.69
 5 -8 3 438.76 64.19
 -4 8 -4 250.17 44.4
 4 8 4 235.78 50.79
 4 8 4 213.38 42.8
 -4 -8 -4 207.08 74.39
 -4 -8 -4 207.68 40.9
 -4 -8 -4 174.58 33.7
 4 -8 4 232.28 60.39
 -3 8 -5 510.05 74.49
 3 8 5 532.25 79.49
 -3 -8 -5 449.06 71.19
 -3 -8 -5 466.35 64.49
 3 -8 5 425.06 66.89
 3 -8 5 294.27 80.39
 2 8 6 88.79 20.3
 -2 8 -6 65.29 23.2
 2 8 6 71.79 26.3
 2 -8 6 85.59 18.3
 2 -8 6 86.09 17.4
 -2 -8 -6 55.49 16.2
 1 8 7 5 18.7
 1 8 7 10.7 8.2
 -1 8 -7 -2.6 17.3
 1 -8 7 5.4 14.1
 1 -8 7 6.2 16.5
 -1 -8 -7 -3.1 10.4
 -1 -8 -7 -1.1 13
 0 8 8 396.46 57.69
 0 8 8 289.67 66.59
 0 -8 -8 341.37 58.39
 0 -8 8 347.37 62.89
 0 -8 -8 237.58 66.39
 0 -8 -8 388.16 55.39
 0 -8 8 271.97 64.59
 -1 8 9 910.51 147.29
 1 -8 -9 942.51 159.98
 -1 -8 9 979.7 156.88
 1 -8 -9 1253.57 150.38
 1 -8 -9 993.2 144.29
 -1 -8 9 1084.59 154.18
 -2 8 10 111.69 37.1
 -2 8 10 66.59 42.9
 2 -8 -10 86.89 32.9
 -2 -8 10 89.59 48.3
 -2 -8 10 75.29 36.8
 2 -8 -10 49.6 35.1
 2 -8 -10 93.19 35.8
 -3 8 11 613.34 83.29
 -3 8 11 652.83 89.69
 -3 8 11 454.25 107.09
 3 8 -11 406.86 115.19
 -3 -8 11 687.03 120.09
 -3 -8 11 631.54 74.79
 3 -8 -11 578.24 96.89
 -3 -8 11 431.06 75.59
 3 -8 -11 536.15 96.59
 -3 -8 11 699.93 115.99
 -4 8 12 -0.7 18.3
 -4 8 12 24.7 28.5
 -4 8 12 -11.5 25.6
 4 8 -12 110.69 62.29
 -4 -8 12 15.1 8.7
 4 -8 -12 9.1 37.3
 -4 -8 12 14.2 35.7
 -4 -8 12 27 47.8
 4 -8 -12 -6.2 21.6
 5 8 -13 -14.6 59.39
 -5 8 13 -10.6 26.2
 -5 8 13 -44.2 37.6
 -5 8 13 15.4 22.6
 5 -8 -13 16.9 21.5
 -5 -8 13 5.3 5.8
 5 -8 -13 1.8 6.5
 -5 -8 13 8.4 44.5
 -5 -8 13 -2.8 30.4
 5 -8 -13 -12.9 36
 -6 8 14 129.49 65.59
 -6 8 14 53.19 38.3
 -6 8 14 71.09 35.7
 6 -8 -14 100.09 70.59
 -6 -8 14 85.09 18.1
 -6 -8 14 74.89 34.2
 -6 -8 14 30.2 54.69
 6 -8 -14 71.19 17.1
 -6 -8 14 32.1 53.59
 6 -8 -14 70.79 34.3
 -7 9 -1 332.57 65.49
 7 9 1 460.75 81.09
 -7 9 -1 315.37 82.19
 -7 -9 -1 369.06 56.49
 -7 -9 -1 367.96 103.39
 7 -9 1 104.49 115.79
 7 -9 1 371.66 57.09
 7 -9 1 363.46 84.59
 -7 -9 -1 534.75 77.99
 -6 9 -2 158.58 32.2
 6 9 2 62.09 18.8
 -6 9 -2 65.79 23.2
 6 9 2 60.99 28.1
 -6 -9 -2 30.3 13.1
 6 -9 2 73.89 17.4
 6 -9 2 48.9 27.7
 -6 -9 -2 32.1 17.2
 6 -9 2 66.79 45.2
 -6 -9 -2 23.9 56.49
 -5 9 -3 101.59 26.3
 5 9 3 178.98 47.6
 5 9 3 98.79 23.2
 -5 -9 -3 176.18 75.09
 5 -9 3 83.09 18.3
 5 -9 3 67.39 39.7
 -5 -9 -3 94.49 20.6
 -5 -9 -3 67.29 23
 5 -9 3 62.99 32.2
 4 9 4 11.7 20.3
 -4 9 -4 -1 14.1
 4 9 4 16.9 13.3
 4 -9 4 -26.6 21.8
 -4 -9 -4 6.3 47.9
 -4 -9 -4 1.2 9.7
 4 -9 4 -4.5 25.9
 -4 -9 -4 23.1 11.7
 -3 9 -5 469.55 84.19
 3 9 5 500.65 90.49
 3 -9 5 623.24 77.09
 -3 -9 -5 498.75 80.49
 3 -9 5 470.15 89.89
 -3 -9 -5 531.15 74.59
 2 9 6 378.66 78.79
 -2 9 -6 344.17 71.49
 2 -9 6 462.15 57.59
 2 -9 6 417.96 57.79
 -2 -9 -6 354.26 69.79
 1 9 7 2238.78 271.77
 -1 9 -7 2147.89 274.07
 1 9 7 1958.3 282.07
 1 -9 7 1619.24 282.77
 1 -9 7 2021 274.87
 -1 -9 -7 2328.17 280.97
 0 9 8 132.09 44.8
 0 9 8 241.68 38.7
 0 -9 8 221.68 55.19
 0 -9 -8 224.38 50.99
 0 -9 -8 192.18 40.3
 0 -9 -8 228.98 45.6
 0 -9 8 143.39 39.5
 -1 9 9 49.3 40.2
 -1 9 9 68.29 23.1
 1 -9 -9 81.39 31.2
 1 -9 -9 85.89 29.7
 -1 -9 9 8.1 39.7
 -1 -9 9 83.99 36.6
 1 -9 -9 26.1 35.6
 -2 9 10 37.3 33.6
 -2 9 10 37.3 42.2
 2 -9 -10 49.9 31.7
 -2 -9 10 74.29 41.5
 -2 -9 10 103.39 51.19
 2 -9 -10 67.49 28.3
 2 -9 -10 33.2 29.3
 -2 -9 10 17.3 37.5
 -3 9 11 99.49 43.8
 -3 9 11 96.09 59.09
 -3 9 11 112.49 31.1
 -3 9 11 138.49 46.5
 -3 -9 11 113.99 33.2
 -3 -9 11 171.78 25.4
 -3 -9 11 149.29 58.09
 3 -9 -11 116.99 45.5
 -3 -9 11 156.58 61.49
 -4 9 12 77.09 43.3
 -4 9 12 170.08 40.2
 -4 9 12 145.79 42.1
 -4 -9 12 172.68 68.79
 -4 -9 12 141.39 26.1
 4 -9 -12 318.47 64.99
 -4 -9 12 40.2 52.19
 4 -9 -12 131.89 53.69
 -5 9 13 445.16 78.99
 -5 9 13 322.37 85.29
 -5 9 13 390.56 74.69
 -5 -9 13 243.68 88.89
 -5 -9 13 456.75 57.39
 -5 -9 13 397.26 69.29
 -5 -9 13 446.06 110.99
 5 -9 -13 357.96 89.99
 5 -9 -13 477.95 99.19
 5 -9 -13 398.26 55.99
 -6 9 14 92.69 38.5
 -6 9 14 137.69 63.99
 -6 9 14 137.79 45.7
 6 -9 -14 94.99 19.3
 6 -9 -14 69.29 63.39
 -6 -9 14 91.59 19.4
 -6 -9 14 139.89 67.89
 -6 -9 14 72.89 56.29
 6 -9 -14 58.39 30.5
 -6 -9 14 56.19 32
 7 10 1 5.4 22.3
 -7 10 -1 5.5 18.2
 7 -10 1 -52.09 91.99
 -7 -10 -1 -1.6 14.5
 -7 -10 -1 -33.5 58.79
 -7 -10 -1 -1.9 8.2
 7 -10 1 -13.4 25.8
 7 -10 1 0.6 8.4
 7 -10 1 22.8 48.4
 6 10 2 357.76 82.79
 -6 10 -2 440.66 69.59
 -6 -10 -2 446.56 62.99
 -6 -10 -2 525.25 77.49
 6 -10 2 332.47 94.79
 6 -10 2 339.57 81.19
 6 -10 2 460.15 62.09
 -6 -10 -2 411.16 114.49
 -5 10 -3 18.6 17.1
 5 10 3 19.7 23.9
 5 10 3 27.9 15.2
 -5 -10 -3 10.9 11.6
 5 -10 3 25.5 26.6
 5 -10 3 15.6 8.4
 5 -10 3 9.6 32
 -5 -10 -3 6.6 10.1
 -5 -10 -3 29.4 55.89
 4 10 4 736.93 96.79
 4 10 4 670.63 112.69
 -4 10 -4 579.94 101.09
 -4 -10 -4 708.83 95.99
 4 -10 4 775.72 105.49
 4 -10 4 644.24 111.59
 -4 -10 -4 754.42 104.39
 -4 -10 -4 590.74 144.39
 3 10 5 2.7 24.6
 -3 -10 -5 2.9 11.9
 3 -10 5 -3.6 25.6
 -3 -10 -5 56.99 17.9
 3 -10 5 -19.3 18.3
 2 10 6 103.99 39.2
 -2 10 -6 115.49 31.5
 -2 -10 -6 100.89 30.8
 2 -10 6 149.39 28.5
 2 -10 6 103.59 38.7
 2 -10 6 169.48 22.8
 1 10 7 41.1 32.2
 1 10 7 9.4 8.4
 1 -10 7 -16.7 13.3
 -1 -10 -7 8.2 16.5
 -1 -10 -7 28.3 22.5
 0 10 8 758.42 100.49
 0 10 8 531.75 119.19
 0 -10 -8 799.12 105.39
 0 -10 8 655.13 111.99
 0 -10 8 700.53 116.59
 0 -10 -8 477.95 112.09
 0 -10 -8 858.41 109.49
 -1 10 9 -6.7 14.1
 -1 10 9 -7.7 35
 1 -10 -9 -1 19.8
 -1 -10 9 -17.6 28.9
 1 -10 -9 -12.9 30.5
 -1 -10 9 84.49 41.9
 1 -10 -9 24.5 23
 -2 10 10 1091.79 163.78
 -2 10 10 1148.29 148.19
 2 -10 -10 1193.58 163.98
 -2 -10 10 802.02 161.68
 -2 -10 10 1126.09 174.98
 2 -10 -10 1028.1 155.28
 2 -10 -10 1067.59 166.18
 -2 -10 10 1322.87 177.68
 -3 10 11 -3.8 50.49
 -3 10 11 31.9 32.1
 -3 -10 11 -3.5 48.1
 3 -10 -11 13.1 26.9
 -3 -10 11 44.8 18.8
 3 -10 -11 31.4 33.8
 -3 -10 11 3 34.3
 -3 -10 11 40.8 12.9
 -4 10 12 196.78 50.19
 -4 10 12 212.48 52.69
 -4 10 12 125.69 38.3
 4 -10 -12 120.79 53.29
 4 -10 -12 131.49 74.99
 -4 -10 12 168.18 73.39
 -4 -10 12 130.29 60.59
 -4 -10 12 156.98 27.1
 -5 10 13 -0.2 28.9
 -5 10 13 -18.4 20.1
 -5 10 13 -10.7 25.7
 5 -10 -13 11.7 26.2
 -5 -10 13 73.79 56.39
 -5 -10 13 -5.3 7.4
 -5 -10 13 -23 39.3
 -5 -10 13 2.7 18
 5 -10 -13 1.8 5.8
 5 -10 -13 44.9 40.6
 -6 10 14 174.38 54.49
 -6 10 14 172.68 50.29
 -6 10 14 415.76 90.69
 6 -10 -14 112.29 63.19
 -6 -10 14 233.18 73.49
 -6 -10 14 188.68 47.8
 -6 -10 14 183.98 30.5
 -6 -10 14 196.18 81.99
 6 -10 -14 131.49 45.3
 6 -10 -14 198.08 30.2
 7 11 1 58.39 33.7
 -7 -11 -1 44.4 66.69
 7 -11 1 124.29 94.99
 7 -11 1 141.29 62.39
 -6 11 -2 144.49 35.4
 6 11 2 124.59 42.9
 -6 -11 -2 164.08 30.5
 -6 -11 -2 107.69 73.09
 -6 -11 -2 167.38 42.8
 6 -11 2 159.98 44.4
 6 -11 2 152.98 27.5
 6 -11 2 142.29 55.39
 5 11 3 -10.9 8.8
 -5 11 -3 -6.9 14.8
 -5 -11 -3 56.09 62.79
 5 -11 3 44.1 33.4
 -5 -11 -3 6.5 9
 -5 -11 -3 17.5 12.9
 5 -11 3 23.2 24.8
 -4 11 -4 13.2 20.9
 4 11 4 -1.1 11.1
 4 11 4 0.2 25
 4 -11 4 21.2 21.6
 4 -11 4 23.2 28.1
 -4 -11 -4 9 11.4
 -4 -11 -4 -15.4 9
 -3 11 -5 98.59 25.2
 3 11 5 124.29 31
 3 11 5 105.69 40.7
 -3 -11 -5 177.18 36.8
 3 -11 5 141.29 41.3
 3 -11 5 157.58 34.7
 -3 -11 -5 127.49 25.9
 -2 11 -6 878.01 146.19
 2 11 6 906.81 163.18
 -2 -11 -6 1395.26 159.18
 2 -11 6 1224.98 142.09
 2 -11 6 1140.39 145.19
 2 -11 6 939.31 158.58
 1 11 7 551.94 78.69
 -1 -11 -7 601.64 90.19
 -1 -11 -7 667.03 97.29
 1 -11 7 456.65 82.09
 0 11 8 274.87 94.69
 0 11 8 548.75 67.39
 0 -11 8 455.35 82.69
 0 -11 -8 439.26 76.59
 0 -11 -8 497.25 74.09
 0 -11 -8 311.77 74.89
 0 -11 8 387.66 89.89
 -1 11 9 50.19 41.3
 -1 11 9 116.59 27.3
 -1 -11 9 34.8 34.5
 1 -11 -9 51.49 41.7
 -1 -11 9 63.49 43.5
 1 -11 -9 100.59 32.8
 1 -11 -9 164.78 39.7
 -2 11 10 55.79 26.9
 -2 11 10 -2.9 43.5
 -2 11 10 72.69 22.4
 2 -11 -10 72.39 37.7
 -2 -11 10 196.48 50.89
 2 -11 -10 125.39 35.9
 2 -11 -10 74.49 37.4
 -2 -11 10 112.89 58.19
 -2 -11 10 26.7 37.5
 -3 11 11 280.07 62.79
 -3 11 11 67.89 97.89
 -3 11 11 221.08 48.3
 -3 -11 11 191.58 37
 3 -11 -11 231.88 57.89
 -3 -11 11 241.98 49
 3 -11 -11 166.98 56.29
 -3 -11 11 249.18 68.59
 -4 11 12 332.37 84.09
 -4 11 12 358.06 74.69
 4 -11 -12 414.66 93.59
 -4 -11 12 534.75 123.49
 -4 -11 12 564.44 122.59
 -4 -11 12 451.05 61.69
 4 -11 -12 483.55 94.39
 -5 11 13 318.17 76.89
 -5 11 13 282.47 67.69
 -5 11 13 286.37 67.59
 -5 -11 13 512.85 115.29
 -5 -11 13 267.27 91.29
 -5 -11 13 261.77 45.8
 5 -11 -13 290.57 78.09
 5 -11 -13 337.27 87.19
 -5 -11 13 411.36 61.29
 -6 11 14 43.3 48.5
 -6 11 14 38.8 32.4
 -6 11 14 88.49 42.9
 6 -11 -14 78.49 55.79
 -6 -11 14 25.2 47.9
 -6 -11 14 150.18 83.09
 -6 -11 14 127.69 38.6
 6 -11 -14 97.79 19.9
 -6 -11 14 122.49 21.9
 -6 12 -2 31.4 20
 6 12 2 12.7 34
 6 -12 2 -10.3 26
 -6 -12 -2 31.5 75.49
 6 -12 2 -106.89 66.49
 6 -12 2 10.7 16.9
 -6 -12 -2 8.6 18.1
 -6 -12 -2 0 9.1
 6 -12 2 1.1 41.2
 -5 12 -3 366.66 65.79
 5 12 3 271.87 80.89
 5 -12 3 396.16 77.89
 5 -12 3 473.35 81.59
 -5 -12 -3 353.86 103.39
 -5 -12 -3 431.96 68.99
 -5 -12 -3 392.26 58.49
 -4 12 -4 -2.9 22
 4 12 4 44.2 12.4
 4 12 4 26.8 30.7
 -4 -12 -4 27.2 13.8
 -4 -12 -4 27.8 17.4
 4 -12 4 36.2 29.6
 4 -12 4 49.3 25.1
 3 12 5 502.85 116.19
 3 -12 5 726.73 97.19
 3 -12 5 690.73 109.79
 -3 -12 -5 742.63 96.59
 -3 -12 -5 677.43 102.49
 2 12 6 -4.5 31.9
 2 -12 6 74.09 29.1
 -2 -12 -6 8.6 16.7
 -2 -12 -6 16.4 19.3
 2 -12 6 -18.1 12.8
 1 12 7 86.89 19.8
 1 12 7 71.99 42.8
 1 -12 7 55.69 18.3
 -1 -12 -7 68.89 26.9
 -1 -12 -7 38.4 25.4
 0 12 8 151.58 63.29
 0 12 8 317.57 45.3
 0 -12 8 311.47 66.79
 0 -12 8 243.48 70.69
 0 -12 -8 370.66 77.19
 0 -12 -8 267.07 60.59
 -1 12 9 861.71 117.69
 -1 12 9 913.71 121.19
 -1 -12 9 807.82 140.29
 1 -12 -9 770.92 144.09
 1 -12 -9 853.51 136.19
 -1 -12 9 745.83 148.19
 1 -12 -9 872.11 126.09
 -2 12 10 22.7 15.6
 -2 12 10 24.9 18.2
 -2 -12 10 -23.4 26.9
 -2 -12 10 -5.8 45.4
 2 -12 -10 4.8 31.1
 2 -12 -10 63.39 29.9
 -2 -12 10 -9.8 26.2
 2 -12 -10 -22.5 24.8
 -3 12 11 856.61 117.49
 -3 12 11 773.42 129.69
 -3 -12 11 699.93 107.79
 -3 -12 11 1007.5 160.68
 3 -12 -11 984.3 140.19
 3 -12 -11 755.42 127.29
 -3 -12 11 1092.29 207.68
 -3 -12 11 674.83 123.09
 -4 12 12 -75.99 27.7
 -4 12 12 11.6 19.4
 4 -12 -12 58.99 42.2
 4 -12 -12 -13.2 28.6
 -4 -12 12 32.5 52.09
 -4 -12 12 24 41.7
 -4 -12 12 -7.7 9.2
 -5 12 13 25.5 25.8
 -5 12 13 17.4 40.3
 -5 -12 13 2.9 41.1
 5 -12 -13 26.6 32.1
 -5 -12 13 66.09 66.09
 -5 -12 13 9.6 20
 -5 -12 13 9.8 11.2
 5 -12 -13 -22.1 36.3
 -6 -12 14 0.6 8.8
 6 -12 -14 -6.3 5.9
 -6 -12 14 -1 22.7
 -6 13 -2 -18.9 19.1
 6 13 2 57.59 50.19
 -6 -13 -2 26.7 18.2
 6 -13 2 29.9 44.8
 6 -13 2 19.1 9
 6 -13 2 112.99 137.79
 6 -13 2 4.8 27.9
 -6 -13 -2 30.2 15.1
 5 13 3 -0.1 30.8
 -5 -13 -3 30.7 67.39
 5 -13 3 27.5 31.7
 -5 -13 -3 7.5 12.2
 -5 -13 -3 17.4 14.1
 5 -13 3 -6.4 31.6
 4 13 4 45.6 39.3
 -4 -13 -4 32.4 19.9
 4 -13 4 71.59 35.3
 4 -13 4 59.29 26.3
 -4 -13 -4 29.8 15.6
 3 13 5 202.58 29.8
 3 13 5 100.09 48.7
 3 -13 5 245.58 67.69
 3 -13 5 220.38 42.8
 -3 -13 -5 218.08 40.4
 -3 -13 -5 229.88 49.6
 2 13 6 698.33 154.78
 2 -13 6 824.02 141.49
 -2 -13 -6 1016.2 144.39
 -2 -13 -6 1193.68 144.79
 2 -13 6 998.5 131.49
 1 13 7 217.18 75.89
 1 13 7 434.66 57.89
 -1 -13 -7 416.06 73.79
 -1 -13 -7 437.36 78.69
 1 -13 7 362.76 57.99
 0 13 8 190.78 71.59
 0 13 8 369.26 49.5
 0 13 8 290.17 48.5
 0 -13 -8 247.78 60.69
 0 -13 8 494.85 77.39
 0 -13 8 233.58 71.59
 0 -13 -8 369.26 72.29
 -1 13 9 23.6 13.4
 -1 13 9 -7.1 39.6
 -1 13 9 24.7 13.9
 -1 -13 9 45.8 29.3
 1 -13 -9 33.1 39
 1 -13 -9 22.4 28.8
 -1 -13 9 7.1 45.7
 -1 -13 9 29 45.6
 1 -13 -9 37 52.99
 -2 13 10 7 51.49
 -2 13 10 -4.3 14.7
 -2 13 10 8.5 15.9
 -2 -13 10 -38.7 46.8
 -2 -13 10 -0.6 29.9
 2 -13 -10 -11 24.5
 2 -13 -10 15.5 29
 -2 -13 10 -21.5 22.7
 2 -13 -10 -18.1 23.8
 -3 13 11 74.69 31
 -3 13 11 30.4 64.79
 -3 13 11 141.69 34.4
 3 -13 -11 157.78 52.49
 -3 -13 11 90.99 30.4
 -3 -13 11 98.59 47.6
 3 -13 -11 85.19 43.3
 -3 -13 11 81.39 62.49
 -4 13 12 384.76 110.89
 -4 13 12 529.65 93.49
 -4 -13 12 695.73 85.99
 -4 -13 12 518.85 79.49
 -4 -13 12 481.85 129.29
 -4 -13 12 677.43 141.99
 4 -13 -12 599.14 113.59
 4 -13 -12 511.05 105.69
 -5 13 13 14.6 39
 -5 13 13 70.39 47.3
 5 -13 -13 76.09 57.39
 -5 -13 13 187.48 122.89
 -5 -13 13 62.69 17.9
 5 -13 -13 31.6 34.7
 -5 -13 13 25.3 49.99
 -5 -13 13 90.89 29.2
 6 14 2 65.99 40.8
 -6 -14 -2 84.59 29.9
 6 -14 2 30.9 90.09
 6 -14 2 110.69 23.3
 6 -14 2 121.19 43.9
 -6 -14 -2 103.99 23.8
 6 -14 2 113.49 51.79
 -6 -14 -2 102.79 83.09
 5 14 3 69.99 43.5
 -5 -14 -3 8.9 70.99
 5 -14 3 27.5 30.4
 -5 -14 -3 37.7 17.5
 5 -14 3 56.09 30.8
 5 -14 3 -98.89 65.19
 -5 -14 -3 52.39 22.7
 4 14 4 441.66 131.29
 4 -14 4 602.94 106.79
 -4 -14 -4 699.83 94.99
 4 -14 4 723.93 101.79
 -4 -14 -4 709.63 103.59
 3 14 5 21.5 75.89
 3 -14 5 9.3 27.5
 -3 -14 -5 41 20.6
 3 -14 5 81.19 25.8
 -3 -14 -5 47.2 22.9
 2 14 6 18.8 7
 2 14 6 10 63.79
 2 -14 6 -12.5 14.5
 -2 -14 -6 9.2 20.9
 2 -14 6 4.5 25.1
 -2 -14 -6 7 20.5
 1 14 7 20.3 9.4
 1 14 7 33.9 49.7
 1 -14 7 -9.3 23.2
 -1 -14 -7 28.9 24.5
 1 -14 7 -28.6 63.39
 0 14 8 837.32 115.19
 0 14 8 876.81 114.39
 0 -14 -8 683.73 130.89
 0 -14 8 894.11 143.29
 0 -14 8 755.02 130.79
 0 -14 -8 915.31 135.19
 -1 14 9 150.18 28.8
 -1 14 9 75.09 50.79
 -1 14 9 147.69 34.2
 -1 -14 9 146.59 45.3
 1 -14 -9 66.59 37.2
 -1 -14 9 34.1 49.9
 -1 -14 9 227.58 68.69
 1 -14 -9 205.18 45.7
 1 -14 -9 70.69 42
 -2 14 10 498.35 79.29
 -2 14 10 466.25 79.79
 2 -14 -10 577.74 102.19
 -2 -14 10 348.27 98.89
 -2 -14 10 661.73 127.39
 2 -14 -10 737.23 113.79
 2 -14 -10 521.85 88.89
 -2 -14 10 475.85 105.39
 -3 14 11 98.99 35.2
 -3 14 11 141.09 35.9
 -3 14 11 -10.4 67.99
 -3 -14 11 163.98 77.49
 3 -14 -11 134.39 45.7
 -3 -14 11 112.99 49.6
 -3 -14 11 107.59 34.7
 3 -14 -11 172.48 55.49
 -4 14 12 82.09 31.6
 -4 14 12 92.19 43.8
 -4 -14 12 -12 66.79
 -4 -14 12 66.29 20.3
 4 -14 -12 64.49 40.1
 4 -14 -12 20.9 40.1
 -4 -14 12 159.58 32
 -4 -14 12 113.69 61.69
 -5 14 13 -47.3 43.4
 -5 14 13 2.5 23.4
 -5 -14 13 -58.39 60.49
 5 -14 -13 42.6 39.8
 5 -14 -13 38.9 35
 -5 -14 13 2.6 10.6
 -5 -14 13 8.1 19.7
 6 15 2 53.59 44.9
 -6 -15 -2 -165.68 60.89
 6 -15 2 5.1 42.2
 6 -15 2 -58.29 76.89
 6 -15 2 0 7.6
 6 -15 2 7.4 32.4
 -6 -15 -2 20.2 18.8
 5 15 3 92.99 48.5
 5 -15 3 30.8 26.8
 -5 -15 -3 4.9 77.49
 5 -15 3 -26.8 89.99
 -5 -15 -3 9 16.2
 5 -15 3 34 30.4
 4 15 4 28 42.1
 -4 -15 -4 -12.7 13.1
 4 -15 4 -15.6 20
 4 -15 4 15.5 23.8
 4 -15 4 -33.5 71.59
 -4 -15 -4 14.5 16.3
 3 15 5 305.47 94.69
 3 -15 5 463.25 73.89
 -3 -15 -5 525.55 81.69
 3 -15 5 499.85 83.69
 2 15 6 126.59 62.69
 2 -15 6 106.29 36.8
 -2 -15 -6 139.79 38.8
 2 -15 6 12.4 73.29
 -2 -15 -6 58.09 32.9
 2 -15 6 190.18 36.1
 1 15 7 992.5 116.99
 1 15 7 557.74 148.19
 1 -15 7 769.42 130.09
 -1 -15 -7 946.71 136.79
 -1 -15 -7 861.71 139.09
 0 15 8 18.1 10.2
 0 15 8 -22.9 37.9
 0 15 8 12.8 14.7
 0 -15 8 36.4 42.8
 0 -15 -8 26.8 27.4
 0 -15 8 -5.4 25.3
 0 -15 -8 46.3 31.4
 0 -15 8 -29.9 56.09
 -1 15 9 146.59 28
 -1 15 9 139.59 35.3
 -1 15 9 7.9 52.19
 1 -15 -9 147.39 41.7
 -1 -15 9 215.28 53.69
 1 -15 -9 104.19 45.2
 -1 -15 9 137.89 62.89
 1 -15 -9 131.99 46.6
 -1 -15 9 104.59 53.19
 -2 15 10 9.8 12.8
 -2 15 10 48.9 63.69
 -2 15 10 10.9 18.2
 -2 -15 10 41.8 31.5
 2 -15 -10 -8.5 29.6
 2 -15 -10 30.5 28.9
 -2 -15 10 1.5 33.4
 -2 -15 10 47.9 55.59
 2 -15 -10 -25.6 25.4
 -3 15 11 14.2 62.09
 -3 15 11 154.08 38
 -3 15 11 79.99 28
 -3 -15 11 98.19 33.6
 3 -15 -11 279.27 65.19
 3 -15 -11 86.89 46.7
 -3 -15 11 47.4 42.1
 -3 -15 11 216.38 78.09
 -4 15 12 29 26.6
 -4 15 12 40.4 28.9
 -4 -15 12 96.39 82.29
 -4 -15 12 -19.8 38
 -4 -15 12 35.8 16.4
 4 -15 -12 20.2 39.8
 4 -15 -12 13.1 36.6
 -4 -15 12 37.9 16.9
 -5 15 13 469.75 95.19
 -5 15 13 487.75 108.59
 -5 -15 13 498.85 71.99
 5 -15 -13 425.16 120.19
 -5 -15 13 710.83 148.89
 5 -15 -13 617.24 116.29
 -5 -15 13 448.26 136.89
 -5 -15 13 455.55 79.49
 5 16 3 165.78 64.29
 5 -16 3 298.67 72.29
 -5 -16 -3 308.77 50.09
 -5 -16 -3 141.89 97.99
 -5 -16 -3 331.87 62.89
 5 -16 3 349.77 67.79
 5 -16 3 39.2 95.19
 4 16 4 157.18 67.19
 4 -16 4 83.19 94.69
 4 -16 4 282.87 57.69
 4 -16 4 283.57 61.29
 -4 -16 -4 282.47 48.3
 -4 -16 -4 240.38 53.49
 -3 -16 -5 117.59 38.3
 3 -16 5 61.49 83.09
 3 -16 5 178.98 43
 3 -16 5 134.49 41.4
 2 16 6 29.3 45
 -2 -16 -6 36.6 26.9
 2 -16 6 -5 71.19
 2 -16 6 25.5 20.7
 -2 -16 -6 40.5 26.7
 2 -16 6 126.49 37
 1 16 7 59.79 52.79
 1 16 7 65.09 17.3
 1 -16 7 59.79 78.79
 -1 -16 -7 75.99 33.7
 -1 -16 -7 113.29 42.2
 1 -16 7 49.8 28.9
 0 16 8 257.87 46
 0 16 8 292.27 43.3
 0 -16 -8 264.67 62.49
 0 -16 -8 274.27 62.79
 0 -16 8 334.67 64.59
 0 -16 8 137.89 66.99
 0 -16 -8 319.17 79.49
 0 -16 8 248.28 55.39
 0 -16 8 134.89 79.89
 -1 16 9 589.84 82.49
 -1 16 9 529.15 76.19
 1 -16 -9 539.45 91.09
 -1 -16 9 557.74 120.49
 -1 -16 9 309.67 113.89
 1 -16 -9 520.85 106.69
 1 -16 -9 514.55 100.99
 -1 -16 9 689.33 108.39
 -2 16 10 14.9 67.49
 -2 16 10 175.38 42.5
 -2 16 10 173.78 33.6
 -2 -16 10 118.79 52.39
 -2 -16 10 196.58 58.69
 -2 -16 10 305.17 87.39
 2 -16 -10 129.39 43.8
 2 -16 -10 269.47 81.69
 -3 16 11 56.79 23.8
 -3 16 11 23.8 66.89
 -3 16 11 33.1 26.9
 3 -16 -11 55.99 38.3
 3 -16 -11 48.7 40.9
 -3 -16 11 77.29 31.1
 -3 -16 11 127.99 73.59
 -3 -16 11 94.99 46.7
 -4 16 12 27.6 26.8
 -4 16 12 12.5 22.4
 -4 -16 12 -0.2 41.3
 4 -16 -12 49 45.1
 -4 -16 12 134.69 83.29
 4 -16 -12 -21.3 59.29
 -4 -16 12 55.49 19.5
 -4 -16 12 54.39 19.1
 -5 -16 13 -3.6 12.8
 5 17 3 -6.7 41.6
 -5 -17 -3 -1 16.4
 -5 -17 -3 -56.39 72.69
 5 -17 3 12.6 28.8
 5 -17 3 -19.5 90.19
 5 -17 3 -4.7 25.8
 4 17 4 28.3 47
 4 -17 4 33.6 28.9
 4 -17 4 44.2 28.4
 -4 -17 -4 -15.8 15.7
 4 -17 4 9.8 82.39
 -4 -17 -4 -2 17
 3 17 5 4.2 41.7
 -3 -17 -5 -0.7 21.5
 3 -17 5 -25.4 72.39
 3 -17 5 27.7 23.8
 3 -17 5 -9.6 21.4
 -2 -17 -6 1117.99 154.38
 2 -17 6 1020.3 153.18
 2 -17 6 923.31 140.19
 -2 -17 -6 968.2 156.78
 1 17 7 0.2 41.6
 -1 -17 -7 41.9 36.6
 -1 -17 -7 38.4 30
 1 -17 7 37.7 72.19
 1 -17 7 18.7 24.7
 0 17 8 151.28 75.29
 0 17 8 334.17 53.49
 0 -17 -8 375.46 73.49
 0 -17 -8 518.25 91.09
 0 -17 8 153.38 79.69
 0 -17 8 280.47 64.99
 0 -17 8 266.77 82.59
 0 -17 8 373.66 71.89
 0 -17 -8 427.66 70.29
 -1 17 9 42.5 19.2
 -1 17 9 40.2 13.3
 -1 17 9 38.7 66.79
 1 -17 -9 27.7 33.4
 -1 -17 9 37.3 44.3
 1 -17 -9 24.5 35.1
 -1 -17 9 50.39 89.09
 1 -17 -9 28.2 30.8
 -1 -17 9 68.09 38.2
 -2 17 10 59.29 70.79
 -2 17 10 37.5 25.2
 -2 17 10 28.8 12.7
 -2 -17 10 0.5 54.19
 -2 -17 10 36.6 39.2
 2 -17 -10 52.09 34
 -2 -17 10 26.4 44.1
 2 -17 -10 87.79 45.7
 -3 17 11 -6.4 22.4
 -3 17 11 -3.7 12.9
 3 -17 -11 -30.8 30.7
 -3 -17 11 -45.4 63.09
 -3 -17 11 -13 36.7
 3 -17 -11 -9.1 34
 -3 -17 11 -38.2 19.5
 -4 17 12 410.96 85.89
 -4 17 12 310.47 73.99
 4 -17 -12 436.06 114.09
 4 -17 -12 415.56 94.69
 -4 -17 12 443.16 132.79
 -4 -17 12 521.55 124.09
 -4 -17 12 399.76 68.59
 -4 -17 12 561.74 69.59
 5 18 3 44.8 49.1
 5 -18 3 156.08 47.1
 -5 -18 -3 106.79 36.3
 5 -18 3 171.48 47
 4 18 4 80.29 55.89
 4 -18 4 246.28 54.79
 -4 -18 -4 130.69 33.3
 4 -18 4 5 83.79
 -4 -18 -4 78.59 31.5
 4 -18 4 120.99 40.3
 3 18 5 111.39 65.19
 -3 -18 -5 246.98 59.39
 3 -18 5 263.37 61.29
 3 -18 5 165.78 101.79
 3 -18 5 247.38 53.99
 2 18 6 94.99 51.39
 2 -18 6 93.39 31.7
 2 -18 6 42.4 76.19
 -2 -18 -6 34.8 29.2
 2 -18 6 35.3 24.7
 -2 -18 -6 12.7 25.2
 1 18 7 10 11.2
 1 18 7 -33.6 36.2
 -1 -18 -7 -27.4 21.4
 1 -18 7 17.2 23.3
 -1 -18 -7 7.1 33.7
 1 -18 7 -25.6 64.39
 0 18 8 142.19 36.3
 0 18 8 44.5 62.99
 0 -18 -8 116.69 48
 0 -18 8 55.69 59.69
 0 -18 -8 180.18 46.1
 0 -18 -8 296.47 76.59
 0 -18 8 224.88 44.2
 0 -18 8 120.09 59.39
 0 -18 8 144.39 39.1
 -1 18 9 351.86 49.1
 -1 18 9 327.67 58.69
 -1 -18 9 230.68 81.39
 -1 -18 9 248.98 59.99
 1 -18 -9 275.07 70.19
 -1 -18 9 425.26 100.09
 1 -18 -9 282.27 70.09
 -1 -18 9 316.17 69.69
 1 -18 -9 414.46 92.99
 -2 18 10 1.6 65.29
 -2 18 10 70.49 29.8
 -2 18 10 57.69 16
 -2 -18 10 68.99 43.6
 2 -18 -10 113.19 52.79
 2 -18 -10 78.59 40.4
 -2 -18 10 116.49 46.6
 -2 -18 10 128.29 72.09
 -3 18 11 268.27 43.3
 -3 18 11 248.78 61.69
 -3 -18 11 230.58 68.79
 3 -18 -11 246.98 93.69
 3 -18 -11 142.69 77.79
 -3 -18 11 255.67 66.99
 -3 -18 11 270.47 111.59
 -4 18 12 -7.9 16.3
 -4 18 12 16.3 30.2
 -4 -18 12 35.1 17.6
 -4 -18 12 -8.7 16.7
 -4 -18 12 52.99 23.2
 4 -18 -12 31.2 39.5
 -4 -18 12 -9.7 40.4
 -4 -18 12 9.9 79.19
 4 -18 -12 -12.8 36.6
 4 19 4 3.9 42.4
 4 -19 4 -43.1 76.39
 -4 -19 -4 9.2 20.6
 4 -19 4 0.1 29
 -4 -19 -4 4.2 23.5
 4 -19 4 17.2 27.8
 3 19 5 92.89 61.99
 3 -19 5 235.58 51.09
 -3 -19 -5 148.79 47.6
 3 -19 5 57.09 97.59
 3 -19 5 284.87 57.79
 2 19 6 99.29 59.09
 2 -19 6 120.69 35.7
 -2 -19 -6 112.39 40.5
 2 -19 6 64.29 32.6
 -2 -19 -6 81.39 41.2
 2 -19 6 20.6 70.29
 1 -19 7 610.14 100.69
 1 -19 7 456.35 156.28
 -1 -19 -7 712.53 119.09
 -1 -19 -7 731.63 127.29
 0 19 8 -1.5 15.8
 0 19 8 -78.39 55.19
 0 -19 -8 -0.6 27.4
 0 -19 8 0.4 47.2
 0 -19 -8 -8 29
 0 -19 -8 -6.1 30
 0 -19 8 -24.7 45.1
 0 -19 8 -16 19.3
 -1 19 9 -10.6 18
 -1 19 9 -58.49 61.29
 1 -19 -9 8.7 31.6
 -1 -19 9 2.2 32
 -1 -19 9 34 51.29
 1 -19 -9 -13.1 34.7
 -1 -19 9 -12.5 50.39
 -1 -19 9 -4.3 20
 1 -19 -9 10.2 36.1
 -2 19 10 -11.3 21.4
 -2 19 10 2 79.69
 -2 19 10 13 8.8
 2 -19 -10 -5.6 35.3
 -2 -19 10 26.9 66.99
 -2 -19 10 14.9 40.1
 2 -19 -10 -50.69 52.39
 -2 -19 10 8.1 17.7
 -2 -19 10 9.7 61.59
 -3 19 11 129.99 25.8
 -3 19 11 90.59 38.1
 -3 -19 11 108.09 54.59
 -3 -19 11 90.69 33.8
 3 -19 -11 99.29 55.09
 3 -19 -11 116.09 50.89
 -3 -19 11 176.48 94.79
 -3 -19 11 77.19 36.6
 -4 -20 -4 332.47 92.09
 4 -20 4 374.36 98.39
 4 -20 4 526.15 97.09
 3 20 5 -19.8 49.3
 3 -20 5 32 27.4
 3 -20 5 31.6 27.6
 -3 -20 -5 1.8 29.1
 3 -20 5 54.89 71.59
 2 20 6 -11.9 53.09
 -2 -20 -6 22.1 30.8
 2 -20 6 44 27.8
 2 -20 6 46.8 31.6
 2 -20 6 -7.4 67.79
 -2 -20 -6 -4.9 32
 1 20 7 -73.39 58.89
 1 -20 7 -24.5 56.59
 -1 -20 -7 9.7 28.4
 1 -20 7 8.5 20.8
 -1 -20 -7 -5.9 38.6
 0 20 8 287.87 57.39
 0 -20 8 380.56 101.89
 0 -20 -8 435.96 79.19
 0 -20 -8 399.26 83.59
 0 -20 8 433.46 65.49
 0 -20 8 171.88 89.09
 0 -20 -8 420.26 96.29
 -1 20 9 33.5 24.1
 1 -20 -9 66.09 41.2
 -1 -20 9 -38.2 52.29
 1 -20 -9 73.69 52.49
 -1 -20 9 15.8 19.5
 -1 -20 9 -43.5 22.3
 1 -20 -9 52.59 45.3
 -1 -20 9 86.39 61.99
 -2 20 10 313.97 68.69
 -2 -20 10 337.47 61.49
 -2 -20 10 387.06 84.89
 -2 -20 10 351.16 101.59
 2 -20 -10 326.77 79.89
 -2 -20 10 352.06 102.99
 2 -20 -10 244.08 82.29
 -3 20 11 -10.8 26.8
 -3 -20 11 44.2 51.79
 -3 -20 11 0.8 27
 -3 -20 11 100.79 89.39
 3 -20 -11 72.59 41
 3 21 5 -13.2 61.69
 -3 -21 -5 26.2 33.2
 3 -21 5 97.69 35.3
 3 -21 5 10.7 28
 3 -21 5 34 106.49
 2 -21 6 160.48 95.39
 2 -21 6 378.16 68.79
 -2 -21 -6 468.45 112.79
 2 -21 6 400.46 68.49
 -2 -21 -6 210.18 67.79
 1 21 7 -1.9 100.59
 1 -21 7 -2.5 61.29
 -1 -21 -7 100.79 53.29
 -1 -21 -7 68.09 45.9
 1 -21 7 113.59 34.4
 0 21 8 190.78 93.19
 0 -21 -8 164.88 58.49
 0 -21 8 72.69 69.39
 0 -21 8 166.58 79.79
 0 -21 -8 178.08 53.19
 0 -21 8 237.18 48.4
 0 -21 -8 193.68 55.09
 -1 21 9 7.4 22.5
 -1 21 9 38.4 72.79
 -1 -21 9 12.1 16.9
 -1 -21 9 14.7 56.39
 1 -21 -9 -14.3 37.8
 1 -21 -9 -10.2 34
 1 -21 -9 17.7 31.2
 -1 -21 9 -34 55.29
 -1 -21 9 2 27.4
 -2 21 10 27.8 28.7
 -2 -21 10 14.4 40.1
 -2 -21 10 57.69 68.89
 2 -21 -10 73.59 44.3
 -2 -21 10 -17.6 43.1
 2 22 6 -141.19 61.39
 2 -22 6 38.7 30.5
 2 -22 6 15.7 24.4
 -2 -22 -6 -4.5 39.9
 -2 -22 -6 -4.6 27.2
 2 -22 6 0.9 57.69
 1 22 7 -2.4 75.29
 -1 -22 -7 -6.6 34
 1 -22 7 5 64.19
 1 -22 7 24.4 22.1
 -1 -22 -7 21.3 35.1
 0 22 8 61.69 79.19
 0 -22 8 -27.6 53.89
 0 -22 8 -17.5 17.3
 0 -22 -8 3.1 36.4
 0 -22 -8 4.1 34.1
 0 -22 8 5.3 60.49
 0 -22 -8 -10.3 38
 -1 22 9 293.37 70.69
 -1 22 9 222.08 147.59
 1 -22 -9 379.86 82.09
 -1 -22 9 430.56 55.19
 -1 -22 9 404.76 57.69
 -1 -22 9 174.68 91.29
 1 -22 -9 331.67 79.79
 -1 -22 9 254.37 91.29
 -1 -22 9 378.46 74.19
 -7 0 -2 571.74 92.79
 -7 0 -2 642.54 103.39
 7 0 2 581.24 95.99
 7 0 2 535.05 83.69
 -6 0 -3 0.5 10
 -6 0 -3 30.8 28.5
 6 0 3 1.9 19.8
 6 0 3 -11.6 9.8
 -5 0 -4 439.66 63.89
 -5 0 -4 363.36 71.89
 5 0 4 398.16 56.99
 5 0 4 326.87 70.99
 -4 0 -5 5.2 8.2
 -4 0 -5 -9.2 22
 4 0 5 11.1 22
 4 0 5 -5.8 6.3
 -3 0 -6 35.3 13.3
 -3 0 -6 35.3 18
 3 0 6 22.2 7.4
 2 0 7 4.6 5.5
 -2 0 -7 -0.2 13.4
 2 0 7 4.5 7
 -2 0 -7 0.9 3.4
 1 0 8 2599.74 338.17
 -1 0 -8 2418.56 352.76
 -1 0 -8 2907.01 340.37
 1 0 8 2521.85 347.37
 1 0 -10 1975.8 251.57
 -1 0 10 2204.78 247.78
 -1 0 10 1402.26 256.77
 1 0 -10 1636.24 259.97
 -1 0 10 1839.22 247.48
 2 0 -11 7.7 18.8
 -2 0 11 -2.3 17.6
 -2 0 11 0.7 11.5
 -2 0 11 -1.3 26.8
 -3 0 12 33.1 30.2
 -3 0 12 68.89 40.5
 -3 0 12 18.6 24.6
 3 0 -12 -41.1 29.6
 -4 0 13 19.1 49.8
 4 0 -13 -9.8 7.5
 4 0 -13 4.6 40.4
 -4 0 13 -40.4 27.9
 -5 0 14 585.44 101.69
 -5 0 14 630.54 134.89
 5 0 -14 525.05 76.89
 5 0 -14 529.95 117.89
 -5 0 14 570.84 89.29
 -6 0 15 36.9 43.8
 6 0 -15 55.19 64.59
 -6 0 15 -22 22.3
 -6 0 15 -58.89 31.8
 6 0 -15 -4.3 12
 7 1 2 51.29 30.2
 -7 1 -2 45.7 21.7
 7 1 2 34.8 17.7
 -7 1 -2 91.99 37.6
 7 -1 2 76.19 21.3
 -7 -1 -2 64.79 37.1
 -7 -1 -2 155.68 35.4
 7 -1 2 52.69 31.6
 -6 1 -3 3.5 10.4
 6 1 3 -10.2 10.1
 -6 1 -3 40.4 27.3
 6 1 3 5.5 18.9
 -6 -1 -3 -11.9 25.3
 6 -1 3 15.3 20.4
 -6 -1 -3 7.2 11.3
 6 -1 3 -7 9.5
 -5 1 -4 211.28 52.49
 -5 1 -4 289.87 46.6
 5 1 4 239.38 58.69
 5 1 4 264.37 40.6
 5 -1 4 262.97 59.29
 -5 -1 -4 247.68 45.1
 5 -1 4 220.58 38.1
 -5 -1 -4 231.08 58.79
 4 1 5 237.38 60.99
 -4 1 -5 252.67 48.6
 4 1 5 214.28 37.1
 -4 1 -5 238.08 42.2
 -4 -1 -5 272.27 43.7
 4 -1 5 224.58 35.4
 4 -1 5 298.97 63.69
 -4 -1 -5 166.88 48.6
 -4 -1 -5 241.58 33.9
 -3 1 -6 1103.09 157.98
 3 1 6 1209.18 151.28
 -3 1 -6 1147.99 154.98
 -3 -1 -6 947.71 163.98
 3 -1 6 1327.47 155.98
 -3 -1 -6 1133.39 158.08
 -3 -1 -6 1150.98 149.88
 3 -1 6 1149.69 150.48
 -2 1 -7 1110.29 147.89
 2 1 7 1112.09 135.69
 2 1 7 1059.29 140.49
 -2 1 -7 843.02 138.39
 -2 -1 -7 1010.2 145.89
 2 -1 7 1055.59 140.29
 2 -1 7 1100.99 134.79
 -2 -1 -7 1034.5 134.29
 -1 1 -8 263.67 42.1
 -1 1 -8 242.28 55.39
 1 -1 8 308.37 56.69
 -1 -1 -8 315.57 37.2
 1 -1 8 266.77 37.5
 -1 -1 -8 179.98 52.19
 0 1 9 381.06 83.99
 0 1 9 322.27 44.9
 0 -1 -9 171.98 49.8
 0 -1 -9 204.18 45.4
 0 -1 9 279.87 63.59
 -1 1 10 45.1 36
 1 1 -10 121.39 35.8
 -1 1 10 201.58 33.9
 1 1 -10 23.9 25.8
 1 -1 -10 121.79 42.4
 1 -1 -10 54.49 29
 2 1 -11 734.23 105.29
 -2 1 11 669.03 96.89
 -2 1 11 636.94 116.49
 -2 1 11 630.94 96.79
 -2 -1 11 663.23 97.59
 2 -1 -11 632.54 100.39
 2 -1 -11 648.34 84.79
 -2 -1 11 529.45 114.79
 -2 -1 11 706.93 93.79
 3 1 -12 1481.05 219.38
 -3 1 12 1245.18 228.08
 -3 1 12 1656.03 210.78
 -3 -1 12 1447.36 209.58
 3 -1 -12 1572.54 195.78
 -3 -1 12 1689.23 213.58
 -3 -1 12 1654.93 233.78
 3 -1 -12 1313.67 214.48
 -4 1 13 861.71 162.58
 -4 1 13 736.23 118.69
 4 1 -13 745.83 134.59
 4 -1 -13 697.93 130.39
 4 -1 -13 739.13 99.59
 -4 -1 13 716.83 146.59
 -4 -1 13 859.51 124.59
 5 1 -14 -10.2 48.2
 -5 1 14 -7.1 45.6
 -5 1 14 33.8 37.3
 -5 1 14 13 19.5
 -5 -1 14 46.4 48.7
 -5 -1 14 54.19 24.3
 -5 -1 14 23 39.5
 5 -1 -14 51.19 54.59
 5 -1 -14 36.4 12.3
 -6 1 15 8.3 26.1
 -6 1 15 27.8 38.5
 6 1 -15 95.89 70.09
 -6 1 15 -15.9 53.19
 6 -1 -15 -21.3 56.59
 -6 -1 15 48.6 43.5
 6 -1 -15 8.3 12.1
 -6 -1 15 17.7 26.2
 -6 -1 15 -12.9 46
 -7 2 -2 51.09 48
 -7 2 -2 2.8 12.8
 7 2 2 -11.3 20.1
 7 2 2 -0.8 15.9
 -7 -2 -2 21.8 35.8
 -7 -2 -2 12.6 14.8
 7 -2 2 17.1 12.8
 7 -2 2 22.3 24.7
 -6 2 -3 888.41 124.99
 6 2 3 795.22 123.29
 6 2 3 865.31 115.39
 -6 2 -3 897.51 121.49
 6 -2 3 817.32 127.99
 -6 -2 -3 753.82 130.89
 6 -2 3 769.02 112.79
 -6 -2 -3 856.51 122.09
 5 2 4 48.5 25.4
 5 2 4 32.3 14.3
 -5 2 -4 62.49 26.1
 -5 2 -4 44.5 16.8
 -5 -2 -4 53.09 12.7
 -5 -2 -4 14.1 33.3
 -5 -2 -4 34.2 19.3
 5 -2 4 52.29 13.6
 -4 2 -5 132.89 34.9
 4 2 5 102.49 36.4
 -4 2 -5 117.79 29.3
 4 2 5 136.59 26.2
 4 -2 5 134.79 22.9
 -4 -2 -5 131.59 31
 4 -2 5 96.09 37
 -4 -2 -5 148.59 21.5
 -4 -2 -5 117.59 44.7
 -3 2 -6 81.19 19.5
 3 2 6 112.89 18.5
 -3 2 -6 59.29 20.9
 -3 -2 -6 79.89 13.7
 -3 -2 -6 21.4 27.9
 -3 -2 -6 59.09 18.2
 3 -2 6 88.69 14.7
 -2 2 -7 734.03 89.79
 2 2 7 740.33 97.69
 -2 2 -7 704.73 103.79
 2 2 7 615.74 92.59
 2 -2 7 666.43 96.49
 2 -2 7 770.22 91.39
 -2 -2 -7 702.93 91.19
 -2 -2 -7 537.35 100.59
 -1 2 -8 -12.4 10.1
 1 2 8 26.4 15.4
 -1 -2 -8 -57.99 23
 0 2 -9 1296.17 179.78
 0 2 9 1357.26 180.48
 0 2 9 1388.26 191.48
 0 2 -9 1077.49 193.58
 0 -2 9 1427.66 176.98
 0 -2 9 1308.17 196.58
 0 -2 -9 1539.05 180.08
 0 -2 -9 1293.37 171.88
 0 -2 -9 1248.18 191.08
 -1 2 10 507.95 78.79
 -1 2 10 690.23 84.19
 -1 2 10 431.86 103.19
 1 2 -10 578.64 95.59
 1 2 -10 502.55 85.19
 -1 -2 10 329.37 90.89
 1 -2 -10 570.54 104.29
 1 -2 -10 595.54 82.89
 -1 -2 10 423.16 80.59
 -2 2 11 487.15 85.29
 -2 2 11 467.35 97.39
 -2 2 11 565.44 82.49
 -2 -2 11 604.84 86.39
 2 -2 -11 588.44 70.89
 -2 -2 11 560.84 80.29
 -2 -2 11 517.65 108.79
 2 -2 -11 433.36 85.09
 -3 2 12 119.49 33.8
 3 2 -12 0.2 34
 -3 2 12 17.5 31
 -3 2 12 -37.5 22.1
 3 -2 -12 -12.6 30.6
 -3 -2 12 2.3 35.9
 -3 -2 12 8.6 18.8
 -3 -2 12 -4.3 30.7
 3 -2 -12 11 5.1
 -4 2 13 75.09 39.1
 -4 2 13 126.89 32
 -4 2 13 73.39 45.1
 4 2 -13 23.6 46.6
 4 -2 -13 80.19 15.7
 -4 -2 13 68.49 39.8
 4 -2 -13 55.59 49.4
 -4 -2 13 46.4 43.8
 -5 2 14 92.29 51.79
 -5 2 14 90.99 28.2
 5 2 -14 35.9 54.69
 -5 2 14 88.49 42.3
 -5 -2 14 87.79 52.89
 5 -2 -14 78.99 52.59
 -5 -2 14 50.39 25.9
 5 -2 -14 63.19 15.7
 -5 -2 14 91.09 45.7
 -6 2 15 378.96 68.99
 6 2 -15 237.58 100.09
 -6 2 15 221.38 77.09
 -6 2 15 333.97 85.19
 -6 -2 15 395.96 72.19
 6 -2 -15 257.07 49.9
 -6 -2 15 517.85 125.49
 -6 -2 15 395.46 90.99
 6 -2 -15 313.67 99.79
 7 3 2 85.89 26.1
 7 3 2 138.79 37.1
 -7 3 -2 67.59 32.9
 -7 3 -2 120.89 30.8
 -7 -3 -2 57.69 24
 7 -3 2 116.09 24
 7 -3 2 91.39 34.9
 -7 -3 -2 164.78 52.49
 -6 3 -3 40.5 17.9
 6 3 3 19.7 22
 -6 3 -3 49.8 26.1
 6 3 3 83.29 22.3
 -6 -3 -3 58.09 17.9
 6 -3 3 33.4 25.6
 -6 -3 -3 34.8 9.8
 6 -3 3 57.39 15
 -6 -3 -3 31.7 37.7
 -5 3 -4 303.17 59.49
 5 3 4 354.86 64.89
 5 3 4 334.57 54.49
 -5 3 -4 336.77 57.19
 5 -3 4 415.26 74.69
 -5 -3 -4 349.27 58.49
 -5 -3 -4 467.15 83.19
 5 -3 4 356.86 50.79
 -5 -3 -4 341.47 49.9
 4 3 5 96.89 33
 -4 3 -5 101.39 28.4
 4 3 5 142.09 27.7
 -4 3 -5 101.99 26.1
 -4 -3 -5 169.48 49.4
 4 -3 5 109.59 38.1
 4 -3 5 117.39 20.9
 -4 -3 -5 120.19 29.7
 -4 -3 -5 107.89 19.6
 -3 3 -6 2121.49 274.27
 -3 3 -6 2168.28 282.67
 3 3 6 2041.1 275.97
 3 -3 6 2141.79 274.47
 -3 -3 -6 2189.68 274.67
 -3 -3 -6 2145.49 282.97
 2 3 7 34.6 12.6
 -2 3 -7 13.7 16.1
 2 -3 7 38.5 13.1
 -2 -3 -7 16.6 14.2
 2 -3 7 40.7 8.1
 -2 -3 -7 28.5 8
 1 3 8 874.81 115.99
 1 3 8 819.22 114.79
 -1 3 -8 974.4 129.19
 -1 3 -8 696.63 107.19
 1 -3 8 1038 120.29
 -1 -3 -8 826.82 109.59
 1 -3 8 763.12 104.09
 -1 -3 -8 791.32 104.99
 0 3 -9 81.49 32
 0 3 -9 76.79 26.7
 0 3 9 35.5 19.2
 0 3 9 56.79 24.1
 0 -3 9 59.29 21.9
 0 -3 -9 74.29 33.6
 0 -3 -9 56.29 20.7
 0 -3 9 71.89 34.4
 -1 3 10 41.4 28.6
 1 3 -10 50.89 27.7
 1 3 -10 158.28 38.8
 -1 3 10 148.39 33
 -1 3 10 79.69 24.9
 1 -3 -10 97.39 39.4
 -1 -3 10 110.29 28.8
 1 -3 -10 73.89 28.6
 -2 3 11 292.47 71.89
 -2 3 11 345.47 58.99
 2 3 -11 527.95 77.29
 -2 3 11 253.27 65.89
 -2 -3 11 368.66 52.29
 2 -3 -11 329.87 64.89
 -2 -3 11 352.66 45.4
 2 -3 -11 447.86 78.59
 -2 -3 11 264.47 66.69
 -2 -3 11 350.06 64.09
 3 3 -12 1298.67 226.08
 -3 3 12 1539.35 213.68
 -3 3 12 1568.34 234.48
 3 -3 -12 1675.43 201.28
 -3 -3 12 1753.02 243.38
 -3 -3 12 1946.91 223.98
 -3 -3 12 1323.27 207.08
 3 -3 -12 1654.03 222.98
 -4 3 13 66.99 35.1
 4 3 -13 49 48.3
 -4 3 13 100.89 51.29
 -4 3 13 23.7 43.6
 -4 3 13 75.59 23.4
 -4 -3 13 35.4 37.5
 4 -3 -13 71.69 15.2
 4 -3 -13 94.69 47.8
 -4 -3 13 129.39 47.2
 4 -3 -13 129.39 31.3
 5 3 -14 125.39 73.19
 -5 3 14 206.38 59.69
 -5 3 14 308.77 91.19
 -5 3 14 319.97 55.99
 5 -3 -14 173.78 69.89
 -5 -3 14 276.17 52.09
 -5 -3 14 260.27 78.79
 -5 -3 14 266.27 69.49
 5 -3 -14 247.28 37.2
 -6 3 15 125.89 81.39
 -6 3 15 78.19 57.59
 6 3 -15 125.29 76.99
 -6 3 15 59.69 30.7
 6 -3 -15 60.39 64.59
 -6 -3 15 14.1 47.5
 -6 -3 15 143.89 38.9
 -6 -3 15 23.6 63.59
 6 -3 -15 52.59 20
 7 4 2 200.98 53.29
 -7 4 -2 216.58 47.3
 -7 4 -2 283.97 56.49
 -7 -4 -2 229.58 48.9
 -7 -4 -2 194.48 63.89
 7 -4 2 179.48 39.7
 7 -4 2 189.18 50.59
 -6 4 -3 135.29 35.5
 6 4 3 122.79 29.1
 -6 4 -3 100.59 28.9
 -6 -4 -3 138.59 35.5
 6 -4 3 143.29 27.2
 -6 -4 -3 196.88 71.59
 6 -4 3 167.48 44.3
 -6 -4 -3 150.68 24.5
 -5 4 -4 692.93 99.49
 5 4 4 706.23 104.29
 -5 4 -4 668.13 97.39
 5 4 4 641.54 95.49
 -5 -4 -4 701.83 91.79
 5 -4 4 579.54 107.89
 -5 -4 -4 744.73 122.79
 -5 -4 -4 662.23 100.59
 5 -4 4 729.03 92.69
 -4 4 -5 370.26 56.59
 4 4 5 311.07 51.09
 4 4 5 273.87 65.09
 -4 4 -5 323.17 50.79
 -4 -4 -5 333.97 55.49
 -4 -4 -5 264.07 70.89
 -4 -4 -5 341.47 47
 4 -4 5 241.98 67.99
 4 -4 5 388.06 47.6
 -3 4 -6 -9.2 10.5
 -3 4 -6 9.9 5.6
 -3 -4 -6 1.1 5.8
 3 -4 6 8.9 5
 -3 -4 -6 4.2 9.8
 -2 4 -7 -8.1 15.5
 2 4 7 12 11.8
 2 4 7 1.6 6.2
 2 -4 7 4.9 3.2
 -2 -4 -7 0.8 4.8
 -2 -4 -7 11.9 13.3
 2 -4 7 -1.9 6.5
 1 4 8 1482.15 224.78
 -1 4 -8 1424.26 229.98
 1 4 8 2008.6 228.18
 1 -4 8 1702.43 216.58
 1 -4 8 2034.5 230.58
 -1 -4 -8 1584.84 233.08
 -1 -4 -8 1601.04 217.98
 0 4 9 1190.18 163.98
 0 4 -9 957.6 167.68
 0 -4 -9 1280.57 171.18
 0 -4 9 828.22 169.38
 0 -4 -9 1294.27 154.68
 0 -4 9 1123.99 152.68
 1 4 -10 964.8 152.48
 -1 4 10 1071.99 161.38
 -1 4 10 1223.88 147.59
 -1 4 10 1030 152.88
 1 -4 -10 1033.7 162.28
 -1 -4 10 1064.79 149.69
 -1 -4 10 1097.99 163.78
 1 -4 -10 1117.79 149.19
 -2 4 11 287.77 76.89
 -2 4 11 286.47 79.79
 2 4 -11 406.06 85.29
 -2 4 11 407.76 68.09
 -2 -4 11 481.45 56.29
 -2 -4 11 526.35 78.19
 -2 -4 11 429.06 90.19
 2 -4 -11 520.85 68.59
 2 -4 -11 359.96 74.09
 2 -4 -11 289.47 76.69
 -3 4 12 33.7 27.4
 3 4 -12 43.3 44.5
 -3 4 12 12.1 28.9
 -3 4 12 58.29 42.1
 3 -4 -12 41.6 18.5
 -3 -4 12 41 43.5
 -3 -4 12 42.7 16.2
 -3 -4 12 19.6 34.1
 3 -4 -12 -11 32.7
 3 -4 -12 40.4 9
 -3 -4 12 52.79 9.4
 -4 4 13 139.29 57.59
 -4 4 13 38.1 47.3
 4 4 -13 80.99 59.39
 -4 4 13 121.29 32.4
 -4 4 13 26.9 33.5
 4 -4 -13 73.89 43.5
 4 -4 -13 80.29 15.9
 -4 -4 13 64.99 46.8
 4 -4 -13 154.78 35
 -4 -4 13 115.59 47
 -5 4 14 533.05 140.69
 -5 4 14 549.74 106.29
 -5 4 14 575.64 101.69
 5 4 -14 602.44 136.79
 -5 -4 14 705.63 124.09
 -5 -4 14 715.93 101.29
 -5 -4 14 658.53 137.39
 5 -4 -14 616.74 128.69
 5 -4 -14 734.23 97.59
 5 -4 -14 662.23 88.09
 -6 4 15 59.99 51.49
 -6 4 15 162.18 71.39
 -6 4 15 64.49 38.4
 6 4 -15 74.19 83.59
 -6 -4 15 106.59 38.3
 6 -4 -15 226.98 111.69
 -6 -4 15 133.09 102.19
 -6 -4 15 11 74.69
 6 -4 -15 107.49 22.7
 -7 5 -2 27 24.3
 7 5 2 -0.7 18.5
 -7 5 -2 16.3 16.2
 7 5 2 -3.4 17.4
 7 -5 2 -12.3 39.6
 -7 -5 -2 9.3 16.4
 -7 -5 -2 -1.5 5.9
 -7 -5 -2 -15.3 39.1
 7 -5 2 -4.8 10.7
 6 5 3 25.2 20.2
 6 5 3 -1.8 15.3
 -6 5 -3 3.4 20.2
 -6 5 -3 3 11
 6 -5 3 12.5 9.5
 -6 -5 -3 4.4 9
 6 -5 3 -17.8 18.2
 -6 -5 -3 3.1 7.9
 -6 -5 -3 26.9 42
 5 5 4 5.9 18.1
 -5 5 -4 3.1 11.3
 -5 5 -4 29.2 17.6
 -5 -5 -4 32.2 9.8
 -5 -5 -4 12.9 12.2
 5 -5 4 26.6 10.1
 5 -5 4 -9.8 34.1
 -5 -5 -4 -34.3 40.1
 5 -5 4 -9.4 24.4
 -4 5 -5 1390.86 171.08
 4 5 5 1053.29 178.88
 -4 5 -5 1480.55 179.18
 -4 -5 -5 1421.86 199.58
 -4 -5 -5 1247.58 170.48
 4 -5 5 1191.48 186.68
 4 -5 5 1331.17 170.38
 -4 -5 -5 1330.47 179.28
 3 5 6 122.79 32.9
 -3 5 -6 62.69 20.4
 3 -5 6 45.2 11
 -3 -5 -6 77.29 22.4
 -3 -5 -6 43.9 11.9
 -2 5 -7 687.33 113.39
 2 5 7 848.62 110.19
 2 5 7 804.92 106.19
 -2 -5 -7 744.73 100.69
 -2 -5 -7 647.74 110.09
 2 -5 7 787.62 104.49
 1 5 8 120.09 31
 1 5 8 25.3 11.7
 -1 5 -8 39 20.6
 1 -5 8 27.9 8.4
 -1 -5 -8 32.9 20.2
 -1 -5 -8 30.7 9.2
 0 5 -9 106.69 35.9
 0 5 9 170.28 42.8
 0 5 9 258.67 48.7
 0 5 -9 137.09 36.1
 0 -5 -9 108.79 39
 0 -5 9 141.99 33.9
 -1 5 10 14.3 18.2
 1 5 -10 21.8 24.5
 -1 5 10 -8.7 20.6
 -1 5 10 11.1 16.7
 1 -5 -10 0.4 11.8
 1 -5 -10 6.5 15.8
 -1 -5 10 18.8 27.1
 -1 -5 10 51.89 20.7
 1 -5 -10 3.8 22.8
 -2 5 11 307.17 49.3
 2 5 -11 189.08 59.99
 -2 5 11 145.29 50.89
 2 -5 -11 141.19 47.7
 2 -5 -11 256.97 47.2
 2 -5 -11 208.68 54.49
 -2 -5 11 233.88 31.6
 -2 -5 11 264.87 69.09
 -2 -5 11 236.08 57.79
 -3 5 12 -8.5 22.8
 3 5 -12 -6 49.6
 -3 5 12 -22.8 26.3
 -3 5 12 -31.8 29.7
 3 -5 -12 17.1 16.9
 -3 -5 12 12.1 5.5
 -3 -5 12 -27.3 29.4
 -3 -5 12 94.69 42.7
 -4 5 13 787.02 128.29
 -4 5 13 586.74 153.48
 4 5 -13 665.73 150.78
 -4 5 13 820.02 122.99
 -4 -5 13 915.81 142.49
 -4 -5 13 963.7 112.59
 4 -5 -13 932.21 124.99
 4 -5 -13 844.82 112.29
 4 -5 -13 961.5 143.19
 -4 -5 13 646.44 148.49
 -5 5 14 28.3 32.6
 -5 5 14 97.09 26.2
 5 5 -14 -18.9 48.8
 -5 5 14 28.1 45.6
 -5 -5 14 28.8 46.3
 5 -5 -14 92.19 54.99
 5 -5 -14 43.9 20.5
 -5 -5 14 61.39 23.1
 5 -5 -14 60.79 12.8
 -5 -5 14 23.2 44.7
 -6 5 15 104.99 49.1
 6 5 -15 41.7 123.89
 -6 5 15 -0.2 50.09
 6 -5 -15 89.69 25.6
 -6 -5 15 113.29 53.49
 6 -5 -15 104.39 85.89
 -6 -5 15 100.29 54.39
 6 -5 -15 79.39 18.4
 -6 -5 15 106.79 36.5
 7 6 2 274.07 65.89
 -7 6 -2 322.27 57.49
 7 6 2 241.08 49.8
 -7 6 -2 242.38 54.59
 -7 -6 -2 296.17 41.9
 -7 -6 -2 242.88 82.79
 -7 -6 -2 210.78 53.49
 7 -6 2 227.68 42.9
 7 -6 2 286.17 64.69
 -6 6 -3 350.96 60.69
 6 6 3 361.76 64.89
 -6 6 -3 368.76 62.39
 6 6 3 318.57 62.29
 -6 -6 -3 438.86 99.29
 6 -6 3 356.26 52.89
 -6 -6 -3 387.66 64.79
 -6 -6 -3 341.37 51.89
 6 -6 3 333.37 89.99
 6 -6 3 394.86 75.79
 -5 6 -4 428.96 59.89
 -5 6 -4 404.86 63.79
 5 6 4 327.37 64.79
 5 6 4 434.16 69.29
 -5 -6 -4 285.37 86.69
 5 -6 4 345.87 78.49
 -5 -6 -4 363.56 55.39
 5 -6 4 309.47 78.29
 5 -6 4 419.16 55.69
 -5 -6 -4 436.36 66.49
 4 6 5 539.75 72.29
 -4 6 -5 408.66 65.79
 -4 6 -5 357.96 55.59
 4 6 5 420.36 67.59
 4 -6 5 294.47 77.89
 -4 -6 -5 410.06 55.79
 -4 -6 -5 210.58 79.29
 -4 -6 -5 416.86 64.59
 4 -6 5 385.56 54.39
 -3 6 -6 -2.5 13.6
 3 6 6 2.6 15.3
 -3 -6 -6 4.9 6.3
 -3 -6 -6 -0.7 9.5
 2 6 7 346.57 59.59
 2 6 7 425.06 66.89
 -2 6 -7 399.56 70.19
 2 -6 7 463.35 59.59
 -2 -6 -7 387.96 67.59
 -2 -6 -7 403.36 56.19
 1 6 8 957.6 120.19
 1 6 8 814.52 112.49
 -1 6 -8 681.93 119.89
 -1 -6 -8 578.64 118.19
 1 -6 8 844.12 105.69
 0 6 9 927.31 139.49
 0 6 9 1006.7 142.69
 0 6 -9 962 142.09
 0 -6 -9 757.72 143.89
 0 -6 -9 1031.7 134.59
 0 -6 9 1046.1 149.39
 0 -6 9 1091.59 135.79
 1 6 -10 514.55 105.79
 -1 6 10 698.23 113.39
 -1 6 10 601.34 108.89
 1 -6 -10 767.52 101.69
 1 -6 -10 832.32 102.79
 -1 -6 10 833.22 105.59
 1 -6 -10 514.95 115.99
 -1 -6 10 625.24 115.79
 2 6 -11 311.67 82.89
 -2 6 11 228.08 71.69
 -2 6 11 325.77 76.59
 -2 6 11 398.06 61.19
 2 -6 -11 298.47 65.79
 -2 -6 11 606.44 106.19
 2 -6 -11 461.25 65.79
 -2 -6 11 404.96 73.69
 2 -6 -11 228.38 65.59
 3 6 -12 72.79 56.59
 -3 6 12 12.2 21.8
 -3 6 12 7.6 23.1
 -3 6 12 15.8 35.7
 -3 -6 12 15.6 42
 -3 -6 12 19.4 10.3
 -3 -6 12 21.6 7.4
 -3 -6 12 -17.7 36.3
 3 -6 -12 0.6 15.8
 -4 6 13 88.59 61.49
 4 6 -13 161.18 66.49
 -4 6 13 107.29 29.9
 -4 6 13 160.38 55.09
 -4 6 13 87.99 36.5
 -4 -6 13 96.09 54.69
 4 -6 -13 170.18 39.3
 -4 -6 13 117.89 19.4
 -4 -6 13 155.48 56.09
 4 -6 -13 127.99 52.39
 4 -6 -13 105.49 18.7
 5 6 -14 247.98 89.79
 -5 6 14 359.36 64.89
 -5 6 14 247.18 68.69
 -5 6 14 217.08 74.69
 -5 -6 14 360.96 87.89
 -5 -6 14 226.28 80.99
 5 -6 -14 289.67 43.1
 5 -6 -14 362.16 88.29
 5 -6 -14 305.97 58.39
 -5 -6 14 308.77 43
 -5 -6 14 362.76 58.99
 -6 6 15 121.39 58.99
 6 6 -15 52.59 74.89
 -6 6 15 106.19 40.2
 -6 6 15 115.69 50.59
 6 -6 -15 128.29 24.5
 -6 -6 15 85.29 51.29
 6 -6 -15 72.29 67.29
 -6 -6 15 196.58 69.89
 -6 -6 15 151.88 42.3
 6 -6 -15 146.29 41.5
 7 7 2 105.59 41
 -7 7 -2 157.98 38.7
 7 7 2 205.78 41.4
 -7 7 -2 175.38 44.3
 -7 -7 -2 182.48 46
 -7 -7 -2 219.58 32.2
 7 -7 2 172.98 49.9
 7 -7 2 199.78 33
 7 -7 2 89.29 63.99
 -7 -7 -2 201.98 72.89
 6 7 3 25.5 20.1
 6 7 3 3 16.5
 -6 7 -3 31.3 18.4
 -6 7 -3 16.9 14.2
 6 -7 3 10.9 9
 -6 -7 -3 2.8 8.7
 6 -7 3 -3.4 42.1
 -6 -7 -3 27.9 47.8
 6 -7 3 18 26
 -6 -7 -3 -9 9.6
 5 7 4 198.88 49.2
 -5 7 -4 177.08 36.3
 -5 7 -4 184.88 40.5
 5 7 4 196.38 43.1
 -5 -7 -4 221.48 42.4
 5 -7 4 192.28 54.89
 5 -7 4 202.98 31.5
 5 -7 4 179.08 48
 -5 -7 -4 200.78 32.5
 -5 -7 -4 316.37 82.29
 -4 7 -5 24.6 16
 4 7 5 33.1 20.6
 -4 -7 -5 25.5 9.9
 4 -7 5 39.7 30.7
 -4 -7 -5 56.19 52.09
 -4 -7 -5 30.7 15.6
 4 -7 5 9 25.3
 4 -7 5 32.8 9.9
 3 7 6 1959.5 235.38
 -3 7 -6 1505.75 230.88
 -3 -7 -6 1877.71 233.68
 3 -7 6 1303.97 236.98
 -3 -7 -6 1830.12 224.28
 3 -7 6 1733.23 223.38
 2 7 7 58.39 23.5
 2 7 7 91.69 20.2
 -2 -7 -7 61.89 22.1
 2 -7 7 84.29 19
 -2 -7 -7 86.29 17.3
 1 7 8 228.68 38.4
 -1 7 -8 213.48 53.89
 1 7 8 221.68 47.8
 1 -7 8 208.08 35.5
 -1 -7 -8 188.98 50.89
 1 -7 8 206.58 48.4
 0 7 -9 30.8 21.2
 0 7 9 28.2 19.5
 0 7 9 22.9 15.9
 0 -7 -9 29.4 26.5
 0 -7 -9 42.1 18.3
 0 -7 9 -9.1 23.9
 0 -7 9 20.8 17.8
 0 -7 -9 50.69 18.9
 -1 7 10 69.49 31.7
 -1 7 10 320.47 63.09
 1 -7 -10 185.38 39.4
 1 -7 -10 205.58 39.7
 -1 -7 10 122.29 39.9
 1 -7 -10 34.4 38.5
 -1 -7 10 107.69 43.7
 2 7 -11 108.19 53.39
 -2 7 11 135.99 42.8
 -2 7 11 115.09 48.9
 -2 7 11 166.28 41.5
 2 -7 -11 126.79 44.5
 2 -7 -11 212.78 43.2
 2 -7 -11 157.28 44.9
 -2 -7 11 115.19 25.2
 -2 -7 11 274.27 66.09
 -3 7 12 1456.45 182.08
 -3 7 12 1378.66 179.08
 -3 7 12 1186.68 193.78
 3 7 -12 1052.59 199.28
 -3 -7 12 1314.67 169.48
 -3 -7 12 1303.37 195.68
 3 -7 -12 1310.67 183.28
 3 -7 -12 1164.08 187.58
 -3 -7 12 1408.36 211.38
 -3 -7 12 1323.17 169.48
 -4 7 13 21.6 26.6
 -4 7 13 34.9 31.8
 -4 7 13 0.4 18.3
 4 7 -13 6 49.1
 -4 7 13 14.4 55.29
 -4 -7 13 59.79 42.9
 4 -7 -13 21.2 7.1
 -4 -7 13 36.4 43.7
 4 -7 -13 110.09 42.6
 4 -7 -13 9.8 19.7
 -4 -7 13 30.8 8.8
 -5 7 14 297.27 60.99
 -5 7 14 278.57 65.69
 5 7 -14 199.88 86.59
 -5 7 14 207.58 75.29
 -5 -7 14 311.37 82.19
 -5 -7 14 353.06 56.49
 5 -7 -14 288.97 57.99
 5 -7 -14 304.17 80.09
 -5 -7 14 284.07 40.5
 -5 -7 14 221.78 81.29
 5 -7 -14 255.67 40
 6 7 -15 -96.39 52.99
 -6 7 15 10.4 37.8
 -6 7 15 5.3 25.3
 -6 7 15 -24.8 46.5
 6 -7 -15 -13.6 6.6
 -6 -7 15 -40.5 41.4
 6 -7 -15 -8.3 15.9
 -6 -7 15 -34.3 22.3
 6 -7 -15 -45.6 44.6
 -6 -7 15 28 49.8
 7 8 2 25.8 25.1
 7 8 2 62.39 22.3
 -7 8 -2 39.2 21.3
 -7 8 -2 74.59 25.9
 7 -8 2 -4.9 50.29
 -7 -8 -2 -0.6 55.79
 7 -8 2 56.19 35.4
 -7 -8 -2 54.69 15.5
 -7 -8 -2 24.1 17.5
 7 -8 2 43.4 15.2
 6 8 3 664.53 105.19
 6 8 3 680.23 98.29
 -6 8 -3 693.63 95.99
 -6 8 -3 601.74 99.89
 -6 -8 -3 668.93 104.29
 -6 -8 -3 553.04 135.29
 6 -8 3 393.16 115.49
 -6 -8 -3 727.13 92.39
 6 -8 3 722.53 114.19
 6 -8 3 738.03 92.49
 5 8 4 142.99 41
 5 8 4 167.58 45.7
 -5 8 -4 252.57 46.8
 5 -8 4 193.38 30.7
 -5 -8 -4 162.18 70.29
 -5 -8 -4 146.69 31
 5 -8 4 216.08 53.89
 -5 -8 -4 240.48 43.7
 5 -8 4 351.76 64.69
 -4 8 -5 258.37 54.99
 4 8 5 197.68 53.09
 4 8 5 261.27 56.49
 -4 -8 -5 213.48 77.39
 -4 -8 -5 328.87 44
 4 -8 5 252.17 55.69
 -4 -8 -5 357.06 54.49
 4 -8 5 276.97 40.7
 4 -8 5 483.95 92.29
 -3 8 -6 16.1 21.8
 3 8 6 1.3 16.3
 -3 -8 -6 5.6 9
 3 -8 6 -11 22.9
 3 -8 6 21.4 14.7
 -3 -8 -6 12.4 12.3
 -2 8 -7 500.55 86.79
 2 8 7 606.64 91.29
 2 8 7 630.64 78.69
 2 -8 7 564.94 74.69
 -2 -8 -7 533.75 74.69
 2 -8 7 423.16 73.09
 -2 -8 -7 598.64 87.89
 1 8 8 330.57 69.09
 -1 8 -8 371.06 69.99
 1 8 8 413.36 56.59
 1 -8 8 425.76 62.89
 1 -8 8 274.17 55.99
 -1 -8 -8 342.37 69.99
 0 8 9 449.76 96.09
 0 8 9 616.74 90.79
 0 -8 -9 641.94 105.39
 0 -8 -9 682.53 93.09
 0 -8 9 845.32 109.89
 0 -8 9 522.75 91.99
 0 -8 -9 610.44 88.09
 -1 8 10 299.67 60.49
 -1 8 10 258.17 80.89
 1 -8 -10 193.58 51.69
 -1 -8 10 237.28 64.29
 -1 -8 10 384.16 83.59
 1 -8 -10 289.77 67.19
 -2 8 11 207.28 68.89
 -2 8 11 392.46 83.19
 2 -8 -11 361.86 69.39
 -2 -8 11 359.16 80.89
 2 -8 -11 294.07 79.19
 2 -8 -11 409.66 65.79
 -2 -8 11 305.77 73.69
 -3 8 12 16.5 33.4
 -3 8 12 -4.9 38.5
 3 8 -12 -32.9 42.4
 -3 8 12 15.6 24.5
 -3 8 12 -13.4 13.3
 -3 -8 12 16.9 15.1
 3 -8 -12 -1.2 30.4
 -3 -8 12 -8.8 38
 -3 -8 12 18.9 7.3
 -3 -8 12 2 7.1
 3 -8 -12 -3.6 19.7
 -3 -8 12 -44.7 30.5
 -4 8 13 -33 22.4
 -4 8 13 24.1 21.6
 -4 8 13 -20.1 51.29
 4 8 -13 0.7 51.69
 -4 8 13 0.8 24.2
 -4 -8 13 15.5 41.8
 4 -8 -13 28.5 24.3
 -4 -8 13 24.2 9
 4 -8 -13 54.99 44.6
 -4 -8 13 43.6 47
 -5 8 14 85.79 38.9
 5 8 -14 66.89 67.59
 -5 8 14 116.09 35.9
 -5 8 14 106.59 49.99
 5 -8 -14 126.39 19.7
 5 -8 -14 124.79 56.79
 -5 -8 14 140.99 61.09
 -5 -8 14 118.19 20.2
 5 -8 -14 90.39 31.4
 -5 -8 14 31.4 42.8
 -5 -8 14 91.99 29.4
 -6 8 15 236.78 68.19
 -6 8 15 352.66 89.29
 -6 8 15 373.66 74.09
 -6 -8 15 207.78 88.49
 -6 -8 15 295.17 68.09
 -6 -8 15 377.66 97.79
 6 -8 -15 222.08 89.19
 6 -8 -15 355.86 63.09
 6 -8 -15 300.97 46.7
 -6 -8 15 345.87 46.7
 7 9 2 39.2 19.9
 7 9 2 30.4 27.5
 -7 9 -2 29.1 20.4
 -7 9 -2 11.3 19.7
 7 -9 2 -14.8 26.1
 7 -9 2 26.9 11.4
 -7 -9 -2 2.4 8.7
 7 -9 2 7.2 53.29
 -7 -9 -2 19.6 17.8
 -7 -9 -2 37.1 63.19
 -6 9 -3 -17.7 13.2
 6 9 3 27.7 23.5
 6 9 3 20.6 16.8
 -6 -9 -3 5.4 9.1
 6 -9 3 11.1 28.1
 6 -9 3 3.1 8.3
 6 -9 3 17.2 41.2
 -6 -9 -3 -24.5 47.9
 -6 -9 -3 4 11.4
 5 9 4 5.4 20
 5 9 4 22.2 16.5
 -5 9 -4 22.6 16.5
 -5 -9 -4 11.3 52.49
 5 -9 4 14.3 27.2
 -5 -9 -4 2.2 8.2
 5 -9 4 9.7 29.6
 -5 -9 -4 16.9 12.4
 5 -9 4 16.7 8.2
 -4 9 -5 354.76 71.29
 4 9 5 473.55 80.19
 4 9 5 349.57 66.29
 -4 -9 -5 500.05 72.39
 -4 -9 -5 379.66 103.39
 4 -9 5 463.65 84.29
 -4 -9 -5 472.75 62.09
 -3 9 -6 661.53 113.89
 3 9 6 757.42 119.89
 3 -9 6 883.61 105.59
 3 -9 6 698.13 123.39
 -3 -9 -6 801.52 104.69
 -3 -9 -6 679.53 111.99
 2 9 7 1284.17 203.68
 2 9 7 1612.14 194.78
 -2 9 -7 1356.96 199.48
 -2 -9 -7 1268.97 189.98
 -2 -9 -7 1445.96 201.98
 2 -9 7 1525.15 187.98
 2 -9 7 1562.94 190.28
 1 9 8 158.98 27.9
 1 9 8 86.89 33.4
 -1 9 -8 106.29 30.6
 -1 -9 -8 155.58 39.3
 1 -9 8 133.39 35.2
 1 -9 8 102.09 29.8
 0 9 9 39.7 30
 0 9 9 10.6 11.3
 0 -9 -9 16.8 22.1
 0 -9 9 52.19 32.6
 0 -9 -9 15.6 17.5
 0 -9 -9 0.9 24.7
 -1 9 10 22.2 22.3
 -1 9 10 48.4 42.3
 1 -9 -10 67.49 39.2
 1 -9 -10 51.69 22.7
 -1 -9 10 62.79 40.5
 1 -9 -10 86.69 30.6
 -1 -9 10 68.39 39
 -2 9 11 609.34 103.79
 -2 9 11 302.87 101.89
 2 -9 -11 590.14 88.79
 2 -9 -11 360.66 83.59
 2 -9 -11 444.86 97.39
 -2 -9 11 709.43 126.39
 -2 -9 11 542.15 102.49
 -3 9 12 209.38 50.39
 -3 9 12 157.18 64.29
 -3 9 12 305.17 46
 -3 9 12 209.48 46.7
 3 -9 -12 130.19 46.3
 -3 -9 12 137.79 39.4
 -3 -9 12 216.08 71.99
 3 -9 -12 151.48 46
 -3 -9 12 53.89 43.5
 -3 -9 12 196.48 29.2
 -4 9 13 697.23 120.99
 -4 9 13 722.83 137.79
 -4 9 13 851.41 120.69
 -4 -9 13 823.82 107.39
 -4 -9 13 922.71 158.68
 4 -9 -13 849.22 129.09
 4 -9 -13 746.43 135.29
 -4 -9 13 870.41 147.59
 -5 9 14 6.2 32.4
 -5 9 14 2.2 20.2
 -5 9 14 -15.8 24.1
 -5 -9 14 8.7 51.39
 -5 -9 14 -30.7 38.3
 5 -9 -14 -10.3 21.3
 -5 -9 14 -9.6 15
 5 -9 -14 23 39.5
 5 -9 -14 18.8 8.1
 -5 -9 14 -4.7 6.7
 -6 9 15 -3.9 32
 -6 9 15 41.6 31.5
 -6 9 15 9.9 42.6
 -6 -9 15 -44.9 45.6
 6 -9 -15 11.1 8.9
 6 -9 -15 18.4 60.49
 -6 -9 15 14.2 22.1
 -6 -9 15 5.7 8.5
 -6 -9 15 148.39 67.59
 6 -9 -15 23.3 20.8
 -7 10 -2 282.87 65.69
 7 10 2 332.27 76.59
 7 -10 2 332.57 90.29
 -7 -10 -2 340.17 98.59
 -7 -10 -2 277.87 71.69
 7 -10 2 336.37 50.69
 6 10 3 -21.2 23.6
 -6 10 -3 -14.9 14.4
 6 10 3 11.8 12.1
 -6 -10 -3 17.6 57.19
 6 -10 3 -31 39.1
 -6 -10 -3 -7.1 9.1
 6 -10 3 1.8 7.7
 -6 -10 -3 24.2 15
 6 -10 3 -14.6 22.6
 5 10 4 571.34 101.49
 -5 10 -4 607.44 91.79
 5 10 4 574.04 84.89
 5 -10 4 627.94 81.19
 5 -10 4 631.04 102.69
 -5 -10 -4 628.64 93.99
 5 -10 4 512.05 99.69
 -5 -10 -4 660.43 83.69
 -5 -10 -4 297.17 112.49
 -4 10 -5 -9.7 17.4
 4 10 5 12.1 15.5
 4 10 5 -6.2 21.8
 -4 -10 -5 33.9 15.7
 4 -10 5 30.2 23.8
 4 -10 5 9.3 27.9
 -4 -10 -5 5.7 9.6
 -3 10 -6 18.3 21.5
 3 10 6 53.89 28
 -3 -10 -6 24.8 17
 -3 -10 -6 34.7 14.1
 3 -10 6 26.8 16.9
 3 -10 6 55.19 31.6
 2 10 7 -0.6 22.3
 2 10 7 3.8 6.8
 -2 10 -7 7.9 19.2
 -2 -10 -7 7.3 18.1
 2 -10 7 5.5 9.8
 1 10 8 905.11 117.69
 1 10 8 736.33 133.89
 1 -10 8 715.13 124.39
 -1 -10 -8 1052.69 127.29
 -1 -10 -8 718.03 129.49
 0 10 9 38.1 14.5
 0 10 9 32.1 35.5
 0 -10 -9 1.5 18.1
 0 -10 9 16.3 28.6
 0 -10 -9 26 23.6
 -1 10 10 836.92 127.99
 1 -10 -10 885.81 127.69
 -1 -10 10 896.11 139.99
 1 -10 -10 912.91 131.99
 -1 -10 10 855.01 146.19
 1 -10 -10 845.02 146.59
 -2 10 11 25.7 17.3
 -2 10 11 -47.5 30.5
 -2 10 11 8.3 25.5
 2 -10 -11 -32.9 25.5
 -2 -10 11 -36.1 41
 -2 -10 11 1 42.3
 2 -10 -11 13.1 24
 2 -10 -11 -42.8 21.6
 -2 -10 11 17.9 38.3
 -3 10 12 0.2 48.9
 -3 10 12 -6.7 13.4
 -3 10 12 -31.5 26.9
 -3 -10 12 -32.2 46.5
 -3 -10 12 6.9 19.5
 -3 -10 12 43.8 49.99
 -3 -10 12 -9.5 8.2
 3 -10 -12 -4.2 30.8
 3 -10 -12 17.8 25.4
 -4 10 13 1.2 19.4
 -4 10 13 -44.2 35.3
 -4 10 13 57.19 58.99
 -4 10 13 5.7 26.9
 -4 -10 13 1.8 8.4
 4 -10 -13 -15.7 20.9
 -4 -10 13 25.6 44.7
 -4 -10 13 18.3 37.1
 4 -10 -13 36.9 34.7
 -5 10 14 249.08 65.39
 -5 10 14 345.57 72.29
 -5 10 14 172.48 64.49
 -5 -10 14 369.46 60.29
 5 -10 -14 378.26 77.09
 5 -10 -14 354.06 45.3
 5 -10 -14 201.28 73.59
 -5 -10 14 403.76 98.99
 -5 -10 14 210.68 85.09
 -6 10 15 -15.4 33.7
 -6 10 15 83.79 62.99
 -6 10 15 12.8 26.4
 -6 -10 15 -30.1 47.6
 -6 -10 15 8.6 24.5
 6 -10 -15 -23.2 18.6
 -6 -10 15 9.8 7.6
 6 -10 -15 -10 44
 -6 -10 15 -14.3 51.59
 6 -10 -15 12.6 7.5
 7 11 2 45 33
 -7 11 -2 69.19 50.29
 -7 -11 -2 39.6 67.39
 7 -11 2 57.89 86.19
 7 -11 2 129.49 62.19
 6 11 3 6.9 25.7
 6 11 3 -4.6 12
 -6 11 -3 -3.5 17.6
 -6 -11 -3 -3.3 66.39
 -6 -11 -3 -2.7 13.1
 6 -11 3 21.5 41.6
 6 -11 3 -8.3 6.1
 5 11 4 10.5 13
 5 11 4 27.6 26.8
 -5 11 -4 -7.3 16.4
 -5 -11 -4 10.1 13.6
 5 -11 4 35.9 33.9
 5 -11 4 -5.1 22.7
 5 -11 4 1.6 6
 -5 -11 -4 -8.4 59.19
 -5 -11 -4 32.9 13
 4 11 5 329.07 49.99
 4 11 5 245.98 74.49
 -4 11 -5 297.37 56.29
 4 -11 5 278.97 58.39
 -4 -11 -5 324.77 49
 4 -11 5 412.46 76.29
 -4 -11 -5 275.57 56.49
 -3 11 -6 914.81 133.49
 3 11 6 821.92 139.19
 -3 -11 -6 870.71 130.79
 3 -11 6 970.8 122.09
 3 -11 6 767.52 137.39
 -3 -11 -6 925.71 121.89
 2 11 7 488.65 98.79
 -2 11 -7 407.76 87.99
 2 -11 7 519.65 71.89
 -2 -11 -7 609.74 91.39
 2 -11 7 570.34 70.29
 2 -11 7 304.17 93.79
 1 11 8 584.34 126.79
 1 11 8 751.52 104.59
 1 -11 8 729.63 115.69
 -1 -11 -8 1008.2 126.29
 -1 -11 -8 796.72 114.19
 1 -11 8 704.53 108.59
 0 11 9 17.4 10.8
 0 -11 -9 -8.2 23.9
 0 -11 9 -14.6 23.7
 0 -11 9 7.5 32.7
 0 -11 -9 5.3 21.2
 0 -11 -9 -4.1 18.2
 -1 11 10 70.39 46.3
 1 -11 -10 219.28 53.69
 -1 -11 10 110.39 53.99
 1 -11 -10 75.99 33.8
 -1 -11 10 37 44
 1 -11 -10 116.19 34.5
 -2 11 11 43.4 18.6
 -2 11 11 -30.8 33.2
 -2 11 11 14.7 22.5
 -2 -11 11 24.7 42.1
 -2 -11 11 54.79 50.59
 -2 -11 11 107.09 45.3
 2 -11 -11 -5.5 26.1
 2 -11 -11 15.9 26.9
 2 -11 -11 0.4 25.5
 -3 11 12 557.24 86.49
 -3 11 12 589.14 112.09
 -3 -11 12 591.04 77.69
 3 -11 -12 472.55 98.59
 3 -11 -12 582.44 102.29
 -3 -11 12 716.73 127.09
 -3 -11 12 479.45 86.29
 -3 -11 12 660.63 126.59
 -4 11 13 271.17 59.79
 -4 11 13 261.77 68.29
 -4 -11 13 314.37 44.9
 -4 -11 13 242.98 74.69
 4 -11 -13 363.86 79.99
 4 -11 -13 285.97 74.69
 -4 -11 13 357.66 100.19
 -5 11 14 29.5 45.2
 -5 11 14 105.89 50.99
 -5 11 14 56.59 30
 -5 -11 14 68.19 52.59
 -5 -11 14 46.8 13.8
 5 -11 -14 28.2 9.9
 5 -11 -14 23.9 29.9
 5 -11 -14 110.19 54.29
 -5 -11 14 33 24.9
 -5 -11 14 56.39 63.29
 -6 -11 15 4.4 8.5
 -6 -11 15 20 25.7
 6 -11 -15 21.3 9.3
 6 12 3 370.36 85.49
 -6 12 -3 389.36 70.09
 6 -12 3 274.97 76.89
 -6 -12 -3 333.57 112.19
 6 -12 3 359.16 78.99
 -6 -12 -3 339.37 54.69
 6 -12 3 363.96 52.39
 -6 -12 -3 303.77 69.09
 5 12 4 75.89 44.4
 -5 12 -4 57.19 25.3
 5 12 4 62.49 16
 5 -12 4 21.4 29.7
 -5 -12 -4 34.8 63.39
 -5 -12 -4 83.29 25.4
 5 -12 4 88.19 36.5
 -5 -12 -4 62.99 18.1
 -4 12 -5 266.57 71.99
 4 12 5 441.96 63.09
 4 12 5 390.96 91.59
 -4 -12 -5 499.75 66.29
 4 -12 5 423.46 71.79
 4 -12 5 480.75 85.79
 -4 -12 -5 560.64 78.69
 3 12 6 12.9 26.1
 -3 12 -6 27.6 17.2
 3 12 6 1.4 17.9
 3 -12 6 30.9 17
 3 -12 6 32.2 38
 -3 -12 -6 83.69 20.1
 -3 -12 -6 12.2 22.5
 2 12 7 493.65 111.09
 2 -12 7 582.44 81.59
 -2 -12 -7 562.94 97.09
 2 -12 7 610.44 77.89
 2 -12 7 568.24 101.79
 1 12 8 7.9 7.9
 1 12 8 50.29 39.1
 -1 -12 -8 31.3 31
 1 -12 8 -35.8 30.7
 1 -12 8 21.7 16.5
 -1 -12 -8 2.6 19.3
 0 12 9 613.34 137.59
 0 12 9 812.22 111.19
 0 -12 -9 890.51 118.19
 0 -12 9 850.21 133.39
 0 -12 -9 938.91 125.69
 0 -12 9 778.62 130.79
 0 -12 -9 507.95 127.69
 -1 12 10 49.8 44.1
 -1 12 10 60.69 22.5
 1 -12 -10 49.3 39
 1 -12 -10 108.39 36.1
 1 -12 -10 92.69 41.5
 -1 -12 10 144.09 55.89
 -1 -12 10 50.09 39.1
 -2 12 11 552.64 102.89
 -2 12 11 659.73 94.79
 2 -12 -11 738.23 118.39
 -2 -12 11 479.05 127.69
 2 -12 -11 719.83 106.89
 -2 -12 11 637.04 126.89
 2 -12 -11 679.83 114.49
 -3 12 12 20.9 31.7
 -3 12 12 -38.4 52.99
 -3 12 12 -4.6 17.3
 3 -12 -12 65.59 33.8
 -3 -12 12 25.1 13.1
 3 -12 -12 7.1 30.6
 -3 -12 12 -61.79 45.2
 -3 -12 12 43 40.6
 -4 12 13 121.49 51.29
 -4 12 13 157.78 40.1
 4 -12 -13 189.18 57.89
 -4 -12 13 159.18 29.6
 -4 -12 13 174.28 67.99
 -4 -12 13 146.99 80.09
 4 -12 -13 140.79 46.2
 -5 12 14 -11.1 38.2
 -5 -12 14 -5.4 40.5
 -5 -12 14 -3.1 9.6
 5 -12 -14 6.4 25.7
 5 -12 -14 -31.4 40.1
 -5 -12 14 79.09 108.09
 6 13 3 28.1 34
 -6 13 -3 -16.4 21.3
 6 -13 3 25.1 32.6
 6 -13 3 -27.2 77.89
 -6 -13 -3 32 14.7
 6 -13 3 53.19 46.6
 -6 -13 -3 18.6 18.2
 6 -13 3 19.3 11
 -5 13 -4 148.39 32.5
 5 13 4 65.89 41.6
 -5 -13 -4 71.99 76.49
 -5 -13 -4 78.29 21
 5 -13 4 132.49 42.8
 5 -13 4 109.09 40.7
 -5 -13 -4 58.29 24.9
 4 13 5 13.4 34.5
 4 13 5 27.2 10.5
 -4 -13 -5 19.2 16.2
 -4 -13 -5 18.4 13.3
 4 -13 5 34.7 30.6
 4 -13 5 31.4 22.3
 3 13 6 566.44 92.49
 3 13 6 841.22 179.78
 -3 -13 -6 708.83 97.99
 -3 -13 -6 1004.8 115.69
 3 -13 6 730.83 114.79
 2 13 7 520.05 112.39
 -2 -13 -7 569.04 94.29
 2 -13 7 327.47 90.39
 2 -13 7 588.74 75.89
 1 13 8 121.29 24.1
 1 13 8 28.2 45.5
 1 -13 8 141.89 46.6
 -1 -13 -8 104.49 39.1
 -1 -13 -8 72.29 28.8
 0 13 9 58.99 52.99
 0 13 9 228.18 34.6
 0 -13 -9 225.98 59.79
 0 -13 -9 209.68 67.19
 0 -13 9 108.29 45.8
 0 -13 9 179.28 56.59
 -1 13 10 26.5 14.4
 -1 13 10 14.5 42.8
 -1 13 10 35.6 15
 1 -13 -10 28.1 28.6
 -1 -13 10 25.7 49.7
 -1 -13 10 -14.3 31.2
 1 -13 -10 29 30.2
 1 -13 -10 29.8 35.8
 -1 -13 10 54.89 46.9
 -2 13 11 84.89 29.5
 -2 13 11 64.19 57.49
 -2 13 11 182.08 38.2
 2 -13 -11 140.09 45.6
 -2 -13 11 78.49 40.1
 2 -13 -11 168.08 47.9
 2 -13 -11 72.29 38.6
 -2 -13 11 127.99 59.89
 -2 -13 11 209.88 62.89
 -3 13 12 797.52 126.79
 -3 13 12 904.31 120.99
 -3 -13 12 752.62 121.39
 -3 -13 12 877.41 158.18
 3 -13 -12 744.43 135.49
 -3 -13 12 925.01 159.98
 -3 -13 12 783.62 110.89
 3 -13 -12 840.72 131.09
 -4 13 13 52.69 40.5
 -4 13 13 97.89 31.7
 -4 -13 13 83.79 51.29
 4 -13 -13 113.79 41.5
 4 -13 -13 88.59 50.59
 -4 -13 13 108.99 75.49
 -4 -13 13 49.5 18.6
 -5 13 14 154.28 46.7
 -5 13 14 80.99 52.09
 5 -13 -14 191.28 66.89
 -5 -13 14 194.48 39.7
 -5 -13 14 121.89 26.1
 5 -13 -14 102.69 41.8
 -5 -13 14 143.29 83.19
 -5 -13 14 144.29 76.69
 6 14 3 58.19 39.8
 -6 -14 -3 47.4 78.39
 6 -14 3 53.39 42.7
 -6 -14 -3 48.3 23.5
 -6 -14 -3 40.9 17.8
 6 -14 3 51.89 92.09
 6 -14 3 64.79 15.8
 6 -14 3 44.7 37.1
 5 14 4 332.07 95.99
 -5 -14 -4 245.18 104.59
 5 -14 4 489.95 80.89
 -5 -14 -4 355.06 59.79
 5 -14 4 424.06 83.29
 -5 -14 -4 373.46 71.89
 4 14 5 95.69 48.8
 -4 -14 -5 138.59 29.2
 4 -14 5 116.59 33.1
 -4 -14 -5 101.39 31.6
 4 -14 5 130.39 43.9
 3 14 6 5.7 36.7
 -3 -14 -6 20.8 21.8
 -3 -14 -6 3.8 13.3
 3 -14 6 16.9 26.8
 3 -14 6 16.3 18.5
 2 14 7 -3.3 34.5
 -2 -14 -7 -11.3 17.1
 2 -14 7 -13.6 12.7
 2 -14 7 36.9 27.7
 -2 -14 -7 71.49 29.1
 1 14 8 523.45 71.99
 1 14 8 273.67 91.99
 -1 -14 -8 595.94 89.69
 1 -14 8 401.76 70.49
 1 -14 8 619.34 101.29
 -1 -14 -8 835.62 107.09
 0 14 9 68.79 54.09
 0 14 9 196.68 33.8
 0 14 9 193.78 34.6
 0 -14 9 138.49 46.5
 0 -14 -9 200.78 54.19
 0 -14 -9 256.97 56.79
 0 -14 -9 157.78 42.6
 0 -14 9 328.07 70.99
 0 -14 9 150.28 72.69
 -1 14 10 902.81 127.49
 -1 14 10 888.41 126.49
 -1 -14 10 894.01 151.58
 1 -14 -10 967.8 136.89
 1 -14 -10 1106.39 151.78
 -1 -14 10 843.12 154.48
 1 -14 -10 708.83 153.78
 -2 14 11 86.19 24.8
 -2 14 11 24.3 55.29
 -2 14 11 54.59 24.5
 2 -14 -11 6.8 29
 -2 -14 11 68.19 59.69
 -2 -14 11 60.79 40.4
 2 -14 -11 45.9 33.8
 2 -14 -11 36.1 33.3
 -2 -14 11 263.57 69.19
 -3 14 12 18.4 17.6
 -3 14 12 -10 20.7
 -3 14 12 32.5 63.39
 -3 -14 12 10.9 21.6
 3 -14 -12 5 32.2
 -3 -14 12 2.3 54.89
 3 -14 -12 -3 27.2
 -3 -14 12 -31.6 29.1
 -4 14 13 21 30.9
 -4 14 13 -0.3 24.3
 -4 -14 13 64.79 64.79
 4 -14 -13 -17.7 28.1
 -4 -14 13 27.9 40.2
 -4 -14 13 -24.3 9.9
 4 -14 -13 5.7 40.4
 -5 14 14 143.99 62.69
 -5 14 14 141.09 46.9
 -5 -14 14 116.39 72.09
 -5 -14 14 365.26 111.89
 -5 -14 14 227.48 52.19
 5 -14 -14 390.76 87.09
 5 -14 -14 224.48 61.89
 -5 -14 14 209.38 36.8
 6 15 3 69.69 44.6
 6 -15 3 -29.4 35.4
 -6 -15 -3 14.6 22.9
 -6 -15 -3 117.39 80.09
 5 15 4 38.7 41.7
 5 -15 4 53.99 32.1
 5 -15 4 35.9 35.6
 5 -15 4 -71.59 84.59
 -5 -15 -4 13.1 19
 -5 -15 -4 49.9 74.69
 -5 -15 -4 15.7 14.9
 4 15 5 321.57 95.79
 -4 -15 -5 423.36 74.09
 -4 -15 -5 431.56 61.99
 4 -15 5 159.68 110.09
 4 -15 5 375.66 79.49
 4 -15 5 409.46 67.89
 3 15 6 36.9 39.6
 -3 -15 -6 3.5 20.6
 3 -15 6 25.7 18.6
 -3 -15 -6 14.5 16.8
 3 -15 6 11 26.6
 2 15 7 458.15 60.29
 2 15 7 416.96 111.89
 2 -15 7 445.66 68.19
 -2 -15 -7 444.06 88.29
 2 -15 7 323.67 83.09
 -2 -15 -7 467.15 82.59
 1 15 8 27.8 12
 1 15 8 0.7 45.1
 -1 -15 -8 30.6 27.1
 1 -15 8 20 12.4
 1 -15 8 22.8 45.2
 1 -15 8 105.59 41.9
 1 -15 8 -40 66.89
 -1 -15 -8 77.19 40.8
 0 15 9 14.8 10
 0 15 9 20.6 13.2
 0 15 9 10.4 42.2
 0 -15 9 57.29 32.5
 0 -15 -9 81.79 39.6
 0 -15 9 -28.3 58.99
 0 -15 -9 44.2 28.5
 0 -15 9 75.29 50.99
 0 -15 -9 8.3 22.6
 -1 15 10 41.1 18.4
 -1 15 10 13.8 10.4
 -1 15 10 2 39.6
 1 -15 -10 9.3 29.2
 -1 -15 10 33.5 49.5
 1 -15 -10 21 32.9
 -1 -15 10 -62.49 32.1
 1 -15 -10 -0.1 36.4
 -1 -15 10 -33.2 45.2
 -2 15 11 360.36 58.19
 2 -15 -11 276.67 69.59
 -2 -15 11 207.98 69.59
 -2 -15 11 442.66 101.79
 2 -15 -11 443.46 89.49
 -2 -15 11 408.66 82.19
 2 -15 -11 283.67 68.39
 -3 15 12 1.8 18.7
 -3 15 12 0.4 66.99
 -3 15 12 16 21.2
 -3 -15 12 -22.5 56.09
 3 -15 -12 9.9 30.7
 -3 -15 12 41.9 39
 -3 -15 12 2.3 23.1
 3 -15 -12 63.09 43.6
 -4 15 13 532.25 95.99
 -4 15 13 514.85 93.99
 -4 -15 13 669.53 150.98
 -4 -15 13 604.64 130.49
 4 -15 -13 446.56 108.29
 -4 -15 13 492.85 75.19
 -5 15 14 10 44.3
 -5 15 14 35.3 30.5
 -5 -15 14 39.9 16.3
 -5 -15 14 33.3 72.59
 5 -15 -14 49.4 38.3
 -5 -15 14 91.29 67.99
 -5 -15 14 83.59 27.7
 5 16 4 57.69 51.79
 -5 -16 -4 61.69 80.49
 5 -16 4 59.49 43.5
 5 -16 4 -51.39 86.59
[truncated: 343,677 more chars]
